# Supplementary material for: PepSeq as a highly multiplexed platform for melioidosis antigen discovery and vaccine development
Source: Front Immunol. 2025 Jul 3;16:1605758. doi: 10.3389/fimmu.2025.1605758 (PMC12267161; doi:10.3389/fimmu.2025.1605758)
Supplement: Supplementary file 3 [file Table1.xlsx]

## Sheet: Supplementary_Table_1
Supplementary Table 1. BKP1 Peptide Library Metadata
CodeName	FullName	SequenceAccession	Source	StartIndex	StopIndex	PeptideSequence	DesignCategory	NumCys	NumCysOriginal	ClusterID
BKP1_000000	tr|A0A0F6LHI5|A0A0F6LHI5_BURPE Uncharacterized protein OS=Burkholderia pseudomallei MSHR4000 OX=1435370 GN=X980_6193 PE=4 SV=1_000_030	A0A0F6LHI5	Uniprot	0	30	MRIMFSVSHPGVRPFAFGPRRGGFEIAMQK	SW	0	1	id_50_24629
BKP1_000001	tr|A0A0F6LHI5|A0A0F6LHI5_BURPE Uncharacterized protein OS=Burkholderia pseudomallei MSHR4000 OX=1435370 GN=X980_6193 PE=4 SV=1_013_043	A0A0F6LHI5	Uniprot	13	43	PFAFGPRRGGFEIAMQKQLQHAAYESHVPS	SW	0	1	id_50_24629
BKP1_000002	WP_004525324.1 MULTISPECIES: T3SS-associated acyl carrier protein BapB [Burkholderia]_000_030	WP_004525324.1	GenBank	0	30	MTAGPHLSDAAALAAAKTLLAGMLGVPEAQ	SW	0	0	id_50_18958
BKP1_000003	WP_004525324.1 MULTISPECIES: T3SS-associated acyl carrier protein BapB [Burkholderia]_022_052	WP_004525324.1	GenBank	22	52	MLGVPEAQIAPPQRLLDDLAMDSLELIELA	SW	0	0	id_50_18958
BKP1_000004	WP_004525324.1 MULTISPECIES: T3SS-associated acyl carrier protein BapB [Burkholderia]_063_093	WP_004525324.1	GenBank	63	93	DRARLAEVATVADVAALLGAAARADDSGGA	SW	0	0	id_50_18958
BKP1_000005	WP_038788965.1 phosphopantetheine-binding protein [Burkholderia pseudomallei]_0057	WP_038788965.1	GenBank	23	53	LGVPEAEIAPEQRLLEDLAMDSLELVELAM	SC	0	0	id_50_18958
BKP1_000006	WP_038788965.1 phosphopantetheine-binding protein [Burkholderia pseudomallei]_0043	WP_038788965.1	GenBank	48	78	VELAMELDERWNIRLDRVRLAGVATVADVA	SC	0	0	id_50_18958
BKP1_000007	WP_038788965.1 phosphopantetheine-binding protein [Burkholderia pseudomallei]_0003	WP_038788965.1	GenBank	6	36	PDAAAALAMAKTLLAGMLGVPEAEIAPEQR	SC	0	0	id_50_18958
BKP1_000008	WP_038763539.1 T3SS-associated acyl carrier protein BapB [Burkholderia pseudomallei]_0007	WP_038763539.1	GenBank	36	66	LLDDLAMDSLELIELAMELGERWNIRLDRA	SC	0	0	id_50_18958
BKP1_000009	WP_122885665.1 T3SS-associated acyl carrier protein BapB [Burkholderia pseudomallei]_0040	WP_122885665.1	GenBank	1	31	TAGPHLSDAAALAAAKALLAGMLGVPEAQI	SC	0	0	id_50_18958
BKP1_000010	WP_004530059.1 MULTISPECIES: M28 family metallopeptidase [Burkholderia]_000_030	WP_004530059.1	GenBank	0	30	MSKLQHLAAAVCGALCVSAAHAAPVWITLS	SW	2	2	id_50_4909
BKP1_000011	WP_004530059.1 MULTISPECIES: M28 family metallopeptidase [Burkholderia]_022_052	WP_004530059.1	GenBank	22	52	APVWITLSEPALRELRALDPAVTSRYSAAL	SW	0	0	id_50_4909
BKP1_000012	WP_004530059.1 MULTISPECIES: M28 family metallopeptidase [Burkholderia]_044_074	WP_004530059.1	GenBank	44	74	TSRYSAALATGDAKRTETIHVAQVDDSLLE	SW	0	0	id_50_4909
BKP1_000013	WP_004530059.1 MULTISPECIES: M28 family metallopeptidase [Burkholderia]_066_096	WP_004530059.1	GenBank	66	96	QVDDSLLESLSQAIRRTRGHGPGFFVHATF	SW	0	0	id_50_4909
BKP1_000014	WP_004530059.1 MULTISPECIES: M28 family metallopeptidase [Burkholderia]_088_118	WP_004530059.1	GenBank	88	118	GFFVHATFDEARASLQPSAAKQAAAIDYPI	SW	0	0	id_50_4909
BKP1_000015	WP_004530059.1 MULTISPECIES: M28 family metallopeptidase [Burkholderia]_110_140	WP_004530059.1	GenBank	110	140	AAAIDYPITYSQQVRNWISQLQASNIVSTI	SW	0	0	id_50_4909
BKP1_000016	WP_004530059.1 MULTISPECIES: M28 family metallopeptidase [Burkholderia]_132_162	WP_004530059.1	GenBank	132	162	ASNIVSTIVSLSGFTNRYYTTTHGVAASDW	SW	0	0	id_50_4909
BKP1_000017	WP_004530059.1 MULTISPECIES: M28 family metallopeptidase [Burkholderia]_154_184	WP_004530059.1	GenBank	154	184	HGVAASDWIAQQWKQLAGSRTDVTVEQFTH	SW	0	0	id_50_4909
BKP1_000018	WP_004530059.1 MULTISPECIES: M28 family metallopeptidase [Burkholderia]_176_206	WP_004530059.1	GenBank	176	206	VTVEQFTHAGWPQKSVILTIKGSDPAAGVV	SW	0	0	id_50_4909
BKP1_000019	WP_004530059.1 MULTISPECIES: M28 family metallopeptidase [Burkholderia]_198_228	WP_004530059.1	GenBank	198	228	SDPAAGVVVIGGHLDSTVGRMSENTRAPGA	SW	0	0	id_50_4909
BKP1_000020	WP_004530059.1 MULTISPECIES: M28 family metallopeptidase [Burkholderia]_220_250	WP_004530059.1	GenBank	220	250	ENTRAPGADDDASGIASLTEALRVLLANRY	SW	0	0	id_50_4909
BKP1_000021	WP_004530059.1 MULTISPECIES: M28 family metallopeptidase [Burkholderia]_242_272	WP_004530059.1	GenBank	242	272	RVLLANRYQPKRTLKFIGYAAEEAGLLGSQ	SW	0	0	id_50_4909
BKP1_000022	WP_004530059.1 MULTISPECIES: M28 family metallopeptidase [Burkholderia]_264_294	WP_004530059.1	GenBank	264	294	EAGLLGSQAIAKQFRAQNVNVVGAFQLDMT	SW	0	0	id_50_4909
BKP1_000023	WP_004530059.1 MULTISPECIES: M28 family metallopeptidase [Burkholderia]_286_316	WP_004530059.1	GenBank	286	316	GAFQLDMTNYKGDPKDIYLISDYTNATQNT	SW	0	0	id_50_4909
BKP1_000024	WP_004530059.1 MULTISPECIES: M28 family metallopeptidase [Burkholderia]_308_338	WP_004530059.1	GenBank	308	338	YTNATQNTYLANLAKAYLPELAVGTSQSGY	SW	0	1	id_50_4909
BKP1_000025	WP_004530059.1 MULTISPECIES: M28 family metallopeptidase [Burkholderia]_330_360	WP_004530059.1	GenBank	330	360	VGTSQCGYACSDHASWNAQGYPASFPFEAD	SW	2	2	id_50_4909
BKP1_000026	WP_004530059.1 MULTISPECIES: M28 family metallopeptidase [Burkholderia]_352_382	WP_004530059.1	GenBank	352	382	ASFPFEADQNDNPYIHSAYDTLERSDSQGN	SW	0	0	id_50_4909
BKP1_000027	WP_004530059.1 MULTISPECIES: M28 family metallopeptidase [Burkholderia]_374_404	WP_004530059.1	GenBank	374	404	ERSDSQGNHALKFSKLALAYAAELGGGLSA	SW	0	0	id_50_4909
BKP1_000028	WP_004530059.1 MULTISPECIES: M28 family metallopeptidase [Burkholderia]_378_408	WP_004530059.1	GenBank	378	408	SQGNHALKFSKLALAYAAELGGGLSASAKR	SW	0	0	id_50_4909
BKP1_000029	WP_259675827.1 hypothetical protein [Burkholderia pseudomallei]_000_030	WP_259675827.1	GenBank	0	30	MKGRMCPGDAREMFDGADSIKNEHASRKCS	SW	2	2	id_50_12388
BKP1_000030	WP_259675827.1 hypothetical protein [Burkholderia pseudomallei]_022_052	WP_259675827.1	GenBank	22	52	EHASRKSSEDVMLWPADASLDVPGEYAAAR	SW	0	1	id_50_12388
BKP1_000031	WP_259675827.1 hypothetical protein [Burkholderia pseudomallei]_066_096	WP_259675827.1	GenBank	66	96	IALDFPGNDGRAWINRALSSGFDAAVRRGV	SW	0	0	id_50_12388
BKP1_000032	WP_259675827.1 hypothetical protein [Burkholderia pseudomallei]_088_118	WP_259675827.1	GenBank	88	118	DAAVRRGVHPDEGFSGFSGFSDRSDRSDRS	SW	0	0	id_50_12388
BKP1_000033	WP_259675827.1 hypothetical protein [Burkholderia pseudomallei]_129_159	WP_259675827.1	GenBank	129	159	IPRIDRAHSSGSASPSSVDASSDAASMSPR	SW	0	1	id_50_12388
BKP1_000034	WP_270955651.1 hypothetical protein [Burkholderia pseudomallei]_0031	WP_270955651.1	GenBank	29	59	SEDVMLRLADASLDVPGEYAATRAGRANGR	SC	0	0	id_50_12388
BKP1_000035	WP_242686106.1 hypothetical protein [Burkholderia pseudomallei]_0006	WP_242686106.1	GenBank	59	89	HRIVWPAIALDFPPGNDGRALINRALVIGF	SC	0	0	id_50_12388
BKP1_000036	WP_229656806.1 hypothetical protein [Burkholderia pseudomallei]_0047	WP_229656806.1	GenBank	95	125	VHPDEGFSDFSDFSDFSDRSDRSDGSDGSD	SC	0	0	id_50_12388
BKP1_000037	WP_259646669.1 hypothetical protein [Burkholderia pseudomallei]_0061	WP_259646669.1	GenBank	29	59	SEDVMLRPADASLDVPGEYATARAGRANGR	SC	0	0	id_50_12388
BKP1_000038	WP_229656806.1 hypothetical protein [Burkholderia pseudomallei]_0083	WP_229656806.1	GenBank	119	149	GSDGSDGSDGSDGSDGSARDNPIPRIDRAH	SC	0	0	id_50_12388
BKP1_000039	WP_223870977.1 hypothetical protein [Burkholderia pseudomallei]_0011	WP_223870977.1	GenBank	118	148	ARDNPIPRIDRAHSSGSASPSLVDASSDAA	SC	0	0	id_50_12388
BKP1_000040	WP_229656545.1 hypothetical protein [Burkholderia pseudomallei]_0083	WP_229656545.1	GenBank	92	122	RRGVHPDEDFSDFSGFSGFSGFSDRSDRSG	SC	0	0	id_50_12388
BKP1_000041	WP_244382887.1 hypothetical protein [Burkholderia pseudomallei]_0013	WP_244382887.1	GenBank	58	88	RHRIVWPAIALDFPGNDGRALINRVLVIGF	SC	0	0	id_50_12388
BKP1_000042	WP_234711591.1 hypothetical protein [Burkholderia pseudomallei]_0039	WP_234711591.1	GenBank	57	87	GRHRIVWLAIALDFPGNDGRAWINRALVIG	SC	0	0	id_50_12388
BKP1_000043	WP_256730532.1 hypothetical protein [Burkholderia pseudomallei]_0021	WP_256730532.1	GenBank	32	62	VMLWPADASLDVPGEYAAARAGRQTGGIAS	SC	0	0	id_50_12388
BKP1_000044	WP_256732503.1 hypothetical protein [Burkholderia pseudomallei]_0008	WP_256732503.1	GenBank	50	80	ARAGRANGRHRIVWPAIALDFPPLATMGGH	SC	0	0	id_50_12388
BKP1_000045	WP_229656063.1 hypothetical protein [Burkholderia pseudomallei]_0029	WP_229656063.1	GenBank	98	128	DEGFSDFSGFSGFSNRSDRSDRSDRSDGSD	SC	0	0	id_50_12388
BKP1_000046	WP_038754919.1 amino acid adenylation domain-containing protein [Burkholderia pseudomallei]_000_030	WP_038754919.1	GenBank	0	30	MTQSVFARFEQVSRSNAQAVALESAEHRLT	SW	0	1	id_50_353
BKP1_000047	WP_038754919.1 amino acid adenylation domain-containing protein [Burkholderia pseudomallei]_022_052	WP_038754919.1	GenBank	22	52	ESAEHRLTYAQLHDRVASIGARLAAAGVTP	SW	0	0	id_50_353
BKP1_000048	WP_038754919.1 amino acid adenylation domain-containing protein [Burkholderia pseudomallei]_044_074	WP_038754919.1	GenBank	44	74	LAAAGVTPGTLLGIFLPRDVRLPAALLASL	SW	0	0	id_50_353
BKP1_000049	WP_038754919.1 amino acid adenylation domain-containing protein [Burkholderia pseudomallei]_066_096	WP_038754919.1	GenBank	66	96	PAALLASLGSGAVYVPLTEKYPPERLREII	SW	0	0	id_50_353
BKP1_000050	WP_038754919.1 amino acid adenylation domain-containing protein [Burkholderia pseudomallei]_088_118	WP_038754919.1	GenBank	88	118	PERLREIIETHGIEHVVTTEALASQLPASS	SW	0	1	id_50_353
BKP1_000051	WP_038754919.1 amino acid adenylation domain-containing protein [Burkholderia pseudomallei]_1012_1042	WP_038754919.1	GenBank	1012	1042	YDGDVMAGVSANLDRSLAALTGTASERLDA	SW	0	1	id_50_353
BKP1_000052	WP_038754919.1 amino acid adenylation domain-containing protein [Burkholderia pseudomallei]_1034_1064	WP_038754919.1	GenBank	1034	1064	TASERLDAIALPDPLERGAPGGAAAGPADA	SW	0	0	id_50_353
BKP1_000053	WP_038754919.1 amino acid adenylation domain-containing protein [Burkholderia pseudomallei]_1056_1086	WP_038754919.1	GenBank	1056	1086	AAAGPADADAPAAAAADIDLREVVRDIWAS	SW	0	0	id_50_353
BKP1_000054	WP_038754919.1 amino acid adenylation domain-containing protein [Burkholderia pseudomallei]_1078_1108	WP_038754919.1	GenBank	1078	1108	VVRDIWASEVGHRTFGDDDNFFDIGGSSLK	SW	0	0	id_50_353
BKP1_000055	WP_038754919.1 amino acid adenylation domain-containing protein [Burkholderia pseudomallei]_1100_1130	WP_038754919.1	GenBank	1100	1130	DIGGSSLKIMTVYEKLSNFLKRHGIEKEID	SW	0	0	id_50_353
BKP1_000056	WP_038754919.1 amino acid adenylation domain-containing protein [Burkholderia pseudomallei]_110_140	WP_038754919.1	GenBank	110	140	ASQLPASSGKIVLPAEGSETAGPRPAGERA	SW	0	1	id_50_353
BKP1_000057	WP_038754919.1 amino acid adenylation domain-containing protein [Burkholderia pseudomallei]_1122_1152	WP_038754919.1	GenBank	1122	1152	HGIEKEIDIVDLFEHVSVAALTDFLGALIE	SW	0	0	id_50_353
BKP1_000058	WP_038754919.1 amino acid adenylation domain-containing protein [Burkholderia pseudomallei]_1128_1158	WP_038754919.1	GenBank	1128	1158	IDIVDLFEHVSVAALTDFLGALIEHDAIAQ	SW	0	0	id_50_353
BKP1_000059	WP_038754919.1 amino acid adenylation domain-containing protein [Burkholderia pseudomallei]_132_162	WP_038754919.1	GenBank	132	162	PRPAGERADWRPAGERARNAPVYVVFTSGS	SW	0	0	id_50_353
BKP1_000060	WP_038754919.1 amino acid adenylation domain-containing protein [Burkholderia pseudomallei]_154_184	WP_038754919.1	GenBank	154	184	YVVFTSGSTGTPKGVLIGERNLGNLIDWYA	SW	0	0	id_50_353
BKP1_000061	WP_038754919.1 amino acid adenylation domain-containing protein [Burkholderia pseudomallei]_176_206	WP_038754919.1	GenBank	176	206	GNLIDWYAASFSAEQRRSVLASTQITFDLS	SW	0	0	id_50_353
BKP1_000062	WP_038754919.1 amino acid adenylation domain-containing protein [Burkholderia pseudomallei]_198_228	WP_038754919.1	GenBank	198	228	TQITFDLSVFELICTLCTGSKVVIVENVLQ	SW	2	2	id_50_353
BKP1_000063	WP_038754919.1 amino acid adenylation domain-containing protein [Burkholderia pseudomallei]_220_250	WP_038754919.1	GenBank	220	250	VIVENVLQLLDEGAPSDVSLINTVPSAARE	SW	0	1	id_50_353
BKP1_000064	WP_038754919.1 amino acid adenylation domain-containing protein [Burkholderia pseudomallei]_242_272	WP_038754919.1	GenBank	242	272	TVPSAARELVRHRKFPAAARVVNLAGEALY	SW	0	0	id_50_353
BKP1_000065	WP_038754919.1 amino acid adenylation domain-containing protein [Burkholderia pseudomallei]_264_294	WP_038754919.1	GenBank	264	294	NLAGEALYQDLVDDIYEAAPQLEQVFNLYG	SW	0	0	id_50_353
BKP1_000066	WP_038754919.1 amino acid adenylation domain-containing protein [Burkholderia pseudomallei]_286_316	WP_038754919.1	GenBank	286	316	EQVFNLYGPSEDTTYSTGHAVPRGGASRTV	SW	0	0	id_50_353
BKP1_000067	WP_038754919.1 amino acid adenylation domain-containing protein [Burkholderia pseudomallei]_308_338	WP_038754919.1	GenBank	308	338	RGGASRTVSIGRSLPGKRAHILSDALTPVA	SW	0	0	id_50_353
BKP1_000068	WP_038754919.1 amino acid adenylation domain-containing protein [Burkholderia pseudomallei]_330_360	WP_038754919.1	GenBank	330	360	SDALTPVAPGEVGEISLSGEGVALGYLNDA	SW	0	1	id_50_353
BKP1_000069	WP_038754919.1 amino acid adenylation domain-containing protein [Burkholderia pseudomallei]_352_382	WP_038754919.1	GenBank	352	382	ALGYLNDATLTAEKFPTIGHGPLAGERVYR	SW	0	0	id_50_353
BKP1_000070	WP_038754919.1 amino acid adenylation domain-containing protein [Burkholderia pseudomallei]_374_404	WP_038754919.1	GenBank	374	404	LAGERVYRTGDLGSIDGDGLLRYLGRADRQ	SW	0	0	id_50_353
BKP1_000071	WP_038754919.1 amino acid adenylation domain-containing protein [Burkholderia pseudomallei]_396_426	WP_038754919.1	GenBank	396	426	YLGRADRQVKVRGVRIEPGEVEVALRSIDG	SW	0	0	id_50_353
BKP1_000072	WP_038754919.1 amino acid adenylation domain-containing protein [Burkholderia pseudomallei]_418_448	WP_038754919.1	GenBank	418	448	VALRSIDGIADAAVVKIVDAANNDQLVALV	SW	0	0	id_50_353
BKP1_000073	WP_038754919.1 amino acid adenylation domain-containing protein [Burkholderia pseudomallei]_440_470	WP_038754919.1	GenBank	440	470	NDQLVALVVAQPSSPAEHAILDRLQALIPA	SW	0	1	id_50_353
BKP1_000074	WP_038754919.1 amino acid adenylation domain-containing protein [Burkholderia pseudomallei]_462_492	WP_038754919.1	GenBank	462	492	RLQALIPAFMVPSRVERIDAIPLNGNGKTD	SW	0	0	id_50_353
BKP1_000075	WP_038754919.1 amino acid adenylation domain-containing protein [Burkholderia pseudomallei]_484_514	WP_038754919.1	GenBank	484	514	LNGNGKTDRTKLEQIAGALFGAAPPADDIQ	SW	0	0	id_50_353
BKP1_000076	WP_038754919.1 amino acid adenylation domain-containing protein [Burkholderia pseudomallei]_506_536	WP_038754919.1	GenBank	506	536	APPADDIQARVAQIVAKLMSRTDVAADADF	SW	0	0	id_50_353
BKP1_000077	WP_038754919.1 amino acid adenylation domain-containing protein [Burkholderia pseudomallei]_528_558	WP_038754919.1	GenBank	528	558	DVAADADFFRIGGNSLLSAQLTFMLQKQFS	SW	0	0	id_50_353
BKP1_000078	WP_038754919.1 amino acid adenylation domain-containing protein [Burkholderia pseudomallei]_550_580	WP_038754919.1	GenBank	550	580	FMLQKQFSVTLSIADVFRHRTIGALAAIIR	SW	0	0	id_50_353
BKP1_000079	WP_038754919.1 amino acid adenylation domain-containing protein [Burkholderia pseudomallei]_572_602	WP_038754919.1	GenBank	572	602	GALAAIIRERTHKAAQTAPAAAGQQPAAVR	SW	0	0	id_50_353
BKP1_000080	WP_038754919.1 amino acid adenylation domain-containing protein [Burkholderia pseudomallei]_594_624	WP_038754919.1	GenBank	594	624	GQQPAAVRSTSGGAGAGQPVVFATPAQRGI	SW	0	0	id_50_353
BKP1_000081	WP_038754919.1 amino acid adenylation domain-containing protein [Burkholderia pseudomallei]_616_646	WP_038754919.1	GenBank	616	646	ATPAQRGIWLLENSPGGRAVSNAPLVFEYA	SW	0	0	id_50_353
BKP1_000082	WP_038754919.1 amino acid adenylation domain-containing protein [Burkholderia pseudomallei]_638_668	WP_038754919.1	GenBank	638	668	APLVFEYAGTLERALLERSVTQLLERHAIL	SW	0	0	id_50_353
BKP1_000083	WP_038754919.1 amino acid adenylation domain-containing protein [Burkholderia pseudomallei]_660_690	WP_038754919.1	GenBank	660	690	LLERHAILRSNYVWEDGSLRIKSNAPVPFR	SW	0	1	id_50_353
BKP1_000084	WP_038754919.1 amino acid adenylation domain-containing protein [Burkholderia pseudomallei]_682_712	WP_038754919.1	GenBank	682	712	SNAPVPFRVETVDLGSLAPDAQQAKARELV	SW	0	1	id_50_353
BKP1_000085	WP_038754919.1 amino acid adenylation domain-containing protein [Burkholderia pseudomallei]_704_734	WP_038754919.1	GenBank	704	734	QAKARELVAREVMRPFDLRRDPMLRVTDIA	SW	0	0	id_50_353
BKP1_000086	WP_038754919.1 amino acid adenylation domain-containing protein [Burkholderia pseudomallei]_726_756	WP_038754919.1	GenBank	726	756	MLRVTDIAFGERAGQLVFVFHHIAVDDRAL	SW	0	0	id_50_353
BKP1_000087	WP_038754919.1 amino acid adenylation domain-containing protein [Burkholderia pseudomallei]_748_778	WP_038754919.1	GenBank	748	778	IAVDDRALNIVFSELQRLYAAGGDPAAIGA	SW	0	0	id_50_353
BKP1_000088	WP_038754919.1 amino acid adenylation domain-containing protein [Burkholderia pseudomallei]_770_800	WP_038754919.1	GenBank	770	800	GDPAAIGAAPARQFADYAAAAREASARLGE	SW	0	0	id_50_353
BKP1_000089	WP_038754919.1 amino acid adenylation domain-containing protein [Burkholderia pseudomallei]_792_822	WP_038754919.1	GenBank	792	822	EASARLGEHLDYWRHKLADYRGATPYLVDP	SW	0	0	id_50_353
BKP1_000090	WP_038754919.1 amino acid adenylation domain-containing protein [Burkholderia pseudomallei]_814_844	WP_038754919.1	GenBank	814	844	ATPYLVDPQAKPAARFAGRLHLHRVARHVS	SW	0	0	id_50_353
BKP1_000091	WP_038754919.1 amino acid adenylation domain-containing protein [Burkholderia pseudomallei]_836_866	WP_038754919.1	GenBank	836	866	HRVARHVSRQLDAAAARRGLTPFALFAAAV	SW	0	0	id_50_353
BKP1_000092	WP_038754919.1 amino acid adenylation domain-containing protein [Burkholderia pseudomallei]_858_888	WP_038754919.1	GenBank	858	888	FALFAAAVASIVHRASGSDDVTIGTFFSNR	SW	0	1	id_50_353
BKP1_000093	WP_038754919.1 amino acid adenylation domain-containing protein [Burkholderia pseudomallei]_880_910	WP_038754919.1	GenBank	880	910	IGTFFSNRDHFQDNDLVGFFVNTLPLRVRI	SW	0	0	id_50_353
BKP1_000094	WP_038754919.1 amino acid adenylation domain-containing protein [Burkholderia pseudomallei]_902_932	WP_038754919.1	GenBank	902	932	TLPLRVRIDAGWDVDQLAQAMSATLAQAHA	SW	0	0	id_50_353
BKP1_000095	WP_038754919.1 amino acid adenylation domain-containing protein [Burkholderia pseudomallei]_924_954	WP_038754919.1	GenBank	924	954	ATLAQAHAHRDVTTEDVFDALQANNALRRA	SW	0	0	id_50_353
BKP1_000096	WP_038754919.1 amino acid adenylation domain-containing protein [Burkholderia pseudomallei]_946_976	WP_038754919.1	GenBank	946	976	ANNALRRAAFRVMVNLEPEQAEVLTMGALS	SW	0	0	id_50_353
BKP1_000097	WP_038754919.1 amino acid adenylation domain-containing protein [Burkholderia pseudomallei]_968_998	WP_038754919.1	GenBank	968	998	VLTMGALSARRMLLDRHVAKYDLLFSLRKE	SW	0	0	id_50_353
BKP1_000098	WP_038754919.1 amino acid adenylation domain-containing protein [Burkholderia pseudomallei]_990_1020	WP_038754919.1	GenBank	990	1020	LLFSLRKEDGDYRVLVEYNTELYDGDVMAG	SW	0	0	id_50_353
BKP1_000099	tr|A3NH48|A3NH48_BURP6 ADP-heptose:LPS heptosyltransferase OS=Burkholderia pseudomallei (strain 668) OX=320373 GN=BURPS668_A0670 PE=4 SV=1_000_030	A3NH48	Uniprot	0	30	MPHPKRALGRTPTRVLIIKLSAMGDSLSLF	SW	0	1	id_50_5389
BKP1_000100	tr|A3NH48|A3NH48_BURP6 ADP-heptose:LPS heptosyltransferase OS=Burkholderia pseudomallei (strain 668) OX=320373 GN=BURPS668_A0670 PE=4 SV=1_022_052	A3NH48	Uniprot	22	52	MGDSLSLFPTVRQLALAFPGATIDWLTSNR	SW	0	1	id_50_5389
BKP1_000101	tr|A3NH48|A3NH48_BURP6 ADP-heptose:LPS heptosyltransferase OS=Burkholderia pseudomallei (strain 668) OX=320373 GN=BURPS668_A0670 PE=4 SV=1_044_074	A3NH48	Uniprot	44	74	IDWLTSNRSNPALFAELPFIRTIFVTPPSL	SW	0	0	id_50_5389
BKP1_000102	tr|A3NH48|A3NH48_BURP6 ADP-heptose:LPS heptosyltransferase OS=Burkholderia pseudomallei (strain 668) OX=320373 GN=BURPS668_A0670 PE=4 SV=1_066_096	A3NH48	Uniprot	66	96	IFVTPPSLVRALTYLGGWLFRARRYDLTID	SW	0	0	id_50_5389
BKP1_000103	tr|A3NH48|A3NH48_BURP6 ADP-heptose:LPS heptosyltransferase OS=Burkholderia pseudomallei (strain 668) OX=320373 GN=BURPS668_A0670 PE=4 SV=1_088_118	A3NH48	Uniprot	88	118	RRYDLTIDYDQYYCISELIAGMSACSAGFR	SW	2	2	id_50_5389
BKP1_000104	tr|A3NH48|A3NH48_BURP6 ADP-heptose:LPS heptosyltransferase OS=Burkholderia pseudomallei (strain 668) OX=320373 GN=BURPS668_A0670 PE=4 SV=1_110_140	A3NH48	Uniprot	110	140	SASSAGFRTSLKGTTFSLSVEYDPLLNEKA	SW	0	1	id_50_5389
BKP1_000105	tr|A3NH48|A3NH48_BURP6 ADP-heptose:LPS heptosyltransferase OS=Burkholderia pseudomallei (strain 668) OX=320373 GN=BURPS668_A0670 PE=4 SV=1_132_162	A3NH48	Uniprot	132	162	DPLLNEKAMFRKLTERVFATYGVSIPDYRA	SW	0	0	id_50_5389
BKP1_000106	tr|A3NH48|A3NH48_BURP6 ADP-heptose:LPS heptosyltransferase OS=Burkholderia pseudomallei (strain 668) OX=320373 GN=BURPS668_A0670 PE=4 SV=1_154_184	A3NH48	Uniprot	154	184	VSIPDYRAELPELIERFVPSAQLQTLRARL	SW	0	0	id_50_5389
BKP1_000107	tr|A3NH48|A3NH48_BURP6 ADP-heptose:LPS heptosyltransferase OS=Burkholderia pseudomallei (strain 668) OX=320373 GN=BURPS668_A0670 PE=4 SV=1_176_206	A3NH48	Uniprot	176	206	LQTLRARLKAQGKPIVGIYPGSGANATFRR	SW	0	0	id_50_5389
BKP1_000108	tr|A3NH48|A3NH48_BURP6 ADP-heptose:LPS heptosyltransferase OS=Burkholderia pseudomallei (strain 668) OX=320373 GN=BURPS668_A0670 PE=4 SV=1_198_228	A3NH48	Uniprot	198	228	GANATFRRWGVGNYVALIERYKDRYAFVLL	SW	0	0	id_50_5389
BKP1_000109	tr|A3NH48|A3NH48_BURP6 ADP-heptose:LPS heptosyltransferase OS=Burkholderia pseudomallei (strain 668) OX=320373 GN=BURPS668_A0670 PE=4 SV=1_220_250	A3NH48	Uniprot	220	250	DRYAFVLLGGPDERDLQADLKDIDGVFNLI	SW	0	0	id_50_5389
BKP1_000110	tr|A3NH48|A3NH48_BURP6 ADP-heptose:LPS heptosyltransferase OS=Burkholderia pseudomallei (strain 668) OX=320373 GN=BURPS668_A0670 PE=4 SV=1_242_272	A3NH48	Uniprot	242	272	IDGVFNLIDSMSLKEVAWFLKHTIDLLVGN	SW	0	0	id_50_5389
BKP1_000111	tr|A3NH48|A3NH48_BURP6 ADP-heptose:LPS heptosyltransferase OS=Burkholderia pseudomallei (strain 668) OX=320373 GN=BURPS668_A0670 PE=4 SV=1_264_294	A3NH48	Uniprot	264	294	TIDLLVGNDGGLLHVAESQAVATVGIFGPA	SW	0	0	id_50_5389
BKP1_000112	tr|A3NH48|A3NH48_BURP6 ADP-heptose:LPS heptosyltransferase OS=Burkholderia pseudomallei (strain 668) OX=320373 GN=BURPS668_A0670 PE=4 SV=1_286_316	A3NH48	Uniprot	286	316	TVGIFGPALYRKWGSSLERSIGVEKELPSR	SW	0	1	id_50_5389
BKP1_000113	tr|A3NH48|A3NH48_BURP6 ADP-heptose:LPS heptosyltransferase OS=Burkholderia pseudomallei (strain 668) OX=320373 GN=BURPS668_A0670 PE=4 SV=1_308_338	A3NH48	Uniprot	308	338	VEKELPCRPCLKNYLGTVPSACCLGTTACL	SW	5	5	id_50_5389
BKP1_000114	tr|A3NH48|A3NH48_BURP6 ADP-heptose:LPS heptosyltransferase OS=Burkholderia pseudomallei (strain 668) OX=320373 GN=BURPS668_A0670 PE=4 SV=1_330_360	A3NH48	Uniprot	330	360	CLGTTACLSAISTDDVAQAMHRAVHRIHVV	SW	2	2	id_50_5389
BKP1_000115	tr|A3NH48|A3NH48_BURP6 ADP-heptose:LPS heptosyltransferase OS=Burkholderia pseudomallei (strain 668) OX=320373 GN=BURPS668_A0670 PE=4 SV=1_335_365	A3NH48	Uniprot	335	365	ASLSAISTDDVAQAMHRAVHRIHVVPIAHA	SW	0	1	id_50_5389
BKP1_000116	WP_259675822.1 hypothetical protein, partial [Burkholderia pseudomallei]_000_030	WP_259675822.1	GenBank	0	30	TIVAFTRLRRDCRQRVSKRSQPIPEQCPKL	SW	2	2	id_50_13908
BKP1_000117	WP_259675822.1 hypothetical protein, partial [Burkholderia pseudomallei]_022_052	WP_259675822.1	GenBank	22	52	IPEQSPKLLDHFRRRGAERGRDRAPPSDRR	SW	0	1	id_50_13908
BKP1_000118	WP_259675822.1 hypothetical protein, partial [Burkholderia pseudomallei]_044_074	WP_259675822.1	GenBank	44	74	RAPPSDRRSAALAAARTSRAARTQHRAAAA	SW	0	1	id_50_13908
BKP1_000119	WP_259675822.1 hypothetical protein, partial [Burkholderia pseudomallei]_088_118	WP_259675822.1	GenBank	88	118	DARPLAEPFREGSYNIALSAGAPAGRSLAR	SW	0	1	id_50_13908
BKP1_000120	WP_259675822.1 hypothetical protein, partial [Burkholderia pseudomallei]_110_140	WP_259675822.1	GenBank	110	140	PAGRSLARGPDGLKRRRRPAARRGFMFIPK	SW	0	0	id_50_13908
BKP1_000121	WP_259675822.1 hypothetical protein, partial [Burkholderia pseudomallei]_130_160	WP_259675822.1	GenBank	130	160	ARRGFMFIPKWVAPSVSRASRPSWMSRRAF	SW	0	1	id_50_13908
BKP1_000122	tr|C4KTI8|C4KTI8_BURPE ATP-dependent RNA helicase RhlE OS=Burkholderia pseudomallei MSHR346 OX=536230 GN=GBP346_A1219 PE=4 SV=1_0024	C4KTI8	Uniprot	10	40	RTQHRAAAVARMAGFGGPAAWIADARPLAE	SC	0	0	id_50_13908
BKP1_000123	tr|A3N7C0|A3N7C0_BURP6 Uncharacterized protein OS=Burkholderia pseudomallei (strain 668) OX=320373 GN=BURPS668_1192 PE=4 SV=1_0062	A3N7C0	Uniprot	67	97	LKRRRRPAARRGFVFIPKWVAPPVSRASRP	SC	0	0	id_50_13908
BKP1_000124	WP_076896130.1 RNA helicase, partial [Burkholderia pseudomallei]_0022	WP_076896130.1	GenBank	0	30	RAGARPPGARGGRRAAVGIGGAAARIADAR	SC	0	0	id_50_13908
BKP1_000125	WP_004266908.1 GNAT family N-acetyltransferase [Burkholderia pseudomallei]_000_030	WP_004266908.1	GenBank	0	30	MRPRSGWFGGGGEVSASMMRALAWFGDSAE	SW	0	1	id_50_526
BKP1_000126	WP_004266908.1 GNAT family N-acetyltransferase [Burkholderia pseudomallei]_022_052	WP_004266908.1	GenBank	22	52	AWFGDSAERHIGGARSFAYPMGTRARSGVA	SW	0	1	id_50_526
BKP1_000127	WP_004266908.1 GNAT family N-acetyltransferase [Burkholderia pseudomallei]_044_074	WP_004266908.1	GenBank	44	74	TRARSGVAARRSPSLNPFSGVAVTVRNLDA	SW	0	0	id_50_526
BKP1_000128	WP_004266908.1 GNAT family N-acetyltransferase [Burkholderia pseudomallei]_066_096	WP_004266908.1	GenBank	66	96	VTVRNLDALFHPTSVAVVGASPRPGSVGAM	SW	0	0	id_50_526
BKP1_000129	WP_004266908.1 GNAT family N-acetyltransferase [Burkholderia pseudomallei]_088_118	WP_004266908.1	GenBank	88	118	RPGSVGAMVWASVLDGRFGGAIWPVNPKYG	SW	0	1	id_50_526
BKP1_000130	WP_004266908.1 GNAT family N-acetyltransferase [Burkholderia pseudomallei]_110_140	WP_004266908.1	GenBank	110	140	WPVNPKYGELNGHKVYPYVDQLPSAPSVAL	SW	0	0	id_50_526
BKP1_000131	WP_004266908.1 GNAT family N-acetyltransferase [Burkholderia pseudomallei]_132_162	WP_004266908.1	GenBank	132	162	PSAPSVALISTPPATWPGIVRKLGGLGVRA	SW	0	1	id_50_526
BKP1_000132	WP_004266908.1 GNAT family N-acetyltransferase [Burkholderia pseudomallei]_154_184	WP_004266908.1	GenBank	154	184	LGGLGVRAAIIVGEARSGADRAALERALAA	SW	0	0	id_50_526
BKP1_000133	WP_004266908.1 GNAT family N-acetyltransferase [Burkholderia pseudomallei]_176_206	WP_004266908.1	GenBank	176	206	ALERALAAAKPYLLRVVGPGSLGVVSPALG	SW	0	0	id_50_526
BKP1_000134	WP_004266908.1 GNAT family N-acetyltransferase [Burkholderia pseudomallei]_198_228	WP_004266908.1	GenBank	198	228	GVVSPALGAHFGAPASIVKAGGVAWVSQSN	SW	0	1	id_50_526
BKP1_000135	WP_004266908.1 GNAT family N-acetyltransferase [Burkholderia pseudomallei]_220_250	WP_004266908.1	GenBank	220	250	VAWVSQSNALTNAVLGWAHARGLGFSHAVA	SW	0	0	id_50_526
BKP1_000136	WP_004266908.1 GNAT family N-acetyltransferase [Burkholderia pseudomallei]_242_272	WP_004266908.1	GenBank	242	272	LGFSHAVALGGEADVDAADVLDYLASDAET	SW	0	0	id_50_526
BKP1_000137	WP_004266908.1 GNAT family N-acetyltransferase [Burkholderia pseudomallei]_264_294	WP_004266908.1	GenBank	264	294	YLASDAETRAILLELDTVKSARKFMSAARA	SW	0	0	id_50_526
BKP1_000138	WP_004266908.1 GNAT family N-acetyltransferase [Burkholderia pseudomallei]_286_316	WP_004266908.1	GenBank	286	316	KFMSAARAAARNKPVLALRAGRGDSGDLLY	SW	0	0	id_50_526
BKP1_000139	WP_004266908.1 GNAT family N-acetyltransferase [Burkholderia pseudomallei]_308_338	WP_004266908.1	GenBank	308	338	GDSGDLLYTAAFQRAGMVRVDALDDLLDEI	SW	0	0	id_50_526
BKP1_000140	WP_004266908.1 GNAT family N-acetyltransferase [Burkholderia pseudomallei]_330_360	WP_004266908.1	GenBank	330	360	LDDLLDEIEALGVGRAAATSGGVTLVTSDR	SW	0	0	id_50_526
BKP1_000141	WP_004266908.1 GNAT family N-acetyltransferase [Burkholderia pseudomallei]_352_382	WP_004266908.1	GenBank	352	382	VTLVTSDRGVAKLAVDALAAAGETLAQWPR	SW	0	0	id_50_526
BKP1_000142	WP_004266908.1 GNAT family N-acetyltransferase [Burkholderia pseudomallei]_374_404	WP_004266908.1	GenBank	374	404	ETLAQWPRAAVDEVGGALPAGIVAGNPLLL	SW	0	0	id_50_526
BKP1_000143	WP_004266908.1 GNAT family N-acetyltransferase [Burkholderia pseudomallei]_396_426	WP_004266908.1	GenBank	396	426	VAGNPLLLGDDARPEYFGAALKALAQHPPT	SW	0	0	id_50_526
BKP1_000144	WP_004266908.1 GNAT family N-acetyltransferase [Burkholderia pseudomallei]_418_448	WP_004266908.1	GenBank	418	448	ALAQHPPTGTVFVVHATSHSAPAVDVARVL	SW	0	0	id_50_526
BKP1_000145	WP_004266908.1 GNAT family N-acetyltransferase [Burkholderia pseudomallei]_440_470	WP_004266908.1	GenBank	440	470	AVDVARVLIESRKFARRGMLASFFGGVDAA	SW	0	1	id_50_526
BKP1_000146	WP_004266908.1 GNAT family N-acetyltransferase [Burkholderia pseudomallei]_462_492	WP_004266908.1	GenBank	462	492	FFGGVDAATRDALHVHGIPVHTTPQRLARA	SW	0	0	id_50_526
BKP1_000147	WP_004266908.1 GNAT family N-acetyltransferase [Burkholderia pseudomallei]_484_514	WP_004266908.1	GenBank	484	514	TPQRLARAHARLVDYQLGRELLMQTPEGTP	SW	0	0	id_50_526
BKP1_000148	WP_004266908.1 GNAT family N-acetyltransferase [Burkholderia pseudomallei]_506_536	WP_004266908.1	GenBank	506	536	MQTPEGTPPQPAASISAARHTARAALAQGR	SW	0	0	id_50_526
BKP1_000149	WP_004266908.1 GNAT family N-acetyltransferase [Burkholderia pseudomallei]_528_558	WP_004266908.1	GenBank	528	558	RAALAQGRDGFEGDAALEWLAGFGIERATD	SW	0	0	id_50_526
BKP1_000150	WP_004266908.1 GNAT family N-acetyltransferase [Burkholderia pseudomallei]_550_580	WP_004266908.1	GenBank	550	580	FGIERATDADVDMGDTIVDITVGMYDDPNF	SW	0	0	id_50_526
BKP1_000151	WP_004266908.1 GNAT family N-acetyltransferase [Burkholderia pseudomallei]_572_602	WP_004266908.1	GenBank	572	602	GMYDDPNFGPVFRYSVPPADGVSAPFVVYG	SW	0	0	id_50_526
BKP1_000152	WP_004266908.1 GNAT family N-acetyltransferase [Burkholderia pseudomallei]_594_624	WP_004266908.1	GenBank	594	624	SAPFVVYGLPPFNTVLARAVVARSPYAHRA	SW	0	0	id_50_526
BKP1_000153	WP_004266908.1 GNAT family N-acetyltransferase [Burkholderia pseudomallei]_616_646	WP_004266908.1	GenBank	616	646	RSPYAHRAPPEPLLQALTALSQAVSDVREI	SW	0	1	id_50_526
BKP1_000154	WP_004266908.1 GNAT family N-acetyltransferase [Burkholderia pseudomallei]_638_668	WP_004266908.1	GenBank	638	668	AVSDVREIVEMSLVLRVRPTRVVALGPHIR	SW	0	1	id_50_526
BKP1_000155	WP_004266908.1 GNAT family N-acetyltransferase [Burkholderia pseudomallei]_660_690	WP_004266908.1	GenBank	660	690	VALGPHIRLATGRSRLAIVPYPRYLEQQLD	SW	0	0	id_50_526
BKP1_000156	WP_004266908.1 GNAT family N-acetyltransferase [Burkholderia pseudomallei]_682_712	WP_004266908.1	GenBank	682	712	RYLEQQLDWRGERITVRPIRPEDEAAHREL	SW	0	0	id_50_526
BKP1_000157	WP_004266908.1 GNAT family N-acetyltransferase [Burkholderia pseudomallei]_704_734	WP_004266908.1	GenBank	704	734	DEAAHRELLSAMTPDDLRMRFFGAIRNFDH	SW	0	0	id_50_526
BKP1_000158	WP_004266908.1 GNAT family N-acetyltransferase [Burkholderia pseudomallei]_726_756	WP_004266908.1	GenBank	726	756	GAIRNFDHSQIARMTQIDYDREMALIATLD	SW	0	0	id_50_526
BKP1_000159	WP_004266908.1 GNAT family N-acetyltransferase [Burkholderia pseudomallei]_748_778	WP_004266908.1	GenBank	748	778	MALIATLDDADGRAHTLGAVRAVTDPDNEA	SW	0	0	id_50_526
BKP1_000160	WP_004266908.1 GNAT family N-acetyltransferase [Burkholderia pseudomallei]_770_800	WP_004266908.1	GenBank	770	800	VTDPDNEATEFAIAVRPDQKGKGLGRMLMT	SW	0	0	id_50_526
BKP1_000161	WP_004266908.1 GNAT family N-acetyltransferase [Burkholderia pseudomallei]_792_822	WP_004266908.1	GenBank	792	822	GLGRMLMTRIIDYARSRGTAWMIGEALREN	SW	0	0	id_50_526
BKP1_000162	WP_004266908.1 GNAT family N-acetyltransferase [Burkholderia pseudomallei]_814_844	WP_004266908.1	GenBank	814	844	IGEALRENTAMISLAKDSGFAVSSTEEPGV	SW	0	0	id_50_526
BKP1_000163	WP_004266908.1 GNAT family N-acetyltransferase [Burkholderia pseudomallei]_823_853	WP_004266908.1	GenBank	823	853	AMISLAKDSGFAVSSTEEPGVVAFRLKLQP	SW	0	0	id_50_526
BKP1_000164	tr|A0A2K9DD95|A0A2K9DD95_BURPE Uncharacterized protein OS=Burkholderia pseudomallei OX=28450 GN=CXQ84_21355 PE=4 SV=1_000_030	A0A2K9DD95	Uniprot	0	30	MADVQPARGEARARMRRPGSRARRVARRSR	SW	0	1	id_50_18228
BKP1_000165	tr|A0A2K9DD95|A0A2K9DD95_BURPE Uncharacterized protein OS=Burkholderia pseudomallei OX=28450 GN=CXQ84_21355 PE=4 SV=1_022_052	A0A2K9DD95	Uniprot	22	52	RRVARRCRCVAAVAHAGQPMVERRVDTGGG	SW	2	2	id_50_18228
BKP1_000166	tr|A0A2K9DD95|A0A2K9DD95_BURPE Uncharacterized protein OS=Burkholderia pseudomallei OX=28450 GN=CXQ84_21355 PE=4 SV=1_044_074	A0A2K9DD95	Uniprot	44	74	RRVDTGGGSHGQSQSRRGWRQDMKKILVAM	SW	0	0	id_50_18228
BKP1_000167	tr|A0A2K9DD95|A0A2K9DD95_BURPE Uncharacterized protein OS=Burkholderia pseudomallei OX=28450 GN=CXQ84_21355 PE=4 SV=1_071_101	A0A2K9DD95	Uniprot	71	101	VAMLALGVLIGVVAIVSICVAWTLADRLCY	SW	2	2	id_50_18228
BKP1_000168	WP_028200899.1 hypothetical protein [Burkholderia pseudomallei]_0009	WP_028200899.1	GenBank	3	33	RRADTGGGSHGQSQSRRGWRQNMKKILVAM	SC	0	0	id_50_18228
BKP1_000169	WP_038778217.1 hypothetical protein [Burkholderia pseudomallei]_0004	WP_038778217.1	GenBank	12	42	HGQSQSRRRWRQNMKKILVAMLALGVLIGV	SC	0	0	id_50_18228
BKP1_000170	WP_038762414.1 molybdopterin molybdotransferase MoeA [Burkholderia pseudomallei]_000_030	WP_038762414.1	GenBank	0	30	MTTHTTPTPSATSGHTVALSVDEARALALR	SW	0	0	id_50_4396
BKP1_000171	WP_038762414.1 molybdopterin molybdotransferase MoeA [Burkholderia pseudomallei]_022_052	WP_038762414.1	GenBank	22	52	EARALALRFAERVAQVERVALRDALGRVLA	SW	0	0	id_50_4396
BKP1_000172	WP_038762414.1 molybdopterin molybdotransferase MoeA [Burkholderia pseudomallei]_044_074	WP_038762414.1	GenBank	44	74	DALGRVLAEDVASPFDIPAYDNAAMDGYAF	SW	0	0	id_50_4396
BKP1_000173	WP_038762414.1 molybdopterin molybdotransferase MoeA [Burkholderia pseudomallei]_066_096	WP_038762414.1	GenBank	66	96	AAMDGYAFDGAALAAPAADGVLALAVAGRA	SW	0	0	id_50_4396
BKP1_000174	WP_038762414.1 molybdopterin molybdotransferase MoeA [Burkholderia pseudomallei]_088_118	WP_038762414.1	GenBank	88	118	ALAVAGRALAGHPFDGPRIAPHASVRIMTG	SW	0	0	id_50_4396
BKP1_000175	WP_038762414.1 molybdopterin molybdotransferase MoeA [Burkholderia pseudomallei]_110_140	WP_038762414.1	GenBank	110	140	ASVRIMTGAQMPAGSDTVIPQEKVDATGDV	SW	0	1	id_50_4396
BKP1_000176	WP_038762414.1 molybdopterin molybdotransferase MoeA [Burkholderia pseudomallei]_132_162	WP_038762414.1	GenBank	132	162	KVDATGDVVRFPAAAVARGEHSRRAGEDLA	SW	0	0	id_50_4396
BKP1_000177	WP_038762414.1 molybdopterin molybdotransferase MoeA [Burkholderia pseudomallei]_154_184	WP_038762414.1	GenBank	154	184	RRAGEDLARGARALAAGRVVRAADLGLLAS	SW	0	0	id_50_4396
BKP1_000178	WP_038762414.1 molybdopterin molybdotransferase MoeA [Burkholderia pseudomallei]_176_206	WP_038762414.1	GenBank	176	206	ADLGLLASLGIAEVAVRRRVRVAFFSTGDE	SW	0	0	id_50_4396
BKP1_000179	WP_038762414.1 molybdopterin molybdotransferase MoeA [Burkholderia pseudomallei]_198_228	WP_038762414.1	GenBank	198	228	AFFSTGDELQTPGEPPREGGLYDSNRATLA	SW	0	0	id_50_4396
BKP1_000180	WP_038762414.1 molybdopterin molybdotransferase MoeA [Burkholderia pseudomallei]_220_250	WP_038762414.1	GenBank	220	250	DSNRATLAGMLARIGVETLDLGIVRDDPAA	SW	0	0	id_50_4396
BKP1_000181	WP_038762414.1 molybdopterin molybdotransferase MoeA [Burkholderia pseudomallei]_242_272	WP_038762414.1	GenBank	242	272	IVRDDPAALEGALTTAAAQADAVITSGGVS	SW	0	0	id_50_4396
BKP1_000182	WP_038762414.1 molybdopterin molybdotransferase MoeA [Burkholderia pseudomallei]_264_294	WP_038762414.1	GenBank	264	294	VITSGGVSVGDADFTRALLATLGDVTFASV	SW	0	0	id_50_4396
BKP1_000183	WP_038762414.1 molybdopterin molybdotransferase MoeA [Burkholderia pseudomallei]_286_316	WP_038762414.1	GenBank	286	316	GDVTFASVAMRPGRPLASGRIRASGREERP	SW	0	1	id_50_4396
BKP1_000184	WP_038762414.1 molybdopterin molybdotransferase MoeA [Burkholderia pseudomallei]_308_338	WP_038762414.1	GenBank	308	338	ASGREERPALFFGLPGNPVAVAATFIVIVR	SW	0	0	id_50_4396
BKP1_000185	WP_038762414.1 molybdopterin molybdotransferase MoeA [Burkholderia pseudomallei]_330_360	WP_038762414.1	GenBank	330	360	ATFIVIVRDALFAMMGAEAQPLPRYPAVSD	SW	0	0	id_50_4396
BKP1_000186	WP_038762414.1 molybdopterin molybdotransferase MoeA [Burkholderia pseudomallei]_352_382	WP_038762414.1	GenBank	352	382	PRYPAVSDAPINKRAGRTEYLRGRAARDAS	SW	0	1	id_50_4396
BKP1_000187	WP_038762414.1 molybdopterin molybdotransferase MoeA [Burkholderia pseudomallei]_374_404	WP_038762414.1	GenBank	374	404	GRAARDASGVWRVAPAGSQSSASLKSLSDA	SW	0	0	id_50_4396
BKP1_000188	WP_038762414.1 molybdopterin molybdotransferase MoeA [Burkholderia pseudomallei]_396_426	WP_038762414.1	GenBank	396	426	SLKSLSDANSFIVLAHDAARVDAGTTVDIL	SW	0	1	id_50_4396
BKP1_000189	WP_038762414.1 molybdopterin molybdotransferase MoeA [Burkholderia pseudomallei]_402_432	WP_038762414.1	GenBank	402	432	DANSFIVLAHDAARVDAGTTVDILPFDGAI	SW	0	0	id_50_4396
BKP1_000190	WP_004531523.1 MULTISPECIES: type VI secretion system baseplate subunit TssK [Burkholderia]_000_030	WP_004531523.1	GenBank	0	30	MSWHNKVVWSEGLFMRPQLFQQQERYLEHY	SW	0	0	id_50_3605
BKP1_000191	WP_004531523.1 MULTISPECIES: type VI secretion system baseplate subunit TssK [Burkholderia]_022_052	WP_004531523.1	GenBank	22	52	QERYLEHYAHKRAAPLSPFFFGFSHFSLDS	SW	0	0	id_50_3605
BKP1_000192	WP_004531523.1 MULTISPECIES: type VI secretion system baseplate subunit TssK [Burkholderia]_044_074	WP_004531523.1	GenBank	44	74	FSHFSLDSEAPALGKIIVKSASGVFADGTP	SW	0	0	id_50_3605
BKP1_000193	WP_004531523.1 MULTISPECIES: type VI secretion system baseplate subunit TssK [Burkholderia]_066_096	WP_004531523.1	GenBank	66	96	GVFADGTPFDAPGSTPPPAPLTIRPEHLDQ	SW	0	0	id_50_3605
BKP1_000194	WP_004531523.1 MULTISPECIES: type VI secretion system baseplate subunit TssK [Burkholderia]_088_118	WP_004531523.1	GenBank	88	118	IRPEHLDQVIYLAVPIRVPNGEETAFDRAA	SW	0	0	id_50_3605
BKP1_000195	WP_004531523.1 MULTISPECIES: type VI secretion system baseplate subunit TssK [Burkholderia]_110_140	WP_004531523.1	GenBank	110	140	ETAFDRAAESLARYAVFETDLRDTNSIGQG	SW	0	0	id_50_3605
BKP1_000196	WP_004531523.1 MULTISPECIES: type VI secretion system baseplate subunit TssK [Burkholderia]_132_162	WP_004531523.1	GenBank	132	162	DTNSIGQGPKTVQLSNLRLRLLPEKELTDA	SW	0	0	id_50_3605
BKP1_000197	WP_004531523.1 MULTISPECIES: type VI secretion system baseplate subunit TssK [Burkholderia]_154_184	WP_004531523.1	GenBank	154	184	PEKELTDAWIGLALTRVKTIRADASIELDD	SW	0	0	id_50_3605
BKP1_000198	WP_004531523.1 MULTISPECIES: type VI secretion system baseplate subunit TssK [Burkholderia]_176_206	WP_004531523.1	GenBank	176	206	DASIELDDMLIPPVVGYGASDTLASWLAKI	SW	0	0	id_50_3605
BKP1_000199	WP_004531523.1 MULTISPECIES: type VI secretion system baseplate subunit TssK [Burkholderia]_198_228	WP_004531523.1	GenBank	198	228	LASWLAKIHDLTRLRANALAERLTGSDGRA	SW	0	0	id_50_3605
BKP1_000200	WP_004531523.1 MULTISPECIES: type VI secretion system baseplate subunit TssK [Burkholderia]_220_250	WP_004531523.1	GenBank	220	250	LTGSDGRAGTTAEVSDYLLLQTLNRYEPLL	SW	0	0	id_50_3605
BKP1_000201	WP_004531523.1 MULTISPECIES: type VI secretion system baseplate subunit TssK [Burkholderia]_242_272	WP_004531523.1	GenBank	242	272	LNRYEPLLKHLQRVPTTSPAELYALLIGMA	SW	0	0	id_50_3605
BKP1_000202	WP_004531523.1 MULTISPECIES: type VI secretion system baseplate subunit TssK [Burkholderia]_264_294	WP_004531523.1	GenBank	264	294	YALLIGMAGELSTYVRTDTRRPLDTHPPYQ	SW	0	0	id_50_3605
BKP1_000203	WP_004531523.1 MULTISPECIES: type VI secretion system baseplate subunit TssK [Burkholderia]_286_316	WP_004531523.1	GenBank	286	316	LDTHPPYQHVAPHLSLKPVVDDTHRLLNAV	SW	0	0	id_50_3605
BKP1_000204	WP_004531523.1 MULTISPECIES: type VI secretion system baseplate subunit TssK [Burkholderia]_308_338	WP_004531523.1	GenBank	308	338	THRLLNAVLVRSAQRLALADLGHGMLNAVV	SW	0	0	id_50_3605
BKP1_000205	WP_004531523.1 MULTISPECIES: type VI secretion system baseplate subunit TssK [Burkholderia]_330_360	WP_004531523.1	GenBank	330	360	HGMLNAVVDPVDMQGFTAVVLAVHAQMPPD	SW	0	0	id_50_3605
BKP1_000206	WP_004531523.1 MULTISPECIES: type VI secretion system baseplate subunit TssK [Burkholderia]_352_382	WP_004531523.1	GenBank	352	382	VHAQMPPDLLQQQFAAQAKAGPSERLPDLV	SW	0	0	id_50_3605
BKP1_000207	WP_004531523.1 MULTISPECIES: type VI secretion system baseplate subunit TssK [Burkholderia]_374_404	WP_004531523.1	GenBank	374	404	SERLPDLVRSHLSGIALQALPVPPRQIPFN	SW	0	0	id_50_3605
BKP1_000208	WP_004531523.1 MULTISPECIES: type VI secretion system baseplate subunit TssK [Burkholderia]_396_426	WP_004531523.1	GenBank	396	426	PPRQIPFNAGYVYYELARGGPLWDEVARHG	SW	0	0	id_50_3605
BKP1_000209	WP_038779815.1 type VI secretion system baseplate subunit TssK [Burkholderia pseudomallei]_0264	WP_038779815.1	GenBank	418	448	WDEVARHGGLALHIAGEFPSLKLELWGIRG	SC	0	0	id_50_3605
BKP1_000210	WP_122828771.1 type VI secretion system baseplate subunit TssK [Burkholderia pseudomallei]_0394	WP_122828771.1	GenBank	18	48	LFQQQERYFEYFAHKRAAVLSPFFWGFSRY	SC	0	0	id_50_3605
BKP1_000211	WP_122828771.1 type VI secretion system baseplate subunit TssK [Burkholderia pseudomallei]_0253	WP_122828771.1	GenBank	72	102	TPFDVPGHTPPPPPLTIAAEHQDQVIYLAV	SC	0	0	id_50_3605
BKP1_000212	WP_122828771.1 type VI secretion system baseplate subunit TssK [Burkholderia pseudomallei]_0238	WP_122828771.1	GenBank	50	80	DQESLSFGKLVFKSGAGIFPDGTPFDVPGH	SC	0	0	id_50_3605
BKP1_000213	WP_122828771.1 type VI secretion system baseplate subunit TssK [Burkholderia pseudomallei]_0304	WP_122828771.1	GenBank	352	382	VGAQMSPDVLQQQFASQTKISHPQRLPELI	SC	0	0	id_50_3605
BKP1_000214	WP_122828771.1 type VI secretion system baseplate subunit TssK [Burkholderia pseudomallei]_0130	WP_122828771.1	GenBank	120	150	LARYSAFEIELRDSNAIGQGPKPVQLANMR	SC	0	0	id_50_3605
BKP1_000215	WP_122828771.1 type VI secretion system baseplate subunit TssK [Burkholderia pseudomallei]_0204	WP_122828771.1	GenBank	280	310	RPQTRRPRPTPGYDHAQLYASIRPLVDEVH	SC	0	0	id_50_3605
BKP1_000216	WP_122828771.1 type VI secretion system baseplate subunit TssK [Burkholderia pseudomallei]_0307	WP_122828771.1	GenBank	396	426	PPRQIPFNSSYIYYELSRTGPFWEQIAQQG	SC	0	0	id_50_3605
BKP1_000217	WP_122828771.1 type VI secretion system baseplate subunit TssK [Burkholderia pseudomallei]_0312	WP_122828771.1	GenBank	155	185	EKELTQSWIGIALTRVKTLHADGSVALYDG	SC	0	0	id_50_3605
BKP1_000218	WP_038791298.1 type VI secretion system baseplate subunit TssK [Burkholderia pseudomallei]_0311	WP_038791298.1	GenBank	419	449	EQIAQQGGLAMHIAGHFPELKLELWGVRHK	SC	0	0	id_50_3605
BKP1_000219	WP_122828771.1 type VI secretion system baseplate subunit TssK [Burkholderia pseudomallei]_0012	WP_122828771.1	GenBank	198	228	LLREWATQLHGLAKLRADALATRLSGSDGR	SC	0	0	id_50_3605
BKP1_000220	WP_122828771.1 type VI secretion system baseplate subunit TssK [Burkholderia pseudomallei]_0155	WP_122828771.1	GenBank	308	338	VHYLLNQVLIRGAQPIPLTEQPHGIRVATM	SC	0	0	id_50_3605
BKP1_000221	WP_122828771.1 type VI secretion system baseplate subunit TssK [Burkholderia pseudomallei]_0254	WP_122828771.1	GenBank	330	360	HGIRVATMLPSELAGYSSLVLAVGAQMSPD	SC	0	0	id_50_3605
BKP1_000222	WP_122828771.1 type VI secretion system baseplate subunit TssK [Burkholderia pseudomallei]_0191	WP_122828771.1	GenBank	224	254	SDGRAGAAAEVADYLLLQVLNRYEPLLEHI	SC	0	0	id_50_3605
BKP1_000223	WP_122828771.1 type VI secretion system baseplate subunit TssK [Burkholderia pseudomallei]_0156	WP_122828771.1	GenBank	95	125	QVIYLAVPLRLPNTEETAFDEQAGSLARYS	SC	0	0	id_50_3605
BKP1_000224	WP_122828771.1 type VI secretion system baseplate subunit TssK [Burkholderia pseudomallei]_0132	WP_122828771.1	GenBank	177	207	GSVALYDGDHIPPVSQYGANPLLREWATQL	SC	0	0	id_50_3605
BKP1_000225	WP_122828771.1 type VI secretion system baseplate subunit TssK [Burkholderia pseudomallei]_0217	WP_122828771.1	GenBank	372	402	SHPQRLPELIRSHLPGMTMIPLPVPPRQIP	SC	0	0	id_50_3605
BKP1_000226	tr|Q3JI38|Q3JI38_BURP1 Type VI secretion system baseplate subunit TssK OS=Burkholderia pseudomallei (strain 1710b) OX=320372 GN=BURPS1710b_A1608 PE=4 SV=1_0001	Q3JI38	Uniprot	25	55	RIGMIAMSWHNKVVWNEGLFLLPQLFQQQE	SC	0	0	id_50_3605
BKP1_000227	WP_045243620.1 type VI secretion system baseplate subunit TssK [Burkholderia pseudomallei]_0157	WP_045243620.1	GenBank	40	70	FFWGFSRYEIDQESLSFGKLVFKNGAGIFP	SC	0	0	id_50_3605
BKP1_000228	WP_122828771.1 type VI secretion system baseplate subunit TssK [Burkholderia pseudomallei]_0368	WP_122828771.1	GenBank	140	170	PKPVQLANMRLRLLPEKELTQSWIGIALTR	SC	0	0	id_50_3605
BKP1_000229	WP_038775274.1 type VI secretion system baseplate subunit TssK [Burkholderia pseudomallei]_0414	WP_038775274.1	GenBank	302	332	RPLVDEVHYLLNQVLIRGAQPIPLAEQPHG	SC	0	0	id_50_3605
BKP1_000230	WP_122887574.1 type VI secretion system baseplate subunit TssK [Burkholderia pseudomallei]_0061	WP_122887574.1	GenBank	217	247	LATRLSGSDGRAGAAAGVADYLLLQVLNRY	SC	0	0	id_50_3605
BKP1_000231	WP_038791298.1 type VI secretion system baseplate subunit TssK [Burkholderia pseudomallei]_0398	WP_038791298.1	GenBank	100	130	AVPLRLPNTEETAFGEQAGSLARYSAFEIE	SC	0	0	id_50_3605
BKP1_000232	WP_122828771.1 type VI secretion system baseplate subunit TssK [Burkholderia pseudomallei]_0372	WP_122828771.1	GenBank	255	285	RIREMPPVTLYRELSMLAGELSTFVRPQTR	SC	0	0	id_50_3605
BKP1_000233	WP_122828771.1 type VI secretion system baseplate subunit TssK [Burkholderia pseudomallei]_0264	WP_122828771.1	GenBank	414	444	TGPFWEQIAQQGGLAMHIAGHVPELKLELW	SC	0	0	id_50_3605
BKP1_000234	WP_076938542.1 type VI secretion system baseplate subunit TssK [Burkholderia pseudomallei]_0227	WP_076938542.1	GenBank	350	380	LAVHAQMPPELLQQQFAAKAKVGPSERLPD	SC	0	0	id_50_3605
BKP1_000235	WP_038737155.1 type VI secretion system baseplate subunit TssK [Burkholderia pseudomallei]_0344	WP_038737155.1	GenBank	104	134	RVPNGEETAFERAAESLARYAVFETDLRDT	SC	0	0	id_50_3605
BKP1_000236	WP_207877169.1 hypothetical protein [Burkholderia pseudomallei]_000_030	WP_207877169.1	GenBank	0	30	MDKAGRVSAGGEQPETPVSDGELLRRLRER	SW	0	0	id_50_15181
BKP1_000237	WP_207877169.1 hypothetical protein [Burkholderia pseudomallei]_022_052	WP_207877169.1	GenBank	22	52	LLRRLRERAADSQQKSMTARLAAVLDLVEE	SW	0	1	id_50_15181
BKP1_000238	WP_207877169.1 hypothetical protein [Burkholderia pseudomallei]_044_074	WP_207877169.1	GenBank	44	74	AVLDLVEEILHRGYDRSQVREILTGSAWRF	SW	0	0	id_50_15181
BKP1_000239	WP_207877169.1 hypothetical protein [Burkholderia pseudomallei]_066_096	WP_207877169.1	GenBank	66	96	LTGSAWRFTADSFDSALSRLRKRRAAPASE	SW	0	0	id_50_15181
BKP1_000240	WP_207877169.1 hypothetical protein [Burkholderia pseudomallei]_088_118	WP_207877169.1	GenBank	88	118	RRAAPASEHGLVDESNSRTTIDTRATQDSE	SW	0	0	id_50_15181
BKP1_000241	WP_207877169.1 hypothetical protein [Burkholderia pseudomallei]_111_141	WP_207877169.1	GenBank	111	141	RATQDSEVRPTSLADSFLERTRSGGGRKWR	SW	0	0	id_50_15181
BKP1_000242	WP_208798538.1 hypothetical protein [Burkholderia pseudomallei]_0071	WP_208798538.1	GenBank	108	138	TDASAAKGGEPRPSADGFLKRTGPGSGRKW	SC	0	0	id_50_15181
BKP1_000243	WP_208798538.1 hypothetical protein [Burkholderia pseudomallei]_0045	WP_208798538.1	GenBank	86	116	RKRRSNRASEQGAADETNSRAVTDASAAKG	SC	0	0	id_50_15181
BKP1_000244	WP_208798538.1 hypothetical protein [Burkholderia pseudomallei]_0067	WP_208798538.1	GenBank	2	32	QPDRVSANGVQPDASVSDGELLQRLREHAT	SC	0	0	id_50_15181
BKP1_000245	WP_145956484.1 hypothetical protein [Burkholderia pseudomallei]_0050	WP_145956484.1	GenBank	51	81	RAAPASEQGLVDESNLRTTIDTRATRDSEV	SC	0	0	id_50_15181
BKP1_000246	WP_208798538.1 hypothetical protein [Burkholderia pseudomallei]_0108	WP_208798538.1	GenBank	41	71	RLAAVLELVEEIFRRGYDRSQVREILTEVG	SC	0	0	id_50_15181
BKP1_000247	WP_208798538.1 hypothetical protein [Burkholderia pseudomallei]_0011	WP_208798538.1	GenBank	64	94	EILTEVGWRFTPDSFDSALSRLRKRRSNRA	SC	0	0	id_50_15181
BKP1_000248	WP_004191562.1 MULTISPECIES: chemotaxis protein CheW [Burkholderia]_000_030	WP_004191562.1	GenBank	0	30	MNAILEAPHAARMSGQDAARDAQEFVTFRL	SW	0	0	id_50_12412
BKP1_000249	WP_004191562.1 MULTISPECIES: chemotaxis protein CheW [Burkholderia]_022_052	WP_004191562.1	GenBank	22	52	QEFVTFRLGTEEYGIDILRVQEIRSYEEPT	SW	0	0	id_50_12412
BKP1_000250	WP_004191562.1 MULTISPECIES: chemotaxis protein CheW [Burkholderia]_044_074	WP_004191562.1	GenBank	44	74	IRSYEEPTRIANAPAFIKGVINLRGVIVPI	SW	0	0	id_50_12412
BKP1_000251	WP_004191562.1 MULTISPECIES: chemotaxis protein CheW [Burkholderia]_066_096	WP_004191562.1	GenBank	66	96	LRGVIVPIIDLRLKFALDSAEYNTSTVVIV	SW	0	0	id_50_12412
BKP1_000252	WP_004191562.1 MULTISPECIES: chemotaxis protein CheW [Burkholderia]_088_118	WP_004191562.1	GenBank	88	118	NTSTVVIVLNVAARTVGVVVDAVSDVLELA	SW	0	0	id_50_12412
BKP1_000253	WP_004191562.1 MULTISPECIES: chemotaxis protein CheW [Burkholderia]_110_140	WP_004191562.1	GenBank	110	140	VSDVLELAAADRRPAPEFGAAIDTGFITDL	SW	0	0	id_50_12412
BKP1_000254	WP_004191562.1 MULTISPECIES: chemotaxis protein CheW [Burkholderia]_132_162	WP_004191562.1	GenBank	132	162	DTGFITDLGSIAGENGNRMLILLDIERLIA	SW	0	0	id_50_12412
BKP1_000255	WP_004191562.1 MULTISPECIES: chemotaxis protein CheW [Burkholderia]_140_170	WP_004191562.1	GenBank	140	170	GSIAGENGNRMLILLDIERLIAAADVGLVG	SW	0	0	id_50_12412
BKP1_000256	WP_180945398.1 chemotaxis protein CheW, partial [Burkholderia pseudomallei]_0131	WP_180945398.1	GenBank	123	153	PAPEFGAATDTGLTTELGSNAGENGKRMLT	SC	0	0	id_50_12412
BKP1_000257	WP_004199265.1 MULTISPECIES: chemotaxis protein CheW [Burkholderia]_0108	WP_004199265.1	GenBank	102	132	NVAHRVVGMVVDGVSDVLTLSTEQIMPAPE	SC	0	0	id_50_12412
BKP1_000258	WP_180945398.1 chemotaxis protein CheW, partial [Burkholderia pseudomallei]_0121	WP_180945398.1	GenBank	146	176	NGKRMLTRIHIERRTAEAEVGRAGVAVVAD	SC	0	0	id_50_12412
BKP1_000259	WP_004199265.1 MULTISPECIES: chemotaxis protein CheW [Burkholderia]_0067	WP_004199265.1	GenBank	124	154	EQIMPAPEFGGVLTTEYLTGLGTVDGRMLI	SC	0	0	id_50_12412
BKP1_000260	WP_264257355.1 chemotaxis protein CheW, partial [Burkholderia pseudomallei]_0019	WP_264257355.1	GenBank	10	40	ARMSRQDAARDAQEFVTFRLGSEEYGIDIL	SC	0	0	id_50_12412
BKP1_000261	WP_160457521.1 chemotaxis protein CheW [Burkholderia pseudomallei]_0120	WP_160457521.1	GenBank	140	170	GSIAGENGNRMLILLDIARLISAADVGAVG	SC	0	0	id_50_12412
BKP1_000262	WP_004199265.1 MULTISPECIES: chemotaxis protein CheW [Burkholderia]_0040	WP_004199265.1	GenBank	86	116	HLGRVEYDHQTVVIILNVAHRVVGMVVDGV	SC	0	0	id_50_12412
BKP1_000263	WP_180945398.1 chemotaxis protein CheW, partial [Burkholderia pseudomallei]_0094	WP_180945398.1	GenBank	156	186	IERRTAEAEVGRAGVAVVADRGGSGGGDGR	SC	0	0	id_50_12412
BKP1_000264	WP_050858222.1 hypothetical protein [Burkholderia pseudomallei]_000_030	WP_050858222.1	GenBank	0	30	MSQLIRRAIATAVTYQATGAGGVVQTVQTA	SW	0	0	id_50_1127
BKP1_000265	WP_050858222.1 hypothetical protein [Burkholderia pseudomallei]_022_052	WP_050858222.1	GenBank	22	52	VVQTVQTALDKRVVHVSDFGVIGVSAALDT	SW	0	0	id_50_1127
BKP1_000266	WP_050858222.1 hypothetical protein [Burkholderia pseudomallei]_044_074	WP_050858222.1	GenBank	44	74	GVSAALDTLAINTAISVSVVRGGGVVIHDE	SW	0	1	id_50_1127
BKP1_000267	WP_050858222.1 hypothetical protein [Burkholderia pseudomallei]_066_096	WP_050858222.1	GenBank	66	96	GGVVIHDEPVYQIASTIVVNSQYVMLAGRG	SW	0	0	id_50_1127
BKP1_000268	WP_050858222.1 hypothetical protein [Burkholderia pseudomallei]_088_118	WP_050858222.1	GenBank	88	118	YVMLAGRGGAIDGNQPFDDTWPNIEAHVPT	SW	0	0	id_50_1127
BKP1_000269	WP_050858222.1 hypothetical protein [Burkholderia pseudomallei]_110_140	WP_050858222.1	GenBank	110	140	NIEAHVPTRWVWAGAAGGTMLNMQPIDDGA	SW	0	0	id_50_1127
BKP1_000270	WP_050858222.1 hypothetical protein [Burkholderia pseudomallei]_132_162	WP_050858222.1	GenBank	132	162	MQPIDDGAHVALNGNGVVGILFDGAETAGR	SW	0	0	id_50_1127
BKP1_000271	WP_050858222.1 hypothetical protein [Burkholderia pseudomallei]_154_184	WP_050858222.1	GenBank	154	184	DGAETAGRGWLFKTLRGGRFADCSVIRCTV	SW	2	2	id_50_1127
BKP1_000272	WP_050858222.1 hypothetical protein [Burkholderia pseudomallei]_176_206	WP_050858222.1	GenBank	176	206	CSVIRCTVANIDLGVTTNSVYGGNTSLSNN	SW	2	2	id_50_1127
BKP1_000273	WP_050858222.1 hypothetical protein [Burkholderia pseudomallei]_198_228	WP_050858222.1	GenBank	198	228	GNTSLSNNVFDNVCASNANLTATCNGAFAW	SW	2	2	id_50_1127
BKP1_000274	WP_050858222.1 hypothetical protein [Burkholderia pseudomallei]_220_250	WP_050858222.1	GenBank	220	250	TCNGAFAWNLWGNALAGNVCQNEFRDCQGF	SW	3	3	id_50_1127
BKP1_000275	WP_050858222.1 hypothetical protein [Burkholderia pseudomallei]_242_272	WP_050858222.1	GenBank	242	272	EFRDSQGFHASYATGNPSWNVENSDDNSWY	SW	0	1	id_50_1127
BKP1_000276	WP_050858222.1 hypothetical protein [Burkholderia pseudomallei]_264_294	WP_050858222.1	GenBank	264	294	NSDDNSWYEGKWNGSMILHAEDTGTYSIGE	SW	0	0	id_50_1127
BKP1_000277	WP_050858222.1 hypothetical protein [Burkholderia pseudomallei]_286_316	WP_050858222.1	GenBank	286	316	TGTYSIGESLAQNHFFYKTLGHIHVREAAN	SW	0	0	id_50_1127
BKP1_000278	WP_050858222.1 hypothetical protein [Burkholderia pseudomallei]_308_338	WP_050858222.1	GenBank	308	338	IHVREAANPATKRPSYGHVVYGYSGNLIAP	SW	0	0	id_50_1127
BKP1_000279	WP_050858222.1 hypothetical protein [Burkholderia pseudomallei]_330_360	WP_050858222.1	GenBank	330	360	YSGNLIAPPTVDGRGDISVVGSTIDYAQRS	SW	0	0	id_50_1127
BKP1_000280	WP_050858222.1 hypothetical protein [Burkholderia pseudomallei]_352_382	WP_050858222.1	GenBank	352	382	TIDYAQRSGVLTYGCQPAITNCYLSASQSM	SW	2	2	id_50_1127
BKP1_000281	WP_050858222.1 hypothetical protein [Burkholderia pseudomallei]_374_404	WP_050858222.1	GenBank	374	404	YLSASQSMANGVTTKITWAGSQYDRLSGWN	SW	0	0	id_50_1127
BKP1_000282	WP_050858222.1 hypothetical protein [Burkholderia pseudomallei]_396_426	WP_050858222.1	GenBank	396	426	YDRLSGWNSGAPTDIVVPQNVKWASVTLNL	SW	0	0	id_50_1127
BKP1_000283	WP_050858222.1 hypothetical protein [Burkholderia pseudomallei]_418_448	WP_050858222.1	GenBank	418	448	WASVTLNLDWDNNSTGQRYAGVFLAGGQVG	SW	0	0	id_50_1127
BKP1_000284	WP_050858222.1 hypothetical protein [Burkholderia pseudomallei]_440_470	WP_050858222.1	GenBank	440	470	FLAGGQVGADQRQAMSTSEQSVTTGVIPVT	SW	0	0	id_50_1127
BKP1_000285	WP_050858222.1 hypothetical protein [Burkholderia pseudomallei]_470_500	WP_050858222.1	GenBank	470	500	PGQVIDARVMQASGGALNIANTARLTVQWY	SW	0	0	id_50_1127
BKP1_000286	WP_122829219.1 hypothetical protein [Burkholderia pseudomallei]_0261	WP_122829219.1	GenBank	488	518	TVGTPSWDIGNTDDNSWYESKWNGSMILQA	SC	0	0	id_50_1127
BKP1_000287	WP_122826743.1 hypothetical protein [Burkholderia pseudomallei]_0075	WP_122826743.1	GenBank	69	99	VIHDEPVYRIASTIVVNSQYVTLAGRGGAI	SC	0	0	id_50_1127
BKP1_000288	WP_122829219.1 hypothetical protein [Burkholderia pseudomallei]_0326	WP_122829219.1	GenBank	419	449	NISLGTTTNNVYGGNVSLSGNVFDNVAASN	SC	0	0	id_50_1127
BKP1_000289	WP_122829219.1 hypothetical protein [Burkholderia pseudomallei]_0140	WP_122829219.1	GenBank	452	482	TATTNSAIPWVMWGNALIGGVNENEFRNLQ	SC	0	0	id_50_1127
BKP1_000290	WP_122829219.1 hypothetical protein [Burkholderia pseudomallei]_0698	WP_122829219.1	GenBank	534	564	HFFYKTLGNIIVKEANNPGTQQPSFGHVVY	SC	0	0	id_50_1127
BKP1_000291	WP_122829219.1 hypothetical protein [Burkholderia pseudomallei]_0216	WP_122829219.1	GenBank	510	540	NGSMILQAADTGTHDVTSFSLSQNHFFYKT	SC	0	0	id_50_1127
BKP1_000292	WP_122829219.1 hypothetical protein [Burkholderia pseudomallei]_0253	WP_122829219.1	GenBank	208	238	GINRFDGAITSGSAVLTSASGTFSSSDIGN	SC	0	0	id_50_1127
BKP1_000293	WP_052122094.1 hypothetical protein [Burkholderia pseudomallei]_0315	WP_052122094.1	GenBank	140	170	HVALNGNSVVGILFDGAETAGRGWSFKTLR	SC	0	0	id_50_1127
BKP1_000294	WP_122829219.1 hypothetical protein [Burkholderia pseudomallei]_0291	WP_122829219.1	GenBank	339	369	TNTWANIVSSAATRVVWAGAANGTMLNIQP	SC	0	0	id_50_1127
BKP1_000295	WP_122829219.1 hypothetical protein [Burkholderia pseudomallei]_0319	WP_122829219.1	GenBank	563	593	YGYSGNLINPITVQGRGDITVYGTTINYAN	SC	0	0	id_50_1127
BKP1_000296	WP_122829219.1 hypothetical protein [Burkholderia pseudomallei]_0529	WP_122829219.1	GenBank	54	84	VPMLSVTGSVTTPTVTAAPTSGAALTVNPS	SC	0	0	id_50_1127
BKP1_000297	WP_122829219.1 hypothetical protein [Burkholderia pseudomallei]_0682	WP_122829219.1	GenBank	284	314	DDTSAINAAVASISLTGGIIYFPRGTYMQT	SC	0	0	id_50_1127
BKP1_000298	WP_122829219.1 hypothetical protein [Burkholderia pseudomallei]_0242	WP_122829219.1	GenBank	317	347	TVNNQYVVFSGDGGAIDGNQTFTNTWANIV	SC	0	0	id_50_1127
BKP1_000299	WP_122829219.1 hypothetical protein [Burkholderia pseudomallei]_0511	WP_122829219.1	GenBank	359	389	ANGTMLNIQPIDDGAHAPLNGNGVTGMMWD	SC	0	0	id_50_1127
BKP1_000300	WP_143292577.1 hypothetical protein [Burkholderia pseudomallei]_0040	WP_143292577.1	GenBank	397	427	DRLQGWISGTPTNIVVPNNIKWMTATLNVS	SC	0	0	id_50_1127
BKP1_000301	WP_129112334.1 hypothetical protein [Burkholderia pseudomallei]_0444	WP_129112334.1	GenBank	285	315	TTIASVSSATSATLSANASTTVSGASYVYG	SC	0	0	id_50_1127
BKP1_000302	WP_157130281.1 hypothetical protein [Burkholderia pseudomallei]_0513	WP_157130281.1	GenBank	214	244	PGSIARSLAGKLGERISVKDFGALGDGINR	SC	0	0	id_50_1127
BKP1_000303	WP_157130281.1 hypothetical protein [Burkholderia pseudomallei]_0653	WP_157130281.1	GenBank	58	88	QVLTAAQLNNQFSLYVPLAGGTLTGPLTVP	SC	0	0	id_50_1127
BKP1_000304	WP_122829219.1 hypothetical protein [Burkholderia pseudomallei]_0516	WP_122829219.1	GenBank	468	498	LIGGVNENEFRNLQAFSATYTVGTPSWDIG	SC	0	0	id_50_1127
BKP1_000305	WP_143292577.1 hypothetical protein [Burkholderia pseudomallei]_0425	WP_143292577.1	GenBank	470	500	PGQVIDARVSQTSGGSLNIANIARLTVQWY	SC	0	0	id_50_1127
BKP1_000306	WP_122829219.1 hypothetical protein [Burkholderia pseudomallei]_0017	WP_122829219.1	GenBank	126	156	GTGGNHPVQVISNNAVVGTFSSSGLSLPAA	SC	0	0	id_50_1127
BKP1_000307	WP_157130281.1 hypothetical protein [Burkholderia pseudomallei]_0309	WP_157130281.1	GenBank	615	645	VYGTTINYSNRLGLMTYGSQPAFTNVYLSA	SC	0	0	id_50_1127
BKP1_000308	WP_122829219.1 hypothetical protein [Burkholderia pseudomallei]_0191	WP_122829219.1	GenBank	16	46	GSANAQFTPGQVLTAARLNSQFALYTPLAG	SC	0	0	id_50_1127
BKP1_000309	WP_191047299.1 hypothetical protein [Burkholderia pseudomallei]_0221	WP_191047299.1	GenBank	419	449	MTATLNVSWDLNSTGARYVGIFLDGAPVSQ	SC	0	0	id_50_1127
BKP1_000310	WP_122829219.1 hypothetical protein [Burkholderia pseudomallei]_0040	WP_122829219.1	GenBank	81	111	NPSGTNSPFIDFTNGGTAGLGYAYFGFDVP	SC	0	0	id_50_1127
BKP1_000311	WP_143292577.1 hypothetical protein [Burkholderia pseudomallei]_0350	WP_143292577.1	GenBank	446	476	VSQDQRIASSTSEQSVTTGVISVTPGQVID	SC	0	0	id_50_1127
BKP1_000312	WP_122829219.1 hypothetical protein [Burkholderia pseudomallei]_0628	WP_122829219.1	GenBank	665	695	NSTGQRYAAVYLAGSPVAEEQVASSGLSQA	SC	0	0	id_50_1127
BKP1_000313	WP_208794926.1 hypothetical protein [Burkholderia pseudomallei]_0321	WP_208794926.1	GenBank	375	405	LNASQSIANASLSKLTWDGSQYDRLQGWIS	SC	0	0	id_50_1127
BKP1_000314	WP_122829219.1 hypothetical protein [Burkholderia pseudomallei]_0141	WP_122829219.1	GenBank	617	647	PNAATTTISWNGANYDQLSGWSAGTPTQIT	SC	0	0	id_50_1127
BKP1_000315	WP_157130281.1 hypothetical protein [Burkholderia pseudomallei]_0135	WP_157130281.1	GenBank	263	293	SSSDIGKPIIVSGAASAGLPLVTTIASVSS	SC	0	0	id_50_1127
BKP1_000316	WP_122829219.1 hypothetical protein [Burkholderia pseudomallei]_0196	WP_122829219.1	GenBank	169	199	TAATTNLQYLQGATGSVARSVTSKLGERIS	SC	0	0	id_50_1127
BKP1_000317	WP_157130281.1 hypothetical protein [Burkholderia pseudomallei]_0655	WP_157130281.1	GenBank	712	742	PVAEQQNPASGSSQQTITTGVIPVSPGQVF	SC	0	0	id_50_1127
BKP1_000318	WP_122829219.1 hypothetical protein [Burkholderia pseudomallei]_0107	WP_122829219.1	GenBank	642	672	PTQITVPQNVKWMEATLYVSWANNSTGQRY	SC	0	0	id_50_1127
BKP1_000319	WP_157130281.1 hypothetical protein [Burkholderia pseudomallei]_0307	WP_157130281.1	GenBank	660	690	GANYDQLSAWSSGSPTQVTVPANVKWANGV	SC	0	0	id_50_1127
BKP1_000320	WP_157130281.1 hypothetical protein [Burkholderia pseudomallei]_0613	WP_157130281.1	GenBank	17	47	SADRRDDQPPPGGISISAMRKLLAAFLLLV	SC	0	0	id_50_1127
BKP1_000321	WP_122826743.1 hypothetical protein [Burkholderia pseudomallei]_0040	WP_122826743.1	GenBank	247	277	QGFHASYAIGNPSWNVENSDDNSWYESKWN	SC	0	0	id_50_1127
BKP1_000322	WP_157130281.1 hypothetical protein [Burkholderia pseudomallei]_0324	WP_157130281.1	GenBank	148	178	SGTTPQAFIVGSGGNHPVQIVSNNIVVGTF	SC	0	0	id_50_1127
BKP1_000323	WP_122829219.1 hypothetical protein [Burkholderia pseudomallei]_0378	WP_122829219.1	GenBank	433	463	NVSLSGNVFDNVAASNANLTATTNSAIPWV	SC	0	0	id_50_1127
BKP1_000324	WP_157130281.1 hypothetical protein [Burkholderia pseudomallei]_0468	WP_157130281.1	GenBank	178	208	SSSGLSLPTSLSISSGGTGATTATGATANL	SC	0	0	id_50_1127
BKP1_000325	WP_122829219.1 hypothetical protein [Burkholderia pseudomallei]_0519	WP_122829219.1	GenBank	694	724	ATISTGVIPVTPGQVITGQVLQASGGALNL	SC	0	0	id_50_1127
BKP1_000326	WP_122829219.1 hypothetical protein [Burkholderia pseudomallei]_0632	WP_122829219.1	GenBank	103	133	AYFGFDVPGGTLGVGTTPQAFVMGTGGNHP	SC	0	0	id_50_1127
BKP1_000327	WP_147483232.1 hypothetical protein [Burkholderia pseudomallei]_0391	WP_147483232.1	GenBank	235	265	IGNPIVVRGAGSAGLPLVTKIVSVSSATSA	SC	0	0	id_50_1127
BKP1_000328	WP_157130281.1 hypothetical protein [Burkholderia pseudomallei]_0049	WP_157130281.1	GenBank	116	146	GTNSSFIDFTNGGTPGLGYAYVGFDVPGGA	SC	0	0	id_50_1127
BKP1_000329	WP_122829219.1 hypothetical protein [Burkholderia pseudomallei]_0543	WP_122829219.1	GenBank	597	627	MTYGSQPAITNVYTNATQSIPNAATTTISW	SC	0	0	id_50_1127
BKP1_000330	WP_147483232.1 hypothetical protein [Burkholderia pseudomallei]_0564	WP_147483232.1	GenBank	147	177	SSGLSLPAALGISSGGTNATTATAATTNLQ	SC	0	0	id_50_1127
BKP1_000331	WP_157130281.1 hypothetical protein [Burkholderia pseudomallei]_0701	WP_157130281.1	GenBank	337	367	FPRGTYMQTSTITENNQYVMFLGDGGAIDG	SC	0	0	id_50_1127
BKP1_000332	WP_157130281.1 hypothetical protein [Burkholderia pseudomallei]_0101	WP_157130281.1	GenBank	693	723	SWGNNGTGQRYIGIYLAGSPVAEQQNPASG	SC	0	0	id_50_1127
BKP1_000333	WP_129112334.1 hypothetical protein [Burkholderia pseudomallei]_0060	WP_129112334.1	GenBank	308	338	GASYVYGTDDTSAINAAVASIRLTGGIIYF	SC	0	0	id_50_1127
BKP1_000334	WP_122829219.1 hypothetical protein [Burkholderia pseudomallei]_0001	WP_122829219.1	GenBank	261	291	ATSATLSDNASTTVSGASYVYGADDTSAIN	SC	0	0	id_50_1127
BKP1_000335	WP_157129887.1 hypothetical protein [Burkholderia pseudomallei]_0685	WP_157129887.1	GenBank	6	36	ILMLGMIPRFIATPLNGPRAEESADRRDDQ	SC	0	0	id_50_1127
BKP1_000336	WP_129112334.1 hypothetical protein [Burkholderia pseudomallei]_0475	WP_129112334.1	GenBank	192	222	SGGTGATTATDATANLQYLQGAPGSIARSL	SC	0	0	id_50_1127
BKP1_000337	WP_208206789.1 hypothetical protein [Burkholderia pseudomallei]_000_030	WP_208206789.1	GenBank	0	30	MNPITQVQRFPNADPAVGASARHVFLLYKP	SW	0	0	id_50_5266
BKP1_000338	WP_208206789.1 hypothetical protein [Burkholderia pseudomallei]_022_052	WP_208206789.1	GenBank	22	52	HVFLLYKPILSQMLVIAGAMLPTAVSVGIA	SW	0	0	id_50_5266
BKP1_000339	WP_208206789.1 hypothetical protein [Burkholderia pseudomallei]_044_074	WP_208206789.1	GenBank	44	74	TAVSVGIATYAGWHRGGSLVERTMNIALGT	SW	0	0	id_50_5266
BKP1_000340	WP_208206789.1 hypothetical protein [Burkholderia pseudomallei]_066_096	WP_208206789.1	GenBank	66	96	TMNIALGTVAVLYVHLLPMGSRALRGYARI	SW	0	0	id_50_5266
BKP1_000341	WP_208206789.1 hypothetical protein [Burkholderia pseudomallei]_088_118	WP_208206789.1	GenBank	88	118	ALRGYARIFAGALWSVSLAVVLYGQVSFFM	SW	0	0	id_50_5266
BKP1_000342	WP_208206789.1 hypothetical protein [Burkholderia pseudomallei]_110_140	WP_208206789.1	GenBank	110	140	YGQVSFFMVSQQHAGEQRAETVSVAMPLRV	SW	0	0	id_50_5266
BKP1_000343	WP_208206789.1 hypothetical protein [Burkholderia pseudomallei]_132_162	WP_208206789.1	GenBank	132	162	SVAMPLRVGMPSGRSLTEIAQDAAKVRADL	SW	0	0	id_50_5266
BKP1_000344	WP_208206789.1 hypothetical protein [Burkholderia pseudomallei]_154_184	WP_208206789.1	GenBank	154	184	AAKVRADLADAETRRCIPDCPGLKVRRTTL	SW	2	2	id_50_5266
BKP1_000345	WP_208206789.1 hypothetical protein [Burkholderia pseudomallei]_176_206	WP_208206789.1	GenBank	176	206	LKVRRTTLAAKLAALDTEADEAKRREAEED	SW	0	0	id_50_5266
BKP1_000346	WP_208206789.1 hypothetical protein [Burkholderia pseudomallei]_220_250	WP_208206789.1	GenBank	220	250	TLRADPVAFQVASMLGMTEGRFELGLGVAS	SW	0	1	id_50_5266
BKP1_000347	WP_208206789.1 hypothetical protein [Burkholderia pseudomallei]_242_272	WP_208206789.1	GenBank	242	272	ELGLGVASAVVLEGAGVIGWLLVWVASGHA	SW	0	1	id_50_5266
BKP1_000348	WP_208206789.1 hypothetical protein [Burkholderia pseudomallei]_264_294	WP_208206789.1	GenBank	264	294	VWVASGHAGSREGIASGRDVSAPDRPVVAP	SW	0	0	id_50_5266
BKP1_000349	WP_208206789.1 hypothetical protein [Burkholderia pseudomallei]_286_316	WP_208206789.1	GenBank	286	316	PDRPVVAPERDFTTGDRTTQVGDHEGVALG	SW	0	0	id_50_5266
BKP1_000350	WP_208206789.1 hypothetical protein [Burkholderia pseudomallei]_308_338	WP_208206789.1	GenBank	308	338	DHEGVALGRAAFSTEESTDSPVGSEDDLLL	SW	0	0	id_50_5266
BKP1_000351	WP_208206789.1 hypothetical protein [Burkholderia pseudomallei]_330_360	WP_208206789.1	GenBank	330	360	GSEDDLLLKKIHQAVVMGQLRPTQESIRKF	SW	0	0	id_50_5266
BKP1_000352	WP_208206789.1 hypothetical protein [Burkholderia pseudomallei]_354_384	WP_208206789.1	GenBank	354	384	ESIRKFLRSGQPKAGSLNRRYVARFGNARN	SW	0	1	id_50_5266
BKP1_000353	WP_122832308.1 hypothetical protein [Burkholderia pseudomallei]_0113	WP_122832308.1	GenBank	60	90	ATAATAVSLGIATYAGWLRGGLPVERAMNI	SC	0	0	id_50_5266
BKP1_000354	WP_076853780.1 hypothetical protein [Burkholderia pseudomallei]_0053	WP_076853780.1	GenBank	66	96	PVERAMNIALGAVAVLYVHLLPVGWRSLRV	SC	0	0	id_50_5266
BKP1_000355	WP_076853780.1 hypothetical protein [Burkholderia pseudomallei]_0209	WP_076853780.1	GenBank	336	366	SEDDLLLDKIRDAVVTGHLKPTQEAIRKFL	SC	0	0	id_50_5266
BKP1_000356	WP_122878296.1 hypothetical protein [Burkholderia pseudomallei]_0106	WP_122878296.1	GenBank	179	209	PSLKARQTILAAQLVALRTEADEAKRREAE	SC	0	0	id_50_5266
BKP1_000357	WP_122832308.1 hypothetical protein [Burkholderia pseudomallei]_0021	WP_122832308.1	GenBank	18	48	AIGGAFPQAELPEHAPQLFRLNARMREMIR	SC	0	0	id_50_5266
BKP1_000358	WP_264258294.1 hypothetical protein [Burkholderia pseudomallei]_0119	WP_264258294.1	GenBank	248	278	FSYAIVLEGAAIIGWLMVSVAPGRAVGRAT	SC	0	0	id_50_5266
BKP1_000359	WP_208812556.1 hypothetical protein [Burkholderia pseudomallei]_0280	WP_208812556.1	GenBank	325	355	ADSPVGSEDELLLKKIHQAVVTGQLRPTQE	SC	0	0	id_50_5266
BKP1_000360	WP_122878296.1 hypothetical protein [Burkholderia pseudomallei]_0010	WP_122878296.1	GenBank	224	254	AKLRADPVVSQVAPWLGTTEGSLELLVAFA	SC	0	0	id_50_5266
BKP1_000361	WP_122832308.1 hypothetical protein [Burkholderia pseudomallei]_0159	WP_122832308.1	GenBank	133	163	LTFFMVSQRHAGEKRAGALAPVVVTPASPV	SC	0	0	id_50_5266
BKP1_000362	WP_076853780.1 hypothetical protein [Burkholderia pseudomallei]_0101	WP_076853780.1	GenBank	280	310	ATVVSNQETVAREPEAVAPIDGITVSDSQE	SC	0	0	id_50_5266
BKP1_000363	WP_264258294.1 hypothetical protein [Burkholderia pseudomallei]_0136	WP_264258294.1	GenBank	184	214	RETILAAQLAALKTEADEAKRHEIEEDRLN	SC	0	0	id_50_5266
BKP1_000364	WP_208205908.1 hypothetical protein [Burkholderia pseudomallei]_0156	WP_208205908.1	GenBank	305	335	QVGDHEAVPLGRAALSTEESTDSPIGSEDD	SC	0	0	id_50_5266
BKP1_000365	WP_122878296.1 hypothetical protein [Burkholderia pseudomallei]_0253	WP_122878296.1	GenBank	315	345	LPVASTVGPVSEASGESNLVVSEDDLLLDK	SC	0	0	id_50_5266
BKP1_000366	WP_264258294.1 hypothetical protein [Burkholderia pseudomallei]_0110	WP_264258294.1	GenBank	296	326	YDIAARSRATPADNDAAGASGGDVPASEGA	SC	0	0	id_50_5266
BKP1_000367	WP_264258294.1 hypothetical protein [Burkholderia pseudomallei]_0295	WP_264258294.1	GenBank	329	359	ATFEYDVLLQEIHKAVAAGRLKPTQAAIRG	SC	0	0	id_50_5266
BKP1_000368	WP_264258294.1 hypothetical protein [Burkholderia pseudomallei]_0340	WP_264258294.1	GenBank	3	33	DKRYSGKTGERRGAPQSSRLKLPTRSAINR	SC	0	0	id_50_5266
BKP1_000369	WP_122878296.1 hypothetical protein [Burkholderia pseudomallei]_0334	WP_122878296.1	GenBank	255	285	AVVLEGAAVIGWLMASVALRRVASRATVVS	SC	0	0	id_50_5266
BKP1_000370	WP_264258294.1 hypothetical protein [Burkholderia pseudomallei]_0299	WP_264258294.1	GenBank	271	301	RAVGRATIVSDRGSMALDDEALALGYDIAA	SC	0	0	id_50_5266
BKP1_000371	WP_264258294.1 hypothetical protein [Burkholderia pseudomallei]_0345	WP_264258294.1	GenBank	140	170	TPASPKLPPARALTEVTREAARVSADMART	SC	0	0	id_50_5266
BKP1_000372	WP_264258294.1 hypothetical protein [Burkholderia pseudomallei]_0200	WP_264258294.1	GenBank	25	55	PTRSAINRLGALPMLPMVGASSATAVSLGI	SC	0	0	id_50_5266
BKP1_000373	WP_122878296.1 hypothetical protein [Burkholderia pseudomallei]_0317	WP_122878296.1	GenBank	281	311	TVVSDQETVARGPEAVAPIDGITLSDSQER	SC	0	0	id_50_5266
BKP1_000374	WP_122832308.1 hypothetical protein [Burkholderia pseudomallei]_0072	WP_122832308.1	GenBank	0	30	MNISKSMLDRTPTYPIARAIGGAFPQAELP	SC	0	0	id_50_5266
BKP1_000375	WP_208812556.1 hypothetical protein [Burkholderia pseudomallei]_0014	WP_208812556.1	GenBank	117	147	MVSQQHAGELRAETVSVAIPLRVGMPSGRS	SC	0	0	id_50_5266
BKP1_000376	WP_076853780.1 hypothetical protein [Burkholderia pseudomallei]_0240	WP_076853780.1	GenBank	315	345	LPLASMVGPVSEASGDSNPVVSEDDLLLDK	SC	0	0	id_50_5266
BKP1_000377	WP_264258294.1 hypothetical protein [Burkholderia pseudomallei]_0175	WP_264258294.1	GenBank	69	99	RTMNIALGIVAVLYVHLLPMGWRTLRISTR	SC	0	0	id_50_5266
BKP1_000378	WP_076853780.1 hypothetical protein [Burkholderia pseudomallei]_0194	WP_076853780.1	GenBank	258	288	LEGAAIIGWLMVSVASRRVESSATVVSNQE	SC	0	0	id_50_5266
BKP1_000379	WP_076853780.1 hypothetical protein [Burkholderia pseudomallei]_0088	WP_076853780.1	GenBank	121	151	MVSQQHAGEKRAALAPVVLTPASPVRPPGR	SC	0	0	id_50_5266
BKP1_000380	WP_208812556.1 hypothetical protein [Burkholderia pseudomallei]_0007	WP_208812556.1	GenBank	299	329	TGDRTTQMGDHEGVALGRAALSTEESADSP	SC	0	0	id_50_5266
BKP1_000381	WP_264258294.1 hypothetical protein [Burkholderia pseudomallei]_0263	WP_264258294.1	GenBank	119	149	FFMVSQQHAGEKRAASASANVTPASPKLPP	SC	0	0	id_50_5266
BKP1_000382	WP_122878296.1 hypothetical protein [Burkholderia pseudomallei]_0152	WP_122878296.1	GenBank	204	234	RREAEEDRLDDQADRNDALRAKLRADPVVS	SC	0	0	id_50_5266
BKP1_000383	WP_122832308.1 hypothetical protein [Burkholderia pseudomallei]_0188	WP_122832308.1	GenBank	161	191	PVRPPGRTLTDIARDVAQVSADLARADARR	SC	0	0	id_50_5266
BKP1_000384	WP_122832308.1 hypothetical protein [Burkholderia pseudomallei]_0108	WP_122832308.1	GenBank	86	116	AMNIALGAVAVLYVHLLPFGWRSLRIPARV	SC	0	0	id_50_5266
BKP1_000385	WP_264258294.1 hypothetical protein [Burkholderia pseudomallei]_0357	WP_264258294.1	GenBank	311	341	AAGASGGDVPASEGAGSPATFEYDVLLQEI	SC	0	0	id_50_5266
BKP1_000386	WP_264258294.1 hypothetical protein [Burkholderia pseudomallei]_0179	WP_264258294.1	GenBank	230	260	VVALWLGTTEALLELLAAFSYAIVLEGAAI	SC	0	0	id_50_5266
BKP1_000387	WP_264258294.1 hypothetical protein [Burkholderia pseudomallei]_0275	WP_264258294.1	GenBank	205	235	HEIEEDRLNDQADRNEALRADPVASVVALW	SC	0	0	id_50_5266
BKP1_000388	WP_208812556.1 hypothetical protein [Burkholderia pseudomallei]_0089	WP_208812556.1	GenBank	196	226	EAKRREAEEDRRNELVDRNEELRATLRADP	SC	0	0	id_50_5266
BKP1_000389	WP_208812556.1 hypothetical protein [Burkholderia pseudomallei]_0190	WP_208812556.1	GenBank	36	66	VIAGAMLPTAASVGIATYAGWHRGGSLVER	SC	0	0	id_50_5266
BKP1_000390	WP_076853780.1 hypothetical protein [Burkholderia pseudomallei]_0169	WP_076853780.1	GenBank	196	226	RTEADEAKRREAEEDRLHDQADRNDALRAK	SC	0	0	id_50_5266
BKP1_000391	WP_208812556.1 hypothetical protein [Burkholderia pseudomallei]_0319	WP_208812556.1	GenBank	216	246	ELRATLRADPVAFQVASMLGTTEGRFELGL	SC	0	0	id_50_5266
BKP1_000392	WP_076853780.1 hypothetical protein [Burkholderia pseudomallei]_0136	WP_076853780.1	GenBank	179	209	PSLKARQTVLAAQLVALRTEADEAKRREAE	SC	0	0	id_50_5266
BKP1_000393	WP_208812556.1 hypothetical protein [Burkholderia pseudomallei]_0244	WP_208812556.1	GenBank	87	117	RALRGYARISAGALWSVSLAVVLYGQVSFF	SC	0	0	id_50_5266
BKP1_000394	WP_076853780.1 hypothetical protein [Burkholderia pseudomallei]_0183	WP_076853780.1	GenBank	144	174	PVRPPGRTLTDIARDVAQVSTDLARADARR	SC	0	0	id_50_5266
BKP1_000395	WP_264258294.1 hypothetical protein [Burkholderia pseudomallei]_0178	WP_264258294.1	GenBank	101	131	AFVLWGVSLVVVLYAQLTFFMVSQQHAGEK	SC	0	0	id_50_5266
BKP1_000396	WP_076853780.1 hypothetical protein [Burkholderia pseudomallei]_0109	WP_076853780.1	GenBank	70	100	AMNIALGAVAVLYVHLLPVGWRSLRVPARV	SC	0	0	id_50_5266
BKP1_000397	WP_208205908.1 hypothetical protein [Burkholderia pseudomallei]_0178	WP_208205908.1	GenBank	193	223	EADEAKRHEAEEDRRNELADRNEELRATLR	SC	0	0	id_50_5266
BKP1_000398	WP_264258294.1 hypothetical protein [Burkholderia pseudomallei]_0329	WP_264258294.1	GenBank	60	90	WLRGGLPVERTMNIALGIVAVLYVHLLPMG	SC	0	0	id_50_5266
BKP1_000399	WP_076853780.1 hypothetical protein [Burkholderia pseudomallei]_0234	WP_076853780.1	GenBank	103	133	VLWGIALVVVLYAQLTFFMVSQQHAGEKRA	SC	0	0	id_50_5266
BKP1_000400	WP_122832308.1 hypothetical protein [Burkholderia pseudomallei]_0074	WP_122832308.1	GenBank	119	149	VLWGTALVVVLYAQLTFFMVSQRHAGEKRA	SC	0	0	id_50_5266
BKP1_000401	WP_264258294.1 hypothetical protein [Burkholderia pseudomallei]_0010	WP_264258294.1	GenBank	179	209	PALKTRETILAAQLAALKTEADEAKRHEIE	SC	0	0	id_50_5266
BKP1_000402	WP_004199273.1 MULTISPECIES: 30S ribosomal protein S19 [Pseudomonadota]_000_030	WP_004199273.1	GenBank	0	30	MARSVKKGPFSDAHLLKKVEAAAASRDKKP	SW	0	1	id_50_19237
BKP1_000403	WP_004199273.1 MULTISPECIES: 30S ribosomal protein S19 [Pseudomonadota]_022_052	WP_004199273.1	GenBank	22	52	AASRDKKPIKTWSRRSTILPDFIGLTIAVH	SW	0	0	id_50_19237
BKP1_000404	WP_004199273.1 MULTISPECIES: 30S ribosomal protein S19 [Pseudomonadota]_044_074	WP_004199273.1	GenBank	44	74	IGLTIAVHNGRQHVPVYISENMVGHKLGEF	SW	0	0	id_50_19237
BKP1_000405	WP_004199273.1 MULTISPECIES: 30S ribosomal protein S19 [Pseudomonadota]_061_091	WP_004199273.1	GenBank	61	91	ISENMVGHKLGEFALTRTFKGHAADKKAKK	SW	0	0	id_50_19237
BKP1_000406	WP_172821450.1 ribosomal protein S19 family protein, partial [Burkholderia pseudomallei]_0001	WP_172821450.1	GenBank	3	33	SLKKGPFIDLHLLKKVEKAVESGDKKPLRT	SC	0	0	id_50_19237
BKP1_000407	WP_160453653.1 hypothetical protein [Burkholderia pseudomallei]_000_030	WP_160453653.1	GenBank	0	30	MDDSSAPAVAARRDQQRLAAAHGGAHVRLR	SW	0	1	id_50_14071
BKP1_000408	WP_160453653.1 hypothetical protein [Burkholderia pseudomallei]_022_052	WP_160453653.1	GenBank	22	52	GGAHVRLRQRRRQMMNALTHSPGPWEWVGN	SW	0	0	id_50_14071
BKP1_000409	WP_160453653.1 hypothetical protein [Burkholderia pseudomallei]_044_074	WP_160453653.1	GenBank	44	74	GPWEWVGNCLESKAPGHYESVLEAKVSCGQ	SW	2	2	id_50_14071
BKP1_000410	WP_160453653.1 hypothetical protein [Burkholderia pseudomallei]_066_096	WP_160453653.1	GenBank	66	96	EAKVSCGQFCYGGSVELTISDADKKLIEAC	SW	3	3	id_50_14071
BKP1_000411	WP_160453653.1 hypothetical protein [Burkholderia pseudomallei]_088_118	WP_160453653.1	GenBank	88	118	DKKLIEASPDLLMILEIIAADDDAARRERR	SW	0	0	id_50_14071
BKP1_000412	WP_160453653.1 hypothetical protein [Burkholderia pseudomallei]_110_140	WP_160453653.1	GenBank	110	140	DAARRERRQPLLMSGVRMALDAALIKAGRK	SW	0	0	id_50_14071
BKP1_000413	WP_160453653.1 hypothetical protein [Burkholderia pseudomallei]_127_157	WP_160453653.1	GenBank	127	157	MALDAALIKAGRKAAPTAVRHVTTAGVRDE	SW	0	0	id_50_14071
BKP1_000414	WP_143291122.1 hypothetical protein [Burkholderia pseudomallei]_0029	WP_143291122.1	GenBank	83	113	PLLTSGVRMALDAALIKAGRKQLERPTGGA	SC	0	0	id_50_14071
BKP1_000415	WP_143291122.1 hypothetical protein [Burkholderia pseudomallei]_0057	WP_143291122.1	GenBank	65	95	ILEIIAADDDSARRERRQPLLTSGVRMALD	SC	0	0	id_50_14071
BKP1_000416	WP_151018840.1 phage tail protein [Burkholderia pseudomallei]_000_030	WP_151018840.1	GenBank	0	30	MFAILGDIEFELIGYFDGFDATFGADYAEH	SW	0	0	id_50_8020
BKP1_000417	WP_151018840.1 phage tail protein [Burkholderia pseudomallei]_022_052	WP_151018840.1	GenBank	22	52	FGADYAEHALLQGKPRLQRMGDKLDEIRIA	SW	0	0	id_50_8020
BKP1_000418	WP_151018840.1 phage tail protein [Burkholderia pseudomallei]_044_074	WP_151018840.1	GenBank	44	74	KLDEIRIALSFHYWYSDPEAELAKLRAAVS	SW	0	1	id_50_8020
BKP1_000419	WP_151018840.1 phage tail protein [Burkholderia pseudomallei]_066_096	WP_151018840.1	GenBank	66	96	AKLRAAVSAKQAMALVFGNGDYKGWFVLTE	SW	0	0	id_50_8020
BKP1_000420	WP_151018840.1 phage tail protein [Burkholderia pseudomallei]_088_118	WP_151018840.1	GenBank	88	118	KGWFVLTEVQSTSKQTDTSGTVLSLDAQIT	SW	0	0	id_50_8020
BKP1_000421	WP_151018840.1 phage tail protein [Burkholderia pseudomallei]_110_140	WP_151018840.1	GenBank	110	140	LSLDAQITLREFVGDKKNPLKPPAVQPKVP	SW	0	0	id_50_8020
BKP1_000422	WP_151018840.1 phage tail protein [Burkholderia pseudomallei]_132_162	WP_151018840.1	GenBank	132	162	PAVQPKVPPAAAQAVSSVTSAVATARGTIQ	SW	0	0	id_50_8020
BKP1_000423	WP_151018840.1 phage tail protein [Burkholderia pseudomallei]_154_184	WP_151018840.1	GenBank	154	184	ATARGTIQQAVTWANQAQSAMRVAVDAVKV	SW	0	0	id_50_8020
BKP1_000424	WP_151018840.1 phage tail protein [Burkholderia pseudomallei]_176_206	WP_151018840.1	GenBank	176	206	VAVDAVKVVQKLKDDPFAALSRSSSVLTNI	SW	0	0	id_50_8020
BKP1_000425	WP_151018840.1 phage tail protein [Burkholderia pseudomallei]_198_228	WP_151018840.1	GenBank	198	228	SSSVLTNIKQAADPLAKLSPALASLTDQIP	SW	0	0	id_50_8020
BKP1_000426	WP_151018840.1 phage tail protein [Burkholderia pseudomallei]_220_250	WP_151018840.1	GenBank	220	250	ASLTDQIPEAAGILRASNTALDAVRSAQGG	SW	0	0	id_50_8020
BKP1_000427	WP_151018840.1 phage tail protein [Burkholderia pseudomallei]_242_272	WP_151018840.1	GenBank	242	272	AVRSAQGGLANATIGTITGAIDRAAGQLAT	SW	0	0	id_50_8020
BKP1_000428	WP_151018840.1 phage tail protein [Burkholderia pseudomallei]_266_296	WP_151018840.1	GenBank	266	296	AGQLATATGALSSAAPSLSKLAAQVATRRI	SW	0	0	id_50_8020
BKP1_000429	WP_085722608.1 phage tail protein [Burkholderia pseudomallei]_0001	WP_085722608.1	GenBank	262	292	IDRAAGQLSTASSALSSAAPSLSKLAAKVA	SC	0	0	id_50_8020
BKP1_000430	WP_122659201.1 phage tail protein [Burkholderia pseudomallei]_0030	WP_122659201.1	GenBank	0	30	MFAILGDIEFDLIGYFDGFDATFGADYAEH	SC	0	0	id_50_8020
BKP1_000431	WP_122659201.1 phage tail protein [Burkholderia pseudomallei]_0224	WP_122659201.1	GenBank	265	295	AAGQLSTATGALSSAAPSLSKLAAQVTTRR	SC	0	0	id_50_8020
BKP1_000432	WP_221175454.1 hypothetical protein, partial [Burkholderia pseudomallei]_022_052	WP_221175454.1	GenBank	22	52	EHIREKIRLLTAPFSAALRSQQQRNEIMIT	SW	0	1	id_50_14604
BKP1_000433	WP_221175454.1 hypothetical protein, partial [Burkholderia pseudomallei]_044_074	WP_221175454.1	GenBank	44	74	QRNEIMITYSQRVNNFFTTASRTARITASR	SW	0	0	id_50_14604
BKP1_000434	WP_218640282.1 hypothetical protein, partial [Burkholderia pseudomallei]_0025	WP_218640282.1	GenBank	22	52	RQHLRFVQAFFERIFHASNSSIGRPEIRGK	SC	0	0	id_50_14604
BKP1_000435	WP_232286479.1 MULTISPECIES: hypothetical protein, partial [pseudomallei group]_0038	WP_232286479.1	GenBank	19	49	RLYRRPYRMSRETSRFPLRAAFAVARKRRD	SC	0	0	id_50_14604
BKP1_000436	WP_219726935.1 hypothetical protein, partial [Burkholderia pseudomallei]_0037	WP_219726935.1	GenBank	54	84	RVNNFFTTAPRTARITAPRPRPLPSTADRT	SC	0	0	id_50_14604
BKP1_000437	WP_195762088.1 hypothetical protein [Burkholderia pseudomallei]_0029	WP_195762088.1	GenBank	53	83	QRVNNFLLPRRAPPGSPPRALGRLYRRPYR	SC	0	0	id_50_14604
BKP1_000438	WP_221174885.1 hypothetical protein, partial [Burkholderia pseudomallei]_0074	WP_221174885.1	GenBank	11	41	SSAHTYRLFIVKEHIREKIRPLTAPFSAAL	SC	0	0	id_50_14604
BKP1_000439	WP_221174821.1 hypothetical protein, partial [Burkholderia pseudomallei]_0074	WP_221174821.1	GenBank	54	84	RVNNFFTTASPTAQITASRPRPPLPPTVPP	SC	0	0	id_50_14604
BKP1_000440	WP_221077530.1 hypothetical protein, partial [Burkholderia pseudomallei]_0026	WP_221077530.1	GenBank	42	72	QQQRSEIMITYSQRVNNFFTTASRTAQITA	SC	0	0	id_50_14604
BKP1_000441	WP_218643314.1 hypothetical protein, partial [Burkholderia pseudomallei]_0010	WP_218643314.1	GenBank	6	36	PLTSSAHTYRLFIVKEHIREKTRLLTAPFS	SC	0	0	id_50_14604
BKP1_000442	WP_221163480.1 hypothetical protein, partial [Burkholderia pseudomallei]_0030	WP_221163480.1	GenBank	57	87	PPLPPTVPHEPRNLPLPPSRRVVRRSAKEA	SC	0	0	id_50_14604
BKP1_000443	WP_221174885.1 hypothetical protein, partial [Burkholderia pseudomallei]_0068	WP_221174885.1	GenBank	60	90	FFTTASRTTQITAPRPRPPLPPTVPHEPRN	SC	0	0	id_50_14604
BKP1_000444	WP_206680264.1 hypothetical protein, partial [Burkholderia pseudomallei]_0017	WP_206680264.1	GenBank	40	70	IFGASNSSIGRPKIRGKGKQHFALYVFSDA	SC	0	0	id_50_14604
BKP1_000445	WP_206731657.1 hypothetical protein, partial [Burkholderia pseudomallei]_0049	WP_206731657.1	GenBank	0	30	YFRLRSENRPLTSSAHTYRLFIVKEHIREK	SC	0	0	id_50_14604
BKP1_000446	WP_203563551.1 hypothetical protein, partial [Burkholderia pseudomallei]_0047	WP_203563551.1	GenBank	72	102	RSPLPPTVPPEPRNLPLPPSHRVRRSAKEA	SC	0	0	id_50_14604
BKP1_000447	WP_218644126.1 hypothetical protein, partial [Burkholderia pseudomallei]_0052	WP_218644126.1	GenBank	0	30	LIRSASTTFLLPRRAPPRSPPRALGRLYRR	SC	0	0	id_50_14604
BKP1_000448	WP_221040966.1 hypothetical protein, partial [Burkholderia pseudomallei]_0049	WP_221040966.1	GenBank	37	67	SQRVNNFFTTAPRTAQITASRPRPPLPPTV	SC	0	0	id_50_14604
BKP1_000449	WP_204376450.1 hypothetical protein, partial [Burkholderia pseudomallei]_0026	WP_204376450.1	GenBank	0	30	MRSENRPLPSSAHTYRLFIVKEHIRKKIRL	SC	0	0	id_50_14604
BKP1_000450	tr|A3NDX8|A3NDX8_BURP6 Uncharacterized protein OS=Burkholderia pseudomallei (strain 668) OX=320373 GN=BURPS668_3545 PE=4 SV=1_0002	A3NDX8	Uniprot	0	30	MQAFFERIFGTSNSSIGRPEIRGKGKQHFA	SC	0	0	id_50_14604
BKP1_000451	WP_221176234.1 hypothetical protein, partial [Burkholderia pseudomallei]_0006	WP_221176234.1	GenBank	27	57	QRNEIMITYSQRVNNFFTAAPRTARITASR	SC	0	0	id_50_14604
BKP1_000452	WP_221041210.1 hypothetical protein, partial [Burkholderia pseudomallei]_0010	WP_221041210.1	GenBank	1	31	ALGRLYRRPYRLSRETSRFPLRAAFAVARK	SC	0	0	id_50_14604
BKP1_000453	WP_203563225.1 Ohr family peroxiredoxin [Burkholderia pseudomallei]_000_030	WP_203563225.1	GenBank	0	30	MDDNKLQAPPLSLLDRYRGRDFQPLYTTTV	SW	0	0	id_50_13397
BKP1_000454	WP_203563225.1 Ohr family peroxiredoxin [Burkholderia pseudomallei]_022_052	WP_203563225.1	GenBank	22	52	QPLYTTTVTVSGGETGHGRASGVVRSDDGN	SW	0	0	id_50_13397
BKP1_000455	WP_203563225.1 Ohr family peroxiredoxin [Burkholderia pseudomallei]_044_074	WP_203563225.1	GenBank	44	74	VVRSDDGNLAVDLRLPTELGGPGNGTNPEQ	SW	0	0	id_50_13397
BKP1_000456	WP_203563225.1 Ohr family peroxiredoxin [Burkholderia pseudomallei]_066_096	WP_203563225.1	GenBank	66	96	GNGTNPEQLFAAGFAASFHGALNLLEKRAD	SW	0	0	id_50_13397
BKP1_000457	WP_203563225.1 Ohr family peroxiredoxin [Burkholderia pseudomallei]_088_118	WP_203563225.1	GenBank	88	118	NLLEKRADMETADTAVEVQVSFGRDPMDGG	SW	0	0	id_50_13397
BKP1_000458	WP_203563225.1 Ohr family peroxiredoxin [Burkholderia pseudomallei]_110_140	WP_203563225.1	GenBank	110	140	GRDPMDGGYALLVDVRVRMPGVDRSIAEEL	SW	0	0	id_50_13397
BKP1_000459	WP_203563225.1 Ohr family peroxiredoxin [Burkholderia pseudomallei]_132_162	WP_203563225.1	GenBank	132	162	DRSIAEELVRTAERLSPYAKMARQGTVNIV	SW	0	1	id_50_13397
BKP1_000460	WP_203563225.1 Ohr family peroxiredoxin [Burkholderia pseudomallei]_136_166	WP_203563225.1	GenBank	136	166	AEELVRTAERLSPYAKMARQGTVNIVTVAD	SW	0	0	id_50_13397
BKP1_000461	WP_203563237.1 Ohr family peroxiredoxin [Burkholderia pseudomallei]_0104	WP_203563237.1	GenBank	30	60	TVTVSGGAANHGRASGVARSDDGNLAADLR	SC	0	0	id_50_13397
BKP1_000462	WP_203563217.1 Ohr family peroxiredoxin [Burkholderia pseudomallei]_0060	WP_203563217.1	GenBank	110	140	GRDPVDGGYALTANITIRMPGVDRQVAERL	SC	0	0	id_50_13397
BKP1_000463	WP_203563237.1 Ohr family peroxiredoxin [Burkholderia pseudomallei]_0052	WP_203563237.1	GenBank	86	116	HGALALVGKRAGANIDDTIVKAQVSFGRDP	SC	0	0	id_50_13397
BKP1_000464	WP_203563237.1 Ohr family peroxiredoxin [Burkholderia pseudomallei]_0102	WP_203563237.1	GenBank	118	148	GGSAVVIDIQVRMPSVERSTAEELVQSAER	SC	0	0	id_50_13397
BKP1_000465	WP_203563217.1 Ohr family peroxiredoxin [Burkholderia pseudomallei]_0025	WP_203563217.1	GenBank	86	116	ALSLIAQRDRIDIRETTVAVEVAFGRDPVD	SC	0	0	id_50_13397
BKP1_000466	WP_203563217.1 Ohr family peroxiredoxin [Burkholderia pseudomallei]_0073	WP_203563217.1	GenBank	2	32	NERLQPPPLTLLDKYRAREFAALYTTTVTV	SC	0	0	id_50_13397
BKP1_000467	WP_203563217.1 Ohr family peroxiredoxin [Burkholderia pseudomallei]_0122	WP_203563217.1	GenBank	52	82	LALDPRLPTELGGPGGGTNPEQLLAAGYAA	SC	0	0	id_50_13397
BKP1_000468	WP_203563237.1 Ohr family peroxiredoxin [Burkholderia pseudomallei]_0047	WP_203563237.1	GenBank	4	34	EEKPQASSISLLDRYRGRDFAPLYTATVTV	SC	0	0	id_50_13397
BKP1_000469	WP_203563217.1 Ohr family peroxiredoxin [Burkholderia pseudomallei]_0017	WP_203563217.1	GenBank	21	51	FAALYTTTVTVSGGQSGHGRASGVARSDHG	SC	0	0	id_50_13397
BKP1_000470	WP_203563217.1 Ohr family peroxiredoxin [Burkholderia pseudomallei]_0020	WP_203563217.1	GenBank	117	147	GYALTANITIRMPGVDRQVAERLVRDTERL	SC	0	0	id_50_13397
BKP1_000471	WP_203563237.1 Ohr family peroxiredoxin [Burkholderia pseudomallei]_0041	WP_203563237.1	GenBank	37	67	AANHGRASGVARSDDGNLAADLRFPSELGG	SC	0	0	id_50_13397
BKP1_000472	WP_004534196.1 MULTISPECIES: lipopolysaccharide heptosyltransferase II [Burkholderia]_000_030	WP_004534196.1	GenBank	0	30	MRRALVIAPNWIGDALMAQPLFALLKKLHP	SW	0	0	id_50_5916
BKP1_000473	WP_004534196.1 MULTISPECIES: lipopolysaccharide heptosyltransferase II [Burkholderia]_022_052	WP_004534196.1	GenBank	22	52	ALLKKLHPRIVIDAVAPAWVAPVLERMPEI	SW	0	0	id_50_5916
BKP1_000474	WP_004534196.1 MULTISPECIES: lipopolysaccharide heptosyltransferase II [Burkholderia]_044_074	WP_004534196.1	GenBank	44	74	VLERMPEIHDVHATELAHGKLQMLHRWQLA	SW	0	0	id_50_5916
BKP1_000475	WP_004534196.1 MULTISPECIES: lipopolysaccharide heptosyltransferase II [Burkholderia]_066_096	WP_004534196.1	GenBank	66	96	MLHRWQLASDLRELGYDAAYVLPNSLKSAL	SW	0	0	id_50_5916
BKP1_000476	WP_004534196.1 MULTISPECIES: lipopolysaccharide heptosyltransferase II [Burkholderia]_088_118	WP_004534196.1	GenBank	88	118	PNSLKSALIPWLAGIPLRIGYTGEHRYALL	SW	0	0	id_50_5916
BKP1_000477	WP_004534196.1 MULTISPECIES: lipopolysaccharide heptosyltransferase II [Burkholderia]_110_140	WP_004534196.1	GenBank	110	140	GEHRYALLNVRHANPGKARETRAPMAQHYA	SW	0	0	id_50_5916
BKP1_000478	WP_004534196.1 MULTISPECIES: lipopolysaccharide heptosyltransferase II [Burkholderia]_132_162	WP_004534196.1	GenBank	132	162	APMAQHYAALAYAPGAKLPESFQTLPPPRL	SW	0	0	id_50_5916
BKP1_000479	WP_004534196.1 MULTISPECIES: lipopolysaccharide heptosyltransferase II [Burkholderia]_154_184	WP_004534196.1	GenBank	154	184	QTLPPPRLEADLNETARVSARFNLDTRKPL	SW	0	0	id_50_5916
BKP1_000480	WP_004534196.1 MULTISPECIES: lipopolysaccharide heptosyltransferase II [Burkholderia]_176_206	WP_004534196.1	GenBank	176	206	NLDTRKPLIVFSPGAEYGPAKRWPPEHFAA	SW	0	0	id_50_5916
BKP1_000481	WP_004534196.1 MULTISPECIES: lipopolysaccharide heptosyltransferase II [Burkholderia]_198_228	WP_004534196.1	GenBank	198	228	WPPEHFAALAQSVSQSFPYTQIVALGSPKD	SW	0	0	id_50_5916
BKP1_000482	WP_004534196.1 MULTISPECIES: lipopolysaccharide heptosyltransferase II [Burkholderia]_220_250	WP_004534196.1	GenBank	220	250	VALGSPKDAAAAQAIAERAPNVRSLSGQTS	SW	0	1	id_50_5916
BKP1_000483	WP_004534196.1 MULTISPECIES: lipopolysaccharide heptosyltransferase II [Burkholderia]_242_272	WP_004534196.1	GenBank	242	272	RSLCGQTSLTEACALIARANAVVTNDSGLM	SW	2	2	id_50_5916
BKP1_000484	WP_004534196.1 MULTISPECIES: lipopolysaccharide heptosyltransferase II [Burkholderia]_264_294	WP_004534196.1	GenBank	264	294	VTNDSGLMHVAAALRRPLVALYGSTDPRHT	SW	0	0	id_50_5916
BKP1_000485	WP_004534196.1 MULTISPECIES: lipopolysaccharide heptosyltransferase II [Burkholderia]_286_316	WP_004534196.1	GenBank	286	316	GSTDPRHTPPLSELAKVQWLHLECSPCFER	SW	2	2	id_50_5916
BKP1_000486	WP_004534196.1 MULTISPECIES: lipopolysaccharide heptosyltransferase II [Burkholderia]_308_338	WP_004534196.1	GenBank	308	338	ECSPCFERECPLGHLKCLRELSPEQVFGDL	SW	4	4	id_50_5916
BKP1_000487	WP_004534196.1 MULTISPECIES: lipopolysaccharide heptosyltransferase II [Burkholderia]_316_346	WP_004534196.1	GenBank	316	346	ECPLGHLKCLRELSPEQVFGDLRGMLVGQR	SW	2	2	id_50_5916
BKP1_000488	WP_004526219.1 lipopolysaccharide heptosyltransferase II [Burkholderia pseudomallei]_0204	WP_004526219.1	GenBank	144	174	APGAKLPESFQTLPPPRLDADLNETARVSA	SC	0	0	id_50_5916
BKP1_000489	WP_257981681.1 lipopolysaccharide heptosyltransferase II, partial [Burkholderia pseudomallei]_0210	WP_257981681.1	GenBank	327	357	PYTNLTLPTKRIGWILMGRLRLQKKQTSRK	SC	0	0	id_50_5916
BKP1_000490	WP_024430014.1 MULTISPECIES: PC4/YdbC family ssDNA-binding protein [pseudomallei group]_000_030	WP_024430014.1	GenBank	0	30	MSTYDSGETIADVQKSATQRIRISHRWYRG	SW	0	0	id_50_20982
BKP1_000491	WP_024430014.1 MULTISPECIES: PC4/YdbC family ssDNA-binding protein [pseudomallei group]_022_052	WP_024430014.1	GenBank	22	52	ISHRWYRGRRYVDVRLVVVDRDGDFVPTRQ	SW	0	0	id_50_20982
BKP1_000492	WP_024430014.1 MULTISPECIES: PC4/YdbC family ssDNA-binding protein [pseudomallei group]_045_075	WP_024430014.1	GenBank	45	75	DFVPTRQGISIRPELLAQVIQGLLLASREG	SW	0	0	id_50_20982
BKP1_000493	WP_044368936.1 PC4/YdbC family ssDNA-binding protein [Burkholderia pseudomallei]_0013	WP_044368936.1	GenBank	23	53	SHRWYKGRRYVDVRLVVVDRDSDFVPTRQG	SC	0	0	id_50_20982
BKP1_000494	WP_004541753.1 transcriptional coactivator p15/PC4 family protein [Burkholderia pseudomallei]_0030	WP_004541753.1	GenBank	32	62	YVDVRLVVVDHDGDFVPTRQGISIRPELLA	SC	0	0	id_50_20982
BKP1_000495	WP_122831846.1 PC4/YdbC family ssDNA-binding protein [Burkholderia pseudomallei]_0022	WP_122831846.1	GenBank	45	75	DFVPTRQGISIRPELLAQVVQGLLLASREG	SC	0	0	id_50_20982
BKP1_000496	WP_259647404.1 tyrosine-type recombinase/integrase [Burkholderia pseudomallei]_000_030	WP_259647404.1	GenBank	0	30	MPNRLIPIARANSRQLTAAEFHQLGNVPPE	SW	0	0	id_50_7331
BKP1_000497	WP_259647404.1 tyrosine-type recombinase/integrase [Burkholderia pseudomallei]_022_052	WP_259647404.1	GenBank	22	52	QLGNVPPEAEWFVNLDNPRTRRAYQIDLDD	SW	0	0	id_50_7331
BKP1_000498	WP_259647404.1 tyrosine-type recombinase/integrase [Burkholderia pseudomallei]_044_074	WP_259647404.1	GenBank	44	74	AYQIDLDDFMAFTGIVQTDEFRTITRAHVI	SW	0	0	id_50_7331
BKP1_000499	WP_259647404.1 tyrosine-type recombinase/integrase [Burkholderia pseudomallei]_066_096	WP_259647404.1	GenBank	66	96	TITRAHVIAWRKRLEVRQLSGATIRRKLAA	SW	0	0	id_50_7331
BKP1_000500	WP_259647404.1 tyrosine-type recombinase/integrase [Burkholderia pseudomallei]_088_118	WP_259647404.1	GenBank	88	118	TIRRKLAALSSLFDYLSERNAVLLNPVAGV	SW	0	1	id_50_7331
BKP1_000501	WP_259647404.1 tyrosine-type recombinase/integrase [Burkholderia pseudomallei]_110_140	WP_259647404.1	GenBank	110	140	LLNPVAGVKRPRGNNNEGKTPALGDHQARA	SW	0	0	id_50_7331
BKP1_000502	WP_259647404.1 tyrosine-type recombinase/integrase [Burkholderia pseudomallei]_132_162	WP_259647404.1	GenBank	132	162	LGDHQARALLDAPDSETLKGKRDRALLAVL	SW	0	0	id_50_7331
BKP1_000503	WP_259647404.1 tyrosine-type recombinase/integrase [Burkholderia pseudomallei]_154_184	WP_259647404.1	GenBank	154	184	DRALLAVLLYHGLRREELSLLKVRDIHDRR	SW	0	0	id_50_7331
BKP1_000504	WP_259647404.1 tyrosine-type recombinase/integrase [Burkholderia pseudomallei]_176_206	WP_259647404.1	GenBank	176	206	VRDIHDRRGVPHLRIHGKGNKVRHVPLHPA	SW	0	0	id_50_7331
BKP1_000505	WP_259647404.1 tyrosine-type recombinase/integrase [Burkholderia pseudomallei]_198_228	WP_259647404.1	GenBank	198	228	RHVPLHPASAERLHTYLEAAGHGTAADAPL	SW	0	0	id_50_7331
BKP1_000506	WP_259647404.1 tyrosine-type recombinase/integrase [Burkholderia pseudomallei]_220_250	WP_259647404.1	GenBank	220	250	GTAADAPLFRSIRTSRKAMTGDGVYKSVKG	SW	0	1	id_50_7331
BKP1_000507	WP_259647404.1 tyrosine-type recombinase/integrase [Burkholderia pseudomallei]_242_272	WP_259647404.1	GenBank	242	272	GVYKCVKGYAACAGITIDGLGVHGLRATAA	SW	2	2	id_50_7331
BKP1_000508	WP_259647404.1 tyrosine-type recombinase/integrase [Burkholderia pseudomallei]_264_294	WP_259647404.1	GenBank	264	294	HGLRATAATNALEHEADIAKVQEWLGHANI	SW	0	0	id_50_7331
BKP1_000509	WP_259647404.1 tyrosine-type recombinase/integrase [Burkholderia pseudomallei]_287_317	WP_259647404.1	GenBank	287	317	WLGHANIATTRLYDRRQQRPEDSPTFKVAY	SW	0	0	id_50_7331
BKP1_000510	WP_229655149.1 tyrosine-type recombinase/integrase [Burkholderia pseudomallei]_0273	WP_229655149.1	GenBank	48	78	DLRDFMTFTGIVQADEFRTVTRAHVLAWRK	SC	0	0	id_50_7331
BKP1_000511	WP_080297499.1 tyrosine-type recombinase/integrase [Burkholderia pseudomallei]_0200	WP_080297499.1	GenBank	138	168	RALLDAPDPDTLKGKRDRAMLAVLLYHGLR	SC	0	0	id_50_7331
BKP1_000512	WP_229655149.1 tyrosine-type recombinase/integrase [Burkholderia pseudomallei]_0182	WP_229655149.1	GenBank	26	56	VPPEAEWFANLDNPRTRRAYQIDLRDFMTF	SC	0	0	id_50_7331
BKP1_000513	WP_038738924.1 tyrosine-type recombinase/integrase [Burkholderia pseudomallei]_0110	WP_038738924.1	GenBank	286	316	EWLGHANISTTRLYDRRQSRPEDSPTFKIT	SC	0	0	id_50_7331
BKP1_000514	WP_038738924.1 tyrosine-type recombinase/integrase [Burkholderia pseudomallei]_0095	WP_038738924.1	GenBank	105	135	ERNAVMLNPVAGVKRPRGNSNEGKTPALGD	SC	0	0	id_50_7331
BKP1_000515	WP_076899681.1 tyrosine-type recombinase/integrase [Burkholderia pseudomallei]_0281	WP_076899681.1	GenBank	29	59	WFANLNNEHTRRAYRGDLRDFMGFTGIERP	SC	0	0	id_50_7331
BKP1_000516	WP_076899681.1 tyrosine-type recombinase/integrase [Burkholderia pseudomallei]_0060	WP_076899681.1	GenBank	135	165	RALLDAPDNATEKGLRDRAMLSILLYHGLR	SC	0	0	id_50_7331
BKP1_000517	WP_076899681.1 tyrosine-type recombinase/integrase [Burkholderia pseudomallei]_0099	WP_076899681.1	GenBank	102	132	ERNSVDFNPVKGAKRPKVDSHEGKTPALGD	SC	0	0	id_50_7331
BKP1_000518	WP_143290756.1 tyrosine-type recombinase/integrase [Burkholderia pseudomallei]_0217	WP_143290756.1	GenBank	176	206	RDIHDRRGVPHLRVHGKGNKLRHVPLHPAS	SC	0	0	id_50_7331
BKP1_000519	WP_076899681.1 tyrosine-type recombinase/integrase [Burkholderia pseudomallei]_0147	WP_076899681.1	GenBank	205	235	GLLHAYLDAVGHGNDPAAALFRPLRAVDGE	SC	0	0	id_50_7331
BKP1_000520	WP_131202136.1 tyrosine-type recombinase/integrase [Burkholderia pseudomallei]_0051	WP_131202136.1	GenBank	242	272	YKVLRAYAGKLGITIEGLGVHSLRATAATN	SC	0	0	id_50_7331
BKP1_000521	WP_131202136.1 tyrosine-type recombinase/integrase [Burkholderia pseudomallei]_0135	WP_131202136.1	GenBank	71	101	AWRKDIEARGLSGATIRRKMAALSSLFEYL	SC	0	0	id_50_7331
BKP1_000522	WP_076899681.1 tyrosine-type recombinase/integrase [Burkholderia pseudomallei]_0238	WP_076899681.1	GenBank	179	209	RRGVQHLRVHGKGDKIRYLPLHPGTAGLLH	SC	0	0	id_50_7331
BKP1_000523	WP_076899681.1 tyrosine-type recombinase/integrase [Burkholderia pseudomallei]_0023	WP_076899681.1	GenBank	51	81	GFTGIERPEEFRVVTRAHVLAWRRDIEARG	SC	0	0	id_50_7331
BKP1_000524	WP_131202136.1 tyrosine-type recombinase/integrase [Burkholderia pseudomallei]_0045	WP_131202136.1	GenBank	7	37	ISERRLTAAQFHQLKDVPPEAEWFANLNNE	SC	0	0	id_50_7331
BKP1_000525	WP_076899681.1 tyrosine-type recombinase/integrase [Burkholderia pseudomallei]_0148	WP_076899681.1	GenBank	227	257	PLRAVDGEPITPDGVYKVLKAYAAKLGITI	SC	0	0	id_50_7331
BKP1_000526	WP_143290756.1 tyrosine-type recombinase/integrase [Burkholderia pseudomallei]_0171	WP_143290756.1	GenBank	208	238	RLHTYLKAAGHGTSPDSPLFQPIRTTGAAM	SC	0	0	id_50_7331
BKP1_000527	WP_143290756.1 tyrosine-type recombinase/integrase [Burkholderia pseudomallei]_0274	WP_143290756.1	GenBank	50	80	DFMTFTGIAQADEIRTITRAHVLAWRKHLE	SC	0	0	id_50_7331
BKP1_000528	WP_229655149.1 tyrosine-type recombinase/integrase [Burkholderia pseudomallei]_0044	WP_229655149.1	GenBank	69	99	RAHVLAWRKRLEARQLSGATIRRKLAALSS	SC	0	0	id_50_7331
BKP1_000529	WP_229655149.1 tyrosine-type recombinase/integrase [Burkholderia pseudomallei]_0045	WP_229655149.1	GenBank	0	30	MPNRLTHVARADSRQLTGAEFQQLGNVPPE	SC	0	0	id_50_7331
BKP1_000530	WP_038738924.1 tyrosine-type recombinase/integrase [Burkholderia pseudomallei]_0067	WP_038738924.1	GenBank	247	277	IRTYAVRAGTIVNGLGVHGLRTTAATNALE	SC	0	0	id_50_7331
BKP1_000531	WP_080297499.1 tyrosine-type recombinase/integrase [Burkholderia pseudomallei]_0255	WP_080297499.1	GenBank	214	244	LEAAGHDTKTDAPLFQPLRVTSAPITADGV	SC	0	0	id_50_7331
BKP1_000532	WP_229637015.1 tyrosine-type recombinase/integrase [Burkholderia pseudomallei]_0181	WP_229637015.1	GenBank	215	245	EAAGHGALPESPLFQPIRATGTAMTGDGVY	SC	0	0	id_50_7331
BKP1_000533	WP_229655149.1 tyrosine-type recombinase/integrase [Burkholderia pseudomallei]_0190	WP_229655149.1	GenBank	213	243	YLEAAGHGSKADTPLFQSIRTIGAAMTGDG	SC	0	0	id_50_7331
BKP1_000534	WP_038738924.1 tyrosine-type recombinase/integrase [Burkholderia pseudomallei]_0022	WP_038738924.1	GenBank	41	71	TRRAYQIDLHDFMTFTGIVQAVEFRTVTRA	SC	0	0	id_50_7331
BKP1_000535	WP_076899681.1 tyrosine-type recombinase/integrase [Burkholderia pseudomallei]_0202	WP_076899681.1	GenBank	285	315	WLGHANIATTRLYDRRRSRPEDSPTFKVSY	SC	0	0	id_50_7331
BKP1_000536	WP_038738924.1 tyrosine-type recombinase/integrase [Burkholderia pseudomallei]_0170	WP_038738924.1	GenBank	212	242	TYLQAAGHGSVPDAPLFQPIRTTGAPMTGD	SC	0	0	id_50_7331
BKP1_000537	WP_131202136.1 tyrosine-type recombinase/integrase [Burkholderia pseudomallei]_0117	WP_131202136.1	GenBank	170	200	RLKVRDIQQRRGVAHLRVHGKGDKIRYLPL	SC	0	0	id_50_7331
BKP1_000538	WP_038738924.1 tyrosine-type recombinase/integrase [Burkholderia pseudomallei]_0112	WP_038738924.1	GenBank	60	90	QAVEFRTVTRAHILAWRRRLETRQLSGATI	SC	0	0	id_50_7331
BKP1_000539	WP_229637015.1 tyrosine-type recombinase/integrase [Burkholderia pseudomallei]_0123	WP_229637015.1	GenBank	3	33	RLTPVARASSRQLTAAEFHQLANVPPEAEW	SC	0	0	id_50_7331
BKP1_000540	WP_038738924.1 tyrosine-type recombinase/integrase [Burkholderia pseudomallei]_0149	WP_038738924.1	GenBank	189	219	RVHGKGSKLRHVPLHPASAERLHTYLQAAG	SC	0	0	id_50_7331
BKP1_000541	WP_076899681.1 tyrosine-type recombinase/integrase [Burkholderia pseudomallei]_0067	WP_076899681.1	GenBank	0	30	MPGTDPIISERRLTATQFHQLKDVPPEAEW	SC	0	0	id_50_7331
BKP1_000542	WP_038738924.1 tyrosine-type recombinase/integrase [Burkholderia pseudomallei]_0147	WP_038738924.1	GenBank	0	30	MSNRLTSIARADSRQLTAAEFHQLGNVPPE	SC	0	0	id_50_7331
BKP1_000543	WP_080297499.1 tyrosine-type recombinase/integrase [Burkholderia pseudomallei]_0204	WP_080297499.1	GenBank	247	277	VIGYAQQVKIAVEGFGVHSLRATAATNALE	SC	0	0	id_50_7331
BKP1_000544	WP_080297499.1 tyrosine-type recombinase/integrase [Burkholderia pseudomallei]_0142	WP_080297499.1	GenBank	66	96	TVTRAHVLAWRRTLEKRRLSGATIRRKLAA	SC	0	0	id_50_7331
BKP1_000545	WP_143290756.1 tyrosine-type recombinase/integrase [Burkholderia pseudomallei]_0170	WP_143290756.1	GenBank	0	30	MPNRLTPIARAESRLTAAEFHQLGNVPPEA	SC	0	0	id_50_7331
BKP1_000546	WP_229655149.1 tyrosine-type recombinase/integrase [Burkholderia pseudomallei]_0248	WP_229655149.1	GenBank	254	284	KGVAAAGLGVHGLRATAATNALDHEADIAK	SC	0	0	id_50_7331
BKP1_000547	WP_131202136.1 tyrosine-type recombinase/integrase [Burkholderia pseudomallei]_0122	WP_131202136.1	GenBank	222	252	AALFRPLRAIDGEPITPDGVYKVLRAYAGK	SC	0	0	id_50_7331
BKP1_000548	WP_229637015.1 tyrosine-type recombinase/integrase [Burkholderia pseudomallei]_0092	WP_229637015.1	GenBank	247	277	VRSYAARAGAIVDGLGVHGLRATAATNALE	SC	0	0	id_50_7331
BKP1_000549	WP_021251775.1 hypothetical protein [Burkholderia pseudomallei]_000_030	WP_021251775.1	GenBank	0	30	MKDLKDVADRISELKGENMALLAVVDALLR	SW	0	0	id_50_19947
BKP1_000550	WP_021251775.1 hypothetical protein [Burkholderia pseudomallei]_022_052	WP_021251775.1	GenBank	22	52	AVVDALLRSMSKDQLNRFITEHTQALEVAR	SW	0	0	id_50_19947
BKP1_000551	WP_021251775.1 hypothetical protein [Burkholderia pseudomallei]_044_074	WP_021251775.1	GenBank	44	74	TQALEVARVTLLNSERAGDGVLSSFERYSE	SW	0	0	id_50_19947
BKP1_000552	WP_021251775.1 hypothetical protein [Burkholderia pseudomallei]_054_084	WP_021251775.1	GenBank	54	84	LLNSERAGDGVLSSFERYSEGFSNLAQSIR	SW	0	0	id_50_19947
BKP1_000553	WP_076809494.1 hypothetical protein [Burkholderia pseudomallei]_0033	WP_076809494.1	GenBank	53	83	TLLNSERAGDGVLSSFEQYSEGFSNLAQSI	SC	0	0	id_50_19947
BKP1_000554	WP_129111413.1 hypothetical protein [Burkholderia pseudomallei]_000_030	WP_129111413.1	GenBank	0	30	MNERPVLLQGSEHPIFRGEGNEPFSCKSCG	SW	2	2	id_50_5413
BKP1_000555	WP_129111413.1 hypothetical protein [Burkholderia pseudomallei]_022_052	WP_129111413.1	GenBank	22	52	PFSCKSCGHVLVEGHEPRKLIGVDIECAKC	SW	4	4	id_50_5413
BKP1_000556	WP_129111413.1 hypothetical protein [Burkholderia pseudomallei]_044_074	WP_129111413.1	GenBank	44	74	VDIECAKCGAISTTQLWDEREPLPASLVTL	SW	2	2	id_50_5413
BKP1_000557	WP_129111413.1 hypothetical protein [Burkholderia pseudomallei]_066_096	WP_129111413.1	GenBank	66	96	LPASLVTLGSSGRFLIKGTVDMVGKAAAIS	SW	0	0	id_50_5413
BKP1_000558	WP_129111413.1 hypothetical protein [Burkholderia pseudomallei]_088_118	WP_129111413.1	GenBank	88	118	VGKAAAISCDEEIARVQANKCQPPPHDGLD	SW	2	2	id_50_5413
BKP1_000559	WP_129111413.1 hypothetical protein [Burkholderia pseudomallei]_110_140	WP_129111413.1	GenBank	110	140	PPPHDGLDISPDMLAAVTQEVDLWTNGAFS	SW	0	0	id_50_5413
BKP1_000560	WP_129111413.1 hypothetical protein [Burkholderia pseudomallei]_132_162	WP_129111413.1	GenBank	132	162	LWTNGAFSDALSSARRARASGNELFTRSPL	SW	0	1	id_50_5413
BKP1_000561	WP_129111413.1 hypothetical protein [Burkholderia pseudomallei]_154_184	WP_129111413.1	GenBank	154	184	ELFTRSPLAWAVDRVTEALRGGAIDIDGHD	SW	0	0	id_50_5413
BKP1_000562	WP_129111413.1 hypothetical protein [Burkholderia pseudomallei]_176_206	WP_129111413.1	GenBank	176	206	AIDIDGHDAAALLYLEQWRHFSVRWKHHPL	SW	0	0	id_50_5413
BKP1_000563	WP_129111413.1 hypothetical protein [Burkholderia pseudomallei]_198_228	WP_129111413.1	GenBank	198	228	VRWKHHPLFKEVIAPALCNEYHHTIALLVC	SW	2	2	id_50_5413
BKP1_000564	WP_129111413.1 hypothetical protein [Burkholderia pseudomallei]_220_250	WP_129111413.1	GenBank	220	250	HTIALLVCCTYLEEHGNSIGITFTPGEVGK	SW	2	2	id_50_5413
BKP1_000565	WP_129111413.1 hypothetical protein [Burkholderia pseudomallei]_242_272	WP_129111413.1	GenBank	242	272	FTPGEVGKSPDLYINASPNQRVSIEIKAPD	SW	0	0	id_50_5413
BKP1_000566	WP_129111413.1 hypothetical protein [Burkholderia pseudomallei]_264_294	WP_129111413.1	GenBank	264	294	SIEIKAPDALHWPKPLPNQAEIERRVEEQL	SW	0	0	id_50_5413
BKP1_000567	WP_129111413.1 hypothetical protein [Burkholderia pseudomallei]_286_316	WP_129111413.1	GenBank	286	316	ERRVEEQLKAAAKQLTGNAGGVVVIGTNHV	SW	0	0	id_50_5413
BKP1_000568	WP_129111413.1 hypothetical protein [Burkholderia pseudomallei]_308_338	WP_129111413.1	GenBank	308	338	VVIGTNHVDPSLAGRVRAAIESLAARGRIS	SW	0	0	id_50_5413
BKP1_000569	WP_129111413.1 hypothetical protein [Burkholderia pseudomallei]_330_360	WP_129111413.1	GenBank	330	360	LAARGRISSKITIISSVSAHGTITRVDERN	SW	0	1	id_50_5413
BKP1_000570	WP_129111413.1 hypothetical protein [Burkholderia pseudomallei]_352_382	WP_129111413.1	GenBank	352	382	ITRVDERNVKPEIEWNVSVTRNPKFNGESF	SW	0	0	id_50_5413
BKP1_000571	WP_129111413.1 hypothetical protein [Burkholderia pseudomallei]_357_387	WP_129111413.1	GenBank	357	387	ERNVKPEIEWNVSVTRNPKFNGESFIKTEL	SW	0	0	id_50_5413
BKP1_000572	tr|A0A0E1U1V7|A0A0E1U1V7_BURPE Uncharacterized protein OS=Burkholderia pseudomallei 576 OX=557724 GN=BUC_2889 PE=4 SV=1_022_052	A0A0E1U1V7	Uniprot	22	52	GERAGADGARPPREAAGESRARRKGAKEGR	SW	0	0	id_50_20487
BKP1_000573	tr|A0A0E1U1V7|A0A0E1U1V7_BURPE Uncharacterized protein OS=Burkholderia pseudomallei 576 OX=557724 GN=BUC_2889 PE=4 SV=1_049_079	A0A0E1U1V7	Uniprot	49	79	EGRTRGRAVSAVSAGGGLRGEFARSSRMIA	SW	0	1	id_50_20487
BKP1_000574	tr|C4KQJ0|C4KQJ0_BURPE Uncharacterized protein OS=Burkholderia pseudomallei MSHR346 OX=536230 GN=GBP346_A2749 PE=4 SV=1_0019	C4KQJ0	Uniprot	6	36	RGAARRRGGEATRRRGGERAGADGARPPRK	SC	0	0	id_50_20487
BKP1_000575	tr|C4KQJ0|C4KQJ0_BURPE Uncharacterized protein OS=Burkholderia pseudomallei MSHR346 OX=536230 GN=GBP346_A2749 PE=4 SV=1_0036	C4KQJ0	Uniprot	27	57	ADGARPPRKAAGESRARRKGAKEGRTRGRA	SC	0	0	id_50_20487
BKP1_000576	tr|A0A0E1RZC5|A0A0E1RZC5_BURPE Cyclic peptide ABC transporter, ATP-binding protein MbaE OS=Burkholderia pseudomallei 305 OX=425067 GN=BURPS305_0053 PE=4 SV=1_000_030	A0A0E1RZC5	Uniprot	0	30	MPALRSRSADPIPLLTRAPPMTDATGRLDA	SW	0	0	id_50_2180
BKP1_000577	tr|A0A0E1RZC5|A0A0E1RZC5_BURPE Cyclic peptide ABC transporter, ATP-binding protein MbaE OS=Burkholderia pseudomallei 305 OX=425067 GN=BURPS305_0053 PE=4 SV=1_022_052	A0A0E1RZC5	Uniprot	22	52	DATGRLDAPPSTDSRPAVKHARRLIVALLK	SW	0	0	id_50_2180
BKP1_000578	tr|A0A0E1RZC5|A0A0E1RZC5_BURPE Cyclic peptide ABC transporter, ATP-binding protein MbaE OS=Burkholderia pseudomallei 305 OX=425067 GN=BURPS305_0053 PE=4 SV=1_044_074	A0A0E1RZC5	Uniprot	44	74	RLIVALLKRSRGAFAIALAASVLNGASSVL	SW	0	1	id_50_2180
BKP1_000579	tr|A0A0E1RZC5|A0A0E1RZC5_BURPE Cyclic peptide ABC transporter, ATP-binding protein MbaE OS=Burkholderia pseudomallei 305 OX=425067 GN=BURPS305_0053 PE=4 SV=1_066_096	A0A0E1RZC5	Uniprot	66	96	LNGASSVLLVATLSRALSEPQAADASLAWR	SW	0	0	id_50_2180
BKP1_000580	tr|A0A0E1RZC5|A0A0E1RZC5_BURPE Cyclic peptide ABC transporter, ATP-binding protein MbaE OS=Burkholderia pseudomallei 305 OX=425067 GN=BURPS305_0053 PE=4 SV=1_088_118	A0A0E1RZC5	Uniprot	88	118	ADASLAWRFGLSAVIALVTRIVTGVLFARL	SW	0	1	id_50_2180
BKP1_000581	tr|A0A0E1RZC5|A0A0E1RZC5_BURPE Cyclic peptide ABC transporter, ATP-binding protein MbaE OS=Burkholderia pseudomallei 305 OX=425067 GN=BURPS305_0053 PE=4 SV=1_110_140	A0A0E1RZC5	Uniprot	110	140	TGVLFARLSQDTMAQLREHVARRVAAAELQ	SW	0	0	id_50_2180
BKP1_000582	tr|A0A0E1RZC5|A0A0E1RZC5_BURPE Cyclic peptide ABC transporter, ATP-binding protein MbaE OS=Burkholderia pseudomallei 305 OX=425067 GN=BURPS305_0053 PE=4 SV=1_132_162	A0A0E1RZC5	Uniprot	132	162	RVAAAELQDVERIGAAPVQSVLTDDATNVS	SW	0	0	id_50_2180
BKP1_000583	tr|A0A0E1RZC5|A0A0E1RZC5_BURPE Cyclic peptide ABC transporter, ATP-binding protein MbaE OS=Burkholderia pseudomallei 305 OX=425067 GN=BURPS305_0053 PE=4 SV=1_154_184	A0A0E1RZC5	Uniprot	154	184	TDDATNVSMLFFALPNLVMHGSIVFGSLGY	SW	0	1	id_50_2180
BKP1_000584	tr|A0A0E1RZC5|A0A0E1RZC5_BURPE Cyclic peptide ABC transporter, ATP-binding protein MbaE OS=Burkholderia pseudomallei 305 OX=425067 GN=BURPS305_0053 PE=4 SV=1_176_206	A0A0E1RZC5	Uniprot	176	206	IVFGCLGYLAWLSWPVCLLAVAAILVGSLG	SW	2	2	id_50_2180
BKP1_000585	tr|A0A0E1RZC5|A0A0E1RZC5_BURPE Cyclic peptide ABC transporter, ATP-binding protein MbaE OS=Burkholderia pseudomallei 305 OX=425067 GN=BURPS305_0053 PE=4 SV=1_198_228	A0A0E1RZC5	Uniprot	198	228	AILVGSLGYHAGDKRAIAWLEDAGRSQDKL	SW	0	0	id_50_2180
BKP1_000586	tr|A0A0E1RZC5|A0A0E1RZC5_BURPE Cyclic peptide ABC transporter, ATP-binding protein MbaE OS=Burkholderia pseudomallei 305 OX=425067 GN=BURPS305_0053 PE=4 SV=1_220_250	A0A0E1RZC5	Uniprot	220	250	AGRSQDKLFGYLGALFSGAKELKLHQARSR	SW	0	0	id_50_2180
BKP1_000587	tr|A0A0E1RZC5|A0A0E1RZC5_BURPE Cyclic peptide ABC transporter, ATP-binding protein MbaE OS=Burkholderia pseudomallei 305 OX=425067 GN=BURPS305_0053 PE=4 SV=1_242_272	A0A0E1RZC5	Uniprot	242	272	KLHQARSRQFVDGQLGAAIAEVRDHRRRAF	SW	0	0	id_50_2180
BKP1_000588	tr|A0A0E1RZC5|A0A0E1RZC5_BURPE Cyclic peptide ABC transporter, ATP-binding protein MbaE OS=Burkholderia pseudomallei 305 OX=425067 GN=BURPS305_0053 PE=4 SV=1_264_294	A0A0E1RZC5	Uniprot	264	294	RDHRRRAFSAYAIGVGWIVFLFYVFLGVAA	SW	0	0	id_50_2180
BKP1_000589	tr|A0A0E1RZC5|A0A0E1RZC5_BURPE Cyclic peptide ABC transporter, ATP-binding protein MbaE OS=Burkholderia pseudomallei 305 OX=425067 GN=BURPS305_0053 PE=4 SV=1_286_316	A0A0E1RZC5	Uniprot	286	316	YVFLGVAAFWPALGVRGDGPAASGYVVVFL	SW	0	0	id_50_2180
BKP1_000590	tr|A0A0E1RZC5|A0A0E1RZC5_BURPE Cyclic peptide ABC transporter, ATP-binding protein MbaE OS=Burkholderia pseudomallei 305 OX=425067 GN=BURPS305_0053 PE=4 SV=1_308_338	A0A0E1RZC5	Uniprot	308	338	SGYVVVFLFMLLPLDGLLNNVPTLNAARVS	SW	0	0	id_50_2180
BKP1_000591	tr|A0A0E1RZC5|A0A0E1RZC5_BURPE Cyclic peptide ABC transporter, ATP-binding protein MbaE OS=Burkholderia pseudomallei 305 OX=425067 GN=BURPS305_0053 PE=4 SV=1_330_360	A0A0E1RZC5	Uniprot	330	360	TLNAARVSLERIEKLMAQFGALRTAPPPDE	SW	0	0	id_50_2180
BKP1_000592	tr|A0A0E1RZC5|A0A0E1RZC5_BURPE Cyclic peptide ABC transporter, ATP-binding protein MbaE OS=Burkholderia pseudomallei 305 OX=425067 GN=BURPS305_0053 PE=4 SV=1_352_382	A0A0E1RZC5	Uniprot	352	382	RTAPPPDENASHEPFDTLALRGVTHSYFHE	SW	0	0	id_50_2180
BKP1_000593	tr|A0A0E1RZC5|A0A0E1RZC5_BURPE Cyclic peptide ABC transporter, ATP-binding protein MbaE OS=Burkholderia pseudomallei 305 OX=425067 GN=BURPS305_0053 PE=4 SV=1_374_404	A0A0E1RZC5	Uniprot	374	404	VTHSYFHERDERMFRVGPIDLTLKPGELVF	SW	0	0	id_50_2180
BKP1_000594	tr|A0A0E1RZC5|A0A0E1RZC5_BURPE Cyclic peptide ABC transporter, ATP-binding protein MbaE OS=Burkholderia pseudomallei 305 OX=425067 GN=BURPS305_0053 PE=4 SV=1_396_426	A0A0E1RZC5	Uniprot	396	426	LKPGELVFLVGGNGSGKTTLAKVLTGLYEP	SW	0	0	id_50_2180
BKP1_000595	tr|A0A0E1RZC5|A0A0E1RZC5_BURPE Cyclic peptide ABC transporter, ATP-binding protein MbaE OS=Burkholderia pseudomallei 305 OX=425067 GN=BURPS305_0053 PE=4 SV=1_418_448	A0A0E1RZC5	Uniprot	418	448	VLTGLYEPEGGVIELDGKPIGLAERAAYRE	SW	0	0	id_50_2180
BKP1_000596	tr|A0A0E1RZC5|A0A0E1RZC5_BURPE Cyclic peptide ABC transporter, ATP-binding protein MbaE OS=Burkholderia pseudomallei 305 OX=425067 GN=BURPS305_0053 PE=4 SV=1_440_470	A0A0E1RZC5	Uniprot	440	470	AERAAYRERFSAVFNDFHLFDALLGIVDPN	SW	0	0	id_50_2180
BKP1_000597	tr|A0A0E1RZC5|A0A0E1RZC5_BURPE Cyclic peptide ABC transporter, ATP-binding protein MbaE OS=Burkholderia pseudomallei 305 OX=425067 GN=BURPS305_0053 PE=4 SV=1_462_492	A0A0E1RZC5	Uniprot	462	492	LLGIVDPNDAARAQADARANALVAKLSLDH	SW	0	0	id_50_2180
BKP1_000598	tr|A0A0E1RZC5|A0A0E1RZC5_BURPE Cyclic peptide ABC transporter, ATP-binding protein MbaE OS=Burkholderia pseudomallei 305 OX=425067 GN=BURPS305_0053 PE=4 SV=1_484_514	A0A0E1RZC5	Uniprot	484	514	VAKLSLDHKVQVVDGAFSTRALSTGQRKRL	SW	0	0	id_50_2180
BKP1_000599	tr|A0A0E1RZC5|A0A0E1RZC5_BURPE Cyclic peptide ABC transporter, ATP-binding protein MbaE OS=Burkholderia pseudomallei 305 OX=425067 GN=BURPS305_0053 PE=4 SV=1_506_536	A0A0E1RZC5	Uniprot	506	536	STGQRKRLALVVAYLEDRPLYLFDEWAADQ	SW	0	0	id_50_2180
BKP1_000600	tr|A0A0E1RZC5|A0A0E1RZC5_BURPE Cyclic peptide ABC transporter, ATP-binding protein MbaE OS=Burkholderia pseudomallei 305 OX=425067 GN=BURPS305_0053 PE=4 SV=1_528_558	A0A0E1RZC5	Uniprot	528	558	FDEWAADQDPAFKAVFYEQLLPELRARGKT	SW	0	0	id_50_2180
BKP1_000601	tr|A0A0E1RZC5|A0A0E1RZC5_BURPE Cyclic peptide ABC transporter, ATP-binding protein MbaE OS=Burkholderia pseudomallei 305 OX=425067 GN=BURPS305_0053 PE=4 SV=1_550_580	A0A0E1RZC5	Uniprot	550	580	ELRARGKTVIVISHDDRYFPIADRVLKLDN	SW	0	0	id_50_2180
BKP1_000602	tr|A0A0E1RZC5|A0A0E1RZC5_BURPE Cyclic peptide ABC transporter, ATP-binding protein MbaE OS=Burkholderia pseudomallei 305 OX=425067 GN=BURPS305_0053 PE=4 SV=1_571_601	A0A0E1RZC5	Uniprot	571	601	ADRVLKLDNGIIVSETFGARHAALANGTEG	SW	0	0	id_50_2180
BKP1_000603	WP_038753938.1 AAA family ATPase [Burkholderia pseudomallei]_000_030	WP_038753938.1	GenBank	0	30	MKLQSIRLSGFLSFGPEPTELTLNDITYLI	SW	0	0	id_50_1752
BKP1_000604	WP_038753938.1 AAA family ATPase [Burkholderia pseudomallei]_022_052	WP_038753938.1	GenBank	22	52	LNDITYLIGPNGSGKTAALQALSRLFAFDP	SW	0	1	id_50_1752
BKP1_000605	WP_038753938.1 AAA family ATPase [Burkholderia pseudomallei]_044_074	WP_038753938.1	GenBank	44	74	SRLFAFDPSLRRIQRSDFHVPYDEDAVPDE	SW	0	1	id_50_1752
BKP1_000606	WP_038753938.1 AAA family ATPase [Burkholderia pseudomallei]_066_096	WP_038753938.1	GenBank	66	96	DEDAVPDERQLWLEADFVFPELEADGESAT	SW	0	0	id_50_1752
BKP1_000607	WP_038753938.1 AAA family ATPase [Burkholderia pseudomallei]_088_118	WP_038753938.1	GenBank	88	118	EADGESATVAPHFSHMRLDTADGLPRVRYR	SW	0	0	id_50_1752
BKP1_000608	WP_038753938.1 AAA family ATPase [Burkholderia pseudomallei]_110_140	WP_038753938.1	GenBank	110	140	GLPRVRYRLSATMGVDGDIEETLVYVLDLN	SW	0	0	id_50_1752
BKP1_000609	WP_038753938.1 AAA family ATPase [Burkholderia pseudomallei]_132_162	WP_038753938.1	GenBank	132	162	LVYVLDLNSDGSPMTTAQVPRVERNHVQVH	SW	0	0	id_50_1752
BKP1_000610	WP_038753938.1 AAA family ATPase [Burkholderia pseudomallei]_154_184	WP_038753938.1	GenBank	154	184	ERNHVQVHYLPARRDPAEHIAYGTNALLGR	SW	0	0	id_50_1752
BKP1_000611	WP_038753938.1 AAA family ATPase [Burkholderia pseudomallei]_176_206	WP_038753938.1	GenBank	176	206	GTNALLGRMLRAVNWEDEREEVKGFTDQIS	SW	0	0	id_50_1752
BKP1_000612	WP_038753938.1 AAA family ATPase [Burkholderia pseudomallei]_198_228	WP_038753938.1	GenBank	198	228	KGFTDQISGSLAANRSVAALSESLKATWST	SW	0	0	id_50_1752
BKP1_000613	WP_038753938.1 AAA family ATPase [Burkholderia pseudomallei]_220_250	WP_038753938.1	GenBank	220	250	SLKATWSTLHKGSFFADPHITFVASEIEAL	SW	0	0	id_50_1752
BKP1_000614	WP_038753938.1 AAA family ATPase [Burkholderia pseudomallei]_242_272	WP_038753938.1	GenBank	242	272	VASEIEALLRHLSVSFSPGHDEELVDFSRL	SW	0	0	id_50_1752
BKP1_000615	WP_038753938.1 AAA family ATPase [Burkholderia pseudomallei]_264_294	WP_038753938.1	GenBank	264	294	ELVDFSRLSDGQKSMLYLSLVLSAQSIGRA	SW	0	0	id_50_1752
BKP1_000616	WP_038753938.1 AAA family ATPase [Burkholderia pseudomallei]_286_316	WP_038753938.1	GenBank	286	316	SAQSIGRAVLAGEDDSFDPDKLRPPVFTIV	SW	0	0	id_50_1752
BKP1_000617	WP_038753938.1 AAA family ATPase [Burkholderia pseudomallei]_308_338	WP_038753938.1	GenBank	308	338	RPPVFTIVALEEPENSLSPHYLGRIVNALV	SW	0	0	id_50_1752
BKP1_000618	WP_038753938.1 AAA family ATPase [Burkholderia pseudomallei]_330_360	WP_038753938.1	GenBank	330	360	GRIVNALVAMTGNEDAQALIATHAPSMLRR	SW	0	0	id_50_1752
BKP1_000619	WP_038753938.1 AAA family ATPase [Burkholderia pseudomallei]_352_382	WP_038753938.1	GenBank	352	382	HAPSMLRRVDPKHIRYLRLTDERTTKITRI	SW	0	0	id_50_1752
BKP1_000620	WP_038753938.1 AAA family ATPase [Burkholderia pseudomallei]_374_404	WP_038753938.1	GenBank	374	404	RTTKITRIRMPKKTDEAHKFVREAVQAYPE	SW	0	0	id_50_1752
BKP1_000621	WP_038753938.1 AAA family ATPase [Burkholderia pseudomallei]_396_426	WP_038753938.1	GenBank	396	426	EAVQAYPEIYFSRLVVLGEGDSEEIVLPRI	SW	0	0	id_50_1752
BKP1_000622	WP_038753938.1 AAA family ATPase [Burkholderia pseudomallei]_418_448	WP_038753938.1	GenBank	418	448	EEIVLPRILRAKGIPVDESAVTIAPLGGRH	SW	0	0	id_50_1752
BKP1_000623	WP_038753938.1 AAA family ATPase [Burkholderia pseudomallei]_440_470	WP_038753938.1	GenBank	440	470	IAPLGGRHVNHFWRLLSALEIPHLTLLDLD	SW	0	0	id_50_1752
BKP1_000624	WP_038753938.1 AAA family ATPase [Burkholderia pseudomallei]_462_492	WP_038753938.1	GenBank	462	492	HLTLLDLDVARYQGGWGRIKYVNDQLGEYA	SW	0	0	id_50_1752
BKP1_000625	WP_038753938.1 AAA family ATPase [Burkholderia pseudomallei]_484_514	WP_038753938.1	GenBank	484	514	NDQLGEYAPSKTLPPDHSVPDWNSAEHKVR	SW	0	0	id_50_1752
BKP1_000626	WP_038753938.1 AAA family ATPase [Burkholderia pseudomallei]_506_536	WP_038753938.1	GenBank	506	536	NSAEHKVRDYDNYLDKLESRDVFFSYPMDL	SW	0	0	id_50_1752
BKP1_000627	WP_038753938.1 AAA family ATPase [Burkholderia pseudomallei]_528_558	WP_038753938.1	GenBank	528	558	FFSYPMDLDFAMLLSYPGKYGVESKPPSEI	SW	0	0	id_50_1752
BKP1_000628	WP_038753938.1 AAA family ATPase [Burkholderia pseudomallei]_550_580	WP_038753938.1	GenBank	550	580	ESKPPSEITIKAVLGDSYHDAKQYTADELG	SW	0	0	id_50_1752
BKP1_000629	WP_038753938.1 AAA family ATPase [Burkholderia pseudomallei]_572_602	WP_038753938.1	GenBank	572	602	QYTADELGLFGTYHKRFKLGSKPAAHIEAL	SW	0	0	id_50_1752
BKP1_000630	WP_038753938.1 AAA family ATPase [Burkholderia pseudomallei]_594_624	WP_038753938.1	GenBank	594	624	PAAHIEALAQLTDKQLLEDMPESLSRLADA	SW	0	0	id_50_1752
BKP1_000631	WP_038753938.1 AAA family ATPase [Burkholderia pseudomallei]_604_634	WP_038753938.1	GenBank	604	634	LTDKQLLEDMPESLSRLADAVIAKLEELPE	SW	0	0	id_50_1752
BKP1_000632	WP_244362369.1 AAA family ATPase [Burkholderia pseudomallei]_0109	WP_244362369.1	GenBank	573	603	KAPTDSNIKAVLGDSHHDASQYNANELGLF	SC	0	0	id_50_1752
BKP1_000633	WP_244362369.1 AAA family ATPase [Burkholderia pseudomallei]_0475	WP_244362369.1	GenBank	519	549	KDYSIPDWNSTKHKVRDYNNYLQALESRDV	SC	0	0	id_50_1752
BKP1_000634	WP_244362369.1 AAA family ATPase [Burkholderia pseudomallei]_0219	WP_244362369.1	GenBank	221	251	FTDQISESLAANPSIAALSESLKTTWGTLH	SC	0	0	id_50_1752
BKP1_000635	WP_244362369.1 AAA family ATPase [Burkholderia pseudomallei]_0363	WP_244362369.1	GenBank	612	642	GSKPAAHIDALAKLNDEELLDDMPASLSRL	SC	0	0	id_50_1752
BKP1_000636	WP_244362369.1 AAA family ATPase [Burkholderia pseudomallei]_0546	WP_244362369.1	GenBank	91	121	VPDERQLWIEADFVFPELEEDGDNATVAPH	SC	0	0	id_50_1752
BKP1_000637	WP_244362369.1 AAA family ATPase [Burkholderia pseudomallei]_0257	WP_244362369.1	GenBank	499	529	GRIKYVNDQMGEYAPSKTLPKDYSIPDWNS	SC	0	0	id_50_1752
BKP1_000638	WP_244362369.1 AAA family ATPase [Burkholderia pseudomallei]_0089	WP_244362369.1	GenBank	555	585	DLDFAMLLSFPDEYGVESKAPTDSNIKAVL	SC	0	0	id_50_1752
BKP1_000639	WP_244362369.1 AAA family ATPase [Burkholderia pseudomallei]_0332	WP_244362369.1	GenBank	378	408	LRRVDPQHIRYLRLTDERTTKVTRIRMPKK	SC	0	0	id_50_1752
BKP1_000640	WP_244362369.1 AAA family ATPase [Burkholderia pseudomallei]_0265	WP_244362369.1	GenBank	111	141	DGDNATVAPHFSHMRLDSADGSPRVRYRLS	SC	0	0	id_50_1752
BKP1_000641	WP_244362369.1 AAA family ATPase [Burkholderia pseudomallei]_0040	WP_244362369.1	GenBank	152	182	TLVYVLDLNGDGSPLTTAQVPRVERNHVQV	SC	0	0	id_50_1752
BKP1_000642	WP_041193243.1 AAA family ATPase [Burkholderia pseudomallei]_0337	WP_041193243.1	GenBank	89	119	LNEDDAGEEELPAVPGNFAHMQLLAEDGPV	SC	0	0	id_50_1752
BKP1_000643	WP_041193243.1 AAA family ATPase [Burkholderia pseudomallei]_0190	WP_041193243.1	GenBank	355	385	LVATHSPALLRRVSPDSVRYLRLNENRKTI	SC	0	0	id_50_1752
BKP1_000644	WP_041193243.1 AAA family ATPase [Burkholderia pseudomallei]_0170	WP_041193243.1	GenBank	115	145	DGPVQVRFRLKATIDQDGDIEESFTYVTKV	SC	0	0	id_50_1752
BKP1_000645	WP_041193243.1 AAA family ATPase [Burkholderia pseudomallei]_0211	WP_041193243.1	GenBank	174	204	DPADHISYSANALLGRALRSADWSTEREQI	SC	0	0	id_50_1752
BKP1_000646	WP_041193243.1 AAA family ATPase [Burkholderia pseudomallei]_0208	WP_041193243.1	GenBank	54	84	RKVSRSDFHIPVDEAPEDAPDERKLWIEAD	SC	0	0	id_50_1752
BKP1_000647	WP_041193243.1 AAA family ATPase [Burkholderia pseudomallei]_0154	WP_041193243.1	GenBank	506	536	QEEIDGIPKWNDEQGILIDDDGWIERLENF	SC	0	0	id_50_1752
BKP1_000648	WP_041193243.1 AAA family ATPase [Burkholderia pseudomallei]_0105	WP_041193243.1	GenBank	386	416	KRIELPEDESAQKFVREGVQAFPELYFSRL	SC	0	0	id_50_1752
BKP1_000649	WP_041193243.1 AAA family ATPase [Burkholderia pseudomallei]_0133	WP_041193243.1	GenBank	567	597	PDEETIKSVLGKKHDVLGGQYSEEEQSYFD	SC	0	0	id_50_1752
BKP1_000650	WP_041193243.1 AAA family ATPase [Burkholderia pseudomallei]_0026	WP_041193243.1	GenBank	219	249	AIEGIAEALTGQWSDLHKGAYYSSPSVSFA	SC	0	0	id_50_1752
BKP1_000651	WP_041193243.1 AAA family ATPase [Burkholderia pseudomallei]_0597	WP_041193243.1	GenBank	32	62	NGTGKTAVLQALARMFSLDPSQRKVSRSDF	SC	0	0	id_50_1752
BKP1_000652	WP_041193243.1 AAA family ATPase [Burkholderia pseudomallei]_0469	WP_041193243.1	GenBank	532	562	LENFGVFFSAPLDLDFLMMTTYPDAYLIEA	SC	0	0	id_50_1752
BKP1_000653	WP_244362369.1 AAA family ATPase [Burkholderia pseudomallei]_0315	WP_244362369.1	GenBank	200	230	ALLGRMLRAVNWESEREEVKGFTDQISESL	SC	0	0	id_50_1752
BKP1_000654	WP_041193243.1 AAA family ATPase [Burkholderia pseudomallei]_0379	WP_041193243.1	GenBank	197	227	STEREQISVLTGQISESLTGNAAIEGIAEA	SC	0	0	id_50_1752
BKP1_000655	WP_041193243.1 AAA family ATPase [Burkholderia pseudomallei]_0057	WP_041193243.1	GenBank	600	630	AKFKLGSKPTWHIRAMSSMDDQELVDEMPE	SC	0	0	id_50_1752
BKP1_000656	WP_041193243.1 AAA family ATPase [Burkholderia pseudomallei]_0584	WP_041193243.1	GenBank	297	327	GSKVLSGELGTAFDIDKLRPAVFTLIAIEE	SC	0	0	id_50_1752
BKP1_000657	WP_041193243.1 AAA family ATPase [Burkholderia pseudomallei]_0472	WP_041193243.1	GenBank	244	274	SVSFARNEIENLLRHLSVGFSPGHGESVVD	SC	0	0	id_50_1752
BKP1_000658	WP_041193243.1 AAA family ATPase [Burkholderia pseudomallei]_0576	WP_041193243.1	GenBank	480	510	QGGWGRIRYAANQLLKYADVSDNDLTQEEI	SC	0	0	id_50_1752
BKP1_000659	WP_041193243.1 AAA family ATPase [Burkholderia pseudomallei]_0424	WP_041193243.1	GenBank	137	167	SFTYVTKVGDDGSPLEESRVSKQDRNAIQV	SC	0	0	id_50_1752
BKP1_000660	WP_041193243.1 AAA family ATPase [Burkholderia pseudomallei]_0136	WP_041193243.1	GenBank	9	39	NFRSFGSDLAEIELDDMTFLLGPNGTGKTA	SC	0	0	id_50_1752
BKP1_000661	tr|A0A0E1TW34|A0A0E1TW34_BURPE Uncharacterized protein OS=Burkholderia pseudomallei 576 OX=557724 GN=BUC_6896 PE=4 SV=1_000_030	A0A0E1TW34	Uniprot	0	30	MPGVARRAATRSRPPGNGRIARLATRGARA	SW	0	0	id_50_21872
BKP1_000662	tr|A0A0E1TW34|A0A0E1TW34_BURPE Uncharacterized protein OS=Burkholderia pseudomallei 576 OX=557724 GN=BUC_6896 PE=4 SV=1_022_052	A0A0E1TW34	Uniprot	22	52	LATRGARARNRHPTRGVRTRVDHAGEKTLA	SW	0	0	id_50_21872
BKP1_000663	tr|A0A0E1TW34|A0A0E1TW34_BURPE Uncharacterized protein OS=Burkholderia pseudomallei 576 OX=557724 GN=BUC_6896 PE=4 SV=1_038_068	A0A0E1TW34	Uniprot	38	68	VRTRVDHAGEKTLASRREEMVLRGSRAENE	SW	0	0	id_50_21872
BKP1_000664	WP_122656677.1 AAA family ATPase [Burkholderia pseudomallei]_000_030	WP_122656677.1	GenBank	0	30	MSDQYTYARFWRSALQVNPVGYNETYRGAD	SW	0	1	id_50_814
BKP1_000665	WP_122656677.1 AAA family ATPase [Burkholderia pseudomallei]_022_052	WP_122656677.1	GenBank	22	52	NETYRGADHGLGEDGYNKALLQKSLELQIS	SW	0	1	id_50_814
BKP1_000666	WP_122656677.1 AAA family ATPase [Burkholderia pseudomallei]_044_074	WP_122656677.1	GenBank	44	74	KSLELQISVVGLADHGSVASVDALRQVLQP	SW	0	1	id_50_814
BKP1_000667	WP_122656677.1 AAA family ATPase [Burkholderia pseudomallei]_066_096	WP_122656677.1	GenBank	66	96	ALRQVLQPHGIVVFPGFEIASNDKTHYVSL	SW	0	1	id_50_814
BKP1_000668	WP_122656677.1 AAA family ATPase [Burkholderia pseudomallei]_088_118	WP_122656677.1	GenBank	88	118	DKTHYVSLFSEQTTGQQLERYLGSLDLLDP	SW	0	1	id_50_814
BKP1_000669	WP_122656677.1 AAA family ATPase [Burkholderia pseudomallei]_110_140	WP_122656677.1	GenBank	110	140	GSLDLLDPTDGVRPSRLSSEQLIEKVDQLG	SW	0	0	id_50_814
BKP1_000670	WP_122656677.1 AAA family ATPase [Burkholderia pseudomallei]_132_162	WP_122656677.1	GenBank	132	162	IEKVDQLGGFIYAAHSTSDSGLLKNRLNHV	SW	0	1	id_50_814
BKP1_000671	WP_122656677.1 AAA family ATPase [Burkholderia pseudomallei]_154_184	WP_122656677.1	GenBank	154	184	LKNRLNHVWKLPKLRAAQIPGPIDDLAGVE	SW	0	0	id_50_814
BKP1_000672	WP_122656677.1 AAA family ATPase [Burkholderia pseudomallei]_176_206	WP_122656677.1	GenBank	176	206	IDDLAGVEGNFYRKVLLNKDDAYRRERPVA	SW	0	0	id_50_814
BKP1_000673	WP_122656677.1 AAA family ATPase [Burkholderia pseudomallei]_198_228	WP_122656677.1	GenBank	198	228	YRRERPVAVINAKDVAKPEDLQQPGATSLI	SW	0	0	id_50_814
BKP1_000674	WP_122656677.1 AAA family ATPase [Burkholderia pseudomallei]_220_250	WP_122656677.1	GenBank	220	250	QPGATSLIKMTRPNFAAFKVAFLDPGSRVR	SW	0	1	id_50_814
BKP1_000675	WP_122656677.1 AAA family ATPase [Burkholderia pseudomallei]_242_272	WP_122656677.1	GenBank	242	272	LDPGSRVRLNSQRAQSPIGKVIHMTVVGGY	SW	0	0	id_50_814
BKP1_000676	WP_122656677.1 AAA family ATPase [Burkholderia pseudomallei]_264_294	WP_122656677.1	GenBank	264	294	HMTVVGGYLDGVRVDFSDHLNTVIGGRGTG	SW	0	0	id_50_814
BKP1_000677	WP_122656677.1 AAA family ATPase [Burkholderia pseudomallei]_286_316	WP_122656677.1	GenBank	286	316	VIGGRGTGKSTLLESLRYALDFPPKGKQAQ	SW	0	1	id_50_814
BKP1_000678	WP_122656677.1 AAA family ATPase [Burkholderia pseudomallei]_308_338	WP_122656677.1	GenBank	308	338	PPKGKQAQKLHQDIIKENLGRSAGRVELTV	SW	0	0	id_50_814
BKP1_000679	WP_122656677.1 AAA family ATPase [Burkholderia pseudomallei]_330_360	WP_122656677.1	GenBank	330	360	AGRVELTVVSSAQNGKQYAISRRYGEPPMV	SW	0	0	id_50_814
BKP1_000680	WP_122656677.1 AAA family ATPase [Burkholderia pseudomallei]_352_382	WP_122656677.1	GenBank	352	382	RYGEPPMVRDMDDNVSTLLPRDLLPGVDIY	SW	0	0	id_50_814
BKP1_000681	WP_122656677.1 AAA family ATPase [Burkholderia pseudomallei]_374_404	WP_122656677.1	GenBank	374	404	LLPGVDIYGQNEIYELAQDETSRVQLLDRF	SW	0	0	id_50_814
BKP1_000682	WP_122656677.1 AAA family ATPase [Burkholderia pseudomallei]_396_426	WP_122656677.1	GenBank	396	426	RVQLLDRFLPQDGGYEAKSADVHRRLKENQ	SW	0	0	id_50_814
BKP1_000683	WP_122656677.1 AAA family ATPase [Burkholderia pseudomallei]_418_448	WP_122656677.1	GenBank	418	448	HRRLKENQQTLAKSLTDLDELKAQVERLPK	SW	0	0	id_50_814
BKP1_000684	WP_122656677.1 AAA family ATPase [Burkholderia pseudomallei]_440_470	WP_122656677.1	GenBank	440	470	AQVERLPKLEEQLRGFDELGIKEKLANTSL	SW	0	0	id_50_814
BKP1_000685	WP_122656677.1 AAA family ATPase [Burkholderia pseudomallei]_462_492	WP_122656677.1	GenBank	462	492	EKLANTSLLAREREIAKTASESVQGFRDAI	SW	0	0	id_50_814
BKP1_000686	WP_122656677.1 AAA family ATPase [Burkholderia pseudomallei]_484_514	WP_122656677.1	GenBank	484	514	VQGFRDAIANFRDSLPDLAFINDEALDGLP	SW	0	0	id_50_814
BKP1_000687	WP_122656677.1 AAA family ATPase [Burkholderia pseudomallei]_506_536	WP_122656677.1	GenBank	506	536	DEALDGLPDAAQLLAMRTTLDGIKQSLTTH	SW	0	0	id_50_814
BKP1_000688	WP_122656677.1 AAA family ATPase [Burkholderia pseudomallei]_528_558	WP_122656677.1	GenBank	528	558	IKQSLTTHLAAMQALLDDGAEQFATQQEAW	SW	0	0	id_50_814
BKP1_000689	WP_122656677.1 AAA family ATPase [Burkholderia pseudomallei]_550_580	WP_122656677.1	GenBank	550	580	FATQQEAWQQTVKEHDAVLEKALRTLPATA	SW	0	0	id_50_814
BKP1_000690	WP_122656677.1 AAA family ATPase [Burkholderia pseudomallei]_572_602	WP_122656677.1	GenBank	572	602	LRTLPATAGKSGQEVGAAYQRLMIEIERIK	SW	0	0	id_50_814
BKP1_000691	WP_122656677.1 AAA family ATPase [Burkholderia pseudomallei]_594_624	WP_122656677.1	GenBank	594	624	MIEIERIKPMKSRVATHESQFDALRQERRN	SW	0	0	id_50_814
BKP1_000692	WP_122656677.1 AAA family ATPase [Burkholderia pseudomallei]_616_646	WP_122656677.1	GenBank	616	646	ALRQERRNLLAELSDLRGQRIRALQKAARK	SW	0	0	id_50_814
BKP1_000693	WP_122656677.1 AAA family ATPase [Burkholderia pseudomallei]_638_668	WP_122656677.1	GenBank	638	668	ALQKAARKLSKRLEGKLKVEIVPEADRTPL	SW	0	0	id_50_814
BKP1_000694	WP_122656677.1 AAA family ATPase [Burkholderia pseudomallei]_660_690	WP_122656677.1	GenBank	660	690	PEADRTPLMTFLLGSKLDGVGEKRLSFVHE	SW	0	1	id_50_814
BKP1_000695	WP_122656677.1 AAA family ATPase [Burkholderia pseudomallei]_682_712	WP_122656677.1	GenBank	682	712	KRLSFVHEAETISPLSFAQSIQKGAAHVQL	SW	0	0	id_50_814
BKP1_000696	WP_122656677.1 AAA family ATPase [Burkholderia pseudomallei]_704_734	WP_122656677.1	GenBank	704	734	KGAAHVQLDWGVTQIVADALTKLQSTQLME	SW	0	0	id_50_814
BKP1_000697	WP_122656677.1 AAA family ATPase [Burkholderia pseudomallei]_726_756	WP_122656677.1	GenBank	726	756	LQSTQLMELEALELEHRVDIFLNVAHGQAD	SW	0	0	id_50_814
BKP1_000698	WP_122656677.1 AAA family ATPase [Burkholderia pseudomallei]_748_778	WP_122656677.1	GenBank	748	778	NVAHGQADPVFRPLNKLSTGQQSTAILHML	SW	0	1	id_50_814
BKP1_000699	WP_122656677.1 AAA family ATPase [Burkholderia pseudomallei]_770_800	WP_122656677.1	GenBank	770	800	STAILHMLLLENVDPLLMDQPEDNLDNAFI	SW	0	0	id_50_814
BKP1_000700	WP_122656677.1 AAA family ATPase [Burkholderia pseudomallei]_792_822	WP_122656677.1	GenBank	792	822	DNLDNAFIADRIVTELREAKTSRQFVFATH	SW	0	0	id_50_814
BKP1_000701	WP_122656677.1 AAA family ATPase [Burkholderia pseudomallei]_814_844	WP_122656677.1	GenBank	814	844	RQFVFATHNANIPVFGDAEWIGVFTAAENH	SW	0	0	id_50_814
BKP1_000702	WP_122656677.1 AAA family ATPase [Burkholderia pseudomallei]_836_866	WP_122656677.1	GenBank	836	866	VFTAAENHGSLGLEAQGSIDVPVIRDQVAS	SW	0	1	id_50_814
BKP1_000703	WP_122656677.1 AAA family ATPase [Burkholderia pseudomallei]_854_884	WP_122656677.1	GenBank	854	884	IDVPVIRDQVASILEGGRDAFIQRKEKYEF	SW	0	0	id_50_814
BKP1_000704	WP_122804643.1 AAA family ATPase [Burkholderia pseudomallei]_0528	WP_122804643.1	GenBank	478	508	KTASESVQSFRDAIANLRDSLPDLAFINDE	SC	0	0	id_50_814
BKP1_000705	WP_055311991.1 AAA family ATPase, partial [Burkholderia pseudomallei]_0039	WP_055311991.1	GenBank	542	572	LLDDKAGQFTTQHDAWQQAIQAHDVELEKA	SC	0	0	id_50_814
BKP1_000706	WP_055311991.1 AAA family ATPase, partial [Burkholderia pseudomallei]_0349	WP_055311991.1	GenBank	246	276	SRVRLNSQQAQSPIGKVVRMTVAGGYLDGV	SC	0	0	id_50_814
BKP1_000707	WP_055311991.1 AAA family ATPase, partial [Burkholderia pseudomallei]_0014	WP_055311991.1	GenBank	478	508	KTATEGVQSFRDALTDLRDSLPDLDFINDE	SC	0	0	id_50_814
BKP1_000708	WP_055311991.1 AAA family ATPase, partial [Burkholderia pseudomallei]_0114	WP_055311991.1	GenBank	520	550	AMRTTLDGLKQGFTGHLTAMQALLDDKAGQ	SC	0	0	id_50_814
BKP1_000709	WP_055311991.1 AAA family ATPase, partial [Burkholderia pseudomallei]_0443	WP_055311991.1	GenBank	418	448	HRRLKDNQQKLTKSLTDLDELNAQVERLPK	SC	0	0	id_50_814
BKP1_000710	WP_223854500.1 MULTISPECIES: hypothetical protein [Burkholderia]_000_030	WP_223854500.1	GenBank	0	30	MSMKEGGEFDRRSIVLMKMIFKYRNFNRSF	SW	0	1	id_50_9008
BKP1_000711	WP_223854500.1 MULTISPECIES: hypothetical protein [Burkholderia]_022_052	WP_223854500.1	GenBank	22	52	YRNFNRSFFGNDSDGIENKMGMIFAIFIRR	SW	0	1	id_50_9008
BKP1_000712	WP_223854500.1 MULTISPECIES: hypothetical protein [Burkholderia]_044_074	WP_223854500.1	GenBank	44	74	IFAIFIRRRPGSAGFLWGMDEALAVQFRAA	SW	0	0	id_50_9008
BKP1_000713	WP_223854500.1 MULTISPECIES: hypothetical protein [Burkholderia]_066_096	WP_223854500.1	GenBank	66	96	LAVQFRAAGKEKRATGARMATIRAEEGRAA	SW	0	0	id_50_9008
BKP1_000714	WP_223854500.1 MULTISPECIES: hypothetical protein [Burkholderia]_110_140	WP_223854500.1	GenBank	110	140	HVARLAKRAFVARSAPRGGREAAAISGDAR	SW	0	1	id_50_9008
BKP1_000715	WP_223854500.1 MULTISPECIES: hypothetical protein [Burkholderia]_132_162	WP_223854500.1	GenBank	132	162	AAISGDARSGSTDVRRRRSARASVTAGRRG	SW	0	1	id_50_9008
BKP1_000716	WP_223854500.1 MULTISPECIES: hypothetical protein [Burkholderia]_154_184	WP_223854500.1	GenBank	154	184	CVTAGRRGRRAVRKPVPLPVDVQRRADACS	SW	2	2	id_50_9008
BKP1_000717	WP_223854500.1 MULTISPECIES: hypothetical protein [Burkholderia]_176_206	WP_223854500.1	GenBank	176	206	QRRADASSGRFGRGLPFRAMRATRAARIVH	SW	0	1	id_50_9008
BKP1_000718	WP_223854500.1 MULTISPECIES: hypothetical protein [Burkholderia]_188_218	WP_223854500.1	GenBank	188	218	RGLPFRAMRATRAARIVHHTSRITPRRTST	SW	0	1	id_50_9008
BKP1_000719	WP_235366439.1 hypothetical protein [Burkholderia pseudomallei]_0176	WP_235366439.1	GenBank	151	181	GARLRHRRATRTPRRAQTGSASGRRAKARG	SC	0	0	id_50_9008
BKP1_000720	WP_235364083.1 hypothetical protein [Burkholderia pseudomallei]_0000	WP_235364083.1	GenBank	32	62	NDSVGIENEMGMIFAILFDGGPAVRDFYGG	SC	0	0	id_50_9008
BKP1_000721	WP_235366439.1 hypothetical protein [Burkholderia pseudomallei]_0182	WP_235366439.1	GenBank	192	222	VSRDARHASGAHHASHLTHHTATHMYLITT	SC	0	0	id_50_9008
BKP1_000722	tr|A0A8A4DS24|A0A8A4DS24_BURPE Uncharacterized protein OS=Burkholderia pseudomallei OX=28450 GN=J3D99_20280 PE=4 SV=1_0153	A0A8A4DS24	Uniprot	233	263	RFGRGLPFRAMRATRAARIMHHTSRITPRR	SC	0	0	id_50_9008
BKP1_000723	WP_232469839.1 hypothetical protein [Burkholderia pseudomallei]_0139	WP_232469839.1	GenBank	114	144	WRSAPSWRDARRAGQGGGRHIRRRKIRVDG	SC	0	0	id_50_9008
BKP1_000724	WP_270958812.1 hypothetical protein [Burkholderia pseudomallei]_0084	WP_270958812.1	GenBank	181	211	VQRALRARIAVSRDARHASGAHRASHLTHH	SC	0	0	id_50_9008
BKP1_000725	WP_229655196.1 hypothetical protein [Burkholderia pseudomallei]_0181	WP_229655196.1	GenBank	104	134	VPGEPRMLRGWRSAPSWRDARRAGGREAAA	SC	0	0	id_50_9008
BKP1_000726	WP_241537884.1 hypothetical protein [Burkholderia pseudomallei]_0188	WP_241537884.1	GenBank	29	59	FFGNDPVGIENEMGMIFAIFIRRRPGSAGF	SC	0	0	id_50_9008
BKP1_000727	tr|A0A3N8LYT3|A0A3N8LYT3_BURPE Uncharacterized protein OS=Burkholderia pseudomallei OX=28450 GN=DF122_37445 PE=4 SV=1_0018	A0A3N8LYT3	Uniprot	3	33	LKRFPHDEAPSSNGRHPYGTGRSDASEWRR	SC	0	0	id_50_9008
BKP1_000728	WP_230297685.1 hypothetical protein [Burkholderia pseudomallei]_0015	WP_230297685.1	GenBank	117	147	RAFVARYAPRGGREAAAISGDTRSGSTDVR	SC	0	0	id_50_9008
BKP1_000729	WP_243895159.1 hypothetical protein [Burkholderia pseudomallei]_0136	WP_243895159.1	GenBank	123	153	ARRAGGREAAAISGDARSGATDVRRRRSAR	SC	0	0	id_50_9008
BKP1_000730	WP_270958812.1 hypothetical protein [Burkholderia pseudomallei]_0130	WP_270958812.1	GenBank	112	142	AAGEARLRGAMRAARGQGGGRHIRRRKIRV	SC	0	0	id_50_9008
BKP1_000731	WP_235357186.1 hypothetical protein [Burkholderia pseudomallei]_0060	WP_235357186.1	GenBank	39	69	NKMGMIFAIFLFDGGPAVRDFYGGWMKRLR	SC	0	0	id_50_9008
BKP1_000732	tr|A0A8A4DS24|A0A8A4DS24_BURPE Uncharacterized protein OS=Burkholderia pseudomallei OX=28450 GN=J3D99_20280 PE=4 SV=1_0070	A0A8A4DS24	Uniprot	36	66	RVFRWSLGIYPGMSMKEGGEFDRRSIVLMK	SC	0	0	id_50_9008
BKP1_000733	WP_235366439.1 hypothetical protein [Burkholderia pseudomallei]_0147	WP_235366439.1	GenBank	146	176	STQAIGARLRHRRATRTPRRAQTGSASGRR	SC	0	0	id_50_9008
BKP1_000734	tr|A0A8A4DS24|A0A8A4DS24_BURPE Uncharacterized protein OS=Burkholderia pseudomallei OX=28450 GN=J3D99_20280 PE=4 SV=1_0222	A0A8A4DS24	Uniprot	79	109	GNDSDGIENIMGMIFAIFIRRRPGSAGFLW	SC	0	0	id_50_9008
BKP1_000735	WP_229653575.1 hypothetical protein [Burkholderia pseudomallei]_0146	WP_229653575.1	GenBank	29	59	FFGNYPVGIENEMGMIFAIFIRRRPGSAGF	SC	0	0	id_50_9008
BKP1_000736	WP_229656261.1 hypothetical protein [Burkholderia pseudomallei]_0190	WP_229656261.1	GenBank	73	103	AGKEKRATGARMATIRADEGRAAVTRVAAP	SC	0	0	id_50_9008
BKP1_000737	WP_229201377.1 hypothetical protein [Burkholderia pseudomallei]_0107	WP_229201377.1	GenBank	38	68	ENKMGMIFAIFIRRRLGSAGFLWGMDEALA	SC	0	0	id_50_9008
BKP1_000738	WP_229655196.1 hypothetical protein [Burkholderia pseudomallei]_0163	WP_229655196.1	GenBank	29	59	FFRNDSVGIENEMGMIFAIFIRRRPGSAGF	SC	0	0	id_50_9008
BKP1_000739	WP_058034632.1 GFA family protein [Burkholderia pseudomallei]_000_030	WP_058034632.1	GenBank	0	30	MSATRSIRCLRGAVGMKLTGEPAARAHCHC	SW	3	3	id_50_15059
BKP1_000740	WP_058034632.1 GFA family protein [Burkholderia pseudomallei]_022_052	WP_058034632.1	GenBank	22	52	AARAHCHCTARRDFHGVSMLSATAWPAERA	SW	2	2	id_50_15059
BKP1_000741	WP_058034632.1 GFA family protein [Burkholderia pseudomallei]_044_074	WP_058034632.1	GenBank	44	74	TAWPAERAIVVEGDVASFAHPARQMSRTFS	SW	0	1	id_50_15059
BKP1_000742	WP_058034632.1 GFA family protein [Burkholderia pseudomallei]_066_096	WP_058034632.1	GenBank	66	96	RQMSRTFCRACGETVFGTNRLGMRVVPNAI	SW	2	2	id_50_15059
BKP1_000743	WP_058034632.1 GFA family protein [Burkholderia pseudomallei]_112_142	WP_058034632.1	GenBank	112	142	MHLFYRHRIVDVRDALPKYLDGWDGPTDAA	SW	0	0	id_50_15059
BKP1_000744	WP_004540293.1 GFA family protein [Burkholderia pseudomallei]_0058	WP_004540293.1	GenBank	90	120	VVPNAIVARAADGALPDGLRPTMHLFYRHR	SC	0	0	id_50_15059
BKP1_000745	WP_060547524.1 GFA family protein [Burkholderia pseudomallei]_0085	WP_060547524.1	GenBank	112	142	MHLFYRHRIVDVRDALPKDLDGWNGPTDAA	SC	0	0	id_50_15059
BKP1_000746	WP_122888112.1 GFA family protein [Burkholderia pseudomallei]_0062	WP_122888112.1	GenBank	43	73	ATAWPAERAIVVEGDVASFAHPARRMSRTF	SC	0	0	id_50_15059
BKP1_000747	WP_043291263.1 type I restriction endonuclease [Burkholderia pseudomallei]_000_030	WP_043291263.1	GenBank	0	30	MANLSNVHTERVFEDELCEHLACLGWSVRT	SW	2	2	id_50_511
BKP1_000748	WP_043291263.1 type I restriction endonuclease [Burkholderia pseudomallei]_022_052	WP_043291263.1	GenBank	22	52	SLGWSVRTHLKDATSYTRELALFPDDLLAF	SW	0	1	id_50_511
BKP1_000749	WP_043291263.1 type I restriction endonuclease [Burkholderia pseudomallei]_044_074	WP_043291263.1	GenBank	44	74	FPDDLLAFVQETQPAEWAKFKKWHNGQSET	SW	0	0	id_50_511
BKP1_000750	WP_043291263.1 type I restriction endonuclease [Burkholderia pseudomallei]_066_096	WP_043291263.1	GenBank	66	96	WHNGQSETMFVKRVAEQLDKHGTLHLLRHG	SW	0	0	id_50_511
BKP1_000751	WP_043291263.1 type I restriction endonuclease [Burkholderia pseudomallei]_088_118	WP_043291263.1	GenBank	88	118	TLHLLRHGFKDRDAKFFLSQFRPAHKKNPQ	SW	0	0	id_50_511
BKP1_000752	WP_043291263.1 type I restriction endonuclease [Burkholderia pseudomallei]_1004_1034	WP_043291263.1	GenBank	1004	1034	DDRIFAAMQGMLAKMVYQAFAKQQDQARRA	SW	0	0	id_50_511
BKP1_000753	WP_043291263.1 type I restriction endonuclease [Burkholderia pseudomallei]_110_140	WP_043291263.1	GenBank	110	140	PAHKKNPQLWDWYDKNRLTVIRQLHYSLHN	SW	0	0	id_50_511
BKP1_000754	WP_043291263.1 type I restriction endonuclease [Burkholderia pseudomallei]_132_162	WP_043291263.1	GenBank	132	162	QLHYSLHNENSIDIVLFVNGLPVATSELKT	SW	0	0	id_50_511
BKP1_000755	WP_043291263.1 type I restriction endonuclease [Burkholderia pseudomallei]_154_184	WP_043291263.1	GenBank	154	184	VATSELKTDLTQSIKDAIVQYKKDRLPKDP	SW	0	0	id_50_511
BKP1_000756	WP_043291263.1 type I restriction endonuclease [Burkholderia pseudomallei]_176_206	WP_043291263.1	GenBank	176	206	KDRLPKDPKSKEIEPLLQFKTRALVHFAVS	SW	0	0	id_50_511
BKP1_000757	WP_043291263.1 type I restriction endonuclease [Burkholderia pseudomallei]_198_228	WP_043291263.1	GenBank	198	228	ALVHFAVSTDEVFMTTKLDGDKTFFLPFNL	SW	0	0	id_50_511
BKP1_000758	WP_043291263.1 type I restriction endonuclease [Burkholderia pseudomallei]_220_250	WP_043291263.1	GenBank	220	250	TFFLPFNLGRPDGLGGAGAGNPPAPAEHGY	SW	0	0	id_50_511
BKP1_000759	WP_043291263.1 type I restriction endonuclease [Burkholderia pseudomallei]_242_272	WP_043291263.1	GenBank	242	272	PAPAEHGYPTYYLWKLVWSKDVWLDILGNF	SW	0	0	id_50_511
BKP1_000760	WP_043291263.1 type I restriction endonuclease [Burkholderia pseudomallei]_264_294	WP_043291263.1	GenBank	264	294	WLDILGNFLHLEVKEVEDSKSGKKTAKESL	SW	0	0	id_50_511
BKP1_000761	WP_043291263.1 type I restriction endonuclease [Burkholderia pseudomallei]_286_316	WP_043291263.1	GenBank	286	316	KKTAKESLIFPRFHQLDAVLRLVKTAAEEG	SW	0	0	id_50_511
BKP1_000762	WP_043291263.1 type I restriction endonuclease [Burkholderia pseudomallei]_308_338	WP_043291263.1	GenBank	308	338	VKTAAEEGTGHTYLIQHSAGSGKSNSIAWT	SW	0	0	id_50_511
BKP1_000763	WP_043291263.1 type I restriction endonuclease [Burkholderia pseudomallei]_330_360	WP_043291263.1	GenBank	330	360	KSNSIAWTAHRLANLHNAADEKVFDSVIVI	SW	0	0	id_50_511
BKP1_000764	WP_043291263.1 type I restriction endonuclease [Burkholderia pseudomallei]_352_382	WP_043291263.1	GenBank	352	382	VFDSVIVITDRKVLDRQLQETISQFEHKAG	SW	0	0	id_50_511
BKP1_000765	WP_043291263.1 type I restriction endonuclease [Burkholderia pseudomallei]_374_404	WP_043291263.1	GenBank	374	404	SQFEHKAGVVQKIDQNSEQLAQALNSGTPI	SW	0	0	id_50_511
BKP1_000766	WP_043291263.1 type I restriction endonuclease [Burkholderia pseudomallei]_396_426	WP_043291263.1	GenBank	396	426	ALNSGTPIIVTTLQKFPFILEKVQGLKGKR	SW	0	0	id_50_511
BKP1_000767	WP_043291263.1 type I restriction endonuclease [Burkholderia pseudomallei]_418_448	WP_043291263.1	GenBank	418	448	VQGLKGKRFALIVDEAHSSQSGSAAQKLRK	SW	0	0	id_50_511
BKP1_000768	WP_043291263.1 type I restriction endonuclease [Burkholderia pseudomallei]_440_470	WP_043291263.1	GenBank	440	470	SAAQKLRKALTTEVKSKPVLAVELDGSTVE	SW	0	0	id_50_511
BKP1_000769	WP_043291263.1 type I restriction endonuclease [Burkholderia pseudomallei]_462_492	WP_043291263.1	GenBank	462	492	ELDGSTVEIPADVEIDPEDVTAEDIINQVI	SW	0	0	id_50_511
BKP1_000770	WP_043291263.1 type I restriction endonuclease [Burkholderia pseudomallei]_484_514	WP_043291263.1	GenBank	484	514	EDIINQVIASRERPQNVSYFAFTATPKAKT	SW	0	0	id_50_511
BKP1_000771	WP_043291263.1 type I restriction endonuclease [Burkholderia pseudomallei]_506_536	WP_043291263.1	GenBank	506	536	TATPKAKTMELFGRTGSDGLPQAFHVYSMR	SW	0	0	id_50_511
BKP1_000772	WP_043291263.1 type I restriction endonuclease [Burkholderia pseudomallei]_528_558	WP_043291263.1	GenBank	528	558	AFHVYSMRQAIEEGFILDVLKNYISYKMFY	SW	0	0	id_50_511
BKP1_000773	WP_043291263.1 type I restriction endonuclease [Burkholderia pseudomallei]_550_580	WP_043291263.1	GenBank	550	580	YISYKMFYKLGAEADDKLVPAMKAKKVLAR	SW	0	0	id_50_511
BKP1_000774	WP_043291263.1 type I restriction endonuclease [Burkholderia pseudomallei]_572_602	WP_043291263.1	GenBank	572	602	KAKKVLARYAVLHPYNIAQKVVVIVEHFRE	SW	0	0	id_50_511
BKP1_000775	WP_043291263.1 type I restriction endonuclease [Burkholderia pseudomallei]_594_624	WP_043291263.1	GenBank	594	624	VIVEHFREHVAAKIGGKAKAMVVTDSRKAA	SW	0	0	id_50_511
BKP1_000776	WP_043291263.1 type I restriction endonuclease [Burkholderia pseudomallei]_616_646	WP_043291263.1	GenBank	616	646	VTDSRKAAVRYKLAMDQYIKERGYENDMRA	SW	0	0	id_50_511
BKP1_000777	WP_043291263.1 type I restriction endonuclease [Burkholderia pseudomallei]_638_668	WP_043291263.1	GenBank	638	668	GYENDMRALVAFSGKVEDLESGPDEFTESN	SW	0	0	id_50_511
BKP1_000778	WP_043291263.1 type I restriction endonuclease [Burkholderia pseudomallei]_660_690	WP_043291263.1	GenBank	660	690	PDEFTESNMNPDIKGREPSEAFKEDVYRVL	SW	0	0	id_50_511
BKP1_000779	WP_043291263.1 type I restriction endonuclease [Burkholderia pseudomallei]_682_712	WP_043291263.1	GenBank	682	712	KEDVYRVLLVANKYQTGFDQPLLHTMYVDK	SW	0	0	id_50_511
BKP1_000780	WP_043291263.1 type I restriction endonuclease [Burkholderia pseudomallei]_704_734	WP_043291263.1	GenBank	704	734	LHTMYVDKRLSGVLAVQTLSRLNRTTPGKE	SW	0	0	id_50_511
BKP1_000781	WP_043291263.1 type I restriction endonuclease [Burkholderia pseudomallei]_726_756	WP_043291263.1	GenBank	726	756	NRTTPGKEDTFVLDFVNKPDEILQSFQPYY	SW	0	0	id_50_511
BKP1_000782	WP_043291263.1 type I restriction endonuclease [Burkholderia pseudomallei]_748_778	WP_043291263.1	GenBank	748	778	LQSFQPYYRAAALEDVTDPNIVHELQIKLD	SW	0	0	id_50_511
BKP1_000783	WP_043291263.1 type I restriction endonuclease [Burkholderia pseudomallei]_770_800	WP_043291263.1	GenBank	770	800	HELQIKLDKAGVYYRTEVDAFAEAFFDPKR	SW	0	0	id_50_511
BKP1_000784	WP_043291263.1 type I restriction endonuclease [Burkholderia pseudomallei]_792_822	WP_043291263.1	GenBank	792	822	EAFFDPKRKQAGLHAHLKPAADRFAELNEE	SW	0	0	id_50_511
BKP1_000785	WP_043291263.1 type I restriction endonuclease [Burkholderia pseudomallei]_814_844	WP_043291263.1	GenBank	814	844	RFAELNEEDADQFRKDLGSFLRLYDFLSQI	SW	0	0	id_50_511
BKP1_000786	WP_043291263.1 type I restriction endonuclease [Burkholderia pseudomallei]_836_866	WP_043291263.1	GenBank	836	866	LYDFLSQIINYGDADLEKLYAFGKNLMPRI	SW	0	0	id_50_511
BKP1_000787	WP_043291263.1 type I restriction endonuclease [Burkholderia pseudomallei]_858_888	WP_043291263.1	GenBank	858	888	GKNLMPRIAEKGEASSILELDSDVRLTHYR	SW	0	0	id_50_511
BKP1_000788	WP_043291263.1 type I restriction endonuclease [Burkholderia pseudomallei]_880_910	WP_043291263.1	GenBank	880	910	DVRLTHYRLQKLGEQRLDLASGEIVKLAPV	SW	0	0	id_50_511
BKP1_000789	WP_043291263.1 type I restriction endonuclease [Burkholderia pseudomallei]_902_932	WP_043291263.1	GenBank	902	932	EIVKLAPVSEAGTGKAVDDEQRKLSEIVEK	SW	0	0	id_50_511
BKP1_000790	WP_043291263.1 type I restriction endonuclease [Burkholderia pseudomallei]_924_954	WP_043291263.1	GenBank	924	954	KLSEIVEKMNDLFSGSLTEADLVGYVTTIK	SW	0	0	id_50_511
BKP1_000791	WP_043291263.1 type I restriction endonuclease [Burkholderia pseudomallei]_946_976	WP_043291263.1	GenBank	946	976	VGYVTTIKGKLLENETLAEQAANNSEHQFA	SW	0	0	id_50_511
BKP1_000792	WP_043291263.1 type I restriction endonuclease [Burkholderia pseudomallei]_968_998	WP_043291263.1	GenBank	968	998	NNSEHQFAMGDFKDILTDIIIEGQEGHNKI	SW	0	0	id_50_511
BKP1_000793	WP_043291263.1 type I restriction endonuclease [Burkholderia pseudomallei]_990_1020	WP_043291263.1	GenBank	990	1020	GQEGHNKIADQLLKDDRIFAAMQGMLAKMV	SW	0	0	id_50_511
BKP1_000794	WP_053565815.1 type I restriction endonuclease [Burkholderia pseudomallei]_0220	WP_053565815.1	GenBank	918	948	VDDDQRKLSEIVEKMNDLFSGNLTEADLVG	SC	0	0	id_50_511
BKP1_000795	WP_064459021.1 type I restriction endonuclease [Burkholderia pseudomallei]_0962	WP_064459021.1	GenBank	445	475	LRKALTSEVKNKPVLAVELDGATVEIPADV	SC	0	0	id_50_511
BKP1_000796	WP_053565815.1 type I restriction endonuclease [Burkholderia pseudomallei]_0536	WP_053565815.1	GenBank	273	303	HLEVKEVEDPKSGKKTTKEALIFPRFHQLD	SC	0	0	id_50_511
BKP1_000797	WP_208291191.1 type I restriction endonuclease [Burkholderia pseudomallei]_0566	WP_208291191.1	GenBank	666	696	SNMNPDIKGQEPSEAFKEDIFRVLLVANKY	SC	0	0	id_50_511
BKP1_000798	WP_249510221.1 type I restriction endonuclease [Burkholderia pseudomallei]_0498	WP_249510221.1	GenBank	771	801	ELQIKLDKGGVYYRTEVDAFSDAFFDPKRK	SC	0	0	id_50_511
BKP1_000799	WP_249510221.1 type I restriction endonuclease [Burkholderia pseudomallei]_0597	WP_249510221.1	GenBank	27	57	VRTHLKDATSYNRELALFPDDMLAFVQETQ	SC	0	0	id_50_511
BKP1_000800	WP_249510221.1 type I restriction endonuclease [Burkholderia pseudomallei]_0362	WP_249510221.1	GenBank	721	751	TLSRLNRTAPGKEDTFVLDFVNKPEEILQS	SC	0	0	id_50_511
BKP1_000801	WP_053565815.1 type I restriction endonuclease [Burkholderia pseudomallei]_0233	WP_053565815.1	GenBank	894	924	QRLDLASGDIVKLAPVSEAGTGKAVDDDQR	SC	0	0	id_50_511
BKP1_000802	WP_208291191.1 type I restriction endonuclease [Burkholderia pseudomallei]_0991	WP_208291191.1	GenBank	507	537	ATPKAKTMELFGRTGRDGLPHAFHVYSMRQ	SC	0	0	id_50_511
BKP1_000803	WP_053565815.1 type I restriction endonuclease [Burkholderia pseudomallei]_0225	WP_053565815.1	GenBank	158	188	ELKTDLTQSIKDAIAQYKKDRQPKDPKSKE	SC	0	0	id_50_511
BKP1_000804	WP_249510221.1 type I restriction endonuclease [Burkholderia pseudomallei]_0031	WP_249510221.1	GenBank	997	1027	IADQLLKDERIFAAMQGMLAKMVYQTFAKQ	SC	0	0	id_50_511
BKP1_000805	WP_249510221.1 type I restriction endonuclease [Burkholderia pseudomallei]_0199	WP_249510221.1	GenBank	296	326	PRFHQLDAVLRLVKSAAEEGAGHTYLIQHS	SC	0	0	id_50_511
BKP1_000806	WP_208291191.1 type I restriction endonuclease [Burkholderia pseudomallei]_0443	WP_208291191.1	GenBank	627	657	KLAMDQYIRERGYDNDMRALVAFSGKVEDL	SC	0	0	id_50_511
BKP1_000807	WP_249510221.1 type I restriction endonuclease [Burkholderia pseudomallei]_0161	WP_249510221.1	GenBank	107	137	QFRPAHKKNLQLWDWYDKNHLTVIRQLHYS	SC	0	0	id_50_511
BKP1_000808	WP_249510221.1 type I restriction endonuclease [Burkholderia pseudomallei]_0829	WP_249510221.1	GenBank	270	300	NFLHLEVKEFEDPKSGKKTTKDALIFPRFH	SC	0	0	id_50_511
BKP1_000809	WP_249510221.1 type I restriction endonuclease [Burkholderia pseudomallei]_0595	WP_249510221.1	GenBank	459	489	LAVELDGATVEVSADVEIDMEDVTAEDIIN	SC	0	0	id_50_511
BKP1_000810	WP_249510221.1 type I restriction endonuclease [Burkholderia pseudomallei]_0378	WP_249510221.1	GenBank	238	268	AGNPPAPIEHGYPTYYLWKLVWLKDVWLDI	SC	0	0	id_50_511
BKP1_000811	WP_053565815.1 type I restriction endonuclease [Burkholderia pseudomallei]_0495	WP_053565815.1	GenBank	397	427	LNSGTPIVVTTLQKFPFILEKVHGLKGKRF	SC	0	0	id_50_511
BKP1_000812	WP_053565815.1 type I restriction endonuclease [Burkholderia pseudomallei]_0580	WP_053565815.1	GenBank	230	260	PDGLGGAGAGNSPAPVEHGYPTYYLWKLVW	SC	0	0	id_50_511
BKP1_000813	WP_249510221.1 type I restriction endonuclease [Burkholderia pseudomallei]_0764	WP_249510221.1	GenBank	584	614	HPFNIAQKVVVIVEHFREHVAVKIGGKAKA	SC	0	0	id_50_511
BKP1_000814	WP_208291191.1 type I restriction endonuclease [Burkholderia pseudomallei]_0255	WP_208291191.1	GenBank	23	53	HGWSVRTHLKDSTSYTRELALFPDDLLAFV	SC	0	0	id_50_511
BKP1_000815	WP_249510221.1 type I restriction endonuclease [Burkholderia pseudomallei]_0179	WP_249510221.1	GenBank	632	662	QYIKERGYDSDMRALVAFSGKVEDLESGPD	SC	0	0	id_50_511
BKP1_000816	WP_064459021.1 type I restriction endonuclease [Burkholderia pseudomallei]_0460	WP_064459021.1	GenBank	514	544	MELFGRTGADDLPQAFHVYSMRQAIEEGFI	SC	0	0	id_50_511
BKP1_000817	WP_004524876.1 class I SAM-dependent methyltransferase [Burkholderia pseudomallei]_000_030	WP_004524876.1	GenBank	0	30	MTVHLESREAAAPGRGAPYGASADAIQYHY	SW	0	0	id_50_6869
BKP1_000818	WP_004524876.1 class I SAM-dependent methyltransferase [Burkholderia pseudomallei]_022_052	WP_004524876.1	GenBank	22	52	ADAIQYHYDIGNAFLALAQERGRNYSSAMY	SW	0	1	id_50_6869
BKP1_000819	WP_004524876.1 class I SAM-dependent methyltransferase [Burkholderia pseudomallei]_044_074	WP_004524876.1	GenBank	44	74	RNYSSAMYEEGDTHEQAQIRKLDYHIAQIR	SW	0	1	id_50_6869
BKP1_000820	WP_004524876.1 class I SAM-dependent methyltransferase [Burkholderia pseudomallei]_066_096	WP_004524876.1	GenBank	66	96	DYHIAQIRARGAARVLDIGSGWGALLDRLV	SW	0	0	id_50_6869
BKP1_000821	WP_004524876.1 class I SAM-dependent methyltransferase [Burkholderia pseudomallei]_088_118	WP_004524876.1	GenBank	88	118	GALLDRLVTTAGVKQAVGLTLSNEQIRYIG	SW	0	0	id_50_6869
BKP1_000822	WP_004524876.1 class I SAM-dependent methyltransferase [Burkholderia pseudomallei]_110_140	WP_004524876.1	GenBank	110	140	NEQIRYIGEQYPHPNVDVLLRNWQDYEPEE	SW	0	0	id_50_6869
BKP1_000823	WP_004524876.1 class I SAM-dependent methyltransferase [Burkholderia pseudomallei]_132_162	WP_004524876.1	GenBank	132	162	WQDYEPEEPFDGIISLGAFEHFAKIDEDKV	SW	0	0	id_50_6869
BKP1_000824	WP_004524876.1 class I SAM-dependent methyltransferase [Burkholderia pseudomallei]_154_184	WP_004524876.1	GenBank	154	184	AKIDEDKVQAYRHFFRKSHDFLKPGGRLSL	SW	0	1	id_50_6869
BKP1_000825	WP_004524876.1 class I SAM-dependent methyltransferase [Burkholderia pseudomallei]_176_206	WP_004524876.1	GenBank	176	206	KPGGRLSLQTMGYGDVPRERRHSDLFIARE	SW	0	0	id_50_6869
BKP1_000826	WP_004524876.1 class I SAM-dependent methyltransferase [Burkholderia pseudomallei]_198_228	WP_004524876.1	GenBank	198	228	SDLFIAREVFPESDLPYLADIVRASEMLFE	SW	0	1	id_50_6869
BKP1_000827	WP_004524876.1 class I SAM-dependent methyltransferase [Burkholderia pseudomallei]_220_250	WP_004524876.1	GenBank	220	250	RASEMLFEVELVRNDRHDYVKTMRAWFENL	SW	0	0	id_50_6869
BKP1_000828	WP_004524876.1 class I SAM-dependent methyltransferase [Burkholderia pseudomallei]_242_272	WP_004524876.1	GenBank	242	272	MRAWFENLRAHRREALELAPLNVVERYERL	SW	0	0	id_50_6869
BKP1_000829	WP_004524876.1 class I SAM-dependent methyltransferase [Burkholderia pseudomallei]_264_294	WP_004524876.1	GenBank	264	294	VVERYERLYRTMSYSFDLGAFVLYRITFRR	SW	0	0	id_50_6869
BKP1_000830	WP_004524876.1 class I SAM-dependent methyltransferase [Burkholderia pseudomallei]_281_311	WP_004524876.1	GenBank	281	311	LGAFVLYRITFRRIEPNRIDAGTQHRAALA	SW	0	0	id_50_6869
BKP1_000831	WP_085509800.1 class I SAM-dependent methyltransferase [Burkholderia pseudomallei]_0257	WP_085509800.1	GenBank	281	311	LGAFLLYRITFRRIEPNRIDAGARHRAALA	SC	0	0	id_50_6869
BKP1_000832	WP_044354973.1 class I SAM-dependent methyltransferase [Burkholderia pseudomallei]_0172	WP_044354973.1	GenBank	118	148	EQYPHPNVDVLLRNWQDYEPEAPFDGIISL	SC	0	0	id_50_6869
BKP1_000833	WP_038779481.1 class I SAM-dependent methyltransferase [Burkholderia pseudomallei]_0020	WP_038779481.1	GenBank	2	32	VHLESREAAAPGRDAPYGASADAIQYHYDI	SC	0	0	id_50_6869
BKP1_000834	WP_181001137.1 class I SAM-dependent methyltransferase, partial [Burkholderia pseudomallei]_0019	WP_181001137.1	GenBank	3	33	EHDPHPNVDLLLRKWKDHEPEEPSYGIISL	SC	0	0	id_50_6869
BKP1_000835	WP_181001137.1 class I SAM-dependent methyltransferase, partial [Burkholderia pseudomallei]_0089	WP_181001137.1	GenBank	111	141	FGVGLGRSDRHDSVNLLRAWLQNVHPRLLQ	SC	0	0	id_50_6869
BKP1_000836	WP_231174160.1 class I SAM-dependent methyltransferase, partial [Burkholderia pseudomallei]_0019	WP_231174160.1	GenBank	301	331	AGTQHRAALVRLRWSSYLWLRRRTSQSPND	SC	0	0	id_50_6869
BKP1_000837	WP_181001137.1 class I SAM-dependent methyltransferase, partial [Burkholderia pseudomallei]_0066	WP_181001137.1	GenBank	46	76	VQAYRNFFRKVHDFLKPGGRLSLQMMGYGD	SC	0	0	id_50_6869
BKP1_000838	WP_181001137.1 class I SAM-dependent methyltransferase, partial [Burkholderia pseudomallei]_0101	WP_181001137.1	GenBank	77	107	PRERRHSDLFIAREVFPEWDRPYLGYIGRA	SC	0	0	id_50_6869
BKP1_000839	WP_129112174.1 ATP-binding protein [Burkholderia pseudomallei]_000_030	WP_129112174.1	GenBank	0	30	MLRQHFKLWLTSTEVLERILHSAVYNRTDA	SW	0	0	id_50_2058
BKP1_000840	WP_129112174.1 ATP-binding protein [Burkholderia pseudomallei]_022_052	WP_129112174.1	GenBank	22	52	AVYNRTDAELTRIRQLVPKFVHNASLAEAE	SW	0	0	id_50_2058
BKP1_000841	WP_129112174.1 ATP-binding protein [Burkholderia pseudomallei]_044_074	WP_129112174.1	GenBank	44	74	NASLAEAEKILDDRGALIIAGEPGVGKTTL	SW	0	0	id_50_2058
BKP1_000842	WP_129112174.1 ATP-binding protein [Burkholderia pseudomallei]_066_096	WP_129112174.1	GenBank	66	96	PGVGKTTLGRMLLWLHMEQNWKVFVVDDLQ	SW	0	0	id_50_2058
BKP1_000843	WP_129112174.1 ATP-binding protein [Burkholderia pseudomallei]_088_118	WP_129112174.1	GenBank	88	118	VFVVDDLQEAMAVSTAGEKRLIFLDDFLGQ	SW	0	0	id_50_2058
BKP1_000844	WP_129112174.1 ATP-binding protein [Burkholderia pseudomallei]_110_140	WP_129112174.1	GenBank	110	140	FLDDFLGQISLTNELLGTVDQRLPVFLDRL	SW	0	0	id_50_2058
BKP1_000845	WP_129112174.1 ATP-binding protein [Burkholderia pseudomallei]_132_162	WP_129112174.1	GenBank	132	162	LPVFLDRLRNNKDLRFILTTRLYLLNQAQI	SW	0	0	id_50_2058
BKP1_000846	WP_129112174.1 ATP-binding protein [Burkholderia pseudomallei]_154_184	WP_129112174.1	GenBank	154	184	YLLNQAQIQSDKLSSPRVAASEMTLNVGVY	SW	0	0	id_50_2058
BKP1_000847	WP_129112174.1 ATP-binding protein [Burkholderia pseudomallei]_176_206	WP_129112174.1	GenBank	176	206	MTLNVGVYTRTIKAKVVFNHIYFSDLVDEE	SW	0	0	id_50_2058
BKP1_000848	WP_129112174.1 ATP-binding protein [Burkholderia pseudomallei]_198_228	WP_129112174.1	GenBank	198	228	FSDLVDEEKAKLLDDDFFLKMIDHRNFSPR	SW	0	0	id_50_2058
BKP1_000849	WP_129112174.1 ATP-binding protein [Burkholderia pseudomallei]_220_250	WP_129112174.1	GenBank	220	250	DHRNFSPRLIELLTSADYYSVGDESIQATV	SW	0	0	id_50_2058
BKP1_000850	WP_129112174.1 ATP-binding protein [Burkholderia pseudomallei]_242_272	WP_129112174.1	GenBank	242	272	DESIQATVLRVLNNPAELWERPYRAHLSAD	SW	0	0	id_50_2058
BKP1_000851	WP_129112174.1 ATP-binding protein [Burkholderia pseudomallei]_264_294	WP_129112174.1	GenBank	264	294	YRAHLSADARCLMWAIFFAGLYVGMDRCLQ	SW	2	2	id_50_2058
BKP1_000852	WP_129112174.1 ATP-binding protein [Burkholderia pseudomallei]_286_316	WP_129112174.1	GenBank	286	316	VGMDRSLQLFKRITANAGHQIASSEAVSRF	SW	0	1	id_50_2058
BKP1_000853	WP_129112174.1 ATP-binding protein [Burkholderia pseudomallei]_308_338	WP_129112174.1	GenBank	308	338	SSEAVSRFRTGLKELSGSFVTVGDQEISFA	SW	0	0	id_50_2058
BKP1_000854	WP_129112174.1 ATP-binding protein [Burkholderia pseudomallei]_330_360	WP_129112174.1	GenBank	330	360	GDQEISFANPGIRDFLSKVFIDDHLLPIVV	SW	0	0	id_50_2058
BKP1_000855	WP_129112174.1 ATP-binding protein [Burkholderia pseudomallei]_352_382	WP_129112174.1	GenBank	352	382	DHLLPIVVRSVSTIYELRSAWNFFRTNITM	SW	0	0	id_50_2058
BKP1_000856	WP_129112174.1 ATP-binding protein [Burkholderia pseudomallei]_374_404	WP_129112174.1	GenBank	374	404	FFRTNITMCCDQFGDHDLWLAAIDRIQGDK	SW	2	2	id_50_2058
BKP1_000857	WP_129112174.1 ATP-binding protein [Burkholderia pseudomallei]_396_426	WP_129112174.1	GenBank	396	426	IDRIQGDKSTTAIASLRLILEMSEHLPGLH	SW	0	1	id_50_2058
BKP1_000858	WP_129112174.1 ATP-binding protein [Burkholderia pseudomallei]_418_448	WP_129112174.1	GenBank	418	448	SEHLPGLHIKTVLDRAVDDLMSQGIEARDH	SW	0	1	id_50_2058
BKP1_000859	WP_129112174.1 ATP-binding protein [Burkholderia pseudomallei]_440_470	WP_129112174.1	GenBank	440	470	QGIEARDHYESLFSLRQLKRLQDRTDDLLD	SW	0	1	id_50_2058
BKP1_000860	WP_129112174.1 ATP-binding protein [Burkholderia pseudomallei]_462_492	WP_129112174.1	GenBank	462	492	DRTDDLLDPASKTLTNAAANMLANAGDDLT	SW	0	0	id_50_2058
BKP1_000861	WP_129112174.1 ATP-binding protein [Burkholderia pseudomallei]_484_514	WP_129112174.1	GenBank	484	514	ANAGDDLTIDEITNIAGALGPLTEQRVVRS	SW	0	0	id_50_2058
BKP1_000862	WP_129112174.1 ATP-binding protein [Burkholderia pseudomallei]_506_536	WP_129112174.1	GenBank	506	536	TEQRVVRSAASEALQGFIFGIEHKLSDISS	SW	0	0	id_50_2058
BKP1_000863	WP_129112174.1 ATP-binding protein [Burkholderia pseudomallei]_528_558	WP_129112174.1	GenBank	528	558	HKLSDISSSQELDTFRDDLVHAAQKYGVRI	SW	0	0	id_50_2058
BKP1_000864	WP_129112174.1 ATP-binding protein [Burkholderia pseudomallei]_550_580	WP_129112174.1	GenBank	550	580	AQKYGVRIDAALTQDIQNRRETLERREDEE	SW	0	0	id_50_2058
BKP1_000865	WP_129112174.1 ATP-binding protein [Burkholderia pseudomallei]_572_602	WP_129112174.1	GenBank	572	602	LERREDEEDSDPYQQAGPQDAVGEISDAEI	SW	0	0	id_50_2058
BKP1_000866	WP_129112174.1 ATP-binding protein [Burkholderia pseudomallei]_586_616	WP_129112174.1	GenBank	586	616	QAGPQDAVGEISDAEIKSMFSLMATGPASG	SW	0	0	id_50_2058
BKP1_000867	WP_273917322.1 hypothetical protein, partial [Burkholderia pseudomallei]_000_030	WP_273917322.1	GenBank	0	30	MRLLKVCAIRDAPDEIFHNVGQVCGRHVAA	SW	2	2	id_50_16111
BKP1_000868	WP_273917322.1 hypothetical protein, partial [Burkholderia pseudomallei]_022_052	WP_273917322.1	GenBank	22	52	VSGRHVAAMWRRAGGGVGTTGGRRRASDMR	SW	0	1	id_50_16111
BKP1_000869	WP_273917322.1 hypothetical protein, partial [Burkholderia pseudomallei]_044_074	WP_273917322.1	GenBank	44	74	RRRASDMRGRDARDSMRSASEERHAGGGVQ	SW	0	1	id_50_16111
BKP1_000870	WP_273917322.1 hypothetical protein, partial [Burkholderia pseudomallei]_066_096	WP_273917322.1	GenBank	66	96	RHAGGGVQAASAAAPRIKKVHRRKPWSLGE	SW	0	1	id_50_16111
BKP1_000871	WP_273917322.1 hypothetical protein, partial [Burkholderia pseudomallei]_097_127	WP_273917322.1	GenBank	97	127	LRNLTPDFMDVRRRNSSIARHFRHWVAGQA	SW	0	1	id_50_16111
BKP1_000872	WP_234708933.1 hypothetical protein, partial [Burkholderia pseudomallei]_0036	WP_234708933.1	GenBank	13	43	KDAKTERRTNTVSTRDAPPSPHGRDPGKKK	SC	0	0	id_50_16111
BKP1_000873	WP_230968757.1 hypothetical protein, partial [Burkholderia pseudomallei]_0019	WP_230968757.1	GenBank	5	35	DAARAIGAKRSAKRARIASRAARIKKVHRR	SC	0	0	id_50_16111
BKP1_000874	WP_218642611.1 hypothetical protein, partial [Burkholderia pseudomallei]_0003	WP_218642611.1	GenBank	0	30	MPDGLSIGRAVPNATKKKVHRRKPWSLGER	SC	0	0	id_50_16111
BKP1_000875	WP_234708933.1 hypothetical protein, partial [Burkholderia pseudomallei]_0037	WP_234708933.1	GenBank	0	30	MDTERLNGSERAEKDAKTERRTNTVSTRDA	SC	0	0	id_50_16111
BKP1_000876	tr|A0A0E1U752|A0A0E1U752_BURPE Uncharacterized protein OS=Burkholderia pseudomallei 576 OX=557724 GN=BUC_3573 PE=4 SV=1_000_030	A0A0E1U752	Uniprot	0	30	MRIRSGVASPKGGGAAASSAGGGFRGRAQR	SW	0	1	id_50_22392
BKP1_000877	tr|A0A0E1U752|A0A0E1U752_BURPE Uncharacterized protein OS=Burkholderia pseudomallei 576 OX=557724 GN=BUC_3573 PE=4 SV=1_034_064	A0A0E1U752	Uniprot	34	64	RQPGAGRAGGPRKAGGGAAARAAKTVTIAA	SW	0	0	id_50_22392
BKP1_000878	tr|A3ND58|A3ND58_BURP6 Uncharacterized protein OS=Burkholderia pseudomallei (strain 668) OX=320373 GN=BURPS668_3268 PE=4 SV=1_0003	A3ND58	Uniprot	23	53	FRGRAQRGRAQRQPGARRAGGPRKAGGGAA	SC	0	0	id_50_22392
BKP1_000879	WP_038720243.1 DUF2163 domain-containing protein [Burkholderia pseudomallei]_000_030	WP_038720243.1	GenBank	0	30	MRGVSAAMSTWLAGDVRTIATSVQVIRTDA	SW	0	1	id_50_5921
BKP1_000880	WP_038720243.1 DUF2163 domain-containing protein [Burkholderia pseudomallei]_022_052	WP_038720243.1	GenBank	22	52	VQVIRTDATVWGFTDHDVDIAYNGVVYRST	SW	0	0	id_50_5921
BKP1_000881	WP_038720243.1 DUF2163 domain-containing protein [Burkholderia pseudomallei]_044_074	WP_038720243.1	GenBank	44	74	NGVVYRSTYGYTASAVESSADLSTSNLEID	SW	0	0	id_50_5921
BKP1_000882	WP_038720243.1 DUF2163 domain-containing protein [Burkholderia pseudomallei]_066_096	WP_038720243.1	GenBank	66	96	STSNLEIDGLLVTGGGAVTRSGVEAGLWSN	SW	0	0	id_50_5921
BKP1_000883	WP_038720243.1 DUF2163 domain-containing protein [Burkholderia pseudomallei]_088_118	WP_038720243.1	GenBank	88	118	VEAGLWSNAAVLIFVVNYADLSMGQMNLTS	SW	0	0	id_50_5921
BKP1_000884	WP_038720243.1 DUF2163 domain-containing protein [Burkholderia pseudomallei]_110_140	WP_038720243.1	GenBank	110	140	MGQMNLTSGNLGQFTLQNGVWKAELRGLAQ	SW	0	0	id_50_5921
BKP1_000885	WP_038720243.1 DUF2163 domain-containing protein [Burkholderia pseudomallei]_132_162	WP_038720243.1	GenBank	132	162	AELRGLAQTMQQTIGEQFSTTSRATFGDSR	SW	0	1	id_50_5921
BKP1_000886	WP_038720243.1 DUF2163 domain-containing protein [Burkholderia pseudomallei]_154_184	WP_038720243.1	GenBank	154	184	RATFGDSRSQKALGPLTFSGSVSAVTAQYL	SW	0	1	id_50_5921
BKP1_000887	WP_038720243.1 DUF2163 domain-containing protein [Burkholderia pseudomallei]_176_206	WP_038720243.1	GenBank	176	206	SAVTAQYLAWTDPSLTQAGPTVPFVDSMGR	SW	0	0	id_50_5921
BKP1_000888	WP_038720243.1 DUF2163 domain-containing protein [Burkholderia pseudomallei]_198_228	WP_038720243.1	GenBank	198	228	PFVDSMGRRVPTTGPFQIQIVPPSGTFVAN	SW	0	0	id_50_5921
BKP1_000889	WP_038720243.1 DUF2163 domain-containing protein [Burkholderia pseudomallei]_220_250	WP_038720243.1	GenBank	220	250	PSGTFVANSSVADSAGNTWTAVGGSPSSHQ	SW	0	0	id_50_5921
BKP1_000890	WP_038720243.1 DUF2163 domain-containing protein [Burkholderia pseudomallei]_242_272	WP_038720243.1	GenBank	242	272	GGSPSSHQYSVTSGGLYTFNAGDGGAEVFI	SW	0	0	id_50_5921
BKP1_000891	WP_038720243.1 DUF2163 domain-containing protein [Burkholderia pseudomallei]_264_294	WP_038720243.1	GenBank	264	294	DGGAEVFINYTYGVGYFAYGKVTWTSGQNT	SW	0	0	id_50_5921
BKP1_000892	WP_038720243.1 DUF2163 domain-containing protein [Burkholderia pseudomallei]_286_316	WP_038720243.1	GenBank	286	316	TWTSGQNTGYSMEVRNSSPGSVTLAMPMTF	SW	0	0	id_50_5921
BKP1_000893	WP_038720243.1 DUF2163 domain-containing protein [Burkholderia pseudomallei]_308_338	WP_038720243.1	GenBank	308	338	TLAMPMTFAIAPGDAYTIVAGCDKQFGTCR	SW	2	2	id_50_5921
BKP1_000894	WP_038720243.1 DUF2163 domain-containing protein [Burkholderia pseudomallei]_330_360	WP_038720243.1	GenBank	330	360	DKQFGTSRDRWSNILHFRGEPYIPGPDTIL	SW	0	1	id_50_5921
BKP1_000895	WP_038720243.1 DUF2163 domain-containing protein [Burkholderia pseudomallei]_335_365	WP_038720243.1	GenBank	335	365	TSRDRWSNILHFRGEPYIPGPDTILRPLGD	SW	0	1	id_50_5921
BKP1_000896	WP_050865139.1 DUF2163 domain-containing protein [Burkholderia pseudomallei]_0178	WP_050865139.1	GenBank	287	317	TGQNAGFSMEVKTFSPGVVTLAMAMPYPIA	SC	0	0	id_50_5921
BKP1_000897	WP_200524275.1 DUF2163 domain-containing protein [Burkholderia pseudomallei]_0138	WP_200524275.1	GenBank	209	239	PFTIQVVPPTGGAFVSDGGVTNSQGKTLSL	SC	0	0	id_50_5921
BKP1_000898	WP_076880989.1 DUF2163 domain-containing protein [Burkholderia pseudomallei]_0118	WP_076880989.1	GenBank	265	295	WEVFIDYDYTIGYFAYGKVTWLTGQNAGFS	SC	0	0	id_50_5921
BKP1_000899	WP_076880989.1 DUF2163 domain-containing protein [Burkholderia pseudomallei]_0124	WP_076880989.1	GenBank	19	49	ATLWLVTRKDGAQFGFTDLDQPITYGGVTY	SC	0	0	id_50_5921
BKP1_000900	WP_050865139.1 DUF2163 domain-containing protein [Burkholderia pseudomallei]_0048	WP_050865139.1	GenBank	121	151	VSISNGAYKAELRGVAQLMQQEQGDVYSPT	SC	0	0	id_50_5921
BKP1_000901	WP_122809511.1 DUF2163 domain-containing protein [Burkholderia pseudomallei]_0135	WP_122809511.1	GenBank	68	98	SNLEVQAVFDSVNITPESLESGLWDFAQVR	SC	0	0	id_50_5921
BKP1_000902	WP_076880989.1 DUF2163 domain-containing protein [Burkholderia pseudomallei]_0037	WP_076880989.1	GenBank	177	207	VNATTWNDPTLTQVGTVSAYTDTKGEKVPT	SC	0	0	id_50_5921
BKP1_000903	WP_050865139.1 DUF2163 domain-containing protein [Burkholderia pseudomallei]_0330	WP_050865139.1	GenBank	0	30	MRSINAALLAHLAGNTQTVATLWLVTRKDG	SC	0	0	id_50_5921
BKP1_000904	WP_122835216.1 DUF2163 domain-containing protein [Burkholderia pseudomallei]_0186	WP_122835216.1	GenBank	231	261	SQGKTLSLVSSSPGDGQYSVSSTGLYTFSS	SC	0	0	id_50_5921
BKP1_000905	WP_076880989.1 DUF2163 domain-containing protein [Burkholderia pseudomallei]_0051	WP_076880989.1	GenBank	297	327	VKTFSPGVATLAMAMPYPIAVGDTYQIVPG	SC	0	0	id_50_5921
BKP1_000906	WP_014919812.1 DUF2163 domain-containing protein [Burkholderia pseudomallei]_0114	WP_014919812.1	GenBank	161	191	TIDRGPLTVSGSVASLVNATSWNDPTLTQV	SC	0	0	id_50_5921
BKP1_000907	WP_014919812.1 DUF2163 domain-containing protein [Burkholderia pseudomallei]_0167	WP_014919812.1	GenBank	243	273	PGDGQYAVNSTGLYTFSGSDAGWEVFIDYD	SC	0	0	id_50_5921
BKP1_000908	WP_050865669.1 DUF2163 domain-containing protein [Burkholderia pseudomallei]_0250	WP_050865669.1	GenBank	187	217	LTQVGTVSSYKDTKGEKVPTRSPFTIQVVP	SC	0	0	id_50_5921
BKP1_000909	WP_014919812.1 DUF2163 domain-containing protein [Burkholderia pseudomallei]_0061	WP_014919812.1	GenBank	30	60	AQFGFTDLDQPIIYGGVTYEATGGYTHSQI	SC	0	0	id_50_5921
BKP1_000910	WP_200524275.1 DUF2163 domain-containing protein [Burkholderia pseudomallei]_0204	WP_200524275.1	GenBank	263	293	PGWEVFINYDYTIGYFAYGKVVWLTGQNAG	SC	0	0	id_50_5921
BKP1_000911	WP_196509091.1 DUF2163 domain-containing protein [Burkholderia pseudomallei]_0196	WP_196509091.1	GenBank	67	97	TSNLEVQAIFDSSTITQASLESGQWDFAQV	SC	0	0	id_50_5921
BKP1_000912	WP_273944953.1 DUF2163 domain-containing protein [Burkholderia pseudomallei]_0233	WP_273944953.1	GenBank	189	219	QVGTVSAYVDTKGEKVPTHSPYTIQVVPPT	SC	0	0	id_50_5921
BKP1_000913	WP_196509091.1 DUF2163 domain-containing protein [Burkholderia pseudomallei]_0176	WP_196509091.1	GenBank	116	146	GYLGQVTISNGAYSVELRGLAQLSQQEQGD	SC	0	0	id_50_5921
BKP1_000914	WP_038760492.1 DUF2163 domain-containing protein [Burkholderia pseudomallei]_0323	WP_038760492.1	GenBank	180	210	AQYLAWTDPSLTQAGPTVSFVDSMGRRVPT	SC	0	0	id_50_5921
BKP1_000915	WP_038760492.1 DUF2163 domain-containing protein [Burkholderia pseudomallei]_0239	WP_038760492.1	GenBank	23	53	QVTRTDATVWGFTDHDVDIAYSGVVYRSTY	SC	0	0	id_50_5921
BKP1_000916	WP_076934388.1 DUF2163 domain-containing protein [Burkholderia pseudomallei]_0111	WP_076934388.1	GenBank	180	210	TSWNAPTLTQTGPTVAYTDTTGHKVPTQNP	SC	0	0	id_50_5921
BKP1_000917	WP_050865139.1 DUF2163 domain-containing protein [Burkholderia pseudomallei]_0054	WP_050865139.1	GenBank	251	281	NSTGLYTFSSADAAWEVFMNYDYTIGYFAY	SC	0	0	id_50_5921
BKP1_000918	WP_196509091.1 DUF2163 domain-containing protein [Burkholderia pseudomallei]_0264	WP_196509091.1	GenBank	20	50	TLWLITRKDGQQFAFTDLDQPVTYNGITYQ	SC	0	0	id_50_5921
BKP1_000919	WP_050865669.1 DUF2163 domain-containing protein [Burkholderia pseudomallei]_0231	WP_050865669.1	GenBank	103	133	YADLTQGSVILSSGTLGQVSITNGAYKAEL	SC	0	0	id_50_5921
BKP1_000920	WP_076934388.1 DUF2163 domain-containing protein [Burkholderia pseudomallei]_0076	WP_076934388.1	GenBank	41	71	ITYKGITYQAAGGYTHSQIETSSDLSTSNL	SC	0	0	id_50_5921
BKP1_000921	WP_196509091.1 DUF2163 domain-containing protein [Burkholderia pseudomallei]_0142	WP_196509091.1	GenBank	99	129	SLVNWADLTQGAVVLETGYLGQVTISNGAY	SC	0	0	id_50_5921
BKP1_000922	WP_122809511.1 DUF2163 domain-containing protein [Burkholderia pseudomallei]_0001	WP_122809511.1	GenBank	230	260	NSQGKTLSVVSSGPGDGQYAVSSGGLYTFS	SC	0	0	id_50_5921
BKP1_000923	WP_196509091.1 DUF2163 domain-containing protein [Burkholderia pseudomallei]_0270	WP_196509091.1	GenBank	277	307	YFAYGKVIWLTGQNAGFSMEVKSFAPGVVT	SC	0	0	id_50_5921
BKP1_000924	WP_050865139.1 DUF2163 domain-containing protein [Burkholderia pseudomallei]_0213	WP_050865139.1	GenBank	30	60	TQFGFTDLDQPITYGGVTYEAQGGYTHSQI	SC	0	0	id_50_5921
BKP1_000925	WP_136517194.1 DUF2163 domain-containing protein [Burkholderia pseudomallei]_0313	WP_136517194.1	GenBank	0	30	MRSINSALLAHLAANTQTLATLWLVTRKDG	SC	0	0	id_50_5921
BKP1_000926	WP_200524275.1 DUF2163 domain-containing protein [Burkholderia pseudomallei]_0097	WP_200524275.1	GenBank	2	32	SISAPMLAHLAGNTLTVATLWLITRKDGAQ	SC	0	0	id_50_5921
BKP1_000927	WP_273944953.1 DUF2163 domain-containing protein [Burkholderia pseudomallei]_0189	WP_273944953.1	GenBank	58	88	QIDMTSDLSTSNLEVQAVFDSANITPESLE	SC	0	0	id_50_5921
BKP1_000928	WP_085508507.1 DUF2163 domain-containing protein [Burkholderia pseudomallei]_0095	WP_085508507.1	GenBank	119	149	GQVSISNGAYKAEMRGLAQLLQQEQGDVYS	SC	0	0	id_50_5921
BKP1_000929	WP_196509091.1 DUF2163 domain-containing protein [Burkholderia pseudomallei]_0245	WP_196509091.1	GenBank	255	285	LYTFSSADPAWEVFVNYTYSIGYFAYGKVI	SC	0	0	id_50_5921
BKP1_000930	WP_076934388.1 DUF2163 domain-containing protein [Burkholderia pseudomallei]_0225	WP_076934388.1	GenBank	214	244	VVPPTGGQFANNISVVDSLGNVLTQDASNP	SC	0	0	id_50_5921
BKP1_000931	WP_196509091.1 DUF2163 domain-containing protein [Burkholderia pseudomallei]_0048	WP_196509091.1	GenBank	217	247	PTGGAFVADAGVKASYGQSLTQVASNPGDG	SC	0	0	id_50_5921
BKP1_000932	WP_200524275.1 DUF2163 domain-containing protein [Burkholderia pseudomallei]_0309	WP_200524275.1	GenBank	291	321	AGFSMEVKMFSPGVVTLAMAMPYPIAIGDT	SC	0	0	id_50_5921
BKP1_000933	WP_076934388.1 DUF2163 domain-containing protein [Burkholderia pseudomallei]_0206	WP_076934388.1	GenBank	239	269	DASNPAQSHYSVDGTGTYTFNNNNAGGEVF	SC	0	0	id_50_5921
BKP1_000934	WP_196509091.1 DUF2163 domain-containing protein [Burkholderia pseudomallei]_0195	WP_196509091.1	GenBank	161	191	TINTVPLTFNGTVSSVNGATSWNDPTLTQT	SC	0	0	id_50_5921
BKP1_000935	WP_273944953.1 DUF2163 domain-containing protein [Burkholderia pseudomallei]_0064	WP_273944953.1	GenBank	234	264	KTLSVVSSSPGDGQYDVNSTGLYAFSGSDA	SC	0	0	id_50_5921
BKP1_000936	WP_085508507.1 DUF2163 domain-containing protein [Burkholderia pseudomallei]_0259	WP_085508507.1	GenBank	23	53	LVTRTDGAQFGFTDLDRPIVYGGVTYEAAG	SC	0	0	id_50_5921
BKP1_000937	WP_264237723.1 DUF2163 domain-containing protein, partial [Burkholderia pseudomallei]_0041	WP_264237723.1	GenBank	73	103	NYADLSMGQMNLTSGNLGQFTMQNGVWKAE	SC	0	0	id_50_5921
BKP1_000938	WP_200524275.1 DUF2163 domain-containing protein [Burkholderia pseudomallei]_0036	WP_200524275.1	GenBank	181	211	SWNDPTLTQVGTVAAYKDTKGQKVPTRSPF	SC	0	0	id_50_5921
BKP1_000939	WP_076934388.1 DUF2163 domain-containing protein [Burkholderia pseudomallei]_0305	WP_076934388.1	GenBank	161	191	TINTAPLTFNGTVSSLNGATSWNAPTLTQT	SC	0	0	id_50_5921
BKP1_000940	WP_196509091.1 DUF2163 domain-containing protein [Burkholderia pseudomallei]_0076	WP_196509091.1	GenBank	297	327	VKSFAPGVVTLAMAMPYPIAAGDTYTITAG	SC	0	0	id_50_5921
BKP1_000941	WP_050865139.1 DUF2163 domain-containing protein [Burkholderia pseudomallei]_0251	WP_050865139.1	GenBank	217	247	PTGGAFVSDNGVTNSQGKTLSVVSGSPGDG	SC	0	0	id_50_5921
BKP1_000942	WP_200524275.1 DUF2163 domain-containing protein [Burkholderia pseudomallei]_0249	WP_200524275.1	GenBank	161	191	TINRTPLTVSGSVASLNSATSWNDPTLTQV	SC	0	0	id_50_5921
BKP1_000943	WP_200524275.1 DUF2163 domain-containing protein [Burkholderia pseudomallei]_0023	WP_200524275.1	GenBank	121	151	VSISNGAYKAELRGLAQQLQQEQGAVYSPT	SC	0	0	id_50_5921
BKP1_000944	WP_200524275.1 DUF2163 domain-containing protein [Burkholderia pseudomallei]_0301	WP_200524275.1	GenBank	237	267	SLVSSNPGDGQYAVSSTGLYTFSSADPGWE	SC	0	0	id_50_5921
BKP1_000945	WP_085508507.1 DUF2163 domain-containing protein [Burkholderia pseudomallei]_0185	WP_085508507.1	GenBank	242	272	SPGDGQYAASSTGLYTFSGADAGWEVFINY	SC	0	0	id_50_5921
BKP1_000946	WP_196509091.1 DUF2163 domain-containing protein [Burkholderia pseudomallei]_0084	WP_196509091.1	GenBank	195	225	AYTDTTGHKVPTQAPYQIQVVPPTGGAFVA	SC	0	0	id_50_5921
BKP1_000947	WP_136517194.1 DUF2163 domain-containing protein [Burkholderia pseudomallei]_0007	WP_136517194.1	GenBank	162	192	VDRGPLTVSGSVVSLVNATTWNDPTLTQVG	SC	0	0	id_50_5921
BKP1_000948	WP_200524275.1 DUF2163 domain-containing protein [Burkholderia pseudomallei]_0001	WP_200524275.1	GenBank	39	69	QPITYGGITYEATGGYTHSQIDMTSDMSTS	SC	0	0	id_50_5921
BKP1_000949	WP_004527271.1 hypothetical protein [Burkholderia pseudomallei]_000_030	WP_004527271.1	GenBank	0	30	MNDSLDDAALLAAELLARRWLSRQHPRVRR	SW	0	0	id_50_10572
BKP1_000950	WP_004527271.1 hypothetical protein [Burkholderia pseudomallei]_022_052	WP_004527271.1	GenBank	22	52	RQHPRVRRALIDADVWQSVQERLGQVGLYL	SW	0	0	id_50_10572
BKP1_000951	WP_004527271.1 hypothetical protein [Burkholderia pseudomallei]_044_074	WP_004527271.1	GenBank	44	74	LGQVGLYLIDNIHADHVSVALLRGAETSVF	SW	0	0	id_50_10572
BKP1_000952	WP_004527271.1 hypothetical protein [Burkholderia pseudomallei]_066_096	WP_004527271.1	GenBank	66	96	RGAETSVFGESGLDANNNVDLPRDAVSLLV	SW	0	0	id_50_10572
BKP1_000953	WP_004527271.1 hypothetical protein [Burkholderia pseudomallei]_088_118	WP_004527271.1	GenBank	88	118	RDAVSLLVVLWSLIVLPKRERQAARAASAD	SW	0	0	id_50_10572
BKP1_000954	WP_004527271.1 hypothetical protein [Burkholderia pseudomallei]_110_140	WP_004527271.1	GenBank	110	140	AARAASADGETQAEMFAGDRPMPSAVSVSP	SW	0	0	id_50_10572
BKP1_000955	WP_004527271.1 hypothetical protein [Burkholderia pseudomallei]_132_162	WP_004527271.1	GenBank	132	162	PSAVSVSPLVSYKALLADFGTQLGKKTRMD	SW	0	0	id_50_10572
BKP1_000956	WP_004527271.1 hypothetical protein [Burkholderia pseudomallei]_154_184	WP_004527271.1	GenBank	154	184	LGKKTRMDVNLKRLETHGFITRRGDDIAEG	SW	0	0	id_50_10572
BKP1_000957	WP_004527271.1 hypothetical protein [Burkholderia pseudomallei]_176_206	WP_004527271.1	GenBank	176	206	RGDDIAEGPLLDLLLDYNALAPRILDGALS	SW	0	0	id_50_10572
BKP1_000958	WP_004527271.1 hypothetical protein [Burkholderia pseudomallei]_197_227	WP_004527271.1	GenBank	197	227	PRILDGALSDVLARTRSESATESDSPEVQG	SW	0	0	id_50_10572
BKP1_000959	tr|A0A069B0U7|A0A069B0U7_BURPE Multidrug ABC transporter permease OS=Burkholderia pseudomallei OX=28450 GN=CXQ84_11645 PE=3 SV=1_000_030	A0A069B0U7	Uniprot	0	30	MKAMMKPRARRRGARAARRPNGPRAWPLAV	SW	0	0	id_50_3047
BKP1_000960	tr|A0A069B0U7|A0A069B0U7_BURPE Multidrug ABC transporter permease OS=Burkholderia pseudomallei OX=28450 GN=CXQ84_11645 PE=3 SV=1_022_052	A0A069B0U7	Uniprot	22	52	PRAWPLAVAAALVAGSTLAPRYERPAAPVP	SW	0	0	id_50_3047
BKP1_000961	tr|A0A069B0U7|A0A069B0U7_BURPE Multidrug ABC transporter permease OS=Burkholderia pseudomallei OX=28450 GN=CXQ84_11645 PE=3 SV=1_044_074	A0A069B0U7	Uniprot	44	74	ERPAAPVPAHYWSTATGAPREAGPAAAGGP	SW	0	0	id_50_3047
BKP1_000962	tr|A0A069B0U7|A0A069B0U7_BURPE Multidrug ABC transporter permease OS=Burkholderia pseudomallei OX=28450 GN=CXQ84_11645 PE=3 SV=1_066_096	A0A069B0U7	Uniprot	66	96	GPAAAGGPRAMPDARRGDAGRDARDARLDD	SW	0	0	id_50_3047
BKP1_000963	tr|A0A069B0U7|A0A069B0U7_BURPE Multidrug ABC transporter permease OS=Burkholderia pseudomallei OX=28450 GN=CXQ84_11645 PE=3 SV=1_088_118	A0A069B0U7	Uniprot	88	118	ARDARLDDWRAYFTDPALRALIDAALANNR	SW	0	0	id_50_3047
BKP1_000964	tr|A0A069B0U7|A0A069B0U7_BURPE Multidrug ABC transporter permease OS=Burkholderia pseudomallei OX=28450 GN=CXQ84_11645 PE=3 SV=1_110_140	A0A069B0U7	Uniprot	110	140	DAALANNRDLRIATLRIQEARGLYGVARAD	SW	0	0	id_50_3047
BKP1_000965	tr|A0A069B0U7|A0A069B0U7_BURPE Multidrug ABC transporter permease OS=Burkholderia pseudomallei OX=28450 GN=CXQ84_11645 PE=3 SV=1_132_162	A0A069B0U7	Uniprot	132	162	LYGVARADRLPSIDGSLGYERTRLYDPVLR	SW	0	0	id_50_3047
BKP1_000966	tr|A0A069B0U7|A0A069B0U7_BURPE Multidrug ABC transporter permease OS=Burkholderia pseudomallei OX=28450 GN=CXQ84_11645 PE=3 SV=1_154_184	A0A069B0U7	Uniprot	154	184	RLYDPVLRESATSSLYRASVGVSAFEIDLF	SW	0	0	id_50_3047
BKP1_000967	tr|A0A069B0U7|A0A069B0U7_BURPE Multidrug ABC transporter permease OS=Burkholderia pseudomallei OX=28450 GN=CXQ84_11645 PE=3 SV=1_176_206	A0A069B0U7	Uniprot	176	206	SAFEIDLFGRVKSLSDAALAEYFATAEAQR	SW	0	0	id_50_3047
BKP1_000968	tr|A0A069B0U7|A0A069B0U7_BURPE Multidrug ABC transporter permease OS=Burkholderia pseudomallei OX=28450 GN=CXQ84_11645 PE=3 SV=1_198_228	A0A069B0U7	Uniprot	198	228	FATAEAQRAARISLIAEVASAYVTERALVD	SW	0	0	id_50_3047
BKP1_000969	tr|A0A069B0U7|A0A069B0U7_BURPE Multidrug ABC transporter permease OS=Burkholderia pseudomallei OX=28450 GN=CXQ84_11645 PE=3 SV=1_220_250	A0A069B0U7	Uniprot	220	250	VTERALVDQLGLAERTLAARDAAYALTQRR	SW	0	0	id_50_3047
BKP1_000970	tr|A0A069B0U7|A0A069B0U7_BURPE Multidrug ABC transporter permease OS=Burkholderia pseudomallei OX=28450 GN=CXQ84_11645 PE=3 SV=1_242_272	A0A069B0U7	Uniprot	242	272	AYALTQRRYAAGTSTAIELRTAEMLVASAR	SW	0	0	id_50_3047
BKP1_000971	tr|A0A069B0U7|A0A069B0U7_BURPE Multidrug ABC transporter permease OS=Burkholderia pseudomallei OX=28450 GN=CXQ84_11645 PE=3 SV=1_264_294	A0A069B0U7	Uniprot	264	294	EMLVASARASKAALEREHTQAASALKLLAG	SW	0	0	id_50_3047
BKP1_000972	tr|A0A069B0U7|A0A069B0U7_BURPE Multidrug ABC transporter permease OS=Burkholderia pseudomallei OX=28450 GN=CXQ84_11645 PE=3 SV=1_286_316	A0A069B0U7	Uniprot	286	316	SALKLLAGDFMTALPADAPALDALAVARVS	SW	0	0	id_50_3047
BKP1_000973	tr|A0A069B0U7|A0A069B0U7_BURPE Multidrug ABC transporter permease OS=Burkholderia pseudomallei OX=28450 GN=CXQ84_11645 PE=3 SV=1_308_338	A0A069B0U7	Uniprot	308	338	ALAVARVSPGLSSDLLEQRPDIRQAEQRLV	SW	0	0	id_50_3047
BKP1_000974	tr|A0A069B0U7|A0A069B0U7_BURPE Multidrug ABC transporter permease OS=Burkholderia pseudomallei OX=28450 GN=CXQ84_11645 PE=3 SV=1_330_360	A0A069B0U7	Uniprot	330	360	RQAEQRLVAANANIGAARAAFFPRIALTTD	SW	0	0	id_50_3047
BKP1_000975	tr|A0A069B0U7|A0A069B0U7_BURPE Multidrug ABC transporter permease OS=Burkholderia pseudomallei OX=28450 GN=CXQ84_11645 PE=3 SV=1_352_382	A0A069B0U7	Uniprot	352	382	PRIALTTDVGSVSDAFSGLFSAGSSVWTFA	SW	0	0	id_50_3047
BKP1_000976	tr|A0A069B0U7|A0A069B0U7_BURPE Multidrug ABC transporter permease OS=Burkholderia pseudomallei OX=28450 GN=CXQ84_11645 PE=3 SV=1_374_404	A0A069B0U7	Uniprot	374	404	GSSVWTFAPRLTLPIFAGGRNRANLDVADA	SW	0	0	id_50_3047
BKP1_000977	tr|A0A069B0U7|A0A069B0U7_BURPE Multidrug ABC transporter permease OS=Burkholderia pseudomallei OX=28450 GN=CXQ84_11645 PE=3 SV=1_396_426	A0A069B0U7	Uniprot	396	426	ANLDVADARKHIAVAEYEKTIQTAFREVAD	SW	0	0	id_50_3047
BKP1_000978	tr|A0A069B0U7|A0A069B0U7_BURPE Multidrug ABC transporter permease OS=Burkholderia pseudomallei OX=28450 GN=CXQ84_11645 PE=3 SV=1_418_448	A0A069B0U7	Uniprot	418	448	TAFREVADALAARDQIDAQLAAQQAVYGAD	SW	0	0	id_50_3047
BKP1_000979	tr|A0A069B0U7|A0A069B0U7_BURPE Multidrug ABC transporter permease OS=Burkholderia pseudomallei OX=28450 GN=CXQ84_11645 PE=3 SV=1_440_470	A0A069B0U7	Uniprot	440	470	QQAVYGADAERLRLAQRRYDSGVASYLELL	SW	0	0	id_50_3047
BKP1_000980	tr|A0A069B0U7|A0A069B0U7_BURPE Multidrug ABC transporter permease OS=Burkholderia pseudomallei OX=28450 GN=CXQ84_11645 PE=3 SV=1_462_492	A0A069B0U7	Uniprot	462	492	VASYLELLDAQRSTFESGQELIRLKQLRLT	SW	0	0	id_50_3047
BKP1_000981	tr|A0A069B0U7|A0A069B0U7_BURPE Multidrug ABC transporter permease OS=Burkholderia pseudomallei OX=28450 GN=CXQ84_11645 PE=3 SV=1_486_516	A0A069B0U7	Uniprot	486	516	KQLRLTNAITLYRALGGGWSRAGCGGDGCA	SW	2	2	id_50_3047
BKP1_000982	WP_004193508.1 MULTISPECIES: glycine zipper 2TM domain-containing protein [Burkholderia]_000_030	WP_004193508.1	GenBank	0	30	MDNQNTTTQQRQRLHPLVATAAGAVIVASL	SW	0	0	id_50_9792
BKP1_000983	WP_004193508.1 MULTISPECIES: glycine zipper 2TM domain-containing protein [Burkholderia]_022_052	WP_004193508.1	GenBank	22	52	GAVIVASLAATAAITGVFPKASSTNAQNAQ	SW	0	0	id_50_9792
BKP1_000984	WP_004193508.1 MULTISPECIES: glycine zipper 2TM domain-containing protein [Burkholderia]_044_074	WP_004193508.1	GenBank	44	74	STNAQNAQTQAALIASQPAVDTAAAASAAL	SW	0	0	id_50_9792
BKP1_000985	WP_004193508.1 MULTISPECIES: glycine zipper 2TM domain-containing protein [Burkholderia]_088_118	WP_004193508.1	GenBank	88	118	TVAQAAPKPTSHQTTRHHHKTSAAPQPPQY	SW	0	0	id_50_9792
BKP1_000986	WP_004193508.1 MULTISPECIES: glycine zipper 2TM domain-containing protein [Burkholderia]_110_140	WP_004193508.1	GenBank	110	140	AAPQPPQYAQQPYPQQQQSTYCASCGTVAS	SW	2	2	id_50_9792
BKP1_000987	WP_004193508.1 MULTISPECIES: glycine zipper 2TM domain-containing protein [Burkholderia]_132_162	WP_004193508.1	GenBank	132	162	ASSGTVASIVPVRTAGTSSGLGAIGGAAAG	SW	0	1	id_50_9792
BKP1_000988	WP_004193508.1 MULTISPECIES: glycine zipper 2TM domain-containing protein [Burkholderia]_154_184	WP_004193508.1	GenBank	154	184	AIGGAAAGGLVGNQFGRGNGRTAMTIIGAL	SW	0	0	id_50_9792
BKP1_000989	WP_004193508.1 MULTISPECIES: glycine zipper 2TM domain-containing protein [Burkholderia]_176_206	WP_004193508.1	GenBank	176	206	AMTIIGALGGGLAGNAVEKQVRSETDYQVQ	SW	0	0	id_50_9792
BKP1_000990	WP_004193508.1 MULTISPECIES: glycine zipper 2TM domain-containing protein [Burkholderia]_198_228	WP_004193508.1	GenBank	198	228	SETDYQVQVQMQDGSTRTFTYHNPPPFGQG	SW	0	0	id_50_9792
BKP1_000991	WP_004193508.1 MULTISPECIES: glycine zipper 2TM domain-containing protein [Burkholderia]_211_241	WP_004193508.1	GenBank	211	241	GSTRTFTYHNPPPFGQGQRVRVENGTLVGA	SW	0	0	id_50_9792
BKP1_000992	WP_038761624.1 glycine zipper 2TM domain-containing protein [Burkholderia pseudomallei]_0023	WP_038761624.1	GenBank	97	127	TSHQTTRHHHKTSAALQPPQYAQQPYPQQQ	SC	0	0	id_50_9792
BKP1_000993	tr|A3NPB6|A3NPB6_BURP6 Uncharacterized protein OS=Burkholderia pseudomallei (strain 668) OX=320373 GN=BURPS668_A3196 PE=4 SV=1_000_030	A3NPB6	Uniprot	0	30	MARAERRERRKPVDSGSERYRALGLSSSRD	SW	0	1	id_50_23417
BKP1_000994	tr|A3NPB6|A3NPB6_BURP6 Uncharacterized protein OS=Burkholderia pseudomallei (strain 668) OX=320373 GN=BURPS668_A3196 PE=4 SV=1_026_056	A3NPB6	Uniprot	26	56	SCRDRTGRRPVASTAGERAACHAAGVPADR	SW	2	2	id_50_23417
BKP1_000995	WP_004526931.1 MULTISPECIES: capistruin family lasso peptide [Burkholderia]_000_030	WP_004526931.1	GenBank	0	30	MVRFLAKLLRSTIHGSHGVSLDAVSSTHGT	SW	0	0	id_50_24184
BKP1_000996	WP_004526931.1 MULTISPECIES: capistruin family lasso peptide [Burkholderia]_017_047	WP_004526931.1	GenBank	17	47	GVSLDAVSSTHGTPGFQTPDARVISRFGFN	SW	0	0	id_50_24184
BKP1_000997	WP_102619228.1 P1 family peptidase [Burkholderia pseudomallei]_000_030	WP_102619228.1	GenBank	0	30	MRARTSGRADAAEALDAADAAPHVGALPAG	SW	0	0	id_50_3632
BKP1_000998	WP_102619228.1 P1 family peptidase [Burkholderia pseudomallei]_022_052	WP_102619228.1	GenBank	22	52	HVGALPAGPLRSIADVAGVTVGHATLDARG	SW	0	0	id_50_3632
BKP1_000999	WP_102619228.1 P1 family peptidase [Burkholderia pseudomallei]_044_074	WP_102619228.1	GenBank	44	74	HATLDARGVQTGVSVVRPHAGDVYRDKVPA	SW	0	0	id_50_3632
BKP1_001000	WP_102619228.1 P1 family peptidase [Burkholderia pseudomallei]_066_096	WP_102619228.1	GenBank	66	96	VYRDKVPAAAAVINGFGKSIGLVQVDELGV	SW	0	0	id_50_3632
BKP1_001001	WP_102619228.1 P1 family peptidase [Burkholderia pseudomallei]_088_118	WP_102619228.1	GenBank	88	118	VQVDELGVLETPLALTNTFGVGALAQAQIR	SW	0	0	id_50_3632
BKP1_001002	WP_102619228.1 P1 family peptidase [Burkholderia pseudomallei]_110_140	WP_102619228.1	GenBank	110	140	ALAQAQIRAAIDANPQIGRAWPSVNPLVFE	SW	0	0	id_50_3632
BKP1_001003	WP_102619228.1 P1 family peptidase [Burkholderia pseudomallei]_132_162	WP_102619228.1	GenBank	132	162	SVNPLVFESNDGYLNDLHAFAVTPAHYAQA	SW	0	1	id_50_3632
BKP1_001004	WP_102619228.1 P1 family peptidase [Burkholderia pseudomallei]_154_184	WP_102619228.1	GenBank	154	184	TPAHYAQALADARRAFARGAVGAGRGMSSF	SW	0	1	id_50_3632
BKP1_001005	WP_102619228.1 P1 family peptidase [Burkholderia pseudomallei]_176_206	WP_102619228.1	GenBank	176	206	AGRGMSSFDLKGGIGSASRVVRAAGEAWTV	SW	0	1	id_50_3632
BKP1_001006	WP_102619228.1 P1 family peptidase [Burkholderia pseudomallei]_198_228	WP_102619228.1	GenBank	198	228	AAGEAWTVGALVLANFGRLPMLTIAGVPVG	SW	0	0	id_50_3632
BKP1_001007	WP_102619228.1 P1 family peptidase [Burkholderia pseudomallei]_220_250	WP_102619228.1	GenBank	220	250	TIAGVPVGRMIAERDAGGAPGAGGGQGADG	SW	0	0	id_50_3632
BKP1_001008	WP_102619228.1 P1 family peptidase [Burkholderia pseudomallei]_242_272	WP_102619228.1	GenBank	242	272	GGGQGADGARDDVAAAGARGERGERGEEGE	SW	0	0	id_50_3632
BKP1_001009	WP_102619228.1 P1 family peptidase [Burkholderia pseudomallei]_264_294	WP_102619228.1	GenBank	264	294	GERGEEGERGERGERGERGDGPHGTYGTYG	SW	0	0	id_50_3632
BKP1_001010	WP_102619228.1 P1 family peptidase [Burkholderia pseudomallei]_286_316	WP_102619228.1	GenBank	286	316	HGTYGTYGTYGAHGTHGAHGAHGRENAGTG	SW	0	0	id_50_3632
BKP1_001011	WP_102619228.1 P1 family peptidase [Burkholderia pseudomallei]_308_338	WP_102619228.1	GenBank	308	338	GRENAGTGGGAAGGLAPRRARDAGASSPGA	SW	0	0	id_50_3632
BKP1_001012	WP_102619228.1 P1 family peptidase [Burkholderia pseudomallei]_330_360	WP_102619228.1	GenBank	330	360	AGASSPGAAPDAAPPEQGSIIMLVATDAPL	SW	0	0	id_50_3632
BKP1_001013	WP_102619228.1 P1 family peptidase [Burkholderia pseudomallei]_352_382	WP_102619228.1	GenBank	352	382	LVATDAPLSSRQLKRVALRAAAGLARTGSV	SW	0	0	id_50_3632
BKP1_001014	WP_102619228.1 P1 family peptidase [Burkholderia pseudomallei]_374_404	WP_102619228.1	GenBank	374	404	GLARTGSVYGHGSGDIALAFSTAYTVPHDA	SW	0	0	id_50_3632
BKP1_001015	WP_102619228.1 P1 family peptidase [Burkholderia pseudomallei]_396_426	WP_102619228.1	GenBank	396	426	AYTVPHDAERVSLPALVADAALDPLFAAAA	SW	0	0	id_50_3632
BKP1_001016	WP_102619228.1 P1 family peptidase [Burkholderia pseudomallei]_418_448	WP_102619228.1	GenBank	418	448	DPLFAAAADSVEQAIVDALWRATRVTGRDG	SW	0	0	id_50_3632
BKP1_001017	WP_102619228.1 P1 family peptidase [Burkholderia pseudomallei]_442_472	WP_102619228.1	GenBank	442	472	VTGRDGHTRRALRDAAPELERWLRAARAGA	SW	0	0	id_50_3632
BKP1_001018	tr|Q3JTB3|Q3JTB3_BURP1 Spore coat protein U domain-containing protein OS=Burkholderia pseudomallei (strain 1710b) OX=320372 GN=BURPS1710b_1789 PE=4 SV=1_000_030	Q3JTB3	Uniprot	0	30	MRSRSPMLVRSKRDALRRASVRASGARGDG	SW	0	1	id_50_10307
BKP1_001019	tr|Q3JTB3|Q3JTB3_BURP1 Spore coat protein U domain-containing protein OS=Burkholderia pseudomallei (strain 1710b) OX=320372 GN=BURPS1710b_1789 PE=4 SV=1_022_052	Q3JTB3	Uniprot	22	52	ASGARGDGGRARRLDHRKTTTRSTGDRVES	SW	0	0	id_50_10307
BKP1_001020	tr|Q3JTB3|Q3JTB3_BURP1 Spore coat protein U domain-containing protein OS=Burkholderia pseudomallei (strain 1710b) OX=320372 GN=BURPS1710b_1789 PE=4 SV=1_044_074	Q3JTB3	Uniprot	44	74	STGDRVESAMHKREVQVVSGAAFMLFFAAA	SW	0	0	id_50_10307
BKP1_001021	tr|Q3JTB3|Q3JTB3_BURP1 Spore coat protein U domain-containing protein OS=Burkholderia pseudomallei (strain 1710b) OX=320372 GN=BURPS1710b_1789 PE=4 SV=1_066_096	Q3JTB3	Uniprot	66	96	FMLFFAAASAGQLTGTMQVNLQVSRGSEVA	SW	0	1	id_50_10307
BKP1_001022	tr|Q3JTB3|Q3JTB3_BURP1 Spore coat protein U domain-containing protein OS=Burkholderia pseudomallei (strain 1710b) OX=320372 GN=BURPS1710b_1789 PE=4 SV=1_088_118	Q3JTB3	Uniprot	88	118	VSRGSEVAGVAASGDLGRLDFGAQGPLWSD	SW	0	1	id_50_10307
BKP1_001023	tr|Q3JTB3|Q3JTB3_BURP1 Spore coat protein U domain-containing protein OS=Burkholderia pseudomallei (strain 1710b) OX=320372 GN=BURPS1710b_1789 PE=4 SV=1_110_140	Q3JTB3	Uniprot	110	140	AQGPLWSDYLTADGRATSSGAVRVVSSPDV	SW	0	1	id_50_10307
BKP1_001024	tr|Q3JTB3|Q3JTB3_BURP1 Spore coat protein U domain-containing protein OS=Burkholderia pseudomallei (strain 1710b) OX=320372 GN=BURPS1710b_1789 PE=4 SV=1_132_162	Q3JTB3	Uniprot	132	162	RVVSSPDVNGFLVSIDGGRNGDQSTRYLVK	SW	0	1	id_50_10307
BKP1_001025	tr|Q3JTB3|Q3JTB3_BURP1 Spore coat protein U domain-containing protein OS=Burkholderia pseudomallei (strain 1710b) OX=320372 GN=BURPS1710b_1789 PE=4 SV=1_154_184	Q3JTB3	Uniprot	154	184	QSTRYLVKRGANGRVAGRIPYNVYRDAARS	SW	0	0	id_50_10307
BKP1_001026	tr|Q3JTB3|Q3JTB3_BURP1 Spore coat protein U domain-containing protein OS=Burkholderia pseudomallei (strain 1710b) OX=320372 GN=BURPS1710b_1789 PE=4 SV=1_176_206	Q3JTB3	Uniprot	176	206	VYRDAARSVPYVPLMPQSFLVDGGRDDVTL	SW	0	0	id_50_10307
BKP1_001027	tr|Q3JTB3|Q3JTB3_BURP1 Spore coat protein U domain-containing protein OS=Burkholderia pseudomallei (strain 1710b) OX=320372 GN=BURPS1710b_1789 PE=4 SV=1_198_228	Q3JTB3	Uniprot	198	228	GGRDDVTLPVYGVVNGMTRAVPSGTYEDLL	SW	0	0	id_50_10307
BKP1_001028	tr|Q3JTB3|Q3JTB3_BURP1 Spore coat protein U domain-containing protein OS=Burkholderia pseudomallei (strain 1710b) OX=320372 GN=BURPS1710b_1789 PE=4 SV=1_204_234	Q3JTB3	Uniprot	204	234	TLPVYGVVNGMTRAVPSGTYEDLLGITLDW	SW	0	0	id_50_10307
BKP1_001029	tr|A0A0E1TTN7|A0A0E1TTN7_BURPE Putative type I pilus protein OS=Burkholderia pseudomallei 576 OX=557724 GN=BUC_2523 PE=4 SV=1_0035	A0A0E1TTN7	Uniprot	56	86	REVQVVSGAAFMLFFATVSAGQLTGTMQVN	SC	0	0	id_50_10307
BKP1_001030	WP_004542516.1 spore coat U domain-containing protein [Burkholderia pseudomallei]_0072	WP_004542516.1	GenBank	117	147	GRIPYNVYRDAARSVPYVPLMAQSFLVDGG	SC	0	0	id_50_10307
BKP1_001031	WP_181003169.1 MULTISPECIES: hypothetical protein [Burkholderia]_000_030	WP_181003169.1	GenBank	0	30	MAAMRTFAMKLDAVRRASAALGGAAVLAAA	SW	0	0	id_50_8017
BKP1_001032	WP_181003169.1 MULTISPECIES: hypothetical protein [Burkholderia]_044_074	WP_181003169.1	GenBank	44	74	PLAPLAPLAPDGGRAPDLDAVLLHESMTVS	SW	0	0	id_50_8017
BKP1_001033	WP_181003169.1 MULTISPECIES: hypothetical protein [Burkholderia]_066_096	WP_181003169.1	GenBank	66	96	LHESMTVSADGVTRTVTYRERMVRRDGHVW	SW	0	0	id_50_8017
BKP1_001034	WP_181003169.1 MULTISPECIES: hypothetical protein [Burkholderia]_088_118	WP_181003169.1	GenBank	88	118	VRRDGHVWIERVPPSGAKRAHAGGAHAHEG	SW	0	0	id_50_8017
BKP1_001035	WP_181003169.1 MULTISPECIES: hypothetical protein [Burkholderia]_110_140	WP_181003169.1	GenBank	110	140	GGAHAHEGLDAARTPPSRGGAHPAAAAADA	SW	0	0	id_50_8017
BKP1_001036	WP_181003169.1 MULTISPECIES: hypothetical protein [Burkholderia]_132_162	WP_181003169.1	GenBank	132	162	PAAAAADAHAGHRHFDFDSAARHVTNDGGR	SW	0	0	id_50_8017
BKP1_001037	WP_181003169.1 MULTISPECIES: hypothetical protein [Burkholderia]_154_184	WP_181003169.1	GenBank	154	184	HVTNDGGRIGVEYVDAAQRTVVAVPPAEYE	SW	0	0	id_50_8017
BKP1_001038	WP_181003169.1 MULTISPECIES: hypothetical protein [Burkholderia]_176_206	WP_181003169.1	GenBank	176	206	AVPPAEYETTGFDGSWDNAFYITPPSQLKR	SW	0	0	id_50_8017
BKP1_001039	WP_181003169.1 MULTISPECIES: hypothetical protein [Burkholderia]_198_228	WP_181003169.1	GenBank	198	228	TPPSQLKRLAAQSKPGPAPGTRWYEQTVGA	SW	0	0	id_50_8017
BKP1_001040	WP_181003169.1 MULTISPECIES: hypothetical protein [Burkholderia]_220_250	WP_181003169.1	GenBank	220	250	WYEQTVGAPRAQGTNRVLWSDALQAPLVVE	SW	0	0	id_50_8017
BKP1_001041	WP_181003169.1 MULTISPECIES: hypothetical protein [Burkholderia]_242_272	WP_181003169.1	GenBank	242	272	LQAPLVVEYRSADGHASRKLTLTPAPRANA	SW	0	0	id_50_8017
BKP1_001042	WP_181003169.1 MULTISPECIES: hypothetical protein [Burkholderia]_261_291	WP_181003169.1	GenBank	261	291	LTLTPAPRANALPWRQLQSYTRKAYADYLD	SW	0	0	id_50_8017
BKP1_001043	WP_004190177.1 MULTISPECIES: ornithine carbamoyltransferase [Burkholderia]_000_030	WP_004190177.1	GenBank	0	30	MTAKTIRHYLQFKDFSLEDYEYVLERTGIL	SW	0	0	id_50_7573
BKP1_001044	WP_004190177.1 MULTISPECIES: ornithine carbamoyltransferase [Burkholderia]_022_052	WP_004190177.1	GenBank	22	52	VLERTGILKRKFKNYETYHPLHDRTLAMIF	SW	0	0	id_50_7573
BKP1_001045	WP_004190177.1 MULTISPECIES: ornithine carbamoyltransferase [Burkholderia]_044_074	WP_004190177.1	GenBank	44	74	DRTLAMIFEKSSTRTRLSFEAGIFQLGGHA	SW	0	0	id_50_7573
BKP1_001046	WP_004190177.1 MULTISPECIES: ornithine carbamoyltransferase [Burkholderia]_066_096	WP_004190177.1	GenBank	66	96	IFQLGGHAVFMSTRDTQLGRGEPVEDSAQV	SW	0	0	id_50_7573
BKP1_001047	WP_004190177.1 MULTISPECIES: ornithine carbamoyltransferase [Burkholderia]_088_118	WP_004190177.1	GenBank	88	118	PVEDSAQVISRMVDIIMIRTFEQDIIQRFA	SW	0	0	id_50_7573
BKP1_001048	WP_004190177.1 MULTISPECIES: ornithine carbamoyltransferase [Burkholderia]_110_140	WP_004190177.1	GenBank	110	140	QDIIQRFAENSRVPVINGLTNEYHPSQVLA	SW	0	1	id_50_7573
BKP1_001049	WP_004190177.1 MULTISPECIES: ornithine carbamoyltransferase [Burkholderia]_132_162	WP_004190177.1	GenBank	132	162	YHPSQVLADIFTYYEHRGPIRGKTVAWVGD	SW	0	0	id_50_7573
BKP1_001050	WP_004190177.1 MULTISPECIES: ornithine carbamoyltransferase [Burkholderia]_154_184	WP_004190177.1	GenBank	154	184	KTVAWVGDANNMLYTWIQAARILGFKLRLS	SW	0	0	id_50_7573
BKP1_001051	WP_004190177.1 MULTISPECIES: ornithine carbamoyltransferase [Burkholderia]_176_206	WP_004190177.1	GenBank	176	206	LGFKLRLSTPPGYALDTKLVDAESAPFYQV	SW	0	0	id_50_7573
BKP1_001052	WP_004190177.1 MULTISPECIES: ornithine carbamoyltransferase [Burkholderia]_198_228	WP_004190177.1	GenBank	198	228	ESAPFYQVFDDPNEASKGADLVTTDVWTSM	SW	0	1	id_50_7573
BKP1_001053	WP_004190177.1 MULTISPECIES: ornithine carbamoyltransferase [Burkholderia]_220_250	WP_004190177.1	GenBank	220	250	TTDVWTSMGFEAENEARKQAFADWSVDEEM	SW	0	1	id_50_7573
BKP1_001054	WP_004190177.1 MULTISPECIES: ornithine carbamoyltransferase [Burkholderia]_242_272	WP_004190177.1	GenBank	242	272	DWCVDEEMMSHAHPDALFMHCLPAHRGEEV	SW	2	2	id_50_7573
BKP1_001055	WP_004190177.1 MULTISPECIES: ornithine carbamoyltransferase [Burkholderia]_264_294	WP_004190177.1	GenBank	264	294	PAHRGEEVTAGVIDGPQSVVWDEAENRLHV	SW	0	0	id_50_7573
BKP1_001056	WP_004190177.1 MULTISPECIES: ornithine carbamoyltransferase [Burkholderia]_279_309	WP_004190177.1	GenBank	279	309	PQSVVWDEAENRLHVQKALMEFLLLGRLNH	SW	0	0	id_50_7573
BKP1_001057	tr|A0A0E1TSY9|A0A0E1TSY9_BURPE DNA-directed RNA polymerase OS=Burkholderia pseudomallei 576 OX=557724 GN=BUC_0008 PE=4 SV=1_000_030	A0A0E1TSY9	Uniprot	0	30	MLKIVFSRVRRAVRGRFAAIGSLHPFAMRA	SW	0	0	id_50_25074
BKP1_001058	tr|A0A0E1TSY9|A0A0E1TSY9_BURPE DNA-directed RNA polymerase OS=Burkholderia pseudomallei 576 OX=557724 GN=BUC_0008 PE=4 SV=1_009_039	A0A0E1TSY9	Uniprot	9	39	RRAVRGRFAAIGSLHPFAMRAWHANRMAGE	SW	0	0	id_50_25074
BKP1_001059	tr|A0A0E1UWB5|A0A0E1UWB5_BURPE DNA-directed RNA polymerase OS=Burkholderia pseudomallei Pakistan 9 OX=595498 GN=BUH_3910 PE=4 SV=1_0009	A0A0E1UWB5	Uniprot	0	30	MLKIVFSRARRAVRGRFAAIGSLHPFAMRA	SC	0	0	id_50_25074
BKP1_001060	WP_004531909.1 glycosyltransferase family 9 protein [Burkholderia pseudomallei]_000_030	WP_004531909.1	GenBank	0	30	MTLSRPPRTILVSSTRRLGDVLLTTPLVRS	SW	0	1	id_50_5251
BKP1_001061	WP_004531909.1 glycosyltransferase family 9 protein [Burkholderia pseudomallei]_022_052	WP_004531909.1	GenBank	22	52	LTTPLVRSLKARWPDAQIDMIVFRGTEGVL	SW	0	0	id_50_5251
BKP1_001062	WP_004531909.1 glycosyltransferase family 9 protein [Burkholderia pseudomallei]_044_074	WP_004531909.1	GenBank	44	74	FRGTEGVLEHNPDIRRVITVAPRARPKERI	SW	0	0	id_50_5251
BKP1_001063	WP_004531909.1 glycosyltransferase family 9 protein [Burkholderia pseudomallei]_066_096	WP_004531909.1	GenBank	66	96	RARPKERIADALRIWRKYDLASAAISSDRA	SW	0	1	id_50_5251
BKP1_001064	WP_004531909.1 glycosyltransferase family 9 protein [Burkholderia pseudomallei]_088_118	WP_004531909.1	GenBank	88	118	AAISSDRARFYAFFAGRRRIGLVDPGRLTR	SW	0	0	id_50_5251
BKP1_001065	WP_004531909.1 glycosyltransferase family 9 protein [Burkholderia pseudomallei]_110_140	WP_004531909.1	GenBank	110	140	VDPGRLTRLTRFILNGIVLDEHRDVHTVTS	SW	0	0	id_50_5251
BKP1_001066	WP_004531909.1 glycosyltransferase family 9 protein [Burkholderia pseudomallei]_132_162	WP_004531909.1	GenBank	132	162	RDVHTVTSNLSLADALDVPRSADVVAPGIG	SW	0	1	id_50_5251
BKP1_001067	WP_004531909.1 glycosyltransferase family 9 protein [Burkholderia pseudomallei]_154_184	WP_004531909.1	GenBank	154	184	DVVAPGIGDDPAARARFDAKLYGTPALSRG	SW	0	0	id_50_5251
BKP1_001068	WP_004531909.1 glycosyltransferase family 9 protein [Burkholderia pseudomallei]_176_206	WP_004531909.1	GenBank	176	206	GTPALSRGEPYIVLHPYPMFRYKQWHEDGW	SW	0	0	id_50_5251
BKP1_001069	WP_004531909.1 glycosyltransferase family 9 protein [Burkholderia pseudomallei]_198_228	WP_004531909.1	GenBank	198	228	KQWHEDGWVDLVRWARSSGFAVALSGGPAQ	SW	0	0	id_50_5251
BKP1_001070	WP_004531909.1 glycosyltransferase family 9 protein [Burkholderia pseudomallei]_220_250	WP_004531909.1	GenBank	220	250	ALSGGPAQAERDYAARIARAAGEPVLNMTG	SW	0	0	id_50_5251
BKP1_001071	WP_004531909.1 glycosyltransferase family 9 protein [Burkholderia pseudomallei]_242_272	WP_004531909.1	GenBank	242	272	EPVLNMTGELSFGESAEMFRHARLFIGPDT	SW	0	0	id_50_5251
BKP1_001072	WP_004531909.1 glycosyltransferase family 9 protein [Burkholderia pseudomallei]_264_294	WP_004531909.1	GenBank	264	294	RLFIGPDTGATHVAAASGVPTIALFGPSNP	SW	0	1	id_50_5251
BKP1_001073	WP_004531909.1 glycosyltransferase family 9 protein [Burkholderia pseudomallei]_286_316	WP_004531909.1	GenBank	286	316	ALFGPSNPTRWGPWPAHWPAGDEPWPLRGS	SW	0	0	id_50_5251
BKP1_001074	WP_004531909.1 glycosyltransferase family 9 protein [Burkholderia pseudomallei]_308_338	WP_004531909.1	GenBank	308	338	EPWPLRGSGRRGNVYLLQGEGDCVPCKLEG	SW	2	2	id_50_5251
BKP1_001075	WP_004531909.1 glycosyltransferase family 9 protein [Burkholderia pseudomallei]_330_360	WP_004531909.1	GenBank	330	360	CVPCKLEGCDRHLDSWSRCLSELPSARVIG	SW	4	4	id_50_5251
BKP1_001076	WP_004531909.1 glycosyltransferase family 9 protein [Burkholderia pseudomallei]_352_382	WP_004531909.1	GenBank	352	382	LPSARVIGVAAAMLGFDAANAPADVATPVD	SW	0	0	id_50_5251
BKP1_001077	WP_004531909.1 glycosyltransferase family 9 protein [Burkholderia pseudomallei]_360_390	WP_004531909.1	GenBank	360	390	VAAAMLGFDAANAPADVATPVDVSRLAARK	SW	0	0	id_50_5251
BKP1_001078	tr|A0A0F6L8L6|A0A0F6L8L6_BURPE Glycosyltransferase 9 family protein OS=Burkholderia pseudomallei MSHR4000 OX=1435370 GN=X980_3046 PE=4 SV=1_0136	A0A0F6L8L6	Uniprot	223	253	PVLNMTGELSFGESAEMFRRARLFIGPDTG	SC	0	0	id_50_5251
BKP1_001079	WP_038782634.1 glycosyltransferase family 9 protein [Burkholderia pseudomallei]_0270	WP_038782634.1	GenBank	97	127	FYAFFAGRRRIGLVDPGRLTWLTRFILNGI	SC	0	0	id_50_5251
BKP1_001080	WP_043291015.1 glycosyltransferase family 9 protein [Burkholderia pseudomallei]_0214	WP_043291015.1	GenBank	194	224	MFRYKQWHEDGWVDLVRWARGSGFAVALSG	SC	0	0	id_50_5251
BKP1_001081	WP_082257204.1 glycosyltransferase family 9 protein [Burkholderia pseudomallei]_0202	WP_082257204.1	GenBank	355	385	LSVRRVVDAASQLLGFAGVEASSAEIRVRP	SC	0	0	id_50_5251
BKP1_001082	WP_082257204.1 glycosyltransferase family 9 protein [Burkholderia pseudomallei]_0332	WP_082257204.1	GenBank	214	244	WLHANGFAVALTGGPAPAEQDYARRVAEAA	SC	0	0	id_50_5251
BKP1_001083	WP_082257204.1 glycosyltransferase family 9 protein [Burkholderia pseudomallei]_0347	WP_082257204.1	GenBank	139	169	TVTSGLALAPLVGVTPIAEVVAPGIGGDPV	SC	0	0	id_50_5251
BKP1_001084	WP_082257204.1 glycosyltransferase family 9 protein [Burkholderia pseudomallei]_0159	WP_082257204.1	GenBank	240	270	AEAANAPVGNLVGQLTLGETAELIRRAKLF	SC	0	0	id_50_5251
BKP1_001085	WP_082257204.1 glycosyltransferase family 9 protein [Burkholderia pseudomallei]_0287	WP_082257204.1	GenBank	57	87	NPDVRRVIVVAQRASLRERMADAIRIWRRY	SC	0	0	id_50_5251
BKP1_001086	WP_082257204.1 glycosyltransferase family 9 protein [Burkholderia pseudomallei]_0241	WP_082257204.1	GenBank	183	213	AAADTPIAVLHPSPMYAYKQWRIDGWAATI	SC	0	0	id_50_5251
BKP1_001087	WP_082257204.1 glycosyltransferase family 9 protein [Burkholderia pseudomallei]_0147	WP_082257204.1	GenBank	96	126	DRARFYTWFAGRKRIGLVDPERIGWLHRIM	SC	0	0	id_50_5251
BKP1_001088	WP_082257204.1 glycosyltransferase family 9 protein [Burkholderia pseudomallei]_0104	WP_082257204.1	GenBank	289	319	ALFGPSDPVRWGPWPQSWPANGAPWALRGS	SC	0	0	id_50_5251
BKP1_001089	WP_082257204.1 glycosyltransferase family 9 protein [Burkholderia pseudomallei]_0269	WP_082257204.1	GenBank	22	52	DVLLTTPLIRSLKARWPDAQVDVIVFRGTE	SC	0	0	id_50_5251
BKP1_001090	WP_082251820.1 glycosyltransferase family 9 protein [Burkholderia pseudomallei]_0053	WP_082251820.1	GenBank	118	148	IGWLHRIMFDRIAVNESRRVHTVTSGLALA	SC	0	0	id_50_5251
BKP1_001091	WP_004191516.1 MULTISPECIES: 4-hydroxy-tetrahydrodipicolinate synthase [Burkholderia]_000_030	WP_004191516.1	GenBank	0	30	MANGTQDGIQIRGSVPAIVTPMLEDGGLDL	SW	0	0	id_50_7876
BKP1_001092	WP_004191516.1 MULTISPECIES: 4-hydroxy-tetrahydrodipicolinate synthase [Burkholderia]_022_052	WP_004191516.1	GenBank	22	52	LEDGGLDLAAFRKLIDWHIEEGTDALVVVG	SW	0	0	id_50_7876
BKP1_001093	WP_004191516.1 MULTISPECIES: 4-hydroxy-tetrahydrodipicolinate synthase [Burkholderia]_044_074	WP_004191516.1	GenBank	44	74	TDALVVVGTSGESATLSVDEHVLMIETAVK	SW	0	0	id_50_7876
BKP1_001094	WP_004191516.1 MULTISPECIES: 4-hydroxy-tetrahydrodipicolinate synthase [Burkholderia]_066_096	WP_004191516.1	GenBank	66	96	LMIETAVKHAAKRIPIVAGAGGNSTTEAIE	SW	0	0	id_50_7876
BKP1_001095	WP_004191516.1 MULTISPECIES: 4-hydroxy-tetrahydrodipicolinate synthase [Burkholderia]_088_118	WP_004191516.1	GenBank	88	118	NSTTEAIELSKHAKAVGADATLQVVPYYNK	SW	0	0	id_50_7876
BKP1_001096	WP_004191516.1 MULTISPECIES: 4-hydroxy-tetrahydrodipicolinate synthase [Burkholderia]_110_140	WP_004191516.1	GenBank	110	140	QVVPYYNKPTQEGIYRHFKAIAEAVDLPVI	SW	0	0	id_50_7876
BKP1_001097	WP_004191516.1 MULTISPECIES: 4-hydroxy-tetrahydrodipicolinate synthase [Burkholderia]_132_162	WP_004191516.1	GenBank	132	162	EAVDLPVILYNVPGRTVADMSNETTLRLAQ	SW	0	0	id_50_7876
BKP1_001098	WP_004191516.1 MULTISPECIES: 4-hydroxy-tetrahydrodipicolinate synthase [Burkholderia]_154_184	WP_004191516.1	GenBank	154	184	ETTLRLAQVPGIIGVKDATGNIDRAAQLIK	SW	0	0	id_50_7876
BKP1_001099	WP_004191516.1 MULTISPECIES: 4-hydroxy-tetrahydrodipicolinate synthase [Burkholderia]_176_206	WP_004191516.1	GenBank	176	206	DRAAQLIKAAPAHFSIYSGDDPTAIALMLL	SW	0	0	id_50_7876
BKP1_001100	WP_004191516.1 MULTISPECIES: 4-hydroxy-tetrahydrodipicolinate synthase [Burkholderia]_198_228	WP_004191516.1	GenBank	198	228	TAIALMLLGGHGNISVTANVAPRAMSELSR	SW	0	1	id_50_7876
BKP1_001101	WP_004191516.1 MULTISPECIES: 4-hydroxy-tetrahydrodipicolinate synthase [Burkholderia]_220_250	WP_004191516.1	GenBank	220	250	RAMSELSRAALAADVKTAREIHMKLLSLHK	SW	0	1	id_50_7876
BKP1_001102	WP_004191516.1 MULTISPECIES: 4-hydroxy-tetrahydrodipicolinate synthase [Burkholderia]_242_272	WP_004191516.1	GenBank	242	272	MKLLSLHKHLFIEANPIPVKWALQQMGKIA	SW	0	0	id_50_7876
BKP1_001103	WP_004191516.1 MULTISPECIES: 4-hydroxy-tetrahydrodipicolinate synthase [Burkholderia]_264_294	WP_004191516.1	GenBank	264	294	LQQMGKIAGGIRLPLTPLDERSHETVRGAL	SW	0	0	id_50_7876
BKP1_001104	tr|A0A8D9SDL1|A0A8D9SDL1_BURPB Uncharacterized protein OS=Burkholderia pseudomallei (strain 1106b) OX=357347 GN=BURPS1106B_A0400 PE=4 SV=1_000_030	A0A8D9SDL1	Uniprot	0	30	MRRVSARRSPNVREARMSGNGSVNLYRRAA	SW	0	1	id_50_19200
BKP1_001105	tr|A0A8D9SDL1|A0A8D9SDL1_BURPB Uncharacterized protein OS=Burkholderia pseudomallei (strain 1106b) OX=357347 GN=BURPS1106B_A0400 PE=4 SV=1_022_052	A0A8D9SDL1	Uniprot	22	52	VNLYRRAAHRPRADRKGRRPKTGGGAGDNR	SW	0	0	id_50_19200
BKP1_001106	tr|A0A8D9SDL1|A0A8D9SDL1_BURPB Uncharacterized protein OS=Burkholderia pseudomallei (strain 1106b) OX=357347 GN=BURPS1106B_A0400 PE=4 SV=1_044_074	A0A8D9SDL1	Uniprot	44	74	GGGAGDNRSTAAHRPHAPASVDNGGRPDND	SW	0	1	id_50_19200
BKP1_001107	tr|A0A8D9SDL1|A0A8D9SDL1_BURPB Uncharacterized protein OS=Burkholderia pseudomallei (strain 1106b) OX=357347 GN=BURPS1106B_A0400 PE=4 SV=1_061_091	A0A8D9SDL1	Uniprot	61	91	PASVDNGGRPDNDRIAHRKSHITDRSGIDA	SW	0	0	id_50_19200
BKP1_001108	tr|A0A0E1URI5|A0A0E1URI5_BURPE Uncharacterized protein OS=Burkholderia pseudomallei Pakistan 9 OX=595498 GN=BUH_1054 PE=4 SV=1_0033	A0A0E1URI5	Uniprot	30	60	HRPRADRKGRRPKTGGRRGRQPVHGRAPAA	SC	0	0	id_50_19200
BKP1_001109	WP_223232941.1 hypothetical protein [Burkholderia pseudomallei]_000_030	WP_223232941.1	GenBank	0	30	MVRADARNPAAPRSRHAAARDTRIAARNMR	SW	0	0	id_50_19259
BKP1_001110	WP_223232941.1 hypothetical protein [Burkholderia pseudomallei]_022_052	WP_223232941.1	GenBank	22	52	RIAARNMRRRVATSRHRERDDAKIATQPIF	SW	0	0	id_50_19259
BKP1_001111	WP_223232941.1 hypothetical protein [Burkholderia pseudomallei]_044_074	WP_223232941.1	GenBank	44	74	KIATQPIFRSAMSIAFHSRSLSLPVALAAS	SW	0	1	id_50_19259
BKP1_001112	WP_223232941.1 hypothetical protein [Burkholderia pseudomallei]_058_088	WP_223232941.1	GenBank	58	88	AFHSRSLSLPVALAASSRMAGLNLKKRLPD	SW	0	1	id_50_19259
BKP1_001113	WP_235364466.1 hypothetical protein [Burkholderia pseudomallei]_0026	WP_235364466.1	GenBank	30	60	RRVATSRHRERDDAKITAQPMFRSAMSIAF	SC	0	0	id_50_19259
BKP1_001114	WP_235364466.1 hypothetical protein [Burkholderia pseudomallei]_0034	WP_235364466.1	GenBank	0	30	MVRTDARNPAAPRSRHAAARATRIAARNMR	SC	0	0	id_50_19259
BKP1_001115	WP_239148706.1 hypothetical protein [Burkholderia pseudomallei]_0056	WP_239148706.1	GenBank	32	62	VATSRHRERDDAKIVTQPIFRSAMSIAFHS	SC	0	0	id_50_19259
BKP1_001116	WP_076934420.1 hypothetical protein [Burkholderia pseudomallei]_000_030	WP_076934420.1	GenBank	0	30	MNKIKKRLITDKPRDRRHPLESGGEKITTF	SW	0	0	id_50_13889
BKP1_001117	WP_076934420.1 hypothetical protein [Burkholderia pseudomallei]_022_052	WP_076934420.1	GenBank	22	52	GGEKITTFVPLRFAKRGYQKVVVGPHGVDN	SW	0	0	id_50_13889
BKP1_001118	WP_076934420.1 hypothetical protein [Burkholderia pseudomallei]_044_074	WP_076934420.1	GenBank	44	74	VGPHGVDNPVEVTPVTSVIPPTLDARLLRV	SW	0	0	id_50_13889
BKP1_001119	WP_076934420.1 hypothetical protein [Burkholderia pseudomallei]_066_096	WP_076934420.1	GenBank	66	96	LDARLLRVLGRGFYWRHLLDSGEFSTAAEI	SW	0	0	id_50_13889
BKP1_001120	WP_076934420.1 hypothetical protein [Burkholderia pseudomallei]_088_118	WP_076934420.1	GenBank	88	118	EFSTAAEIGEREGVHKVTVNDAVRLSLLSP	SW	0	0	id_50_13889
BKP1_001121	WP_076934420.1 hypothetical protein [Burkholderia pseudomallei]_110_140	WP_076934420.1	GenBank	110	140	VRLSLLSPAIVEAALTGTLSRTVSLEALLR	SW	0	0	id_50_13889
BKP1_001122	WP_076934420.1 hypothetical protein [Burkholderia pseudomallei]_130_160	WP_076934420.1	GenBank	130	160	RTVSLEALLRTRMPADWNGQQSMLAAFADD	SW	0	1	id_50_13889
BKP1_001123	WP_196508929.1 hypothetical protein [Burkholderia pseudomallei]_0047	WP_196508929.1	GenBank	108	138	DAVRLSLLAPAIVEAALKGSLSRTISLEAL	SC	0	0	id_50_13889
BKP1_001124	WP_196508929.1 hypothetical protein [Burkholderia pseudomallei]_0090	WP_196508929.1	GenBank	64	94	PTLDARLLRTLGRGFYWRRLLDSGEFSTAA	SC	0	0	id_50_13889
BKP1_001125	WP_196508929.1 hypothetical protein [Burkholderia pseudomallei]_0129	WP_196508929.1	GenBank	0	30	MNRVKKRLVTDPPRERRHPLESGGEKITTF	SC	0	0	id_50_13889
BKP1_001126	WP_196508929.1 hypothetical protein [Burkholderia pseudomallei]_0096	WP_196508929.1	GenBank	17	47	HPLESGGEKITTFVPLRFAKRGHQKVVVGP	SC	0	0	id_50_13889
BKP1_001127	WP_063597958.1 hypothetical protein [Burkholderia pseudomallei]_0128	WP_063597958.1	GenBank	48	78	GVDNPVEVTPVTFVIPTTLDARLLRVLGRG	SC	0	0	id_50_13889
BKP1_001128	WP_196508929.1 hypothetical protein [Burkholderia pseudomallei]_0113	WP_196508929.1	GenBank	130	160	RTISLEALLRTRMPADWNGQQRTLAAPAND	SC	0	0	id_50_13889
BKP1_001129	WP_196508929.1 hypothetical protein [Burkholderia pseudomallei]_0086	WP_196508929.1	GenBank	48	78	GVDNPVEVIPITSVIPPTLDARLLRTLGRG	SC	0	0	id_50_13889
BKP1_001130	WP_196508929.1 hypothetical protein [Burkholderia pseudomallei]_0091	WP_196508929.1	GenBank	84	114	LDSGEFSTAAEIADREGVHKVTVNDAVRLS	SC	0	0	id_50_13889
BKP1_001131	tr|Q3JSD4|Q3JSD4_BURP1 Transcriptional regulator, LysR family OS=Burkholderia pseudomallei (strain 1710b) OX=320372 GN=BURPS1710b_2124 PE=3 SV=1_000_030	Q3JSD4	Uniprot	0	30	MRRTRPRRGPRGSSRSPRAGSSRAAPLVLT	SW	0	1	id_50_1149
BKP1_001132	tr|Q3JSD4|Q3JSD4_BURP1 Transcriptional regulator, LysR family OS=Burkholderia pseudomallei (strain 1710b) OX=320372 GN=BURPS1710b_2124 PE=3 SV=1_022_052	Q3JSD4	Uniprot	22	52	RAAPLVLTARPRVRLLVAHDLLGGGGQQIA	SW	0	0	id_50_1149
BKP1_001133	tr|Q3JSD4|Q3JSD4_BURP1 Transcriptional regulator, LysR family OS=Burkholderia pseudomallei (strain 1710b) OX=320372 GN=BURPS1710b_2124 PE=3 SV=1_044_074	Q3JSD4	Uniprot	44	74	GGGGQQIAEQPAVGLGHVDHLLDHLLRIEL	SW	0	0	id_50_1149
BKP1_001134	tr|Q3JSD4|Q3JSD4_BURP1 Transcriptional regulator, LysR family OS=Burkholderia pseudomallei (strain 1710b) OX=320372 GN=BURPS1710b_2124 PE=3 SV=1_066_096	Q3JSD4	Uniprot	66	96	DHLLRIELLERERERLGRRRVARRVEPAAR	SW	0	0	id_50_1149
BKP1_001135	tr|Q3JSD4|Q3JSD4_BURP1 Transcriptional regulator, LysR family OS=Burkholderia pseudomallei (strain 1710b) OX=320372 GN=BURPS1710b_2124 PE=3 SV=1_088_118	Q3JSD4	Uniprot	88	118	RRVEPAARRLHHPVVEARAVRPRVDDRDLD	SW	0	0	id_50_1149
BKP1_001136	tr|Q3JSD4|Q3JSD4_BURP1 Transcriptional regulator, LysR family OS=Burkholderia pseudomallei (strain 1710b) OX=320372 GN=BURPS1710b_2124 PE=3 SV=1_110_140	Q3JSD4	Uniprot	110	140	RVDDRDLDAMRGEFQVHRLGDRLERVLRRA	SW	0	0	id_50_1149
BKP1_001137	tr|Q3JSD4|Q3JSD4_BURP1 Transcriptional regulator, LysR family OS=Burkholderia pseudomallei (strain 1710b) OX=320372 GN=BURPS1710b_2124 PE=3 SV=1_132_162	Q3JSD4	Uniprot	132	162	LERVLRRAVRARVRARDEPRDRRHEHDPAP	SW	0	0	id_50_1149
BKP1_001138	tr|Q3JSD4|Q3JSD4_BURP1 Transcriptional regulator, LysR family OS=Burkholderia pseudomallei (strain 1710b) OX=320372 GN=BURPS1710b_2124 PE=3 SV=1_154_184	Q3JSD4	Uniprot	154	184	RHEHDPAPPARDHPARDLLRELERAEHVGL	SW	0	0	id_50_1149
BKP1_001139	tr|Q3JSD4|Q3JSD4_BURP1 Transcriptional regulator, LysR family OS=Burkholderia pseudomallei (strain 1710b) OX=320372 GN=BURPS1710b_2124 PE=3 SV=1_176_206	Q3JSD4	Uniprot	176	206	ERAEHVGLEQLANDVDGQIDERARLARARV	SW	0	0	id_50_1149
BKP1_001140	tr|Q3JSD4|Q3JSD4_BURP1 Transcriptional regulator, LysR family OS=Burkholderia pseudomallei (strain 1710b) OX=320372 GN=BURPS1710b_2124 PE=3 SV=1_198_228	Q3JSD4	Uniprot	198	228	ARLARARVVQQHVHVPARGLRALARARHVE	SW	0	0	id_50_1149
BKP1_001141	tr|Q3JSD4|Q3JSD4_BURP1 Transcriptional regulator, LysR family OS=Burkholderia pseudomallei (strain 1710b) OX=320372 GN=BURPS1710b_2124 PE=3 SV=1_220_250	Q3JSD4	Uniprot	220	250	LARARHVELHRVEREPAPRGLGAQLGDLRG	SW	0	0	id_50_1149
BKP1_001142	tr|Q3JSD4|Q3JSD4_BURP1 Transcriptional regulator, LysR family OS=Burkholderia pseudomallei (strain 1710b) OX=320372 GN=BURPS1710b_2124 PE=3 SV=1_242_272	Q3JSD4	Uniprot	242	272	AQLGDLRGDLHPRDHAMALRGEPQRDLAAE	SW	0	0	id_50_1149
BKP1_001143	tr|Q3JSD4|Q3JSD4_BURP1 Transcriptional regulator, LysR family OS=Burkholderia pseudomallei (strain 1710b) OX=320372 GN=BURPS1710b_2124 PE=3 SV=1_264_294	Q3JSD4	Uniprot	264	294	PQRDLAAETRARARHQNAFTRHVLAPSAAF	SW	0	0	id_50_1149
BKP1_001144	tr|Q3JSD4|Q3JSD4_BURP1 Transcriptional regulator, LysR family OS=Burkholderia pseudomallei (strain 1710b) OX=320372 GN=BURPS1710b_2124 PE=3 SV=1_286_316	Q3JSD4	Uniprot	286	316	VLAPCAAFRRVMKASTHTCAIAASSSTVPP	SW	2	2	id_50_1149
BKP1_001145	tr|Q3JSD4|Q3JSD4_BURP1 Transcriptional regulator, LysR family OS=Burkholderia pseudomallei (strain 1710b) OX=320372 GN=BURPS1710b_2124 PE=3 SV=1_308_338	Q3JSD4	Uniprot	308	338	ASSSTVPPDTPTAPTQRPSASTSGRPPPNV	SW	0	1	id_50_1149
BKP1_001146	tr|Q3JSD4|Q3JSD4_BURP1 Transcriptional regulator, LysR family OS=Burkholderia pseudomallei (strain 1710b) OX=320372 GN=BURPS1710b_2124 PE=3 SV=1_330_360	Q3JSD4	Uniprot	330	360	SGRPPPNVTSPPLLSSIERTGPPAPDSAPS	SW	0	1	id_50_1149
BKP1_001147	tr|Q3JSD4|Q3JSD4_BURP1 Transcriptional regulator, LysR family OS=Burkholderia pseudomallei (strain 1710b) OX=320372 GN=BURPS1710b_2124 PE=3 SV=1_352_382	Q3JSD4	Uniprot	352	382	PAPDSAPSDALGIRKRAAVPALRVARSIAP	SW	0	0	id_50_1149
BKP1_001148	tr|Q3JSD4|Q3JSD4_BURP1 Transcriptional regulator, LysR family OS=Burkholderia pseudomallei (strain 1710b) OX=320372 GN=BURPS1710b_2124 PE=3 SV=1_374_404	Q3JSD4	Uniprot	374	404	RVARSIAPMNASSIRANAARSAPASTTAIA	SW	0	1	id_50_1149
BKP1_001149	tr|Q3JSD4|Q3JSD4_BURP1 Transcriptional regulator, LysR family OS=Burkholderia pseudomallei (strain 1710b) OX=320372 GN=BURPS1710b_2124 PE=3 SV=1_396_426	Q3JSD4	Uniprot	396	426	PASTTAIATAAPTALRRAASATPASTMRSA	SW	0	1	id_50_1149
BKP1_001150	tr|Q3JSD4|Q3JSD4_BURP1 Transcriptional regulator, LysR family OS=Burkholderia pseudomallei (strain 1710b) OX=320372 GN=BURPS1710b_2124 PE=3 SV=1_418_448	Q3JSD4	Uniprot	418	448	PASTMRSARSSVSSGDIGGSLCGSTASQCR	SW	2	2	id_50_1149
BKP1_001151	tr|Q3JSD4|Q3JSD4_BURP1 Transcriptional regulator, LysR family OS=Burkholderia pseudomallei (strain 1710b) OX=320372 GN=BURPS1710b_2124 PE=3 SV=1_440_470	Q3JSD4	Uniprot	440	470	GSTASQSRDRRYLRESVFRSQTYQVFLMTM	SW	0	1	id_50_1149
BKP1_001152	tr|Q3JSD4|Q3JSD4_BURP1 Transcriptional regulator, LysR family OS=Burkholderia pseudomallei (strain 1710b) OX=320372 GN=BURPS1710b_2124 PE=3 SV=1_462_492	Q3JSD4	Uniprot	462	492	YQVFLMTMKRDPLGGLHVFMSVVTHGNFTR	SW	0	0	id_50_1149
BKP1_001153	tr|Q3JSD4|Q3JSD4_BURP1 Transcriptional regulator, LysR family OS=Burkholderia pseudomallei (strain 1710b) OX=320372 GN=BURPS1710b_2124 PE=3 SV=1_484_514	Q3JSD4	Uniprot	484	514	VTHGNFTRAAAALGLTPAAVSLAIGQLESE	SW	0	0	id_50_1149
BKP1_001154	tr|Q3JSD4|Q3JSD4_BURP1 Transcriptional regulator, LysR family OS=Burkholderia pseudomallei (strain 1710b) OX=320372 GN=BURPS1710b_2124 PE=3 SV=1_506_536	Q3JSD4	Uniprot	506	536	AIGQLESELKVKLFSRSTRGVSLTEAGQRY	SW	0	0	id_50_1149
BKP1_001155	tr|Q3JSD4|Q3JSD4_BURP1 Transcriptional regulator, LysR family OS=Burkholderia pseudomallei (strain 1710b) OX=320372 GN=BURPS1710b_2124 PE=3 SV=1_528_558	Q3JSD4	Uniprot	528	558	LTEAGQRYYDATAQPYRQVVDARDALNDAR	SW	0	0	id_50_1149
BKP1_001156	tr|Q3JSD4|Q3JSD4_BURP1 Transcriptional regulator, LysR family OS=Burkholderia pseudomallei (strain 1710b) OX=320372 GN=BURPS1710b_2124 PE=3 SV=1_550_580	Q3JSD4	Uniprot	550	580	RDALNDARDEPEGLLRISALHLAKSVVTAD	SW	0	0	id_50_1149
BKP1_001157	tr|Q3JSD4|Q3JSD4_BURP1 Transcriptional regulator, LysR family OS=Burkholderia pseudomallei (strain 1710b) OX=320372 GN=BURPS1710b_2124 PE=3 SV=1_572_602	Q3JSD4	Uniprot	572	602	AKSVVTADVLAEFFRRYPKVSVEIRYEDHL	SW	0	0	id_50_1149
BKP1_001158	tr|Q3JSD4|Q3JSD4_BURP1 Transcriptional regulator, LysR family OS=Burkholderia pseudomallei (strain 1710b) OX=320372 GN=BURPS1710b_2124 PE=3 SV=1_594_624	Q3JSD4	Uniprot	594	624	EIRYEDHLVDIVKERLDAGIRLADRLQSGM	SW	0	0	id_50_1149
BKP1_001159	tr|Q3JSD4|Q3JSD4_BURP1 Transcriptional regulator, LysR family OS=Burkholderia pseudomallei (strain 1710b) OX=320372 GN=BURPS1710b_2124 PE=3 SV=1_616_646	Q3JSD4	Uniprot	616	646	ADRLQSGMVGVKIAPALTSALVATPGYLAQ	SW	0	1	id_50_1149
BKP1_001160	tr|Q3JSD4|Q3JSD4_BURP1 Transcriptional regulator, LysR family OS=Burkholderia pseudomallei (strain 1710b) OX=320372 GN=BURPS1710b_2124 PE=3 SV=1_638_668	Q3JSD4	Uniprot	638	668	ATPGYLAQHGVPSKLADLARHMSIRFRFPK	SW	0	1	id_50_1149
BKP1_001161	tr|Q3JSD4|Q3JSD4_BURP1 Transcriptional regulator, LysR family OS=Burkholderia pseudomallei (strain 1710b) OX=320372 GN=BURPS1710b_2124 PE=3 SV=1_660_690	Q3JSD4	Uniprot	660	690	SIRFRFPKSGRLHKWPLRDGRRDVELDVAG	SW	0	1	id_50_1149
BKP1_001162	tr|Q3JSD4|Q3JSD4_BURP1 Transcriptional regulator, LysR family OS=Burkholderia pseudomallei (strain 1710b) OX=320372 GN=BURPS1710b_2124 PE=3 SV=1_682_712	Q3JSD4	Uniprot	682	712	DVELDVAGRFVSTDTGAVIDAARAGAGIAF	SW	0	0	id_50_1149
BKP1_001163	tr|Q3JSD4|Q3JSD4_BURP1 Transcriptional regulator, LysR family OS=Burkholderia pseudomallei (strain 1710b) OX=320372 GN=BURPS1710b_2124 PE=3 SV=1_704_734	Q3JSD4	Uniprot	704	734	RAGAGIAFVFMRERIEDDLRRGTLREVLPG	SW	0	0	id_50_1149
BKP1_001164	tr|Q3JSD4|Q3JSD4_BURP1 Transcriptional regulator, LysR family OS=Burkholderia pseudomallei (strain 1710b) OX=320372 GN=BURPS1710b_2124 PE=3 SV=1_726_756	Q3JSD4	Uniprot	726	756	TLREVLPGASRTLPPMWLYYANRKHVPPKL	SW	0	0	id_50_1149
BKP1_001165	tr|Q3JSD4|Q3JSD4_BURP1 Transcriptional regulator, LysR family OS=Burkholderia pseudomallei (strain 1710b) OX=320372 GN=BURPS1710b_2124 PE=3 SV=1_743_773	Q3JSD4	Uniprot	743	773	LYYANRKHVPPKLRAFIAVLREHAAADARR	SW	0	0	id_50_1149
BKP1_001166	WP_223871987.1 MULTISPECIES: hypothetical protein [Burkholderia]_000_030	WP_223871987.1	GenBank	0	30	MRAAIGRVAAVPPLRSFPRTPESRNGWQKT	SW	0	0	id_50_12979
BKP1_001167	WP_223871987.1 MULTISPECIES: hypothetical protein [Burkholderia]_022_052	WP_223871987.1	GenBank	22	52	SRNGWQKTQTEKARGRTGAIFQRGRADSAE	SW	0	0	id_50_12979
BKP1_001168	WP_223871987.1 MULTISPECIES: hypothetical protein [Burkholderia]_044_074	WP_223871987.1	GenBank	44	74	RGRADSAENSWFSRIFARKSLILEASAAMS	SW	0	0	id_50_12979
BKP1_001169	WP_223871987.1 MULTISPECIES: hypothetical protein [Burkholderia]_066_096	WP_223871987.1	GenBank	66	96	LEASAAMSRPVLATSRVVFATSPVFGPFAA	SW	0	0	id_50_12979
BKP1_001170	WP_223871987.1 MULTISPECIES: hypothetical protein [Burkholderia]_102_132	WP_223871987.1	GenBank	102	132	SKSLKKKKKEYVEEEEINRKDVPRVGRVLP	SW	0	0	id_50_12979
BKP1_001171	WP_270955903.1 hypothetical protein [Burkholderia pseudomallei]_0030	WP_270955903.1	GenBank	11	41	GFATSPVFAPAAAVPFSLLSNSLKKKKKEY	SC	0	0	id_50_12979
BKP1_001172	WP_270955903.1 hypothetical protein [Burkholderia pseudomallei]_0058	WP_270955903.1	GenBank	47	77	DRKAMPRVERVLPRVAGAAYFLGHESEGGA	SC	0	0	id_50_12979
BKP1_001173	WP_208836639.1 hypothetical protein [Burkholderia pseudomallei]_0040	WP_208836639.1	GenBank	79	109	FSWQMMASKSIKNQSVTYEKQGMPRIHELF	SC	0	0	id_50_12979
BKP1_001174	WP_195762393.1 Baseplate J family protein [Burkholderia pseudomallei]_0143	WP_195762393.1	GenBank	113	143	VQEQEINRKDAPRVRGVSPRVAEAAYYLGH	SC	0	0	id_50_12979
BKP1_001175	WP_270955903.1 hypothetical protein [Burkholderia pseudomallei]_0016	WP_270955903.1	GenBank	79	109	FSWQMMANENLKNQMVTYEQQGMPRIHELF	SC	0	0	id_50_12979
BKP1_001176	WP_208836639.1 hypothetical protein [Burkholderia pseudomallei]_0089	WP_208836639.1	GenBank	57	87	VLPRVADAAYFLGHESEGDATGFSWQMMAS	SC	0	0	id_50_12979
BKP1_001177	WP_195762393.1 Baseplate J family protein [Burkholderia pseudomallei]_0053	WP_195762393.1	GenBank	13	43	LRSFPRTPESRSGRQKAQTEKERGRTGAIF	SC	0	0	id_50_12979
BKP1_001178	WP_208836639.1 hypothetical protein [Burkholderia pseudomallei]_0055	WP_208836639.1	GenBank	26	56	FSSLSNSLKKKKKEYVEAAEIDRNAMPRVE	SC	0	0	id_50_12979
BKP1_001179	WP_195762393.1 Baseplate J family protein [Burkholderia pseudomallei]_0018	WP_195762393.1	GenBank	75	105	PVFATSRVVFATSPVFGPFATALFFSLSKS	SC	0	0	id_50_12979
BKP1_001180	WP_270955903.1 hypothetical protein [Burkholderia pseudomallei]_0008	WP_270955903.1	GenBank	28	58	LLSNSLKKKKKEYVEGAEIDRKAMPRVERV	SC	0	0	id_50_12979
BKP1_001181	WP_208836639.1 hypothetical protein [Burkholderia pseudomallei]_0051	WP_208836639.1	GenBank	11	41	VFATSPVFAPAAVTHFSSLSNSLKKKKKEY	SC	0	0	id_50_12979
BKP1_001182	WP_195762393.1 Baseplate J family protein [Burkholderia pseudomallei]_0138	WP_195762393.1	GenBank	44	74	RGRADSAENSWFPRIFARKSLILEASAAIS	SC	0	0	id_50_12979
BKP1_001183	WP_256722617.1 hypothetical protein [Burkholderia pseudomallei]_0010	WP_256722617.1	GenBank	6	36	ATSRVVFATSPVFGPFAATLFFSLSKSLKK	SC	0	0	id_50_12979
BKP1_001184	WP_004188424.1 MULTISPECIES: type 3 secretion system effector BapC [Burkholderia]_000_030	WP_004188424.1	GenBank	0	30	MSARRAEAARPRGYAARIARVAAAFAIGIV	SW	0	0	id_50_12209
BKP1_001185	WP_004188424.1 MULTISPECIES: type 3 secretion system effector BapC [Burkholderia]_022_052	WP_004188424.1	GenBank	22	52	AAFAIGIVSAGGVAHADSIDDAARRYGVNA	SW	0	1	id_50_12209
BKP1_001186	WP_004188424.1 MULTISPECIES: type 3 secretion system effector BapC [Burkholderia]_044_074	WP_004188424.1	GenBank	44	74	ARRYGVNADLLRSIAYYESGLNPRALHRNG	SW	0	0	id_50_12209
BKP1_001187	WP_004188424.1 MULTISPECIES: type 3 secretion system effector BapC [Burkholderia]_066_096	WP_004188424.1	GenBank	66	96	PRALHRNGDGSTDIGLMQINSVHLPALRDQ	SW	0	0	id_50_12209
BKP1_001188	WP_004188424.1 MULTISPECIES: type 3 secretion system effector BapC [Burkholderia]_088_118	WP_004188424.1	GenBank	88	118	HLPALRDQGIDRLRLYDASINARVGAALLR	SW	0	0	id_50_12209
BKP1_001189	WP_004188424.1 MULTISPECIES: type 3 secretion system effector BapC [Burkholderia]_110_140	WP_004188424.1	GenBank	110	140	RVGAALLRRQIDQYGDTWRAVGAYHSRTPG	SW	0	0	id_50_12209
BKP1_001190	WP_004188424.1 MULTISPECIES: type 3 secretion system effector BapC [Burkholderia]_132_162	WP_004188424.1	GenBank	132	162	AYHSRTPGLSERYARAVHDVYVARPWAAKA	SW	0	0	id_50_12209
BKP1_001191	WP_038767591.1 type 3 secretion system effector BapC [Burkholderia pseudomallei]_0047	WP_038767591.1	GenBank	0	30	MSVRRAEAARPRGYAVRIARVAAAFAIGIV	SC	0	0	id_50_12209
BKP1_001192	WP_004542145.1 type 3 secretion system effector BapC [Burkholderia pseudomallei]_0009	WP_004542145.1	GenBank	93	123	RDQGIDRLRLYDASVNARVGAALLRRQIDQ	SC	0	0	id_50_12209
BKP1_001193	WP_004536624.1 type 3 secretion system effector BapC [Burkholderia pseudomallei]_0002	WP_004536624.1	GenBank	157	187	WAAKAAARRDAAHTMPARVPGLVIEEASVQ	SC	0	0	id_50_12209
BKP1_001194	WP_004528813.1 type 3 secretion system effector BapC [Burkholderia pseudomallei]_0127	WP_004528813.1	GenBank	2	32	ARRAEAARPRGYAARIARVAATFAIGIVSA	SC	0	0	id_50_12209
BKP1_001195	WP_004542145.1 type 3 secretion system effector BapC [Burkholderia pseudomallei]_0141	WP_004542145.1	GenBank	154	184	ARPWAAKAAARRDAAPTMPARAPGLVIEEA	SC	0	0	id_50_12209
BKP1_001196	WP_223232930.1 MULTISPECIES: helix-turn-helix transcriptional regulator [Burkholderia]_000_030	WP_223232930.1	GenBank	0	30	MTDKPKKAATPRPSGRFIENPMPLPVERAL	SW	0	0	id_50_16148
BKP1_001197	WP_223232930.1 MULTISPECIES: helix-turn-helix transcriptional regulator [Burkholderia]_022_052	WP_223232930.1	GenBank	22	52	PLPVERALVAAGDDLALARRRRGLSTSSMA	SW	0	0	id_50_16148
BKP1_001198	WP_223232930.1 MULTISPECIES: helix-turn-helix transcriptional regulator [Burkholderia]_044_074	WP_223232930.1	GenBank	44	74	GLSTSSMAERAGISKKTLYRLEQGDPGVSW	SW	0	0	id_50_16148
BKP1_001199	WP_223232930.1 MULTISPECIES: helix-turn-helix transcriptional regulator [Burkholderia]_066_096	WP_223232930.1	GenBank	66	96	QGDPGVSWGAVIRVLNILNLLPELNKALNT	SW	0	0	id_50_16148
BKP1_001200	WP_223232930.1 MULTISPECIES: helix-turn-helix transcriptional regulator [Burkholderia]_088_118	WP_223232930.1	GenBank	88	118	ELNKALNTTNDALGLALMNKAVPKRIRVRK	SW	0	0	id_50_16148
BKP1_001201	WP_223232930.1 MULTISPECIES: helix-turn-helix transcriptional regulator [Burkholderia]_096_126	WP_223232930.1	GenBank	96	126	TNDALGLALMNKAVPKRIRVRKTNPDSGAL	SW	0	0	id_50_16148
BKP1_001202	WP_235513372.1 helix-turn-helix transcriptional regulator [Burkholderia pseudomallei]_0045	WP_235513372.1	GenBank	96	126	TNDALGLALMNKAVAKRIRVRKANPDSGAL	SC	0	0	id_50_16148
BKP1_001203	WP_230299924.1 helix-turn-helix transcriptional regulator [Burkholderia pseudomallei]_0078	WP_230299924.1	GenBank	0	30	MTDKPKIAATPKPSGRFTENPMPLPVERAL	SC	0	0	id_50_16148
BKP1_001204	WP_230941442.1 MULTISPECIES: helix-turn-helix transcriptional regulator [Burkholderia]_0001	WP_230941442.1	GenBank	64	94	LEQGDPGVSWGAVVRVLNILNILPELNKAL	SC	0	0	id_50_16148
BKP1_001205	WP_259675673.1 helix-turn-helix transcriptional regulator [Burkholderia pseudomallei]_0082	WP_259675673.1	GenBank	0	30	MTDKPKAAATPKSSGRFTVSPMPLPVERAL	SC	0	0	id_50_16148
BKP1_001206	WP_230941442.1 MULTISPECIES: helix-turn-helix transcriptional regulator [Burkholderia]_0038	WP_230941442.1	GenBank	2	32	DKPKAAATPKPSGRFTESPMPLPVERALVA	SC	0	0	id_50_16148
BKP1_001207	WP_009936854.1 AAA family ATPase [Burkholderia pseudomallei]_000_030	WP_009936854.1	GenBank	0	30	METISVFNNKGGVGKTTLTFHLAHAFAELG	SW	0	0	id_50_5978
BKP1_001208	WP_009936854.1 AAA family ATPase [Burkholderia pseudomallei]_022_052	WP_009936854.1	GenBank	22	52	AHAFAELGLRTLLIDLDPQSNLTILSMDAE	SW	0	1	id_50_5978
BKP1_001209	WP_009936854.1 AAA family ATPase [Burkholderia pseudomallei]_044_074	WP_009936854.1	GenBank	44	74	TILSMDAEELHRIWQEEDPFIEDFEAAKNA	SW	0	0	id_50_5978
BKP1_001210	WP_009936854.1 AAA family ATPase [Burkholderia pseudomallei]_066_096	WP_009936854.1	GenBank	66	96	DFEAAKNAMPATEFKGISSAPRSIHFILKP	SW	0	0	id_50_5978
BKP1_001211	WP_009936854.1 AAA family ATPase [Burkholderia pseudomallei]_088_118	WP_009936854.1	GenBank	88	118	SIHFILKPTEDGVSDLDDVSPPWNLAPSLD	SW	0	0	id_50_5978
BKP1_001212	WP_009936854.1 AAA family ATPase [Burkholderia pseudomallei]_110_140	WP_009936854.1	GenBank	110	140	WNLAPSLDLIPGRLTLHMYEDRLANRFPQA	SW	0	0	id_50_5978
BKP1_001213	WP_009936854.1 AAA family ATPase [Burkholderia pseudomallei]_132_162	WP_009936854.1	GenBank	132	162	LANRFPQAYQGDPLAIRTLTKFRSVAEAYS	SW	0	0	id_50_5978
BKP1_001214	WP_009936854.1 AAA family ATPase [Burkholderia pseudomallei]_154_184	WP_009936854.1	GenBank	154	184	RSVAEAYSHRYKYDIVIFDTSPSLGMLNKV	SW	0	0	id_50_5978
BKP1_001215	WP_009936854.1 AAA family ATPase [Burkholderia pseudomallei]_176_206	WP_009936854.1	GenBank	176	206	SLGMLNKVIISTTDGLVIPSMPDMFSLYGI	SW	0	1	id_50_5978
BKP1_001216	WP_009936854.1 AAA family ATPase [Burkholderia pseudomallei]_198_228	WP_009936854.1	GenBank	198	228	DMFSLYGIRNIGNSLRAWKSQFDSLYTLLT	SW	0	0	id_50_5978
BKP1_001217	WP_009936854.1 AAA family ATPase [Burkholderia pseudomallei]_220_250	WP_009936854.1	GenBank	220	250	DSLYTLLTKDKRRQFPDEYVRLLGYTIYNS	SW	0	0	id_50_5978
BKP1_001218	WP_009936854.1 AAA family ATPase [Burkholderia pseudomallei]_242_272	WP_009936854.1	GenBank	242	272	LGYTIYNSKKYSSRNKWDLATAHYNYAMQI	SW	0	0	id_50_5978
BKP1_001219	WP_009936854.1 AAA family ATPase [Burkholderia pseudomallei]_264_294	WP_009936854.1	GenBank	264	294	HYNYAMQIPPTIREYIGEQVLGHLTDEQLD	SW	0	0	id_50_5978
BKP1_001220	WP_009936854.1 AAA family ATPase [Burkholderia pseudomallei]_286_316	WP_009936854.1	GenBank	286	316	HLTDEQLDEPIGGTSVMHTHNTLPNMAQKY	SW	0	0	id_50_5978
BKP1_001221	WP_009936854.1 AAA family ATPase [Burkholderia pseudomallei]_308_338	WP_009936854.1	GenBank	308	338	LPNMAQKYHVPMWKVPSSKSLETDDISTIF	SW	0	1	id_50_5978
BKP1_001222	WP_009936854.1 AAA family ATPase [Burkholderia pseudomallei]_333_363	WP_009936854.1	GenBank	333	363	ISTIFGNRTTYEATREKYVGFAKDLLARMQ	SW	0	0	id_50_5978
BKP1_001223	tr|Q3JR87|Q3JR87_BURP1 Dodecin domain-containing protein OS=Burkholderia pseudomallei (strain 1710b) OX=320372 GN=BURPS1710b_2524 PE=4 SV=1_000_030	Q3JR87	Uniprot	0	30	MPAGPNLERLTGESVMNDHVYKLIELTGSS	SW	0	0	id_50_19929
BKP1_001224	tr|Q3JR87|Q3JR87_BURP1 Dodecin domain-containing protein OS=Burkholderia pseudomallei (strain 1710b) OX=320372 GN=BURPS1710b_2524 PE=4 SV=1_022_052	Q3JR87	Uniprot	22	52	LIELTGSSRQSSDDAIRNAINKAAKTVRNL	SW	0	0	id_50_19929
BKP1_001225	tr|Q3JR87|Q3JR87_BURP1 Dodecin domain-containing protein OS=Burkholderia pseudomallei (strain 1710b) OX=320372 GN=BURPS1710b_2524 PE=4 SV=1_044_074	Q3JR87	Uniprot	44	74	AAKTVRNLHWFEVTDMRGHIEGDQVIHWQV	SW	0	0	id_50_19929
BKP1_001226	tr|Q3JR87|Q3JR87_BURP1 Dodecin domain-containing protein OS=Burkholderia pseudomallei (strain 1710b) OX=320372 GN=BURPS1710b_2524 PE=4 SV=1_054_084	Q3JR87	Uniprot	54	84	FEVTDMRGHIEGDQVIHWQVTLKVGLRIED	SW	0	0	id_50_19929
BKP1_001227	WP_038740053.1 MULTISPECIES: helix-turn-helix domain-containing protein [Burkholderia]_000_030	WP_038740053.1	GenBank	0	30	MKTNVMHEQGDLFRAETTWFHVFHSMIETG	SW	0	0	id_50_11534
BKP1_001228	WP_038740053.1 MULTISPECIES: helix-turn-helix domain-containing protein [Burkholderia]_022_052	WP_038740053.1	GenBank	22	52	FHSMIETGDIARMGPYAVTVYLVIKAHTNF	SW	0	0	id_50_11534
BKP1_001229	WP_038740053.1 MULTISPECIES: helix-turn-helix domain-containing protein [Burkholderia]_044_074	WP_038740053.1	GenBank	44	74	VIKAHTNFNTGRSFPAIDTISAESGISRSQ	SW	0	0	id_50_11534
BKP1_001230	WP_038740053.1 MULTISPECIES: helix-turn-helix domain-containing protein [Burkholderia]_066_096	WP_038740053.1	GenBank	66	96	ESGISRSQVIRELKTLEAFGYITKTRDGRR	SW	0	0	id_50_11534
BKP1_001231	WP_038740053.1 MULTISPECIES: helix-turn-helix domain-containing protein [Burkholderia]_088_118	WP_038740053.1	GenBank	88	118	TKTRDGRRNEYRLREKVSIQDGAGRPTAVA	SW	0	0	id_50_11534
BKP1_001232	WP_038740053.1 MULTISPECIES: helix-turn-helix domain-containing protein [Burkholderia]_110_140	WP_038740053.1	GenBank	110	140	AGRPTAVATWDYLPSSVQAATADLKNVLVS	SW	0	0	id_50_11534
BKP1_001233	WP_038740053.1 MULTISPECIES: helix-turn-helix domain-containing protein [Burkholderia]_132_162	WP_038740053.1	GenBank	132	162	DLKNVLVSGDFAGSRIVQIERLQVNVTHAS	SW	0	0	id_50_11534
BKP1_001234	WP_038740053.1 MULTISPECIES: helix-turn-helix domain-containing protein [Burkholderia]_154_184	WP_038740053.1	GenBank	154	184	QVNVTHASGNAVVFNAQDIASLPQDMRDIL	SW	0	1	id_50_11534
BKP1_001235	WP_038740053.1 MULTISPECIES: helix-turn-helix domain-containing protein [Burkholderia]_174_204	WP_038740053.1	GenBank	174	204	SLPQDMRDILMSLRTKIEARRQEEVIHSSG	SW	0	1	id_50_11534
BKP1_001236	WP_172872410.1 helix-turn-helix domain-containing protein [Burkholderia pseudomallei]_0172	WP_172872410.1	GenBank	33	63	RMGPYAVTIYLVIKAHANFRTGRSFPAIET	SC	0	0	id_50_11534
BKP1_001237	WP_172872410.1 helix-turn-helix domain-containing protein [Burkholderia pseudomallei]_0171	WP_172872410.1	GenBank	72	102	SQVIRELKTLESFGYITKSREGRRNEYRLR	SC	0	0	id_50_11534
BKP1_001238	WP_015878375.1 helix-turn-helix domain-containing protein [Burkholderia pseudomallei]_0005	WP_015878375.1	GenBank	131	161	NVLVSGDFSGSRIVQIERLQVNITHASGNA	SC	0	0	id_50_11534
BKP1_001239	WP_172872410.1 helix-turn-helix domain-containing protein [Burkholderia pseudomallei]_0053	WP_172872410.1	GenBank	45	75	IKAHANFRTGRSFPAIETIATESGISRSQV	SC	0	0	id_50_11534
BKP1_001240	WP_172872410.1 helix-turn-helix domain-containing protein [Burkholderia pseudomallei]_0057	WP_172872410.1	GenBank	0	30	MNTNVMHGQGELFRAETTWFHVFHSMIETG	SC	0	0	id_50_11534
BKP1_001241	WP_076934336.1 MULTISPECIES: helix-turn-helix domain-containing protein [Burkholderia]_0000	WP_076934336.1	GenBank	119	149	WDYLPSTVQAATADLRNVLFSGDFAGARIV	SC	0	0	id_50_11534
BKP1_001242	WP_015878375.1 helix-turn-helix domain-containing protein [Burkholderia pseudomallei]_0035	WP_015878375.1	GenBank	40	70	VIKAHANFDTGKSFPGIDTITMESGISRSQ	SC	0	0	id_50_11534
BKP1_001243	WP_015878375.1 helix-turn-helix domain-containing protein [Burkholderia pseudomallei]_0024	WP_015878375.1	GenBank	66	96	SRSQVIRSLEVLEVNGYITRTRKGRRNEYR	SC	0	0	id_50_11534
BKP1_001244	WP_172872410.1 helix-turn-helix domain-containing protein [Burkholderia pseudomallei]_0162	WP_172872410.1	GenBank	106	136	IQDGSGQPTAVATWDYLPSSVQAATADLKN	SC	0	0	id_50_11534
BKP1_001245	WP_015878375.1 helix-turn-helix domain-containing protein [Burkholderia pseudomallei]_0076	WP_015878375.1	GenBank	102	132	IQDGAGRPAAVATWDYLPSSVKAATADLKN	SC	0	0	id_50_11534
BKP1_001246	WP_167242010.1 MULTISPECIES: helix-turn-helix domain-containing protein [Burkholderia]_0166	WP_167242010.1	GenBank	120	150	WDYLPSSVQAARADLQNVLLSGDFAGSRIV	SC	0	0	id_50_11534
BKP1_001247	WP_015878375.1 helix-turn-helix domain-containing protein [Burkholderia pseudomallei]_0050	WP_015878375.1	GenBank	22	52	IETGDIARIGPYAVTVYLVIKAHANFDTGK	SC	0	0	id_50_11534
BKP1_001248	WP_167242010.1 MULTISPECIES: helix-turn-helix domain-containing protein [Burkholderia]_0140	WP_167242010.1	GenBank	106	136	IRQEGADRPIAVATWDYLPSSVQAARADLQ	SC	0	0	id_50_11534
BKP1_001249	WP_076934336.1 MULTISPECIES: helix-turn-helix domain-containing protein [Burkholderia]_0128	WP_076934336.1	GenBank	38	68	AVTVYLVIKAHTNFKTGRSFPAIDTISAES	SC	0	0	id_50_11534
BKP1_001250	WP_167242010.1 MULTISPECIES: helix-turn-helix domain-containing protein [Burkholderia]_0096	WP_167242010.1	GenBank	50	80	NFNTGRSFPAIDTISDESGISRSQVIRELK	SC	0	0	id_50_11534
BKP1_001251	WP_004533844.1 erythritol/L-threitol dehydrogenase [Burkholderia pseudomallei]_000_030	WP_004533844.1	GenBank	0	30	MPQTAEAPPQRAAERGETPALPATMRAVVS	SW	0	0	id_50_5592
BKP1_001252	WP_004533844.1 erythritol/L-threitol dehydrogenase [Burkholderia pseudomallei]_022_052	WP_004533844.1	GenBank	22	52	ATMRAVVSHGPQDYRLEQVPVPKPGPDEIL	SW	0	0	id_50_5592
BKP1_001253	WP_004533844.1 erythritol/L-threitol dehydrogenase [Burkholderia pseudomallei]_044_074	WP_004533844.1	GenBank	44	74	KPGPDEILTQVERVGISMGDIKTFRGAPSF	SW	0	1	id_50_5592
BKP1_001254	WP_004533844.1 erythritol/L-threitol dehydrogenase [Burkholderia pseudomallei]_066_096	WP_004533844.1	GenBank	66	96	TFRGAPSFWGDAVQPRYVKPPMIPGHEFVS	SW	0	1	id_50_5592
BKP1_001255	WP_004533844.1 erythritol/L-threitol dehydrogenase [Burkholderia pseudomallei]_088_118	WP_004533844.1	GenBank	88	118	IPGHEFVSRVVALGPGAERRGVKAGDRVIS	SW	0	1	id_50_5592
BKP1_001256	WP_004533844.1 erythritol/L-threitol dehydrogenase [Burkholderia pseudomallei]_110_140	WP_004533844.1	GenBank	110	140	KAGDRVISEQIVPCWSCRFCGHGQYWMCQK	SW	4	4	id_50_5592
BKP1_001257	WP_004533844.1 erythritol/L-threitol dehydrogenase [Burkholderia pseudomallei]_132_162	WP_004533844.1	GenBank	132	162	GQYWMSQKHDLYGFQNNVHGAMAEYMIFTK	SW	0	0	id_50_5592
BKP1_001258	WP_004533844.1 erythritol/L-threitol dehydrogenase [Burkholderia pseudomallei]_154_184	WP_004533844.1	GenBank	154	184	AEYMIFTKEAIVHRVPDSIPTDEAILIEPL	SW	0	0	id_50_5592
BKP1_001259	WP_004533844.1 erythritol/L-threitol dehydrogenase [Burkholderia pseudomallei]_176_206	WP_004533844.1	GenBank	176	206	EAILIEPLSSSLHAADRANVGFDDVVVVAG	SW	0	1	id_50_5592
BKP1_001260	WP_004533844.1 erythritol/L-threitol dehydrogenase [Burkholderia pseudomallei]_198_228	WP_004533844.1	GenBank	198	228	DDVVVVAGAGTLGLGIIGAVRLRHPKQLIV	SW	0	0	id_50_5592
BKP1_001261	WP_004533844.1 erythritol/L-threitol dehydrogenase [Burkholderia pseudomallei]_220_250	WP_004533844.1	GenBank	220	250	RHPKQLIVLDMKPERAALARRMGADDVWNP	SW	0	0	id_50_5592
BKP1_001262	WP_004533844.1 erythritol/L-threitol dehydrogenase [Burkholderia pseudomallei]_242_272	WP_004533844.1	GenBank	242	272	GADDVWNPAEENVIEKIRAITGGYGSDIYI	SW	0	0	id_50_5592
BKP1_001263	WP_004533844.1 erythritol/L-threitol dehydrogenase [Burkholderia pseudomallei]_264_294	WP_004533844.1	GenBank	264	294	GYGSDIYIEATGHHRAVGQGLAMLRKLGRF	SW	0	0	id_50_5592
BKP1_001264	WP_004533844.1 erythritol/L-threitol dehydrogenase [Burkholderia pseudomallei]_286_316	WP_004533844.1	GenBank	286	316	MLRKLGRFVEFSVFNDEASVDWSIIGDRKE	SW	0	0	id_50_5592
BKP1_001265	WP_004533844.1 erythritol/L-threitol dehydrogenase [Burkholderia pseudomallei]_308_338	WP_004533844.1	GenBank	308	338	SIIGDRKELDVLGSHLGPYMYPRAIEFIAS	SW	0	0	id_50_5592
BKP1_001266	WP_004533844.1 erythritol/L-threitol dehydrogenase [Burkholderia pseudomallei]_330_360	WP_004533844.1	GenBank	330	360	RAIEFIASRRIDVRGIVTHTFPLSRFADAF	SW	0	0	id_50_5592
BKP1_001267	WP_004533844.1 erythritol/L-threitol dehydrogenase [Burkholderia pseudomallei]_348_378	WP_004533844.1	GenBank	348	378	HTFPLSRFADAFAVMERGEQSLKVVLDPRG	SW	0	0	id_50_5592
BKP1_001268	WP_004522178.1 MULTISPECIES: phosphatase PAP2 family protein [Burkholderia]_000_030	WP_004522178.1	GenBank	0	30	MWSAISDLGDAALTLPLSAACCAWLLRASP	SW	2	2	id_50_11831
BKP1_001269	WP_004522178.1 MULTISPECIES: phosphatase PAP2 family protein [Burkholderia]_022_052	WP_004522178.1	GenBank	22	52	AWLLRASPERRYAVSWLALLAAGMLVVGLT	SW	0	0	id_50_11831
BKP1_001270	WP_004522178.1 MULTISPECIES: phosphatase PAP2 family protein [Burkholderia]_044_074	WP_004522178.1	GenBank	44	74	GMLVVGLTKILYAGSGVQIRAIGFRVVSGH	SW	0	1	id_50_11831
BKP1_001271	WP_004522178.1 MULTISPECIES: phosphatase PAP2 family protein [Burkholderia]_088_118	WP_004522178.1	GenBank	88	118	GLQWLRSNAALAAGLALAALIGTARVFDEA	SW	0	0	id_50_11831
BKP1_001272	WP_004522178.1 MULTISPECIES: phosphatase PAP2 family protein [Burkholderia]_110_140	WP_004522178.1	GenBank	110	140	TARVFDEAHTVSEVVAGWALGTLVTVSFVR	SW	0	0	id_50_11831
BKP1_001273	WP_004522178.1 MULTISPECIES: phosphatase PAP2 family protein [Burkholderia]_132_162	WP_004522178.1	GenBank	132	162	LVTVSFVRWQRAPAMPARLWPYASASLLAV	SW	0	0	id_50_11831
BKP1_001274	WP_004522178.1 MULTISPECIES: phosphatase PAP2 family protein [Burkholderia]_160_190	WP_004522178.1	GenBank	160	190	AVMAIAYGRHAPIQAAIERYSPFLSRSFPW	SW	0	1	id_50_11831
BKP1_001275	WP_011852136.1 phosphatase PAP2 family protein [Burkholderia pseudomallei]_0016	WP_011852136.1	GenBank	27	57	ASPERRYAASWLALLAAGMLVAGLTKILYA	SC	0	0	id_50_11831
BKP1_001276	WP_208794356.1 phosphatase PAP2 family protein [Burkholderia pseudomallei]_0155	WP_208794356.1	GenBank	140	170	WQRAPAMSARLWPYASASLLAVTAIAYGRH	SC	0	0	id_50_11831
BKP1_001277	WP_230300159.1 phosphatase PAP2 family protein, partial [Burkholderia pseudomallei]_0108	WP_230300159.1	GenBank	149	179	RLWPYASASLLAVMAIAYQAVEIGYGVNGR	SC	0	0	id_50_11831
BKP1_001278	WP_038772802.1 phosphatase PAP2 family protein [Burkholderia pseudomallei]_0041	WP_038772802.1	GenBank	74	104	TMLASAVWPMALLFGLQWLRSNAALAAGLA	SC	0	0	id_50_11831
BKP1_001279	WP_122826211.1 phosphatase PAP2 family protein [Burkholderia pseudomallei]_0054	WP_122826211.1	GenBank	110	140	TARVFDEAHTVSEIVAGWALGTLVTVSFVR	SC	0	0	id_50_11831
BKP1_001280	WP_038752089.1 phosphatase PAP2 family protein [Burkholderia pseudomallei]_0149	WP_038752089.1	GenBank	64	94	AIGFRVVSGHTMLASAMWPMALLLGLQWLR	SC	0	0	id_50_11831
BKP1_001281	WP_076981927.1 phosphatase PAP2 family protein [Burkholderia pseudomallei]_0040	WP_076981927.1	GenBank	85	115	LLLGLQWLRSNAALAAGLALAELIGTARVF	SC	0	0	id_50_11831
BKP1_001282	WP_229277265.1 MULTISPECIES: HNH endonuclease signature motif containing protein [Burkholderia]_000_030	WP_229277265.1	GenBank	0	30	MPDLSNYTGNPPNAFALSAIHALEAAGFTI	SW	0	0	id_50_5897
BKP1_001283	WP_229277265.1 MULTISPECIES: HNH endonuclease signature motif containing protein [Burkholderia]_022_052	WP_229277265.1	GenBank	22	52	LEAAGFTIAPTTQGPNDQRKTLRITWRGVH	SW	0	0	id_50_5897
BKP1_001284	WP_229277265.1 MULTISPECIES: HNH endonuclease signature motif containing protein [Burkholderia]_044_074	WP_229277265.1	GenBank	44	74	RITWRGVHVGNMHEDLWGHTPPYASLYRFE	SW	0	0	id_50_5897
BKP1_001285	WP_229277265.1 MULTISPECIES: HNH endonuclease signature motif containing protein [Burkholderia]_066_096	WP_229277265.1	GenBank	66	96	YACLYRFEKNRAKAPPNFDKAEFALQHGCD	SW	2	2	id_50_5897
BKP1_001286	WP_229277265.1 MULTISPECIES: HNH endonuclease signature motif containing protein [Burkholderia]_088_118	WP_229277265.1	GenBank	88	118	FALQHGSDPNLLQVNSDYSGSYLWVQDEAT	SW	0	1	id_50_5897
BKP1_001287	WP_229277265.1 MULTISPECIES: HNH endonuclease signature motif containing protein [Burkholderia]_110_140	WP_229277265.1	GenBank	110	140	LWVQDEATSLLLMQDWARRIDEENRLESDW	SW	0	1	id_50_5897
BKP1_001288	WP_229277265.1 MULTISPECIES: HNH endonuclease signature motif containing protein [Burkholderia]_132_162	WP_229277265.1	GenBank	132	162	ENRLESDWSEPELRASVVAYLDMARRLRNG	SW	0	0	id_50_5897
BKP1_001289	WP_229277265.1 MULTISPECIES: HNH endonuclease signature motif containing protein [Burkholderia]_176_206	WP_229277265.1	GenBank	176	206	RIGRSEKSSEYRMQNISHVLALMGRDWIPG	SW	0	1	id_50_5897
BKP1_001290	WP_229277265.1 MULTISPECIES: HNH endonuclease signature motif containing protein [Burkholderia]_198_228	WP_229277265.1	GenBank	198	228	MGRDWIPGLPPAKNVGVRVTEQIETLISEL	SW	0	0	id_50_5897
BKP1_001291	WP_229277265.1 MULTISPECIES: HNH endonuclease signature motif containing protein [Burkholderia]_220_250	WP_229277265.1	GenBank	220	250	IETLISELEGRRESARATEAATVAKLRKTL	SW	0	1	id_50_5897
BKP1_001292	WP_229277265.1 MULTISPECIES: HNH endonuclease signature motif containing protein [Burkholderia]_264_294	WP_229277265.1	GenBank	264	294	STTTSVVRDPQVKAWVLERANGTCEACDQP	SW	2	2	id_50_5897
BKP1_001293	WP_229277265.1 MULTISPECIES: HNH endonuclease signature motif containing protein [Burkholderia]_308_338	WP_229277265.1	GenBank	308	338	HHLRRLADDGSDTPTNAVAVCPNCHRQLHF	SW	2	2	id_50_5897
BKP1_001294	WP_229277265.1 MULTISPECIES: HNH endonuclease signature motif containing protein [Burkholderia]_329_359	WP_229277265.1	GenBank	329	359	PNSHRQLHFSENARAYRETLYGKVAELVRE	SW	0	1	id_50_5897
BKP1_001295	WP_238329966.1 HNH endonuclease signature motif containing protein [Burkholderia pseudomallei]_0021	WP_238329966.1	GenBank	0	30	MPDLSNYTGNPLNAFALSVIHALEAAGFTI	SC	0	0	id_50_5897
BKP1_001296	WP_230384770.1 HNH endonuclease signature motif containing protein [Burkholderia pseudomallei]_0299	WP_230384770.1	GenBank	248	278	TLQQRPAGSKTPQKTTSTTTSIVRDPQVKA	SC	0	0	id_50_5897
BKP1_001297	WP_232340772.1 HNH endonuclease signature motif containing protein [Burkholderia pseudomallei]_0160	WP_232340772.1	GenBank	40	70	PTKLEADWTKSELRASVAAYLDMARRIRGG	SC	0	0	id_50_5897
BKP1_001298	WP_238329966.1 HNH endonuclease signature motif containing protein [Burkholderia pseudomallei]_0223	WP_238329966.1	GenBank	25	55	AGFTIAPTTRGPNDQRMTLRITWRGVHVGN	SC	0	0	id_50_5897
BKP1_001299	WP_232340772.1 HNH endonuclease signature motif containing protein [Burkholderia pseudomallei]_0030	WP_232340772.1	GenBank	153	183	IRRTLKKRPDGSKAPERTSSTTTNFIRDPQ	SC	0	0	id_50_5897
BKP1_001300	WP_259344394.1 HNH endonuclease signature motif containing protein [Burkholderia pseudomallei]_0110	WP_259344394.1	GenBank	127	157	SRANLEAPPELLQDRLESDWSESELRASVA	SC	0	0	id_50_5897
BKP1_001301	WP_232340772.1 HNH endonuclease signature motif containing protein [Burkholderia pseudomallei]_0065	WP_232340772.1	GenBank	15	45	RLLEDLDFEIVPKEKSSPVDERDGSPTKLE	SC	0	0	id_50_5897
BKP1_001302	WP_232340772.1 HNH endonuclease signature motif containing protein [Burkholderia pseudomallei]_0124	WP_232340772.1	GenBank	125	155	AGQIEALIGELEGRQESPRAADAVVVAKIR	SC	0	0	id_50_5897
BKP1_001303	WP_238329966.1 HNH endonuclease signature motif containing protein [Burkholderia pseudomallei]_0322	WP_238329966.1	GenBank	151	181	YLDMAHRLRNGQSVVKKQVYRDLSAKIDRS	SC	0	0	id_50_5897
BKP1_001304	WP_232340772.1 HNH endonuclease signature motif containing protein [Burkholderia pseudomallei]_0028	WP_232340772.1	GenBank	62	92	MARRIRGGQPVVKKQVYRNLAAQIDRTEKS	SC	0	0	id_50_5897
BKP1_001305	WP_259344394.1 HNH endonuclease signature motif containing protein [Burkholderia pseudomallei]_0329	WP_259344394.1	GenBank	105	135	EATSLLLMRDWARRIDEKIQSDSRANLEAP	SC	0	0	id_50_5897
BKP1_001306	WP_230384770.1 HNH endonuclease signature motif containing protein [Burkholderia pseudomallei]_0080	WP_230384770.1	GenBank	226	256	ELEGRHEPPRAAEAATVAKLRKTLQQRPAG	SC	0	0	id_50_5897
BKP1_001307	WP_232340772.1 HNH endonuclease signature motif containing protein [Burkholderia pseudomallei]_0107	WP_232340772.1	GenBank	104	134	ALMGRDWIKGLPPAKNVGARVAGQIEALIG	SC	0	0	id_50_5897
BKP1_001308	WP_259344394.1 HNH endonuclease signature motif containing protein [Burkholderia pseudomallei]_0248	WP_259344394.1	GenBank	85	115	NPDLLDVNRNDGKSYLRIKDEATSLLLMRD	SC	0	0	id_50_5897
BKP1_001309	WP_230944080.1 MULTISPECIES: HNH endonuclease signature motif containing protein [Burkholderia]_0285	WP_230944080.1	GenBank	123	153	QDWARRIDDENRLESDWSEPELGASVVAYL	SC	0	0	id_50_5897
BKP1_001310	WP_230384770.1 HNH endonuclease signature motif containing protein [Burkholderia pseudomallei]_0121	WP_230384770.1	GenBank	38	68	DQRKTLRITWRGVHIGNMHEDLWRHNPPYA	SC	0	0	id_50_5897
BKP1_001311	WP_259344394.1 HNH endonuclease signature motif containing protein [Burkholderia pseudomallei]_0037	WP_259344394.1	GenBank	252	282	LRKTLKQRPDGSKTPNKTTSTTTSVVRDPQ	SC	0	0	id_50_5897
BKP1_001312	WP_230944080.1 MULTISPECIES: HNH endonuclease signature motif containing protein [Burkholderia]_0299	WP_230944080.1	GenBank	38	68	DQRKTLRITWRGVHVGNMHDDLWGHNPPYA	SC	0	0	id_50_5897
BKP1_001313	WP_232340772.1 HNH endonuclease signature motif containing protein [Burkholderia pseudomallei]_0185	WP_232340772.1	GenBank	0	30	MLPSEFAGARDGKWHRLLEDLDFEIVPKEK	SC	0	0	id_50_5897
BKP1_001314	WP_230944080.1 MULTISPECIES: HNH endonuclease signature motif containing protein [Burkholderia]_0304	WP_230944080.1	GenBank	0	30	MPDLSNYTGNPPNAFALSVIHTLEAAGFTI	SC	0	0	id_50_5897
BKP1_001315	WP_230944080.1 MULTISPECIES: HNH endonuclease signature motif containing protein [Burkholderia]_0194	WP_230944080.1	GenBank	226	256	ELEGRHESPRATEAATVAKLRKTLKQRPAG	SC	0	0	id_50_5897
BKP1_001316	WP_232340772.1 HNH endonuclease signature motif containing protein [Burkholderia pseudomallei]_0096	WP_232340772.1	GenBank	165	195	KAPERTSSTTTNFIRDPQVKAWVLDRAEAT	SC	0	0	id_50_5897
BKP1_001317	WP_256722651.1 HNH endonuclease signature motif containing protein [Burkholderia pseudomallei]_0140	WP_256722651.1	GenBank	17	47	SAIHALEAAGFTIAPTTQGPNEQRKTLRIT	SC	0	0	id_50_5897
BKP1_001318	WP_232340772.1 HNH endonuclease signature motif containing protein [Burkholderia pseudomallei]_0203	WP_232340772.1	GenBank	93	123	EYRMQNISYVLALMGRDWIKGLPPAKNVGA	SC	0	0	id_50_5897
BKP1_001319	WP_256722651.1 HNH endonuclease signature motif containing protein [Burkholderia pseudomallei]_0199	WP_256722651.1	GenBank	247	277	KTLKQRPAGSKTPRKTTSTTTSVVRDPQVK	SC	0	0	id_50_5897
BKP1_001320	WP_259644350.1 HNH endonuclease signature motif containing protein [Burkholderia pseudomallei]_0184	WP_259644350.1	GenBank	292	322	QPAPFIGADGFPFLELHHLRRLADDGSDTP	SC	0	0	id_50_5897
BKP1_001321	WP_259344394.1 HNH endonuclease signature motif containing protein [Burkholderia pseudomallei]_0089	WP_259344394.1	GenBank	298	328	DQPAPFIGPDGFPFLEVHHLRRLADDGSDT	SC	0	0	id_50_5897
BKP1_001322	WP_230384770.1 HNH endonuclease signature motif containing protein [Burkholderia pseudomallei]_0316	WP_230384770.1	GenBank	120	150	LLMQDWARKIDEENRLESDWSEPELRASVV	SC	0	0	id_50_5897
BKP1_001323	WP_232340772.1 HNH endonuclease signature motif containing protein [Burkholderia pseudomallei]_0230	WP_232340772.1	GenBank	199	229	DQPAPFSGADGFPFLEVHHLRKLADGGSDT	SC	0	0	id_50_5897
BKP1_001324	tr|A0A0E1VUG7|A0A0E1VUG7_BURPE Multidrug efflux pump BpeE OS=Burkholderia pseudomallei 1710a OX=320371 GN=bpeE PE=3 SV=1_000_030	A0A0E1VUG7	Uniprot	0	30	MHRADAVFIRIQNNRQPGGFFMAILRTSRS	SW	0	0	id_50_4462
BKP1_001325	tr|A0A0E1VUG7|A0A0E1VUG7_BURPE Multidrug efflux pump BpeE OS=Burkholderia pseudomallei 1710a OX=320371 GN=bpeE PE=3 SV=1_022_052	A0A0E1VUG7	Uniprot	22	52	AILRTSRSRIAAAAFAVVFIAGLGTFGAIR	SW	0	0	id_50_4462
BKP1_001326	tr|A0A0E1VUG7|A0A0E1VUG7_BURPE Multidrug efflux pump BpeE OS=Burkholderia pseudomallei 1710a OX=320371 GN=bpeE PE=3 SV=1_044_074	A0A0E1VUG7	Uniprot	44	74	LGTFGAIRVNAGAPEKSAAPLPEVDVATVL	SW	0	0	id_50_4462
BKP1_001327	tr|A0A0E1VUG7|A0A0E1VUG7_BURPE Multidrug efflux pump BpeE OS=Burkholderia pseudomallei 1710a OX=320371 GN=bpeE PE=3 SV=1_066_096	A0A0E1VUG7	Uniprot	66	96	EVDVATVLSKTITDWQSYSGRLEAVEKVDV	SW	0	0	id_50_4462
BKP1_001328	tr|A0A0E1VUG7|A0A0E1VUG7_BURPE Multidrug efflux pump BpeE OS=Burkholderia pseudomallei 1710a OX=320371 GN=bpeE PE=3 SV=1_088_118	A0A0E1VUG7	Uniprot	88	118	EAVEKVDVRPLVSGTIVSVNFKDGALVKKG	SW	0	0	id_50_4462
BKP1_001329	tr|A0A0E1VUG7|A0A0E1VUG7_BURPE Multidrug efflux pump BpeE OS=Burkholderia pseudomallei 1710a OX=320371 GN=bpeE PE=3 SV=1_110_140	A0A0E1VUG7	Uniprot	110	140	DGALVKKGDVLFVIDPRPYQAEVDRAAAQL	SW	0	0	id_50_4462
BKP1_001330	tr|A0A0E1VUG7|A0A0E1VUG7_BURPE Multidrug efflux pump BpeE OS=Burkholderia pseudomallei 1710a OX=320371 GN=bpeE PE=3 SV=1_132_162	A0A0E1VUG7	Uniprot	132	162	VDRAAAQLAGAQARNGYAQSDWQRAQRLIG	SW	0	0	id_50_4462
BKP1_001331	tr|A0A0E1VUG7|A0A0E1VUG7_BURPE Multidrug efflux pump BpeE OS=Burkholderia pseudomallei 1710a OX=320371 GN=bpeE PE=3 SV=1_154_184	A0A0E1VUG7	Uniprot	154	184	QRAQRLIGDNAIAKRDYDEKQNAAREASAN	SW	0	0	id_50_4462
BKP1_001332	tr|A0A0E1VUG7|A0A0E1VUG7_BURPE Multidrug efflux pump BpeE OS=Burkholderia pseudomallei 1710a OX=320371 GN=bpeE PE=3 SV=1_176_206	A0A0E1VUG7	Uniprot	176	206	AAREASANLKAAEAALETARINLGYTRITA	SW	0	0	id_50_4462
BKP1_001333	tr|A0A0E1VUG7|A0A0E1VUG7_BURPE Multidrug efflux pump BpeE OS=Burkholderia pseudomallei 1710a OX=320371 GN=bpeE PE=3 SV=1_198_228	A0A0E1VUG7	Uniprot	198	228	LGYTRITAPVSGRVSRAEITLGNVVSAGAS	SW	0	0	id_50_4462
BKP1_001334	tr|A0A0E1VUG7|A0A0E1VUG7_BURPE Multidrug efflux pump BpeE OS=Burkholderia pseudomallei 1710a OX=320371 GN=bpeE PE=3 SV=1_220_250	A0A0E1VUG7	Uniprot	220	250	NVVSAGASAAPLTTLVSVSPIYASFDADEQ	SW	0	0	id_50_4462
BKP1_001335	tr|A0A0E1VUG7|A0A0E1VUG7_BURPE Multidrug efflux pump BpeE OS=Burkholderia pseudomallei 1710a OX=320371 GN=bpeE PE=3 SV=1_242_272	A0A0E1VUG7	Uniprot	242	272	ASFDADEQTYLQYIGGAKDGRKVPVELGLA	SW	0	0	id_50_4462
BKP1_001336	tr|A0A0E1VUG7|A0A0E1VUG7_BURPE Multidrug efflux pump BpeE OS=Burkholderia pseudomallei 1710a OX=320371 GN=bpeE PE=3 SV=1_264_294	A0A0E1VUG7	Uniprot	264	294	VPVELGLANESGYSRQGVIDSVDNRLDTSS	SW	0	0	id_50_4462
BKP1_001337	tr|A0A0E1VUG7|A0A0E1VUG7_BURPE Multidrug efflux pump BpeE OS=Burkholderia pseudomallei 1710a OX=320371 GN=bpeE PE=3 SV=1_286_316	A0A0E1VUG7	Uniprot	286	316	DNRLDTSSGTIRVRARFDNADGALVPGLYA	SW	0	0	id_50_4462
BKP1_001338	tr|A0A0E1VUG7|A0A0E1VUG7_BURPE Multidrug efflux pump BpeE OS=Burkholderia pseudomallei 1710a OX=320371 GN=bpeE PE=3 SV=1_308_338	A0A0E1VUG7	Uniprot	308	338	ALVPGLYARVKVGGSAPHPALLIDDAAINT	SW	0	0	id_50_4462
BKP1_001339	tr|A0A0E1VUG7|A0A0E1VUG7_BURPE Multidrug efflux pump BpeE OS=Burkholderia pseudomallei 1710a OX=320371 GN=bpeE PE=3 SV=1_330_360	A0A0E1VUG7	Uniprot	330	360	IDDAAINTDQDKKFVFVVDQQGRVSYREVQ	SW	0	0	id_50_4462
BKP1_001340	tr|A0A0E1VUG7|A0A0E1VUG7_BURPE Multidrug efflux pump BpeE OS=Burkholderia pseudomallei 1710a OX=320371 GN=bpeE PE=3 SV=1_352_382	A0A0E1VUG7	Uniprot	352	382	RVSYREVQLGAQHGNQRVIVGGLAASERIV	SW	0	0	id_50_4462
BKP1_001341	tr|A0A0E1VUG7|A0A0E1VUG7_BURPE Multidrug efflux pump BpeE OS=Burkholderia pseudomallei 1710a OX=320371 GN=bpeE PE=3 SV=1_374_404	A0A0E1VUG7	Uniprot	374	404	LAASERIVVNGTQRVRPGEQVKPHLVPMTG	SW	0	0	id_50_4462
BKP1_001342	tr|A0A0E1VUG7|A0A0E1VUG7_BURPE Multidrug efflux pump BpeE OS=Burkholderia pseudomallei 1710a OX=320371 GN=bpeE PE=3 SV=1_396_426	A0A0E1VUG7	Uniprot	396	426	PHLVPMTGGDDAAAATPVAGGVQRPRAAQG	SW	0	0	id_50_4462
BKP1_001343	tr|A0A0E1VUG7|A0A0E1VUG7_BURPE Multidrug efflux pump BpeE OS=Burkholderia pseudomallei 1710a OX=320371 GN=bpeE PE=3 SV=1_400_430	A0A0E1VUG7	Uniprot	400	430	PMTGGDDAAAATPVAGGVQRPRAAQGNARA	SW	0	0	id_50_4462
BKP1_001344	WP_038743721.1 MULTISPECIES: TraK family protein [Burkholderia]_000_030	WP_038743721.1	GenBank	0	30	MKTLSERIAARVGTAPASTSHSNRAVVMAL	SW	0	0	id_50_17157
BKP1_001345	WP_038743721.1 MULTISPECIES: TraK family protein [Burkholderia]_022_052	WP_038743721.1	GenBank	22	52	NRAVVMALREDIQQAISDGWSILAIYRTLH	SW	0	0	id_50_17157
BKP1_001346	WP_038743721.1 MULTISPECIES: TraK family protein [Burkholderia]_044_074	WP_038743721.1	GenBank	44	74	LAIYRTLHDEGQVVFSYQAFRRHVNRLLLG	SW	0	0	id_50_17157
BKP1_001347	WP_038743721.1 MULTISPECIES: TraK family protein [Burkholderia]_066_096	WP_038743721.1	GenBank	66	96	HVNRLLLGKAASKTRSTRSLRKQAIESTLS	SW	0	0	id_50_17157
BKP1_001348	WP_038743721.1 MULTISPECIES: TraK family protein [Burkholderia]_083_113	WP_038743721.1	GenBank	83	113	RSLRKQAIESTLSPVQSFTFNAQPNEKDLL	SW	0	0	id_50_17157
BKP1_001349	WP_063806550.1 MULTISPECIES: TraK family protein [Burkholderia]_0058	WP_063806550.1	GenBank	73	103	GKAASKTRPTRSLRKQAAESPLSPVQSFTF	SC	0	0	id_50_17157
BKP1_001350	tr|A3NPC6|A3NPC6_BURP6 Uncharacterized protein OS=Burkholderia pseudomallei (strain 668) OX=320373 GN=BURPS668_A3206 PE=4 SV=1_022_052	A3NPC6	Uniprot	22	52	LPVVCLSSACRLPVVCLSFARRSSGGFAAA	SW	3	3	id_50_6340
BKP1_001351	tr|A3NPC6|A3NPC6_BURP6 Uncharacterized protein OS=Burkholderia pseudomallei (strain 668) OX=320373 GN=BURPS668_A3206 PE=4 SV=1_044_074	A3NPC6	Uniprot	44	74	SSGGFAAARLRGRDLALHRAPRRASERTNA	SW	0	1	id_50_6340
BKP1_001352	tr|A3NPC6|A3NPC6_BURP6 Uncharacterized protein OS=Burkholderia pseudomallei (strain 668) OX=320373 GN=BURPS668_A3206 PE=4 SV=1_066_096	A3NPC6	Uniprot	66	96	RASERTNAWPGGRRRSAGGSAQRSAARHGT	SW	0	1	id_50_6340
BKP1_001353	tr|A3NPC6|A3NPC6_BURP6 Uncharacterized protein OS=Burkholderia pseudomallei (strain 668) OX=320373 GN=BURPS668_A3206 PE=4 SV=1_088_118	A3NPC6	Uniprot	88	118	RSAARHGTVRRARQPNVQPGGMPGSVSRAG	SW	0	1	id_50_6340
BKP1_001354	tr|A3NPC6|A3NPC6_BURP6 Uncharacterized protein OS=Burkholderia pseudomallei (strain 668) OX=320373 GN=BURPS668_A3206 PE=4 SV=1_110_140	A3NPC6	Uniprot	110	140	PGSVSRAGQPALIRINRPRHVDRRGARRAH	SW	0	1	id_50_6340
BKP1_001355	tr|A3NPC6|A3NPC6_BURP6 Uncharacterized protein OS=Burkholderia pseudomallei (strain 668) OX=320373 GN=BURPS668_A3206 PE=4 SV=1_132_162	A3NPC6	Uniprot	132	162	RRGARRAHAFTPRCHRGPAAATPCVERSRD	SW	2	2	id_50_6340
BKP1_001356	tr|A3NPC6|A3NPC6_BURP6 Uncharacterized protein OS=Burkholderia pseudomallei (strain 668) OX=320373 GN=BURPS668_A3206 PE=4 SV=1_154_184	A3NPC6	Uniprot	154	184	PSVERSRDDARRGPRAGPPSGVPSSGVRTR	SW	0	1	id_50_6340
BKP1_001357	tr|A3NPC6|A3NPC6_BURP6 Uncharacterized protein OS=Burkholderia pseudomallei (strain 668) OX=320373 GN=BURPS668_A3206 PE=4 SV=1_176_206	A3NPC6	Uniprot	176	206	PSSGVRTRRRRRRRCNAWPSGCSLTKVLLH	SW	2	2	id_50_6340
BKP1_001358	tr|A3NPC6|A3NPC6_BURP6 Uncharacterized protein OS=Burkholderia pseudomallei (strain 668) OX=320373 GN=BURPS668_A3206 PE=4 SV=1_198_228	A3NPC6	Uniprot	198	228	SLTKVLLHGGSVVGMLDSRSHPPPGLRRRN	SW	0	1	id_50_6340
BKP1_001359	tr|A3NPC6|A3NPC6_BURP6 Uncharacterized protein OS=Burkholderia pseudomallei (strain 668) OX=320373 GN=BURPS668_A3206 PE=4 SV=1_220_250	A3NPC6	Uniprot	220	250	PPGLRRRNARSSGSLLAEAPHRRGAAAGMP	SW	0	1	id_50_6340
BKP1_001360	tr|A3NPC6|A3NPC6_BURP6 Uncharacterized protein OS=Burkholderia pseudomallei (strain 668) OX=320373 GN=BURPS668_A3206 PE=4 SV=1_242_272	A3NPC6	Uniprot	242	272	RGAAAGMPDHRDARSPGSALSGILGRRVTP	SW	0	1	id_50_6340
BKP1_001361	tr|A3NPC6|A3NPC6_BURP6 Uncharacterized protein OS=Burkholderia pseudomallei (strain 668) OX=320373 GN=BURPS668_A3206 PE=4 SV=1_264_294	A3NPC6	Uniprot	264	294	ILGRRVTPPPEYSVALRAAPSERREASAGR	SW	0	1	id_50_6340
BKP1_001362	tr|A3NPC6|A3NPC6_BURP6 Uncharacterized protein OS=Burkholderia pseudomallei (strain 668) OX=320373 GN=BURPS668_A3206 PE=4 SV=1_286_316	A3NPC6	Uniprot	286	316	RREASAGRTTAIAAAIGRNRERQRFRRSRP	SW	0	0	id_50_6340
BKP1_001363	tr|A3NPC6|A3NPC6_BURP6 Uncharacterized protein OS=Burkholderia pseudomallei (strain 668) OX=320373 GN=BURPS668_A3206 PE=4 SV=1_308_338	A3NPC6	Uniprot	308	338	QRFRRSRPSPRSRAITRYPLHTARRPPHVA	SW	0	0	id_50_6340
BKP1_001364	tr|A3NPC6|A3NPC6_BURP6 Uncharacterized protein OS=Burkholderia pseudomallei (strain 668) OX=320373 GN=BURPS668_A3206 PE=4 SV=1_320_350	A3NPC6	Uniprot	320	350	RAITRYPLHTARRPPHVASRPPPAAGREPA	SW	0	0	id_50_6340
BKP1_001365	tr|A0A8H2QI25|A0A8H2QI25_BURPE Uncharacterized protein OS=Burkholderia pseudomallei OX=28450 GN=SAMEA1968934_02383 PE=4 SV=1_0197	A0A8H2QI25	Uniprot	177	207	RREASAGRPTAIAAAIGRNRERQRFRRSRR	SC	0	0	id_50_6340
BKP1_001366	tr|C4I3Y9|C4I3Y9_BURPE Uncharacterized protein OS=Burkholderia pseudomallei MSHR346 OX=536230 GN=GBP346_B2565 PE=4 SV=1_0052	C4I3Y9	Uniprot	6	36	RAGQPALIRINRPRHVNRRGARRAHAFTPR	SC	0	0	id_50_6340
BKP1_001367	tr|A0A0E1VQB2|A0A0E1VQB2_BURPE Uncharacterized protein OS=Burkholderia pseudomallei 1710a OX=320371 GN=BURPS1710A_A2379 PE=4 SV=1_0046	A0A0E1VQB2	Uniprot	82	112	NAWPGGRRRSAGGSAQRGTARHGAARTAAE	SC	0	0	id_50_6340
BKP1_001368	tr|A0A8H2QI25|A0A8H2QI25_BURPE Uncharacterized protein OS=Burkholderia pseudomallei OX=28450 GN=SAMEA1968934_02383 PE=4 SV=1_0145	A0A8H2QI25	Uniprot	6	36	RAGQPALIRINRPRRIDRRGARRAHAFTPR	SC	0	0	id_50_6340
BKP1_001369	WP_235511706.1 site-specific integrase [Burkholderia pseudomallei]_000_030	WP_235511706.1	GenBank	0	30	MFLDFLLHFCCSRAAIIPAPPRYTLFPHQQ	SW	2	2	id_50_4967
BKP1_001370	WP_235511706.1 site-specific integrase [Burkholderia pseudomallei]_022_052	WP_235511706.1	GenBank	22	52	YTLFPHQQEQELATIINRGPHQYQAQVRRK	SW	0	0	id_50_4967
BKP1_001371	WP_235511706.1 site-specific integrase [Burkholderia pseudomallei]_044_074	WP_235511706.1	GenBank	44	74	YQAQVRRKGYPTQTKTFETKKRAEEWATSV	SW	0	0	id_50_4967
BKP1_001372	WP_235511706.1 site-specific integrase [Burkholderia pseudomallei]_066_096	WP_235511706.1	GenBank	66	96	AEEWATSVENEMNRGSFVDRSELEATTFGE	SW	0	0	id_50_4967
BKP1_001373	WP_235511706.1 site-specific integrase [Burkholderia pseudomallei]_088_118	WP_235511706.1	GenBank	88	118	LEATTFGELLDRYAEEVTSAKRGRETEMVR	SW	0	0	id_50_4967
BKP1_001374	WP_235511706.1 site-specific integrase [Burkholderia pseudomallei]_110_140	WP_235511706.1	GenBank	110	140	GRETEMVRIRALKKHALAARTLASLRSMDF	SW	0	0	id_50_4967
BKP1_001375	WP_235511706.1 site-specific integrase [Burkholderia pseudomallei]_132_162	WP_235511706.1	GenBank	132	162	ASLRSMDFANYRNERLKTCCPATVKRELVI	SW	2	2	id_50_4967
BKP1_001376	WP_235511706.1 site-specific integrase [Burkholderia pseudomallei]_154_184	WP_235511706.1	GenBank	154	184	TVKRELVIISHVFTQASNEWSLPVGNPLAG	SW	0	0	id_50_4967
BKP1_001377	WP_235511706.1 site-specific integrase [Burkholderia pseudomallei]_176_206	WP_235511706.1	GenBank	176	206	PVGNPLAGVAKPREKDHRERRLRDDEESRL	SW	0	0	id_50_4967
BKP1_001378	WP_235511706.1 site-specific integrase [Burkholderia pseudomallei]_198_228	WP_235511706.1	GenBank	198	228	RDDEESRLLQAADDSRAATLSFSITLAIET	SW	0	1	id_50_4967
BKP1_001379	WP_235511706.1 site-specific integrase [Burkholderia pseudomallei]_220_250	WP_235511706.1	GenBank	220	250	SITLAIETGMRAGEIVKLRWEQIDLPTHTI	SW	0	0	id_50_4967
BKP1_001380	WP_235511706.1 site-specific integrase [Burkholderia pseudomallei]_242_272	WP_235511706.1	GenBank	242	272	IDLPTHTIRLNLTKNGHARSVPLSERAEAA	SW	0	0	id_50_4967
BKP1_001381	WP_235511706.1 site-specific integrase [Burkholderia pseudomallei]_264_294	WP_235511706.1	GenBank	264	294	LSERAEAAIRALPRPIHGGRLTSFYDSRGL	SW	0	0	id_50_4967
BKP1_001382	WP_235511706.1 site-specific integrase [Burkholderia pseudomallei]_286_316	WP_235511706.1	GenBank	286	316	SFYDSRGLSAAFRRASERAGIVGLRFHDLR	SW	0	1	id_50_4967
BKP1_001383	WP_235511706.1 site-specific integrase [Burkholderia pseudomallei]_308_338	WP_235511706.1	GenBank	308	338	GLRFHDLRHEAASRLAPHMPASTLAKVMGW	SW	0	0	id_50_4967
BKP1_001384	WP_235511706.1 site-specific integrase [Burkholderia pseudomallei]_330_360	WP_235511706.1	GenBank	330	360	TLAKVMGWKTLQMAMRYYNPTDQELVTAVR	SW	0	0	id_50_4967
BKP1_001385	WP_235511706.1 site-specific integrase [Burkholderia pseudomallei]_345_375	WP_235511706.1	GenBank	345	375	RYYNPTDQELVTAVRKVGTQSGPDQRAAVN	SW	0	0	id_50_4967
BKP1_001386	WP_273939043.1 integrase arm-type DNA-binding domain-containing protein [Burkholderia pseudomallei]_0102	WP_273939043.1	GenBank	370	400	RIKERGNLETAMRVASASMSPTLEMRNSTA	SC	0	0	id_50_4967
BKP1_001387	WP_004198368.1 MULTISPECIES: 50S ribosomal protein L11 [Burkholderia]_000_030	WP_004198368.1	GenBank	0	30	MAKKIVGFIKLQIPAGKANPSPPVGPALGQ	SW	0	0	id_50_15000
BKP1_001388	WP_004198368.1 MULTISPECIES: 50S ribosomal protein L11 [Burkholderia]_022_052	WP_004198368.1	GenBank	22	52	PVGPALGQRGLNIMEFSKAFNAQTQGMEPG	SW	0	0	id_50_15000
BKP1_001389	WP_004198368.1 MULTISPECIES: 50S ribosomal protein L11 [Burkholderia]_044_074	WP_004198368.1	GenBank	44	74	QTQGMEPGLPVPVVITAYADKSFTFVMKTP	SW	0	0	id_50_15000
BKP1_001390	WP_004198368.1 MULTISPECIES: 50S ribosomal protein L11 [Burkholderia]_066_096	WP_004198368.1	GenBank	66	96	FTFVMKTPPATVLIKKAAKVDKGSSKPHTD	SW	0	0	id_50_15000
BKP1_001391	WP_004198368.1 MULTISPECIES: 50S ribosomal protein L11 [Burkholderia]_088_118	WP_004198368.1	GenBank	88	118	GSSKPHTDKVGKITRAQAEEIAKTKMPDLT	SW	0	0	id_50_15000
BKP1_001392	WP_004198368.1 MULTISPECIES: 50S ribosomal protein L11 [Burkholderia]_113_143	WP_004198368.1	GenBank	113	143	MPDLTAADLDAAVRTIAGSARSMGITVEGV	SW	0	0	id_50_15000
BKP1_001393	tr|A0A0E1S9D4|A0A0E1S9D4_BURPE Uncharacterized protein OS=Burkholderia pseudomallei 305 OX=425067 GN=BURPS305_1875 PE=4 SV=1_000_030	A0A0E1S9D4	Uniprot	0	30	MVRPLNDARTQRRRRTLLALAHGTMKRPAK	SW	0	0	id_50_24032
BKP1_001394	tr|A0A0E1S9D4|A0A0E1S9D4_BURPE Uncharacterized protein OS=Burkholderia pseudomallei 305 OX=425067 GN=BURPS305_1875 PE=4 SV=1_019_049	A0A0E1S9D4	Uniprot	19	49	LAHGTMKRPAKAAHAATPAAIRYRREKKKD	SW	0	0	id_50_24032
BKP1_001395	WP_004523279.1 nitroreductase family protein [Burkholderia pseudomallei]_000_030	WP_004523279.1	GenBank	0	30	METSPLKTTTPEAIPPFDPSASVEDKLRLA	SW	0	0	id_50_6535
BKP1_001396	WP_004523279.1 nitroreductase family protein [Burkholderia pseudomallei]_022_052	WP_004523279.1	GenBank	22	52	VEDKLRLAIHYAILAPSSHNTQPWRFMVGD	SW	0	0	id_50_6535
BKP1_001397	WP_004523279.1 nitroreductase family protein [Burkholderia pseudomallei]_044_074	WP_004523279.1	GenBank	44	74	PWRFMVGDGSVMLSADRLRALSVVDPYDRE	SW	0	1	id_50_6535
BKP1_001398	WP_004523279.1 nitroreductase family protein [Burkholderia pseudomallei]_066_096	WP_004523279.1	GenBank	66	96	VVDPYDRELLISSGAALLNLRVALSRFGFA	SW	0	1	id_50_6535
BKP1_001399	WP_004523279.1 nitroreductase family protein [Burkholderia pseudomallei]_088_118	WP_004523279.1	GenBank	88	118	ALSRFGFAYVIDMFPSPSDPDVIALVRLDP	SW	0	0	id_50_6535
BKP1_001400	WP_004523279.1 nitroreductase family protein [Burkholderia pseudomallei]_110_140	WP_004523279.1	GenBank	110	140	IALVRLDPHGYHDESLVPLFDAILERVTTR	SW	0	0	id_50_6535
BKP1_001401	WP_004523279.1 nitroreductase family protein [Burkholderia pseudomallei]_132_162	WP_004523279.1	GenBank	132	162	ILERVTTRTPYANEAVPSDVQRALVDAGAA	SW	0	0	id_50_6535
BKP1_001402	WP_004523279.1 nitroreductase family protein [Burkholderia pseudomallei]_154_184	WP_004523279.1	GenBank	154	184	ALVDAGAAEGAEIASVDAPHALDEIAELIA	SW	0	0	id_50_6535
BKP1_001403	WP_004523279.1 nitroreductase family protein [Burkholderia pseudomallei]_176_206	WP_004523279.1	GenBank	176	206	DEIAELIADADRLQFADPRFRRELANWVHP	SW	0	0	id_50_6535
BKP1_001404	WP_004523279.1 nitroreductase family protein [Burkholderia pseudomallei]_198_228	WP_004523279.1	GenBank	198	228	ELANWVHPRRHDDGMPAFAAGVPALLDFAT	SW	0	0	id_50_6535
BKP1_001405	WP_004523279.1 nitroreductase family protein [Burkholderia pseudomallei]_220_250	WP_004523279.1	GenBank	220	250	PALLDFATPVVASAIRTFDLGGGLAAMHHK	SW	0	0	id_50_6535
BKP1_001406	WP_004523279.1 nitroreductase family protein [Burkholderia pseudomallei]_242_272	WP_004523279.1	GenBank	242	272	GLAAMHHKLVDGSPLIVGISTASDDRDAWV	SW	0	0	id_50_6535
BKP1_001407	WP_004523279.1 nitroreductase family protein [Burkholderia pseudomallei]_264_294	WP_004523279.1	GenBank	264	294	SDDRDAWVAAGQALERVLLVAAAAGLTASY	SW	0	0	id_50_6535
BKP1_001408	WP_004523279.1 nitroreductase family protein [Burkholderia pseudomallei]_286_316	WP_004523279.1	GenBank	286	316	AAGLTASYLNQPIEIDALRERLRPLLHVDA	SW	0	0	id_50_6535
BKP1_001409	WP_004523279.1 nitroreductase family protein [Burkholderia pseudomallei]_313_343	WP_004523279.1	GenBank	313	343	VDAHPQLLLRIGRGPVVAHAPRRPLMDVVS	SW	0	0	id_50_6535
BKP1_001410	WP_172846795.1 nitroreductase family protein [Burkholderia pseudomallei]_0142	WP_172846795.1	GenBank	2	32	TSPLKTTTPEAIPPFNPSASVEDKLRLAIH	SC	0	0	id_50_6535
BKP1_001411	WP_038791658.1 nitroreductase family protein [Burkholderia pseudomallei]_0149	WP_038791658.1	GenBank	293	323	YLNQPIEIDVLRERLRPLLHVDAHPQLLLR	SC	0	0	id_50_6535
BKP1_001412	WP_122651670.1 nitroreductase family protein [Burkholderia pseudomallei]_0141	WP_122651670.1	GenBank	86	116	RVALSRFGLAYVIDMFPSPSDPDVIALVRL	SC	0	0	id_50_6535
BKP1_001413	WP_236702761.1 hypothetical protein [Burkholderia pseudomallei]_000_030	WP_236702761.1	GenBank	0	30	METWPRAVRFAMRRAPPADEWVEWVELNES	SW	0	0	id_50_17722
BKP1_001414	WP_236702761.1 hypothetical protein [Burkholderia pseudomallei]_022_052	WP_236702761.1	GenBank	22	52	EWVELNESRRPVGSTDRTAPARMHSIIVAD	SW	0	0	id_50_17722
BKP1_001415	WP_236702761.1 hypothetical protein [Burkholderia pseudomallei]_044_074	WP_236702761.1	GenBank	44	74	MHSIIVADGNASAAHPDRRTRARTGRHVLR	SW	0	1	id_50_17722
BKP1_001416	WP_236702761.1 hypothetical protein [Burkholderia pseudomallei]_066_096	WP_236702761.1	GenBank	66	96	RTGRHVLRACAPSGKRMRTRGIPGRDCNRR	SW	2	2	id_50_17722
BKP1_001417	WP_236702761.1 hypothetical protein [Burkholderia pseudomallei]_075_105	WP_236702761.1	GenBank	75	105	CAPSGKRMRTRGIPGRDCNRREREPPVEGP	SW	2	2	id_50_17722
BKP1_001418	WP_080011472.1 hypothetical protein [Burkholderia pseudomallei]_0024	WP_080011472.1	GenBank	11	41	DEWVEWVEWVELNESRRPAGSTDRTAPART	SC	0	0	id_50_17722
BKP1_001419	WP_080293822.1 hypothetical protein [Burkholderia pseudomallei]_0017	WP_080293822.1	GenBank	0	30	MRFAMRRAPPADEWVEWVELKNESRRPVGS	SC	0	0	id_50_17722
BKP1_001420	WP_004524586.1 MULTISPECIES: tRNA uridine-5-carboxymethylaminomethyl(34) synthesis GTPase MnmE [Burkholderia]_000_030	WP_004524586.1	GenBank	0	30	MLATDSDPIVAIATASGRGGIGVVRLSLGR	SW	0	0	id_50_3784
BKP1_001421	WP_004524586.1 MULTISPECIES: tRNA uridine-5-carboxymethylaminomethyl(34) synthesis GTPase MnmE [Burkholderia]_022_052	WP_004524586.1	GenBank	22	52	VVRLSLGRAGEAAARALSDALSGARLMPRH	SW	0	1	id_50_3784
BKP1_001422	WP_004524586.1 MULTISPECIES: tRNA uridine-5-carboxymethylaminomethyl(34) synthesis GTPase MnmE [Burkholderia]_044_074	WP_004524586.1	GenBank	44	74	GARLMPRHASYVPFLDGAGEPLDRGIALYF	SW	0	0	id_50_3784
BKP1_001423	WP_004524586.1 MULTISPECIES: tRNA uridine-5-carboxymethylaminomethyl(34) synthesis GTPase MnmE [Burkholderia]_066_096	WP_004524586.1	GenBank	66	96	DRGIALYFPAPHSYTGEHVIELQGHGGPIV	SW	0	0	id_50_3784
BKP1_001424	WP_004524586.1 MULTISPECIES: tRNA uridine-5-carboxymethylaminomethyl(34) synthesis GTPase MnmE [Burkholderia]_088_118	WP_004524586.1	GenBank	88	118	QGHGGPIVLQLLLQRSLDAGRAHGLRLAEP	SW	0	0	id_50_3784
BKP1_001425	WP_004524586.1 MULTISPECIES: tRNA uridine-5-carboxymethylaminomethyl(34) synthesis GTPase MnmE [Burkholderia]_110_140	WP_004524586.1	GenBank	110	140	HGLRLAEPGEFTRRAFLNDKLDLAQAEAVA	SW	0	0	id_50_3784
BKP1_001426	WP_004524586.1 MULTISPECIES: tRNA uridine-5-carboxymethylaminomethyl(34) synthesis GTPase MnmE [Burkholderia]_132_162	WP_004524586.1	GenBank	132	162	LAQAEAVADLIEASTEAAARSAGRSLDGAF	SW	0	0	id_50_3784
BKP1_001427	WP_004524586.1 MULTISPECIES: tRNA uridine-5-carboxymethylaminomethyl(34) synthesis GTPase MnmE [Burkholderia]_154_184	WP_004524586.1	GenBank	154	184	GRSLDGAFSRDIHALVDDVIALRMLVEATL	SW	0	0	id_50_3784
BKP1_001428	WP_004524586.1 MULTISPECIES: tRNA uridine-5-carboxymethylaminomethyl(34) synthesis GTPase MnmE [Burkholderia]_176_206	WP_004524586.1	GenBank	176	206	RMLVEATLDFPEEEIDFLEAADARGKLAHI	SW	0	0	id_50_3784
BKP1_001429	WP_004524586.1 MULTISPECIES: tRNA uridine-5-carboxymethylaminomethyl(34) synthesis GTPase MnmE [Burkholderia]_198_228	WP_004524586.1	GenBank	198	228	ARGKLAHIRERLAHVLGDARQGALLREGLS	SW	0	0	id_50_3784
BKP1_001430	WP_004524586.1 MULTISPECIES: tRNA uridine-5-carboxymethylaminomethyl(34) synthesis GTPase MnmE [Burkholderia]_220_250	WP_004524586.1	GenBank	220	250	ALLREGLSVVLAGQPNVGKSSLLNALAGAE	SW	0	0	id_50_3784
BKP1_001431	WP_004524586.1 MULTISPECIES: tRNA uridine-5-carboxymethylaminomethyl(34) synthesis GTPase MnmE [Burkholderia]_242_272	WP_004524586.1	GenBank	242	272	LNALAGAELAIVTPIAGTTRDKVAQTIQIE	SW	0	0	id_50_3784
BKP1_001432	WP_004524586.1 MULTISPECIES: tRNA uridine-5-carboxymethylaminomethyl(34) synthesis GTPase MnmE [Burkholderia]_264_294	WP_004524586.1	GenBank	264	294	VAQTIQIEGIPLHIIDTAGLRETEDEVEKI	SW	0	0	id_50_3784
BKP1_001433	WP_004524586.1 MULTISPECIES: tRNA uridine-5-carboxymethylaminomethyl(34) synthesis GTPase MnmE [Burkholderia]_286_316	WP_004524586.1	GenBank	286	316	TEDEVEKIGIARTWGEIERADVVLHLLDAR	SW	0	0	id_50_3784
BKP1_001434	WP_004524586.1 MULTISPECIES: tRNA uridine-5-carboxymethylaminomethyl(34) synthesis GTPase MnmE [Burkholderia]_308_338	WP_004524586.1	GenBank	308	338	VLHLLDARSGLGPGDEAIAARFPDGVPVVR	SW	0	0	id_50_3784
BKP1_001435	WP_004524586.1 MULTISPECIES: tRNA uridine-5-carboxymethylaminomethyl(34) synthesis GTPase MnmE [Burkholderia]_330_360	WP_004524586.1	GenBank	330	360	PDGVPVVRVLNKTDLTGAPASVTRTGGGAA	SW	0	0	id_50_3784
BKP1_001436	WP_004524586.1 MULTISPECIES: tRNA uridine-5-carboxymethylaminomethyl(34) synthesis GTPase MnmE [Burkholderia]_352_382	WP_004524586.1	GenBank	352	382	TRTGGGAARADVSEVRLSAKRGDGIDLLRG	SW	0	1	id_50_3784
BKP1_001437	WP_004524586.1 MULTISPECIES: tRNA uridine-5-carboxymethylaminomethyl(34) synthesis GTPase MnmE [Burkholderia]_374_404	WP_004524586.1	GenBank	374	404	DGIDLLRGELLRIAGWQAGAESVYLARERH	SW	0	0	id_50_3784
BKP1_001438	WP_004524586.1 MULTISPECIES: tRNA uridine-5-carboxymethylaminomethyl(34) synthesis GTPase MnmE [Burkholderia]_396_426	WP_004524586.1	GenBank	396	426	VYLARERHLIALRAAQAHLARAAEHAEQNA	SW	0	0	id_50_3784
BKP1_001439	WP_004524586.1 MULTISPECIES: tRNA uridine-5-carboxymethylaminomethyl(34) synthesis GTPase MnmE [Burkholderia]_418_448	WP_004524586.1	GenBank	418	448	AEHAEQNAQALDLFAEELRLAQERLNSITG	SW	0	0	id_50_3784
BKP1_001440	WP_004524586.1 MULTISPECIES: tRNA uridine-5-carboxymethylaminomethyl(34) synthesis GTPase MnmE [Burkholderia]_437_467	WP_004524586.1	GenBank	437	467	LAQERLNSITGEFTSDDLLGVIFSRFSIGK	SW	0	1	id_50_3784
BKP1_001441	tr|A0A2K9DD65|A0A2K9DD65_BURPE Acetate permease OS=Burkholderia pseudomallei OX=28450 GN=CXQ84_20880 PE=4 SV=1_000_030	A0A2K9DD65	Uniprot	0	30	MSILAPKRRSAEAPKRRSAEAPKRRSAEAP	SW	0	0	id_50_18246
BKP1_001442	tr|A0A2K9DD65|A0A2K9DD65_BURPE Acetate permease OS=Burkholderia pseudomallei OX=28450 GN=CXQ84_20880 PE=4 SV=1_071_101	A0A2K9DD65	Uniprot	71	101	RRNAEAPKHRSTEAPNQACSARPHCAHPPA	SW	2	2	id_50_18246
BKP1_001443	WP_158332095.1 acetate permease [Burkholderia pseudomallei]_0016	WP_158332095.1	GenBank	54	84	PKRRTKHAPHAPIARTRPREPDPRRATISR	SC	0	0	id_50_18246
BKP1_001444	WP_157131241.1 acetate permease [Burkholderia pseudomallei]_0000	WP_157131241.1	GenBank	3	33	GRRRVVSILAPKRRNAETPKRRNAETPKRR	SC	0	0	id_50_18246
BKP1_001445	WP_195759683.1 acetate permease [Burkholderia pseudomallei]_0014	WP_195759683.1	GenBank	32	62	RRSAEAPKRRNAEAPKRRSTEAPKRRTKHA	SC	0	0	id_50_18246
BKP1_001446	WP_256729949.1 hypothetical protein [Burkholderia pseudomallei]_0002	WP_256729949.1	GenBank	19	49	ETPKRRSAEAPKRRSAEAPKRRSTEVPNQA	SC	0	0	id_50_18246
BKP1_001447	WP_217700576.1 acetate permease, partial [Burkholderia pseudomallei]_0005	WP_217700576.1	GenBank	35	65	RRSAEALKRRSAETPKRRNAETPKHRSTEA	SC	0	0	id_50_18246
BKP1_001448	WP_151283646.1 acetate permease, partial [Burkholderia pseudomallei]_0004	WP_151283646.1	GenBank	43	73	PKHRSAEAPKRRSAEAPKRRSTEAPKHRST	SC	0	0	id_50_18246
BKP1_001449	WP_157131241.1 acetate permease [Burkholderia pseudomallei]_0040	WP_157131241.1	GenBank	57	87	SAEAPKRRSAEALKYRTKHAPHAPIARTRP	SC	0	0	id_50_18246
BKP1_001450	tr|Q3JIX5|Q3JIX5_BURP1 Aromatic-amino-acid aminotransferase OS=Burkholderia pseudomallei (strain 1710b) OX=320372 GN=tyrB2 PE=3 SV=1_000_030	Q3JIX5	Uniprot	0	30	MSNMFEHLPAHPGDPILSLFQAFQRDPEPR	SW	0	0	id_50_4217
BKP1_001451	tr|Q3JIX5|Q3JIX5_BURP1 Aromatic-amino-acid aminotransferase OS=Burkholderia pseudomallei (strain 1710b) OX=320372 GN=tyrB2 PE=3 SV=1_022_052	Q3JIX5	Uniprot	22	52	FQRDPEPRKVNLSIGLYYDENGAVPVLDSV	SW	0	0	id_50_4217
BKP1_001452	tr|Q3JIX5|Q3JIX5_BURP1 Aromatic-amino-acid aminotransferase OS=Burkholderia pseudomallei (strain 1710b) OX=320372 GN=tyrB2 PE=3 SV=1_044_074	Q3JIX5	Uniprot	44	74	AVPVLDSVRAAAARLAARDDAHTYLPMEGM	SW	0	0	id_50_4217
BKP1_001453	tr|Q3JIX5|Q3JIX5_BURP1 Aromatic-amino-acid aminotransferase OS=Burkholderia pseudomallei (strain 1710b) OX=320372 GN=tyrB2 PE=3 SV=1_066_096	Q3JIX5	Uniprot	66	96	TYLPMEGMADYRRALQALVFGANSPALREQ	SW	0	0	id_50_4217
BKP1_001454	tr|Q3JIX5|Q3JIX5_BURP1 Aromatic-amino-acid aminotransferase OS=Burkholderia pseudomallei (strain 1710b) OX=320372 GN=tyrB2 PE=3 SV=1_110_140	Q3JIX5	Uniprot	110	140	RLGADLLKRYFPDSAIWIGDPTWDNHRVLF	SW	0	0	id_50_4217
BKP1_001455	tr|Q3JIX5|Q3JIX5_BURP1 Aromatic-amino-acid aminotransferase OS=Burkholderia pseudomallei (strain 1710b) OX=320372 GN=tyrB2 PE=3 SV=1_132_162	Q3JIX5	Uniprot	132	162	WDNHRVLFAAAGLDVHTYPYYDAATNGVRF	SW	0	0	id_50_4217
BKP1_001456	tr|Q3JIX5|Q3JIX5_BURP1 Aromatic-amino-acid aminotransferase OS=Burkholderia pseudomallei (strain 1710b) OX=320372 GN=tyrB2 PE=3 SV=1_154_184	Q3JIX5	Uniprot	154	184	AATNGVRFDAMMATLDTLPARAIVLLQPCC	SW	2	2	id_50_4217
BKP1_001457	tr|Q3JIX5|Q3JIX5_BURP1 Aromatic-amino-acid aminotransferase OS=Burkholderia pseudomallei (strain 1710b) OX=320372 GN=tyrB2 PE=3 SV=1_176_206	Q3JIX5	Uniprot	176	206	IVLLQPCCHNPTGIDLSREQWRELAALCER	SW	3	3	id_50_4217
BKP1_001458	tr|Q3JIX5|Q3JIX5_BURP1 Aromatic-amino-acid aminotransferase OS=Burkholderia pseudomallei (strain 1710b) OX=320372 GN=tyrB2 PE=3 SV=1_198_228	Q3JIX5	Uniprot	198	228	ELAALSERRALIAFLDIAYQGFGDGLDDDA	SW	0	0	id_50_4217
BKP1_001459	tr|Q3JIX5|Q3JIX5_BURP1 Aromatic-amino-acid aminotransferase OS=Burkholderia pseudomallei (strain 1710b) OX=320372 GN=tyrB2 PE=3 SV=1_220_250	Q3JIX5	Uniprot	220	250	GDGLDDDAWPIRAMADAGLPVFVSHSFSKN	SW	0	0	id_50_4217
BKP1_001460	tr|Q3JIX5|Q3JIX5_BURP1 Aromatic-amino-acid aminotransferase OS=Burkholderia pseudomallei (strain 1710b) OX=320372 GN=tyrB2 PE=3 SV=1_242_272	Q3JIX5	Uniprot	242	272	VSHSFSKNFSLYGERCGGLSIACANEREAA	SW	2	2	id_50_4217
BKP1_001461	tr|Q3JIX5|Q3JIX5_BURP1 Aromatic-amino-acid aminotransferase OS=Burkholderia pseudomallei (strain 1710b) OX=320372 GN=tyrB2 PE=3 SV=1_264_294	Q3JIX5	Uniprot	264	294	SANEREAARVLSQIQAGVRRVYSSPPLHGA	SW	0	1	id_50_4217
BKP1_001462	tr|Q3JIX5|Q3JIX5_BURP1 Aromatic-amino-acid aminotransferase OS=Burkholderia pseudomallei (strain 1710b) OX=320372 GN=tyrB2 PE=3 SV=1_286_316	Q3JIX5	Uniprot	286	316	SSPPLHGARLVSTVLNDPALARQWDRDVAA	SW	0	0	id_50_4217
BKP1_001463	tr|Q3JIX5|Q3JIX5_BURP1 Aromatic-amino-acid aminotransferase OS=Burkholderia pseudomallei (strain 1710b) OX=320372 GN=tyrB2 PE=3 SV=1_308_338	Q3JIX5	Uniprot	308	338	QWDRDVAAMRARIKRMRTALAARLAARVPG	SW	0	0	id_50_4217
BKP1_001464	tr|Q3JIX5|Q3JIX5_BURP1 Aromatic-amino-acid aminotransferase OS=Burkholderia pseudomallei (strain 1710b) OX=320372 GN=tyrB2 PE=3 SV=1_330_360	Q3JIX5	Uniprot	330	360	RLAARVPGASFDYLVEQRGMFSYTGLAPHE	SW	0	0	id_50_4217
BKP1_001465	tr|Q3JIX5|Q3JIX5_BURP1 Aromatic-amino-acid aminotransferase OS=Burkholderia pseudomallei (strain 1710b) OX=320372 GN=tyrB2 PE=3 SV=1_352_382	Q3JIX5	Uniprot	352	382	YTGLAPHEVDALREHDGVYLLRSGRASIAG	SW	0	1	id_50_4217
BKP1_001466	tr|Q3JIX5|Q3JIX5_BURP1 Aromatic-amino-acid aminotransferase OS=Burkholderia pseudomallei (strain 1710b) OX=320372 GN=tyrB2 PE=3 SV=1_378_408	Q3JIX5	Uniprot	378	408	SIAGLSDANVDHVANAIAAVLKARRARAAA	SW	0	1	id_50_4217
BKP1_001467	tr|A8EKU7|A8EKU7_BURPE Aminotransferase OS=Burkholderia pseudomallei 406e OX=360118 GN=tyrB PE=3 SV=1_0170	A8EKU7	Uniprot	45	75	RTRKVNLSIGIYFDDDGRIPVMGAVREAEA	SC	0	0	id_50_4217
BKP1_001468	tr|A8EKU7|A8EKU7_BURPE Aminotransferase OS=Burkholderia pseudomallei 406e OX=360118 GN=tyrB PE=3 SV=1_0232	A8EKU7	Uniprot	22	52	FEHIDAYPGDPILTLNENFQQDPRTRKVNL	SC	0	0	id_50_4217
BKP1_001469	tr|A8EKU7|A8EKU7_BURPE Aminotransferase OS=Burkholderia pseudomallei 406e OX=360118 GN=tyrB PE=3 SV=1_0093	A8EKU7	Uniprot	219	249	DVLQARELLPFVDMAYQGFGAGLAADAFAI	SC	0	0	id_50_4217
BKP1_001470	tr|A8EKU7|A8EKU7_BURPE Aminotransferase OS=Burkholderia pseudomallei 406e OX=360118 GN=tyrB PE=3 SV=1_0103	A8EKU7	Uniprot	67	97	GAVREAEAIVQRESGPKPYLPMTGLAAYRD	SC	0	0	id_50_4217
BKP1_001471	tr|A8EKU7|A8EKU7_BURPE Aminotransferase OS=Burkholderia pseudomallei 406e OX=360118 GN=tyrB PE=3 SV=1_0043	A8EKU7	Uniprot	241	271	LAADAFAIRELARRGMPAFVANSFSKNFSL	SC	0	0	id_50_4217
BKP1_001472	tr|A8EKU7|A8EKU7_BURPE Aminotransferase OS=Burkholderia pseudomallei 406e OX=360118 GN=tyrB PE=3 SV=1_0027	A8EKU7	Uniprot	151	181	ENHRFIFERAGFTVNTYPYYDEATGGLKFD	SC	0	0	id_50_4217
BKP1_001473	tr|A8EKU7|A8EKU7_BURPE Aminotransferase OS=Burkholderia pseudomallei 406e OX=360118 GN=tyrB PE=3 SV=1_0007	A8EKU7	Uniprot	202	232	HNPTGVDLDDAQWLKLIDVLQARELLPFVD	SC	0	0	id_50_4217
BKP1_001474	WP_038756146.1 aspartate/tyrosine/aromatic aminotransferase [Burkholderia pseudomallei]_0165	WP_038756146.1	GenBank	315	345	RRIAKMRSAIHDGLRAHVPAEALTHYVKQR	SC	0	0	id_50_4217
BKP1_001475	WP_050040821.1 aspartate/tyrosine/aromatic aminotransferase [Burkholderia pseudomallei]_0351	WP_050040821.1	GenBank	68	98	TGLAAYRDAVQAVVFGEGSGARAAGRIATV	SC	0	0	id_50_4217
BKP1_001476	WP_076912288.1 aspartate/tyrosine/aromatic aminotransferase [Burkholderia pseudomallei]_0329	WP_076912288.1	GenBank	100	130	LGGSGALKVGADFIKRYFPHAQVWISNPSW	SC	0	0	id_50_4217
BKP1_001477	WP_122632725.1 aspartate/tyrosine/aromatic aminotransferase [Burkholderia pseudomallei]_0073	WP_122632725.1	GenBank	231	261	ARRGIPAFVANSFSKNFSLYGERVGALSVI	SC	0	0	id_50_4217
BKP1_001478	WP_038741329.1 aspartate/tyrosine/aromatic aminotransferase [Burkholderia pseudomallei]_0372	WP_038741329.1	GenBank	79	109	ALVFGANSLALREQRIATVQTVGGSGALHL	SC	0	0	id_50_4217
BKP1_001479	WP_160457559.1 aspartate/tyrosine/aromatic aminotransferase [Burkholderia pseudomallei]_0270	WP_160457559.1	GenBank	117	147	FPDSAIWIGDPTWDNHHVLFAAAGLDVHTY	SC	0	0	id_50_4217
BKP1_001480	WP_085547413.1 aspartate/tyrosine/aromatic aminotransferase [Burkholderia pseudomallei]_0111	WP_085547413.1	GenBank	147	177	PYYDAATNSVRFDAMMAMLDTLPARAIVLL	SC	0	0	id_50_4217
BKP1_001481	tr|A0A0E1TPX9|A0A0E1TPX9_BURPE Aromatic-amino-aminotransferase OS=Burkholderia pseudomallei 576 OX=557724 GN=tyrB_1 PE=3 SV=1_0349	A0A0E1TPX9	Uniprot	339	369	SFDYLVEQRGMFSYTGFAPHEVDALREHDG	SC	0	0	id_50_4217
BKP1_001482	tr|A8EKU7|A8EKU7_BURPE Aminotransferase OS=Burkholderia pseudomallei 406e OX=360118 GN=tyrB PE=3 SV=1_0341	A8EKU7	Uniprot	0	30	MHSAAAYRPVDSVFSFIVETAMFEHIDAYP	SC	0	0	id_50_4217
BKP1_001483	tr|Q3JX96|Q3JX96_BURP1 DUF484 family protein OS=Burkholderia pseudomallei (strain 1710b) OX=320372 GN=BURPS1710b_0393 PE=4 SV=1_000_030	Q3JX96	Uniprot	0	30	MPAAYNSAHETLVHQDARRGQRLRRARRLH	SW	0	0	id_50_2674
BKP1_001484	tr|Q3JX96|Q3JX96_BURP1 DUF484 family protein OS=Burkholderia pseudomallei (strain 1710b) OX=320372 GN=BURPS1710b_0393 PE=4 SV=1_022_052	Q3JX96	Uniprot	22	52	LRRARRLHPRAAPAHRRAGARARRPPLRDR	SW	0	0	id_50_2674
BKP1_001485	tr|Q3JX96|Q3JX96_BURP1 DUF484 family protein OS=Burkholderia pseudomallei (strain 1710b) OX=320372 GN=BURPS1710b_0393 PE=4 SV=1_044_074	Q3JX96	Uniprot	44	74	RRPPLRDRRRSVAARRKADRRRRRFQIPDL	SW	0	0	id_50_2674
BKP1_001486	tr|Q3JX96|Q3JX96_BURP1 DUF484 family protein OS=Burkholderia pseudomallei (strain 1710b) OX=320372 GN=BURPS1710b_0393 PE=4 SV=1_066_096	Q3JX96	Uniprot	66	96	RRFQIPDLQLRRRRSRALRQRRALLRQVRP	SW	0	0	id_50_2674
BKP1_001487	tr|Q3JX96|Q3JX96_BURP1 DUF484 family protein OS=Burkholderia pseudomallei (strain 1710b) OX=320372 GN=BURPS1710b_0393 PE=4 SV=1_088_118	Q3JX96	Uniprot	88	118	ALLRQVRPRPRAHRQGERARRGEARRDHAD	SW	0	0	id_50_2674
BKP1_001488	tr|Q3JX96|Q3JX96_BURP1 DUF484 family protein OS=Burkholderia pseudomallei (strain 1710b) OX=320372 GN=BURPS1710b_0393 PE=4 SV=1_110_140	Q3JX96	Uniprot	110	140	EARRDHADDAGQRRGRRRHGRARVRAGARA	SW	0	0	id_50_2674
BKP1_001489	tr|Q3JX96|Q3JX96_BURP1 DUF484 family protein OS=Burkholderia pseudomallei (strain 1710b) OX=320372 GN=BURPS1710b_0393 PE=4 SV=1_132_162	Q3JX96	Uniprot	132	162	RVRAGARAVRRERPRRPPRGRRHALAAARE	SW	0	0	id_50_2674
BKP1_001490	tr|Q3JX96|Q3JX96_BURP1 DUF484 family protein OS=Burkholderia pseudomallei (strain 1710b) OX=320372 GN=BURPS1710b_0393 PE=4 SV=1_154_184	Q3JX96	Uniprot	154	184	HALAAARERRDALDLGRVDGQSARGADRRR	SW	0	0	id_50_2674
BKP1_001491	tr|Q3JX96|Q3JX96_BURP1 DUF484 family protein OS=Burkholderia pseudomallei (strain 1710b) OX=320372 GN=BURPS1710b_0393 PE=4 SV=1_176_206	Q3JX96	Uniprot	176	206	ARGADRRRRRGVRGARRRAGDRARSAFPAA	SW	0	0	id_50_2674
BKP1_001492	tr|Q3JX96|Q3JX96_BURP1 DUF484 family protein OS=Burkholderia pseudomallei (strain 1710b) OX=320372 GN=BURPS1710b_0393 PE=4 SV=1_198_228	Q3JX96	Uniprot	198	228	ARSAFPAARERGLHADRVASRSEPARLRAR	SW	0	0	id_50_2674
BKP1_001493	tr|Q3JX96|Q3JX96_BURP1 DUF484 family protein OS=Burkholderia pseudomallei (strain 1710b) OX=320372 GN=BURPS1710b_0393 PE=4 SV=1_220_250	Q3JX96	Uniprot	220	250	EPARLRARRGRNARVRHGRVRGRRGRHPAR	SW	0	0	id_50_2674
BKP1_001494	tr|Q3JX96|Q3JX96_BURP1 DUF484 family protein OS=Burkholderia pseudomallei (strain 1710b) OX=320372 GN=BURPS1710b_0393 PE=4 SV=1_242_272	Q3JX96	Uniprot	242	272	RRGRHPARATRFARHGPYARRHADDLVERR	SW	0	0	id_50_2674
BKP1_001495	tr|Q3JX96|Q3JX96_BURP1 DUF484 family protein OS=Burkholderia pseudomallei (strain 1710b) OX=320372 GN=BURPS1710b_0393 PE=4 SV=1_264_294	Q3JX96	Uniprot	264	294	ADDLVERRVRRARAAHDGRPRDHRLRRRDR	SW	0	0	id_50_2674
BKP1_001496	tr|Q3JX96|Q3JX96_BURP1 DUF484 family protein OS=Burkholderia pseudomallei (strain 1710b) OX=320372 GN=BURPS1710b_0393 PE=4 SV=1_286_316	Q3JX96	Uniprot	286	316	HRLRRRDRAARLTFNSQTFHLPKPERSAMN	SW	0	0	id_50_2674
BKP1_001497	tr|Q3JX96|Q3JX96_BURP1 DUF484 family protein OS=Burkholderia pseudomallei (strain 1710b) OX=320372 GN=BURPS1710b_0393 PE=4 SV=1_308_338	Q3JX96	Uniprot	308	338	KPERSAMNDREVADYLLANPEFFAQHAELL	SW	0	0	id_50_2674
BKP1_001498	tr|Q3JX96|Q3JX96_BURP1 DUF484 family protein OS=Burkholderia pseudomallei (strain 1710b) OX=320372 GN=BURPS1710b_0393 PE=4 SV=1_330_360	Q3JX96	Uniprot	330	360	FAQHAELLATIKLANPHGKAAVSLQERQME	SW	0	0	id_50_2674
BKP1_001499	tr|Q3JX96|Q3JX96_BURP1 DUF484 family protein OS=Burkholderia pseudomallei (strain 1710b) OX=320372 GN=BURPS1710b_0393 PE=4 SV=1_352_382	Q3JX96	Uniprot	352	382	SLQERQMEMLREKNKHLERRLAELLRYGHE	SW	0	0	id_50_2674
BKP1_001500	tr|Q3JX96|Q3JX96_BURP1 DUF484 family protein OS=Burkholderia pseudomallei (strain 1710b) OX=320372 GN=BURPS1710b_0393 PE=4 SV=1_374_404	Q3JX96	Uniprot	374	404	ELLRYGHENDGLAAKFNRWTARVIAERDPY	SW	0	0	id_50_2674
BKP1_001501	tr|Q3JX96|Q3JX96_BURP1 DUF484 family protein OS=Burkholderia pseudomallei (strain 1710b) OX=320372 GN=BURPS1710b_0393 PE=4 SV=1_396_426	Q3JX96	Uniprot	396	426	VIAERDPYALPRAIAGGLADVFDVPQTALR	SW	0	0	id_50_2674
BKP1_001502	tr|Q3JX96|Q3JX96_BURP1 DUF484 family protein OS=Burkholderia pseudomallei (strain 1710b) OX=320372 GN=BURPS1710b_0393 PE=4 SV=1_418_448	Q3JX96	Uniprot	418	448	DVPQTALRLWDVAETYAQADFARNVGEEVR	SW	0	0	id_50_2674
BKP1_001503	tr|Q3JX96|Q3JX96_BURP1 DUF484 family protein OS=Burkholderia pseudomallei (strain 1710b) OX=320372 GN=BURPS1710b_0393 PE=4 SV=1_440_470	Q3JX96	Uniprot	440	470	RNVGEEVRLFTNSLATPYSGANTGFEAAQW	SW	0	1	id_50_2674
BKP1_001504	tr|Q3JX96|Q3JX96_BURP1 DUF484 family protein OS=Burkholderia pseudomallei (strain 1710b) OX=320372 GN=BURPS1710b_0393 PE=4 SV=1_462_492	Q3JX96	Uniprot	462	492	TGFEAAQWLTPVAAPPAADDGEAPAASGAA	SW	0	0	id_50_2674
BKP1_001505	tr|Q3JX96|Q3JX96_BURP1 DUF484 family protein OS=Burkholderia pseudomallei (strain 1710b) OX=320372 GN=BURPS1710b_0393 PE=4 SV=1_484_514	Q3JX96	Uniprot	484	514	APAASGAAESVALIALRASAEGEGAGAFGL	SW	0	0	id_50_2674
BKP1_001506	tr|Q3JX96|Q3JX96_BURP1 DUF484 family protein OS=Burkholderia pseudomallei (strain 1710b) OX=320372 GN=BURPS1710b_0393 PE=4 SV=1_506_536	Q3JX96	Uniprot	506	536	EGAGAFGLLVLGSPDPRRFHDGMGTDFLTQ	SW	0	0	id_50_2674
BKP1_001507	tr|Q3JX96|Q3JX96_BURP1 DUF484 family protein OS=Burkholderia pseudomallei (strain 1710b) OX=320372 GN=BURPS1710b_0393 PE=4 SV=1_521_551	Q3JX96	Uniprot	521	551	PRRFHDGMGTDFLTQIGTLASAALTRLLPH	SW	0	0	id_50_2674
BKP1_001508	WP_200524641.1 hypothetical protein [Burkholderia pseudomallei]_000_030	WP_200524641.1	GenBank	0	30	MSRRNWKRIQPHSLRHALELSKEHARERRN	SW	0	1	id_50_13966
BKP1_001509	WP_200524641.1 hypothetical protein [Burkholderia pseudomallei]_022_052	WP_200524641.1	GenBank	22	52	EHARERRNLSVERISEHMGLADHWTLYKWF	SW	0	0	id_50_13966
BKP1_001510	WP_200524641.1 hypothetical protein [Burkholderia pseudomallei]_044_074	WP_200524641.1	GenBank	44	74	HWTLYKWFQSGRMPISLIRPFEDASGADFV	SW	0	1	id_50_13966
BKP1_001511	WP_200524641.1 hypothetical protein [Burkholderia pseudomallei]_066_096	WP_200524641.1	GenBank	66	96	DASGADFVTRWVAASAGRLIIDIPTGRDAT	SW	0	1	id_50_13966
BKP1_001512	WP_200524641.1 hypothetical protein [Burkholderia pseudomallei]_088_118	WP_200524641.1	GenBank	88	118	IPTGRDATAEDMQVLQRTLNAAVGQLLDFY	SW	0	0	id_50_13966
BKP1_001513	WP_200524641.1 hypothetical protein [Burkholderia pseudomallei]_110_140	WP_200524641.1	GenBank	110	140	VGQLLDFYAGSANADETIATIQQAMEGLAW	SW	0	0	id_50_13966
BKP1_001514	WP_200524641.1 hypothetical protein [Burkholderia pseudomallei]_129_159	WP_200524641.1	GenBank	129	159	TIQQAMEGLAWHRGNVERHVQPELDLGAAE	SW	0	0	id_50_13966
BKP1_001515	WP_085722591.1 hypothetical protein [Burkholderia pseudomallei]_0026	WP_085722591.1	GenBank	25	55	RERRNLSVERIAEHMGLADHWTLYKWFQSG	SC	0	0	id_50_13966
BKP1_001516	WP_179105251.1 hypothetical protein [Burkholderia pseudomallei]_000_030	WP_179105251.1	GenBank	0	30	MIAWKTSMWRRRMMGRERDGSSSVGHYRVS	SW	0	1	id_50_11341
BKP1_001517	WP_179105251.1 hypothetical protein [Burkholderia pseudomallei]_022_052	WP_179105251.1	GenBank	22	52	CVGHYRVSRPIAILCGPEGGWEAAGAAGAP	SW	2	2	id_50_11341
BKP1_001518	WP_179105251.1 hypothetical protein [Burkholderia pseudomallei]_044_074	WP_179105251.1	GenBank	44	74	AAGAAGAPFGGGPRDRIGARGAERASASTK	SW	0	0	id_50_11341
BKP1_001519	WP_179105251.1 hypothetical protein [Burkholderia pseudomallei]_066_096	WP_179105251.1	GenBank	66	96	ERASASTKRAEEASRRSVSKKRAEEASGKS	SW	0	1	id_50_11341
BKP1_001520	WP_179105251.1 hypothetical protein [Burkholderia pseudomallei]_088_118	WP_179105251.1	GenBank	88	118	AEEASGKSEREKWTGKASRRSGAWTIRAAG	SW	0	1	id_50_11341
BKP1_001521	WP_179105251.1 hypothetical protein [Burkholderia pseudomallei]_110_140	WP_179105251.1	GenBank	110	140	AWTIRAAGIGATDSTRTARQVEYRPAIADR	SW	0	0	id_50_11341
BKP1_001522	WP_179105251.1 hypothetical protein [Burkholderia pseudomallei]_132_162	WP_179105251.1	GenBank	132	162	YRPAIADRSPTDRRPARKPSVRRIDRAARA	SW	0	0	id_50_11341
BKP1_001523	WP_179105251.1 hypothetical protein [Burkholderia pseudomallei]_154_184	WP_179105251.1	GenBank	154	184	RIDRAARASRLSGAPSPNPFERARFDAGAS	SW	0	0	id_50_11341
BKP1_001524	WP_179105251.1 hypothetical protein [Burkholderia pseudomallei]_179_209	WP_179105251.1	GenBank	179	209	DAGASSPRAAAHPRWRMSAVGVEPKSSLST	SW	0	0	id_50_11341
BKP1_001525	tr|A0A7V8I2U6|A0A7V8I2U6_BURPE Uncharacterized protein OS=Burkholderia pseudomallei OX=28450 GN=DP49_1742 PE=4 SV=1_0025	A0A7V8I2U6	Uniprot	25	55	PEGGWGAASAAGAPFGGGLRDGIGARGAER	SC	0	0	id_50_11341
BKP1_001526	WP_230395767.1 hypothetical protein, partial [Burkholderia pseudomallei]_0088	WP_230395767.1	GenBank	51	81	AAHGRFDPPGSARPIRLVPRDKSNIGWQLP	SC	0	0	id_50_11341
BKP1_001527	WP_230395767.1 hypothetical protein, partial [Burkholderia pseudomallei]_0116	WP_230395767.1	GenBank	16	46	SVLKKRIEGAYRRSVPKKRAGKASGKSGPE	SC	0	0	id_50_11341
BKP1_001528	WP_230395767.1 hypothetical protein, partial [Burkholderia pseudomallei]_0068	WP_230395767.1	GenBank	65	95	IRLVPRDKSNIGWQLPTDRRPIAGRRANPR	SC	0	0	id_50_11341
BKP1_001529	WP_230395767.1 hypothetical protein, partial [Burkholderia pseudomallei]_0056	WP_230395767.1	GenBank	34	64	RAGKASGKSGPEKRRGDAAHGRFDPPGSAR	SC	0	0	id_50_11341
BKP1_001530	WP_230395767.1 hypothetical protein, partial [Burkholderia pseudomallei]_0067	WP_230395767.1	GenBank	3	33	GGEGKMGIRERRRSVLKKRIEGAYRRSVPK	SC	0	0	id_50_11341
BKP1_001531	tr|B1H413|B1H413_BURPE Uncharacterized protein OS=Burkholderia pseudomallei S13 OX=320374 GN=BURPSS13_0117 PE=4 SV=1_000_030	B1H413	Uniprot	0	30	MRVNETAKKPSSSHRATREPTANVRHSGSF	SW	0	1	id_50_10819
BKP1_001532	tr|B1H413|B1H413_BURPE Uncharacterized protein OS=Burkholderia pseudomallei S13 OX=320374 GN=BURPSS13_0117 PE=4 SV=1_022_052	B1H413	Uniprot	22	52	NVRHSGSFAQADSAMLVHPFGDGRFPAAVS	SW	0	1	id_50_10819
BKP1_001533	tr|B1H413|B1H413_BURPE Uncharacterized protein OS=Burkholderia pseudomallei S13 OX=320374 GN=BURPSS13_0117 PE=4 SV=1_044_074	B1H413	Uniprot	44	74	GRFPAAVSRRRRRCGLSRGNGAHADGMHCR	SW	2	2	id_50_10819
BKP1_001534	tr|B1H413|B1H413_BURPE Uncharacterized protein OS=Burkholderia pseudomallei S13 OX=320374 GN=BURPSS13_0117 PE=4 SV=1_066_096	B1H413	Uniprot	66	96	HADGMHCRRNPPPMRRDRPTARARACAATD	SW	2	2	id_50_10819
BKP1_001535	tr|B1H413|B1H413_BURPE Uncharacterized protein OS=Burkholderia pseudomallei S13 OX=320374 GN=BURPSS13_0117 PE=4 SV=1_088_118	B1H413	Uniprot	88	118	ARASAATDAARPNPPVAGAARDAPPPLEKA	SW	0	0	id_50_10819
BKP1_001536	tr|B1H413|B1H413_BURPE Uncharacterized protein OS=Burkholderia pseudomallei S13 OX=320374 GN=BURPSS13_0117 PE=4 SV=1_110_140	B1H413	Uniprot	110	140	APPPLEKAMTIRIEPGDKREIAETLGRYFE	SW	0	0	id_50_10819
BKP1_001537	tr|B1H413|B1H413_BURPE Uncharacterized protein OS=Burkholderia pseudomallei S13 OX=320374 GN=BURPSS13_0117 PE=4 SV=1_132_162	B1H413	Uniprot	132	162	ETLGRYFEARSIPFHIEEHPADVLHIGFHA	SW	0	0	id_50_10819
BKP1_001538	tr|B1H413|B1H413_BURPE Uncharacterized protein OS=Burkholderia pseudomallei S13 OX=320374 GN=BURPSS13_0117 PE=4 SV=1_154_184	B1H413	Uniprot	154	184	VLHIGFHADGHPAAVTVTFDEDAFAAFAQW	SW	0	0	id_50_10819
BKP1_001539	tr|B1H413|B1H413_BURPE Uncharacterized protein OS=Burkholderia pseudomallei S13 OX=320374 GN=BURPSS13_0117 PE=4 SV=1_176_206	B1H413	Uniprot	176	206	AFAAFAQWDIEQKRLALRRLADEFAEMMAQ	SW	0	0	id_50_10819
BKP1_001540	tr|B1H413|B1H413_BURPE Uncharacterized protein OS=Burkholderia pseudomallei S13 OX=320374 GN=BURPSS13_0117 PE=4 SV=1_191_221	B1H413	Uniprot	191	221	ALRRLADEFAEMMAQRSPTAHAGDLHINRF	SW	0	0	id_50_10819
BKP1_001541	tr|A3NP48|A3NP48_BURP6 DUF2218 domain-containing protein OS=Burkholderia pseudomallei (strain 668) OX=320373 GN=BURPS668_A3128 PE=4 SV=1_0110	A3NP48	Uniprot	65	95	VATDATEPTRGRRRARRAGRPPLEKAMTIR	SC	0	0	id_50_10819
BKP1_001542	tr|A8EAI0|A8EAI0_BURPE ABM domain-containing protein OS=Burkholderia pseudomallei 406e OX=360118 GN=BURPS406E_0407 PE=4 SV=1_0039	A8EAI0	Uniprot	110	140	SIPFHIEEHPADVLHIGFYADGHPAAVTVT	SC	0	0	id_50_10819
BKP1_001543	tr|A0A0E1W0I9|A0A0E1W0I9_BURPE DUF2218 domain-containing protein OS=Burkholderia pseudomallei 1710a OX=320371 GN=BURPS1710A_A2300 PE=4 SV=1_0010	A0A0E1W0I9	Uniprot	60	90	DAARPNPPVASTARDAPPPLEKAMTIRIEP	SC	0	0	id_50_10819
BKP1_001544	WP_165946407.1 hypothetical protein [Burkholderia pseudomallei]_0018	WP_165946407.1	GenBank	73	103	ALRRLADEFAEMMAQGSPTAHAGDLHINRF	SC	0	0	id_50_10819
BKP1_001545	tr|A0A8D9S4V2|A0A8D9S4V2_BURPB (S)-2-haloacid dehalogenase OS=Burkholderia pseudomallei (strain 1106b) OX=357347 GN=dehII_1 PE=3 SV=1_000_030	A0A8D9S4V2	Uniprot	0	30	MSLRARALVRDEAGLYFSPGMQAGGSPIMS	SW	0	1	id_50_6298
BKP1_001546	tr|A0A8D9S4V2|A0A8D9S4V2_BURPB (S)-2-haloacid dehalogenase OS=Burkholderia pseudomallei (strain 1106b) OX=357347 GN=dehII_1 PE=3 SV=1_022_052	A0A8D9S4V2	Uniprot	22	52	AGGSPIMSDGRGAFLSDVQARRSARGGSYG	SW	0	0	id_50_6298
BKP1_001547	tr|A0A8D9S4V2|A0A8D9S4V2_BURPB (S)-2-haloacid dehalogenase OS=Burkholderia pseudomallei (strain 1106b) OX=357347 GN=dehII_1 PE=3 SV=1_066_096	A0A8D9S4V2	Uniprot	66	96	ARLAAAFGRARAFGVGPVRAADGGRSILKR	SW	0	0	id_50_6298
BKP1_001548	tr|A0A8D9S4V2|A0A8D9S4V2_BURPB (S)-2-haloacid dehalogenase OS=Burkholderia pseudomallei (strain 1106b) OX=357347 GN=dehII_1 PE=3 SV=1_088_118	A0A8D9S4V2	Uniprot	88	118	GGRSILKRHPTTQENIMQTLGVKALVFDVF	SW	0	0	id_50_6298
BKP1_001549	tr|A0A8D9S4V2|A0A8D9S4V2_BURPB (S)-2-haloacid dehalogenase OS=Burkholderia pseudomallei (strain 1106b) OX=357347 GN=dehII_1 PE=3 SV=1_110_140	A0A8D9S4V2	Uniprot	110	140	KALVFDVFGTVVDWRSGVIRDATPFLAKYG	SW	0	0	id_50_6298
BKP1_001550	tr|A0A8D9S4V2|A0A8D9S4V2_BURPB (S)-2-haloacid dehalogenase OS=Burkholderia pseudomallei (strain 1106b) OX=357347 GN=dehII_1 PE=3 SV=1_132_162	A0A8D9S4V2	Uniprot	132	162	TPFLAKYGGAGADPAAFADAWRAGYSPAME	SW	0	0	id_50_6298
BKP1_001551	tr|A0A8D9S4V2|A0A8D9S4V2_BURPB (S)-2-haloacid dehalogenase OS=Burkholderia pseudomallei (strain 1106b) OX=357347 GN=dehII_1 PE=3 SV=1_154_184	A0A8D9S4V2	Uniprot	154	184	AGYSPAMEEVRSGRRPFTRLDVLHRENLDA	SW	0	0	id_50_6298
BKP1_001552	tr|A0A8D9S4V2|A0A8D9S4V2_BURPB (S)-2-haloacid dehalogenase OS=Burkholderia pseudomallei (strain 1106b) OX=357347 GN=dehII_1 PE=3 SV=1_176_206	A0A8D9S4V2	Uniprot	176	206	LHRENLDALLPAFGIDRASVADADLDALNL	SW	0	0	id_50_6298
BKP1_001553	tr|A0A8D9S4V2|A0A8D9S4V2_BURPB (S)-2-haloacid dehalogenase OS=Burkholderia pseudomallei (strain 1106b) OX=357347 GN=dehII_1 PE=3 SV=1_198_228	A0A8D9S4V2	Uniprot	198	228	ADLDALNLAWHRLDPWPDSVAGLTRLKAHY	SW	0	0	id_50_6298
BKP1_001554	tr|A0A8D9S4V2|A0A8D9S4V2_BURPB (S)-2-haloacid dehalogenase OS=Burkholderia pseudomallei (strain 1106b) OX=357347 GN=dehII_1 PE=3 SV=1_220_250	A0A8D9S4V2	Uniprot	220	250	LTRLKAHYIIAPLSNGNVILMIDMAKRAGL	SW	0	0	id_50_6298
BKP1_001555	tr|A0A8D9S4V2|A0A8D9S4V2_BURPB (S)-2-haloacid dehalogenase OS=Burkholderia pseudomallei (strain 1106b) OX=357347 GN=dehII_1 PE=3 SV=1_242_272	A0A8D9S4V2	Uniprot	242	272	DMAKRAGLPWDAILGAEVAQAYKPTPEAYL	SW	0	0	id_50_6298
BKP1_001556	tr|A0A8D9S4V2|A0A8D9S4V2_BURPB (S)-2-haloacid dehalogenase OS=Burkholderia pseudomallei (strain 1106b) OX=357347 GN=dehII_1 PE=3 SV=1_264_294	A0A8D9S4V2	Uniprot	264	294	KPTPEAYLRTADILALRPDEVSLVAAHNGD	SW	0	0	id_50_6298
BKP1_001557	tr|A0A8D9S4V2|A0A8D9S4V2_BURPB (S)-2-haloacid dehalogenase OS=Burkholderia pseudomallei (strain 1106b) OX=357347 GN=dehII_1 PE=3 SV=1_286_316	A0A8D9S4V2	Uniprot	286	316	LVAAHNGDLAAARRSGYRTAFVARAREHGP	SW	0	0	id_50_6298
BKP1_001558	tr|A0A8D9S4V2|A0A8D9S4V2_BURPB (S)-2-haloacid dehalogenase OS=Burkholderia pseudomallei (strain 1106b) OX=357347 GN=dehII_1 PE=3 SV=1_308_338	A0A8D9S4V2	Uniprot	308	338	ARAREHGPAQTTDLRAEQDWDVVAADFIEL	SW	0	0	id_50_6298
BKP1_001559	tr|A0A8D9S4V2|A0A8D9S4V2_BURPB (S)-2-haloacid dehalogenase OS=Burkholderia pseudomallei (strain 1106b) OX=357347 GN=dehII_1 PE=3 SV=1_314_344	A0A8D9S4V2	Uniprot	314	344	GPAQTTDLRAEQDWDVVAADFIELAQRFGA	SW	0	0	id_50_6298
BKP1_001560	WP_122648002.1 haloacid dehalogenase type II [Burkholderia pseudomallei]_0176	WP_122648002.1	GenBank	81	111	LPAFGIDRTSVADADLDALNLAWHWLDPWP	SC	0	0	id_50_6298
BKP1_001561	WP_235374429.1 haloacid dehalogenase type II [Burkholderia pseudomallei]_0125	WP_235374429.1	GenBank	16	46	LSDVQARRFARGGSYGAALRASPRRAPPAG	SC	0	0	id_50_6298
BKP1_001562	WP_229653821.1 haloacid dehalogenase type II [Burkholderia pseudomallei]_0021	WP_229653821.1	GenBank	23	53	RSARGGSYGVTLRASPRRAPLAGARLAAAF	SC	0	0	id_50_6298
BKP1_001563	WP_259658686.1 haloacid dehalogenase type II [Burkholderia pseudomallei]_0002	WP_259658686.1	GenBank	35	65	FLSDVQERRSARGGSYGAVLRSSPRRAPPA	SC	0	0	id_50_6298
BKP1_001564	WP_273945509.1 haloacid dehalogenase type II [Burkholderia pseudomallei]_0135	WP_273945509.1	GenBank	0	30	MQAGGSPIMSDGRGVFLSDVQARRSARGGS	SC	0	0	id_50_6298
BKP1_001565	WP_076940921.1 HAD-IA family hydrolase, partial [Burkholderia pseudomallei]_0132	WP_076940921.1	GenBank	4	34	PAAVGVGGPGVHSPAMEEARGGRRPFTRLD	SC	0	0	id_50_6298
BKP1_001566	WP_256731917.1 haloacid dehalogenase type II [Burkholderia pseudomallei]_0164	WP_256731917.1	GenBank	127	157	AFADAWRAGYSPAMEEVRSGPRPFTRLDVL	SC	0	0	id_50_6298
BKP1_001567	WP_172872833.1 hypothetical protein [Burkholderia pseudomallei]_044_074	WP_172872833.1	GenBank	44	74	DIRFVARSIRRSLDEVLDEVSDAVRDSDDD	SW	0	1	id_50_11299
BKP1_001568	WP_172872833.1 hypothetical protein [Burkholderia pseudomallei]_110_140	WP_172872833.1	GenBank	110	140	QPARHAVDQRLRARHSTRAVAQFRSRLAAA	SW	0	0	id_50_11299
BKP1_001569	WP_172872833.1 hypothetical protein [Burkholderia pseudomallei]_132_162	WP_172872833.1	GenBank	132	162	FRSRLAAAAGDRSTGRSAHARIGASAHRRI	SW	0	0	id_50_11299
BKP1_001570	WP_172872833.1 hypothetical protein [Burkholderia pseudomallei]_154_184	WP_172872833.1	GenBank	154	184	GASAHRRIDASVSERHLIAGSSITGSSAKP	SW	0	1	id_50_11299
BKP1_001571	WP_172872833.1 hypothetical protein [Burkholderia pseudomallei]_180_210	WP_172872833.1	GenBank	180	210	SAKPASHPNAHEGKRDDRAHLNGPSTAKSP	SW	0	1	id_50_11299
BKP1_001572	WP_183155109.1 hypothetical protein [Burkholderia pseudomallei]_0041	WP_183155109.1	GenBank	165	195	SSQARVSQARVRSRHHIRTLTKASETIAHT	SC	0	0	id_50_11299
BKP1_001573	WP_259675402.1 hypothetical protein [Burkholderia pseudomallei]_0048	WP_259675402.1	GenBank	3	33	AVRDSDDDSDGDGDGDGDGNSHHDSDSDSD	SC	0	0	id_50_11299
BKP1_001574	tr|A0A8D9SKC4|A0A8D9SKC4_BURPB Uncharacterized protein OS=Burkholderia pseudomallei (strain 1106b) OX=357347 GN=BURPS1106B_A0819 PE=4 SV=1_0068	A0A8D9SKC4	Uniprot	23	53	RSSDRGSRQPPATGRPAARRMHASAHRRID	SC	0	0	id_50_11299
BKP1_001575	WP_162486966.1 hypothetical protein [Burkholderia pseudomallei]_0038	WP_162486966.1	GenBank	0	30	MSPAGAHGARHDIRFVPRSIRRSLDEVLDE	SC	0	0	id_50_11299
BKP1_001576	WP_229285692.1 hypothetical protein [Burkholderia pseudomallei]_0050	WP_229285692.1	GenBank	116	146	AVAQFRLRLAAAAGDRSTGRPVDRSTGRSA	SC	0	0	id_50_11299
BKP1_001577	WP_042971327.1 WYL domain-containing protein [Burkholderia pseudomallei]_000_030	WP_042971327.1	GenBank	0	30	MNEDPKDTGSPSQSKVSARWGQDRRLAFID	SW	0	0	id_50_7818
BKP1_001578	WP_042971327.1 WYL domain-containing protein [Burkholderia pseudomallei]_022_052	WP_042971327.1	GenBank	22	52	DRRLAFIDFRLRWDGRINRSDLTDFFGISV	SW	0	0	id_50_7818
BKP1_001579	WP_042971327.1 WYL domain-containing protein [Burkholderia pseudomallei]_044_074	WP_042971327.1	GenBank	44	74	TDFFGISVPQASLDIARYTELAPQNLEYDR	SW	0	0	id_50_7818
BKP1_001580	WP_042971327.1 WYL domain-containing protein [Burkholderia pseudomallei]_066_096	WP_042971327.1	GenBank	66	96	PQNLEYDRSSRVYQATADFHPLHAETQPDQ	SW	0	0	id_50_7818
BKP1_001581	WP_042971327.1 WYL domain-containing protein [Burkholderia pseudomallei]_088_118	WP_042971327.1	GenBank	88	118	HAETQPDQYLNELLAATEGVLEPDASFIGW	SW	0	0	id_50_7818
BKP1_001582	WP_042971327.1 WYL domain-containing protein [Burkholderia pseudomallei]_110_140	WP_042971327.1	GenBank	110	140	PDASFIGWRPPVDGVARPGRTVAADTLAAL	SW	0	0	id_50_7818
BKP1_001583	WP_042971327.1 WYL domain-containing protein [Burkholderia pseudomallei]_132_162	WP_042971327.1	GenBank	132	162	AADTLAALLKAIREASGLKVVYQSMSRPAP	SW	0	0	id_50_7818
BKP1_001584	WP_042971327.1 WYL domain-containing protein [Burkholderia pseudomallei]_154_184	WP_042971327.1	GenBank	154	184	QSMSRPAPSSRTISPHAFAYDGFRWHVRAF	SW	0	0	id_50_7818
BKP1_001585	WP_042971327.1 WYL domain-containing protein [Burkholderia pseudomallei]_176_206	WP_042971327.1	GenBank	176	206	FRWHVRAFSHSRQEFRDFVLGRILEVQGVE	SW	0	1	id_50_7818
BKP1_001586	WP_042971327.1 WYL domain-containing protein [Burkholderia pseudomallei]_198_228	WP_042971327.1	GenBank	198	228	ILEVQGVEPAGTPASEDVVWNTILTLVLAP	SW	0	0	id_50_7818
BKP1_001587	WP_042971327.1 WYL domain-containing protein [Burkholderia pseudomallei]_220_250	WP_042971327.1	GenBank	220	250	ILTLVLAPNPKLSPGGQRAIELDYGMSNGE	SW	0	0	id_50_7818
BKP1_001588	WP_042971327.1 WYL domain-containing protein [Burkholderia pseudomallei]_242_272	WP_042971327.1	GenBank	242	272	DYGMSNGEVELKSRQALLFYTLKRLGLGHQ	SW	0	1	id_50_7818
BKP1_001589	WP_042971327.1 WYL domain-containing protein [Burkholderia pseudomallei]_264_294	WP_042971327.1	GenBank	264	294	KRLGLGHQADVQPEVQQIVLKNQADLAPYL	SW	0	0	id_50_7818
BKP1_001590	WP_042971327.1 WYL domain-containing protein [Burkholderia pseudomallei]_271_301	WP_042971327.1	GenBank	271	301	QADVQPEVQQIVLKNQADLAPYLARTTETN	SW	0	0	id_50_7818
BKP1_001591	WP_179101702.1 WYL domain-containing protein [Burkholderia pseudomallei]_0209	WP_179101702.1	GenBank	83	113	ADFRPLHAATQPQQYLNELLASATGVLEPD	SC	0	0	id_50_7818
BKP1_001592	WP_003056222.1 MULTISPECIES: WYL domain-containing protein [Pseudomonadota]_0250	WP_003056222.1	GenBank	144	174	QQESILVSYQSMTSLDESVRLLSPHALGND	SC	0	0	id_50_7818
BKP1_001593	WP_003056222.1 MULTISPECIES: WYL domain-containing protein [Pseudomonadota]_0094	WP_003056222.1	GenBank	65	95	PSNLTYDRSSKTYTAAQSFHPLYQRSSAQR	SC	0	0	id_50_7818
BKP1_001594	WP_179101702.1 WYL domain-containing protein [Burkholderia pseudomallei]_0178	WP_179101702.1	GenBank	115	145	FIGWRPPIDSVPHPGRGVAAEILFALLKAI	SC	0	0	id_50_7818
BKP1_001595	WP_003056222.1 MULTISPECIES: WYL domain-containing protein [Pseudomonadota]_0213	WP_003056222.1	GenBank	118	148	PETDWAPSPWRTINEQTVEAVVRAIRQQES	SC	0	0	id_50_7818
BKP1_001596	WP_003056222.1 MULTISPECIES: WYL domain-containing protein [Pseudomonadota]_0194	WP_003056222.1	GenBank	210	240	SNQDSHWQTVLTLVLAPHPDLPAAKKRVLE	SC	0	0	id_50_7818
BKP1_001597	WP_179101702.1 WYL domain-containing protein [Burkholderia pseudomallei]_0166	WP_179101702.1	GenBank	272	302	RGTRPPETQHIMLKNEADLAPFLNSAAADS	SC	0	0	id_50_7818
BKP1_001598	WP_003056222.1 MULTISPECIES: WYL domain-containing protein [Pseudomonadota]_0097	WP_003056222.1	GenBank	93	123	QRYLAELLATKMGIVEPTASFIGSAPETDW	SC	0	0	id_50_7818
BKP1_001599	WP_179101702.1 WYL domain-containing protein [Burkholderia pseudomallei]_0108	WP_179101702.1	GenBank	197	227	GRILEVQGIEPAGRPASEDNEWNTVLPLVL	SC	0	0	id_50_7818
BKP1_001600	WP_003056222.1 MULTISPECIES: WYL domain-containing protein [Pseudomonadota]_0249	WP_003056222.1	GenBank	257	287	FLYYTLRRLGLHTKEAPDPLAQQITLKNRD	SC	0	0	id_50_7818
BKP1_001601	WP_003056222.1 MULTISPECIES: WYL domain-containing protein [Pseudomonadota]_0024	WP_003056222.1	GenBank	7	37	AAEPAEPKGLSWGLESRLQFIDFRLRWERR	SC	0	0	id_50_7818
BKP1_001602	WP_003056222.1 MULTISPECIES: WYL domain-containing protein [Pseudomonadota]_0256	WP_003056222.1	GenBank	188	218	RFSDFVLARILRIDGFEATQVDSNQDSHWQ	SC	0	0	id_50_7818
BKP1_001603	WP_179101702.1 WYL domain-containing protein [Burkholderia pseudomallei]_0190	WP_179101702.1	GenBank	153	183	VYQSMSRLEPSARTISPHAFAHDGFRWHVR	SC	0	0	id_50_7818
BKP1_001604	WP_179101702.1 WYL domain-containing protein [Burkholderia pseudomallei]_0181	WP_179101702.1	GenBank	222	252	LPLVLAPNPELSAGKQRAIELDYGMSDGET	SC	0	0	id_50_7818
BKP1_001605	WP_003056222.1 MULTISPECIES: WYL domain-containing protein [Pseudomonadota]_0077	WP_003056222.1	GenBank	32	62	RWERRINRMDLTEHFGISVPQASLDISKYM	SC	0	0	id_50_7818
BKP1_001606	WP_050859364.1 WYL domain-containing protein [Burkholderia pseudomallei]_0054	WP_050859364.1	GenBank	197	227	ILEVQGVEPTGAPASEDEAWNTILTLVLAP	SC	0	0	id_50_7818
BKP1_001607	WP_050859364.1 WYL domain-containing protein [Burkholderia pseudomallei]_0123	WP_050859364.1	GenBank	114	144	IGWRPPVDGVPRPGRTVAAETLAALLKAIR	SC	0	0	id_50_7818
BKP1_001608	WP_179101702.1 WYL domain-containing protein [Burkholderia pseudomallei]_0255	WP_179101702.1	GenBank	0	30	MIETPQDTSSPVSQPKPGARWGQDRRLAFI	SC	0	0	id_50_7818
BKP1_001609	WP_050859364.1 WYL domain-containing protein [Burkholderia pseudomallei]_0187	WP_050859364.1	GenBank	71	101	DRSSRVYQATTNFQPLHSETQPDQYLNELL	SC	0	0	id_50_7818
BKP1_001610	WP_179101702.1 WYL domain-containing protein [Burkholderia pseudomallei]_0174	WP_179101702.1	GenBank	61	91	RYTELAPQNLVYDRSSRVYQATADFRPLHA	SC	0	0	id_50_7818
BKP1_001611	WP_050859364.1 WYL domain-containing protein [Burkholderia pseudomallei]_0153	WP_050859364.1	GenBank	223	253	VLAPNPKLSPGGQRAIALDYGMRNGEAELK	SC	0	0	id_50_7818
BKP1_001612	WP_050859364.1 WYL domain-containing protein [Burkholderia pseudomallei]_0158	WP_050859364.1	GenBank	270	300	QADVQAEVQQIVLKNQADLAPYLTSSTETN	SC	0	0	id_50_7818
BKP1_001613	WP_003056222.1 MULTISPECIES: WYL domain-containing protein [Pseudomonadota]_0145	WP_003056222.1	GenBank	223	253	VLAPHPDLPAAKKRVLELDYGMEDGEVKLP	SC	0	0	id_50_7818
BKP1_001614	WP_003056222.1 MULTISPECIES: WYL domain-containing protein [Pseudomonadota]_0019	WP_003056222.1	GenBank	270	300	KEAPDPLAQQITLKNRDEIQPYIDALAAQA	SC	0	0	id_50_7818
BKP1_001615	WP_050859364.1 WYL domain-containing protein [Burkholderia pseudomallei]_0143	WP_050859364.1	GenBank	0	30	MNDPKDTDSPSPSKVSARWGQDRRLAFIDF	SC	0	0	id_50_7818
BKP1_001616	WP_003056222.1 MULTISPECIES: WYL domain-containing protein [Pseudomonadota]_0136	WP_003056222.1	GenBank	45	75	HFGISVPQASLDISKYMELAPSNLTYDRSS	SC	0	0	id_50_7818
BKP1_001617	WP_179101702.1 WYL domain-containing protein [Burkholderia pseudomallei]_0109	WP_179101702.1	GenBank	261	291	FYTLKRLGLNQRGTRPPETQHIMLKNEADL	SC	0	0	id_50_7818
BKP1_001618	WP_050859364.1 WYL domain-containing protein [Burkholderia pseudomallei]_0217	WP_050859364.1	GenBank	143	173	REASGLKVVYQSMSRPDPSSRTISPHAFAY	SC	0	0	id_50_7818
BKP1_001619	WP_004186711.1 MULTISPECIES: Kdo hydroxylase family protein [Burkholderia]_000_030	WP_004186711.1	GenBank	0	30	MSESQIIEIASADWSGQQLSVPREQLLAGL	SW	0	0	id_50_8079
BKP1_001620	WP_004186711.1 MULTISPECIES: Kdo hydroxylase family protein [Burkholderia]_022_052	WP_004186711.1	GenBank	22	52	REQLLAGLEDGKVLFFAHLRFAIEGGEEAL	SW	0	0	id_50_8079
BKP1_001621	WP_004186711.1 MULTISPECIES: Kdo hydroxylase family protein [Burkholderia]_044_074	WP_004186711.1	GenBank	44	74	IEGGEEALLDPALADPKRKNISLAPNGGAL	SW	0	0	id_50_8079
BKP1_001622	WP_004186711.1 MULTISPECIES: Kdo hydroxylase family protein [Burkholderia]_066_096	WP_004186711.1	GenBank	66	96	LAPNGGALAGVAGDAVTQSAVRALIARFQQ	SW	0	0	id_50_8079
BKP1_001623	WP_004186711.1 MULTISPECIES: Kdo hydroxylase family protein [Burkholderia]_088_118	WP_004186711.1	GenBank	88	118	ALIARFQQQAGALVDGLFPEYRGKLRVAPT	SW	0	0	id_50_8079
BKP1_001624	WP_004186711.1 MULTISPECIES: Kdo hydroxylase family protein [Burkholderia]_110_140	WP_004186711.1	GenBank	110	140	GKLRVAPTSLRLMQVETRETSWRKDDSRLH	SW	0	0	id_50_8079
BKP1_001625	WP_004186711.1 MULTISPECIES: Kdo hydroxylase family protein [Burkholderia]_132_162	WP_004186711.1	GenBank	132	162	RKDDSRLHVDAFPSRPNYGERILRVFTNVN	SW	0	0	id_50_8079
BKP1_001626	WP_004186711.1 MULTISPECIES: Kdo hydroxylase family protein [Burkholderia]_154_184	WP_004186711.1	GenBank	154	184	LRVFTNVNPAGVPRVWRVGEPFEDVAKRFL	SW	0	0	id_50_8079
BKP1_001627	WP_004186711.1 MULTISPECIES: Kdo hydroxylase family protein [Burkholderia]_176_206	WP_004186711.1	GenBank	176	206	EDVAKRFLPHIKPQVPGVAWLLELLHVTKS	SW	0	0	id_50_8079
BKP1_001628	WP_004186711.1 MULTISPECIES: Kdo hydroxylase family protein [Burkholderia]_198_228	WP_004186711.1	GenBank	198	228	ELLHVTKSRRSAYDHLMLKLHDSMKADLDY	SW	0	0	id_50_8079
BKP1_001629	WP_004186711.1 MULTISPECIES: Kdo hydroxylase family protein [Burkholderia]_220_250	WP_004186711.1	GenBank	220	250	SMKADLDYQKNSPQQTMPFPSGSVWVSFSD	SW	0	1	id_50_8079
BKP1_001630	WP_004186711.1 MULTISPECIES: Kdo hydroxylase family protein [Burkholderia]_242_272	WP_004186711.1	GenBank	242	272	SVWVSFSDQASHAVMSGQFMLEQTFFLPVG	SW	0	1	id_50_8079
BKP1_001631	WP_076808938.1 Kdo hydroxylase family protein [Burkholderia pseudomallei]_0159	WP_076808938.1	GenBank	264	294	QTFFLPVGAMARPQRAPLGILERLQGRALV	SC	0	0	id_50_8079
BKP1_001632	WP_004524753.1 efflux RND transporter permease subunit [Burkholderia pseudomallei]_000_030	WP_004524753.1	GenBank	0	30	MSRNLFAVFIRYPVATSLMTAGILFAGVAA	SW	0	1	id_50_490
BKP1_001633	WP_004524753.1 efflux RND transporter permease subunit [Burkholderia pseudomallei]_022_052	WP_004524753.1	GenBank	22	52	ILFAGVAAYFHLPVAPLPQVEFPTIQVSAV	SW	0	0	id_50_490
BKP1_001634	WP_004524753.1 efflux RND transporter permease subunit [Burkholderia pseudomallei]_044_074	WP_004524753.1	GenBank	44	74	PTIQVSAVLPGADPVSVASTLAQPLETQFS	SW	0	0	id_50_490
BKP1_001635	WP_004524753.1 efflux RND transporter permease subunit [Burkholderia pseudomallei]_066_096	WP_004524753.1	GenBank	66	96	QPLETQFSKIPYVTQMTSQSTLSSTSIVLQ	SW	0	0	id_50_490
BKP1_001636	WP_004524753.1 efflux RND transporter permease subunit [Burkholderia pseudomallei]_088_118	WP_004524753.1	GenBank	88	118	SSTSIVLQFSLERSIDAAANDVQSAIDAAA	SW	0	0	id_50_490
BKP1_001637	WP_004524753.1 efflux RND transporter permease subunit [Burkholderia pseudomallei]_1012_1042	WP_004524753.1	GenBank	1012	1042	VIYLYLDTLSNRLKARLRPLGADMPSNAHV	SW	0	0	id_50_490
BKP1_001638	WP_004524753.1 efflux RND transporter permease subunit [Burkholderia pseudomallei]_1018_1048	WP_004524753.1	GenBank	1018	1048	DTLSNRLKARLRPLGADMPSNAHVEGATQD	SW	0	0	id_50_490
BKP1_001639	WP_004524753.1 efflux RND transporter permease subunit [Burkholderia pseudomallei]_110_140	WP_004524753.1	GenBank	110	140	QSAIDAAAAQLPADLPSPPTFQKVNPADSP	SW	0	0	id_50_490
BKP1_001640	WP_004524753.1 efflux RND transporter permease subunit [Burkholderia pseudomallei]_132_162	WP_004524753.1	GenBank	132	162	KVNPADSPIMLLSAISSTLPLTTIDDYVET	SW	0	0	id_50_490
BKP1_001641	WP_004524753.1 efflux RND transporter permease subunit [Burkholderia pseudomallei]_154_184	WP_004524753.1	GenBank	154	184	TIDDYVETRLTKSLSQIDGVGSVSIGGQQK	SW	0	0	id_50_490
BKP1_001642	WP_004524753.1 efflux RND transporter permease subunit [Burkholderia pseudomallei]_176_206	WP_004524753.1	GenBank	176	206	VSIGGQQKPSIRIQLDPVKLASRGLSSEDV	SW	0	0	id_50_490
BKP1_001643	WP_004524753.1 efflux RND transporter permease subunit [Burkholderia pseudomallei]_198_228	WP_004524753.1	GenBank	198	228	RGLSSEDVRRALSGLSGVNPKGVFNGTTRS	SW	0	0	id_50_490
BKP1_001644	WP_004524753.1 efflux RND transporter permease subunit [Burkholderia pseudomallei]_220_250	WP_004524753.1	GenBank	220	250	VFNGTTRSYTIYTNGQLTEPAQWNDAIVAY	SW	0	0	id_50_490
BKP1_001645	WP_004524753.1 efflux RND transporter permease subunit [Burkholderia pseudomallei]_242_272	WP_004524753.1	GenBank	242	272	WNDAIVAYRDGTPVRIRDIGQAVLGPEDNT	SW	0	0	id_50_490
BKP1_001646	WP_004524753.1 efflux RND transporter permease subunit [Burkholderia pseudomallei]_264_294	WP_004524753.1	GenBank	264	294	VLGPEDNTLAAWIDGRRAISVGIYKKPGAN	SW	0	0	id_50_490
BKP1_001647	WP_004524753.1 efflux RND transporter permease subunit [Burkholderia pseudomallei]_286_316	WP_004524753.1	GenBank	286	316	IYKKPGANTVSTVDKIRARLPELEASLPPS	SW	0	0	id_50_490
BKP1_001648	WP_004524753.1 efflux RND transporter permease subunit [Burkholderia pseudomallei]_308_338	WP_004524753.1	GenBank	308	338	LEASLPPSLKIAVLADRTQTIRASLLDIEL	SW	0	0	id_50_490
BKP1_001649	WP_004524753.1 efflux RND transporter permease subunit [Burkholderia pseudomallei]_330_360	WP_004524753.1	GenBank	330	360	ASLLDIELTLLLNVVLVVVVIYAFLGSVRT	SW	0	0	id_50_490
BKP1_001650	WP_004524753.1 efflux RND transporter permease subunit [Burkholderia pseudomallei]_352_382	WP_004524753.1	GenBank	352	382	AFLGSVRTTIIPAVTVPVSLFGACALMWVC	SW	2	2	id_50_490
BKP1_001651	WP_004524753.1 efflux RND transporter permease subunit [Burkholderia pseudomallei]_374_404	WP_004524753.1	GenBank	374	404	ACALMWVCGYSLDNISLMAMTIAVGFVVDD	SW	2	2	id_50_490
BKP1_001652	WP_004524753.1 efflux RND transporter permease subunit [Burkholderia pseudomallei]_396_426	WP_004524753.1	GenBank	396	426	AVGFVVDDAIVMVENIARHVEAGERPLQAA	SW	0	0	id_50_490
BKP1_001653	WP_004524753.1 efflux RND transporter permease subunit [Burkholderia pseudomallei]_418_448	WP_004524753.1	GenBank	418	448	GERPLQAALKGLSETSFTIASISLSLVAVL	SW	0	0	id_50_490
BKP1_001654	WP_004524753.1 efflux RND transporter permease subunit [Burkholderia pseudomallei]_440_470	WP_004524753.1	GenBank	440	470	SLSLVAVLLPLLLMSGIIGRMFREFAVTLS	SW	0	0	id_50_490
BKP1_001655	WP_004524753.1 efflux RND transporter permease subunit [Burkholderia pseudomallei]_462_492	WP_004524753.1	GenBank	462	492	REFAVTLSMTIIVSAFVSLTLTPMMASYLL	SW	0	0	id_50_490
BKP1_001656	WP_004524753.1 efflux RND transporter permease subunit [Burkholderia pseudomallei]_484_514	WP_004524753.1	GenBank	484	514	PMMASYLLRAHRHDAGRPPRPGLFERAFAR	SW	0	0	id_50_490
BKP1_001657	WP_004524753.1 efflux RND transporter permease subunit [Burkholderia pseudomallei]_506_536	WP_004524753.1	GenBank	506	536	LFERAFARTAAAYERALDVALRHRFVTLSA	SW	0	0	id_50_490
BKP1_001658	WP_004524753.1 efflux RND transporter permease subunit [Burkholderia pseudomallei]_528_558	WP_004524753.1	GenBank	528	558	HRFVTLSAFFASVAASVFLYVGIPKGFFPQ	SW	0	1	id_50_490
BKP1_001659	WP_004524753.1 efflux RND transporter permease subunit [Burkholderia pseudomallei]_550_580	WP_004524753.1	GenBank	550	580	IPKGFFPQQDTGVITGISEAAQTISVEDMA	SW	0	0	id_50_490
BKP1_001660	WP_004524753.1 efflux RND transporter permease subunit [Burkholderia pseudomallei]_572_602	WP_004524753.1	GenBank	572	602	TISVEDMARHSMALAAIIRADPAVEHSQMA	SW	0	1	id_50_490
BKP1_001661	WP_004524753.1 efflux RND transporter permease subunit [Burkholderia pseudomallei]_594_624	WP_004524753.1	GenBank	594	624	AVEHSQMAVGGSAYAGTTVNNGRWYITLKP	SW	0	1	id_50_490
BKP1_001662	WP_004524753.1 efflux RND transporter permease subunit [Burkholderia pseudomallei]_616_646	WP_004524753.1	GenBank	616	646	RWYITLKPRDQRDATADEVIRRLRPQFAKV	SW	0	0	id_50_490
BKP1_001663	WP_004524753.1 efflux RND transporter permease subunit [Burkholderia pseudomallei]_638_668	WP_004524753.1	GenBank	638	668	LRPQFAKVPGVRMYLQAAQDVIIGARLART	SW	0	0	id_50_490
BKP1_001664	WP_004524753.1 efflux RND transporter permease subunit [Burkholderia pseudomallei]_660_690	WP_004524753.1	GenBank	660	690	IGARLARTQYQLTLQSADVGALTTWAPRLL	SW	0	0	id_50_490
BKP1_001665	WP_004524753.1 efflux RND transporter permease subunit [Burkholderia pseudomallei]_682_712	WP_004524753.1	GenBank	682	712	TTWAPRLLARLSGLPQLRDVASDQQVNGSA	SW	0	0	id_50_490
BKP1_001666	WP_004524753.1 efflux RND transporter permease subunit [Burkholderia pseudomallei]_704_734	WP_004524753.1	GenBank	704	734	DQQVNGSALSVAIDRDQAARYGLTPEAIDG	SW	0	0	id_50_490
BKP1_001667	WP_004524753.1 efflux RND transporter permease subunit [Burkholderia pseudomallei]_726_756	WP_004524753.1	GenBank	726	756	LTPEAIDGTLYDAFGSRQVAQYFTQLSTYK	SW	0	0	id_50_490
BKP1_001668	WP_004524753.1 efflux RND transporter permease subunit [Burkholderia pseudomallei]_748_778	WP_004524753.1	GenBank	748	778	FTQLSTYKVIMETLPSLQRDPGTLDRIYMK	SW	0	0	id_50_490
BKP1_001669	WP_004524753.1 efflux RND transporter permease subunit [Burkholderia pseudomallei]_770_800	WP_004524753.1	GenBank	770	800	TLDRIYMKAPSGALVPLSSVARWTTDTVQP	SW	0	0	id_50_490
BKP1_001670	WP_004524753.1 efflux RND transporter permease subunit [Burkholderia pseudomallei]_792_822	WP_004524753.1	GenBank	792	822	WTTDTVQPLSVNHQSHFPSVTISFNLAPGV	SW	0	0	id_50_490
BKP1_001671	WP_004524753.1 efflux RND transporter permease subunit [Burkholderia pseudomallei]_814_844	WP_004524753.1	GenBank	814	844	SFNLAPGVSLGEATAAIEAARASLRMPPAV	SW	0	0	id_50_490
BKP1_001672	WP_004524753.1 efflux RND transporter permease subunit [Burkholderia pseudomallei]_836_866	WP_004524753.1	GenBank	836	866	SLRMPPAVVGSFQGTAQAFQSTLATMPMLI	SW	0	0	id_50_490
BKP1_001673	WP_004524753.1 efflux RND transporter permease subunit [Burkholderia pseudomallei]_858_888	WP_004524753.1	GenBank	858	888	LATMPMLILSALIVAYLVLGALYGSFIHPW	SW	0	0	id_50_490
BKP1_001674	WP_004524753.1 efflux RND transporter permease subunit [Burkholderia pseudomallei]_880_910	WP_004524753.1	GenBank	880	910	YGSFIHPWTILSTLPSAGVGAIATLWLFKY	SW	0	0	id_50_490
BKP1_001675	WP_004524753.1 efflux RND transporter permease subunit [Burkholderia pseudomallei]_902_932	WP_004524753.1	GenBank	902	932	ATLWLFKYDFNLIALIGVILLIGIVKKNGI	SW	0	0	id_50_490
BKP1_001676	WP_004524753.1 efflux RND transporter permease subunit [Burkholderia pseudomallei]_924_954	WP_004524753.1	GenBank	924	954	GIVKKNGIMMVDFAIAATRERNMTSLDAIR	SW	0	0	id_50_490
BKP1_001677	WP_004524753.1 efflux RND transporter permease subunit [Burkholderia pseudomallei]_946_976	WP_004524753.1	GenBank	946	976	MTSLDAIRSASLLRLRPIMMTTMTALFGAL	SW	0	1	id_50_490
BKP1_001678	WP_004524753.1 efflux RND transporter permease subunit [Burkholderia pseudomallei]_968_998	WP_004524753.1	GenBank	968	998	MTALFGALPLMFTPGMGSELRQPLGYAMVG	SW	0	0	id_50_490
BKP1_001679	WP_004524753.1 efflux RND transporter permease subunit [Burkholderia pseudomallei]_990_1020	WP_004524753.1	GenBank	990	1020	PLGYAMVGGLLVSQVLTLFTTPVIYLYLDT	SW	0	0	id_50_490
BKP1_001680	tr|Q3JM86|Q3JM86_BURP1 Uncharacterized protein OS=Burkholderia pseudomallei (strain 1710b) OX=320372 GN=BURPS1710b_A0158 PE=4 SV=1_000_030	Q3JM86	Uniprot	0	30	MFRLSQKPSSRMGMKKAFVSVLPPADASIS	SW	0	0	id_50_23479
BKP1_001681	tr|Q3JM86|Q3JM86_BURP1 Uncharacterized protein OS=Burkholderia pseudomallei (strain 1710b) OX=320372 GN=BURPS1710b_A0158 PE=4 SV=1_025_055	Q3JM86	Uniprot	25	55	DASISFKGYRFPPDVISYAVWLYYRFPQSR	SW	0	0	id_50_23479
BKP1_001682	WP_004541697.1 TonB-dependent receptor [Burkholderia pseudomallei]_000_030	WP_004541697.1	GenBank	0	30	MRTPFVRAALAALSGLPSIALAQGDASASS	SW	0	1	id_50_995
BKP1_001683	WP_004541697.1 TonB-dependent receptor [Burkholderia pseudomallei]_022_052	WP_004541697.1	GenBank	22	52	QGDASASSASFASSVSYAPAAASPADADSA	SW	0	0	id_50_995
BKP1_001684	WP_004541697.1 TonB-dependent receptor [Burkholderia pseudomallei]_088_118	WP_004541697.1	GenBank	88	118	SASPARAASAAQLAPVVVTARRGPQRLADA	SW	0	0	id_50_995
BKP1_001685	WP_004541697.1 TonB-dependent receptor [Burkholderia pseudomallei]_110_140	WP_004541697.1	GenBank	110	140	GPQRLADAIPQTTLFDARDIADSGATDLPG	SW	0	0	id_50_995
BKP1_001686	WP_004541697.1 TonB-dependent receptor [Burkholderia pseudomallei]_132_162	WP_004541697.1	GenBank	132	162	SGATDLPGLLALAPGAQIVRNGGPGASASL	SW	0	0	id_50_995
BKP1_001687	WP_004541697.1 TonB-dependent receptor [Burkholderia pseudomallei]_154_184	WP_004541697.1	GenBank	154	184	GPGASASLFLRGAQPTQSLVLIDGVRVDSA	SW	0	0	id_50_995
BKP1_001688	WP_004541697.1 TonB-dependent receptor [Burkholderia pseudomallei]_176_206	WP_004541697.1	GenBank	176	206	DGVRVDSASLGQSQIAQLPLDQIERVEVVN	SW	0	0	id_50_995
BKP1_001689	WP_004541697.1 TonB-dependent receptor [Burkholderia pseudomallei]_198_228	WP_004541697.1	GenBank	198	228	IERVEVVNGNVSSLYGSGAIGGVVQVFTKN	SW	0	0	id_50_995
BKP1_001690	WP_004541697.1 TonB-dependent receptor [Burkholderia pseudomallei]_220_250	WP_004541697.1	GenBank	220	250	VVQVFTKNGGNHPPRFDFSAGYGSYHTQTQ	SW	0	0	id_50_995
BKP1_001691	WP_004541697.1 TonB-dependent receptor [Burkholderia pseudomallei]_242_272	WP_004541697.1	GenBank	242	272	GSYHTQTQSAGASGRLDPDGRTTFSVSLAR	SW	0	0	id_50_995
BKP1_001692	WP_004541697.1 TonB-dependent receptor [Burkholderia pseudomallei]_264_294	WP_004541697.1	GenBank	264	294	TFSVSLARLKTDGFSALDPARKPQANPNAN	SW	0	0	id_50_995
BKP1_001693	WP_004541697.1 TonB-dependent receptor [Burkholderia pseudomallei]_286_316	WP_004541697.1	GenBank	286	316	PQANPNANGYLNESASASLRHTFSDKWNAG	SW	0	0	id_50_995
BKP1_001694	WP_004541697.1 TonB-dependent receptor [Burkholderia pseudomallei]_308_338	WP_004541697.1	GenBank	308	338	FSDKWNAGVTYFQANGRNSYDDAYGSPADL	SW	0	0	id_50_995
BKP1_001695	WP_004541697.1 TonB-dependent receptor [Burkholderia pseudomallei]_330_360	WP_004541697.1	GenBank	330	360	AYGSPADLNDLYSRVQQLSAFANGALADGW	SW	0	0	id_50_995
BKP1_001696	WP_004541697.1 TonB-dependent receptor [Burkholderia pseudomallei]_352_382	WP_004541697.1	GenBank	352	382	NGALADGWTTRVSVSSGKDRNQSALNGAYT	SW	0	0	id_50_995
BKP1_001697	WP_004541697.1 TonB-dependent receptor [Burkholderia pseudomallei]_374_404	WP_004541697.1	GenBank	374	404	SALNGAYTDHFNTDNRQYTWQNDFAIARGH	SW	0	0	id_50_995
BKP1_001698	WP_004541697.1 TonB-dependent receptor [Burkholderia pseudomallei]_396_426	WP_004541697.1	GenBank	396	426	DFAIARGHKIQAGYERLDQSFESNKYSAPE	SW	0	0	id_50_995
BKP1_001699	WP_004541697.1 TonB-dependent receptor [Burkholderia pseudomallei]_418_448	WP_004541697.1	GenBank	418	448	SNKYSAPERHVNSGWLGYTGRIGDSRFQAN	SW	0	0	id_50_995
BKP1_001700	WP_004541697.1 TonB-dependent receptor [Burkholderia pseudomallei]_440_470	WP_004541697.1	GenBank	440	470	GDSRFQANVRRDQYSDFGGANSYYLGYGFD	SW	0	0	id_50_995
BKP1_001701	WP_004541697.1 TonB-dependent receptor [Burkholderia pseudomallei]_462_492	WP_004541697.1	GenBank	462	492	YYLGYGFDVTEHWTVSASYSSAFRAPSFND	SW	0	0	id_50_995
BKP1_001702	WP_004541697.1 TonB-dependent receptor [Burkholderia pseudomallei]_484_514	WP_004541697.1	GenBank	484	514	FRAPSFNDLYYPNSGNLSIRPERSHSVEAA	SW	0	0	id_50_995
BKP1_001703	WP_004541697.1 TonB-dependent receptor [Burkholderia pseudomallei]_506_536	WP_004541697.1	GenBank	506	536	RSHSVEAAVQYASDDVGVVRVTAFQTRYTN	SW	0	0	id_50_995
BKP1_001704	WP_004541697.1 TonB-dependent receptor [Burkholderia pseudomallei]_528_558	WP_004541697.1	GenBank	528	558	AFQTRYTNLIDYRPGASGPYYVAQNVGRAK	SW	0	0	id_50_995
BKP1_001705	WP_004541697.1 TonB-dependent receptor [Burkholderia pseudomallei]_550_580	WP_004541697.1	GenBank	550	580	AQNVGRAKVQGVEGSWQGHVGGTDVRIAAT	SW	0	0	id_50_995
BKP1_001706	WP_004541697.1 TonB-dependent receptor [Burkholderia pseudomallei]_572_602	WP_004541697.1	GenBank	572	602	TDVRIAATLQNPVDETAGRDLNRRARRFAS	SW	0	0	id_50_995
BKP1_001707	WP_004541697.1 TonB-dependent receptor [Burkholderia pseudomallei]_594_624	WP_004541697.1	GenBank	594	624	RRARRFASISANRSFGGWRVGGEWLASGAR	SW	0	0	id_50_995
BKP1_001708	WP_004541697.1 TonB-dependent receptor [Burkholderia pseudomallei]_616_646	WP_004541697.1	GenBank	616	646	EWLASGARDDFGDRLGGYGIVNLSARYDIT	SW	0	0	id_50_995
BKP1_001709	WP_004541697.1 TonB-dependent receptor [Burkholderia pseudomallei]_638_668	WP_004541697.1	GenBank	638	668	LSARYDITKSWYVSARIDNLFDKDYELAYA	SW	0	0	id_50_995
BKP1_001710	WP_004541697.1 TonB-dependent receptor [Burkholderia pseudomallei]_655_685	WP_004541697.1	GenBank	655	685	DNLFDKDYELAYAYNTPRRGAYVTLGWQQR	SW	0	0	id_50_995
BKP1_001711	WP_004552182.1 hypothetical protein [Burkholderia pseudomallei]_000_030	WP_004552182.1	GenBank	0	30	MRVNEPVVRVLASMCVLFCVHAAVAASAPL	SW	2	2	id_50_9189
BKP1_001712	WP_004552182.1 hypothetical protein [Burkholderia pseudomallei]_022_052	WP_004552182.1	GenBank	22	52	AVAASAPLGQDEAVPGHFVIGPGAGDTHSH	SW	0	0	id_50_9189
BKP1_001713	WP_004552182.1 hypothetical protein [Burkholderia pseudomallei]_066_096	WP_004552182.1	GenBank	66	96	AHVRVTEAIDKGLNFFAIQVNFPNKTWAHG	SW	0	0	id_50_9189
BKP1_001714	WP_004552182.1 hypothetical protein [Burkholderia pseudomallei]_088_118	WP_004552182.1	GenBank	88	118	PNKTWAHGGLQLVRGKYQMNWGGLVNRGGG	SW	0	0	id_50_9189
BKP1_001715	WP_004552182.1 hypothetical protein [Burkholderia pseudomallei]_110_140	WP_004552182.1	GenBank	110	140	GLVNRGGGSTDYRVENPVSDLQLMQNGPNS	SW	0	0	id_50_9189
BKP1_001716	WP_004552182.1 hypothetical protein [Burkholderia pseudomallei]_132_162	WP_004552182.1	GenBank	132	162	LMQNGPNSERSAPYAWKAGKEYVLTIERGR	SW	0	0	id_50_9189
BKP1_001717	WP_004552182.1 hypothetical protein [Burkholderia pseudomallei]_154_184	WP_004552182.1	GenBank	154	184	VLTIERGRQVTLPPGEYVFIGNGPKVAVAE	SW	0	0	id_50_9189
BKP1_001718	WP_004552182.1 hypothetical protein [Burkholderia pseudomallei]_176_206	WP_004552182.1	GenBank	176	206	GPKVAVAEARTMWEWRFTLKPADGEGPVQV	SW	0	0	id_50_9189
BKP1_001719	WP_004552182.1 hypothetical protein [Burkholderia pseudomallei]_198_228	WP_004552182.1	GenBank	198	228	DGEGPVQVSTLYDAADRIGSFYIWNESGYG	SW	0	1	id_50_9189
BKP1_001720	WP_004552182.1 hypothetical protein [Burkholderia pseudomallei]_220_250	WP_004552182.1	GenBank	220	250	IWNECGYGSCGNGQSATWSMPEYARIGAAG	SW	2	2	id_50_9189
BKP1_001721	WP_004552182.1 hypothetical protein [Burkholderia pseudomallei]_231_261	WP_004552182.1	GenBank	231	261	NGQSATWSMPEYARIGAAGGNVRAQALKRF	SW	0	0	id_50_9189
BKP1_001722	WP_038719340.1 MULTISPECIES: hypothetical protein [Burkholderia]_0155	WP_038719340.1	GenBank	4	34	VHAAVAASAPLGQDEAVPDHFVIGPGAGDT	SC	0	0	id_50_9189
BKP1_001723	WP_080314888.1 hypothetical protein [Burkholderia pseudomallei]_0165	WP_080314888.1	GenBank	56	86	GTPHDLVKVSVHVRVTEAIDKGLNFFAIQV	SC	0	0	id_50_9189
BKP1_001724	WP_038748040.1 hypothetical protein [Burkholderia pseudomallei]_0183	WP_038748040.1	GenBank	26	56	IGPGAGDTRSHAAFPGTPHDLVKVSAHVRV	SC	0	0	id_50_9189
BKP1_001725	WP_060547821.1 hypothetical protein [Burkholderia pseudomallei]_0190	WP_060547821.1	GenBank	178	208	TLKPADGEGPVQVSTLYDVADRIGSFYIWN	SC	0	0	id_50_9189
BKP1_001726	WP_179101753.1 hypothetical protein [Burkholderia pseudomallei]_0027	WP_179101753.1	GenBank	19	49	AVPGHFVIGPGTGDTHSHAAFPGTPHDLVK	SC	0	0	id_50_9189
BKP1_001727	WP_183157704.1 hypothetical protein [Burkholderia pseudomallei]_0175	WP_183157704.1	GenBank	34	64	HSHAAFPGTPHDLVKVSTHVRVTEAIDKGL	SC	0	0	id_50_9189
BKP1_001728	WP_223872034.1 hypothetical protein [Burkholderia pseudomallei]_0051	WP_223872034.1	GenBank	46	76	GDTHSHAAFPSTPHDLVKVSAHVRVTEAID	SC	0	0	id_50_9189
BKP1_001729	WP_154233921.1 hypothetical protein [Burkholderia pseudomallei]_000_030	WP_154233921.1	GenBank	0	30	MNSDDEAFPITPDFLVRSSAALRKRPVLFR	SW	0	1	id_50_18271
BKP1_001730	WP_154233921.1 hypothetical protein [Burkholderia pseudomallei]_022_052	WP_154233921.1	GenBank	22	52	RKRPVLFRDSLGTVPVIERDGRAFAVRLAD	SW	0	0	id_50_18271
BKP1_001731	WP_154233921.1 hypothetical protein [Burkholderia pseudomallei]_044_074	WP_154233921.1	GenBank	44	74	AFAVRLADIPEPHRTAFAAALRGSQVPVLE	SW	0	0	id_50_18271
BKP1_001732	WP_154233921.1 hypothetical protein [Burkholderia pseudomallei]_064_094	WP_154233921.1	GenBank	64	94	LRGSQVPVLEGEGDLAYAWDFADWVSGTPR	SW	0	1	id_50_18271
BKP1_001733	WP_076908946.1 hypothetical protein [Burkholderia pseudomallei]_0040	WP_076908946.1	GenBank	27	57	KEPEMFRESLATVPVIEHEGRPFAVRLADI	SC	0	0	id_50_18271
BKP1_001734	WP_076908946.1 hypothetical protein [Burkholderia pseudomallei]_0059	WP_076908946.1	GenBank	3	33	LDRFGGEVQPLSADDLVKMSKELRKEPEMF	SC	0	0	id_50_18271
BKP1_001735	WP_270956532.1 hypothetical protein [Burkholderia pseudomallei]_0069	WP_270956532.1	GenBank	7	37	GEDFKALTPDVLVQMSRDERTRPELFRASL	SC	0	0	id_50_18271
BKP1_001736	WP_208837564.1 hypothetical protein [Burkholderia pseudomallei]_0003	WP_208837564.1	GenBank	43	73	RAFAVRLVDIPEPHRTAFATALQGSQVPVL	SC	0	0	id_50_18271
BKP1_001737	WP_270956532.1 hypothetical protein [Burkholderia pseudomallei]_0033	WP_270956532.1	GenBank	53	83	LADIPEPHRTAFDQALTGSAVPVLEGEGDL	SC	0	0	id_50_18271
BKP1_001738	WP_208837564.1 hypothetical protein [Burkholderia pseudomallei]_0044	WP_208837564.1	GenBank	66	96	GSQVPVLEGEGDLAYAWDFADWVRGTPSWL	SC	0	0	id_50_18271
BKP1_001739	WP_270956532.1 hypothetical protein [Burkholderia pseudomallei]_0013	WP_270956532.1	GenBank	0	30	MEKPKFEGEDFKALTPDVLVQMSRDERTRP	SC	0	0	id_50_18271
BKP1_001740	WP_076908946.1 hypothetical protein [Burkholderia pseudomallei]_0028	WP_076908946.1	GenBank	43	73	EHEGRPFAVRLADIPEPHRTAFDRALTGSA	SC	0	0	id_50_18271
BKP1_001741	WP_270956532.1 hypothetical protein [Burkholderia pseudomallei]_0065	WP_270956532.1	GenBank	70	100	GSAVPVLEGEGDLAYAWDFADWVRGTRRWL	SC	0	0	id_50_18271
BKP1_001742	tr|A0A0H3HJ16|A0A0H3HJ16_BURP2 Major facilitator transporter OS=Burkholderia pseudomallei (strain 1026b) OX=884204 GN=BP1026B_I1274 PE=4 SV=1_000_030	A0A0H3HJ16	Uniprot	0	30	MLLFFAWFQFATIKRDIAMQAPPAAPAAAP	SW	0	0	id_50_4220
BKP1_001743	tr|A0A0H3HJ16|A0A0H3HJ16_BURP2 Major facilitator transporter OS=Burkholderia pseudomallei (strain 1026b) OX=884204 GN=BP1026B_I1274 PE=4 SV=1_022_052	A0A0H3HJ16	Uniprot	22	52	PAAPAAAPLRTADSPMTQTALPRGTVALFA	SW	0	0	id_50_4220
BKP1_001744	tr|A0A0H3HJ16|A0A0H3HJ16_BURP2 Major facilitator transporter OS=Burkholderia pseudomallei (strain 1026b) OX=884204 GN=BP1026B_I1274 PE=4 SV=1_044_074	A0A0H3HJ16	Uniprot	44	74	RGTVALFAGASGLSVANVYYAQPLLDALAA	SW	0	0	id_50_4220
BKP1_001745	tr|A0A0H3HJ16|A0A0H3HJ16_BURP2 Major facilitator transporter OS=Burkholderia pseudomallei (strain 1026b) OX=884204 GN=BP1026B_I1274 PE=4 SV=1_066_096	A0A0H3HJ16	Uniprot	66	96	PLLDALAADFTIGRAAIGGVVTATQIGSAL	SW	0	0	id_50_4220
BKP1_001746	tr|A0A0H3HJ16|A0A0H3HJ16_BURP2 Major facilitator transporter OS=Burkholderia pseudomallei (strain 1026b) OX=884204 GN=BP1026B_I1274 PE=4 SV=1_088_118	A0A0H3HJ16	Uniprot	88	118	ATQIGSALALLLLVPLGDLVDRRRLMLVQS	SW	0	1	id_50_4220
BKP1_001747	tr|A0A0H3HJ16|A0A0H3HJ16_BURP2 Major facilitator transporter OS=Burkholderia pseudomallei (strain 1026b) OX=884204 GN=BP1026B_I1274 PE=4 SV=1_110_140	A0A0H3HJ16	Uniprot	110	140	RRLMLVQSLALAATLIAVGFASASAVLIAG	SW	0	0	id_50_4220
BKP1_001748	tr|A0A0H3HJ16|A0A0H3HJ16_BURP2 Major facilitator transporter OS=Burkholderia pseudomallei (strain 1026b) OX=884204 GN=BP1026B_I1274 PE=4 SV=1_132_162	A0A0H3HJ16	Uniprot	132	162	ASAVLIAGMLGTGLLGTAMTQGLVSYAASA	SW	0	0	id_50_4220
BKP1_001749	tr|A0A0H3HJ16|A0A0H3HJ16_BURP2 Major facilitator transporter OS=Burkholderia pseudomallei (strain 1026b) OX=884204 GN=BP1026B_I1274 PE=4 SV=1_154_184	A0A0H3HJ16	Uniprot	154	184	LVSYAASASASHERGRVVGAAQGGVVIGLL	SW	0	0	id_50_4220
BKP1_001750	tr|A0A0H3HJ16|A0A0H3HJ16_BURP2 Major facilitator transporter OS=Burkholderia pseudomallei (strain 1026b) OX=884204 GN=BP1026B_I1274 PE=4 SV=1_176_206	A0A0H3HJ16	Uniprot	176	206	GGVVIGLLLARVLAGFVGDVAGWRGVYFLS	SW	0	0	id_50_4220
BKP1_001751	tr|A0A0H3HJ16|A0A0H3HJ16_BURP2 Major facilitator transporter OS=Burkholderia pseudomallei (strain 1026b) OX=884204 GN=BP1026B_I1274 PE=4 SV=1_198_228	A0A0H3HJ16	Uniprot	198	228	WRGVYFLSAATMLALAALLARKLPALAPAS	SW	0	0	id_50_4220
BKP1_001752	tr|A0A0H3HJ16|A0A0H3HJ16_BURP2 Major facilitator transporter OS=Burkholderia pseudomallei (strain 1026b) OX=884204 GN=BP1026B_I1274 PE=4 SV=1_220_250	A0A0H3HJ16	Uniprot	220	250	LPALAPASPRIGYPRLIASLFGLLRDERVL	SW	0	0	id_50_4220
BKP1_001753	tr|A0A0H3HJ16|A0A0H3HJ16_BURP2 Major facilitator transporter OS=Burkholderia pseudomallei (strain 1026b) OX=884204 GN=BP1026B_I1274 PE=4 SV=1_242_272	A0A0H3HJ16	Uniprot	242	272	LLRDERVLQIRGMLAMLMFAAFNIFWSALA	SW	0	0	id_50_4220
BKP1_001754	tr|A0A0H3HJ16|A0A0H3HJ16_BURP2 Major facilitator transporter OS=Burkholderia pseudomallei (strain 1026b) OX=884204 GN=BP1026B_I1274 PE=4 SV=1_264_294	A0A0H3HJ16	Uniprot	264	294	NIFWSALALPLSAPPYTLSHTAIGAFGLVG	SW	0	0	id_50_4220
BKP1_001755	tr|A0A0H3HJ16|A0A0H3HJ16_BURP2 Major facilitator transporter OS=Burkholderia pseudomallei (strain 1026b) OX=884204 GN=BP1026B_I1274 PE=4 SV=1_286_316	A0A0H3HJ16	Uniprot	286	316	IGAFGLVGALGAFAAARAGHWADRGFGQPT	SW	0	0	id_50_4220
BKP1_001756	tr|A0A0H3HJ16|A0A0H3HJ16_BURP2 Major facilitator transporter OS=Burkholderia pseudomallei (strain 1026b) OX=884204 GN=BP1026B_I1274 PE=4 SV=1_308_338	A0A0H3HJ16	Uniprot	308	338	DRGFGQPTSAAALALLLASWLPLAFMPMSL	SW	0	0	id_50_4220
BKP1_001757	tr|A0A0H3HJ16|A0A0H3HJ16_BURP2 Major facilitator transporter OS=Burkholderia pseudomallei (strain 1026b) OX=884204 GN=BP1026B_I1274 PE=4 SV=1_330_360	A0A0H3HJ16	Uniprot	330	360	LAFMPMSLWALVLGIVLLDAGGQAIHVTNQ	SW	0	0	id_50_4220
BKP1_001758	tr|A0A0H3HJ16|A0A0H3HJ16_BURP2 Major facilitator transporter OS=Burkholderia pseudomallei (strain 1026b) OX=884204 GN=BP1026B_I1274 PE=4 SV=1_352_382	A0A0H3HJ16	Uniprot	352	382	QAIHVTNQSMIFRARPDAHSRLIAAYMLFY	SW	0	0	id_50_4220
BKP1_001759	tr|A0A0H3HJ16|A0A0H3HJ16_BURP2 Major facilitator transporter OS=Burkholderia pseudomallei (strain 1026b) OX=884204 GN=BP1026B_I1274 PE=4 SV=1_374_404	A0A0H3HJ16	Uniprot	374	404	IAAYMLFYSVGSGLGAIASTAVYATHGWRG	SW	0	0	id_50_4220
BKP1_001760	tr|A0A0H3HJ16|A0A0H3HJ16_BURP2 Major facilitator transporter OS=Burkholderia pseudomallei (strain 1026b) OX=884204 GN=BP1026B_I1274 PE=4 SV=1_396_426	A0A0H3HJ16	Uniprot	396	426	YATHGWRGVSMLGAAVSAAALIFWAATARP	SW	0	1	id_50_4220
BKP1_001761	tr|A0A0H3HJ16|A0A0H3HJ16_BURP2 Major facilitator transporter OS=Burkholderia pseudomallei (strain 1026b) OX=884204 GN=BP1026B_I1274 PE=4 SV=1_413_443	A0A0H3HJ16	Uniprot	413	443	AAALIFWAATARPTPNEAASAHTANGRLRR	SW	0	0	id_50_4220
BKP1_001762	WP_208835615.1 NAD(P)-dependent alcohol dehydrogenase [Burkholderia pseudomallei]_000_030	WP_208835615.1	GenBank	0	30	MKALVLEKARELALRDIDLPLEVGPADVKI	SW	0	0	id_50_6502
BKP1_001763	WP_208835615.1 NAD(P)-dependent alcohol dehydrogenase [Burkholderia pseudomallei]_022_052	WP_208835615.1	GenBank	22	52	VGPADVKIRVHTVGVGGSDVHYYMHGGIGP	SW	0	0	id_50_6502
BKP1_001764	WP_208835615.1 NAD(P)-dependent alcohol dehydrogenase [Burkholderia pseudomallei]_044_074	WP_208835615.1	GenBank	44	74	YMHGGIGPFRVDAPMVLGHEASGTVVEVGR	SW	0	0	id_50_6502
BKP1_001765	WP_208835615.1 NAD(P)-dependent alcohol dehydrogenase [Burkholderia pseudomallei]_066_096	WP_208835615.1	GenBank	66	96	GTVVEVGRDVTYLRVGERVSMEPGVPRFDS	SW	0	1	id_50_6502
BKP1_001766	WP_208835615.1 NAD(P)-dependent alcohol dehydrogenase [Burkholderia pseudomallei]_088_118	WP_208835615.1	GenBank	88	118	PGVPRFDSKATLHGLYNLDPSVRFWATPPV	SW	0	0	id_50_6502
BKP1_001767	WP_208835615.1 NAD(P)-dependent alcohol dehydrogenase [Burkholderia pseudomallei]_110_140	WP_208835615.1	GenBank	110	140	RFWATPPVHGSLAPYVVHPAAFTYRLPPNV	SW	0	0	id_50_6502
BKP1_001768	WP_208835615.1 NAD(P)-dependent alcohol dehydrogenase [Burkholderia pseudomallei]_132_162	WP_208835615.1	GenBank	132	162	TYRLPPNVSFAEGAIVEPLAIGLQAAKKAA	SW	0	0	id_50_6502
BKP1_001769	WP_208835615.1 NAD(P)-dependent alcohol dehydrogenase [Burkholderia pseudomallei]_154_184	WP_208835615.1	GenBank	154	184	LQAAKKAAMKPGDIAVVVGAGTIGAMTALA	SW	0	0	id_50_6502
BKP1_001770	WP_208835615.1 NAD(P)-dependent alcohol dehydrogenase [Burkholderia pseudomallei]_176_206	WP_208835615.1	GenBank	176	206	IGAMTALAALAGGAARVILADVVKEKLALF	SW	0	0	id_50_6502
BKP1_001771	WP_208835615.1 NAD(P)-dependent alcohol dehydrogenase [Burkholderia pseudomallei]_198_228	WP_208835615.1	GenBank	198	228	VKEKLALFAANRAVTTVDASTQSLADAVAH	SW	0	0	id_50_6502
BKP1_001772	WP_208835615.1 NAD(P)-dependent alcohol dehydrogenase [Burkholderia pseudomallei]_220_250	WP_208835615.1	GenBank	220	250	SLADAVAHATDGWGADVVFEASGNANAYAG	SW	0	0	id_50_6502
BKP1_001773	WP_208835615.1 NAD(P)-dependent alcohol dehydrogenase [Burkholderia pseudomallei]_242_272	WP_208835615.1	GenBank	242	272	GNANAYAGIVDLLCPNGCLVLVGMPLAPVP	SW	2	2	id_50_6502
BKP1_001774	WP_208835615.1 NAD(P)-dependent alcohol dehydrogenase [Burkholderia pseudomallei]_264_294	WP_208835615.1	GenBank	264	294	GMPLAPVPLDVVSLQAKEARIESVFRYANV	SW	0	0	id_50_6502
BKP1_001775	WP_208835615.1 NAD(P)-dependent alcohol dehydrogenase [Burkholderia pseudomallei]_286_316	WP_208835615.1	GenBank	286	316	SVFRYANVFPRALALIASGAIDVKPFISRT	SW	0	0	id_50_6502
BKP1_001776	WP_208835615.1 NAD(P)-dependent alcohol dehydrogenase [Burkholderia pseudomallei]_314_344	WP_208835615.1	GenBank	314	344	RTFPFSDGLRAFEAAASGQPHDVKIQIEMD	SW	0	0	id_50_6502
BKP1_001777	WP_050042250.1 NAD(P)-dependent alcohol dehydrogenase [Burkholderia pseudomallei]_0138	WP_050042250.1	GenBank	224	254	AVAHATDGWGVDVVFEASGNASAYAGIVDL	SC	0	0	id_50_6502
BKP1_001778	WP_076929179.1 NAD(P)-dependent alcohol dehydrogenase [Burkholderia pseudomallei]_0050	WP_076929179.1	GenBank	307	337	DVKPFISRTFPFSDGLHAFEAAASGQPHDV	SC	0	0	id_50_6502
BKP1_001779	WP_076929179.1 NAD(P)-dependent alcohol dehydrogenase [Burkholderia pseudomallei]_0127	WP_076929179.1	GenBank	205	235	FAANRAVTTVDASTQSLAGAVAHATDGWGA	SC	0	0	id_50_6502
BKP1_001780	WP_038795673.1 chemotaxis protein CheA [Burkholderia pseudomallei]_000_030	WP_038795673.1	GenBank	0	30	MTLDITQFYQTFFDEADELLAQMEQLLLNL	SW	0	0	id_50_1091
BKP1_001781	WP_038795673.1 chemotaxis protein CheA [Burkholderia pseudomallei]_022_052	WP_038795673.1	GenBank	22	52	MEQLLLNLDVASPDPEDLAAIFRAAHSIKG	SW	0	0	id_50_1091
BKP1_001782	WP_038795673.1 chemotaxis protein CheA [Burkholderia pseudomallei]_044_074	WP_038795673.1	GenBank	44	74	RAAHSIKGGAATFGFTALTETTHILESLLD	SW	0	0	id_50_1091
BKP1_001783	WP_038795673.1 chemotaxis protein CheA [Burkholderia pseudomallei]_066_096	WP_038795673.1	GenBank	66	96	HILESLLDRARNHELTLTKEMVDAFLETKD	SW	0	0	id_50_1091
BKP1_001784	WP_038795673.1 chemotaxis protein CheA [Burkholderia pseudomallei]_088_118	WP_038795673.1	GenBank	88	118	DAFLETKDVLSDQLADYRASAEPDAAAAAA	SW	0	0	id_50_1091
BKP1_001785	WP_038795673.1 chemotaxis protein CheA [Burkholderia pseudomallei]_154_184	WP_038795673.1	GenBank	154	184	AAEPVPAATAAPATSAMGLFGAPEHVVEQA	SW	0	0	id_50_1091
BKP1_001786	WP_038795673.1 chemotaxis protein CheA [Burkholderia pseudomallei]_176_206	WP_038795673.1	GenBank	176	206	PEHVVEQAVEAAHPVAGAPEAAAGGDGPHL	SW	0	0	id_50_1091
BKP1_001787	WP_038795673.1 chemotaxis protein CheA [Burkholderia pseudomallei]_198_228	WP_038795673.1	GenBank	198	228	AGGDGPHLKITLTGVDDKDQELLTEELGNL	SW	0	0	id_50_1091
BKP1_001788	WP_038795673.1 chemotaxis protein CheA [Burkholderia pseudomallei]_220_250	WP_038795673.1	GenBank	220	250	LTEELGNLGRIVGRTKTGDALALWLETDVS	SW	0	0	id_50_1091
BKP1_001789	WP_038795673.1 chemotaxis protein CheA [Burkholderia pseudomallei]_242_272	WP_038795673.1	GenBank	242	272	LWLETDVSSDDIVAVCCFVIDESQIAIGRG	SW	2	2	id_50_1091
BKP1_001790	WP_038795673.1 chemotaxis protein CheA [Burkholderia pseudomallei]_264_294	WP_038795673.1	GenBank	264	294	SQIAIGRGTAPGAGDAQAAPAARQPGEAAP	SW	0	0	id_50_1091
BKP1_001791	WP_038795673.1 chemotaxis protein CheA [Burkholderia pseudomallei]_286_316	WP_038795673.1	GenBank	286	316	RQPGEAAPEPAAEQAAPEPAAAQPAAAPVA	SW	0	0	id_50_1091
BKP1_001792	WP_038795673.1 chemotaxis protein CheA [Burkholderia pseudomallei]_352_382	WP_038795673.1	GenBank	352	382	SAAAQHQDDRKPRPAVAASAEGSSIRVGVE	SW	0	0	id_50_1091
BKP1_001793	WP_038795673.1 chemotaxis protein CheA [Burkholderia pseudomallei]_374_404	WP_038795673.1	GenBank	374	404	SSIRVGVEKVDQLINLVGELVITQAMLAET	SW	0	0	id_50_1091
BKP1_001794	WP_038795673.1 chemotaxis protein CheA [Burkholderia pseudomallei]_396_426	WP_038795673.1	GenBank	396	426	TQAMLAETTSAFDPALHDRLYNGMAQLERN	SW	0	0	id_50_1091
BKP1_001795	WP_038795673.1 chemotaxis protein CheA [Burkholderia pseudomallei]_418_448	WP_038795673.1	GenBank	418	448	GMAQLERNARDLQEAVMSIRMMPMDYVFSR	SW	0	0	id_50_1091
BKP1_001796	WP_038795673.1 chemotaxis protein CheA [Burkholderia pseudomallei]_440_470	WP_038795673.1	GenBank	440	470	PMDYVFSRFPRLVRDLAGKLGKQVELVTFG	SW	0	0	id_50_1091
BKP1_001797	WP_038795673.1 chemotaxis protein CheA [Burkholderia pseudomallei]_462_492	WP_038795673.1	GenBank	462	492	QVELVTFGQATELDKSLIERIIDPLTHLVR	SW	0	0	id_50_1091
BKP1_001798	WP_038795673.1 chemotaxis protein CheA [Burkholderia pseudomallei]_484_514	WP_038795673.1	GenBank	484	514	DPLTHLVRNSLDHGIETVEARRAAGKDAVG	SW	0	0	id_50_1091
BKP1_001799	WP_038795673.1 chemotaxis protein CheA [Burkholderia pseudomallei]_506_536	WP_038795673.1	GenBank	506	536	AAGKDAVGQLVLSAAHHGGNIVIEVSDDGA	SW	0	0	id_50_1091
BKP1_001800	WP_038795673.1 chemotaxis protein CheA [Burkholderia pseudomallei]_528_558	WP_038795673.1	GenBank	528	558	IEVSDDGAGLNRERILAKAAKQGMQISENI	SW	0	0	id_50_1091
BKP1_001801	WP_038795673.1 chemotaxis protein CheA [Burkholderia pseudomallei]_550_580	WP_038795673.1	GenBank	550	580	GMQISENISDDEVWNLIFAPGFSTAEVVTD	SW	0	0	id_50_1091
BKP1_001802	WP_038795673.1 chemotaxis protein CheA [Burkholderia pseudomallei]_572_602	WP_038795673.1	GenBank	572	602	STAEVVTDVSGRGVGMDVVKRNIQSMGGHV	SW	0	0	id_50_1091
BKP1_001803	WP_038795673.1 chemotaxis protein CheA [Burkholderia pseudomallei]_594_624	WP_038795673.1	GenBank	594	624	IQSMGGHVEISSQAGRGTTTRIVLPLTLAI	SW	0	0	id_50_1091
BKP1_001804	WP_038795673.1 chemotaxis protein CheA [Burkholderia pseudomallei]_616_646	WP_038795673.1	GenBank	616	646	VLPLTLAILDGMSVKVGNEIFILPLNFVME	SW	0	0	id_50_1091
BKP1_001805	WP_038795673.1 chemotaxis protein CheA [Burkholderia pseudomallei]_638_668	WP_038795673.1	GenBank	638	668	LPLNFVMESLQPAADDIYTIGNGERVVRVR	SW	0	0	id_50_1091
BKP1_001806	WP_038795673.1 chemotaxis protein CheA [Burkholderia pseudomallei]_660_690	WP_038795673.1	GenBank	660	690	GERVVRVRGEYLPLVALHEVFSVDDARTDP	SW	0	0	id_50_1091
BKP1_001807	WP_038795673.1 chemotaxis protein CheA [Burkholderia pseudomallei]_682_712	WP_038795673.1	GenBank	682	712	VDDARTDPTQGIVTIMQTEGRRFAMLIDEL	SW	0	0	id_50_1091
BKP1_001808	WP_038795673.1 chemotaxis protein CheA [Burkholderia pseudomallei]_704_734	WP_038795673.1	GenBank	704	734	FAMLIDELVGQQQVVVKNLETNYRKVYGIS	SW	0	0	id_50_1091
BKP1_001809	WP_038795673.1 chemotaxis protein CheA [Burkholderia pseudomallei]_726_756	WP_038795673.1	GenBank	726	756	YRKVYGISAATILGDGSVALIVDVAALNRE	SW	0	0	id_50_1091
BKP1_001810	WP_038795673.1 chemotaxis protein CheA [Burkholderia pseudomallei]_742_772	WP_038795673.1	GenBank	742	772	SVALIVDVAALNRETRAAHGAHSSAALAAS	SW	0	0	id_50_1091
BKP1_001811	WP_223870633.1 hypothetical protein [Burkholderia pseudomallei]_000_030	WP_223870633.1	GenBank	0	30	MPLVLLSRREHAAKARGAPAIGGDWWRASA	SW	0	0	id_50_9066
BKP1_001812	WP_223870633.1 hypothetical protein [Burkholderia pseudomallei]_044_074	WP_223870633.1	GenBank	44	74	AGISARFADALFDMHVGLGALHSSGVRVLL	SW	0	0	id_50_9066
BKP1_001813	WP_223870633.1 hypothetical protein [Burkholderia pseudomallei]_110_140	WP_223870633.1	GenBank	110	140	TSRRADEPMSRHADGSTVPSVYESIPVSPM	SW	0	0	id_50_9066
BKP1_001814	WP_223870633.1 hypothetical protein [Burkholderia pseudomallei]_132_162	WP_223870633.1	GenBank	132	162	ESIPVSPMQSRRLADSPIYRFASASRAAVP	SW	0	1	id_50_9066
BKP1_001815	WP_223870633.1 hypothetical protein [Burkholderia pseudomallei]_154_184	WP_223870633.1	GenBank	154	184	SASRAAVPRPSGAERSIIGSRIHTTPTRRP	SW	0	1	id_50_9066
BKP1_001816	tr|A0A8D9SHW0|A0A8D9SHW0_BURPB Uncharacterized protein OS=Burkholderia pseudomallei (strain 1106b) OX=357347 GN=BURPS1106B_A3227 PE=4 SV=1_0077	A0A8D9SHW0	Uniprot	4	34	REHAAKARGAPAIGGDRWRTSAGAVAAGIS	SC	0	0	id_50_9066
BKP1_001817	WP_259643201.1 hypothetical protein [Burkholderia pseudomallei]_0077	WP_259643201.1	GenBank	131	161	RAAVPRPSRAERSIIGSRVHTTPTRRPPAV	SC	0	0	id_50_9066
BKP1_001818	WP_270956752.1 SR protein factor [Burkholderia pseudomallei]_0195	WP_270956752.1	GenBank	162	192	RRLADSPIHRFTDLPIYRFTDLPIYRFASA	SC	0	0	id_50_9066
BKP1_001819	WP_264258290.1 hypothetical protein [Burkholderia pseudomallei]_0117	WP_264258290.1	GenBank	18	48	GEGARRAGDRRRLVAGIGGHWRALVGAVAA	SC	0	0	id_50_9066
BKP1_001820	WP_259675144.1 hypothetical protein [Burkholderia pseudomallei]_0123	WP_259675144.1	GenBank	82	112	ADEPTSRRADTPTSRRADEPTSRHADGSTV	SC	0	0	id_50_9066
BKP1_001821	WP_264258290.1 hypothetical protein [Burkholderia pseudomallei]_0099	WP_264258290.1	GenBank	64	94	LGALHSSGVRVLLDDTPTRRHADGSTVPSV	SC	0	0	id_50_9066
BKP1_001822	tr|A0A7V8I5W3|A0A7V8I5W3_BURPE Uncharacterized protein OS=Burkholderia pseudomallei OX=28450 GN=DP49_5063 PE=4 SV=1_0076	A0A7V8I5W3	Uniprot	5	35	RWRLSLPLVLLSRREHAAKARGALAIGGDR	SC	0	0	id_50_9066
BKP1_001823	tr|A0A7V8I5W3|A0A7V8I5W3_BURPE Uncharacterized protein OS=Burkholderia pseudomallei OX=28450 GN=DP49_5063 PE=4 SV=1_0062	A0A7V8I5W3	Uniprot	208	238	RSIIGSRIHTTPTRRPSAVARPFEAARRRR	SC	0	0	id_50_9066
BKP1_001824	tr|A0A7V8I5W3|A0A7V8I5W3_BURPE Uncharacterized protein OS=Burkholderia pseudomallei OX=28450 GN=DP49_5063 PE=4 SV=1_0042	A0A7V8I5W3	Uniprot	120	150	RRADEPTSRHADTPTRRHADTPTRRHADTP	SC	0	0	id_50_9066
BKP1_001825	WP_004521551.1 MULTISPECIES: precorrin-8X methylmutase [Burkholderia]_000_030	WP_004521551.1	GenBank	0	30	MLDYLRDGRAIYRESFATIRAQADLTGVPP	SW	0	0	id_50_11376
BKP1_001826	WP_004521551.1 MULTISPECIES: precorrin-8X methylmutase [Burkholderia]_022_052	WP_004521551.1	GenBank	22	52	ADLTGVPPDLEKLAVRVIHASGMVDIVRDL	SW	0	0	id_50_11376
BKP1_001827	WP_004521551.1 MULTISPECIES: precorrin-8X methylmutase [Burkholderia]_044_074	WP_004521551.1	GenBank	44	74	MVDIVRDLRFSAGAGEAGRAALAAGAPILS	SW	0	1	id_50_11376
BKP1_001828	WP_004521551.1 MULTISPECIES: precorrin-8X methylmutase [Burkholderia]_066_096	WP_004521551.1	GenBank	66	96	AAGAPILCDARMVAEGITRARLPASNPVIC	SW	2	2	id_50_11376
BKP1_001829	WP_004521551.1 MULTISPECIES: precorrin-8X methylmutase [Burkholderia]_088_118	WP_004521551.1	GenBank	88	118	PASNPVISTLGDPEVPHLARELGNTRSAAA	SW	0	1	id_50_11376
BKP1_001830	WP_004521551.1 MULTISPECIES: precorrin-8X methylmutase [Burkholderia]_110_140	WP_004521551.1	GenBank	110	140	GNTRSAAALELWRAHLAGSVVAIGNAPTAL	SW	0	0	id_50_11376
BKP1_001831	WP_004521551.1 MULTISPECIES: precorrin-8X methylmutase [Burkholderia]_132_162	WP_004521551.1	GenBank	132	162	IGNAPTALFHLLDMIDAGAPRPALILGFPV	SW	0	0	id_50_11376
BKP1_001832	WP_004521551.1 MULTISPECIES: precorrin-8X methylmutase [Burkholderia]_154_184	WP_004521551.1	GenBank	154	184	ALILGFPVGFVGAAESKALLAADSRGVPFV	SW	0	0	id_50_11376
BKP1_001833	WP_004521551.1 MULTISPECIES: precorrin-8X methylmutase [Burkholderia]_178_208	WP_004521551.1	GenBank	178	208	RGVPFVAIAGRRGGSAMAAAAVNALASEAE	SW	0	0	id_50_11376
BKP1_001834	WP_038757875.1 precorrin-8X methylmutase [Burkholderia pseudomallei]_0116	WP_038757875.1	GenBank	97	127	LGAPEVPHLARELGNTRSAAAIELWRAHLA	SC	0	0	id_50_11376
BKP1_001835	WP_179101081.1 precorrin-8X methylmutase, partial [Burkholderia pseudomallei]_0000	WP_179101081.1	GenBank	0	30	PAGAAPRPGAAGRRGGSAIAAAAVNALASE	SC	0	0	id_50_11376
BKP1_001836	WP_160446792.1 precorrin-8X methylmutase [Burkholderia pseudomallei]_0023	WP_160446792.1	GenBank	0	30	MLDSLRDGRAISRDSSATTRAQADLTGVPP	SC	0	0	id_50_11376
BKP1_001837	WP_085512652.1 precorrin-8X methylmutase [Burkholderia pseudomallei]_0082	WP_085512652.1	GenBank	5	35	RDGRAIYRESFATIRAQTDLTGVPPDLEKL	SC	0	0	id_50_11376
BKP1_001838	WP_038725700.1 precorrin-8X methylmutase [Burkholderia pseudomallei]_0168	WP_038725700.1	GenBank	162	192	GFVGAAESKALLAAGSRGVPFVAIAGRRGG	SC	0	0	id_50_11376
BKP1_001839	WP_038726667.1 hypothetical protein [Burkholderia pseudomallei]_000_030	WP_038726667.1	GenBank	0	30	MARPLYRIRQFAQSRVRGGKLFCADACQVQ	SW	2	2	id_50_19381
BKP1_001840	WP_038726667.1 hypothetical protein [Burkholderia pseudomallei]_022_052	WP_038726667.1	GenBank	22	52	CADACQVQQRVAGLFWLEIAYCSDRTGAEA	SW	3	3	id_50_19381
BKP1_001841	WP_057038774.1 hypothetical protein [Burkholderia pseudomallei]_0009	WP_057038774.1	GenBank	0	30	MARPMYRIRQIAQSRVRNGALFHPGAHQVQ	SC	0	0	id_50_19381
BKP1_001842	WP_057038774.1 hypothetical protein [Burkholderia pseudomallei]_0001	WP_057038774.1	GenBank	44	74	SDRFDAEAAIQRDVFARRAARIKPRVLGLF	SC	0	0	id_50_19381
BKP1_001843	WP_122762293.1 hypothetical protein [Burkholderia pseudomallei]_0032	WP_122762293.1	GenBank	13	43	SRVRNGALSHPGAHQVQRRVAVLFWREIAY	SC	0	0	id_50_19381
BKP1_001844	WP_028201154.1 hypothetical protein [Burkholderia pseudomallei]_0049	WP_028201154.1	GenBank	9	39	QIAQSRVRGGKLFFAGAHQVQQRIAGLFWR	SC	0	0	id_50_19381
BKP1_001845	WP_044368026.1 MULTISPECIES: hypothetical protein [pseudomallei group]_0012	WP_044368026.1	GenBank	2	32	RPMYRIRQFARSRVYLGQLYQPGAYQVQRR	SC	0	0	id_50_19381
BKP1_001846	WP_038799572.1 hypothetical protein [Burkholderia pseudomallei]_0036	WP_038799572.1	GenBank	53	83	IRAAVIAHRRARLKPRVLGLFGRDGQALGQ	SC	0	0	id_50_19381
BKP1_001847	WP_044368026.1 MULTISPECIES: hypothetical protein [pseudomallei group]_0009	WP_044368026.1	GenBank	46	76	RSEAEAAIRGDVLARRVARIKPRVRGVFGR	SC	0	0	id_50_19381
BKP1_001848	WP_028201154.1 hypothetical protein [Burkholderia pseudomallei]_0050	WP_028201154.1	GenBank	45	75	DRTGAEAAIQADAIARRRARIMPRVLGLFD	SC	0	0	id_50_19381
BKP1_001849	WP_264260263.1 hypothetical protein [Burkholderia pseudomallei]_0000	WP_264260263.1	GenBank	44	74	SKRFDAEAAIRADVLARRRARIKPRVLGLF	SC	0	0	id_50_19381
BKP1_001850	WP_004551072.1 hypothetical protein [Burkholderia pseudomallei]_0037	WP_004551072.1	GenBank	50	80	EAAIRAAVTAHRRARLKPRVLDLFDRDGQA	SC	0	0	id_50_19381
BKP1_001851	WP_122883739.1 hypothetical protein [Burkholderia pseudomallei]_0005	WP_122883739.1	GenBank	12	42	QPRVRGGTLFFAGAFQVQRRIAILFWREIT	SC	0	0	id_50_19381
BKP1_001852	WP_057038774.1 hypothetical protein [Burkholderia pseudomallei]_0025	WP_057038774.1	GenBank	53	83	IQRDVFARRAARIKPRVLGLFDRAGQALGK	SC	0	0	id_50_19381
BKP1_001853	WP_172848153.1 hypothetical protein [Burkholderia pseudomallei]_0006	WP_172848153.1	GenBank	7	37	IRQLAQSRVLNGKLYFAGGHQAQRRVAVLF	SC	0	0	id_50_19381
BKP1_001854	WP_025405651.1 hypothetical protein [Burkholderia pseudomallei]_0000	WP_025405651.1	GenBank	48	78	GAEAAIRADAIARRRMRIKPRVLGLFDREG	SC	0	0	id_50_19381
BKP1_001855	WP_242686123.1 hypothetical protein [Burkholderia pseudomallei]_0032	WP_242686123.1	GenBank	0	30	MYHLTHADVTEKYRGYDSQVQQRVAGLFWL	SC	0	0	id_50_19381
BKP1_001856	WP_009969798.1 hypothetical protein [Burkholderia pseudomallei]_0024	WP_009969798.1	GenBank	13	43	SRVRGGKLFFAGAFQVQQRIAGLFWREIAY	SC	0	0	id_50_19381
BKP1_001857	WP_172847675.1 hypothetical protein [Burkholderia pseudomallei]_0029	WP_172847675.1	GenBank	7	37	IRQIAQSRVRGGTLFHPGAFQVQRRVAVLF	SC	0	0	id_50_19381
BKP1_001858	WP_044368026.1 MULTISPECIES: hypothetical protein [pseudomallei group]_0017	WP_044368026.1	GenBank	53	83	IRGDVLARRVARIKPRVRGVFGRDGQELTK	SC	0	0	id_50_19381
BKP1_001859	WP_076926491.1 hypothetical protein [Burkholderia pseudomallei]_0021	WP_076926491.1	GenBank	53	83	IRAAVIARRRARLKPRLLGLFGRGGQALGQ	SC	0	0	id_50_19381
BKP1_001860	WP_264260263.1 hypothetical protein [Burkholderia pseudomallei]_0008	WP_264260263.1	GenBank	4	34	MYRIRQIAQSRVHNATLFHPGAHQVQRRVA	SC	0	0	id_50_19381
BKP1_001861	WP_122883739.1 hypothetical protein [Burkholderia pseudomallei]_0048	WP_122883739.1	GenBank	44	74	SDRVGAEAAIRADVIARRRARIKPRVLGLF	SC	0	0	id_50_19381
BKP1_001862	WP_172847675.1 hypothetical protein [Burkholderia pseudomallei]_0005	WP_172847675.1	GenBank	44	74	SDRIGAEAAIRAAVIARRRARFKPRVLGLF	SC	0	0	id_50_19381
BKP1_001863	WP_050042443.1 MULTISPECIES: hypothetical protein [pseudomallei group]_0031	WP_050042443.1	GenBank	13	43	SRVYLGQLYQPGAYQVQRRVAVLFWGEIAY	SC	0	0	id_50_19381
BKP1_001864	WP_122829708.1 hypothetical protein [Burkholderia pseudomallei]_0033	WP_122829708.1	GenBank	4	34	LYRIRQFAQSRVRNGTLFHPGAHQVQRRVA	SC	0	0	id_50_19381
BKP1_001865	WP_076830973.1 hypothetical protein [Burkholderia pseudomallei]_0012	WP_076830973.1	GenBank	46	76	RTGAEAAIRAAVIARRRARLKLRVLGLFDR	SC	0	0	id_50_19381
BKP1_001866	WP_038729272.1 hypothetical protein [Burkholderia pseudomallei]_0015	WP_038729272.1	GenBank	51	81	AAIRAAVIARRRAWLKPRVLGLFDRDGQAL	SC	0	0	id_50_19381
BKP1_001867	WP_038718261.1 hypothetical protein [Burkholderia pseudomallei]_0038	WP_038718261.1	GenBank	50	80	EAAIRAAVIARWRARLKPRVLGLFDRDGQA	SC	0	0	id_50_19381
BKP1_001868	WP_004190982.1 MULTISPECIES: peptide ABC transporter substrate-binding protein [Burkholderia]_000_030	WP_004190982.1	GenBank	0	30	MRRALPFRYHYQSHTMKHTHAFAAVLAALA	SW	0	0	id_50_2643
BKP1_001869	WP_004190982.1 MULTISPECIES: peptide ABC transporter substrate-binding protein [Burkholderia]_022_052	WP_004190982.1	GenBank	22	52	AAVLAALALTIAPSAPAVTVASNVTLADQQ	SW	0	0	id_50_2643
BKP1_001870	WP_004190982.1 MULTISPECIES: peptide ABC transporter substrate-binding protein [Burkholderia]_044_074	WP_004190982.1	GenBank	44	74	NVTLADQQDLTRQVPAEVESLDPAHIESWT	SW	0	0	id_50_2643
BKP1_001871	WP_004190982.1 MULTISPECIES: peptide ABC transporter substrate-binding protein [Burkholderia]_066_096	WP_004190982.1	GenBank	66	96	PAHIESWTGNTIGLDLFEGLARIDASGAVV	SW	0	0	id_50_2643
BKP1_001872	WP_004190982.1 MULTISPECIES: peptide ABC transporter substrate-binding protein [Burkholderia]_088_118	WP_004190982.1	GenBank	88	118	IDASGAVVPGVAQAWEHKAPDTWIFKLRRD	SW	0	0	id_50_2643
BKP1_001873	WP_004190982.1 MULTISPECIES: peptide ABC transporter substrate-binding protein [Burkholderia]_110_140	WP_004190982.1	GenBank	110	140	WIFKLRRDAKWSNGQPVTAADFVYAWQRLA	SW	0	0	id_50_2643
BKP1_001874	WP_004190982.1 MULTISPECIES: peptide ABC transporter substrate-binding protein [Burkholderia]_132_162	WP_004190982.1	GenBank	132	162	VYAWQRLADPKTGSKYTILVEFVKNASAII	SW	0	0	id_50_2643
BKP1_001875	WP_004190982.1 MULTISPECIES: peptide ABC transporter substrate-binding protein [Burkholderia]_154_184	WP_004190982.1	GenBank	154	184	VKNASAIIAGKQPPGDLGIRAIDPYTIEVK	SW	0	0	id_50_2643
BKP1_001876	WP_004190982.1 MULTISPECIES: peptide ABC transporter substrate-binding protein [Burkholderia]_176_206	WP_004190982.1	GenBank	176	206	DPYTIEVKTEVPVSYFPELTAMAPLTPVNK	SW	0	0	id_50_2643
BKP1_001877	WP_004190982.1 MULTISPECIES: peptide ABC transporter substrate-binding protein [Burkholderia]_198_228	WP_004190982.1	GenBank	198	228	APLTPVNKDAVAKFGDAWTRPKNIVSNGPY	SW	0	0	id_50_2643
BKP1_001878	WP_004190982.1 MULTISPECIES: peptide ABC transporter substrate-binding protein [Burkholderia]_220_250	WP_004190982.1	GenBank	220	250	NIVSNGPYTLVDWQPNNRIVMAKSDKYWNA	SW	0	0	id_50_2643
BKP1_001879	WP_004190982.1 MULTISPECIES: peptide ABC transporter substrate-binding protein [Burkholderia]_242_272	WP_004190982.1	GenBank	242	272	KSDKYWNARNVVIRKVTYLPIENDETALRM	SW	0	0	id_50_2643
BKP1_001880	WP_004190982.1 MULTISPECIES: peptide ABC transporter substrate-binding protein [Burkholderia]_264_294	WP_004190982.1	GenBank	264	294	NDETALRMYQAGQIDYTYSIPAGGFGQISK	SW	0	0	id_50_2643
BKP1_001881	WP_004190982.1 MULTISPECIES: peptide ABC transporter substrate-binding protein [Burkholderia]_286_316	WP_004190982.1	GenBank	286	316	GGFGQISKQFGKELRPGLQLATYYYYLKNS	SW	0	0	id_50_2643
BKP1_001882	WP_004190982.1 MULTISPECIES: peptide ABC transporter substrate-binding protein [Burkholderia]_308_338	WP_004190982.1	GenBank	308	338	YYYYLKNSDPALKDKRVREALAMVLDREIL	SW	0	0	id_50_2643
BKP1_001883	WP_004190982.1 MULTISPECIES: peptide ABC transporter substrate-binding protein [Burkholderia]_330_360	WP_004190982.1	GenBank	330	360	MVLDREILTSKITQAGEVPMYGLMPKGVKG	SW	0	0	id_50_2643
BKP1_001884	WP_004190982.1 MULTISPECIES: peptide ABC transporter substrate-binding protein [Burkholderia]_352_382	WP_004190982.1	GenBank	352	382	LMPKGVKGVQRPFTPDWASWPMARRVDYAK	SW	0	0	id_50_2643
BKP1_001885	WP_004190982.1 MULTISPECIES: peptide ABC transporter substrate-binding protein [Burkholderia]_374_404	WP_004190982.1	GenBank	374	404	ARRVDYAKNLLKQAGHGDANPLTFTLTYNT	SW	0	0	id_50_2643
BKP1_001886	WP_004190982.1 MULTISPECIES: peptide ABC transporter substrate-binding protein [Burkholderia]_396_426	WP_004190982.1	GenBank	396	426	TFTLTYNTNDLHKKVALFAASEWRTKLGVT	SW	0	0	id_50_2643
BKP1_001887	WP_004190982.1 MULTISPECIES: peptide ABC transporter substrate-binding protein [Burkholderia]_418_448	WP_004190982.1	GenBank	418	448	WRTKLGVTAKLENVEFKVLMKQRHDGKVQV	SW	0	0	id_50_2643
BKP1_001888	WP_004190982.1 MULTISPECIES: peptide ABC transporter substrate-binding protein [Burkholderia]_440_470	WP_004190982.1	GenBank	440	470	RHDGKVQVARDGWFADYNDAMTFFDLIRSG	SW	0	0	id_50_2643
BKP1_001889	WP_004190982.1 MULTISPECIES: peptide ABC transporter substrate-binding protein [Burkholderia]_462_492	WP_004190982.1	GenBank	462	492	FFDLIRCGSSQNTVGYCNPKVDSLVAEANQ	SW	2	2	id_50_2643
BKP1_001890	WP_004190982.1 MULTISPECIES: peptide ABC transporter substrate-binding protein [Burkholderia]_484_514	WP_004190982.1	GenBank	484	514	SLVAEANQKLDDGARAALLTQAHDLAMNDY	SW	0	0	id_50_2643
BKP1_001891	WP_004190982.1 MULTISPECIES: peptide ABC transporter substrate-binding protein [Burkholderia]_506_536	WP_004190982.1	GenBank	506	536	HDLAMNDYPMVPLFQYSADRLVKSYVGGYT	SW	0	0	id_50_2643
BKP1_001892	WP_004190982.1 MULTISPECIES: peptide ABC transporter substrate-binding protein [Burkholderia]_524_554	WP_004190982.1	GenBank	524	554	DRLVKSYVGGYTLTNYIDMRASQDMYLIKH	SW	0	0	id_50_2643
BKP1_001893	tr|Q3JHT5|Q3JHT5_BURP1 Quinone reductase OS=Burkholderia pseudomallei (strain 1710b) OX=320372 GN=BURPS1710b_A1711 PE=4 SV=1_000_030	Q3JHT5	Uniprot	0	30	MQYLEYWKSISNIPEQPITSVHLSSQSIDS	SW	0	1	id_50_8196
BKP1_001894	tr|Q3JHT5|Q3JHT5_BURP1 Quinone reductase OS=Burkholderia pseudomallei (strain 1710b) OX=320372 GN=BURPS1710b_A1711 PE=4 SV=1_022_052	Q3JHT5	Uniprot	22	52	LSSQSIDSPDMNVLLVYAHPEPKSLNGSLK	SW	0	0	id_50_8196
BKP1_001895	tr|Q3JHT5|Q3JHT5_BURP1 Quinone reductase OS=Burkholderia pseudomallei (strain 1710b) OX=320372 GN=BURPS1710b_A1711 PE=4 SV=1_044_074	Q3JHT5	Uniprot	44	74	KSLNGSLKNFALRHLEEAGHAVQVSDLYAM	SW	0	0	id_50_8196
BKP1_001896	tr|Q3JHT5|Q3JHT5_BURP1 Quinone reductase OS=Burkholderia pseudomallei (strain 1710b) OX=320372 GN=BURPS1710b_A1711 PE=4 SV=1_066_096	Q3JHT5	Uniprot	66	96	QVSDLYAMQWKAALDADDNTARRPDTRFDP	SW	0	0	id_50_8196
BKP1_001897	tr|Q3JHT5|Q3JHT5_BURP1 Quinone reductase OS=Burkholderia pseudomallei (strain 1710b) OX=320372 GN=BURPS1710b_A1711 PE=4 SV=1_088_118	Q3JHT5	Uniprot	88	118	RPDTRFDPSLDSKHAFENGTQAADIAREQD	SW	0	0	id_50_8196
BKP1_001898	tr|Q3JHT5|Q3JHT5_BURP1 Quinone reductase OS=Burkholderia pseudomallei (strain 1710b) OX=320372 GN=BURPS1710b_A1711 PE=4 SV=1_110_140	Q3JHT5	Uniprot	110	140	ADIAREQDKLRWADALVLQFPLWWFSMPAI	SW	0	0	id_50_8196
BKP1_001899	tr|Q3JHT5|Q3JHT5_BURP1 Quinone reductase OS=Burkholderia pseudomallei (strain 1710b) OX=320372 GN=BURPS1710b_A1711 PE=4 SV=1_132_162	Q3JHT5	Uniprot	132	162	WWFSMPAILKGWVERVYAFGFAYGVGEHSD	SW	0	0	id_50_8196
BKP1_001900	tr|Q3JHT5|Q3JHT5_BURP1 Quinone reductase OS=Burkholderia pseudomallei (strain 1710b) OX=320372 GN=BURPS1710b_A1711 PE=4 SV=1_154_184	Q3JHT5	Uniprot	154	184	YGVGEHSDTHWGDRYGEGSMKGKRAMLIVT	SW	0	0	id_50_8196
BKP1_001901	tr|Q3JHT5|Q3JHT5_BURP1 Quinone reductase OS=Burkholderia pseudomallei (strain 1710b) OX=320372 GN=BURPS1710b_A1711 PE=4 SV=1_176_206	Q3JHT5	Uniprot	176	206	KRAMLIVTTGGWASHYGPRGINGPIDDLLY	SW	0	0	id_50_8196
BKP1_001902	tr|Q3JHT5|Q3JHT5_BURP1 Quinone reductase OS=Burkholderia pseudomallei (strain 1710b) OX=320372 GN=BURPS1710b_A1711 PE=4 SV=1_198_228	Q3JHT5	Uniprot	198	228	GPIDDLLYPIHHGILYYPGFDVLPPFLVHR	SW	0	0	id_50_8196
BKP1_001903	tr|Q3JHT5|Q3JHT5_BURP1 Quinone reductase OS=Burkholderia pseudomallei (strain 1710b) OX=320372 GN=BURPS1710b_A1711 PE=4 SV=1_220_250	Q3JHT5	Uniprot	220	250	LPPFLVHRTNRIDETRFATIRDALGQRLDT	SW	0	0	id_50_8196
BKP1_001904	tr|Q3JHT5|Q3JHT5_BURP1 Quinone reductase OS=Burkholderia pseudomallei (strain 1710b) OX=320372 GN=BURPS1710b_A1711 PE=4 SV=1_242_272	Q3JHT5	Uniprot	242	272	ALGQRLDTLWTTAPIAFRAQNAGDYEIPQL	SW	0	0	id_50_8196
BKP1_001905	tr|Q3JHT5|Q3JHT5_BURP1 Quinone reductase OS=Burkholderia pseudomallei (strain 1710b) OX=320372 GN=BURPS1710b_A1711 PE=4 SV=1_260_290	Q3JHT5	Uniprot	260	290	AQNAGDYEIPQLTLRADIAPGRSGFAAHIA	SW	0	0	id_50_8196
BKP1_001906	WP_004194775.1 MULTISPECIES: DUF3311 domain-containing protein [Burkholderia]_000_030	WP_004194775.1	GenBank	0	30	MAHDADANRAAKRWLWLLVLPLVAMVWVPS	SW	0	0	id_50_20531
BKP1_001907	WP_004194775.1 MULTISPECIES: DUF3311 domain-containing protein [Burkholderia]_022_052	WP_004194775.1	GenBank	22	52	VAMVWVPSYNRTEPQWFGFPFFYWYQLLWV	SW	0	0	id_50_20531
BKP1_001908	WP_004194775.1 MULTISPECIES: DUF3311 domain-containing protein [Burkholderia]_044_074	WP_004194775.1	GenBank	44	74	YWYQLLWVFVSAVITAFVYQKTKHSWKGVP	SW	0	1	id_50_20531
BKP1_001909	WP_004194775.1 MULTISPECIES: DUF3311 domain-containing protein [Burkholderia]_049_079	WP_004194775.1	GenBank	49	79	LWVFVSAVITAFVYQKTKHSWKGVPRGDGK	SW	0	1	id_50_20531
BKP1_001910	WP_017882027.1 MULTISPECIES: DUF3311 domain-containing protein [Burkholderia]_0006	WP_017882027.1	GenBank	37	67	WFGFPFFYWYQLLWLFVSAVITAFVYQKTK	SC	0	0	id_50_20531
BKP1_001911	WP_085560979.1 type VI secretion system baseplate subunit TssF [Burkholderia pseudomallei]_000_030	WP_085560979.1	GenBank	0	30	MDHLLPHYERELSLLRRSVALFATRYPKIA	SW	0	0	id_50_2036
BKP1_001912	WP_085560979.1 type VI secretion system baseplate subunit TssF [Burkholderia pseudomallei]_022_052	WP_085560979.1	GenBank	22	52	ATRYPKIAVRLGISGDRSEDPHVERMLQSF	SW	0	0	id_50_2036
BKP1_001913	WP_085560979.1 type VI secretion system baseplate subunit TssF [Burkholderia pseudomallei]_044_074	WP_085560979.1	GenBank	44	74	VERMLQSFALLAADIGSRLDDNYPQFAEAL	SW	0	0	id_50_2036
BKP1_001914	WP_085560979.1 type VI secretion system baseplate subunit TssF [Burkholderia pseudomallei]_066_096	WP_085560979.1	GenBank	66	96	YPQFAEALLGMLYPQYLRTVPASAIAQFDV	SW	0	0	id_50_2036
BKP1_001915	WP_085560979.1 type VI secretion system baseplate subunit TssF [Burkholderia pseudomallei]_088_118	WP_085560979.1	GenBank	88	118	SAIAQFDVSDMFEKLTEPSLIALGTELASK	SW	0	1	id_50_2036
BKP1_001916	WP_085560979.1 type VI secretion system baseplate subunit TssF [Burkholderia pseudomallei]_110_140	WP_085560979.1	GenBank	110	140	LGTELASKTEDSLFRTVYDVTLAPVRISTA	SW	0	1	id_50_2036
BKP1_001917	WP_085560979.1 type VI secretion system baseplate subunit TssF [Burkholderia pseudomallei]_154_184	WP_085560979.1	GenBank	154	184	PAGTTGLLSITFAVARPDFRIEAVPSPLRI	SW	0	0	id_50_2036
BKP1_001918	WP_085560979.1 type VI secretion system baseplate subunit TssF [Burkholderia pseudomallei]_176_206	WP_085560979.1	GenBank	176	206	AVPSPLRIHVSGPREVVGAAMDTMTMHTTA	SW	0	0	id_50_2036
BKP1_001919	WP_085560979.1 type VI secretion system baseplate subunit TssF [Burkholderia pseudomallei]_198_228	WP_085560979.1	GenBank	198	228	TMTMHTTAAFVENAERRWSTLTTPPLAAAG	SW	0	0	id_50_2036
BKP1_001920	WP_085560979.1 type VI secretion system baseplate subunit TssF [Burkholderia pseudomallei]_220_250	WP_085560979.1	GenBank	220	250	TPPLAAAGYDEAEKLLAEDDGPPALRLLSE	SW	0	0	id_50_2036
BKP1_001921	WP_085560979.1 type VI secretion system baseplate subunit TssF [Burkholderia pseudomallei]_242_272	WP_085560979.1	GenBank	242	272	PALRLLSEYFAFPKKFDFVDVDLAALAHTA	SW	0	0	id_50_2036
BKP1_001922	WP_085560979.1 type VI secretion system baseplate subunit TssF [Burkholderia pseudomallei]_264_294	WP_085560979.1	GenBank	264	294	LAALAHTAGSSQQLTLHLAISGVHPDSWTA	SW	0	1	id_50_2036
BKP1_001923	WP_085560979.1 type VI secretion system baseplate subunit TssF [Burkholderia pseudomallei]_286_316	WP_085560979.1	GenBank	286	316	VHPDSWTAQRLKSLSADNLKLFSTPIVNLF	SW	0	1	id_50_2036
BKP1_001924	WP_085560979.1 type VI secretion system baseplate subunit TssF [Burkholderia pseudomallei]_308_338	WP_085560979.1	GenBank	308	338	STPIVNLFRLTSLPLKRNPIANTYPVQSQN	SW	0	1	id_50_2036
BKP1_001925	WP_085560979.1 type VI secretion system baseplate subunit TssF [Burkholderia pseudomallei]_330_360	WP_085560979.1	GenBank	330	360	TYPVQSQNTDAAGVEVWSVESVRVTTGSSR	SW	0	0	id_50_2036
BKP1_001926	WP_085560979.1 type VI secretion system baseplate subunit TssF [Burkholderia pseudomallei]_352_382	WP_085560979.1	GenBank	352	382	RVTTGSSRANIIHPFVSLMHGSSGKPAGPY	SW	0	0	id_50_2036
BKP1_001927	WP_085560979.1 type VI secretion system baseplate subunit TssF [Burkholderia pseudomallei]_374_404	WP_085560979.1	GenBank	374	404	SGKPAGPYWVLMHHNAASPSGKKETALSLV	SW	0	0	id_50_2036
BKP1_001928	WP_085560979.1 type VI secretion system baseplate subunit TssF [Burkholderia pseudomallei]_396_426	WP_085560979.1	GenBank	396	426	KETALSLVELDGRPATDTGIEQITADVTSS	SW	0	1	id_50_2036
BKP1_001929	WP_085560979.1 type VI secretion system baseplate subunit TssF [Burkholderia pseudomallei]_418_448	WP_085560979.1	GenBank	418	448	ITADVTSSNGDFPRTIRAGAEDGDLVNEQG	SW	0	1	id_50_2036
BKP1_001930	WP_085560979.1 type VI secretion system baseplate subunit TssF [Burkholderia pseudomallei]_440_470	WP_085560979.1	GenBank	440	470	GDLVNEQGTMVSRIVMLDAPTEVTRLSKEG	SW	0	0	id_50_2036
BKP1_001931	WP_085560979.1 type VI secretion system baseplate subunit TssF [Burkholderia pseudomallei]_462_492	WP_085560979.1	GenBank	462	492	VTRLSKEGDAAWRLITQFAPHSIELTRTGL	SW	0	0	id_50_2036
BKP1_001932	WP_085560979.1 type VI secretion system baseplate subunit TssF [Burkholderia pseudomallei]_484_514	WP_085560979.1	GenBank	484	514	IELTRTGLAELKRLFRQFTAQSAGHAKLLD	SW	0	0	id_50_2036
BKP1_001933	WP_085560979.1 type VI secretion system baseplate subunit TssF [Burkholderia pseudomallei]_506_536	WP_085560979.1	GenBank	506	536	AGHAKLLDGLTNLSHRTKQLWLPGKPMPSF	SW	0	0	id_50_2036
BKP1_001934	WP_085560979.1 type VI secretion system baseplate subunit TssF [Burkholderia pseudomallei]_528_558	WP_085560979.1	GenBank	528	558	PGKPMPSFVRGLEVTLTVDEQAFAAISLNS	SW	0	0	id_50_2036
BKP1_001935	WP_085560979.1 type VI secretion system baseplate subunit TssF [Burkholderia pseudomallei]_550_580	WP_085560979.1	GenBank	550	580	FAAISLNSFIGVMDHFFTVHAPTTSFVQLV	SW	0	0	id_50_2036
BKP1_001936	WP_085560979.1 type VI secretion system baseplate subunit TssF [Burkholderia pseudomallei]_573_603	WP_085560979.1	GenBank	573	603	TSFVQLVVMSANTGREIRRSTPRPGTIPLV	SW	0	1	id_50_2036
BKP1_001937	WP_208204952.1 type VI secretion system baseplate subunit TssF [Burkholderia pseudomallei]_0169	WP_208204952.1	GenBank	319	349	SLPLKRSPITNTYPVQSQNTGVAGVEVWSV	SC	0	0	id_50_2036
BKP1_001938	WP_038776077.1 type VI secretion system baseplate subunit TssF [Burkholderia pseudomallei]_0097	WP_038776077.1	GenBank	47	77	MLQSFALLAADISSRLDDNYPEFAEALLGM	SC	0	0	id_50_2036
BKP1_001939	WP_208204952.1 type VI secretion system baseplate subunit TssF [Burkholderia pseudomallei]_0502	WP_208204952.1	GenBank	165	195	FEVARPDFRIDAVPRPLRIHVNGPREVVGA	SC	0	0	id_50_2036
BKP1_001940	WP_119637453.1 type VI secretion system baseplate subunit TssF [Burkholderia pseudomallei]_0116	WP_119637453.1	GenBank	345	375	VWSVESVRATTGSSRTNIIHPFTSLMHGSS	SC	0	0	id_50_2036
BKP1_001941	WP_208204952.1 type VI secretion system baseplate subunit TssF [Burkholderia pseudomallei]_0301	WP_208204952.1	GenBank	12	42	SLLRRSVAIFATRYPKIAVRLGISGDHSED	SC	0	0	id_50_2036
BKP1_001942	WP_085503858.1 type VI secretion system baseplate subunit TssF [Burkholderia pseudomallei]_0524	WP_085503858.1	GenBank	392	422	PSGKKETALGLVGLDGRPAADTGIEQITAD	SC	0	0	id_50_2036
BKP1_001943	WP_208204952.1 type VI secretion system baseplate subunit TssF [Burkholderia pseudomallei]_0570	WP_208204952.1	GenBank	545	575	VDEQAFAAVSLNAFISVMDHFFAVHAPTTS	SC	0	0	id_50_2036
BKP1_001944	WP_256730684.1 type VI secretion system baseplate subunit TssF [Burkholderia pseudomallei]_0006	WP_256730684.1	GenBank	171	201	TGLLSITFEVTRPDFLIEAIPSPLRIHVNG	SC	0	0	id_50_2036
BKP1_001945	WP_256730684.1 type VI secretion system baseplate subunit TssF [Burkholderia pseudomallei]_0364	WP_256730684.1	GenBank	387	417	SAKPAGPYWVLKQHNAAPLSGKKETALNLV	SC	0	0	id_50_2036
BKP1_001946	WP_208836854.1 type VI secretion system baseplate subunit TssF [Burkholderia pseudomallei]_0550	WP_208836854.1	GenBank	215	245	WSTLITPPLAAVGYDEAEKLLDEDDGPPAL	SC	0	0	id_50_2036
BKP1_001947	WP_208204952.1 type VI secretion system baseplate subunit TssF [Burkholderia pseudomallei]_0108	WP_208204952.1	GenBank	249	279	EYFAFPKKFDFVDIDLAALAHAAGSSQQLT	SC	0	0	id_50_2036
BKP1_001948	WP_256730684.1 type VI secretion system baseplate subunit TssF [Burkholderia pseudomallei]_0445	WP_256730684.1	GenBank	236	266	LTAAGFDGAEKLIDEDDGSPALRLLTEYFA	SC	0	0	id_50_2036
BKP1_001949	WP_256730684.1 type VI secretion system baseplate subunit TssF [Burkholderia pseudomallei]_0420	WP_256730684.1	GenBank	198	228	VNGTREVVGATMDTMTMRATAAFVESSDRR	SC	0	0	id_50_2036
BKP1_001950	WP_256730684.1 type VI secretion system baseplate subunit TssF [Burkholderia pseudomallei]_0070	WP_256730684.1	GenBank	104	134	AQFDVLDMFDKLTEPSPIARGTELTSKVGD	SC	0	0	id_50_2036
BKP1_001951	WP_256730684.1 type VI secretion system baseplate subunit TssF [Burkholderia pseudomallei]_0294	WP_256730684.1	GenBank	459	489	QGTMVSRIEMLDAPTEVARLSGESDAAWRL	SC	0	0	id_50_2036
BKP1_001952	WP_256730684.1 type VI secretion system baseplate subunit TssF [Burkholderia pseudomallei]_0121	WP_256730684.1	GenBank	550	580	RGLEVTLTIDEQAFAAANLSTFIVVMDHFF	SC	0	0	id_50_2036
BKP1_001953	WP_256730684.1 type VI secretion system baseplate subunit TssF [Burkholderia pseudomallei]_0439	WP_256730684.1	GenBank	484	514	AAWRLITQLAPHTIELTRTGLVELKRLFRQ	SC	0	0	id_50_2036
BKP1_001954	WP_208836854.1 type VI secretion system baseplate subunit TssF [Burkholderia pseudomallei]_0539	WP_208836854.1	GenBank	194	224	AAMDTMTMHTAAAFVENAERRWSTLITPPL	SC	0	0	id_50_2036
BKP1_001955	WP_038788424.1 type VI secretion system baseplate subunit TssF [Burkholderia pseudomallei]_0447	WP_038788424.1	GenBank	341	371	AGVEIWSVDAVRTTTGGSRANVIHPFTSLM	SC	0	0	id_50_2036
BKP1_001956	WP_208836854.1 type VI secretion system baseplate subunit TssF [Burkholderia pseudomallei]_0118	WP_208836854.1	GenBank	394	424	GKKETALNLVDLEGRPTIGTVIEQITADVI	SC	0	0	id_50_2036
BKP1_001957	WP_208836854.1 type VI secretion system baseplate subunit TssF [Burkholderia pseudomallei]_0041	WP_208836854.1	GenBank	501	531	FTSYSAIHTKLVDGLTDLSHRAKQLWLPGK	SC	0	0	id_50_2036
BKP1_001958	WP_119637453.1 type VI secretion system baseplate subunit TssF [Burkholderia pseudomallei]_0167	WP_119637453.1	GenBank	487	517	TRTGLAELKRLFHQFAPHSAGHAKLLDGLT	SC	0	0	id_50_2036
BKP1_001959	WP_256730684.1 type VI secretion system baseplate subunit TssF [Burkholderia pseudomallei]_0322	WP_256730684.1	GenBank	267	297	PKKFDFVDVDFAALAHVAGSGQQLTLHLAI	SC	0	0	id_50_2036
BKP1_001960	WP_256730684.1 type VI secretion system baseplate subunit TssF [Burkholderia pseudomallei]_0126	WP_256730684.1	GenBank	509	539	RLFRQFAAQSAGHANLLDGLTNLSHRIKRL	SC	0	0	id_50_2036
BKP1_001961	WP_256730684.1 type VI secretion system baseplate subunit TssF [Burkholderia pseudomallei]_0195	WP_256730684.1	GenBank	16	46	LLPHYERELALLRRSIGTFSTRYPKIAVRL	SC	0	0	id_50_2036
BKP1_001962	WP_038776077.1 type VI secretion system baseplate subunit TssF [Burkholderia pseudomallei]_0410	WP_038776077.1	GenBank	353	383	RATTSSSRASIIHPFVSPMHGSSAKPAGPY	SC	0	0	id_50_2036
BKP1_001963	WP_038776077.1 type VI secretion system baseplate subunit TssF [Burkholderia pseudomallei]_0284	WP_038776077.1	GenBank	129	159	VTLAPVRISAARYAPATAVPSDVVLPAGTT	SC	0	0	id_50_2036
BKP1_001964	WP_038776077.1 type VI secretion system baseplate subunit TssF [Burkholderia pseudomallei]_0415	WP_038776077.1	GenBank	426	456	SNGNFPRTMRAGAEDGDLVNEQGTMVSRIV	SC	0	0	id_50_2036
BKP1_001965	WP_038776077.1 type VI secretion system baseplate subunit TssF [Burkholderia pseudomallei]_0211	WP_038776077.1	GenBank	181	211	LRIHVNGLREVVAAAMDTMTMRTAAAFVEN	SC	0	0	id_50_2036
BKP1_001966	WP_208836854.1 type VI secretion system baseplate subunit TssF [Burkholderia pseudomallei]_0361	WP_208836854.1	GenBank	447	477	GTMVSRIVILNAPTEIVRLSSEGDAAWRLI	SC	0	0	id_50_2036
BKP1_001967	WP_256730684.1 type VI secretion system baseplate subunit TssF [Burkholderia pseudomallei]_0382	WP_256730684.1	GenBank	220	250	FVESSDRRWATLAASPLTAAGFDGAEKLID	SC	0	0	id_50_2036
BKP1_001968	WP_208836854.1 type VI secretion system baseplate subunit TssF [Burkholderia pseudomallei]_0427	WP_208836854.1	GenBank	343	373	VEVWSVESVRAMTGSSGANIIHPFVSLMHG	SC	0	0	id_50_2036
BKP1_001969	WP_256730684.1 type VI secretion system baseplate subunit TssF [Burkholderia pseudomallei]_0167	WP_256730684.1	GenBank	154	184	YASASAAPSDVVLPHGTTGLLSITFEVTRP	SC	0	0	id_50_2036
BKP1_001970	WP_256730684.1 type VI secretion system baseplate subunit TssF [Burkholderia pseudomallei]_0186	WP_256730684.1	GenBank	407	437	GKKETALNLVGLDGRPATDTGIEQVTADVS	SC	0	0	id_50_2036
BKP1_001971	WP_038776077.1 type VI secretion system baseplate subunit TssF [Burkholderia pseudomallei]_0514	WP_038776077.1	GenBank	331	361	TYPVQSQNTDVASVEVWSIESVRATTSSSR	SC	0	0	id_50_2036
BKP1_001972	WP_119637453.1 type VI secretion system baseplate subunit TssF [Burkholderia pseudomallei]_0429	WP_119637453.1	GenBank	157	187	TTGLLSITFTVAHPDFRIEALPSPLRIHVS	SC	0	0	id_50_2036
BKP1_001973	WP_038788424.1 type VI secretion system baseplate subunit TssF [Burkholderia pseudomallei]_0245	WP_038788424.1	GenBank	320	350	LPLKRNPITDTYPVQSQNTDAAGVEIWSVD	SC	0	0	id_50_2036
BKP1_001974	WP_256730684.1 type VI secretion system baseplate subunit TssF [Burkholderia pseudomallei]_0379	WP_256730684.1	GenBank	524	554	LLDGLTNLSHRIKRLWLPGEPMPSFVRGLE	SC	0	0	id_50_2036
BKP1_001975	WP_038761969.1 type VI secretion system baseplate subunit TssF [Burkholderia pseudomallei]_0114	WP_038761969.1	GenBank	559	589	IVVMDHFFAVHAPVTSFVQLIVMSANTGRE	SC	0	0	id_50_2036
BKP1_001976	WP_256730684.1 type VI secretion system baseplate subunit TssF [Burkholderia pseudomallei]_0238	WP_256730684.1	GenBank	40	70	KIAVRLGISGDHSEDPHIERMLQSFALLAA	SC	0	0	id_50_2036
BKP1_001977	WP_208204952.1 type VI secretion system baseplate subunit TssF [Burkholderia pseudomallei]_0028	WP_208204952.1	GenBank	135	165	RISTARYAPTTAVPADVVLPAGTTGLLSIT	SC	0	0	id_50_2036
BKP1_001978	WP_038776077.1 type VI secretion system baseplate subunit TssF [Burkholderia pseudomallei]_0039	WP_038776077.1	GenBank	228	258	GYDEAEKLLNEDDGPPALRRLSEYFAFPKK	SC	0	0	id_50_2036
BKP1_001979	WP_038776077.1 type VI secretion system baseplate subunit TssF [Burkholderia pseudomallei]_0025	WP_038776077.1	GenBank	395	425	GKKETALSLVDLNGRPTTATVIEQITADVI	SC	0	0	id_50_2036
BKP1_001980	WP_256730684.1 type VI secretion system baseplate subunit TssF [Burkholderia pseudomallei]_0475	WP_256730684.1	GenBank	438	468	SNGDLPRAMRVGAEDGDLVNEQGTMVSRIE	SC	0	0	id_50_2036
BKP1_001981	WP_208836854.1 type VI secretion system baseplate subunit TssF [Burkholderia pseudomallei]_0283	WP_208836854.1	GenBank	310	340	PIVNLFRLRSMPLKRSPITNTYPVQSQNTG	SC	0	0	id_50_2036
BKP1_001982	WP_208204952.1 type VI secretion system baseplate subunit TssF [Burkholderia pseudomallei]_0417	WP_208204952.1	GenBank	562	592	MDHFFAVHAPTTSFVQLVVMSANSGAEIRR	SC	0	0	id_50_2036
BKP1_001983	WP_119637453.1 type VI secretion system baseplate subunit TssF [Burkholderia pseudomallei]_0305	WP_119637453.1	GenBank	219	249	TTPPLAAAGSDEAENLLDEDDGPPALRLLS	SC	0	0	id_50_2036
BKP1_001984	WP_038776077.1 type VI secretion system baseplate subunit TssF [Burkholderia pseudomallei]_0342	WP_038776077.1	GenBank	205	235	AAFVENAERRWSTLTEPPLAAAAGYDEAEK	SC	0	0	id_50_2036
BKP1_001985	WP_038776077.1 type VI secretion system baseplate subunit TssF [Burkholderia pseudomallei]_0299	WP_038776077.1	GenBank	544	574	LTVDEQAFAAVSVNAFISVMDHFFTVHAPT	SC	0	0	id_50_2036
BKP1_001986	WP_038776077.1 type VI secretion system baseplate subunit TssF [Burkholderia pseudomallei]_0267	WP_038776077.1	GenBank	313	343	VNLFRLTSLPLKRSPVTNTYPVQSQNTDVA	SC	0	0	id_50_2036
BKP1_001987	WP_038776077.1 type VI secretion system baseplate subunit TssF [Burkholderia pseudomallei]_0213	WP_038776077.1	GenBank	372	402	HGSSAKPAGPYWVLVHHSAASPSGKKETAL	SC	0	0	id_50_2036
BKP1_001988	WP_038776077.1 type VI secretion system baseplate subunit TssF [Burkholderia pseudomallei]_0479	WP_038776077.1	GenBank	497	527	RLFRQFTAHSAGHAKLLDGLTNLSHRAKQL	SC	0	0	id_50_2036
BKP1_001989	WP_232341701.1 type VI secretion system baseplate subunit TssF [Burkholderia pseudomallei]_0188	WP_232341701.1	GenBank	254	284	PKKFDFVDVDLAALAHTAGPTRQLTLHLAI	SC	0	0	id_50_2036
BKP1_001990	WP_085538483.1 type VI secretion system baseplate subunit TssF [Burkholderia pseudomallei]_0132	WP_085538483.1	GenBank	209	239	ENAERRWSMLTTPPLVAAGYDETEKLLDEE	SC	0	0	id_50_2036
BKP1_001991	WP_119637453.1 type VI secretion system baseplate subunit TssF [Burkholderia pseudomallei]_0539	WP_119637453.1	GenBank	425	455	SNGDFPRTMRSGAEDGDLVNEQGTMVSRIV	SC	0	0	id_50_2036
BKP1_001992	WP_232341241.1 type VI secretion system baseplate subunit TssF [Burkholderia pseudomallei]_0140	WP_232341241.1	GenBank	1	31	KFSSAYLLPLWSPLLWWGLLWQLPFTSSRR	SC	0	0	id_50_2036
BKP1_001993	WP_038776077.1 type VI secretion system baseplate subunit TssF [Burkholderia pseudomallei]_0170	WP_038776077.1	GenBank	91	121	AQFDVSDMFEKLTEPSLIARGTELASKTDD	SC	0	0	id_50_2036
BKP1_001994	WP_208204952.1 type VI secretion system baseplate subunit TssF [Burkholderia pseudomallei]_0457	WP_208204952.1	GenBank	390	420	ASLSGKKETALNLVDLDGRPTTGTVIEQIT	SC	0	0	id_50_2036
BKP1_001995	WP_208204952.1 type VI secretion system baseplate subunit TssF [Burkholderia pseudomallei]_0129	WP_208204952.1	GenBank	150	180	DVVLPAGTTGLLSITFEVARPDFRIDAVPR	SC	0	0	id_50_2036
BKP1_001996	WP_119637453.1 type VI secretion system baseplate subunit TssF [Burkholderia pseudomallei]_0045	WP_119637453.1	GenBank	127	157	YDVTLAPVQVSTARYAPATAVPADVVLPAG	SC	0	0	id_50_2036
BKP1_001997	WP_195761495.1 type IV secretion system protein [Burkholderia pseudomallei]_000_030	WP_195761495.1	GenBank	0	30	MDQGQLWQFVSGSIDNAISKYVTGISSSIA	SW	0	0	id_50_6377
[truncated: 242,002+ more rows]
