# Supplementary material for: PepSeq as a highly multiplexed platform for melioidosis antigen discovery and vaccine development
Source: Front Immunol. 2025 Jul 3;16:1605758. doi: 10.3389/fimmu.2025.1605758 (PMC12267161; doi:10.3389/fimmu.2025.1605758)
Supplement: Supplementary file 5 [file Table3.xlsx]

## Sheet: Supplementary_Table_3
Supplementary Table 3. BKP2 Peptide Library Metadata
CodeName	Peptide	Protein_ID	Start_position	Protein_seq	Protein_length	locus.tag
BKP2_00001	MKTIWKFFGLAAAVSVLLA	BPSL0093	1	MKTIWKFFGLAAAVSVLLAGCGGGGDNSGQTGTLHVAMTDAPSCGFDHIYVTVAKVRVNMSAQAGDNDSGWTDVALAAPQKVDLLSLTNGVLADLGRNALPAGQYQQVRLVLAQNQGNTLANSIVPTGGTEQPLATPSATQSGYKIITPFTVQPNTLVDLVLDFNACKSIVQRGNGTYALKPVVTATPTVVSGAIDGYVSPTEAGATVYAEQNGHVIKGTLADSTGHFVLTPLVQSSTNGNYDIVITQNNVSTGIVRSVPVVVNTTTSVSTSSAPITLPASTMNMVSGTATASADAILRALQMVNSLPYEIASTNANLDTGAYALTLPTAAPIVGTYSGSLPVAMSAAPSAAGQYTIEADAANGATQQQPANITAGSVSNVNFGF	385	BPSL0093
BKP2_00002	TIWKFFGLAAAVSVLLAGC	BPSL0093	3	MKTIWKFFGLAAAVSVLLAGCGGGGDNSGQTGTLHVAMTDAPSCGFDHIYVTVAKVRVNMSAQAGDNDSGWTDVALAAPQKVDLLSLTNGVLADLGRNALPAGQYQQVRLVLAQNQGNTLANSIVPTGGTEQPLATPSATQSGYKIITPFTVQPNTLVDLVLDFNACKSIVQRGNGTYALKPVVTATPTVVSGAIDGYVSPTEAGATVYAEQNGHVIKGTLADSTGHFVLTPLVQSSTNGNYDIVITQNNVSTGIVRSVPVVVNTTTSVSTSSAPITLPASTMNMVSGTATASADAILRALQMVNSLPYEIASTNANLDTGAYALTLPTAAPIVGTYSGSLPVAMSAAPSAAGQYTIEADAANGATQQQPANITAGSVSNVNFGF	385	BPSL0093
BKP2_00003	WKFFGLAAAVSVLLAGCGG	BPSL0093	5	MKTIWKFFGLAAAVSVLLAGCGGGGDNSGQTGTLHVAMTDAPSCGFDHIYVTVAKVRVNMSAQAGDNDSGWTDVALAAPQKVDLLSLTNGVLADLGRNALPAGQYQQVRLVLAQNQGNTLANSIVPTGGTEQPLATPSATQSGYKIITPFTVQPNTLVDLVLDFNACKSIVQRGNGTYALKPVVTATPTVVSGAIDGYVSPTEAGATVYAEQNGHVIKGTLADSTGHFVLTPLVQSSTNGNYDIVITQNNVSTGIVRSVPVVVNTTTSVSTSSAPITLPASTMNMVSGTATASADAILRALQMVNSLPYEIASTNANLDTGAYALTLPTAAPIVGTYSGSLPVAMSAAPSAAGQYTIEADAANGATQQQPANITAGSVSNVNFGF	385	BPSL0093
BKP2_00004	FFGLAAAVSVLLAGCGGGG	BPSL0093	7	MKTIWKFFGLAAAVSVLLAGCGGGGDNSGQTGTLHVAMTDAPSCGFDHIYVTVAKVRVNMSAQAGDNDSGWTDVALAAPQKVDLLSLTNGVLADLGRNALPAGQYQQVRLVLAQNQGNTLANSIVPTGGTEQPLATPSATQSGYKIITPFTVQPNTLVDLVLDFNACKSIVQRGNGTYALKPVVTATPTVVSGAIDGYVSPTEAGATVYAEQNGHVIKGTLADSTGHFVLTPLVQSSTNGNYDIVITQNNVSTGIVRSVPVVVNTTTSVSTSSAPITLPASTMNMVSGTATASADAILRALQMVNSLPYEIASTNANLDTGAYALTLPTAAPIVGTYSGSLPVAMSAAPSAAGQYTIEADAANGATQQQPANITAGSVSNVNFGF	385	BPSL0093
BKP2_00005	GLAAAVSVLLAGCGGGGDN	BPSL0093	9	MKTIWKFFGLAAAVSVLLAGCGGGGDNSGQTGTLHVAMTDAPSCGFDHIYVTVAKVRVNMSAQAGDNDSGWTDVALAAPQKVDLLSLTNGVLADLGRNALPAGQYQQVRLVLAQNQGNTLANSIVPTGGTEQPLATPSATQSGYKIITPFTVQPNTLVDLVLDFNACKSIVQRGNGTYALKPVVTATPTVVSGAIDGYVSPTEAGATVYAEQNGHVIKGTLADSTGHFVLTPLVQSSTNGNYDIVITQNNVSTGIVRSVPVVVNTTTSVSTSSAPITLPASTMNMVSGTATASADAILRALQMVNSLPYEIASTNANLDTGAYALTLPTAAPIVGTYSGSLPVAMSAAPSAAGQYTIEADAANGATQQQPANITAGSVSNVNFGF	385	BPSL0093
BKP2_00006	AAAVSVLLAGCGGGGDNSG	BPSL0093	11	MKTIWKFFGLAAAVSVLLAGCGGGGDNSGQTGTLHVAMTDAPSCGFDHIYVTVAKVRVNMSAQAGDNDSGWTDVALAAPQKVDLLSLTNGVLADLGRNALPAGQYQQVRLVLAQNQGNTLANSIVPTGGTEQPLATPSATQSGYKIITPFTVQPNTLVDLVLDFNACKSIVQRGNGTYALKPVVTATPTVVSGAIDGYVSPTEAGATVYAEQNGHVIKGTLADSTGHFVLTPLVQSSTNGNYDIVITQNNVSTGIVRSVPVVVNTTTSVSTSSAPITLPASTMNMVSGTATASADAILRALQMVNSLPYEIASTNANLDTGAYALTLPTAAPIVGTYSGSLPVAMSAAPSAAGQYTIEADAANGATQQQPANITAGSVSNVNFGF	385	BPSL0093
BKP2_00007	AVSVLLAGCGGGGDNSGQT	BPSL0093	13	MKTIWKFFGLAAAVSVLLAGCGGGGDNSGQTGTLHVAMTDAPSCGFDHIYVTVAKVRVNMSAQAGDNDSGWTDVALAAPQKVDLLSLTNGVLADLGRNALPAGQYQQVRLVLAQNQGNTLANSIVPTGGTEQPLATPSATQSGYKIITPFTVQPNTLVDLVLDFNACKSIVQRGNGTYALKPVVTATPTVVSGAIDGYVSPTEAGATVYAEQNGHVIKGTLADSTGHFVLTPLVQSSTNGNYDIVITQNNVSTGIVRSVPVVVNTTTSVSTSSAPITLPASTMNMVSGTATASADAILRALQMVNSLPYEIASTNANLDTGAYALTLPTAAPIVGTYSGSLPVAMSAAPSAAGQYTIEADAANGATQQQPANITAGSVSNVNFGF	385	BPSL0093
BKP2_00008	SVLLAGCGGGGDNSGQTGT	BPSL0093	15	MKTIWKFFGLAAAVSVLLAGCGGGGDNSGQTGTLHVAMTDAPSCGFDHIYVTVAKVRVNMSAQAGDNDSGWTDVALAAPQKVDLLSLTNGVLADLGRNALPAGQYQQVRLVLAQNQGNTLANSIVPTGGTEQPLATPSATQSGYKIITPFTVQPNTLVDLVLDFNACKSIVQRGNGTYALKPVVTATPTVVSGAIDGYVSPTEAGATVYAEQNGHVIKGTLADSTGHFVLTPLVQSSTNGNYDIVITQNNVSTGIVRSVPVVVNTTTSVSTSSAPITLPASTMNMVSGTATASADAILRALQMVNSLPYEIASTNANLDTGAYALTLPTAAPIVGTYSGSLPVAMSAAPSAAGQYTIEADAANGATQQQPANITAGSVSNVNFGF	385	BPSL0093
BKP2_00009	LLAGCGGGGDNSGQTGTLH	BPSL0093	17	MKTIWKFFGLAAAVSVLLAGCGGGGDNSGQTGTLHVAMTDAPSCGFDHIYVTVAKVRVNMSAQAGDNDSGWTDVALAAPQKVDLLSLTNGVLADLGRNALPAGQYQQVRLVLAQNQGNTLANSIVPTGGTEQPLATPSATQSGYKIITPFTVQPNTLVDLVLDFNACKSIVQRGNGTYALKPVVTATPTVVSGAIDGYVSPTEAGATVYAEQNGHVIKGTLADSTGHFVLTPLVQSSTNGNYDIVITQNNVSTGIVRSVPVVVNTTTSVSTSSAPITLPASTMNMVSGTATASADAILRALQMVNSLPYEIASTNANLDTGAYALTLPTAAPIVGTYSGSLPVAMSAAPSAAGQYTIEADAANGATQQQPANITAGSVSNVNFGF	385	BPSL0093
BKP2_00010	AGCGGGGDNSGQTGTLHVA	BPSL0093	19	MKTIWKFFGLAAAVSVLLAGCGGGGDNSGQTGTLHVAMTDAPSCGFDHIYVTVAKVRVNMSAQAGDNDSGWTDVALAAPQKVDLLSLTNGVLADLGRNALPAGQYQQVRLVLAQNQGNTLANSIVPTGGTEQPLATPSATQSGYKIITPFTVQPNTLVDLVLDFNACKSIVQRGNGTYALKPVVTATPTVVSGAIDGYVSPTEAGATVYAEQNGHVIKGTLADSTGHFVLTPLVQSSTNGNYDIVITQNNVSTGIVRSVPVVVNTTTSVSTSSAPITLPASTMNMVSGTATASADAILRALQMVNSLPYEIASTNANLDTGAYALTLPTAAPIVGTYSGSLPVAMSAAPSAAGQYTIEADAANGATQQQPANITAGSVSNVNFGF	385	BPSL0093
BKP2_00011	CGGGGDNSGQTGTLHVAMT	BPSL0093	21	MKTIWKFFGLAAAVSVLLAGCGGGGDNSGQTGTLHVAMTDAPSCGFDHIYVTVAKVRVNMSAQAGDNDSGWTDVALAAPQKVDLLSLTNGVLADLGRNALPAGQYQQVRLVLAQNQGNTLANSIVPTGGTEQPLATPSATQSGYKIITPFTVQPNTLVDLVLDFNACKSIVQRGNGTYALKPVVTATPTVVSGAIDGYVSPTEAGATVYAEQNGHVIKGTLADSTGHFVLTPLVQSSTNGNYDIVITQNNVSTGIVRSVPVVVNTTTSVSTSSAPITLPASTMNMVSGTATASADAILRALQMVNSLPYEIASTNANLDTGAYALTLPTAAPIVGTYSGSLPVAMSAAPSAAGQYTIEADAANGATQQQPANITAGSVSNVNFGF	385	BPSL0093
BKP2_00012	GGGDNSGQTGTLHVAMTDA	BPSL0093	23	MKTIWKFFGLAAAVSVLLAGCGGGGDNSGQTGTLHVAMTDAPSCGFDHIYVTVAKVRVNMSAQAGDNDSGWTDVALAAPQKVDLLSLTNGVLADLGRNALPAGQYQQVRLVLAQNQGNTLANSIVPTGGTEQPLATPSATQSGYKIITPFTVQPNTLVDLVLDFNACKSIVQRGNGTYALKPVVTATPTVVSGAIDGYVSPTEAGATVYAEQNGHVIKGTLADSTGHFVLTPLVQSSTNGNYDIVITQNNVSTGIVRSVPVVVNTTTSVSTSSAPITLPASTMNMVSGTATASADAILRALQMVNSLPYEIASTNANLDTGAYALTLPTAAPIVGTYSGSLPVAMSAAPSAAGQYTIEADAANGATQQQPANITAGSVSNVNFGF	385	BPSL0093
BKP2_00013	GDNSGQTGTLHVAMTDAPS	BPSL0093	25	MKTIWKFFGLAAAVSVLLAGCGGGGDNSGQTGTLHVAMTDAPSCGFDHIYVTVAKVRVNMSAQAGDNDSGWTDVALAAPQKVDLLSLTNGVLADLGRNALPAGQYQQVRLVLAQNQGNTLANSIVPTGGTEQPLATPSATQSGYKIITPFTVQPNTLVDLVLDFNACKSIVQRGNGTYALKPVVTATPTVVSGAIDGYVSPTEAGATVYAEQNGHVIKGTLADSTGHFVLTPLVQSSTNGNYDIVITQNNVSTGIVRSVPVVVNTTTSVSTSSAPITLPASTMNMVSGTATASADAILRALQMVNSLPYEIASTNANLDTGAYALTLPTAAPIVGTYSGSLPVAMSAAPSAAGQYTIEADAANGATQQQPANITAGSVSNVNFGF	385	BPSL0093
BKP2_00014	NSGQTGTLHVAMTDAPSCG	BPSL0093	27	MKTIWKFFGLAAAVSVLLAGCGGGGDNSGQTGTLHVAMTDAPSCGFDHIYVTVAKVRVNMSAQAGDNDSGWTDVALAAPQKVDLLSLTNGVLADLGRNALPAGQYQQVRLVLAQNQGNTLANSIVPTGGTEQPLATPSATQSGYKIITPFTVQPNTLVDLVLDFNACKSIVQRGNGTYALKPVVTATPTVVSGAIDGYVSPTEAGATVYAEQNGHVIKGTLADSTGHFVLTPLVQSSTNGNYDIVITQNNVSTGIVRSVPVVVNTTTSVSTSSAPITLPASTMNMVSGTATASADAILRALQMVNSLPYEIASTNANLDTGAYALTLPTAAPIVGTYSGSLPVAMSAAPSAAGQYTIEADAANGATQQQPANITAGSVSNVNFGF	385	BPSL0093
BKP2_00015	GQTGTLHVAMTDAPSCGFD	BPSL0093	29	MKTIWKFFGLAAAVSVLLAGCGGGGDNSGQTGTLHVAMTDAPSCGFDHIYVTVAKVRVNMSAQAGDNDSGWTDVALAAPQKVDLLSLTNGVLADLGRNALPAGQYQQVRLVLAQNQGNTLANSIVPTGGTEQPLATPSATQSGYKIITPFTVQPNTLVDLVLDFNACKSIVQRGNGTYALKPVVTATPTVVSGAIDGYVSPTEAGATVYAEQNGHVIKGTLADSTGHFVLTPLVQSSTNGNYDIVITQNNVSTGIVRSVPVVVNTTTSVSTSSAPITLPASTMNMVSGTATASADAILRALQMVNSLPYEIASTNANLDTGAYALTLPTAAPIVGTYSGSLPVAMSAAPSAAGQYTIEADAANGATQQQPANITAGSVSNVNFGF	385	BPSL0093
BKP2_00016	TGTLHVAMTDAPSCGFDHI	BPSL0093	31	MKTIWKFFGLAAAVSVLLAGCGGGGDNSGQTGTLHVAMTDAPSCGFDHIYVTVAKVRVNMSAQAGDNDSGWTDVALAAPQKVDLLSLTNGVLADLGRNALPAGQYQQVRLVLAQNQGNTLANSIVPTGGTEQPLATPSATQSGYKIITPFTVQPNTLVDLVLDFNACKSIVQRGNGTYALKPVVTATPTVVSGAIDGYVSPTEAGATVYAEQNGHVIKGTLADSTGHFVLTPLVQSSTNGNYDIVITQNNVSTGIVRSVPVVVNTTTSVSTSSAPITLPASTMNMVSGTATASADAILRALQMVNSLPYEIASTNANLDTGAYALTLPTAAPIVGTYSGSLPVAMSAAPSAAGQYTIEADAANGATQQQPANITAGSVSNVNFGF	385	BPSL0093
BKP2_00017	TLHVAMTDAPSCGFDHIYV	BPSL0093	33	MKTIWKFFGLAAAVSVLLAGCGGGGDNSGQTGTLHVAMTDAPSCGFDHIYVTVAKVRVNMSAQAGDNDSGWTDVALAAPQKVDLLSLTNGVLADLGRNALPAGQYQQVRLVLAQNQGNTLANSIVPTGGTEQPLATPSATQSGYKIITPFTVQPNTLVDLVLDFNACKSIVQRGNGTYALKPVVTATPTVVSGAIDGYVSPTEAGATVYAEQNGHVIKGTLADSTGHFVLTPLVQSSTNGNYDIVITQNNVSTGIVRSVPVVVNTTTSVSTSSAPITLPASTMNMVSGTATASADAILRALQMVNSLPYEIASTNANLDTGAYALTLPTAAPIVGTYSGSLPVAMSAAPSAAGQYTIEADAANGATQQQPANITAGSVSNVNFGF	385	BPSL0093
BKP2_00018	HVAMTDAPSCGFDHIYVTV	BPSL0093	35	MKTIWKFFGLAAAVSVLLAGCGGGGDNSGQTGTLHVAMTDAPSCGFDHIYVTVAKVRVNMSAQAGDNDSGWTDVALAAPQKVDLLSLTNGVLADLGRNALPAGQYQQVRLVLAQNQGNTLANSIVPTGGTEQPLATPSATQSGYKIITPFTVQPNTLVDLVLDFNACKSIVQRGNGTYALKPVVTATPTVVSGAIDGYVSPTEAGATVYAEQNGHVIKGTLADSTGHFVLTPLVQSSTNGNYDIVITQNNVSTGIVRSVPVVVNTTTSVSTSSAPITLPASTMNMVSGTATASADAILRALQMVNSLPYEIASTNANLDTGAYALTLPTAAPIVGTYSGSLPVAMSAAPSAAGQYTIEADAANGATQQQPANITAGSVSNVNFGF	385	BPSL0093
BKP2_00019	AMTDAPSCGFDHIYVTVAK	BPSL0093	37	MKTIWKFFGLAAAVSVLLAGCGGGGDNSGQTGTLHVAMTDAPSCGFDHIYVTVAKVRVNMSAQAGDNDSGWTDVALAAPQKVDLLSLTNGVLADLGRNALPAGQYQQVRLVLAQNQGNTLANSIVPTGGTEQPLATPSATQSGYKIITPFTVQPNTLVDLVLDFNACKSIVQRGNGTYALKPVVTATPTVVSGAIDGYVSPTEAGATVYAEQNGHVIKGTLADSTGHFVLTPLVQSSTNGNYDIVITQNNVSTGIVRSVPVVVNTTTSVSTSSAPITLPASTMNMVSGTATASADAILRALQMVNSLPYEIASTNANLDTGAYALTLPTAAPIVGTYSGSLPVAMSAAPSAAGQYTIEADAANGATQQQPANITAGSVSNVNFGF	385	BPSL0093
BKP2_00020	TDAPSCGFDHIYVTVAKVR	BPSL0093	39	MKTIWKFFGLAAAVSVLLAGCGGGGDNSGQTGTLHVAMTDAPSCGFDHIYVTVAKVRVNMSAQAGDNDSGWTDVALAAPQKVDLLSLTNGVLADLGRNALPAGQYQQVRLVLAQNQGNTLANSIVPTGGTEQPLATPSATQSGYKIITPFTVQPNTLVDLVLDFNACKSIVQRGNGTYALKPVVTATPTVVSGAIDGYVSPTEAGATVYAEQNGHVIKGTLADSTGHFVLTPLVQSSTNGNYDIVITQNNVSTGIVRSVPVVVNTTTSVSTSSAPITLPASTMNMVSGTATASADAILRALQMVNSLPYEIASTNANLDTGAYALTLPTAAPIVGTYSGSLPVAMSAAPSAAGQYTIEADAANGATQQQPANITAGSVSNVNFGF	385	BPSL0093
BKP2_00021	APSCGFDHIYVTVAKVRVN	BPSL0093	41	MKTIWKFFGLAAAVSVLLAGCGGGGDNSGQTGTLHVAMTDAPSCGFDHIYVTVAKVRVNMSAQAGDNDSGWTDVALAAPQKVDLLSLTNGVLADLGRNALPAGQYQQVRLVLAQNQGNTLANSIVPTGGTEQPLATPSATQSGYKIITPFTVQPNTLVDLVLDFNACKSIVQRGNGTYALKPVVTATPTVVSGAIDGYVSPTEAGATVYAEQNGHVIKGTLADSTGHFVLTPLVQSSTNGNYDIVITQNNVSTGIVRSVPVVVNTTTSVSTSSAPITLPASTMNMVSGTATASADAILRALQMVNSLPYEIASTNANLDTGAYALTLPTAAPIVGTYSGSLPVAMSAAPSAAGQYTIEADAANGATQQQPANITAGSVSNVNFGF	385	BPSL0093
BKP2_00022	SCGFDHIYVTVAKVRVNMS	BPSL0093	43	MKTIWKFFGLAAAVSVLLAGCGGGGDNSGQTGTLHVAMTDAPSCGFDHIYVTVAKVRVNMSAQAGDNDSGWTDVALAAPQKVDLLSLTNGVLADLGRNALPAGQYQQVRLVLAQNQGNTLANSIVPTGGTEQPLATPSATQSGYKIITPFTVQPNTLVDLVLDFNACKSIVQRGNGTYALKPVVTATPTVVSGAIDGYVSPTEAGATVYAEQNGHVIKGTLADSTGHFVLTPLVQSSTNGNYDIVITQNNVSTGIVRSVPVVVNTTTSVSTSSAPITLPASTMNMVSGTATASADAILRALQMVNSLPYEIASTNANLDTGAYALTLPTAAPIVGTYSGSLPVAMSAAPSAAGQYTIEADAANGATQQQPANITAGSVSNVNFGF	385	BPSL0093
BKP2_00023	GFDHIYVTVAKVRVNMSAQ	BPSL0093	45	MKTIWKFFGLAAAVSVLLAGCGGGGDNSGQTGTLHVAMTDAPSCGFDHIYVTVAKVRVNMSAQAGDNDSGWTDVALAAPQKVDLLSLTNGVLADLGRNALPAGQYQQVRLVLAQNQGNTLANSIVPTGGTEQPLATPSATQSGYKIITPFTVQPNTLVDLVLDFNACKSIVQRGNGTYALKPVVTATPTVVSGAIDGYVSPTEAGATVYAEQNGHVIKGTLADSTGHFVLTPLVQSSTNGNYDIVITQNNVSTGIVRSVPVVVNTTTSVSTSSAPITLPASTMNMVSGTATASADAILRALQMVNSLPYEIASTNANLDTGAYALTLPTAAPIVGTYSGSLPVAMSAAPSAAGQYTIEADAANGATQQQPANITAGSVSNVNFGF	385	BPSL0093
BKP2_00024	DHIYVTVAKVRVNMSAQAG	BPSL0093	47	MKTIWKFFGLAAAVSVLLAGCGGGGDNSGQTGTLHVAMTDAPSCGFDHIYVTVAKVRVNMSAQAGDNDSGWTDVALAAPQKVDLLSLTNGVLADLGRNALPAGQYQQVRLVLAQNQGNTLANSIVPTGGTEQPLATPSATQSGYKIITPFTVQPNTLVDLVLDFNACKSIVQRGNGTYALKPVVTATPTVVSGAIDGYVSPTEAGATVYAEQNGHVIKGTLADSTGHFVLTPLVQSSTNGNYDIVITQNNVSTGIVRSVPVVVNTTTSVSTSSAPITLPASTMNMVSGTATASADAILRALQMVNSLPYEIASTNANLDTGAYALTLPTAAPIVGTYSGSLPVAMSAAPSAAGQYTIEADAANGATQQQPANITAGSVSNVNFGF	385	BPSL0093
BKP2_00025	IYVTVAKVRVNMSAQAGDN	BPSL0093	49	MKTIWKFFGLAAAVSVLLAGCGGGGDNSGQTGTLHVAMTDAPSCGFDHIYVTVAKVRVNMSAQAGDNDSGWTDVALAAPQKVDLLSLTNGVLADLGRNALPAGQYQQVRLVLAQNQGNTLANSIVPTGGTEQPLATPSATQSGYKIITPFTVQPNTLVDLVLDFNACKSIVQRGNGTYALKPVVTATPTVVSGAIDGYVSPTEAGATVYAEQNGHVIKGTLADSTGHFVLTPLVQSSTNGNYDIVITQNNVSTGIVRSVPVVVNTTTSVSTSSAPITLPASTMNMVSGTATASADAILRALQMVNSLPYEIASTNANLDTGAYALTLPTAAPIVGTYSGSLPVAMSAAPSAAGQYTIEADAANGATQQQPANITAGSVSNVNFGF	385	BPSL0093
BKP2_00026	VTVAKVRVNMSAQAGDNDS	BPSL0093	51	MKTIWKFFGLAAAVSVLLAGCGGGGDNSGQTGTLHVAMTDAPSCGFDHIYVTVAKVRVNMSAQAGDNDSGWTDVALAAPQKVDLLSLTNGVLADLGRNALPAGQYQQVRLVLAQNQGNTLANSIVPTGGTEQPLATPSATQSGYKIITPFTVQPNTLVDLVLDFNACKSIVQRGNGTYALKPVVTATPTVVSGAIDGYVSPTEAGATVYAEQNGHVIKGTLADSTGHFVLTPLVQSSTNGNYDIVITQNNVSTGIVRSVPVVVNTTTSVSTSSAPITLPASTMNMVSGTATASADAILRALQMVNSLPYEIASTNANLDTGAYALTLPTAAPIVGTYSGSLPVAMSAAPSAAGQYTIEADAANGATQQQPANITAGSVSNVNFGF	385	BPSL0093
BKP2_00027	VAKVRVNMSAQAGDNDSGW	BPSL0093	53	MKTIWKFFGLAAAVSVLLAGCGGGGDNSGQTGTLHVAMTDAPSCGFDHIYVTVAKVRVNMSAQAGDNDSGWTDVALAAPQKVDLLSLTNGVLADLGRNALPAGQYQQVRLVLAQNQGNTLANSIVPTGGTEQPLATPSATQSGYKIITPFTVQPNTLVDLVLDFNACKSIVQRGNGTYALKPVVTATPTVVSGAIDGYVSPTEAGATVYAEQNGHVIKGTLADSTGHFVLTPLVQSSTNGNYDIVITQNNVSTGIVRSVPVVVNTTTSVSTSSAPITLPASTMNMVSGTATASADAILRALQMVNSLPYEIASTNANLDTGAYALTLPTAAPIVGTYSGSLPVAMSAAPSAAGQYTIEADAANGATQQQPANITAGSVSNVNFGF	385	BPSL0093
BKP2_00028	KVRVNMSAQAGDNDSGWTD	BPSL0093	55	MKTIWKFFGLAAAVSVLLAGCGGGGDNSGQTGTLHVAMTDAPSCGFDHIYVTVAKVRVNMSAQAGDNDSGWTDVALAAPQKVDLLSLTNGVLADLGRNALPAGQYQQVRLVLAQNQGNTLANSIVPTGGTEQPLATPSATQSGYKIITPFTVQPNTLVDLVLDFNACKSIVQRGNGTYALKPVVTATPTVVSGAIDGYVSPTEAGATVYAEQNGHVIKGTLADSTGHFVLTPLVQSSTNGNYDIVITQNNVSTGIVRSVPVVVNTTTSVSTSSAPITLPASTMNMVSGTATASADAILRALQMVNSLPYEIASTNANLDTGAYALTLPTAAPIVGTYSGSLPVAMSAAPSAAGQYTIEADAANGATQQQPANITAGSVSNVNFGF	385	BPSL0093
BKP2_00029	RVNMSAQAGDNDSGWTDVA	BPSL0093	57	MKTIWKFFGLAAAVSVLLAGCGGGGDNSGQTGTLHVAMTDAPSCGFDHIYVTVAKVRVNMSAQAGDNDSGWTDVALAAPQKVDLLSLTNGVLADLGRNALPAGQYQQVRLVLAQNQGNTLANSIVPTGGTEQPLATPSATQSGYKIITPFTVQPNTLVDLVLDFNACKSIVQRGNGTYALKPVVTATPTVVSGAIDGYVSPTEAGATVYAEQNGHVIKGTLADSTGHFVLTPLVQSSTNGNYDIVITQNNVSTGIVRSVPVVVNTTTSVSTSSAPITLPASTMNMVSGTATASADAILRALQMVNSLPYEIASTNANLDTGAYALTLPTAAPIVGTYSGSLPVAMSAAPSAAGQYTIEADAANGATQQQPANITAGSVSNVNFGF	385	BPSL0093
BKP2_00030	NMSAQAGDNDSGWTDVALA	BPSL0093	59	MKTIWKFFGLAAAVSVLLAGCGGGGDNSGQTGTLHVAMTDAPSCGFDHIYVTVAKVRVNMSAQAGDNDSGWTDVALAAPQKVDLLSLTNGVLADLGRNALPAGQYQQVRLVLAQNQGNTLANSIVPTGGTEQPLATPSATQSGYKIITPFTVQPNTLVDLVLDFNACKSIVQRGNGTYALKPVVTATPTVVSGAIDGYVSPTEAGATVYAEQNGHVIKGTLADSTGHFVLTPLVQSSTNGNYDIVITQNNVSTGIVRSVPVVVNTTTSVSTSSAPITLPASTMNMVSGTATASADAILRALQMVNSLPYEIASTNANLDTGAYALTLPTAAPIVGTYSGSLPVAMSAAPSAAGQYTIEADAANGATQQQPANITAGSVSNVNFGF	385	BPSL0093
BKP2_00031	SAQAGDNDSGWTDVALAAP	BPSL0093	61	MKTIWKFFGLAAAVSVLLAGCGGGGDNSGQTGTLHVAMTDAPSCGFDHIYVTVAKVRVNMSAQAGDNDSGWTDVALAAPQKVDLLSLTNGVLADLGRNALPAGQYQQVRLVLAQNQGNTLANSIVPTGGTEQPLATPSATQSGYKIITPFTVQPNTLVDLVLDFNACKSIVQRGNGTYALKPVVTATPTVVSGAIDGYVSPTEAGATVYAEQNGHVIKGTLADSTGHFVLTPLVQSSTNGNYDIVITQNNVSTGIVRSVPVVVNTTTSVSTSSAPITLPASTMNMVSGTATASADAILRALQMVNSLPYEIASTNANLDTGAYALTLPTAAPIVGTYSGSLPVAMSAAPSAAGQYTIEADAANGATQQQPANITAGSVSNVNFGF	385	BPSL0093
BKP2_00032	QAGDNDSGWTDVALAAPQK	BPSL0093	63	MKTIWKFFGLAAAVSVLLAGCGGGGDNSGQTGTLHVAMTDAPSCGFDHIYVTVAKVRVNMSAQAGDNDSGWTDVALAAPQKVDLLSLTNGVLADLGRNALPAGQYQQVRLVLAQNQGNTLANSIVPTGGTEQPLATPSATQSGYKIITPFTVQPNTLVDLVLDFNACKSIVQRGNGTYALKPVVTATPTVVSGAIDGYVSPTEAGATVYAEQNGHVIKGTLADSTGHFVLTPLVQSSTNGNYDIVITQNNVSTGIVRSVPVVVNTTTSVSTSSAPITLPASTMNMVSGTATASADAILRALQMVNSLPYEIASTNANLDTGAYALTLPTAAPIVGTYSGSLPVAMSAAPSAAGQYTIEADAANGATQQQPANITAGSVSNVNFGF	385	BPSL0093
BKP2_00033	GDNDSGWTDVALAAPQKVD	BPSL0093	65	MKTIWKFFGLAAAVSVLLAGCGGGGDNSGQTGTLHVAMTDAPSCGFDHIYVTVAKVRVNMSAQAGDNDSGWTDVALAAPQKVDLLSLTNGVLADLGRNALPAGQYQQVRLVLAQNQGNTLANSIVPTGGTEQPLATPSATQSGYKIITPFTVQPNTLVDLVLDFNACKSIVQRGNGTYALKPVVTATPTVVSGAIDGYVSPTEAGATVYAEQNGHVIKGTLADSTGHFVLTPLVQSSTNGNYDIVITQNNVSTGIVRSVPVVVNTTTSVSTSSAPITLPASTMNMVSGTATASADAILRALQMVNSLPYEIASTNANLDTGAYALTLPTAAPIVGTYSGSLPVAMSAAPSAAGQYTIEADAANGATQQQPANITAGSVSNVNFGF	385	BPSL0093
BKP2_00034	NDSGWTDVALAAPQKVDLL	BPSL0093	67	MKTIWKFFGLAAAVSVLLAGCGGGGDNSGQTGTLHVAMTDAPSCGFDHIYVTVAKVRVNMSAQAGDNDSGWTDVALAAPQKVDLLSLTNGVLADLGRNALPAGQYQQVRLVLAQNQGNTLANSIVPTGGTEQPLATPSATQSGYKIITPFTVQPNTLVDLVLDFNACKSIVQRGNGTYALKPVVTATPTVVSGAIDGYVSPTEAGATVYAEQNGHVIKGTLADSTGHFVLTPLVQSSTNGNYDIVITQNNVSTGIVRSVPVVVNTTTSVSTSSAPITLPASTMNMVSGTATASADAILRALQMVNSLPYEIASTNANLDTGAYALTLPTAAPIVGTYSGSLPVAMSAAPSAAGQYTIEADAANGATQQQPANITAGSVSNVNFGF	385	BPSL0093
BKP2_00035	SGWTDVALAAPQKVDLLSL	BPSL0093	69	MKTIWKFFGLAAAVSVLLAGCGGGGDNSGQTGTLHVAMTDAPSCGFDHIYVTVAKVRVNMSAQAGDNDSGWTDVALAAPQKVDLLSLTNGVLADLGRNALPAGQYQQVRLVLAQNQGNTLANSIVPTGGTEQPLATPSATQSGYKIITPFTVQPNTLVDLVLDFNACKSIVQRGNGTYALKPVVTATPTVVSGAIDGYVSPTEAGATVYAEQNGHVIKGTLADSTGHFVLTPLVQSSTNGNYDIVITQNNVSTGIVRSVPVVVNTTTSVSTSSAPITLPASTMNMVSGTATASADAILRALQMVNSLPYEIASTNANLDTGAYALTLPTAAPIVGTYSGSLPVAMSAAPSAAGQYTIEADAANGATQQQPANITAGSVSNVNFGF	385	BPSL0093
BKP2_00036	WTDVALAAPQKVDLLSLTN	BPSL0093	71	MKTIWKFFGLAAAVSVLLAGCGGGGDNSGQTGTLHVAMTDAPSCGFDHIYVTVAKVRVNMSAQAGDNDSGWTDVALAAPQKVDLLSLTNGVLADLGRNALPAGQYQQVRLVLAQNQGNTLANSIVPTGGTEQPLATPSATQSGYKIITPFTVQPNTLVDLVLDFNACKSIVQRGNGTYALKPVVTATPTVVSGAIDGYVSPTEAGATVYAEQNGHVIKGTLADSTGHFVLTPLVQSSTNGNYDIVITQNNVSTGIVRSVPVVVNTTTSVSTSSAPITLPASTMNMVSGTATASADAILRALQMVNSLPYEIASTNANLDTGAYALTLPTAAPIVGTYSGSLPVAMSAAPSAAGQYTIEADAANGATQQQPANITAGSVSNVNFGF	385	BPSL0093
BKP2_00037	DVALAAPQKVDLLSLTNGV	BPSL0093	73	MKTIWKFFGLAAAVSVLLAGCGGGGDNSGQTGTLHVAMTDAPSCGFDHIYVTVAKVRVNMSAQAGDNDSGWTDVALAAPQKVDLLSLTNGVLADLGRNALPAGQYQQVRLVLAQNQGNTLANSIVPTGGTEQPLATPSATQSGYKIITPFTVQPNTLVDLVLDFNACKSIVQRGNGTYALKPVVTATPTVVSGAIDGYVSPTEAGATVYAEQNGHVIKGTLADSTGHFVLTPLVQSSTNGNYDIVITQNNVSTGIVRSVPVVVNTTTSVSTSSAPITLPASTMNMVSGTATASADAILRALQMVNSLPYEIASTNANLDTGAYALTLPTAAPIVGTYSGSLPVAMSAAPSAAGQYTIEADAANGATQQQPANITAGSVSNVNFGF	385	BPSL0093
BKP2_00038	ALAAPQKVDLLSLTNGVLA	BPSL0093	75	MKTIWKFFGLAAAVSVLLAGCGGGGDNSGQTGTLHVAMTDAPSCGFDHIYVTVAKVRVNMSAQAGDNDSGWTDVALAAPQKVDLLSLTNGVLADLGRNALPAGQYQQVRLVLAQNQGNTLANSIVPTGGTEQPLATPSATQSGYKIITPFTVQPNTLVDLVLDFNACKSIVQRGNGTYALKPVVTATPTVVSGAIDGYVSPTEAGATVYAEQNGHVIKGTLADSTGHFVLTPLVQSSTNGNYDIVITQNNVSTGIVRSVPVVVNTTTSVSTSSAPITLPASTMNMVSGTATASADAILRALQMVNSLPYEIASTNANLDTGAYALTLPTAAPIVGTYSGSLPVAMSAAPSAAGQYTIEADAANGATQQQPANITAGSVSNVNFGF	385	BPSL0093
BKP2_00039	AAPQKVDLLSLTNGVLADL	BPSL0093	77	MKTIWKFFGLAAAVSVLLAGCGGGGDNSGQTGTLHVAMTDAPSCGFDHIYVTVAKVRVNMSAQAGDNDSGWTDVALAAPQKVDLLSLTNGVLADLGRNALPAGQYQQVRLVLAQNQGNTLANSIVPTGGTEQPLATPSATQSGYKIITPFTVQPNTLVDLVLDFNACKSIVQRGNGTYALKPVVTATPTVVSGAIDGYVSPTEAGATVYAEQNGHVIKGTLADSTGHFVLTPLVQSSTNGNYDIVITQNNVSTGIVRSVPVVVNTTTSVSTSSAPITLPASTMNMVSGTATASADAILRALQMVNSLPYEIASTNANLDTGAYALTLPTAAPIVGTYSGSLPVAMSAAPSAAGQYTIEADAANGATQQQPANITAGSVSNVNFGF	385	BPSL0093
BKP2_00040	PQKVDLLSLTNGVLADLGR	BPSL0093	79	MKTIWKFFGLAAAVSVLLAGCGGGGDNSGQTGTLHVAMTDAPSCGFDHIYVTVAKVRVNMSAQAGDNDSGWTDVALAAPQKVDLLSLTNGVLADLGRNALPAGQYQQVRLVLAQNQGNTLANSIVPTGGTEQPLATPSATQSGYKIITPFTVQPNTLVDLVLDFNACKSIVQRGNGTYALKPVVTATPTVVSGAIDGYVSPTEAGATVYAEQNGHVIKGTLADSTGHFVLTPLVQSSTNGNYDIVITQNNVSTGIVRSVPVVVNTTTSVSTSSAPITLPASTMNMVSGTATASADAILRALQMVNSLPYEIASTNANLDTGAYALTLPTAAPIVGTYSGSLPVAMSAAPSAAGQYTIEADAANGATQQQPANITAGSVSNVNFGF	385	BPSL0093
BKP2_00041	KVDLLSLTNGVLADLGRNA	BPSL0093	81	MKTIWKFFGLAAAVSVLLAGCGGGGDNSGQTGTLHVAMTDAPSCGFDHIYVTVAKVRVNMSAQAGDNDSGWTDVALAAPQKVDLLSLTNGVLADLGRNALPAGQYQQVRLVLAQNQGNTLANSIVPTGGTEQPLATPSATQSGYKIITPFTVQPNTLVDLVLDFNACKSIVQRGNGTYALKPVVTATPTVVSGAIDGYVSPTEAGATVYAEQNGHVIKGTLADSTGHFVLTPLVQSSTNGNYDIVITQNNVSTGIVRSVPVVVNTTTSVSTSSAPITLPASTMNMVSGTATASADAILRALQMVNSLPYEIASTNANLDTGAYALTLPTAAPIVGTYSGSLPVAMSAAPSAAGQYTIEADAANGATQQQPANITAGSVSNVNFGF	385	BPSL0093
BKP2_00042	DLLSLTNGVLADLGRNALP	BPSL0093	83	MKTIWKFFGLAAAVSVLLAGCGGGGDNSGQTGTLHVAMTDAPSCGFDHIYVTVAKVRVNMSAQAGDNDSGWTDVALAAPQKVDLLSLTNGVLADLGRNALPAGQYQQVRLVLAQNQGNTLANSIVPTGGTEQPLATPSATQSGYKIITPFTVQPNTLVDLVLDFNACKSIVQRGNGTYALKPVVTATPTVVSGAIDGYVSPTEAGATVYAEQNGHVIKGTLADSTGHFVLTPLVQSSTNGNYDIVITQNNVSTGIVRSVPVVVNTTTSVSTSSAPITLPASTMNMVSGTATASADAILRALQMVNSLPYEIASTNANLDTGAYALTLPTAAPIVGTYSGSLPVAMSAAPSAAGQYTIEADAANGATQQQPANITAGSVSNVNFGF	385	BPSL0093
BKP2_00043	LSLTNGVLADLGRNALPAG	BPSL0093	85	MKTIWKFFGLAAAVSVLLAGCGGGGDNSGQTGTLHVAMTDAPSCGFDHIYVTVAKVRVNMSAQAGDNDSGWTDVALAAPQKVDLLSLTNGVLADLGRNALPAGQYQQVRLVLAQNQGNTLANSIVPTGGTEQPLATPSATQSGYKIITPFTVQPNTLVDLVLDFNACKSIVQRGNGTYALKPVVTATPTVVSGAIDGYVSPTEAGATVYAEQNGHVIKGTLADSTGHFVLTPLVQSSTNGNYDIVITQNNVSTGIVRSVPVVVNTTTSVSTSSAPITLPASTMNMVSGTATASADAILRALQMVNSLPYEIASTNANLDTGAYALTLPTAAPIVGTYSGSLPVAMSAAPSAAGQYTIEADAANGATQQQPANITAGSVSNVNFGF	385	BPSL0093
BKP2_00044	LTNGVLADLGRNALPAGQY	BPSL0093	87	MKTIWKFFGLAAAVSVLLAGCGGGGDNSGQTGTLHVAMTDAPSCGFDHIYVTVAKVRVNMSAQAGDNDSGWTDVALAAPQKVDLLSLTNGVLADLGRNALPAGQYQQVRLVLAQNQGNTLANSIVPTGGTEQPLATPSATQSGYKIITPFTVQPNTLVDLVLDFNACKSIVQRGNGTYALKPVVTATPTVVSGAIDGYVSPTEAGATVYAEQNGHVIKGTLADSTGHFVLTPLVQSSTNGNYDIVITQNNVSTGIVRSVPVVVNTTTSVSTSSAPITLPASTMNMVSGTATASADAILRALQMVNSLPYEIASTNANLDTGAYALTLPTAAPIVGTYSGSLPVAMSAAPSAAGQYTIEADAANGATQQQPANITAGSVSNVNFGF	385	BPSL0093
BKP2_00045	NGVLADLGRNALPAGQYQQ	BPSL0093	89	MKTIWKFFGLAAAVSVLLAGCGGGGDNSGQTGTLHVAMTDAPSCGFDHIYVTVAKVRVNMSAQAGDNDSGWTDVALAAPQKVDLLSLTNGVLADLGRNALPAGQYQQVRLVLAQNQGNTLANSIVPTGGTEQPLATPSATQSGYKIITPFTVQPNTLVDLVLDFNACKSIVQRGNGTYALKPVVTATPTVVSGAIDGYVSPTEAGATVYAEQNGHVIKGTLADSTGHFVLTPLVQSSTNGNYDIVITQNNVSTGIVRSVPVVVNTTTSVSTSSAPITLPASTMNMVSGTATASADAILRALQMVNSLPYEIASTNANLDTGAYALTLPTAAPIVGTYSGSLPVAMSAAPSAAGQYTIEADAANGATQQQPANITAGSVSNVNFGF	385	BPSL0093
BKP2_00046	VLADLGRNALPAGQYQQVR	BPSL0093	91	MKTIWKFFGLAAAVSVLLAGCGGGGDNSGQTGTLHVAMTDAPSCGFDHIYVTVAKVRVNMSAQAGDNDSGWTDVALAAPQKVDLLSLTNGVLADLGRNALPAGQYQQVRLVLAQNQGNTLANSIVPTGGTEQPLATPSATQSGYKIITPFTVQPNTLVDLVLDFNACKSIVQRGNGTYALKPVVTATPTVVSGAIDGYVSPTEAGATVYAEQNGHVIKGTLADSTGHFVLTPLVQSSTNGNYDIVITQNNVSTGIVRSVPVVVNTTTSVSTSSAPITLPASTMNMVSGTATASADAILRALQMVNSLPYEIASTNANLDTGAYALTLPTAAPIVGTYSGSLPVAMSAAPSAAGQYTIEADAANGATQQQPANITAGSVSNVNFGF	385	BPSL0093
BKP2_00047	ADLGRNALPAGQYQQVRLV	BPSL0093	93	MKTIWKFFGLAAAVSVLLAGCGGGGDNSGQTGTLHVAMTDAPSCGFDHIYVTVAKVRVNMSAQAGDNDSGWTDVALAAPQKVDLLSLTNGVLADLGRNALPAGQYQQVRLVLAQNQGNTLANSIVPTGGTEQPLATPSATQSGYKIITPFTVQPNTLVDLVLDFNACKSIVQRGNGTYALKPVVTATPTVVSGAIDGYVSPTEAGATVYAEQNGHVIKGTLADSTGHFVLTPLVQSSTNGNYDIVITQNNVSTGIVRSVPVVVNTTTSVSTSSAPITLPASTMNMVSGTATASADAILRALQMVNSLPYEIASTNANLDTGAYALTLPTAAPIVGTYSGSLPVAMSAAPSAAGQYTIEADAANGATQQQPANITAGSVSNVNFGF	385	BPSL0093
BKP2_00048	LGRNALPAGQYQQVRLVLA	BPSL0093	95	MKTIWKFFGLAAAVSVLLAGCGGGGDNSGQTGTLHVAMTDAPSCGFDHIYVTVAKVRVNMSAQAGDNDSGWTDVALAAPQKVDLLSLTNGVLADLGRNALPAGQYQQVRLVLAQNQGNTLANSIVPTGGTEQPLATPSATQSGYKIITPFTVQPNTLVDLVLDFNACKSIVQRGNGTYALKPVVTATPTVVSGAIDGYVSPTEAGATVYAEQNGHVIKGTLADSTGHFVLTPLVQSSTNGNYDIVITQNNVSTGIVRSVPVVVNTTTSVSTSSAPITLPASTMNMVSGTATASADAILRALQMVNSLPYEIASTNANLDTGAYALTLPTAAPIVGTYSGSLPVAMSAAPSAAGQYTIEADAANGATQQQPANITAGSVSNVNFGF	385	BPSL0093
BKP2_00049	RNALPAGQYQQVRLVLAQN	BPSL0093	97	MKTIWKFFGLAAAVSVLLAGCGGGGDNSGQTGTLHVAMTDAPSCGFDHIYVTVAKVRVNMSAQAGDNDSGWTDVALAAPQKVDLLSLTNGVLADLGRNALPAGQYQQVRLVLAQNQGNTLANSIVPTGGTEQPLATPSATQSGYKIITPFTVQPNTLVDLVLDFNACKSIVQRGNGTYALKPVVTATPTVVSGAIDGYVSPTEAGATVYAEQNGHVIKGTLADSTGHFVLTPLVQSSTNGNYDIVITQNNVSTGIVRSVPVVVNTTTSVSTSSAPITLPASTMNMVSGTATASADAILRALQMVNSLPYEIASTNANLDTGAYALTLPTAAPIVGTYSGSLPVAMSAAPSAAGQYTIEADAANGATQQQPANITAGSVSNVNFGF	385	BPSL0093
BKP2_00050	ALPAGQYQQVRLVLAQNQG	BPSL0093	99	MKTIWKFFGLAAAVSVLLAGCGGGGDNSGQTGTLHVAMTDAPSCGFDHIYVTVAKVRVNMSAQAGDNDSGWTDVALAAPQKVDLLSLTNGVLADLGRNALPAGQYQQVRLVLAQNQGNTLANSIVPTGGTEQPLATPSATQSGYKIITPFTVQPNTLVDLVLDFNACKSIVQRGNGTYALKPVVTATPTVVSGAIDGYVSPTEAGATVYAEQNGHVIKGTLADSTGHFVLTPLVQSSTNGNYDIVITQNNVSTGIVRSVPVVVNTTTSVSTSSAPITLPASTMNMVSGTATASADAILRALQMVNSLPYEIASTNANLDTGAYALTLPTAAPIVGTYSGSLPVAMSAAPSAAGQYTIEADAANGATQQQPANITAGSVSNVNFGF	385	BPSL0093
BKP2_00051	PAGQYQQVRLVLAQNQGNT	BPSL0093	101	MKTIWKFFGLAAAVSVLLAGCGGGGDNSGQTGTLHVAMTDAPSCGFDHIYVTVAKVRVNMSAQAGDNDSGWTDVALAAPQKVDLLSLTNGVLADLGRNALPAGQYQQVRLVLAQNQGNTLANSIVPTGGTEQPLATPSATQSGYKIITPFTVQPNTLVDLVLDFNACKSIVQRGNGTYALKPVVTATPTVVSGAIDGYVSPTEAGATVYAEQNGHVIKGTLADSTGHFVLTPLVQSSTNGNYDIVITQNNVSTGIVRSVPVVVNTTTSVSTSSAPITLPASTMNMVSGTATASADAILRALQMVNSLPYEIASTNANLDTGAYALTLPTAAPIVGTYSGSLPVAMSAAPSAAGQYTIEADAANGATQQQPANITAGSVSNVNFGF	385	BPSL0093
BKP2_00052	GQYQQVRLVLAQNQGNTLA	BPSL0093	103	MKTIWKFFGLAAAVSVLLAGCGGGGDNSGQTGTLHVAMTDAPSCGFDHIYVTVAKVRVNMSAQAGDNDSGWTDVALAAPQKVDLLSLTNGVLADLGRNALPAGQYQQVRLVLAQNQGNTLANSIVPTGGTEQPLATPSATQSGYKIITPFTVQPNTLVDLVLDFNACKSIVQRGNGTYALKPVVTATPTVVSGAIDGYVSPTEAGATVYAEQNGHVIKGTLADSTGHFVLTPLVQSSTNGNYDIVITQNNVSTGIVRSVPVVVNTTTSVSTSSAPITLPASTMNMVSGTATASADAILRALQMVNSLPYEIASTNANLDTGAYALTLPTAAPIVGTYSGSLPVAMSAAPSAAGQYTIEADAANGATQQQPANITAGSVSNVNFGF	385	BPSL0093
BKP2_00053	YQQVRLVLAQNQGNTLANS	BPSL0093	105	MKTIWKFFGLAAAVSVLLAGCGGGGDNSGQTGTLHVAMTDAPSCGFDHIYVTVAKVRVNMSAQAGDNDSGWTDVALAAPQKVDLLSLTNGVLADLGRNALPAGQYQQVRLVLAQNQGNTLANSIVPTGGTEQPLATPSATQSGYKIITPFTVQPNTLVDLVLDFNACKSIVQRGNGTYALKPVVTATPTVVSGAIDGYVSPTEAGATVYAEQNGHVIKGTLADSTGHFVLTPLVQSSTNGNYDIVITQNNVSTGIVRSVPVVVNTTTSVSTSSAPITLPASTMNMVSGTATASADAILRALQMVNSLPYEIASTNANLDTGAYALTLPTAAPIVGTYSGSLPVAMSAAPSAAGQYTIEADAANGATQQQPANITAGSVSNVNFGF	385	BPSL0093
BKP2_00054	QVRLVLAQNQGNTLANSIV	BPSL0093	107	MKTIWKFFGLAAAVSVLLAGCGGGGDNSGQTGTLHVAMTDAPSCGFDHIYVTVAKVRVNMSAQAGDNDSGWTDVALAAPQKVDLLSLTNGVLADLGRNALPAGQYQQVRLVLAQNQGNTLANSIVPTGGTEQPLATPSATQSGYKIITPFTVQPNTLVDLVLDFNACKSIVQRGNGTYALKPVVTATPTVVSGAIDGYVSPTEAGATVYAEQNGHVIKGTLADSTGHFVLTPLVQSSTNGNYDIVITQNNVSTGIVRSVPVVVNTTTSVSTSSAPITLPASTMNMVSGTATASADAILRALQMVNSLPYEIASTNANLDTGAYALTLPTAAPIVGTYSGSLPVAMSAAPSAAGQYTIEADAANGATQQQPANITAGSVSNVNFGF	385	BPSL0093
BKP2_00055	RLVLAQNQGNTLANSIVPT	BPSL0093	109	MKTIWKFFGLAAAVSVLLAGCGGGGDNSGQTGTLHVAMTDAPSCGFDHIYVTVAKVRVNMSAQAGDNDSGWTDVALAAPQKVDLLSLTNGVLADLGRNALPAGQYQQVRLVLAQNQGNTLANSIVPTGGTEQPLATPSATQSGYKIITPFTVQPNTLVDLVLDFNACKSIVQRGNGTYALKPVVTATPTVVSGAIDGYVSPTEAGATVYAEQNGHVIKGTLADSTGHFVLTPLVQSSTNGNYDIVITQNNVSTGIVRSVPVVVNTTTSVSTSSAPITLPASTMNMVSGTATASADAILRALQMVNSLPYEIASTNANLDTGAYALTLPTAAPIVGTYSGSLPVAMSAAPSAAGQYTIEADAANGATQQQPANITAGSVSNVNFGF	385	BPSL0093
BKP2_00056	VLAQNQGNTLANSIVPTGG	BPSL0093	111	MKTIWKFFGLAAAVSVLLAGCGGGGDNSGQTGTLHVAMTDAPSCGFDHIYVTVAKVRVNMSAQAGDNDSGWTDVALAAPQKVDLLSLTNGVLADLGRNALPAGQYQQVRLVLAQNQGNTLANSIVPTGGTEQPLATPSATQSGYKIITPFTVQPNTLVDLVLDFNACKSIVQRGNGTYALKPVVTATPTVVSGAIDGYVSPTEAGATVYAEQNGHVIKGTLADSTGHFVLTPLVQSSTNGNYDIVITQNNVSTGIVRSVPVVVNTTTSVSTSSAPITLPASTMNMVSGTATASADAILRALQMVNSLPYEIASTNANLDTGAYALTLPTAAPIVGTYSGSLPVAMSAAPSAAGQYTIEADAANGATQQQPANITAGSVSNVNFGF	385	BPSL0093
BKP2_00057	AQNQGNTLANSIVPTGGTE	BPSL0093	113	MKTIWKFFGLAAAVSVLLAGCGGGGDNSGQTGTLHVAMTDAPSCGFDHIYVTVAKVRVNMSAQAGDNDSGWTDVALAAPQKVDLLSLTNGVLADLGRNALPAGQYQQVRLVLAQNQGNTLANSIVPTGGTEQPLATPSATQSGYKIITPFTVQPNTLVDLVLDFNACKSIVQRGNGTYALKPVVTATPTVVSGAIDGYVSPTEAGATVYAEQNGHVIKGTLADSTGHFVLTPLVQSSTNGNYDIVITQNNVSTGIVRSVPVVVNTTTSVSTSSAPITLPASTMNMVSGTATASADAILRALQMVNSLPYEIASTNANLDTGAYALTLPTAAPIVGTYSGSLPVAMSAAPSAAGQYTIEADAANGATQQQPANITAGSVSNVNFGF	385	BPSL0093
BKP2_00058	NQGNTLANSIVPTGGTEQP	BPSL0093	115	MKTIWKFFGLAAAVSVLLAGCGGGGDNSGQTGTLHVAMTDAPSCGFDHIYVTVAKVRVNMSAQAGDNDSGWTDVALAAPQKVDLLSLTNGVLADLGRNALPAGQYQQVRLVLAQNQGNTLANSIVPTGGTEQPLATPSATQSGYKIITPFTVQPNTLVDLVLDFNACKSIVQRGNGTYALKPVVTATPTVVSGAIDGYVSPTEAGATVYAEQNGHVIKGTLADSTGHFVLTPLVQSSTNGNYDIVITQNNVSTGIVRSVPVVVNTTTSVSTSSAPITLPASTMNMVSGTATASADAILRALQMVNSLPYEIASTNANLDTGAYALTLPTAAPIVGTYSGSLPVAMSAAPSAAGQYTIEADAANGATQQQPANITAGSVSNVNFGF	385	BPSL0093
BKP2_00059	GNTLANSIVPTGGTEQPLA	BPSL0093	117	MKTIWKFFGLAAAVSVLLAGCGGGGDNSGQTGTLHVAMTDAPSCGFDHIYVTVAKVRVNMSAQAGDNDSGWTDVALAAPQKVDLLSLTNGVLADLGRNALPAGQYQQVRLVLAQNQGNTLANSIVPTGGTEQPLATPSATQSGYKIITPFTVQPNTLVDLVLDFNACKSIVQRGNGTYALKPVVTATPTVVSGAIDGYVSPTEAGATVYAEQNGHVIKGTLADSTGHFVLTPLVQSSTNGNYDIVITQNNVSTGIVRSVPVVVNTTTSVSTSSAPITLPASTMNMVSGTATASADAILRALQMVNSLPYEIASTNANLDTGAYALTLPTAAPIVGTYSGSLPVAMSAAPSAAGQYTIEADAANGATQQQPANITAGSVSNVNFGF	385	BPSL0093
BKP2_00060	TLANSIVPTGGTEQPLATP	BPSL0093	119	MKTIWKFFGLAAAVSVLLAGCGGGGDNSGQTGTLHVAMTDAPSCGFDHIYVTVAKVRVNMSAQAGDNDSGWTDVALAAPQKVDLLSLTNGVLADLGRNALPAGQYQQVRLVLAQNQGNTLANSIVPTGGTEQPLATPSATQSGYKIITPFTVQPNTLVDLVLDFNACKSIVQRGNGTYALKPVVTATPTVVSGAIDGYVSPTEAGATVYAEQNGHVIKGTLADSTGHFVLTPLVQSSTNGNYDIVITQNNVSTGIVRSVPVVVNTTTSVSTSSAPITLPASTMNMVSGTATASADAILRALQMVNSLPYEIASTNANLDTGAYALTLPTAAPIVGTYSGSLPVAMSAAPSAAGQYTIEADAANGATQQQPANITAGSVSNVNFGF	385	BPSL0093
BKP2_00061	ANSIVPTGGTEQPLATPSA	BPSL0093	121	MKTIWKFFGLAAAVSVLLAGCGGGGDNSGQTGTLHVAMTDAPSCGFDHIYVTVAKVRVNMSAQAGDNDSGWTDVALAAPQKVDLLSLTNGVLADLGRNALPAGQYQQVRLVLAQNQGNTLANSIVPTGGTEQPLATPSATQSGYKIITPFTVQPNTLVDLVLDFNACKSIVQRGNGTYALKPVVTATPTVVSGAIDGYVSPTEAGATVYAEQNGHVIKGTLADSTGHFVLTPLVQSSTNGNYDIVITQNNVSTGIVRSVPVVVNTTTSVSTSSAPITLPASTMNMVSGTATASADAILRALQMVNSLPYEIASTNANLDTGAYALTLPTAAPIVGTYSGSLPVAMSAAPSAAGQYTIEADAANGATQQQPANITAGSVSNVNFGF	385	BPSL0093
BKP2_00062	SIVPTGGTEQPLATPSATQ	BPSL0093	123	MKTIWKFFGLAAAVSVLLAGCGGGGDNSGQTGTLHVAMTDAPSCGFDHIYVTVAKVRVNMSAQAGDNDSGWTDVALAAPQKVDLLSLTNGVLADLGRNALPAGQYQQVRLVLAQNQGNTLANSIVPTGGTEQPLATPSATQSGYKIITPFTVQPNTLVDLVLDFNACKSIVQRGNGTYALKPVVTATPTVVSGAIDGYVSPTEAGATVYAEQNGHVIKGTLADSTGHFVLTPLVQSSTNGNYDIVITQNNVSTGIVRSVPVVVNTTTSVSTSSAPITLPASTMNMVSGTATASADAILRALQMVNSLPYEIASTNANLDTGAYALTLPTAAPIVGTYSGSLPVAMSAAPSAAGQYTIEADAANGATQQQPANITAGSVSNVNFGF	385	BPSL0093
BKP2_00063	VPTGGTEQPLATPSATQSG	BPSL0093	125	MKTIWKFFGLAAAVSVLLAGCGGGGDNSGQTGTLHVAMTDAPSCGFDHIYVTVAKVRVNMSAQAGDNDSGWTDVALAAPQKVDLLSLTNGVLADLGRNALPAGQYQQVRLVLAQNQGNTLANSIVPTGGTEQPLATPSATQSGYKIITPFTVQPNTLVDLVLDFNACKSIVQRGNGTYALKPVVTATPTVVSGAIDGYVSPTEAGATVYAEQNGHVIKGTLADSTGHFVLTPLVQSSTNGNYDIVITQNNVSTGIVRSVPVVVNTTTSVSTSSAPITLPASTMNMVSGTATASADAILRALQMVNSLPYEIASTNANLDTGAYALTLPTAAPIVGTYSGSLPVAMSAAPSAAGQYTIEADAANGATQQQPANITAGSVSNVNFGF	385	BPSL0093
BKP2_00064	TGGTEQPLATPSATQSGYK	BPSL0093	127	MKTIWKFFGLAAAVSVLLAGCGGGGDNSGQTGTLHVAMTDAPSCGFDHIYVTVAKVRVNMSAQAGDNDSGWTDVALAAPQKVDLLSLTNGVLADLGRNALPAGQYQQVRLVLAQNQGNTLANSIVPTGGTEQPLATPSATQSGYKIITPFTVQPNTLVDLVLDFNACKSIVQRGNGTYALKPVVTATPTVVSGAIDGYVSPTEAGATVYAEQNGHVIKGTLADSTGHFVLTPLVQSSTNGNYDIVITQNNVSTGIVRSVPVVVNTTTSVSTSSAPITLPASTMNMVSGTATASADAILRALQMVNSLPYEIASTNANLDTGAYALTLPTAAPIVGTYSGSLPVAMSAAPSAAGQYTIEADAANGATQQQPANITAGSVSNVNFGF	385	BPSL0093
BKP2_00065	GTEQPLATPSATQSGYKII	BPSL0093	129	MKTIWKFFGLAAAVSVLLAGCGGGGDNSGQTGTLHVAMTDAPSCGFDHIYVTVAKVRVNMSAQAGDNDSGWTDVALAAPQKVDLLSLTNGVLADLGRNALPAGQYQQVRLVLAQNQGNTLANSIVPTGGTEQPLATPSATQSGYKIITPFTVQPNTLVDLVLDFNACKSIVQRGNGTYALKPVVTATPTVVSGAIDGYVSPTEAGATVYAEQNGHVIKGTLADSTGHFVLTPLVQSSTNGNYDIVITQNNVSTGIVRSVPVVVNTTTSVSTSSAPITLPASTMNMVSGTATASADAILRALQMVNSLPYEIASTNANLDTGAYALTLPTAAPIVGTYSGSLPVAMSAAPSAAGQYTIEADAANGATQQQPANITAGSVSNVNFGF	385	BPSL0093
BKP2_00066	EQPLATPSATQSGYKIITP	BPSL0093	131	MKTIWKFFGLAAAVSVLLAGCGGGGDNSGQTGTLHVAMTDAPSCGFDHIYVTVAKVRVNMSAQAGDNDSGWTDVALAAPQKVDLLSLTNGVLADLGRNALPAGQYQQVRLVLAQNQGNTLANSIVPTGGTEQPLATPSATQSGYKIITPFTVQPNTLVDLVLDFNACKSIVQRGNGTYALKPVVTATPTVVSGAIDGYVSPTEAGATVYAEQNGHVIKGTLADSTGHFVLTPLVQSSTNGNYDIVITQNNVSTGIVRSVPVVVNTTTSVSTSSAPITLPASTMNMVSGTATASADAILRALQMVNSLPYEIASTNANLDTGAYALTLPTAAPIVGTYSGSLPVAMSAAPSAAGQYTIEADAANGATQQQPANITAGSVSNVNFGF	385	BPSL0093
BKP2_00067	PLATPSATQSGYKIITPFT	BPSL0093	133	MKTIWKFFGLAAAVSVLLAGCGGGGDNSGQTGTLHVAMTDAPSCGFDHIYVTVAKVRVNMSAQAGDNDSGWTDVALAAPQKVDLLSLTNGVLADLGRNALPAGQYQQVRLVLAQNQGNTLANSIVPTGGTEQPLATPSATQSGYKIITPFTVQPNTLVDLVLDFNACKSIVQRGNGTYALKPVVTATPTVVSGAIDGYVSPTEAGATVYAEQNGHVIKGTLADSTGHFVLTPLVQSSTNGNYDIVITQNNVSTGIVRSVPVVVNTTTSVSTSSAPITLPASTMNMVSGTATASADAILRALQMVNSLPYEIASTNANLDTGAYALTLPTAAPIVGTYSGSLPVAMSAAPSAAGQYTIEADAANGATQQQPANITAGSVSNVNFGF	385	BPSL0093
BKP2_00068	ATPSATQSGYKIITPFTVQ	BPSL0093	135	MKTIWKFFGLAAAVSVLLAGCGGGGDNSGQTGTLHVAMTDAPSCGFDHIYVTVAKVRVNMSAQAGDNDSGWTDVALAAPQKVDLLSLTNGVLADLGRNALPAGQYQQVRLVLAQNQGNTLANSIVPTGGTEQPLATPSATQSGYKIITPFTVQPNTLVDLVLDFNACKSIVQRGNGTYALKPVVTATPTVVSGAIDGYVSPTEAGATVYAEQNGHVIKGTLADSTGHFVLTPLVQSSTNGNYDIVITQNNVSTGIVRSVPVVVNTTTSVSTSSAPITLPASTMNMVSGTATASADAILRALQMVNSLPYEIASTNANLDTGAYALTLPTAAPIVGTYSGSLPVAMSAAPSAAGQYTIEADAANGATQQQPANITAGSVSNVNFGF	385	BPSL0093
BKP2_00069	PSATQSGYKIITPFTVQPN	BPSL0093	137	MKTIWKFFGLAAAVSVLLAGCGGGGDNSGQTGTLHVAMTDAPSCGFDHIYVTVAKVRVNMSAQAGDNDSGWTDVALAAPQKVDLLSLTNGVLADLGRNALPAGQYQQVRLVLAQNQGNTLANSIVPTGGTEQPLATPSATQSGYKIITPFTVQPNTLVDLVLDFNACKSIVQRGNGTYALKPVVTATPTVVSGAIDGYVSPTEAGATVYAEQNGHVIKGTLADSTGHFVLTPLVQSSTNGNYDIVITQNNVSTGIVRSVPVVVNTTTSVSTSSAPITLPASTMNMVSGTATASADAILRALQMVNSLPYEIASTNANLDTGAYALTLPTAAPIVGTYSGSLPVAMSAAPSAAGQYTIEADAANGATQQQPANITAGSVSNVNFGF	385	BPSL0093
BKP2_00070	ATQSGYKIITPFTVQPNTL	BPSL0093	139	MKTIWKFFGLAAAVSVLLAGCGGGGDNSGQTGTLHVAMTDAPSCGFDHIYVTVAKVRVNMSAQAGDNDSGWTDVALAAPQKVDLLSLTNGVLADLGRNALPAGQYQQVRLVLAQNQGNTLANSIVPTGGTEQPLATPSATQSGYKIITPFTVQPNTLVDLVLDFNACKSIVQRGNGTYALKPVVTATPTVVSGAIDGYVSPTEAGATVYAEQNGHVIKGTLADSTGHFVLTPLVQSSTNGNYDIVITQNNVSTGIVRSVPVVVNTTTSVSTSSAPITLPASTMNMVSGTATASADAILRALQMVNSLPYEIASTNANLDTGAYALTLPTAAPIVGTYSGSLPVAMSAAPSAAGQYTIEADAANGATQQQPANITAGSVSNVNFGF	385	BPSL0093
BKP2_00071	QSGYKIITPFTVQPNTLVD	BPSL0093	141	MKTIWKFFGLAAAVSVLLAGCGGGGDNSGQTGTLHVAMTDAPSCGFDHIYVTVAKVRVNMSAQAGDNDSGWTDVALAAPQKVDLLSLTNGVLADLGRNALPAGQYQQVRLVLAQNQGNTLANSIVPTGGTEQPLATPSATQSGYKIITPFTVQPNTLVDLVLDFNACKSIVQRGNGTYALKPVVTATPTVVSGAIDGYVSPTEAGATVYAEQNGHVIKGTLADSTGHFVLTPLVQSSTNGNYDIVITQNNVSTGIVRSVPVVVNTTTSVSTSSAPITLPASTMNMVSGTATASADAILRALQMVNSLPYEIASTNANLDTGAYALTLPTAAPIVGTYSGSLPVAMSAAPSAAGQYTIEADAANGATQQQPANITAGSVSNVNFGF	385	BPSL0093
BKP2_00072	GYKIITPFTVQPNTLVDLV	BPSL0093	143	MKTIWKFFGLAAAVSVLLAGCGGGGDNSGQTGTLHVAMTDAPSCGFDHIYVTVAKVRVNMSAQAGDNDSGWTDVALAAPQKVDLLSLTNGVLADLGRNALPAGQYQQVRLVLAQNQGNTLANSIVPTGGTEQPLATPSATQSGYKIITPFTVQPNTLVDLVLDFNACKSIVQRGNGTYALKPVVTATPTVVSGAIDGYVSPTEAGATVYAEQNGHVIKGTLADSTGHFVLTPLVQSSTNGNYDIVITQNNVSTGIVRSVPVVVNTTTSVSTSSAPITLPASTMNMVSGTATASADAILRALQMVNSLPYEIASTNANLDTGAYALTLPTAAPIVGTYSGSLPVAMSAAPSAAGQYTIEADAANGATQQQPANITAGSVSNVNFGF	385	BPSL0093
BKP2_00073	KIITPFTVQPNTLVDLVLD	BPSL0093	145	MKTIWKFFGLAAAVSVLLAGCGGGGDNSGQTGTLHVAMTDAPSCGFDHIYVTVAKVRVNMSAQAGDNDSGWTDVALAAPQKVDLLSLTNGVLADLGRNALPAGQYQQVRLVLAQNQGNTLANSIVPTGGTEQPLATPSATQSGYKIITPFTVQPNTLVDLVLDFNACKSIVQRGNGTYALKPVVTATPTVVSGAIDGYVSPTEAGATVYAEQNGHVIKGTLADSTGHFVLTPLVQSSTNGNYDIVITQNNVSTGIVRSVPVVVNTTTSVSTSSAPITLPASTMNMVSGTATASADAILRALQMVNSLPYEIASTNANLDTGAYALTLPTAAPIVGTYSGSLPVAMSAAPSAAGQYTIEADAANGATQQQPANITAGSVSNVNFGF	385	BPSL0093
BKP2_00074	ITPFTVQPNTLVDLVLDFN	BPSL0093	147	MKTIWKFFGLAAAVSVLLAGCGGGGDNSGQTGTLHVAMTDAPSCGFDHIYVTVAKVRVNMSAQAGDNDSGWTDVALAAPQKVDLLSLTNGVLADLGRNALPAGQYQQVRLVLAQNQGNTLANSIVPTGGTEQPLATPSATQSGYKIITPFTVQPNTLVDLVLDFNACKSIVQRGNGTYALKPVVTATPTVVSGAIDGYVSPTEAGATVYAEQNGHVIKGTLADSTGHFVLTPLVQSSTNGNYDIVITQNNVSTGIVRSVPVVVNTTTSVSTSSAPITLPASTMNMVSGTATASADAILRALQMVNSLPYEIASTNANLDTGAYALTLPTAAPIVGTYSGSLPVAMSAAPSAAGQYTIEADAANGATQQQPANITAGSVSNVNFGF	385	BPSL0093
BKP2_00075	PFTVQPNTLVDLVLDFNAC	BPSL0093	149	MKTIWKFFGLAAAVSVLLAGCGGGGDNSGQTGTLHVAMTDAPSCGFDHIYVTVAKVRVNMSAQAGDNDSGWTDVALAAPQKVDLLSLTNGVLADLGRNALPAGQYQQVRLVLAQNQGNTLANSIVPTGGTEQPLATPSATQSGYKIITPFTVQPNTLVDLVLDFNACKSIVQRGNGTYALKPVVTATPTVVSGAIDGYVSPTEAGATVYAEQNGHVIKGTLADSTGHFVLTPLVQSSTNGNYDIVITQNNVSTGIVRSVPVVVNTTTSVSTSSAPITLPASTMNMVSGTATASADAILRALQMVNSLPYEIASTNANLDTGAYALTLPTAAPIVGTYSGSLPVAMSAAPSAAGQYTIEADAANGATQQQPANITAGSVSNVNFGF	385	BPSL0093
BKP2_00076	TVQPNTLVDLVLDFNACKS	BPSL0093	151	MKTIWKFFGLAAAVSVLLAGCGGGGDNSGQTGTLHVAMTDAPSCGFDHIYVTVAKVRVNMSAQAGDNDSGWTDVALAAPQKVDLLSLTNGVLADLGRNALPAGQYQQVRLVLAQNQGNTLANSIVPTGGTEQPLATPSATQSGYKIITPFTVQPNTLVDLVLDFNACKSIVQRGNGTYALKPVVTATPTVVSGAIDGYVSPTEAGATVYAEQNGHVIKGTLADSTGHFVLTPLVQSSTNGNYDIVITQNNVSTGIVRSVPVVVNTTTSVSTSSAPITLPASTMNMVSGTATASADAILRALQMVNSLPYEIASTNANLDTGAYALTLPTAAPIVGTYSGSLPVAMSAAPSAAGQYTIEADAANGATQQQPANITAGSVSNVNFGF	385	BPSL0093
BKP2_00077	QPNTLVDLVLDFNACKSIV	BPSL0093	153	MKTIWKFFGLAAAVSVLLAGCGGGGDNSGQTGTLHVAMTDAPSCGFDHIYVTVAKVRVNMSAQAGDNDSGWTDVALAAPQKVDLLSLTNGVLADLGRNALPAGQYQQVRLVLAQNQGNTLANSIVPTGGTEQPLATPSATQSGYKIITPFTVQPNTLVDLVLDFNACKSIVQRGNGTYALKPVVTATPTVVSGAIDGYVSPTEAGATVYAEQNGHVIKGTLADSTGHFVLTPLVQSSTNGNYDIVITQNNVSTGIVRSVPVVVNTTTSVSTSSAPITLPASTMNMVSGTATASADAILRALQMVNSLPYEIASTNANLDTGAYALTLPTAAPIVGTYSGSLPVAMSAAPSAAGQYTIEADAANGATQQQPANITAGSVSNVNFGF	385	BPSL0093
BKP2_00078	NTLVDLVLDFNACKSIVQR	BPSL0093	155	MKTIWKFFGLAAAVSVLLAGCGGGGDNSGQTGTLHVAMTDAPSCGFDHIYVTVAKVRVNMSAQAGDNDSGWTDVALAAPQKVDLLSLTNGVLADLGRNALPAGQYQQVRLVLAQNQGNTLANSIVPTGGTEQPLATPSATQSGYKIITPFTVQPNTLVDLVLDFNACKSIVQRGNGTYALKPVVTATPTVVSGAIDGYVSPTEAGATVYAEQNGHVIKGTLADSTGHFVLTPLVQSSTNGNYDIVITQNNVSTGIVRSVPVVVNTTTSVSTSSAPITLPASTMNMVSGTATASADAILRALQMVNSLPYEIASTNANLDTGAYALTLPTAAPIVGTYSGSLPVAMSAAPSAAGQYTIEADAANGATQQQPANITAGSVSNVNFGF	385	BPSL0093
BKP2_00079	LVDLVLDFNACKSIVQRGN	BPSL0093	157	MKTIWKFFGLAAAVSVLLAGCGGGGDNSGQTGTLHVAMTDAPSCGFDHIYVTVAKVRVNMSAQAGDNDSGWTDVALAAPQKVDLLSLTNGVLADLGRNALPAGQYQQVRLVLAQNQGNTLANSIVPTGGTEQPLATPSATQSGYKIITPFTVQPNTLVDLVLDFNACKSIVQRGNGTYALKPVVTATPTVVSGAIDGYVSPTEAGATVYAEQNGHVIKGTLADSTGHFVLTPLVQSSTNGNYDIVITQNNVSTGIVRSVPVVVNTTTSVSTSSAPITLPASTMNMVSGTATASADAILRALQMVNSLPYEIASTNANLDTGAYALTLPTAAPIVGTYSGSLPVAMSAAPSAAGQYTIEADAANGATQQQPANITAGSVSNVNFGF	385	BPSL0093
BKP2_00080	DLVLDFNACKSIVQRGNGT	BPSL0093	159	MKTIWKFFGLAAAVSVLLAGCGGGGDNSGQTGTLHVAMTDAPSCGFDHIYVTVAKVRVNMSAQAGDNDSGWTDVALAAPQKVDLLSLTNGVLADLGRNALPAGQYQQVRLVLAQNQGNTLANSIVPTGGTEQPLATPSATQSGYKIITPFTVQPNTLVDLVLDFNACKSIVQRGNGTYALKPVVTATPTVVSGAIDGYVSPTEAGATVYAEQNGHVIKGTLADSTGHFVLTPLVQSSTNGNYDIVITQNNVSTGIVRSVPVVVNTTTSVSTSSAPITLPASTMNMVSGTATASADAILRALQMVNSLPYEIASTNANLDTGAYALTLPTAAPIVGTYSGSLPVAMSAAPSAAGQYTIEADAANGATQQQPANITAGSVSNVNFGF	385	BPSL0093
BKP2_00081	VLDFNACKSIVQRGNGTYA	BPSL0093	161	MKTIWKFFGLAAAVSVLLAGCGGGGDNSGQTGTLHVAMTDAPSCGFDHIYVTVAKVRVNMSAQAGDNDSGWTDVALAAPQKVDLLSLTNGVLADLGRNALPAGQYQQVRLVLAQNQGNTLANSIVPTGGTEQPLATPSATQSGYKIITPFTVQPNTLVDLVLDFNACKSIVQRGNGTYALKPVVTATPTVVSGAIDGYVSPTEAGATVYAEQNGHVIKGTLADSTGHFVLTPLVQSSTNGNYDIVITQNNVSTGIVRSVPVVVNTTTSVSTSSAPITLPASTMNMVSGTATASADAILRALQMVNSLPYEIASTNANLDTGAYALTLPTAAPIVGTYSGSLPVAMSAAPSAAGQYTIEADAANGATQQQPANITAGSVSNVNFGF	385	BPSL0093
BKP2_00082	DFNACKSIVQRGNGTYALK	BPSL0093	163	MKTIWKFFGLAAAVSVLLAGCGGGGDNSGQTGTLHVAMTDAPSCGFDHIYVTVAKVRVNMSAQAGDNDSGWTDVALAAPQKVDLLSLTNGVLADLGRNALPAGQYQQVRLVLAQNQGNTLANSIVPTGGTEQPLATPSATQSGYKIITPFTVQPNTLVDLVLDFNACKSIVQRGNGTYALKPVVTATPTVVSGAIDGYVSPTEAGATVYAEQNGHVIKGTLADSTGHFVLTPLVQSSTNGNYDIVITQNNVSTGIVRSVPVVVNTTTSVSTSSAPITLPASTMNMVSGTATASADAILRALQMVNSLPYEIASTNANLDTGAYALTLPTAAPIVGTYSGSLPVAMSAAPSAAGQYTIEADAANGATQQQPANITAGSVSNVNFGF	385	BPSL0093
BKP2_00083	NACKSIVQRGNGTYALKPV	BPSL0093	165	MKTIWKFFGLAAAVSVLLAGCGGGGDNSGQTGTLHVAMTDAPSCGFDHIYVTVAKVRVNMSAQAGDNDSGWTDVALAAPQKVDLLSLTNGVLADLGRNALPAGQYQQVRLVLAQNQGNTLANSIVPTGGTEQPLATPSATQSGYKIITPFTVQPNTLVDLVLDFNACKSIVQRGNGTYALKPVVTATPTVVSGAIDGYVSPTEAGATVYAEQNGHVIKGTLADSTGHFVLTPLVQSSTNGNYDIVITQNNVSTGIVRSVPVVVNTTTSVSTSSAPITLPASTMNMVSGTATASADAILRALQMVNSLPYEIASTNANLDTGAYALTLPTAAPIVGTYSGSLPVAMSAAPSAAGQYTIEADAANGATQQQPANITAGSVSNVNFGF	385	BPSL0093
BKP2_00084	CKSIVQRGNGTYALKPVVT	BPSL0093	167	MKTIWKFFGLAAAVSVLLAGCGGGGDNSGQTGTLHVAMTDAPSCGFDHIYVTVAKVRVNMSAQAGDNDSGWTDVALAAPQKVDLLSLTNGVLADLGRNALPAGQYQQVRLVLAQNQGNTLANSIVPTGGTEQPLATPSATQSGYKIITPFTVQPNTLVDLVLDFNACKSIVQRGNGTYALKPVVTATPTVVSGAIDGYVSPTEAGATVYAEQNGHVIKGTLADSTGHFVLTPLVQSSTNGNYDIVITQNNVSTGIVRSVPVVVNTTTSVSTSSAPITLPASTMNMVSGTATASADAILRALQMVNSLPYEIASTNANLDTGAYALTLPTAAPIVGTYSGSLPVAMSAAPSAAGQYTIEADAANGATQQQPANITAGSVSNVNFGF	385	BPSL0093
BKP2_00085	SIVQRGNGTYALKPVVTAT	BPSL0093	169	MKTIWKFFGLAAAVSVLLAGCGGGGDNSGQTGTLHVAMTDAPSCGFDHIYVTVAKVRVNMSAQAGDNDSGWTDVALAAPQKVDLLSLTNGVLADLGRNALPAGQYQQVRLVLAQNQGNTLANSIVPTGGTEQPLATPSATQSGYKIITPFTVQPNTLVDLVLDFNACKSIVQRGNGTYALKPVVTATPTVVSGAIDGYVSPTEAGATVYAEQNGHVIKGTLADSTGHFVLTPLVQSSTNGNYDIVITQNNVSTGIVRSVPVVVNTTTSVSTSSAPITLPASTMNMVSGTATASADAILRALQMVNSLPYEIASTNANLDTGAYALTLPTAAPIVGTYSGSLPVAMSAAPSAAGQYTIEADAANGATQQQPANITAGSVSNVNFGF	385	BPSL0093
BKP2_00086	VQRGNGTYALKPVVTATPT	BPSL0093	171	MKTIWKFFGLAAAVSVLLAGCGGGGDNSGQTGTLHVAMTDAPSCGFDHIYVTVAKVRVNMSAQAGDNDSGWTDVALAAPQKVDLLSLTNGVLADLGRNALPAGQYQQVRLVLAQNQGNTLANSIVPTGGTEQPLATPSATQSGYKIITPFTVQPNTLVDLVLDFNACKSIVQRGNGTYALKPVVTATPTVVSGAIDGYVSPTEAGATVYAEQNGHVIKGTLADSTGHFVLTPLVQSSTNGNYDIVITQNNVSTGIVRSVPVVVNTTTSVSTSSAPITLPASTMNMVSGTATASADAILRALQMVNSLPYEIASTNANLDTGAYALTLPTAAPIVGTYSGSLPVAMSAAPSAAGQYTIEADAANGATQQQPANITAGSVSNVNFGF	385	BPSL0093
BKP2_00087	RGNGTYALKPVVTATPTVV	BPSL0093	173	MKTIWKFFGLAAAVSVLLAGCGGGGDNSGQTGTLHVAMTDAPSCGFDHIYVTVAKVRVNMSAQAGDNDSGWTDVALAAPQKVDLLSLTNGVLADLGRNALPAGQYQQVRLVLAQNQGNTLANSIVPTGGTEQPLATPSATQSGYKIITPFTVQPNTLVDLVLDFNACKSIVQRGNGTYALKPVVTATPTVVSGAIDGYVSPTEAGATVYAEQNGHVIKGTLADSTGHFVLTPLVQSSTNGNYDIVITQNNVSTGIVRSVPVVVNTTTSVSTSSAPITLPASTMNMVSGTATASADAILRALQMVNSLPYEIASTNANLDTGAYALTLPTAAPIVGTYSGSLPVAMSAAPSAAGQYTIEADAANGATQQQPANITAGSVSNVNFGF	385	BPSL0093
BKP2_00088	NGTYALKPVVTATPTVVSG	BPSL0093	175	MKTIWKFFGLAAAVSVLLAGCGGGGDNSGQTGTLHVAMTDAPSCGFDHIYVTVAKVRVNMSAQAGDNDSGWTDVALAAPQKVDLLSLTNGVLADLGRNALPAGQYQQVRLVLAQNQGNTLANSIVPTGGTEQPLATPSATQSGYKIITPFTVQPNTLVDLVLDFNACKSIVQRGNGTYALKPVVTATPTVVSGAIDGYVSPTEAGATVYAEQNGHVIKGTLADSTGHFVLTPLVQSSTNGNYDIVITQNNVSTGIVRSVPVVVNTTTSVSTSSAPITLPASTMNMVSGTATASADAILRALQMVNSLPYEIASTNANLDTGAYALTLPTAAPIVGTYSGSLPVAMSAAPSAAGQYTIEADAANGATQQQPANITAGSVSNVNFGF	385	BPSL0093
BKP2_00089	TYALKPVVTATPTVVSGAI	BPSL0093	177	MKTIWKFFGLAAAVSVLLAGCGGGGDNSGQTGTLHVAMTDAPSCGFDHIYVTVAKVRVNMSAQAGDNDSGWTDVALAAPQKVDLLSLTNGVLADLGRNALPAGQYQQVRLVLAQNQGNTLANSIVPTGGTEQPLATPSATQSGYKIITPFTVQPNTLVDLVLDFNACKSIVQRGNGTYALKPVVTATPTVVSGAIDGYVSPTEAGATVYAEQNGHVIKGTLADSTGHFVLTPLVQSSTNGNYDIVITQNNVSTGIVRSVPVVVNTTTSVSTSSAPITLPASTMNMVSGTATASADAILRALQMVNSLPYEIASTNANLDTGAYALTLPTAAPIVGTYSGSLPVAMSAAPSAAGQYTIEADAANGATQQQPANITAGSVSNVNFGF	385	BPSL0093
BKP2_00090	ALKPVVTATPTVVSGAIDG	BPSL0093	179	MKTIWKFFGLAAAVSVLLAGCGGGGDNSGQTGTLHVAMTDAPSCGFDHIYVTVAKVRVNMSAQAGDNDSGWTDVALAAPQKVDLLSLTNGVLADLGRNALPAGQYQQVRLVLAQNQGNTLANSIVPTGGTEQPLATPSATQSGYKIITPFTVQPNTLVDLVLDFNACKSIVQRGNGTYALKPVVTATPTVVSGAIDGYVSPTEAGATVYAEQNGHVIKGTLADSTGHFVLTPLVQSSTNGNYDIVITQNNVSTGIVRSVPVVVNTTTSVSTSSAPITLPASTMNMVSGTATASADAILRALQMVNSLPYEIASTNANLDTGAYALTLPTAAPIVGTYSGSLPVAMSAAPSAAGQYTIEADAANGATQQQPANITAGSVSNVNFGF	385	BPSL0093
BKP2_00091	KPVVTATPTVVSGAIDGYV	BPSL0093	181	MKTIWKFFGLAAAVSVLLAGCGGGGDNSGQTGTLHVAMTDAPSCGFDHIYVTVAKVRVNMSAQAGDNDSGWTDVALAAPQKVDLLSLTNGVLADLGRNALPAGQYQQVRLVLAQNQGNTLANSIVPTGGTEQPLATPSATQSGYKIITPFTVQPNTLVDLVLDFNACKSIVQRGNGTYALKPVVTATPTVVSGAIDGYVSPTEAGATVYAEQNGHVIKGTLADSTGHFVLTPLVQSSTNGNYDIVITQNNVSTGIVRSVPVVVNTTTSVSTSSAPITLPASTMNMVSGTATASADAILRALQMVNSLPYEIASTNANLDTGAYALTLPTAAPIVGTYSGSLPVAMSAAPSAAGQYTIEADAANGATQQQPANITAGSVSNVNFGF	385	BPSL0093
BKP2_00092	VVTATPTVVSGAIDGYVSP	BPSL0093	183	MKTIWKFFGLAAAVSVLLAGCGGGGDNSGQTGTLHVAMTDAPSCGFDHIYVTVAKVRVNMSAQAGDNDSGWTDVALAAPQKVDLLSLTNGVLADLGRNALPAGQYQQVRLVLAQNQGNTLANSIVPTGGTEQPLATPSATQSGYKIITPFTVQPNTLVDLVLDFNACKSIVQRGNGTYALKPVVTATPTVVSGAIDGYVSPTEAGATVYAEQNGHVIKGTLADSTGHFVLTPLVQSSTNGNYDIVITQNNVSTGIVRSVPVVVNTTTSVSTSSAPITLPASTMNMVSGTATASADAILRALQMVNSLPYEIASTNANLDTGAYALTLPTAAPIVGTYSGSLPVAMSAAPSAAGQYTIEADAANGATQQQPANITAGSVSNVNFGF	385	BPSL0093
BKP2_00093	TATPTVVSGAIDGYVSPTE	BPSL0093	185	MKTIWKFFGLAAAVSVLLAGCGGGGDNSGQTGTLHVAMTDAPSCGFDHIYVTVAKVRVNMSAQAGDNDSGWTDVALAAPQKVDLLSLTNGVLADLGRNALPAGQYQQVRLVLAQNQGNTLANSIVPTGGTEQPLATPSATQSGYKIITPFTVQPNTLVDLVLDFNACKSIVQRGNGTYALKPVVTATPTVVSGAIDGYVSPTEAGATVYAEQNGHVIKGTLADSTGHFVLTPLVQSSTNGNYDIVITQNNVSTGIVRSVPVVVNTTTSVSTSSAPITLPASTMNMVSGTATASADAILRALQMVNSLPYEIASTNANLDTGAYALTLPTAAPIVGTYSGSLPVAMSAAPSAAGQYTIEADAANGATQQQPANITAGSVSNVNFGF	385	BPSL0093
BKP2_00094	TPTVVSGAIDGYVSPTEAG	BPSL0093	187	MKTIWKFFGLAAAVSVLLAGCGGGGDNSGQTGTLHVAMTDAPSCGFDHIYVTVAKVRVNMSAQAGDNDSGWTDVALAAPQKVDLLSLTNGVLADLGRNALPAGQYQQVRLVLAQNQGNTLANSIVPTGGTEQPLATPSATQSGYKIITPFTVQPNTLVDLVLDFNACKSIVQRGNGTYALKPVVTATPTVVSGAIDGYVSPTEAGATVYAEQNGHVIKGTLADSTGHFVLTPLVQSSTNGNYDIVITQNNVSTGIVRSVPVVVNTTTSVSTSSAPITLPASTMNMVSGTATASADAILRALQMVNSLPYEIASTNANLDTGAYALTLPTAAPIVGTYSGSLPVAMSAAPSAAGQYTIEADAANGATQQQPANITAGSVSNVNFGF	385	BPSL0093
BKP2_00095	TVVSGAIDGYVSPTEAGAT	BPSL0093	189	MKTIWKFFGLAAAVSVLLAGCGGGGDNSGQTGTLHVAMTDAPSCGFDHIYVTVAKVRVNMSAQAGDNDSGWTDVALAAPQKVDLLSLTNGVLADLGRNALPAGQYQQVRLVLAQNQGNTLANSIVPTGGTEQPLATPSATQSGYKIITPFTVQPNTLVDLVLDFNACKSIVQRGNGTYALKPVVTATPTVVSGAIDGYVSPTEAGATVYAEQNGHVIKGTLADSTGHFVLTPLVQSSTNGNYDIVITQNNVSTGIVRSVPVVVNTTTSVSTSSAPITLPASTMNMVSGTATASADAILRALQMVNSLPYEIASTNANLDTGAYALTLPTAAPIVGTYSGSLPVAMSAAPSAAGQYTIEADAANGATQQQPANITAGSVSNVNFGF	385	BPSL0093
BKP2_00096	VSGAIDGYVSPTEAGATVY	BPSL0093	191	MKTIWKFFGLAAAVSVLLAGCGGGGDNSGQTGTLHVAMTDAPSCGFDHIYVTVAKVRVNMSAQAGDNDSGWTDVALAAPQKVDLLSLTNGVLADLGRNALPAGQYQQVRLVLAQNQGNTLANSIVPTGGTEQPLATPSATQSGYKIITPFTVQPNTLVDLVLDFNACKSIVQRGNGTYALKPVVTATPTVVSGAIDGYVSPTEAGATVYAEQNGHVIKGTLADSTGHFVLTPLVQSSTNGNYDIVITQNNVSTGIVRSVPVVVNTTTSVSTSSAPITLPASTMNMVSGTATASADAILRALQMVNSLPYEIASTNANLDTGAYALTLPTAAPIVGTYSGSLPVAMSAAPSAAGQYTIEADAANGATQQQPANITAGSVSNVNFGF	385	BPSL0093
BKP2_00097	GAIDGYVSPTEAGATVYAE	BPSL0093	193	MKTIWKFFGLAAAVSVLLAGCGGGGDNSGQTGTLHVAMTDAPSCGFDHIYVTVAKVRVNMSAQAGDNDSGWTDVALAAPQKVDLLSLTNGVLADLGRNALPAGQYQQVRLVLAQNQGNTLANSIVPTGGTEQPLATPSATQSGYKIITPFTVQPNTLVDLVLDFNACKSIVQRGNGTYALKPVVTATPTVVSGAIDGYVSPTEAGATVYAEQNGHVIKGTLADSTGHFVLTPLVQSSTNGNYDIVITQNNVSTGIVRSVPVVVNTTTSVSTSSAPITLPASTMNMVSGTATASADAILRALQMVNSLPYEIASTNANLDTGAYALTLPTAAPIVGTYSGSLPVAMSAAPSAAGQYTIEADAANGATQQQPANITAGSVSNVNFGF	385	BPSL0093
BKP2_00098	IDGYVSPTEAGATVYAEQN	BPSL0093	195	MKTIWKFFGLAAAVSVLLAGCGGGGDNSGQTGTLHVAMTDAPSCGFDHIYVTVAKVRVNMSAQAGDNDSGWTDVALAAPQKVDLLSLTNGVLADLGRNALPAGQYQQVRLVLAQNQGNTLANSIVPTGGTEQPLATPSATQSGYKIITPFTVQPNTLVDLVLDFNACKSIVQRGNGTYALKPVVTATPTVVSGAIDGYVSPTEAGATVYAEQNGHVIKGTLADSTGHFVLTPLVQSSTNGNYDIVITQNNVSTGIVRSVPVVVNTTTSVSTSSAPITLPASTMNMVSGTATASADAILRALQMVNSLPYEIASTNANLDTGAYALTLPTAAPIVGTYSGSLPVAMSAAPSAAGQYTIEADAANGATQQQPANITAGSVSNVNFGF	385	BPSL0093
BKP2_00099	GYVSPTEAGATVYAEQNGH	BPSL0093	197	MKTIWKFFGLAAAVSVLLAGCGGGGDNSGQTGTLHVAMTDAPSCGFDHIYVTVAKVRVNMSAQAGDNDSGWTDVALAAPQKVDLLSLTNGVLADLGRNALPAGQYQQVRLVLAQNQGNTLANSIVPTGGTEQPLATPSATQSGYKIITPFTVQPNTLVDLVLDFNACKSIVQRGNGTYALKPVVTATPTVVSGAIDGYVSPTEAGATVYAEQNGHVIKGTLADSTGHFVLTPLVQSSTNGNYDIVITQNNVSTGIVRSVPVVVNTTTSVSTSSAPITLPASTMNMVSGTATASADAILRALQMVNSLPYEIASTNANLDTGAYALTLPTAAPIVGTYSGSLPVAMSAAPSAAGQYTIEADAANGATQQQPANITAGSVSNVNFGF	385	BPSL0093
BKP2_00100	VSPTEAGATVYAEQNGHVI	BPSL0093	199	MKTIWKFFGLAAAVSVLLAGCGGGGDNSGQTGTLHVAMTDAPSCGFDHIYVTVAKVRVNMSAQAGDNDSGWTDVALAAPQKVDLLSLTNGVLADLGRNALPAGQYQQVRLVLAQNQGNTLANSIVPTGGTEQPLATPSATQSGYKIITPFTVQPNTLVDLVLDFNACKSIVQRGNGTYALKPVVTATPTVVSGAIDGYVSPTEAGATVYAEQNGHVIKGTLADSTGHFVLTPLVQSSTNGNYDIVITQNNVSTGIVRSVPVVVNTTTSVSTSSAPITLPASTMNMVSGTATASADAILRALQMVNSLPYEIASTNANLDTGAYALTLPTAAPIVGTYSGSLPVAMSAAPSAAGQYTIEADAANGATQQQPANITAGSVSNVNFGF	385	BPSL0093
BKP2_00101	PTEAGATVYAEQNGHVIKG	BPSL0093	201	MKTIWKFFGLAAAVSVLLAGCGGGGDNSGQTGTLHVAMTDAPSCGFDHIYVTVAKVRVNMSAQAGDNDSGWTDVALAAPQKVDLLSLTNGVLADLGRNALPAGQYQQVRLVLAQNQGNTLANSIVPTGGTEQPLATPSATQSGYKIITPFTVQPNTLVDLVLDFNACKSIVQRGNGTYALKPVVTATPTVVSGAIDGYVSPTEAGATVYAEQNGHVIKGTLADSTGHFVLTPLVQSSTNGNYDIVITQNNVSTGIVRSVPVVVNTTTSVSTSSAPITLPASTMNMVSGTATASADAILRALQMVNSLPYEIASTNANLDTGAYALTLPTAAPIVGTYSGSLPVAMSAAPSAAGQYTIEADAANGATQQQPANITAGSVSNVNFGF	385	BPSL0093
BKP2_00102	EAGATVYAEQNGHVIKGTL	BPSL0093	203	MKTIWKFFGLAAAVSVLLAGCGGGGDNSGQTGTLHVAMTDAPSCGFDHIYVTVAKVRVNMSAQAGDNDSGWTDVALAAPQKVDLLSLTNGVLADLGRNALPAGQYQQVRLVLAQNQGNTLANSIVPTGGTEQPLATPSATQSGYKIITPFTVQPNTLVDLVLDFNACKSIVQRGNGTYALKPVVTATPTVVSGAIDGYVSPTEAGATVYAEQNGHVIKGTLADSTGHFVLTPLVQSSTNGNYDIVITQNNVSTGIVRSVPVVVNTTTSVSTSSAPITLPASTMNMVSGTATASADAILRALQMVNSLPYEIASTNANLDTGAYALTLPTAAPIVGTYSGSLPVAMSAAPSAAGQYTIEADAANGATQQQPANITAGSVSNVNFGF	385	BPSL0093
BKP2_00103	GATVYAEQNGHVIKGTLAD	BPSL0093	205	MKTIWKFFGLAAAVSVLLAGCGGGGDNSGQTGTLHVAMTDAPSCGFDHIYVTVAKVRVNMSAQAGDNDSGWTDVALAAPQKVDLLSLTNGVLADLGRNALPAGQYQQVRLVLAQNQGNTLANSIVPTGGTEQPLATPSATQSGYKIITPFTVQPNTLVDLVLDFNACKSIVQRGNGTYALKPVVTATPTVVSGAIDGYVSPTEAGATVYAEQNGHVIKGTLADSTGHFVLTPLVQSSTNGNYDIVITQNNVSTGIVRSVPVVVNTTTSVSTSSAPITLPASTMNMVSGTATASADAILRALQMVNSLPYEIASTNANLDTGAYALTLPTAAPIVGTYSGSLPVAMSAAPSAAGQYTIEADAANGATQQQPANITAGSVSNVNFGF	385	BPSL0093
BKP2_00104	TVYAEQNGHVIKGTLADST	BPSL0093	207	MKTIWKFFGLAAAVSVLLAGCGGGGDNSGQTGTLHVAMTDAPSCGFDHIYVTVAKVRVNMSAQAGDNDSGWTDVALAAPQKVDLLSLTNGVLADLGRNALPAGQYQQVRLVLAQNQGNTLANSIVPTGGTEQPLATPSATQSGYKIITPFTVQPNTLVDLVLDFNACKSIVQRGNGTYALKPVVTATPTVVSGAIDGYVSPTEAGATVYAEQNGHVIKGTLADSTGHFVLTPLVQSSTNGNYDIVITQNNVSTGIVRSVPVVVNTTTSVSTSSAPITLPASTMNMVSGTATASADAILRALQMVNSLPYEIASTNANLDTGAYALTLPTAAPIVGTYSGSLPVAMSAAPSAAGQYTIEADAANGATQQQPANITAGSVSNVNFGF	385	BPSL0093
BKP2_00105	YAEQNGHVIKGTLADSTGH	BPSL0093	209	MKTIWKFFGLAAAVSVLLAGCGGGGDNSGQTGTLHVAMTDAPSCGFDHIYVTVAKVRVNMSAQAGDNDSGWTDVALAAPQKVDLLSLTNGVLADLGRNALPAGQYQQVRLVLAQNQGNTLANSIVPTGGTEQPLATPSATQSGYKIITPFTVQPNTLVDLVLDFNACKSIVQRGNGTYALKPVVTATPTVVSGAIDGYVSPTEAGATVYAEQNGHVIKGTLADSTGHFVLTPLVQSSTNGNYDIVITQNNVSTGIVRSVPVVVNTTTSVSTSSAPITLPASTMNMVSGTATASADAILRALQMVNSLPYEIASTNANLDTGAYALTLPTAAPIVGTYSGSLPVAMSAAPSAAGQYTIEADAANGATQQQPANITAGSVSNVNFGF	385	BPSL0093
BKP2_00106	EQNGHVIKGTLADSTGHFV	BPSL0093	211	MKTIWKFFGLAAAVSVLLAGCGGGGDNSGQTGTLHVAMTDAPSCGFDHIYVTVAKVRVNMSAQAGDNDSGWTDVALAAPQKVDLLSLTNGVLADLGRNALPAGQYQQVRLVLAQNQGNTLANSIVPTGGTEQPLATPSATQSGYKIITPFTVQPNTLVDLVLDFNACKSIVQRGNGTYALKPVVTATPTVVSGAIDGYVSPTEAGATVYAEQNGHVIKGTLADSTGHFVLTPLVQSSTNGNYDIVITQNNVSTGIVRSVPVVVNTTTSVSTSSAPITLPASTMNMVSGTATASADAILRALQMVNSLPYEIASTNANLDTGAYALTLPTAAPIVGTYSGSLPVAMSAAPSAAGQYTIEADAANGATQQQPANITAGSVSNVNFGF	385	BPSL0093
BKP2_00107	NGHVIKGTLADSTGHFVLT	BPSL0093	213	MKTIWKFFGLAAAVSVLLAGCGGGGDNSGQTGTLHVAMTDAPSCGFDHIYVTVAKVRVNMSAQAGDNDSGWTDVALAAPQKVDLLSLTNGVLADLGRNALPAGQYQQVRLVLAQNQGNTLANSIVPTGGTEQPLATPSATQSGYKIITPFTVQPNTLVDLVLDFNACKSIVQRGNGTYALKPVVTATPTVVSGAIDGYVSPTEAGATVYAEQNGHVIKGTLADSTGHFVLTPLVQSSTNGNYDIVITQNNVSTGIVRSVPVVVNTTTSVSTSSAPITLPASTMNMVSGTATASADAILRALQMVNSLPYEIASTNANLDTGAYALTLPTAAPIVGTYSGSLPVAMSAAPSAAGQYTIEADAANGATQQQPANITAGSVSNVNFGF	385	BPSL0093
BKP2_00108	HVIKGTLADSTGHFVLTPL	BPSL0093	215	MKTIWKFFGLAAAVSVLLAGCGGGGDNSGQTGTLHVAMTDAPSCGFDHIYVTVAKVRVNMSAQAGDNDSGWTDVALAAPQKVDLLSLTNGVLADLGRNALPAGQYQQVRLVLAQNQGNTLANSIVPTGGTEQPLATPSATQSGYKIITPFTVQPNTLVDLVLDFNACKSIVQRGNGTYALKPVVTATPTVVSGAIDGYVSPTEAGATVYAEQNGHVIKGTLADSTGHFVLTPLVQSSTNGNYDIVITQNNVSTGIVRSVPVVVNTTTSVSTSSAPITLPASTMNMVSGTATASADAILRALQMVNSLPYEIASTNANLDTGAYALTLPTAAPIVGTYSGSLPVAMSAAPSAAGQYTIEADAANGATQQQPANITAGSVSNVNFGF	385	BPSL0093
BKP2_00109	IKGTLADSTGHFVLTPLVQ	BPSL0093	217	MKTIWKFFGLAAAVSVLLAGCGGGGDNSGQTGTLHVAMTDAPSCGFDHIYVTVAKVRVNMSAQAGDNDSGWTDVALAAPQKVDLLSLTNGVLADLGRNALPAGQYQQVRLVLAQNQGNTLANSIVPTGGTEQPLATPSATQSGYKIITPFTVQPNTLVDLVLDFNACKSIVQRGNGTYALKPVVTATPTVVSGAIDGYVSPTEAGATVYAEQNGHVIKGTLADSTGHFVLTPLVQSSTNGNYDIVITQNNVSTGIVRSVPVVVNTTTSVSTSSAPITLPASTMNMVSGTATASADAILRALQMVNSLPYEIASTNANLDTGAYALTLPTAAPIVGTYSGSLPVAMSAAPSAAGQYTIEADAANGATQQQPANITAGSVSNVNFGF	385	BPSL0093
BKP2_00110	GTLADSTGHFVLTPLVQSS	BPSL0093	219	MKTIWKFFGLAAAVSVLLAGCGGGGDNSGQTGTLHVAMTDAPSCGFDHIYVTVAKVRVNMSAQAGDNDSGWTDVALAAPQKVDLLSLTNGVLADLGRNALPAGQYQQVRLVLAQNQGNTLANSIVPTGGTEQPLATPSATQSGYKIITPFTVQPNTLVDLVLDFNACKSIVQRGNGTYALKPVVTATPTVVSGAIDGYVSPTEAGATVYAEQNGHVIKGTLADSTGHFVLTPLVQSSTNGNYDIVITQNNVSTGIVRSVPVVVNTTTSVSTSSAPITLPASTMNMVSGTATASADAILRALQMVNSLPYEIASTNANLDTGAYALTLPTAAPIVGTYSGSLPVAMSAAPSAAGQYTIEADAANGATQQQPANITAGSVSNVNFGF	385	BPSL0093
BKP2_00111	LADSTGHFVLTPLVQSSTN	BPSL0093	221	MKTIWKFFGLAAAVSVLLAGCGGGGDNSGQTGTLHVAMTDAPSCGFDHIYVTVAKVRVNMSAQAGDNDSGWTDVALAAPQKVDLLSLTNGVLADLGRNALPAGQYQQVRLVLAQNQGNTLANSIVPTGGTEQPLATPSATQSGYKIITPFTVQPNTLVDLVLDFNACKSIVQRGNGTYALKPVVTATPTVVSGAIDGYVSPTEAGATVYAEQNGHVIKGTLADSTGHFVLTPLVQSSTNGNYDIVITQNNVSTGIVRSVPVVVNTTTSVSTSSAPITLPASTMNMVSGTATASADAILRALQMVNSLPYEIASTNANLDTGAYALTLPTAAPIVGTYSGSLPVAMSAAPSAAGQYTIEADAANGATQQQPANITAGSVSNVNFGF	385	BPSL0093
BKP2_00112	DSTGHFVLTPLVQSSTNGN	BPSL0093	223	MKTIWKFFGLAAAVSVLLAGCGGGGDNSGQTGTLHVAMTDAPSCGFDHIYVTVAKVRVNMSAQAGDNDSGWTDVALAAPQKVDLLSLTNGVLADLGRNALPAGQYQQVRLVLAQNQGNTLANSIVPTGGTEQPLATPSATQSGYKIITPFTVQPNTLVDLVLDFNACKSIVQRGNGTYALKPVVTATPTVVSGAIDGYVSPTEAGATVYAEQNGHVIKGTLADSTGHFVLTPLVQSSTNGNYDIVITQNNVSTGIVRSVPVVVNTTTSVSTSSAPITLPASTMNMVSGTATASADAILRALQMVNSLPYEIASTNANLDTGAYALTLPTAAPIVGTYSGSLPVAMSAAPSAAGQYTIEADAANGATQQQPANITAGSVSNVNFGF	385	BPSL0093
BKP2_00113	TGHFVLTPLVQSSTNGNYD	BPSL0093	225	MKTIWKFFGLAAAVSVLLAGCGGGGDNSGQTGTLHVAMTDAPSCGFDHIYVTVAKVRVNMSAQAGDNDSGWTDVALAAPQKVDLLSLTNGVLADLGRNALPAGQYQQVRLVLAQNQGNTLANSIVPTGGTEQPLATPSATQSGYKIITPFTVQPNTLVDLVLDFNACKSIVQRGNGTYALKPVVTATPTVVSGAIDGYVSPTEAGATVYAEQNGHVIKGTLADSTGHFVLTPLVQSSTNGNYDIVITQNNVSTGIVRSVPVVVNTTTSVSTSSAPITLPASTMNMVSGTATASADAILRALQMVNSLPYEIASTNANLDTGAYALTLPTAAPIVGTYSGSLPVAMSAAPSAAGQYTIEADAANGATQQQPANITAGSVSNVNFGF	385	BPSL0093
BKP2_00114	HFVLTPLVQSSTNGNYDIV	BPSL0093	227	MKTIWKFFGLAAAVSVLLAGCGGGGDNSGQTGTLHVAMTDAPSCGFDHIYVTVAKVRVNMSAQAGDNDSGWTDVALAAPQKVDLLSLTNGVLADLGRNALPAGQYQQVRLVLAQNQGNTLANSIVPTGGTEQPLATPSATQSGYKIITPFTVQPNTLVDLVLDFNACKSIVQRGNGTYALKPVVTATPTVVSGAIDGYVSPTEAGATVYAEQNGHVIKGTLADSTGHFVLTPLVQSSTNGNYDIVITQNNVSTGIVRSVPVVVNTTTSVSTSSAPITLPASTMNMVSGTATASADAILRALQMVNSLPYEIASTNANLDTGAYALTLPTAAPIVGTYSGSLPVAMSAAPSAAGQYTIEADAANGATQQQPANITAGSVSNVNFGF	385	BPSL0093
BKP2_00115	VLTPLVQSSTNGNYDIVIT	BPSL0093	229	MKTIWKFFGLAAAVSVLLAGCGGGGDNSGQTGTLHVAMTDAPSCGFDHIYVTVAKVRVNMSAQAGDNDSGWTDVALAAPQKVDLLSLTNGVLADLGRNALPAGQYQQVRLVLAQNQGNTLANSIVPTGGTEQPLATPSATQSGYKIITPFTVQPNTLVDLVLDFNACKSIVQRGNGTYALKPVVTATPTVVSGAIDGYVSPTEAGATVYAEQNGHVIKGTLADSTGHFVLTPLVQSSTNGNYDIVITQNNVSTGIVRSVPVVVNTTTSVSTSSAPITLPASTMNMVSGTATASADAILRALQMVNSLPYEIASTNANLDTGAYALTLPTAAPIVGTYSGSLPVAMSAAPSAAGQYTIEADAANGATQQQPANITAGSVSNVNFGF	385	BPSL0093
BKP2_00116	TPLVQSSTNGNYDIVITQN	BPSL0093	231	MKTIWKFFGLAAAVSVLLAGCGGGGDNSGQTGTLHVAMTDAPSCGFDHIYVTVAKVRVNMSAQAGDNDSGWTDVALAAPQKVDLLSLTNGVLADLGRNALPAGQYQQVRLVLAQNQGNTLANSIVPTGGTEQPLATPSATQSGYKIITPFTVQPNTLVDLVLDFNACKSIVQRGNGTYALKPVVTATPTVVSGAIDGYVSPTEAGATVYAEQNGHVIKGTLADSTGHFVLTPLVQSSTNGNYDIVITQNNVSTGIVRSVPVVVNTTTSVSTSSAPITLPASTMNMVSGTATASADAILRALQMVNSLPYEIASTNANLDTGAYALTLPTAAPIVGTYSGSLPVAMSAAPSAAGQYTIEADAANGATQQQPANITAGSVSNVNFGF	385	BPSL0093
BKP2_00117	LVQSSTNGNYDIVITQNNV	BPSL0093	233	MKTIWKFFGLAAAVSVLLAGCGGGGDNSGQTGTLHVAMTDAPSCGFDHIYVTVAKVRVNMSAQAGDNDSGWTDVALAAPQKVDLLSLTNGVLADLGRNALPAGQYQQVRLVLAQNQGNTLANSIVPTGGTEQPLATPSATQSGYKIITPFTVQPNTLVDLVLDFNACKSIVQRGNGTYALKPVVTATPTVVSGAIDGYVSPTEAGATVYAEQNGHVIKGTLADSTGHFVLTPLVQSSTNGNYDIVITQNNVSTGIVRSVPVVVNTTTSVSTSSAPITLPASTMNMVSGTATASADAILRALQMVNSLPYEIASTNANLDTGAYALTLPTAAPIVGTYSGSLPVAMSAAPSAAGQYTIEADAANGATQQQPANITAGSVSNVNFGF	385	BPSL0093
BKP2_00118	QSSTNGNYDIVITQNNVST	BPSL0093	235	MKTIWKFFGLAAAVSVLLAGCGGGGDNSGQTGTLHVAMTDAPSCGFDHIYVTVAKVRVNMSAQAGDNDSGWTDVALAAPQKVDLLSLTNGVLADLGRNALPAGQYQQVRLVLAQNQGNTLANSIVPTGGTEQPLATPSATQSGYKIITPFTVQPNTLVDLVLDFNACKSIVQRGNGTYALKPVVTATPTVVSGAIDGYVSPTEAGATVYAEQNGHVIKGTLADSTGHFVLTPLVQSSTNGNYDIVITQNNVSTGIVRSVPVVVNTTTSVSTSSAPITLPASTMNMVSGTATASADAILRALQMVNSLPYEIASTNANLDTGAYALTLPTAAPIVGTYSGSLPVAMSAAPSAAGQYTIEADAANGATQQQPANITAGSVSNVNFGF	385	BPSL0093
BKP2_00119	STNGNYDIVITQNNVSTGI	BPSL0093	237	MKTIWKFFGLAAAVSVLLAGCGGGGDNSGQTGTLHVAMTDAPSCGFDHIYVTVAKVRVNMSAQAGDNDSGWTDVALAAPQKVDLLSLTNGVLADLGRNALPAGQYQQVRLVLAQNQGNTLANSIVPTGGTEQPLATPSATQSGYKIITPFTVQPNTLVDLVLDFNACKSIVQRGNGTYALKPVVTATPTVVSGAIDGYVSPTEAGATVYAEQNGHVIKGTLADSTGHFVLTPLVQSSTNGNYDIVITQNNVSTGIVRSVPVVVNTTTSVSTSSAPITLPASTMNMVSGTATASADAILRALQMVNSLPYEIASTNANLDTGAYALTLPTAAPIVGTYSGSLPVAMSAAPSAAGQYTIEADAANGATQQQPANITAGSVSNVNFGF	385	BPSL0093
BKP2_00120	NGNYDIVITQNNVSTGIVR	BPSL0093	239	MKTIWKFFGLAAAVSVLLAGCGGGGDNSGQTGTLHVAMTDAPSCGFDHIYVTVAKVRVNMSAQAGDNDSGWTDVALAAPQKVDLLSLTNGVLADLGRNALPAGQYQQVRLVLAQNQGNTLANSIVPTGGTEQPLATPSATQSGYKIITPFTVQPNTLVDLVLDFNACKSIVQRGNGTYALKPVVTATPTVVSGAIDGYVSPTEAGATVYAEQNGHVIKGTLADSTGHFVLTPLVQSSTNGNYDIVITQNNVSTGIVRSVPVVVNTTTSVSTSSAPITLPASTMNMVSGTATASADAILRALQMVNSLPYEIASTNANLDTGAYALTLPTAAPIVGTYSGSLPVAMSAAPSAAGQYTIEADAANGATQQQPANITAGSVSNVNFGF	385	BPSL0093
BKP2_00121	NYDIVITQNNVSTGIVRSV	BPSL0093	241	MKTIWKFFGLAAAVSVLLAGCGGGGDNSGQTGTLHVAMTDAPSCGFDHIYVTVAKVRVNMSAQAGDNDSGWTDVALAAPQKVDLLSLTNGVLADLGRNALPAGQYQQVRLVLAQNQGNTLANSIVPTGGTEQPLATPSATQSGYKIITPFTVQPNTLVDLVLDFNACKSIVQRGNGTYALKPVVTATPTVVSGAIDGYVSPTEAGATVYAEQNGHVIKGTLADSTGHFVLTPLVQSSTNGNYDIVITQNNVSTGIVRSVPVVVNTTTSVSTSSAPITLPASTMNMVSGTATASADAILRALQMVNSLPYEIASTNANLDTGAYALTLPTAAPIVGTYSGSLPVAMSAAPSAAGQYTIEADAANGATQQQPANITAGSVSNVNFGF	385	BPSL0093
BKP2_00122	DIVITQNNVSTGIVRSVPV	BPSL0093	243	MKTIWKFFGLAAAVSVLLAGCGGGGDNSGQTGTLHVAMTDAPSCGFDHIYVTVAKVRVNMSAQAGDNDSGWTDVALAAPQKVDLLSLTNGVLADLGRNALPAGQYQQVRLVLAQNQGNTLANSIVPTGGTEQPLATPSATQSGYKIITPFTVQPNTLVDLVLDFNACKSIVQRGNGTYALKPVVTATPTVVSGAIDGYVSPTEAGATVYAEQNGHVIKGTLADSTGHFVLTPLVQSSTNGNYDIVITQNNVSTGIVRSVPVVVNTTTSVSTSSAPITLPASTMNMVSGTATASADAILRALQMVNSLPYEIASTNANLDTGAYALTLPTAAPIVGTYSGSLPVAMSAAPSAAGQYTIEADAANGATQQQPANITAGSVSNVNFGF	385	BPSL0093
BKP2_00123	VITQNNVSTGIVRSVPVVV	BPSL0093	245	MKTIWKFFGLAAAVSVLLAGCGGGGDNSGQTGTLHVAMTDAPSCGFDHIYVTVAKVRVNMSAQAGDNDSGWTDVALAAPQKVDLLSLTNGVLADLGRNALPAGQYQQVRLVLAQNQGNTLANSIVPTGGTEQPLATPSATQSGYKIITPFTVQPNTLVDLVLDFNACKSIVQRGNGTYALKPVVTATPTVVSGAIDGYVSPTEAGATVYAEQNGHVIKGTLADSTGHFVLTPLVQSSTNGNYDIVITQNNVSTGIVRSVPVVVNTTTSVSTSSAPITLPASTMNMVSGTATASADAILRALQMVNSLPYEIASTNANLDTGAYALTLPTAAPIVGTYSGSLPVAMSAAPSAAGQYTIEADAANGATQQQPANITAGSVSNVNFGF	385	BPSL0093
BKP2_00124	TQNNVSTGIVRSVPVVVNT	BPSL0093	247	MKTIWKFFGLAAAVSVLLAGCGGGGDNSGQTGTLHVAMTDAPSCGFDHIYVTVAKVRVNMSAQAGDNDSGWTDVALAAPQKVDLLSLTNGVLADLGRNALPAGQYQQVRLVLAQNQGNTLANSIVPTGGTEQPLATPSATQSGYKIITPFTVQPNTLVDLVLDFNACKSIVQRGNGTYALKPVVTATPTVVSGAIDGYVSPTEAGATVYAEQNGHVIKGTLADSTGHFVLTPLVQSSTNGNYDIVITQNNVSTGIVRSVPVVVNTTTSVSTSSAPITLPASTMNMVSGTATASADAILRALQMVNSLPYEIASTNANLDTGAYALTLPTAAPIVGTYSGSLPVAMSAAPSAAGQYTIEADAANGATQQQPANITAGSVSNVNFGF	385	BPSL0093
BKP2_00125	NNVSTGIVRSVPVVVNTTT	BPSL0093	249	MKTIWKFFGLAAAVSVLLAGCGGGGDNSGQTGTLHVAMTDAPSCGFDHIYVTVAKVRVNMSAQAGDNDSGWTDVALAAPQKVDLLSLTNGVLADLGRNALPAGQYQQVRLVLAQNQGNTLANSIVPTGGTEQPLATPSATQSGYKIITPFTVQPNTLVDLVLDFNACKSIVQRGNGTYALKPVVTATPTVVSGAIDGYVSPTEAGATVYAEQNGHVIKGTLADSTGHFVLTPLVQSSTNGNYDIVITQNNVSTGIVRSVPVVVNTTTSVSTSSAPITLPASTMNMVSGTATASADAILRALQMVNSLPYEIASTNANLDTGAYALTLPTAAPIVGTYSGSLPVAMSAAPSAAGQYTIEADAANGATQQQPANITAGSVSNVNFGF	385	BPSL0093
BKP2_00126	VSTGIVRSVPVVVNTTTSV	BPSL0093	251	MKTIWKFFGLAAAVSVLLAGCGGGGDNSGQTGTLHVAMTDAPSCGFDHIYVTVAKVRVNMSAQAGDNDSGWTDVALAAPQKVDLLSLTNGVLADLGRNALPAGQYQQVRLVLAQNQGNTLANSIVPTGGTEQPLATPSATQSGYKIITPFTVQPNTLVDLVLDFNACKSIVQRGNGTYALKPVVTATPTVVSGAIDGYVSPTEAGATVYAEQNGHVIKGTLADSTGHFVLTPLVQSSTNGNYDIVITQNNVSTGIVRSVPVVVNTTTSVSTSSAPITLPASTMNMVSGTATASADAILRALQMVNSLPYEIASTNANLDTGAYALTLPTAAPIVGTYSGSLPVAMSAAPSAAGQYTIEADAANGATQQQPANITAGSVSNVNFGF	385	BPSL0093
BKP2_00127	TGIVRSVPVVVNTTTSVST	BPSL0093	253	MKTIWKFFGLAAAVSVLLAGCGGGGDNSGQTGTLHVAMTDAPSCGFDHIYVTVAKVRVNMSAQAGDNDSGWTDVALAAPQKVDLLSLTNGVLADLGRNALPAGQYQQVRLVLAQNQGNTLANSIVPTGGTEQPLATPSATQSGYKIITPFTVQPNTLVDLVLDFNACKSIVQRGNGTYALKPVVTATPTVVSGAIDGYVSPTEAGATVYAEQNGHVIKGTLADSTGHFVLTPLVQSSTNGNYDIVITQNNVSTGIVRSVPVVVNTTTSVSTSSAPITLPASTMNMVSGTATASADAILRALQMVNSLPYEIASTNANLDTGAYALTLPTAAPIVGTYSGSLPVAMSAAPSAAGQYTIEADAANGATQQQPANITAGSVSNVNFGF	385	BPSL0093
BKP2_00128	IVRSVPVVVNTTTSVSTSS	BPSL0093	255	MKTIWKFFGLAAAVSVLLAGCGGGGDNSGQTGTLHVAMTDAPSCGFDHIYVTVAKVRVNMSAQAGDNDSGWTDVALAAPQKVDLLSLTNGVLADLGRNALPAGQYQQVRLVLAQNQGNTLANSIVPTGGTEQPLATPSATQSGYKIITPFTVQPNTLVDLVLDFNACKSIVQRGNGTYALKPVVTATPTVVSGAIDGYVSPTEAGATVYAEQNGHVIKGTLADSTGHFVLTPLVQSSTNGNYDIVITQNNVSTGIVRSVPVVVNTTTSVSTSSAPITLPASTMNMVSGTATASADAILRALQMVNSLPYEIASTNANLDTGAYALTLPTAAPIVGTYSGSLPVAMSAAPSAAGQYTIEADAANGATQQQPANITAGSVSNVNFGF	385	BPSL0093
BKP2_00129	RSVPVVVNTTTSVSTSSAP	BPSL0093	257	MKTIWKFFGLAAAVSVLLAGCGGGGDNSGQTGTLHVAMTDAPSCGFDHIYVTVAKVRVNMSAQAGDNDSGWTDVALAAPQKVDLLSLTNGVLADLGRNALPAGQYQQVRLVLAQNQGNTLANSIVPTGGTEQPLATPSATQSGYKIITPFTVQPNTLVDLVLDFNACKSIVQRGNGTYALKPVVTATPTVVSGAIDGYVSPTEAGATVYAEQNGHVIKGTLADSTGHFVLTPLVQSSTNGNYDIVITQNNVSTGIVRSVPVVVNTTTSVSTSSAPITLPASTMNMVSGTATASADAILRALQMVNSLPYEIASTNANLDTGAYALTLPTAAPIVGTYSGSLPVAMSAAPSAAGQYTIEADAANGATQQQPANITAGSVSNVNFGF	385	BPSL0093
BKP2_00130	VPVVVNTTTSVSTSSAPIT	BPSL0093	259	MKTIWKFFGLAAAVSVLLAGCGGGGDNSGQTGTLHVAMTDAPSCGFDHIYVTVAKVRVNMSAQAGDNDSGWTDVALAAPQKVDLLSLTNGVLADLGRNALPAGQYQQVRLVLAQNQGNTLANSIVPTGGTEQPLATPSATQSGYKIITPFTVQPNTLVDLVLDFNACKSIVQRGNGTYALKPVVTATPTVVSGAIDGYVSPTEAGATVYAEQNGHVIKGTLADSTGHFVLTPLVQSSTNGNYDIVITQNNVSTGIVRSVPVVVNTTTSVSTSSAPITLPASTMNMVSGTATASADAILRALQMVNSLPYEIASTNANLDTGAYALTLPTAAPIVGTYSGSLPVAMSAAPSAAGQYTIEADAANGATQQQPANITAGSVSNVNFGF	385	BPSL0093
BKP2_00131	VVVNTTTSVSTSSAPITLP	BPSL0093	261	MKTIWKFFGLAAAVSVLLAGCGGGGDNSGQTGTLHVAMTDAPSCGFDHIYVTVAKVRVNMSAQAGDNDSGWTDVALAAPQKVDLLSLTNGVLADLGRNALPAGQYQQVRLVLAQNQGNTLANSIVPTGGTEQPLATPSATQSGYKIITPFTVQPNTLVDLVLDFNACKSIVQRGNGTYALKPVVTATPTVVSGAIDGYVSPTEAGATVYAEQNGHVIKGTLADSTGHFVLTPLVQSSTNGNYDIVITQNNVSTGIVRSVPVVVNTTTSVSTSSAPITLPASTMNMVSGTATASADAILRALQMVNSLPYEIASTNANLDTGAYALTLPTAAPIVGTYSGSLPVAMSAAPSAAGQYTIEADAANGATQQQPANITAGSVSNVNFGF	385	BPSL0093
BKP2_00132	VNTTTSVSTSSAPITLPAS	BPSL0093	263	MKTIWKFFGLAAAVSVLLAGCGGGGDNSGQTGTLHVAMTDAPSCGFDHIYVTVAKVRVNMSAQAGDNDSGWTDVALAAPQKVDLLSLTNGVLADLGRNALPAGQYQQVRLVLAQNQGNTLANSIVPTGGTEQPLATPSATQSGYKIITPFTVQPNTLVDLVLDFNACKSIVQRGNGTYALKPVVTATPTVVSGAIDGYVSPTEAGATVYAEQNGHVIKGTLADSTGHFVLTPLVQSSTNGNYDIVITQNNVSTGIVRSVPVVVNTTTSVSTSSAPITLPASTMNMVSGTATASADAILRALQMVNSLPYEIASTNANLDTGAYALTLPTAAPIVGTYSGSLPVAMSAAPSAAGQYTIEADAANGATQQQPANITAGSVSNVNFGF	385	BPSL0093
BKP2_00133	TTTSVSTSSAPITLPASTM	BPSL0093	265	MKTIWKFFGLAAAVSVLLAGCGGGGDNSGQTGTLHVAMTDAPSCGFDHIYVTVAKVRVNMSAQAGDNDSGWTDVALAAPQKVDLLSLTNGVLADLGRNALPAGQYQQVRLVLAQNQGNTLANSIVPTGGTEQPLATPSATQSGYKIITPFTVQPNTLVDLVLDFNACKSIVQRGNGTYALKPVVTATPTVVSGAIDGYVSPTEAGATVYAEQNGHVIKGTLADSTGHFVLTPLVQSSTNGNYDIVITQNNVSTGIVRSVPVVVNTTTSVSTSSAPITLPASTMNMVSGTATASADAILRALQMVNSLPYEIASTNANLDTGAYALTLPTAAPIVGTYSGSLPVAMSAAPSAAGQYTIEADAANGATQQQPANITAGSVSNVNFGF	385	BPSL0093
BKP2_00134	TSVSTSSAPITLPASTMNM	BPSL0093	267	MKTIWKFFGLAAAVSVLLAGCGGGGDNSGQTGTLHVAMTDAPSCGFDHIYVTVAKVRVNMSAQAGDNDSGWTDVALAAPQKVDLLSLTNGVLADLGRNALPAGQYQQVRLVLAQNQGNTLANSIVPTGGTEQPLATPSATQSGYKIITPFTVQPNTLVDLVLDFNACKSIVQRGNGTYALKPVVTATPTVVSGAIDGYVSPTEAGATVYAEQNGHVIKGTLADSTGHFVLTPLVQSSTNGNYDIVITQNNVSTGIVRSVPVVVNTTTSVSTSSAPITLPASTMNMVSGTATASADAILRALQMVNSLPYEIASTNANLDTGAYALTLPTAAPIVGTYSGSLPVAMSAAPSAAGQYTIEADAANGATQQQPANITAGSVSNVNFGF	385	BPSL0093
BKP2_00135	VSTSSAPITLPASTMNMVS	BPSL0093	269	MKTIWKFFGLAAAVSVLLAGCGGGGDNSGQTGTLHVAMTDAPSCGFDHIYVTVAKVRVNMSAQAGDNDSGWTDVALAAPQKVDLLSLTNGVLADLGRNALPAGQYQQVRLVLAQNQGNTLANSIVPTGGTEQPLATPSATQSGYKIITPFTVQPNTLVDLVLDFNACKSIVQRGNGTYALKPVVTATPTVVSGAIDGYVSPTEAGATVYAEQNGHVIKGTLADSTGHFVLTPLVQSSTNGNYDIVITQNNVSTGIVRSVPVVVNTTTSVSTSSAPITLPASTMNMVSGTATASADAILRALQMVNSLPYEIASTNANLDTGAYALTLPTAAPIVGTYSGSLPVAMSAAPSAAGQYTIEADAANGATQQQPANITAGSVSNVNFGF	385	BPSL0093
BKP2_00136	TSSAPITLPASTMNMVSGT	BPSL0093	271	MKTIWKFFGLAAAVSVLLAGCGGGGDNSGQTGTLHVAMTDAPSCGFDHIYVTVAKVRVNMSAQAGDNDSGWTDVALAAPQKVDLLSLTNGVLADLGRNALPAGQYQQVRLVLAQNQGNTLANSIVPTGGTEQPLATPSATQSGYKIITPFTVQPNTLVDLVLDFNACKSIVQRGNGTYALKPVVTATPTVVSGAIDGYVSPTEAGATVYAEQNGHVIKGTLADSTGHFVLTPLVQSSTNGNYDIVITQNNVSTGIVRSVPVVVNTTTSVSTSSAPITLPASTMNMVSGTATASADAILRALQMVNSLPYEIASTNANLDTGAYALTLPTAAPIVGTYSGSLPVAMSAAPSAAGQYTIEADAANGATQQQPANITAGSVSNVNFGF	385	BPSL0093
BKP2_00137	SAPITLPASTMNMVSGTAT	BPSL0093	273	MKTIWKFFGLAAAVSVLLAGCGGGGDNSGQTGTLHVAMTDAPSCGFDHIYVTVAKVRVNMSAQAGDNDSGWTDVALAAPQKVDLLSLTNGVLADLGRNALPAGQYQQVRLVLAQNQGNTLANSIVPTGGTEQPLATPSATQSGYKIITPFTVQPNTLVDLVLDFNACKSIVQRGNGTYALKPVVTATPTVVSGAIDGYVSPTEAGATVYAEQNGHVIKGTLADSTGHFVLTPLVQSSTNGNYDIVITQNNVSTGIVRSVPVVVNTTTSVSTSSAPITLPASTMNMVSGTATASADAILRALQMVNSLPYEIASTNANLDTGAYALTLPTAAPIVGTYSGSLPVAMSAAPSAAGQYTIEADAANGATQQQPANITAGSVSNVNFGF	385	BPSL0093
BKP2_00138	PITLPASTMNMVSGTATAS	BPSL0093	275	MKTIWKFFGLAAAVSVLLAGCGGGGDNSGQTGTLHVAMTDAPSCGFDHIYVTVAKVRVNMSAQAGDNDSGWTDVALAAPQKVDLLSLTNGVLADLGRNALPAGQYQQVRLVLAQNQGNTLANSIVPTGGTEQPLATPSATQSGYKIITPFTVQPNTLVDLVLDFNACKSIVQRGNGTYALKPVVTATPTVVSGAIDGYVSPTEAGATVYAEQNGHVIKGTLADSTGHFVLTPLVQSSTNGNYDIVITQNNVSTGIVRSVPVVVNTTTSVSTSSAPITLPASTMNMVSGTATASADAILRALQMVNSLPYEIASTNANLDTGAYALTLPTAAPIVGTYSGSLPVAMSAAPSAAGQYTIEADAANGATQQQPANITAGSVSNVNFGF	385	BPSL0093
BKP2_00139	TLPASTMNMVSGTATASAD	BPSL0093	277	MKTIWKFFGLAAAVSVLLAGCGGGGDNSGQTGTLHVAMTDAPSCGFDHIYVTVAKVRVNMSAQAGDNDSGWTDVALAAPQKVDLLSLTNGVLADLGRNALPAGQYQQVRLVLAQNQGNTLANSIVPTGGTEQPLATPSATQSGYKIITPFTVQPNTLVDLVLDFNACKSIVQRGNGTYALKPVVTATPTVVSGAIDGYVSPTEAGATVYAEQNGHVIKGTLADSTGHFVLTPLVQSSTNGNYDIVITQNNVSTGIVRSVPVVVNTTTSVSTSSAPITLPASTMNMVSGTATASADAILRALQMVNSLPYEIASTNANLDTGAYALTLPTAAPIVGTYSGSLPVAMSAAPSAAGQYTIEADAANGATQQQPANITAGSVSNVNFGF	385	BPSL0093
BKP2_00140	PASTMNMVSGTATASADAI	BPSL0093	279	MKTIWKFFGLAAAVSVLLAGCGGGGDNSGQTGTLHVAMTDAPSCGFDHIYVTVAKVRVNMSAQAGDNDSGWTDVALAAPQKVDLLSLTNGVLADLGRNALPAGQYQQVRLVLAQNQGNTLANSIVPTGGTEQPLATPSATQSGYKIITPFTVQPNTLVDLVLDFNACKSIVQRGNGTYALKPVVTATPTVVSGAIDGYVSPTEAGATVYAEQNGHVIKGTLADSTGHFVLTPLVQSSTNGNYDIVITQNNVSTGIVRSVPVVVNTTTSVSTSSAPITLPASTMNMVSGTATASADAILRALQMVNSLPYEIASTNANLDTGAYALTLPTAAPIVGTYSGSLPVAMSAAPSAAGQYTIEADAANGATQQQPANITAGSVSNVNFGF	385	BPSL0093
BKP2_00141	STMNMVSGTATASADAILR	BPSL0093	281	MKTIWKFFGLAAAVSVLLAGCGGGGDNSGQTGTLHVAMTDAPSCGFDHIYVTVAKVRVNMSAQAGDNDSGWTDVALAAPQKVDLLSLTNGVLADLGRNALPAGQYQQVRLVLAQNQGNTLANSIVPTGGTEQPLATPSATQSGYKIITPFTVQPNTLVDLVLDFNACKSIVQRGNGTYALKPVVTATPTVVSGAIDGYVSPTEAGATVYAEQNGHVIKGTLADSTGHFVLTPLVQSSTNGNYDIVITQNNVSTGIVRSVPVVVNTTTSVSTSSAPITLPASTMNMVSGTATASADAILRALQMVNSLPYEIASTNANLDTGAYALTLPTAAPIVGTYSGSLPVAMSAAPSAAGQYTIEADAANGATQQQPANITAGSVSNVNFGF	385	BPSL0093
BKP2_00142	MNMVSGTATASADAILRAL	BPSL0093	283	MKTIWKFFGLAAAVSVLLAGCGGGGDNSGQTGTLHVAMTDAPSCGFDHIYVTVAKVRVNMSAQAGDNDSGWTDVALAAPQKVDLLSLTNGVLADLGRNALPAGQYQQVRLVLAQNQGNTLANSIVPTGGTEQPLATPSATQSGYKIITPFTVQPNTLVDLVLDFNACKSIVQRGNGTYALKPVVTATPTVVSGAIDGYVSPTEAGATVYAEQNGHVIKGTLADSTGHFVLTPLVQSSTNGNYDIVITQNNVSTGIVRSVPVVVNTTTSVSTSSAPITLPASTMNMVSGTATASADAILRALQMVNSLPYEIASTNANLDTGAYALTLPTAAPIVGTYSGSLPVAMSAAPSAAGQYTIEADAANGATQQQPANITAGSVSNVNFGF	385	BPSL0093
BKP2_00143	MVSGTATASADAILRALQM	BPSL0093	285	MKTIWKFFGLAAAVSVLLAGCGGGGDNSGQTGTLHVAMTDAPSCGFDHIYVTVAKVRVNMSAQAGDNDSGWTDVALAAPQKVDLLSLTNGVLADLGRNALPAGQYQQVRLVLAQNQGNTLANSIVPTGGTEQPLATPSATQSGYKIITPFTVQPNTLVDLVLDFNACKSIVQRGNGTYALKPVVTATPTVVSGAIDGYVSPTEAGATVYAEQNGHVIKGTLADSTGHFVLTPLVQSSTNGNYDIVITQNNVSTGIVRSVPVVVNTTTSVSTSSAPITLPASTMNMVSGTATASADAILRALQMVNSLPYEIASTNANLDTGAYALTLPTAAPIVGTYSGSLPVAMSAAPSAAGQYTIEADAANGATQQQPANITAGSVSNVNFGF	385	BPSL0093
BKP2_00144	SGTATASADAILRALQMVN	BPSL0093	287	MKTIWKFFGLAAAVSVLLAGCGGGGDNSGQTGTLHVAMTDAPSCGFDHIYVTVAKVRVNMSAQAGDNDSGWTDVALAAPQKVDLLSLTNGVLADLGRNALPAGQYQQVRLVLAQNQGNTLANSIVPTGGTEQPLATPSATQSGYKIITPFTVQPNTLVDLVLDFNACKSIVQRGNGTYALKPVVTATPTVVSGAIDGYVSPTEAGATVYAEQNGHVIKGTLADSTGHFVLTPLVQSSTNGNYDIVITQNNVSTGIVRSVPVVVNTTTSVSTSSAPITLPASTMNMVSGTATASADAILRALQMVNSLPYEIASTNANLDTGAYALTLPTAAPIVGTYSGSLPVAMSAAPSAAGQYTIEADAANGATQQQPANITAGSVSNVNFGF	385	BPSL0093
BKP2_00145	TATASADAILRALQMVNSL	BPSL0093	289	MKTIWKFFGLAAAVSVLLAGCGGGGDNSGQTGTLHVAMTDAPSCGFDHIYVTVAKVRVNMSAQAGDNDSGWTDVALAAPQKVDLLSLTNGVLADLGRNALPAGQYQQVRLVLAQNQGNTLANSIVPTGGTEQPLATPSATQSGYKIITPFTVQPNTLVDLVLDFNACKSIVQRGNGTYALKPVVTATPTVVSGAIDGYVSPTEAGATVYAEQNGHVIKGTLADSTGHFVLTPLVQSSTNGNYDIVITQNNVSTGIVRSVPVVVNTTTSVSTSSAPITLPASTMNMVSGTATASADAILRALQMVNSLPYEIASTNANLDTGAYALTLPTAAPIVGTYSGSLPVAMSAAPSAAGQYTIEADAANGATQQQPANITAGSVSNVNFGF	385	BPSL0093
BKP2_00146	TASADAILRALQMVNSLPY	BPSL0093	291	MKTIWKFFGLAAAVSVLLAGCGGGGDNSGQTGTLHVAMTDAPSCGFDHIYVTVAKVRVNMSAQAGDNDSGWTDVALAAPQKVDLLSLTNGVLADLGRNALPAGQYQQVRLVLAQNQGNTLANSIVPTGGTEQPLATPSATQSGYKIITPFTVQPNTLVDLVLDFNACKSIVQRGNGTYALKPVVTATPTVVSGAIDGYVSPTEAGATVYAEQNGHVIKGTLADSTGHFVLTPLVQSSTNGNYDIVITQNNVSTGIVRSVPVVVNTTTSVSTSSAPITLPASTMNMVSGTATASADAILRALQMVNSLPYEIASTNANLDTGAYALTLPTAAPIVGTYSGSLPVAMSAAPSAAGQYTIEADAANGATQQQPANITAGSVSNVNFGF	385	BPSL0093
BKP2_00147	SADAILRALQMVNSLPYEI	BPSL0093	293	MKTIWKFFGLAAAVSVLLAGCGGGGDNSGQTGTLHVAMTDAPSCGFDHIYVTVAKVRVNMSAQAGDNDSGWTDVALAAPQKVDLLSLTNGVLADLGRNALPAGQYQQVRLVLAQNQGNTLANSIVPTGGTEQPLATPSATQSGYKIITPFTVQPNTLVDLVLDFNACKSIVQRGNGTYALKPVVTATPTVVSGAIDGYVSPTEAGATVYAEQNGHVIKGTLADSTGHFVLTPLVQSSTNGNYDIVITQNNVSTGIVRSVPVVVNTTTSVSTSSAPITLPASTMNMVSGTATASADAILRALQMVNSLPYEIASTNANLDTGAYALTLPTAAPIVGTYSGSLPVAMSAAPSAAGQYTIEADAANGATQQQPANITAGSVSNVNFGF	385	BPSL0093
BKP2_00148	DAILRALQMVNSLPYEIAS	BPSL0093	295	MKTIWKFFGLAAAVSVLLAGCGGGGDNSGQTGTLHVAMTDAPSCGFDHIYVTVAKVRVNMSAQAGDNDSGWTDVALAAPQKVDLLSLTNGVLADLGRNALPAGQYQQVRLVLAQNQGNTLANSIVPTGGTEQPLATPSATQSGYKIITPFTVQPNTLVDLVLDFNACKSIVQRGNGTYALKPVVTATPTVVSGAIDGYVSPTEAGATVYAEQNGHVIKGTLADSTGHFVLTPLVQSSTNGNYDIVITQNNVSTGIVRSVPVVVNTTTSVSTSSAPITLPASTMNMVSGTATASADAILRALQMVNSLPYEIASTNANLDTGAYALTLPTAAPIVGTYSGSLPVAMSAAPSAAGQYTIEADAANGATQQQPANITAGSVSNVNFGF	385	BPSL0093
BKP2_00149	ILRALQMVNSLPYEIASTN	BPSL0093	297	MKTIWKFFGLAAAVSVLLAGCGGGGDNSGQTGTLHVAMTDAPSCGFDHIYVTVAKVRVNMSAQAGDNDSGWTDVALAAPQKVDLLSLTNGVLADLGRNALPAGQYQQVRLVLAQNQGNTLANSIVPTGGTEQPLATPSATQSGYKIITPFTVQPNTLVDLVLDFNACKSIVQRGNGTYALKPVVTATPTVVSGAIDGYVSPTEAGATVYAEQNGHVIKGTLADSTGHFVLTPLVQSSTNGNYDIVITQNNVSTGIVRSVPVVVNTTTSVSTSSAPITLPASTMNMVSGTATASADAILRALQMVNSLPYEIASTNANLDTGAYALTLPTAAPIVGTYSGSLPVAMSAAPSAAGQYTIEADAANGATQQQPANITAGSVSNVNFGF	385	BPSL0093
BKP2_00150	RALQMVNSLPYEIASTNAN	BPSL0093	299	MKTIWKFFGLAAAVSVLLAGCGGGGDNSGQTGTLHVAMTDAPSCGFDHIYVTVAKVRVNMSAQAGDNDSGWTDVALAAPQKVDLLSLTNGVLADLGRNALPAGQYQQVRLVLAQNQGNTLANSIVPTGGTEQPLATPSATQSGYKIITPFTVQPNTLVDLVLDFNACKSIVQRGNGTYALKPVVTATPTVVSGAIDGYVSPTEAGATVYAEQNGHVIKGTLADSTGHFVLTPLVQSSTNGNYDIVITQNNVSTGIVRSVPVVVNTTTSVSTSSAPITLPASTMNMVSGTATASADAILRALQMVNSLPYEIASTNANLDTGAYALTLPTAAPIVGTYSGSLPVAMSAAPSAAGQYTIEADAANGATQQQPANITAGSVSNVNFGF	385	BPSL0093
BKP2_00151	LQMVNSLPYEIASTNANLD	BPSL0093	301	MKTIWKFFGLAAAVSVLLAGCGGGGDNSGQTGTLHVAMTDAPSCGFDHIYVTVAKVRVNMSAQAGDNDSGWTDVALAAPQKVDLLSLTNGVLADLGRNALPAGQYQQVRLVLAQNQGNTLANSIVPTGGTEQPLATPSATQSGYKIITPFTVQPNTLVDLVLDFNACKSIVQRGNGTYALKPVVTATPTVVSGAIDGYVSPTEAGATVYAEQNGHVIKGTLADSTGHFVLTPLVQSSTNGNYDIVITQNNVSTGIVRSVPVVVNTTTSVSTSSAPITLPASTMNMVSGTATASADAILRALQMVNSLPYEIASTNANLDTGAYALTLPTAAPIVGTYSGSLPVAMSAAPSAAGQYTIEADAANGATQQQPANITAGSVSNVNFGF	385	BPSL0093
BKP2_00152	MVNSLPYEIASTNANLDTG	BPSL0093	303	MKTIWKFFGLAAAVSVLLAGCGGGGDNSGQTGTLHVAMTDAPSCGFDHIYVTVAKVRVNMSAQAGDNDSGWTDVALAAPQKVDLLSLTNGVLADLGRNALPAGQYQQVRLVLAQNQGNTLANSIVPTGGTEQPLATPSATQSGYKIITPFTVQPNTLVDLVLDFNACKSIVQRGNGTYALKPVVTATPTVVSGAIDGYVSPTEAGATVYAEQNGHVIKGTLADSTGHFVLTPLVQSSTNGNYDIVITQNNVSTGIVRSVPVVVNTTTSVSTSSAPITLPASTMNMVSGTATASADAILRALQMVNSLPYEIASTNANLDTGAYALTLPTAAPIVGTYSGSLPVAMSAAPSAAGQYTIEADAANGATQQQPANITAGSVSNVNFGF	385	BPSL0093
BKP2_00153	NSLPYEIASTNANLDTGAY	BPSL0093	305	MKTIWKFFGLAAAVSVLLAGCGGGGDNSGQTGTLHVAMTDAPSCGFDHIYVTVAKVRVNMSAQAGDNDSGWTDVALAAPQKVDLLSLTNGVLADLGRNALPAGQYQQVRLVLAQNQGNTLANSIVPTGGTEQPLATPSATQSGYKIITPFTVQPNTLVDLVLDFNACKSIVQRGNGTYALKPVVTATPTVVSGAIDGYVSPTEAGATVYAEQNGHVIKGTLADSTGHFVLTPLVQSSTNGNYDIVITQNNVSTGIVRSVPVVVNTTTSVSTSSAPITLPASTMNMVSGTATASADAILRALQMVNSLPYEIASTNANLDTGAYALTLPTAAPIVGTYSGSLPVAMSAAPSAAGQYTIEADAANGATQQQPANITAGSVSNVNFGF	385	BPSL0093
BKP2_00154	LPYEIASTNANLDTGAYAL	BPSL0093	307	MKTIWKFFGLAAAVSVLLAGCGGGGDNSGQTGTLHVAMTDAPSCGFDHIYVTVAKVRVNMSAQAGDNDSGWTDVALAAPQKVDLLSLTNGVLADLGRNALPAGQYQQVRLVLAQNQGNTLANSIVPTGGTEQPLATPSATQSGYKIITPFTVQPNTLVDLVLDFNACKSIVQRGNGTYALKPVVTATPTVVSGAIDGYVSPTEAGATVYAEQNGHVIKGTLADSTGHFVLTPLVQSSTNGNYDIVITQNNVSTGIVRSVPVVVNTTTSVSTSSAPITLPASTMNMVSGTATASADAILRALQMVNSLPYEIASTNANLDTGAYALTLPTAAPIVGTYSGSLPVAMSAAPSAAGQYTIEADAANGATQQQPANITAGSVSNVNFGF	385	BPSL0093
BKP2_00155	YEIASTNANLDTGAYALTL	BPSL0093	309	MKTIWKFFGLAAAVSVLLAGCGGGGDNSGQTGTLHVAMTDAPSCGFDHIYVTVAKVRVNMSAQAGDNDSGWTDVALAAPQKVDLLSLTNGVLADLGRNALPAGQYQQVRLVLAQNQGNTLANSIVPTGGTEQPLATPSATQSGYKIITPFTVQPNTLVDLVLDFNACKSIVQRGNGTYALKPVVTATPTVVSGAIDGYVSPTEAGATVYAEQNGHVIKGTLADSTGHFVLTPLVQSSTNGNYDIVITQNNVSTGIVRSVPVVVNTTTSVSTSSAPITLPASTMNMVSGTATASADAILRALQMVNSLPYEIASTNANLDTGAYALTLPTAAPIVGTYSGSLPVAMSAAPSAAGQYTIEADAANGATQQQPANITAGSVSNVNFGF	385	BPSL0093
BKP2_00156	IASTNANLDTGAYALTLPT	BPSL0093	311	MKTIWKFFGLAAAVSVLLAGCGGGGDNSGQTGTLHVAMTDAPSCGFDHIYVTVAKVRVNMSAQAGDNDSGWTDVALAAPQKVDLLSLTNGVLADLGRNALPAGQYQQVRLVLAQNQGNTLANSIVPTGGTEQPLATPSATQSGYKIITPFTVQPNTLVDLVLDFNACKSIVQRGNGTYALKPVVTATPTVVSGAIDGYVSPTEAGATVYAEQNGHVIKGTLADSTGHFVLTPLVQSSTNGNYDIVITQNNVSTGIVRSVPVVVNTTTSVSTSSAPITLPASTMNMVSGTATASADAILRALQMVNSLPYEIASTNANLDTGAYALTLPTAAPIVGTYSGSLPVAMSAAPSAAGQYTIEADAANGATQQQPANITAGSVSNVNFGF	385	BPSL0093
BKP2_00157	STNANLDTGAYALTLPTAA	BPSL0093	313	MKTIWKFFGLAAAVSVLLAGCGGGGDNSGQTGTLHVAMTDAPSCGFDHIYVTVAKVRVNMSAQAGDNDSGWTDVALAAPQKVDLLSLTNGVLADLGRNALPAGQYQQVRLVLAQNQGNTLANSIVPTGGTEQPLATPSATQSGYKIITPFTVQPNTLVDLVLDFNACKSIVQRGNGTYALKPVVTATPTVVSGAIDGYVSPTEAGATVYAEQNGHVIKGTLADSTGHFVLTPLVQSSTNGNYDIVITQNNVSTGIVRSVPVVVNTTTSVSTSSAPITLPASTMNMVSGTATASADAILRALQMVNSLPYEIASTNANLDTGAYALTLPTAAPIVGTYSGSLPVAMSAAPSAAGQYTIEADAANGATQQQPANITAGSVSNVNFGF	385	BPSL0093
BKP2_00158	NANLDTGAYALTLPTAAPI	BPSL0093	315	MKTIWKFFGLAAAVSVLLAGCGGGGDNSGQTGTLHVAMTDAPSCGFDHIYVTVAKVRVNMSAQAGDNDSGWTDVALAAPQKVDLLSLTNGVLADLGRNALPAGQYQQVRLVLAQNQGNTLANSIVPTGGTEQPLATPSATQSGYKIITPFTVQPNTLVDLVLDFNACKSIVQRGNGTYALKPVVTATPTVVSGAIDGYVSPTEAGATVYAEQNGHVIKGTLADSTGHFVLTPLVQSSTNGNYDIVITQNNVSTGIVRSVPVVVNTTTSVSTSSAPITLPASTMNMVSGTATASADAILRALQMVNSLPYEIASTNANLDTGAYALTLPTAAPIVGTYSGSLPVAMSAAPSAAGQYTIEADAANGATQQQPANITAGSVSNVNFGF	385	BPSL0093
BKP2_00159	NLDTGAYALTLPTAAPIVG	BPSL0093	317	MKTIWKFFGLAAAVSVLLAGCGGGGDNSGQTGTLHVAMTDAPSCGFDHIYVTVAKVRVNMSAQAGDNDSGWTDVALAAPQKVDLLSLTNGVLADLGRNALPAGQYQQVRLVLAQNQGNTLANSIVPTGGTEQPLATPSATQSGYKIITPFTVQPNTLVDLVLDFNACKSIVQRGNGTYALKPVVTATPTVVSGAIDGYVSPTEAGATVYAEQNGHVIKGTLADSTGHFVLTPLVQSSTNGNYDIVITQNNVSTGIVRSVPVVVNTTTSVSTSSAPITLPASTMNMVSGTATASADAILRALQMVNSLPYEIASTNANLDTGAYALTLPTAAPIVGTYSGSLPVAMSAAPSAAGQYTIEADAANGATQQQPANITAGSVSNVNFGF	385	BPSL0093
BKP2_00160	DTGAYALTLPTAAPIVGTY	BPSL0093	319	MKTIWKFFGLAAAVSVLLAGCGGGGDNSGQTGTLHVAMTDAPSCGFDHIYVTVAKVRVNMSAQAGDNDSGWTDVALAAPQKVDLLSLTNGVLADLGRNALPAGQYQQVRLVLAQNQGNTLANSIVPTGGTEQPLATPSATQSGYKIITPFTVQPNTLVDLVLDFNACKSIVQRGNGTYALKPVVTATPTVVSGAIDGYVSPTEAGATVYAEQNGHVIKGTLADSTGHFVLTPLVQSSTNGNYDIVITQNNVSTGIVRSVPVVVNTTTSVSTSSAPITLPASTMNMVSGTATASADAILRALQMVNSLPYEIASTNANLDTGAYALTLPTAAPIVGTYSGSLPVAMSAAPSAAGQYTIEADAANGATQQQPANITAGSVSNVNFGF	385	BPSL0093
BKP2_00161	GAYALTLPTAAPIVGTYSG	BPSL0093	321	MKTIWKFFGLAAAVSVLLAGCGGGGDNSGQTGTLHVAMTDAPSCGFDHIYVTVAKVRVNMSAQAGDNDSGWTDVALAAPQKVDLLSLTNGVLADLGRNALPAGQYQQVRLVLAQNQGNTLANSIVPTGGTEQPLATPSATQSGYKIITPFTVQPNTLVDLVLDFNACKSIVQRGNGTYALKPVVTATPTVVSGAIDGYVSPTEAGATVYAEQNGHVIKGTLADSTGHFVLTPLVQSSTNGNYDIVITQNNVSTGIVRSVPVVVNTTTSVSTSSAPITLPASTMNMVSGTATASADAILRALQMVNSLPYEIASTNANLDTGAYALTLPTAAPIVGTYSGSLPVAMSAAPSAAGQYTIEADAANGATQQQPANITAGSVSNVNFGF	385	BPSL0093
BKP2_00162	YALTLPTAAPIVGTYSGSL	BPSL0093	323	MKTIWKFFGLAAAVSVLLAGCGGGGDNSGQTGTLHVAMTDAPSCGFDHIYVTVAKVRVNMSAQAGDNDSGWTDVALAAPQKVDLLSLTNGVLADLGRNALPAGQYQQVRLVLAQNQGNTLANSIVPTGGTEQPLATPSATQSGYKIITPFTVQPNTLVDLVLDFNACKSIVQRGNGTYALKPVVTATPTVVSGAIDGYVSPTEAGATVYAEQNGHVIKGTLADSTGHFVLTPLVQSSTNGNYDIVITQNNVSTGIVRSVPVVVNTTTSVSTSSAPITLPASTMNMVSGTATASADAILRALQMVNSLPYEIASTNANLDTGAYALTLPTAAPIVGTYSGSLPVAMSAAPSAAGQYTIEADAANGATQQQPANITAGSVSNVNFGF	385	BPSL0093
BKP2_00163	LTLPTAAPIVGTYSGSLPV	BPSL0093	325	MKTIWKFFGLAAAVSVLLAGCGGGGDNSGQTGTLHVAMTDAPSCGFDHIYVTVAKVRVNMSAQAGDNDSGWTDVALAAPQKVDLLSLTNGVLADLGRNALPAGQYQQVRLVLAQNQGNTLANSIVPTGGTEQPLATPSATQSGYKIITPFTVQPNTLVDLVLDFNACKSIVQRGNGTYALKPVVTATPTVVSGAIDGYVSPTEAGATVYAEQNGHVIKGTLADSTGHFVLTPLVQSSTNGNYDIVITQNNVSTGIVRSVPVVVNTTTSVSTSSAPITLPASTMNMVSGTATASADAILRALQMVNSLPYEIASTNANLDTGAYALTLPTAAPIVGTYSGSLPVAMSAAPSAAGQYTIEADAANGATQQQPANITAGSVSNVNFGF	385	BPSL0093
BKP2_00164	LPTAAPIVGTYSGSLPVAM	BPSL0093	327	MKTIWKFFGLAAAVSVLLAGCGGGGDNSGQTGTLHVAMTDAPSCGFDHIYVTVAKVRVNMSAQAGDNDSGWTDVALAAPQKVDLLSLTNGVLADLGRNALPAGQYQQVRLVLAQNQGNTLANSIVPTGGTEQPLATPSATQSGYKIITPFTVQPNTLVDLVLDFNACKSIVQRGNGTYALKPVVTATPTVVSGAIDGYVSPTEAGATVYAEQNGHVIKGTLADSTGHFVLTPLVQSSTNGNYDIVITQNNVSTGIVRSVPVVVNTTTSVSTSSAPITLPASTMNMVSGTATASADAILRALQMVNSLPYEIASTNANLDTGAYALTLPTAAPIVGTYSGSLPVAMSAAPSAAGQYTIEADAANGATQQQPANITAGSVSNVNFGF	385	BPSL0093
BKP2_00165	TAAPIVGTYSGSLPVAMSA	BPSL0093	329	MKTIWKFFGLAAAVSVLLAGCGGGGDNSGQTGTLHVAMTDAPSCGFDHIYVTVAKVRVNMSAQAGDNDSGWTDVALAAPQKVDLLSLTNGVLADLGRNALPAGQYQQVRLVLAQNQGNTLANSIVPTGGTEQPLATPSATQSGYKIITPFTVQPNTLVDLVLDFNACKSIVQRGNGTYALKPVVTATPTVVSGAIDGYVSPTEAGATVYAEQNGHVIKGTLADSTGHFVLTPLVQSSTNGNYDIVITQNNVSTGIVRSVPVVVNTTTSVSTSSAPITLPASTMNMVSGTATASADAILRALQMVNSLPYEIASTNANLDTGAYALTLPTAAPIVGTYSGSLPVAMSAAPSAAGQYTIEADAANGATQQQPANITAGSVSNVNFGF	385	BPSL0093
BKP2_00166	APIVGTYSGSLPVAMSAAP	BPSL0093	331	MKTIWKFFGLAAAVSVLLAGCGGGGDNSGQTGTLHVAMTDAPSCGFDHIYVTVAKVRVNMSAQAGDNDSGWTDVALAAPQKVDLLSLTNGVLADLGRNALPAGQYQQVRLVLAQNQGNTLANSIVPTGGTEQPLATPSATQSGYKIITPFTVQPNTLVDLVLDFNACKSIVQRGNGTYALKPVVTATPTVVSGAIDGYVSPTEAGATVYAEQNGHVIKGTLADSTGHFVLTPLVQSSTNGNYDIVITQNNVSTGIVRSVPVVVNTTTSVSTSSAPITLPASTMNMVSGTATASADAILRALQMVNSLPYEIASTNANLDTGAYALTLPTAAPIVGTYSGSLPVAMSAAPSAAGQYTIEADAANGATQQQPANITAGSVSNVNFGF	385	BPSL0093
BKP2_00167	IVGTYSGSLPVAMSAAPSA	BPSL0093	333	MKTIWKFFGLAAAVSVLLAGCGGGGDNSGQTGTLHVAMTDAPSCGFDHIYVTVAKVRVNMSAQAGDNDSGWTDVALAAPQKVDLLSLTNGVLADLGRNALPAGQYQQVRLVLAQNQGNTLANSIVPTGGTEQPLATPSATQSGYKIITPFTVQPNTLVDLVLDFNACKSIVQRGNGTYALKPVVTATPTVVSGAIDGYVSPTEAGATVYAEQNGHVIKGTLADSTGHFVLTPLVQSSTNGNYDIVITQNNVSTGIVRSVPVVVNTTTSVSTSSAPITLPASTMNMVSGTATASADAILRALQMVNSLPYEIASTNANLDTGAYALTLPTAAPIVGTYSGSLPVAMSAAPSAAGQYTIEADAANGATQQQPANITAGSVSNVNFGF	385	BPSL0093
BKP2_00168	GTYSGSLPVAMSAAPSAAG	BPSL0093	335	MKTIWKFFGLAAAVSVLLAGCGGGGDNSGQTGTLHVAMTDAPSCGFDHIYVTVAKVRVNMSAQAGDNDSGWTDVALAAPQKVDLLSLTNGVLADLGRNALPAGQYQQVRLVLAQNQGNTLANSIVPTGGTEQPLATPSATQSGYKIITPFTVQPNTLVDLVLDFNACKSIVQRGNGTYALKPVVTATPTVVSGAIDGYVSPTEAGATVYAEQNGHVIKGTLADSTGHFVLTPLVQSSTNGNYDIVITQNNVSTGIVRSVPVVVNTTTSVSTSSAPITLPASTMNMVSGTATASADAILRALQMVNSLPYEIASTNANLDTGAYALTLPTAAPIVGTYSGSLPVAMSAAPSAAGQYTIEADAANGATQQQPANITAGSVSNVNFGF	385	BPSL0093
BKP2_00169	YSGSLPVAMSAAPSAAGQY	BPSL0093	337	MKTIWKFFGLAAAVSVLLAGCGGGGDNSGQTGTLHVAMTDAPSCGFDHIYVTVAKVRVNMSAQAGDNDSGWTDVALAAPQKVDLLSLTNGVLADLGRNALPAGQYQQVRLVLAQNQGNTLANSIVPTGGTEQPLATPSATQSGYKIITPFTVQPNTLVDLVLDFNACKSIVQRGNGTYALKPVVTATPTVVSGAIDGYVSPTEAGATVYAEQNGHVIKGTLADSTGHFVLTPLVQSSTNGNYDIVITQNNVSTGIVRSVPVVVNTTTSVSTSSAPITLPASTMNMVSGTATASADAILRALQMVNSLPYEIASTNANLDTGAYALTLPTAAPIVGTYSGSLPVAMSAAPSAAGQYTIEADAANGATQQQPANITAGSVSNVNFGF	385	BPSL0093
BKP2_00170	GSLPVAMSAAPSAAGQYTI	BPSL0093	339	MKTIWKFFGLAAAVSVLLAGCGGGGDNSGQTGTLHVAMTDAPSCGFDHIYVTVAKVRVNMSAQAGDNDSGWTDVALAAPQKVDLLSLTNGVLADLGRNALPAGQYQQVRLVLAQNQGNTLANSIVPTGGTEQPLATPSATQSGYKIITPFTVQPNTLVDLVLDFNACKSIVQRGNGTYALKPVVTATPTVVSGAIDGYVSPTEAGATVYAEQNGHVIKGTLADSTGHFVLTPLVQSSTNGNYDIVITQNNVSTGIVRSVPVVVNTTTSVSTSSAPITLPASTMNMVSGTATASADAILRALQMVNSLPYEIASTNANLDTGAYALTLPTAAPIVGTYSGSLPVAMSAAPSAAGQYTIEADAANGATQQQPANITAGSVSNVNFGF	385	BPSL0093
BKP2_00171	LPVAMSAAPSAAGQYTIEA	BPSL0093	341	MKTIWKFFGLAAAVSVLLAGCGGGGDNSGQTGTLHVAMTDAPSCGFDHIYVTVAKVRVNMSAQAGDNDSGWTDVALAAPQKVDLLSLTNGVLADLGRNALPAGQYQQVRLVLAQNQGNTLANSIVPTGGTEQPLATPSATQSGYKIITPFTVQPNTLVDLVLDFNACKSIVQRGNGTYALKPVVTATPTVVSGAIDGYVSPTEAGATVYAEQNGHVIKGTLADSTGHFVLTPLVQSSTNGNYDIVITQNNVSTGIVRSVPVVVNTTTSVSTSSAPITLPASTMNMVSGTATASADAILRALQMVNSLPYEIASTNANLDTGAYALTLPTAAPIVGTYSGSLPVAMSAAPSAAGQYTIEADAANGATQQQPANITAGSVSNVNFGF	385	BPSL0093
BKP2_00172	VAMSAAPSAAGQYTIEADA	BPSL0093	343	MKTIWKFFGLAAAVSVLLAGCGGGGDNSGQTGTLHVAMTDAPSCGFDHIYVTVAKVRVNMSAQAGDNDSGWTDVALAAPQKVDLLSLTNGVLADLGRNALPAGQYQQVRLVLAQNQGNTLANSIVPTGGTEQPLATPSATQSGYKIITPFTVQPNTLVDLVLDFNACKSIVQRGNGTYALKPVVTATPTVVSGAIDGYVSPTEAGATVYAEQNGHVIKGTLADSTGHFVLTPLVQSSTNGNYDIVITQNNVSTGIVRSVPVVVNTTTSVSTSSAPITLPASTMNMVSGTATASADAILRALQMVNSLPYEIASTNANLDTGAYALTLPTAAPIVGTYSGSLPVAMSAAPSAAGQYTIEADAANGATQQQPANITAGSVSNVNFGF	385	BPSL0093
BKP2_00173	MSAAPSAAGQYTIEADAAN	BPSL0093	345	MKTIWKFFGLAAAVSVLLAGCGGGGDNSGQTGTLHVAMTDAPSCGFDHIYVTVAKVRVNMSAQAGDNDSGWTDVALAAPQKVDLLSLTNGVLADLGRNALPAGQYQQVRLVLAQNQGNTLANSIVPTGGTEQPLATPSATQSGYKIITPFTVQPNTLVDLVLDFNACKSIVQRGNGTYALKPVVTATPTVVSGAIDGYVSPTEAGATVYAEQNGHVIKGTLADSTGHFVLTPLVQSSTNGNYDIVITQNNVSTGIVRSVPVVVNTTTSVSTSSAPITLPASTMNMVSGTATASADAILRALQMVNSLPYEIASTNANLDTGAYALTLPTAAPIVGTYSGSLPVAMSAAPSAAGQYTIEADAANGATQQQPANITAGSVSNVNFGF	385	BPSL0093
BKP2_00174	AAPSAAGQYTIEADAANGA	BPSL0093	347	MKTIWKFFGLAAAVSVLLAGCGGGGDNSGQTGTLHVAMTDAPSCGFDHIYVTVAKVRVNMSAQAGDNDSGWTDVALAAPQKVDLLSLTNGVLADLGRNALPAGQYQQVRLVLAQNQGNTLANSIVPTGGTEQPLATPSATQSGYKIITPFTVQPNTLVDLVLDFNACKSIVQRGNGTYALKPVVTATPTVVSGAIDGYVSPTEAGATVYAEQNGHVIKGTLADSTGHFVLTPLVQSSTNGNYDIVITQNNVSTGIVRSVPVVVNTTTSVSTSSAPITLPASTMNMVSGTATASADAILRALQMVNSLPYEIASTNANLDTGAYALTLPTAAPIVGTYSGSLPVAMSAAPSAAGQYTIEADAANGATQQQPANITAGSVSNVNFGF	385	BPSL0093
BKP2_00175	PSAAGQYTIEADAANGATQ	BPSL0093	349	MKTIWKFFGLAAAVSVLLAGCGGGGDNSGQTGTLHVAMTDAPSCGFDHIYVTVAKVRVNMSAQAGDNDSGWTDVALAAPQKVDLLSLTNGVLADLGRNALPAGQYQQVRLVLAQNQGNTLANSIVPTGGTEQPLATPSATQSGYKIITPFTVQPNTLVDLVLDFNACKSIVQRGNGTYALKPVVTATPTVVSGAIDGYVSPTEAGATVYAEQNGHVIKGTLADSTGHFVLTPLVQSSTNGNYDIVITQNNVSTGIVRSVPVVVNTTTSVSTSSAPITLPASTMNMVSGTATASADAILRALQMVNSLPYEIASTNANLDTGAYALTLPTAAPIVGTYSGSLPVAMSAAPSAAGQYTIEADAANGATQQQPANITAGSVSNVNFGF	385	BPSL0093
BKP2_00176	AAGQYTIEADAANGATQQQ	BPSL0093	351	MKTIWKFFGLAAAVSVLLAGCGGGGDNSGQTGTLHVAMTDAPSCGFDHIYVTVAKVRVNMSAQAGDNDSGWTDVALAAPQKVDLLSLTNGVLADLGRNALPAGQYQQVRLVLAQNQGNTLANSIVPTGGTEQPLATPSATQSGYKIITPFTVQPNTLVDLVLDFNACKSIVQRGNGTYALKPVVTATPTVVSGAIDGYVSPTEAGATVYAEQNGHVIKGTLADSTGHFVLTPLVQSSTNGNYDIVITQNNVSTGIVRSVPVVVNTTTSVSTSSAPITLPASTMNMVSGTATASADAILRALQMVNSLPYEIASTNANLDTGAYALTLPTAAPIVGTYSGSLPVAMSAAPSAAGQYTIEADAANGATQQQPANITAGSVSNVNFGF	385	BPSL0093
BKP2_00177	GQYTIEADAANGATQQQPA	BPSL0093	353	MKTIWKFFGLAAAVSVLLAGCGGGGDNSGQTGTLHVAMTDAPSCGFDHIYVTVAKVRVNMSAQAGDNDSGWTDVALAAPQKVDLLSLTNGVLADLGRNALPAGQYQQVRLVLAQNQGNTLANSIVPTGGTEQPLATPSATQSGYKIITPFTVQPNTLVDLVLDFNACKSIVQRGNGTYALKPVVTATPTVVSGAIDGYVSPTEAGATVYAEQNGHVIKGTLADSTGHFVLTPLVQSSTNGNYDIVITQNNVSTGIVRSVPVVVNTTTSVSTSSAPITLPASTMNMVSGTATASADAILRALQMVNSLPYEIASTNANLDTGAYALTLPTAAPIVGTYSGSLPVAMSAAPSAAGQYTIEADAANGATQQQPANITAGSVSNVNFGF	385	BPSL0093
BKP2_00178	YTIEADAANGATQQQPANI	BPSL0093	355	MKTIWKFFGLAAAVSVLLAGCGGGGDNSGQTGTLHVAMTDAPSCGFDHIYVTVAKVRVNMSAQAGDNDSGWTDVALAAPQKVDLLSLTNGVLADLGRNALPAGQYQQVRLVLAQNQGNTLANSIVPTGGTEQPLATPSATQSGYKIITPFTVQPNTLVDLVLDFNACKSIVQRGNGTYALKPVVTATPTVVSGAIDGYVSPTEAGATVYAEQNGHVIKGTLADSTGHFVLTPLVQSSTNGNYDIVITQNNVSTGIVRSVPVVVNTTTSVSTSSAPITLPASTMNMVSGTATASADAILRALQMVNSLPYEIASTNANLDTGAYALTLPTAAPIVGTYSGSLPVAMSAAPSAAGQYTIEADAANGATQQQPANITAGSVSNVNFGF	385	BPSL0093
BKP2_00179	IEADAANGATQQQPANITA	BPSL0093	357	MKTIWKFFGLAAAVSVLLAGCGGGGDNSGQTGTLHVAMTDAPSCGFDHIYVTVAKVRVNMSAQAGDNDSGWTDVALAAPQKVDLLSLTNGVLADLGRNALPAGQYQQVRLVLAQNQGNTLANSIVPTGGTEQPLATPSATQSGYKIITPFTVQPNTLVDLVLDFNACKSIVQRGNGTYALKPVVTATPTVVSGAIDGYVSPTEAGATVYAEQNGHVIKGTLADSTGHFVLTPLVQSSTNGNYDIVITQNNVSTGIVRSVPVVVNTTTSVSTSSAPITLPASTMNMVSGTATASADAILRALQMVNSLPYEIASTNANLDTGAYALTLPTAAPIVGTYSGSLPVAMSAAPSAAGQYTIEADAANGATQQQPANITAGSVSNVNFGF	385	BPSL0093
BKP2_00180	ADAANGATQQQPANITAGS	BPSL0093	359	MKTIWKFFGLAAAVSVLLAGCGGGGDNSGQTGTLHVAMTDAPSCGFDHIYVTVAKVRVNMSAQAGDNDSGWTDVALAAPQKVDLLSLTNGVLADLGRNALPAGQYQQVRLVLAQNQGNTLANSIVPTGGTEQPLATPSATQSGYKIITPFTVQPNTLVDLVLDFNACKSIVQRGNGTYALKPVVTATPTVVSGAIDGYVSPTEAGATVYAEQNGHVIKGTLADSTGHFVLTPLVQSSTNGNYDIVITQNNVSTGIVRSVPVVVNTTTSVSTSSAPITLPASTMNMVSGTATASADAILRALQMVNSLPYEIASTNANLDTGAYALTLPTAAPIVGTYSGSLPVAMSAAPSAAGQYTIEADAANGATQQQPANITAGSVSNVNFGF	385	BPSL0093
BKP2_00181	AANGATQQQPANITAGSVS	BPSL0093	361	MKTIWKFFGLAAAVSVLLAGCGGGGDNSGQTGTLHVAMTDAPSCGFDHIYVTVAKVRVNMSAQAGDNDSGWTDVALAAPQKVDLLSLTNGVLADLGRNALPAGQYQQVRLVLAQNQGNTLANSIVPTGGTEQPLATPSATQSGYKIITPFTVQPNTLVDLVLDFNACKSIVQRGNGTYALKPVVTATPTVVSGAIDGYVSPTEAGATVYAEQNGHVIKGTLADSTGHFVLTPLVQSSTNGNYDIVITQNNVSTGIVRSVPVVVNTTTSVSTSSAPITLPASTMNMVSGTATASADAILRALQMVNSLPYEIASTNANLDTGAYALTLPTAAPIVGTYSGSLPVAMSAAPSAAGQYTIEADAANGATQQQPANITAGSVSNVNFGF	385	BPSL0093
BKP2_00182	NGATQQQPANITAGSVSNV	BPSL0093	363	MKTIWKFFGLAAAVSVLLAGCGGGGDNSGQTGTLHVAMTDAPSCGFDHIYVTVAKVRVNMSAQAGDNDSGWTDVALAAPQKVDLLSLTNGVLADLGRNALPAGQYQQVRLVLAQNQGNTLANSIVPTGGTEQPLATPSATQSGYKIITPFTVQPNTLVDLVLDFNACKSIVQRGNGTYALKPVVTATPTVVSGAIDGYVSPTEAGATVYAEQNGHVIKGTLADSTGHFVLTPLVQSSTNGNYDIVITQNNVSTGIVRSVPVVVNTTTSVSTSSAPITLPASTMNMVSGTATASADAILRALQMVNSLPYEIASTNANLDTGAYALTLPTAAPIVGTYSGSLPVAMSAAPSAAGQYTIEADAANGATQQQPANITAGSVSNVNFGF	385	BPSL0093
BKP2_00183	ATQQQPANITAGSVSNVNF	BPSL0093	365	MKTIWKFFGLAAAVSVLLAGCGGGGDNSGQTGTLHVAMTDAPSCGFDHIYVTVAKVRVNMSAQAGDNDSGWTDVALAAPQKVDLLSLTNGVLADLGRNALPAGQYQQVRLVLAQNQGNTLANSIVPTGGTEQPLATPSATQSGYKIITPFTVQPNTLVDLVLDFNACKSIVQRGNGTYALKPVVTATPTVVSGAIDGYVSPTEAGATVYAEQNGHVIKGTLADSTGHFVLTPLVQSSTNGNYDIVITQNNVSTGIVRSVPVVVNTTTSVSTSSAPITLPASTMNMVSGTATASADAILRALQMVNSLPYEIASTNANLDTGAYALTLPTAAPIVGTYSGSLPVAMSAAPSAAGQYTIEADAANGATQQQPANITAGSVSNVNFGF	385	BPSL0093
BKP2_00184	QQQPANITAGSVSNVNFGF	BPSL0093	367	MKTIWKFFGLAAAVSVLLAGCGGGGDNSGQTGTLHVAMTDAPSCGFDHIYVTVAKVRVNMSAQAGDNDSGWTDVALAAPQKVDLLSLTNGVLADLGRNALPAGQYQQVRLVLAQNQGNTLANSIVPTGGTEQPLATPSATQSGYKIITPFTVQPNTLVDLVLDFNACKSIVQRGNGTYALKPVVTATPTVVSGAIDGYVSPTEAGATVYAEQNGHVIKGTLADSTGHFVLTPLVQSSTNGNYDIVITQNNVSTGIVRSVPVVVNTTTSVSTSSAPITLPASTMNMVSGTATASADAILRALQMVNSLPYEIASTNANLDTGAYALTLPTAAPIVGTYSGSLPVAMSAAPSAAGQYTIEADAANGATQQQPANITAGSVSNVNFGF	385	BPSL0093
BKP2_00185	MSNTLMNLGVSGLNAALWG	BPSL0280	1	MSNTLMNLGVSGLNAALWGLTTTGQNISNAATPGYSVERPVYAEASGQYTSSGYLPQGVSTVTVERQYNQYLSNQLNAAQTQGSSLSTYYTLVAQLNNYVGSPTAGIATAITNYFTGLQTVANNAADPSARQTAMSNAQTLASQLVAAGQQYSQLRQSVNSQLTDTVTQINSYTSQIAQLNEQIASASSQGQPPNQLLDQRDLAVSKLSQLAGVQVVQSNGNYSVFLSGGQPLVVGNASYQLATVASPSDPSELTIVSKGVAGSAQPGPTQYLPDVSLTGGALGGLLAFRSQTLDPAQAQLGALAVSFASQVNAQNALGVDMSGNPGGSLFAVGAPAVYANQNNTGSATLSVSFVDGTQPTTSDYALSYDGAKYTLTDRATGSVVGTATPSSTPPTMTI…	667	BPSL0280
BKP2_00186	NTLMNLGVSGLNAALWGLT	BPSL0280	3	MSNTLMNLGVSGLNAALWGLTTTGQNISNAATPGYSVERPVYAEASGQYTSSGYLPQGVSTVTVERQYNQYLSNQLNAAQTQGSSLSTYYTLVAQLNNYVGSPTAGIATAITNYFTGLQTVANNAADPSARQTAMSNAQTLASQLVAAGQQYSQLRQSVNSQLTDTVTQINSYTSQIAQLNEQIASASSQGQPPNQLLDQRDLAVSKLSQLAGVQVVQSNGNYSVFLSGGQPLVVGNASYQLATVASPSDPSELTIVSKGVAGSAQPGPTQYLPDVSLTGGALGGLLAFRSQTLDPAQAQLGALAVSFASQVNAQNALGVDMSGNPGGSLFAVGAPAVYANQNNTGSATLSVSFVDGTQPTTSDYALSYDGAKYTLTDRATGSVVGTATPSSTPPTMTI…	667	BPSL0280
BKP2_00187	LMNLGVSGLNAALWGLTTT	BPSL0280	5	MSNTLMNLGVSGLNAALWGLTTTGQNISNAATPGYSVERPVYAEASGQYTSSGYLPQGVSTVTVERQYNQYLSNQLNAAQTQGSSLSTYYTLVAQLNNYVGSPTAGIATAITNYFTGLQTVANNAADPSARQTAMSNAQTLASQLVAAGQQYSQLRQSVNSQLTDTVTQINSYTSQIAQLNEQIASASSQGQPPNQLLDQRDLAVSKLSQLAGVQVVQSNGNYSVFLSGGQPLVVGNASYQLATVASPSDPSELTIVSKGVAGSAQPGPTQYLPDVSLTGGALGGLLAFRSQTLDPAQAQLGALAVSFASQVNAQNALGVDMSGNPGGSLFAVGAPAVYANQNNTGSATLSVSFVDGTQPTTSDYALSYDGAKYTLTDRATGSVVGTATPSSTPPTMTI…	667	BPSL0280
BKP2_00188	NLGVSGLNAALWGLTTTGQ	BPSL0280	7	MSNTLMNLGVSGLNAALWGLTTTGQNISNAATPGYSVERPVYAEASGQYTSSGYLPQGVSTVTVERQYNQYLSNQLNAAQTQGSSLSTYYTLVAQLNNYVGSPTAGIATAITNYFTGLQTVANNAADPSARQTAMSNAQTLASQLVAAGQQYSQLRQSVNSQLTDTVTQINSYTSQIAQLNEQIASASSQGQPPNQLLDQRDLAVSKLSQLAGVQVVQSNGNYSVFLSGGQPLVVGNASYQLATVASPSDPSELTIVSKGVAGSAQPGPTQYLPDVSLTGGALGGLLAFRSQTLDPAQAQLGALAVSFASQVNAQNALGVDMSGNPGGSLFAVGAPAVYANQNNTGSATLSVSFVDGTQPTTSDYALSYDGAKYTLTDRATGSVVGTATPSSTPPTMTI…	667	BPSL0280
BKP2_00189	GVSGLNAALWGLTTTGQNI	BPSL0280	9	MSNTLMNLGVSGLNAALWGLTTTGQNISNAATPGYSVERPVYAEASGQYTSSGYLPQGVSTVTVERQYNQYLSNQLNAAQTQGSSLSTYYTLVAQLNNYVGSPTAGIATAITNYFTGLQTVANNAADPSARQTAMSNAQTLASQLVAAGQQYSQLRQSVNSQLTDTVTQINSYTSQIAQLNEQIASASSQGQPPNQLLDQRDLAVSKLSQLAGVQVVQSNGNYSVFLSGGQPLVVGNASYQLATVASPSDPSELTIVSKGVAGSAQPGPTQYLPDVSLTGGALGGLLAFRSQTLDPAQAQLGALAVSFASQVNAQNALGVDMSGNPGGSLFAVGAPAVYANQNNTGSATLSVSFVDGTQPTTSDYALSYDGAKYTLTDRATGSVVGTATPSSTPPTMTI…	667	BPSL0280
BKP2_00190	SGLNAALWGLTTTGQNISN	BPSL0280	11	MSNTLMNLGVSGLNAALWGLTTTGQNISNAATPGYSVERPVYAEASGQYTSSGYLPQGVSTVTVERQYNQYLSNQLNAAQTQGSSLSTYYTLVAQLNNYVGSPTAGIATAITNYFTGLQTVANNAADPSARQTAMSNAQTLASQLVAAGQQYSQLRQSVNSQLTDTVTQINSYTSQIAQLNEQIASASSQGQPPNQLLDQRDLAVSKLSQLAGVQVVQSNGNYSVFLSGGQPLVVGNASYQLATVASPSDPSELTIVSKGVAGSAQPGPTQYLPDVSLTGGALGGLLAFRSQTLDPAQAQLGALAVSFASQVNAQNALGVDMSGNPGGSLFAVGAPAVYANQNNTGSATLSVSFVDGTQPTTSDYALSYDGAKYTLTDRATGSVVGTATPSSTPPTMTI…	667	BPSL0280
BKP2_00191	LNAALWGLTTTGQNISNAA	BPSL0280	13	MSNTLMNLGVSGLNAALWGLTTTGQNISNAATPGYSVERPVYAEASGQYTSSGYLPQGVSTVTVERQYNQYLSNQLNAAQTQGSSLSTYYTLVAQLNNYVGSPTAGIATAITNYFTGLQTVANNAADPSARQTAMSNAQTLASQLVAAGQQYSQLRQSVNSQLTDTVTQINSYTSQIAQLNEQIASASSQGQPPNQLLDQRDLAVSKLSQLAGVQVVQSNGNYSVFLSGGQPLVVGNASYQLATVASPSDPSELTIVSKGVAGSAQPGPTQYLPDVSLTGGALGGLLAFRSQTLDPAQAQLGALAVSFASQVNAQNALGVDMSGNPGGSLFAVGAPAVYANQNNTGSATLSVSFVDGTQPTTSDYALSYDGAKYTLTDRATGSVVGTATPSSTPPTMTI…	667	BPSL0280
BKP2_00192	AALWGLTTTGQNISNAATP	BPSL0280	15	MSNTLMNLGVSGLNAALWGLTTTGQNISNAATPGYSVERPVYAEASGQYTSSGYLPQGVSTVTVERQYNQYLSNQLNAAQTQGSSLSTYYTLVAQLNNYVGSPTAGIATAITNYFTGLQTVANNAADPSARQTAMSNAQTLASQLVAAGQQYSQLRQSVNSQLTDTVTQINSYTSQIAQLNEQIASASSQGQPPNQLLDQRDLAVSKLSQLAGVQVVQSNGNYSVFLSGGQPLVVGNASYQLATVASPSDPSELTIVSKGVAGSAQPGPTQYLPDVSLTGGALGGLLAFRSQTLDPAQAQLGALAVSFASQVNAQNALGVDMSGNPGGSLFAVGAPAVYANQNNTGSATLSVSFVDGTQPTTSDYALSYDGAKYTLTDRATGSVVGTATPSSTPPTMTI…	667	BPSL0280
BKP2_00193	LWGLTTTGQNISNAATPGY	BPSL0280	17	MSNTLMNLGVSGLNAALWGLTTTGQNISNAATPGYSVERPVYAEASGQYTSSGYLPQGVSTVTVERQYNQYLSNQLNAAQTQGSSLSTYYTLVAQLNNYVGSPTAGIATAITNYFTGLQTVANNAADPSARQTAMSNAQTLASQLVAAGQQYSQLRQSVNSQLTDTVTQINSYTSQIAQLNEQIASASSQGQPPNQLLDQRDLAVSKLSQLAGVQVVQSNGNYSVFLSGGQPLVVGNASYQLATVASPSDPSELTIVSKGVAGSAQPGPTQYLPDVSLTGGALGGLLAFRSQTLDPAQAQLGALAVSFASQVNAQNALGVDMSGNPGGSLFAVGAPAVYANQNNTGSATLSVSFVDGTQPTTSDYALSYDGAKYTLTDRATGSVVGTATPSSTPPTMTI…	667	BPSL0280
BKP2_00194	GLTTTGQNISNAATPGYSV	BPSL0280	19	MSNTLMNLGVSGLNAALWGLTTTGQNISNAATPGYSVERPVYAEASGQYTSSGYLPQGVSTVTVERQYNQYLSNQLNAAQTQGSSLSTYYTLVAQLNNYVGSPTAGIATAITNYFTGLQTVANNAADPSARQTAMSNAQTLASQLVAAGQQYSQLRQSVNSQLTDTVTQINSYTSQIAQLNEQIASASSQGQPPNQLLDQRDLAVSKLSQLAGVQVVQSNGNYSVFLSGGQPLVVGNASYQLATVASPSDPSELTIVSKGVAGSAQPGPTQYLPDVSLTGGALGGLLAFRSQTLDPAQAQLGALAVSFASQVNAQNALGVDMSGNPGGSLFAVGAPAVYANQNNTGSATLSVSFVDGTQPTTSDYALSYDGAKYTLTDRATGSVVGTATPSSTPPTMTI…	667	BPSL0280
BKP2_00195	TTTGQNISNAATPGYSVER	BPSL0280	21	MSNTLMNLGVSGLNAALWGLTTTGQNISNAATPGYSVERPVYAEASGQYTSSGYLPQGVSTVTVERQYNQYLSNQLNAAQTQGSSLSTYYTLVAQLNNYVGSPTAGIATAITNYFTGLQTVANNAADPSARQTAMSNAQTLASQLVAAGQQYSQLRQSVNSQLTDTVTQINSYTSQIAQLNEQIASASSQGQPPNQLLDQRDLAVSKLSQLAGVQVVQSNGNYSVFLSGGQPLVVGNASYQLATVASPSDPSELTIVSKGVAGSAQPGPTQYLPDVSLTGGALGGLLAFRSQTLDPAQAQLGALAVSFASQVNAQNALGVDMSGNPGGSLFAVGAPAVYANQNNTGSATLSVSFVDGTQPTTSDYALSYDGAKYTLTDRATGSVVGTATPSSTPPTMTI…	667	BPSL0280
BKP2_00196	TGQNISNAATPGYSVERPV	BPSL0280	23	MSNTLMNLGVSGLNAALWGLTTTGQNISNAATPGYSVERPVYAEASGQYTSSGYLPQGVSTVTVERQYNQYLSNQLNAAQTQGSSLSTYYTLVAQLNNYVGSPTAGIATAITNYFTGLQTVANNAADPSARQTAMSNAQTLASQLVAAGQQYSQLRQSVNSQLTDTVTQINSYTSQIAQLNEQIASASSQGQPPNQLLDQRDLAVSKLSQLAGVQVVQSNGNYSVFLSGGQPLVVGNASYQLATVASPSDPSELTIVSKGVAGSAQPGPTQYLPDVSLTGGALGGLLAFRSQTLDPAQAQLGALAVSFASQVNAQNALGVDMSGNPGGSLFAVGAPAVYANQNNTGSATLSVSFVDGTQPTTSDYALSYDGAKYTLTDRATGSVVGTATPSSTPPTMTI…	667	BPSL0280
BKP2_00197	QNISNAATPGYSVERPVYA	BPSL0280	25	MSNTLMNLGVSGLNAALWGLTTTGQNISNAATPGYSVERPVYAEASGQYTSSGYLPQGVSTVTVERQYNQYLSNQLNAAQTQGSSLSTYYTLVAQLNNYVGSPTAGIATAITNYFTGLQTVANNAADPSARQTAMSNAQTLASQLVAAGQQYSQLRQSVNSQLTDTVTQINSYTSQIAQLNEQIASASSQGQPPNQLLDQRDLAVSKLSQLAGVQVVQSNGNYSVFLSGGQPLVVGNASYQLATVASPSDPSELTIVSKGVAGSAQPGPTQYLPDVSLTGGALGGLLAFRSQTLDPAQAQLGALAVSFASQVNAQNALGVDMSGNPGGSLFAVGAPAVYANQNNTGSATLSVSFVDGTQPTTSDYALSYDGAKYTLTDRATGSVVGTATPSSTPPTMTI…	667	BPSL0280
BKP2_00198	ISNAATPGYSVERPVYAEA	BPSL0280	27	MSNTLMNLGVSGLNAALWGLTTTGQNISNAATPGYSVERPVYAEASGQYTSSGYLPQGVSTVTVERQYNQYLSNQLNAAQTQGSSLSTYYTLVAQLNNYVGSPTAGIATAITNYFTGLQTVANNAADPSARQTAMSNAQTLASQLVAAGQQYSQLRQSVNSQLTDTVTQINSYTSQIAQLNEQIASASSQGQPPNQLLDQRDLAVSKLSQLAGVQVVQSNGNYSVFLSGGQPLVVGNASYQLATVASPSDPSELTIVSKGVAGSAQPGPTQYLPDVSLTGGALGGLLAFRSQTLDPAQAQLGALAVSFASQVNAQNALGVDMSGNPGGSLFAVGAPAVYANQNNTGSATLSVSFVDGTQPTTSDYALSYDGAKYTLTDRATGSVVGTATPSSTPPTMTI…	667	BPSL0280
BKP2_00199	NAATPGYSVERPVYAEASG	BPSL0280	29	MSNTLMNLGVSGLNAALWGLTTTGQNISNAATPGYSVERPVYAEASGQYTSSGYLPQGVSTVTVERQYNQYLSNQLNAAQTQGSSLSTYYTLVAQLNNYVGSPTAGIATAITNYFTGLQTVANNAADPSARQTAMSNAQTLASQLVAAGQQYSQLRQSVNSQLTDTVTQINSYTSQIAQLNEQIASASSQGQPPNQLLDQRDLAVSKLSQLAGVQVVQSNGNYSVFLSGGQPLVVGNASYQLATVASPSDPSELTIVSKGVAGSAQPGPTQYLPDVSLTGGALGGLLAFRSQTLDPAQAQLGALAVSFASQVNAQNALGVDMSGNPGGSLFAVGAPAVYANQNNTGSATLSVSFVDGTQPTTSDYALSYDGAKYTLTDRATGSVVGTATPSSTPPTMTI…	667	BPSL0280
BKP2_00200	ATPGYSVERPVYAEASGQY	BPSL0280	31	MSNTLMNLGVSGLNAALWGLTTTGQNISNAATPGYSVERPVYAEASGQYTSSGYLPQGVSTVTVERQYNQYLSNQLNAAQTQGSSLSTYYTLVAQLNNYVGSPTAGIATAITNYFTGLQTVANNAADPSARQTAMSNAQTLASQLVAAGQQYSQLRQSVNSQLTDTVTQINSYTSQIAQLNEQIASASSQGQPPNQLLDQRDLAVSKLSQLAGVQVVQSNGNYSVFLSGGQPLVVGNASYQLATVASPSDPSELTIVSKGVAGSAQPGPTQYLPDVSLTGGALGGLLAFRSQTLDPAQAQLGALAVSFASQVNAQNALGVDMSGNPGGSLFAVGAPAVYANQNNTGSATLSVSFVDGTQPTTSDYALSYDGAKYTLTDRATGSVVGTATPSSTPPTMTI…	667	BPSL0280
BKP2_00201	PGYSVERPVYAEASGQYTS	BPSL0280	33	MSNTLMNLGVSGLNAALWGLTTTGQNISNAATPGYSVERPVYAEASGQYTSSGYLPQGVSTVTVERQYNQYLSNQLNAAQTQGSSLSTYYTLVAQLNNYVGSPTAGIATAITNYFTGLQTVANNAADPSARQTAMSNAQTLASQLVAAGQQYSQLRQSVNSQLTDTVTQINSYTSQIAQLNEQIASASSQGQPPNQLLDQRDLAVSKLSQLAGVQVVQSNGNYSVFLSGGQPLVVGNASYQLATVASPSDPSELTIVSKGVAGSAQPGPTQYLPDVSLTGGALGGLLAFRSQTLDPAQAQLGALAVSFASQVNAQNALGVDMSGNPGGSLFAVGAPAVYANQNNTGSATLSVSFVDGTQPTTSDYALSYDGAKYTLTDRATGSVVGTATPSSTPPTMTI…	667	BPSL0280
BKP2_00202	YSVERPVYAEASGQYTSSG	BPSL0280	35	MSNTLMNLGVSGLNAALWGLTTTGQNISNAATPGYSVERPVYAEASGQYTSSGYLPQGVSTVTVERQYNQYLSNQLNAAQTQGSSLSTYYTLVAQLNNYVGSPTAGIATAITNYFTGLQTVANNAADPSARQTAMSNAQTLASQLVAAGQQYSQLRQSVNSQLTDTVTQINSYTSQIAQLNEQIASASSQGQPPNQLLDQRDLAVSKLSQLAGVQVVQSNGNYSVFLSGGQPLVVGNASYQLATVASPSDPSELTIVSKGVAGSAQPGPTQYLPDVSLTGGALGGLLAFRSQTLDPAQAQLGALAVSFASQVNAQNALGVDMSGNPGGSLFAVGAPAVYANQNNTGSATLSVSFVDGTQPTTSDYALSYDGAKYTLTDRATGSVVGTATPSSTPPTMTI…	667	BPSL0280
BKP2_00203	VERPVYAEASGQYTSSGYL	BPSL0280	37	MSNTLMNLGVSGLNAALWGLTTTGQNISNAATPGYSVERPVYAEASGQYTSSGYLPQGVSTVTVERQYNQYLSNQLNAAQTQGSSLSTYYTLVAQLNNYVGSPTAGIATAITNYFTGLQTVANNAADPSARQTAMSNAQTLASQLVAAGQQYSQLRQSVNSQLTDTVTQINSYTSQIAQLNEQIASASSQGQPPNQLLDQRDLAVSKLSQLAGVQVVQSNGNYSVFLSGGQPLVVGNASYQLATVASPSDPSELTIVSKGVAGSAQPGPTQYLPDVSLTGGALGGLLAFRSQTLDPAQAQLGALAVSFASQVNAQNALGVDMSGNPGGSLFAVGAPAVYANQNNTGSATLSVSFVDGTQPTTSDYALSYDGAKYTLTDRATGSVVGTATPSSTPPTMTI…	667	BPSL0280
BKP2_00204	RPVYAEASGQYTSSGYLPQ	BPSL0280	39	MSNTLMNLGVSGLNAALWGLTTTGQNISNAATPGYSVERPVYAEASGQYTSSGYLPQGVSTVTVERQYNQYLSNQLNAAQTQGSSLSTYYTLVAQLNNYVGSPTAGIATAITNYFTGLQTVANNAADPSARQTAMSNAQTLASQLVAAGQQYSQLRQSVNSQLTDTVTQINSYTSQIAQLNEQIASASSQGQPPNQLLDQRDLAVSKLSQLAGVQVVQSNGNYSVFLSGGQPLVVGNASYQLATVASPSDPSELTIVSKGVAGSAQPGPTQYLPDVSLTGGALGGLLAFRSQTLDPAQAQLGALAVSFASQVNAQNALGVDMSGNPGGSLFAVGAPAVYANQNNTGSATLSVSFVDGTQPTTSDYALSYDGAKYTLTDRATGSVVGTATPSSTPPTMTI…	667	BPSL0280
BKP2_00205	VYAEASGQYTSSGYLPQGV	BPSL0280	41	MSNTLMNLGVSGLNAALWGLTTTGQNISNAATPGYSVERPVYAEASGQYTSSGYLPQGVSTVTVERQYNQYLSNQLNAAQTQGSSLSTYYTLVAQLNNYVGSPTAGIATAITNYFTGLQTVANNAADPSARQTAMSNAQTLASQLVAAGQQYSQLRQSVNSQLTDTVTQINSYTSQIAQLNEQIASASSQGQPPNQLLDQRDLAVSKLSQLAGVQVVQSNGNYSVFLSGGQPLVVGNASYQLATVASPSDPSELTIVSKGVAGSAQPGPTQYLPDVSLTGGALGGLLAFRSQTLDPAQAQLGALAVSFASQVNAQNALGVDMSGNPGGSLFAVGAPAVYANQNNTGSATLSVSFVDGTQPTTSDYALSYDGAKYTLTDRATGSVVGTATPSSTPPTMTI…	667	BPSL0280
BKP2_00206	AEASGQYTSSGYLPQGVST	BPSL0280	43	MSNTLMNLGVSGLNAALWGLTTTGQNISNAATPGYSVERPVYAEASGQYTSSGYLPQGVSTVTVERQYNQYLSNQLNAAQTQGSSLSTYYTLVAQLNNYVGSPTAGIATAITNYFTGLQTVANNAADPSARQTAMSNAQTLASQLVAAGQQYSQLRQSVNSQLTDTVTQINSYTSQIAQLNEQIASASSQGQPPNQLLDQRDLAVSKLSQLAGVQVVQSNGNYSVFLSGGQPLVVGNASYQLATVASPSDPSELTIVSKGVAGSAQPGPTQYLPDVSLTGGALGGLLAFRSQTLDPAQAQLGALAVSFASQVNAQNALGVDMSGNPGGSLFAVGAPAVYANQNNTGSATLSVSFVDGTQPTTSDYALSYDGAKYTLTDRATGSVVGTATPSSTPPTMTI…	667	BPSL0280
BKP2_00207	ASGQYTSSGYLPQGVSTVT	BPSL0280	45	MSNTLMNLGVSGLNAALWGLTTTGQNISNAATPGYSVERPVYAEASGQYTSSGYLPQGVSTVTVERQYNQYLSNQLNAAQTQGSSLSTYYTLVAQLNNYVGSPTAGIATAITNYFTGLQTVANNAADPSARQTAMSNAQTLASQLVAAGQQYSQLRQSVNSQLTDTVTQINSYTSQIAQLNEQIASASSQGQPPNQLLDQRDLAVSKLSQLAGVQVVQSNGNYSVFLSGGQPLVVGNASYQLATVASPSDPSELTIVSKGVAGSAQPGPTQYLPDVSLTGGALGGLLAFRSQTLDPAQAQLGALAVSFASQVNAQNALGVDMSGNPGGSLFAVGAPAVYANQNNTGSATLSVSFVDGTQPTTSDYALSYDGAKYTLTDRATGSVVGTATPSSTPPTMTI…	667	BPSL0280
BKP2_00208	GQYTSSGYLPQGVSTVTVE	BPSL0280	47	MSNTLMNLGVSGLNAALWGLTTTGQNISNAATPGYSVERPVYAEASGQYTSSGYLPQGVSTVTVERQYNQYLSNQLNAAQTQGSSLSTYYTLVAQLNNYVGSPTAGIATAITNYFTGLQTVANNAADPSARQTAMSNAQTLASQLVAAGQQYSQLRQSVNSQLTDTVTQINSYTSQIAQLNEQIASASSQGQPPNQLLDQRDLAVSKLSQLAGVQVVQSNGNYSVFLSGGQPLVVGNASYQLATVASPSDPSELTIVSKGVAGSAQPGPTQYLPDVSLTGGALGGLLAFRSQTLDPAQAQLGALAVSFASQVNAQNALGVDMSGNPGGSLFAVGAPAVYANQNNTGSATLSVSFVDGTQPTTSDYALSYDGAKYTLTDRATGSVVGTATPSSTPPTMTI…	667	BPSL0280
BKP2_00209	YTSSGYLPQGVSTVTVERQ	BPSL0280	49	MSNTLMNLGVSGLNAALWGLTTTGQNISNAATPGYSVERPVYAEASGQYTSSGYLPQGVSTVTVERQYNQYLSNQLNAAQTQGSSLSTYYTLVAQLNNYVGSPTAGIATAITNYFTGLQTVANNAADPSARQTAMSNAQTLASQLVAAGQQYSQLRQSVNSQLTDTVTQINSYTSQIAQLNEQIASASSQGQPPNQLLDQRDLAVSKLSQLAGVQVVQSNGNYSVFLSGGQPLVVGNASYQLATVASPSDPSELTIVSKGVAGSAQPGPTQYLPDVSLTGGALGGLLAFRSQTLDPAQAQLGALAVSFASQVNAQNALGVDMSGNPGGSLFAVGAPAVYANQNNTGSATLSVSFVDGTQPTTSDYALSYDGAKYTLTDRATGSVVGTATPSSTPPTMTI…	667	BPSL0280
BKP2_00210	SSGYLPQGVSTVTVERQYN	BPSL0280	51	MSNTLMNLGVSGLNAALWGLTTTGQNISNAATPGYSVERPVYAEASGQYTSSGYLPQGVSTVTVERQYNQYLSNQLNAAQTQGSSLSTYYTLVAQLNNYVGSPTAGIATAITNYFTGLQTVANNAADPSARQTAMSNAQTLASQLVAAGQQYSQLRQSVNSQLTDTVTQINSYTSQIAQLNEQIASASSQGQPPNQLLDQRDLAVSKLSQLAGVQVVQSNGNYSVFLSGGQPLVVGNASYQLATVASPSDPSELTIVSKGVAGSAQPGPTQYLPDVSLTGGALGGLLAFRSQTLDPAQAQLGALAVSFASQVNAQNALGVDMSGNPGGSLFAVGAPAVYANQNNTGSATLSVSFVDGTQPTTSDYALSYDGAKYTLTDRATGSVVGTATPSSTPPTMTI…	667	BPSL0280
BKP2_00211	GYLPQGVSTVTVERQYNQY	BPSL0280	53	MSNTLMNLGVSGLNAALWGLTTTGQNISNAATPGYSVERPVYAEASGQYTSSGYLPQGVSTVTVERQYNQYLSNQLNAAQTQGSSLSTYYTLVAQLNNYVGSPTAGIATAITNYFTGLQTVANNAADPSARQTAMSNAQTLASQLVAAGQQYSQLRQSVNSQLTDTVTQINSYTSQIAQLNEQIASASSQGQPPNQLLDQRDLAVSKLSQLAGVQVVQSNGNYSVFLSGGQPLVVGNASYQLATVASPSDPSELTIVSKGVAGSAQPGPTQYLPDVSLTGGALGGLLAFRSQTLDPAQAQLGALAVSFASQVNAQNALGVDMSGNPGGSLFAVGAPAVYANQNNTGSATLSVSFVDGTQPTTSDYALSYDGAKYTLTDRATGSVVGTATPSSTPPTMTI…	667	BPSL0280
BKP2_00212	LPQGVSTVTVERQYNQYLS	BPSL0280	55	MSNTLMNLGVSGLNAALWGLTTTGQNISNAATPGYSVERPVYAEASGQYTSSGYLPQGVSTVTVERQYNQYLSNQLNAAQTQGSSLSTYYTLVAQLNNYVGSPTAGIATAITNYFTGLQTVANNAADPSARQTAMSNAQTLASQLVAAGQQYSQLRQSVNSQLTDTVTQINSYTSQIAQLNEQIASASSQGQPPNQLLDQRDLAVSKLSQLAGVQVVQSNGNYSVFLSGGQPLVVGNASYQLATVASPSDPSELTIVSKGVAGSAQPGPTQYLPDVSLTGGALGGLLAFRSQTLDPAQAQLGALAVSFASQVNAQNALGVDMSGNPGGSLFAVGAPAVYANQNNTGSATLSVSFVDGTQPTTSDYALSYDGAKYTLTDRATGSVVGTATPSSTPPTMTI…	667	BPSL0280
BKP2_00213	QGVSTVTVERQYNQYLSNQ	BPSL0280	57	MSNTLMNLGVSGLNAALWGLTTTGQNISNAATPGYSVERPVYAEASGQYTSSGYLPQGVSTVTVERQYNQYLSNQLNAAQTQGSSLSTYYTLVAQLNNYVGSPTAGIATAITNYFTGLQTVANNAADPSARQTAMSNAQTLASQLVAAGQQYSQLRQSVNSQLTDTVTQINSYTSQIAQLNEQIASASSQGQPPNQLLDQRDLAVSKLSQLAGVQVVQSNGNYSVFLSGGQPLVVGNASYQLATVASPSDPSELTIVSKGVAGSAQPGPTQYLPDVSLTGGALGGLLAFRSQTLDPAQAQLGALAVSFASQVNAQNALGVDMSGNPGGSLFAVGAPAVYANQNNTGSATLSVSFVDGTQPTTSDYALSYDGAKYTLTDRATGSVVGTATPSSTPPTMTI…	667	BPSL0280
BKP2_00214	VSTVTVERQYNQYLSNQLN	BPSL0280	59	MSNTLMNLGVSGLNAALWGLTTTGQNISNAATPGYSVERPVYAEASGQYTSSGYLPQGVSTVTVERQYNQYLSNQLNAAQTQGSSLSTYYTLVAQLNNYVGSPTAGIATAITNYFTGLQTVANNAADPSARQTAMSNAQTLASQLVAAGQQYSQLRQSVNSQLTDTVTQINSYTSQIAQLNEQIASASSQGQPPNQLLDQRDLAVSKLSQLAGVQVVQSNGNYSVFLSGGQPLVVGNASYQLATVASPSDPSELTIVSKGVAGSAQPGPTQYLPDVSLTGGALGGLLAFRSQTLDPAQAQLGALAVSFASQVNAQNALGVDMSGNPGGSLFAVGAPAVYANQNNTGSATLSVSFVDGTQPTTSDYALSYDGAKYTLTDRATGSVVGTATPSSTPPTMTI…	667	BPSL0280
BKP2_00215	TVTVERQYNQYLSNQLNAA	BPSL0280	61	MSNTLMNLGVSGLNAALWGLTTTGQNISNAATPGYSVERPVYAEASGQYTSSGYLPQGVSTVTVERQYNQYLSNQLNAAQTQGSSLSTYYTLVAQLNNYVGSPTAGIATAITNYFTGLQTVANNAADPSARQTAMSNAQTLASQLVAAGQQYSQLRQSVNSQLTDTVTQINSYTSQIAQLNEQIASASSQGQPPNQLLDQRDLAVSKLSQLAGVQVVQSNGNYSVFLSGGQPLVVGNASYQLATVASPSDPSELTIVSKGVAGSAQPGPTQYLPDVSLTGGALGGLLAFRSQTLDPAQAQLGALAVSFASQVNAQNALGVDMSGNPGGSLFAVGAPAVYANQNNTGSATLSVSFVDGTQPTTSDYALSYDGAKYTLTDRATGSVVGTATPSSTPPTMTI…	667	BPSL0280
BKP2_00216	TVERQYNQYLSNQLNAAQT	BPSL0280	63	MSNTLMNLGVSGLNAALWGLTTTGQNISNAATPGYSVERPVYAEASGQYTSSGYLPQGVSTVTVERQYNQYLSNQLNAAQTQGSSLSTYYTLVAQLNNYVGSPTAGIATAITNYFTGLQTVANNAADPSARQTAMSNAQTLASQLVAAGQQYSQLRQSVNSQLTDTVTQINSYTSQIAQLNEQIASASSQGQPPNQLLDQRDLAVSKLSQLAGVQVVQSNGNYSVFLSGGQPLVVGNASYQLATVASPSDPSELTIVSKGVAGSAQPGPTQYLPDVSLTGGALGGLLAFRSQTLDPAQAQLGALAVSFASQVNAQNALGVDMSGNPGGSLFAVGAPAVYANQNNTGSATLSVSFVDGTQPTTSDYALSYDGAKYTLTDRATGSVVGTATPSSTPPTMTI…	667	BPSL0280
BKP2_00217	ERQYNQYLSNQLNAAQTQG	BPSL0280	65	MSNTLMNLGVSGLNAALWGLTTTGQNISNAATPGYSVERPVYAEASGQYTSSGYLPQGVSTVTVERQYNQYLSNQLNAAQTQGSSLSTYYTLVAQLNNYVGSPTAGIATAITNYFTGLQTVANNAADPSARQTAMSNAQTLASQLVAAGQQYSQLRQSVNSQLTDTVTQINSYTSQIAQLNEQIASASSQGQPPNQLLDQRDLAVSKLSQLAGVQVVQSNGNYSVFLSGGQPLVVGNASYQLATVASPSDPSELTIVSKGVAGSAQPGPTQYLPDVSLTGGALGGLLAFRSQTLDPAQAQLGALAVSFASQVNAQNALGVDMSGNPGGSLFAVGAPAVYANQNNTGSATLSVSFVDGTQPTTSDYALSYDGAKYTLTDRATGSVVGTATPSSTPPTMTI…	667	BPSL0280
BKP2_00218	QYNQYLSNQLNAAQTQGSS	BPSL0280	67	MSNTLMNLGVSGLNAALWGLTTTGQNISNAATPGYSVERPVYAEASGQYTSSGYLPQGVSTVTVERQYNQYLSNQLNAAQTQGSSLSTYYTLVAQLNNYVGSPTAGIATAITNYFTGLQTVANNAADPSARQTAMSNAQTLASQLVAAGQQYSQLRQSVNSQLTDTVTQINSYTSQIAQLNEQIASASSQGQPPNQLLDQRDLAVSKLSQLAGVQVVQSNGNYSVFLSGGQPLVVGNASYQLATVASPSDPSELTIVSKGVAGSAQPGPTQYLPDVSLTGGALGGLLAFRSQTLDPAQAQLGALAVSFASQVNAQNALGVDMSGNPGGSLFAVGAPAVYANQNNTGSATLSVSFVDGTQPTTSDYALSYDGAKYTLTDRATGSVVGTATPSSTPPTMTI…	667	BPSL0280
BKP2_00219	NQYLSNQLNAAQTQGSSLS	BPSL0280	69	MSNTLMNLGVSGLNAALWGLTTTGQNISNAATPGYSVERPVYAEASGQYTSSGYLPQGVSTVTVERQYNQYLSNQLNAAQTQGSSLSTYYTLVAQLNNYVGSPTAGIATAITNYFTGLQTVANNAADPSARQTAMSNAQTLASQLVAAGQQYSQLRQSVNSQLTDTVTQINSYTSQIAQLNEQIASASSQGQPPNQLLDQRDLAVSKLSQLAGVQVVQSNGNYSVFLSGGQPLVVGNASYQLATVASPSDPSELTIVSKGVAGSAQPGPTQYLPDVSLTGGALGGLLAFRSQTLDPAQAQLGALAVSFASQVNAQNALGVDMSGNPGGSLFAVGAPAVYANQNNTGSATLSVSFVDGTQPTTSDYALSYDGAKYTLTDRATGSVVGTATPSSTPPTMTI…	667	BPSL0280
BKP2_00220	YLSNQLNAAQTQGSSLSTY	BPSL0280	71	MSNTLMNLGVSGLNAALWGLTTTGQNISNAATPGYSVERPVYAEASGQYTSSGYLPQGVSTVTVERQYNQYLSNQLNAAQTQGSSLSTYYTLVAQLNNYVGSPTAGIATAITNYFTGLQTVANNAADPSARQTAMSNAQTLASQLVAAGQQYSQLRQSVNSQLTDTVTQINSYTSQIAQLNEQIASASSQGQPPNQLLDQRDLAVSKLSQLAGVQVVQSNGNYSVFLSGGQPLVVGNASYQLATVASPSDPSELTIVSKGVAGSAQPGPTQYLPDVSLTGGALGGLLAFRSQTLDPAQAQLGALAVSFASQVNAQNALGVDMSGNPGGSLFAVGAPAVYANQNNTGSATLSVSFVDGTQPTTSDYALSYDGAKYTLTDRATGSVVGTATPSSTPPTMTI…	667	BPSL0280
BKP2_00221	SNQLNAAQTQGSSLSTYYT	BPSL0280	73	MSNTLMNLGVSGLNAALWGLTTTGQNISNAATPGYSVERPVYAEASGQYTSSGYLPQGVSTVTVERQYNQYLSNQLNAAQTQGSSLSTYYTLVAQLNNYVGSPTAGIATAITNYFTGLQTVANNAADPSARQTAMSNAQTLASQLVAAGQQYSQLRQSVNSQLTDTVTQINSYTSQIAQLNEQIASASSQGQPPNQLLDQRDLAVSKLSQLAGVQVVQSNGNYSVFLSGGQPLVVGNASYQLATVASPSDPSELTIVSKGVAGSAQPGPTQYLPDVSLTGGALGGLLAFRSQTLDPAQAQLGALAVSFASQVNAQNALGVDMSGNPGGSLFAVGAPAVYANQNNTGSATLSVSFVDGTQPTTSDYALSYDGAKYTLTDRATGSVVGTATPSSTPPTMTI…	667	BPSL0280
BKP2_00222	QLNAAQTQGSSLSTYYTLV	BPSL0280	75	MSNTLMNLGVSGLNAALWGLTTTGQNISNAATPGYSVERPVYAEASGQYTSSGYLPQGVSTVTVERQYNQYLSNQLNAAQTQGSSLSTYYTLVAQLNNYVGSPTAGIATAITNYFTGLQTVANNAADPSARQTAMSNAQTLASQLVAAGQQYSQLRQSVNSQLTDTVTQINSYTSQIAQLNEQIASASSQGQPPNQLLDQRDLAVSKLSQLAGVQVVQSNGNYSVFLSGGQPLVVGNASYQLATVASPSDPSELTIVSKGVAGSAQPGPTQYLPDVSLTGGALGGLLAFRSQTLDPAQAQLGALAVSFASQVNAQNALGVDMSGNPGGSLFAVGAPAVYANQNNTGSATLSVSFVDGTQPTTSDYALSYDGAKYTLTDRATGSVVGTATPSSTPPTMTI…	667	BPSL0280
BKP2_00223	NAAQTQGSSLSTYYTLVAQ	BPSL0280	77	MSNTLMNLGVSGLNAALWGLTTTGQNISNAATPGYSVERPVYAEASGQYTSSGYLPQGVSTVTVERQYNQYLSNQLNAAQTQGSSLSTYYTLVAQLNNYVGSPTAGIATAITNYFTGLQTVANNAADPSARQTAMSNAQTLASQLVAAGQQYSQLRQSVNSQLTDTVTQINSYTSQIAQLNEQIASASSQGQPPNQLLDQRDLAVSKLSQLAGVQVVQSNGNYSVFLSGGQPLVVGNASYQLATVASPSDPSELTIVSKGVAGSAQPGPTQYLPDVSLTGGALGGLLAFRSQTLDPAQAQLGALAVSFASQVNAQNALGVDMSGNPGGSLFAVGAPAVYANQNNTGSATLSVSFVDGTQPTTSDYALSYDGAKYTLTDRATGSVVGTATPSSTPPTMTI…	667	BPSL0280
BKP2_00224	AQTQGSSLSTYYTLVAQLN	BPSL0280	79	MSNTLMNLGVSGLNAALWGLTTTGQNISNAATPGYSVERPVYAEASGQYTSSGYLPQGVSTVTVERQYNQYLSNQLNAAQTQGSSLSTYYTLVAQLNNYVGSPTAGIATAITNYFTGLQTVANNAADPSARQTAMSNAQTLASQLVAAGQQYSQLRQSVNSQLTDTVTQINSYTSQIAQLNEQIASASSQGQPPNQLLDQRDLAVSKLSQLAGVQVVQSNGNYSVFLSGGQPLVVGNASYQLATVASPSDPSELTIVSKGVAGSAQPGPTQYLPDVSLTGGALGGLLAFRSQTLDPAQAQLGALAVSFASQVNAQNALGVDMSGNPGGSLFAVGAPAVYANQNNTGSATLSVSFVDGTQPTTSDYALSYDGAKYTLTDRATGSVVGTATPSSTPPTMTI…	667	BPSL0280
BKP2_00225	TQGSSLSTYYTLVAQLNNY	BPSL0280	81	MSNTLMNLGVSGLNAALWGLTTTGQNISNAATPGYSVERPVYAEASGQYTSSGYLPQGVSTVTVERQYNQYLSNQLNAAQTQGSSLSTYYTLVAQLNNYVGSPTAGIATAITNYFTGLQTVANNAADPSARQTAMSNAQTLASQLVAAGQQYSQLRQSVNSQLTDTVTQINSYTSQIAQLNEQIASASSQGQPPNQLLDQRDLAVSKLSQLAGVQVVQSNGNYSVFLSGGQPLVVGNASYQLATVASPSDPSELTIVSKGVAGSAQPGPTQYLPDVSLTGGALGGLLAFRSQTLDPAQAQLGALAVSFASQVNAQNALGVDMSGNPGGSLFAVGAPAVYANQNNTGSATLSVSFVDGTQPTTSDYALSYDGAKYTLTDRATGSVVGTATPSSTPPTMTI…	667	BPSL0280
BKP2_00226	GSSLSTYYTLVAQLNNYVG	BPSL0280	83	MSNTLMNLGVSGLNAALWGLTTTGQNISNAATPGYSVERPVYAEASGQYTSSGYLPQGVSTVTVERQYNQYLSNQLNAAQTQGSSLSTYYTLVAQLNNYVGSPTAGIATAITNYFTGLQTVANNAADPSARQTAMSNAQTLASQLVAAGQQYSQLRQSVNSQLTDTVTQINSYTSQIAQLNEQIASASSQGQPPNQLLDQRDLAVSKLSQLAGVQVVQSNGNYSVFLSGGQPLVVGNASYQLATVASPSDPSELTIVSKGVAGSAQPGPTQYLPDVSLTGGALGGLLAFRSQTLDPAQAQLGALAVSFASQVNAQNALGVDMSGNPGGSLFAVGAPAVYANQNNTGSATLSVSFVDGTQPTTSDYALSYDGAKYTLTDRATGSVVGTATPSSTPPTMTI…	667	BPSL0280
BKP2_00227	SLSTYYTLVAQLNNYVGSP	BPSL0280	85	MSNTLMNLGVSGLNAALWGLTTTGQNISNAATPGYSVERPVYAEASGQYTSSGYLPQGVSTVTVERQYNQYLSNQLNAAQTQGSSLSTYYTLVAQLNNYVGSPTAGIATAITNYFTGLQTVANNAADPSARQTAMSNAQTLASQLVAAGQQYSQLRQSVNSQLTDTVTQINSYTSQIAQLNEQIASASSQGQPPNQLLDQRDLAVSKLSQLAGVQVVQSNGNYSVFLSGGQPLVVGNASYQLATVASPSDPSELTIVSKGVAGSAQPGPTQYLPDVSLTGGALGGLLAFRSQTLDPAQAQLGALAVSFASQVNAQNALGVDMSGNPGGSLFAVGAPAVYANQNNTGSATLSVSFVDGTQPTTSDYALSYDGAKYTLTDRATGSVVGTATPSSTPPTMTI…	667	BPSL0280
BKP2_00228	STYYTLVAQLNNYVGSPTA	BPSL0280	87	MSNTLMNLGVSGLNAALWGLTTTGQNISNAATPGYSVERPVYAEASGQYTSSGYLPQGVSTVTVERQYNQYLSNQLNAAQTQGSSLSTYYTLVAQLNNYVGSPTAGIATAITNYFTGLQTVANNAADPSARQTAMSNAQTLASQLVAAGQQYSQLRQSVNSQLTDTVTQINSYTSQIAQLNEQIASASSQGQPPNQLLDQRDLAVSKLSQLAGVQVVQSNGNYSVFLSGGQPLVVGNASYQLATVASPSDPSELTIVSKGVAGSAQPGPTQYLPDVSLTGGALGGLLAFRSQTLDPAQAQLGALAVSFASQVNAQNALGVDMSGNPGGSLFAVGAPAVYANQNNTGSATLSVSFVDGTQPTTSDYALSYDGAKYTLTDRATGSVVGTATPSSTPPTMTI…	667	BPSL0280
BKP2_00229	YYTLVAQLNNYVGSPTAGI	BPSL0280	89	MSNTLMNLGVSGLNAALWGLTTTGQNISNAATPGYSVERPVYAEASGQYTSSGYLPQGVSTVTVERQYNQYLSNQLNAAQTQGSSLSTYYTLVAQLNNYVGSPTAGIATAITNYFTGLQTVANNAADPSARQTAMSNAQTLASQLVAAGQQYSQLRQSVNSQLTDTVTQINSYTSQIAQLNEQIASASSQGQPPNQLLDQRDLAVSKLSQLAGVQVVQSNGNYSVFLSGGQPLVVGNASYQLATVASPSDPSELTIVSKGVAGSAQPGPTQYLPDVSLTGGALGGLLAFRSQTLDPAQAQLGALAVSFASQVNAQNALGVDMSGNPGGSLFAVGAPAVYANQNNTGSATLSVSFVDGTQPTTSDYALSYDGAKYTLTDRATGSVVGTATPSSTPPTMTI…	667	BPSL0280
BKP2_00230	TLVAQLNNYVGSPTAGIAT	BPSL0280	91	MSNTLMNLGVSGLNAALWGLTTTGQNISNAATPGYSVERPVYAEASGQYTSSGYLPQGVSTVTVERQYNQYLSNQLNAAQTQGSSLSTYYTLVAQLNNYVGSPTAGIATAITNYFTGLQTVANNAADPSARQTAMSNAQTLASQLVAAGQQYSQLRQSVNSQLTDTVTQINSYTSQIAQLNEQIASASSQGQPPNQLLDQRDLAVSKLSQLAGVQVVQSNGNYSVFLSGGQPLVVGNASYQLATVASPSDPSELTIVSKGVAGSAQPGPTQYLPDVSLTGGALGGLLAFRSQTLDPAQAQLGALAVSFASQVNAQNALGVDMSGNPGGSLFAVGAPAVYANQNNTGSATLSVSFVDGTQPTTSDYALSYDGAKYTLTDRATGSVVGTATPSSTPPTMTI…	667	BPSL0280
BKP2_00231	VAQLNNYVGSPTAGIATAI	BPSL0280	93	MSNTLMNLGVSGLNAALWGLTTTGQNISNAATPGYSVERPVYAEASGQYTSSGYLPQGVSTVTVERQYNQYLSNQLNAAQTQGSSLSTYYTLVAQLNNYVGSPTAGIATAITNYFTGLQTVANNAADPSARQTAMSNAQTLASQLVAAGQQYSQLRQSVNSQLTDTVTQINSYTSQIAQLNEQIASASSQGQPPNQLLDQRDLAVSKLSQLAGVQVVQSNGNYSVFLSGGQPLVVGNASYQLATVASPSDPSELTIVSKGVAGSAQPGPTQYLPDVSLTGGALGGLLAFRSQTLDPAQAQLGALAVSFASQVNAQNALGVDMSGNPGGSLFAVGAPAVYANQNNTGSATLSVSFVDGTQPTTSDYALSYDGAKYTLTDRATGSVVGTATPSSTPPTMTI…	667	BPSL0280
BKP2_00232	QLNNYVGSPTAGIATAITN	BPSL0280	95	MSNTLMNLGVSGLNAALWGLTTTGQNISNAATPGYSVERPVYAEASGQYTSSGYLPQGVSTVTVERQYNQYLSNQLNAAQTQGSSLSTYYTLVAQLNNYVGSPTAGIATAITNYFTGLQTVANNAADPSARQTAMSNAQTLASQLVAAGQQYSQLRQSVNSQLTDTVTQINSYTSQIAQLNEQIASASSQGQPPNQLLDQRDLAVSKLSQLAGVQVVQSNGNYSVFLSGGQPLVVGNASYQLATVASPSDPSELTIVSKGVAGSAQPGPTQYLPDVSLTGGALGGLLAFRSQTLDPAQAQLGALAVSFASQVNAQNALGVDMSGNPGGSLFAVGAPAVYANQNNTGSATLSVSFVDGTQPTTSDYALSYDGAKYTLTDRATGSVVGTATPSSTPPTMTI…	667	BPSL0280
BKP2_00233	NNYVGSPTAGIATAITNYF	BPSL0280	97	MSNTLMNLGVSGLNAALWGLTTTGQNISNAATPGYSVERPVYAEASGQYTSSGYLPQGVSTVTVERQYNQYLSNQLNAAQTQGSSLSTYYTLVAQLNNYVGSPTAGIATAITNYFTGLQTVANNAADPSARQTAMSNAQTLASQLVAAGQQYSQLRQSVNSQLTDTVTQINSYTSQIAQLNEQIASASSQGQPPNQLLDQRDLAVSKLSQLAGVQVVQSNGNYSVFLSGGQPLVVGNASYQLATVASPSDPSELTIVSKGVAGSAQPGPTQYLPDVSLTGGALGGLLAFRSQTLDPAQAQLGALAVSFASQVNAQNALGVDMSGNPGGSLFAVGAPAVYANQNNTGSATLSVSFVDGTQPTTSDYALSYDGAKYTLTDRATGSVVGTATPSSTPPTMTI…	667	BPSL0280
BKP2_00234	YVGSPTAGIATAITNYFTG	BPSL0280	99	MSNTLMNLGVSGLNAALWGLTTTGQNISNAATPGYSVERPVYAEASGQYTSSGYLPQGVSTVTVERQYNQYLSNQLNAAQTQGSSLSTYYTLVAQLNNYVGSPTAGIATAITNYFTGLQTVANNAADPSARQTAMSNAQTLASQLVAAGQQYSQLRQSVNSQLTDTVTQINSYTSQIAQLNEQIASASSQGQPPNQLLDQRDLAVSKLSQLAGVQVVQSNGNYSVFLSGGQPLVVGNASYQLATVASPSDPSELTIVSKGVAGSAQPGPTQYLPDVSLTGGALGGLLAFRSQTLDPAQAQLGALAVSFASQVNAQNALGVDMSGNPGGSLFAVGAPAVYANQNNTGSATLSVSFVDGTQPTTSDYALSYDGAKYTLTDRATGSVVGTATPSSTPPTMTI…	667	BPSL0280
BKP2_00235	GSPTAGIATAITNYFTGLQ	BPSL0280	101	MSNTLMNLGVSGLNAALWGLTTTGQNISNAATPGYSVERPVYAEASGQYTSSGYLPQGVSTVTVERQYNQYLSNQLNAAQTQGSSLSTYYTLVAQLNNYVGSPTAGIATAITNYFTGLQTVANNAADPSARQTAMSNAQTLASQLVAAGQQYSQLRQSVNSQLTDTVTQINSYTSQIAQLNEQIASASSQGQPPNQLLDQRDLAVSKLSQLAGVQVVQSNGNYSVFLSGGQPLVVGNASYQLATVASPSDPSELTIVSKGVAGSAQPGPTQYLPDVSLTGGALGGLLAFRSQTLDPAQAQLGALAVSFASQVNAQNALGVDMSGNPGGSLFAVGAPAVYANQNNTGSATLSVSFVDGTQPTTSDYALSYDGAKYTLTDRATGSVVGTATPSSTPPTMTI…	667	BPSL0280
BKP2_00236	PTAGIATAITNYFTGLQTV	BPSL0280	103	MSNTLMNLGVSGLNAALWGLTTTGQNISNAATPGYSVERPVYAEASGQYTSSGYLPQGVSTVTVERQYNQYLSNQLNAAQTQGSSLSTYYTLVAQLNNYVGSPTAGIATAITNYFTGLQTVANNAADPSARQTAMSNAQTLASQLVAAGQQYSQLRQSVNSQLTDTVTQINSYTSQIAQLNEQIASASSQGQPPNQLLDQRDLAVSKLSQLAGVQVVQSNGNYSVFLSGGQPLVVGNASYQLATVASPSDPSELTIVSKGVAGSAQPGPTQYLPDVSLTGGALGGLLAFRSQTLDPAQAQLGALAVSFASQVNAQNALGVDMSGNPGGSLFAVGAPAVYANQNNTGSATLSVSFVDGTQPTTSDYALSYDGAKYTLTDRATGSVVGTATPSSTPPTMTI…	667	BPSL0280
BKP2_00237	AGIATAITNYFTGLQTVAN	BPSL0280	105	MSNTLMNLGVSGLNAALWGLTTTGQNISNAATPGYSVERPVYAEASGQYTSSGYLPQGVSTVTVERQYNQYLSNQLNAAQTQGSSLSTYYTLVAQLNNYVGSPTAGIATAITNYFTGLQTVANNAADPSARQTAMSNAQTLASQLVAAGQQYSQLRQSVNSQLTDTVTQINSYTSQIAQLNEQIASASSQGQPPNQLLDQRDLAVSKLSQLAGVQVVQSNGNYSVFLSGGQPLVVGNASYQLATVASPSDPSELTIVSKGVAGSAQPGPTQYLPDVSLTGGALGGLLAFRSQTLDPAQAQLGALAVSFASQVNAQNALGVDMSGNPGGSLFAVGAPAVYANQNNTGSATLSVSFVDGTQPTTSDYALSYDGAKYTLTDRATGSVVGTATPSSTPPTMTI…	667	BPSL0280
BKP2_00238	IATAITNYFTGLQTVANNA	BPSL0280	107	MSNTLMNLGVSGLNAALWGLTTTGQNISNAATPGYSVERPVYAEASGQYTSSGYLPQGVSTVTVERQYNQYLSNQLNAAQTQGSSLSTYYTLVAQLNNYVGSPTAGIATAITNYFTGLQTVANNAADPSARQTAMSNAQTLASQLVAAGQQYSQLRQSVNSQLTDTVTQINSYTSQIAQLNEQIASASSQGQPPNQLLDQRDLAVSKLSQLAGVQVVQSNGNYSVFLSGGQPLVVGNASYQLATVASPSDPSELTIVSKGVAGSAQPGPTQYLPDVSLTGGALGGLLAFRSQTLDPAQAQLGALAVSFASQVNAQNALGVDMSGNPGGSLFAVGAPAVYANQNNTGSATLSVSFVDGTQPTTSDYALSYDGAKYTLTDRATGSVVGTATPSSTPPTMTI…	667	BPSL0280
BKP2_00239	TAITNYFTGLQTVANNAAD	BPSL0280	109	MSNTLMNLGVSGLNAALWGLTTTGQNISNAATPGYSVERPVYAEASGQYTSSGYLPQGVSTVTVERQYNQYLSNQLNAAQTQGSSLSTYYTLVAQLNNYVGSPTAGIATAITNYFTGLQTVANNAADPSARQTAMSNAQTLASQLVAAGQQYSQLRQSVNSQLTDTVTQINSYTSQIAQLNEQIASASSQGQPPNQLLDQRDLAVSKLSQLAGVQVVQSNGNYSVFLSGGQPLVVGNASYQLATVASPSDPSELTIVSKGVAGSAQPGPTQYLPDVSLTGGALGGLLAFRSQTLDPAQAQLGALAVSFASQVNAQNALGVDMSGNPGGSLFAVGAPAVYANQNNTGSATLSVSFVDGTQPTTSDYALSYDGAKYTLTDRATGSVVGTATPSSTPPTMTI…	667	BPSL0280
BKP2_00240	ITNYFTGLQTVANNAADPS	BPSL0280	111	MSNTLMNLGVSGLNAALWGLTTTGQNISNAATPGYSVERPVYAEASGQYTSSGYLPQGVSTVTVERQYNQYLSNQLNAAQTQGSSLSTYYTLVAQLNNYVGSPTAGIATAITNYFTGLQTVANNAADPSARQTAMSNAQTLASQLVAAGQQYSQLRQSVNSQLTDTVTQINSYTSQIAQLNEQIASASSQGQPPNQLLDQRDLAVSKLSQLAGVQVVQSNGNYSVFLSGGQPLVVGNASYQLATVASPSDPSELTIVSKGVAGSAQPGPTQYLPDVSLTGGALGGLLAFRSQTLDPAQAQLGALAVSFASQVNAQNALGVDMSGNPGGSLFAVGAPAVYANQNNTGSATLSVSFVDGTQPTTSDYALSYDGAKYTLTDRATGSVVGTATPSSTPPTMTI…	667	BPSL0280
BKP2_00241	NYFTGLQTVANNAADPSAR	BPSL0280	113	MSNTLMNLGVSGLNAALWGLTTTGQNISNAATPGYSVERPVYAEASGQYTSSGYLPQGVSTVTVERQYNQYLSNQLNAAQTQGSSLSTYYTLVAQLNNYVGSPTAGIATAITNYFTGLQTVANNAADPSARQTAMSNAQTLASQLVAAGQQYSQLRQSVNSQLTDTVTQINSYTSQIAQLNEQIASASSQGQPPNQLLDQRDLAVSKLSQLAGVQVVQSNGNYSVFLSGGQPLVVGNASYQLATVASPSDPSELTIVSKGVAGSAQPGPTQYLPDVSLTGGALGGLLAFRSQTLDPAQAQLGALAVSFASQVNAQNALGVDMSGNPGGSLFAVGAPAVYANQNNTGSATLSVSFVDGTQPTTSDYALSYDGAKYTLTDRATGSVVGTATPSSTPPTMTI…	667	BPSL0280
BKP2_00242	FTGLQTVANNAADPSARQT	BPSL0280	115	MSNTLMNLGVSGLNAALWGLTTTGQNISNAATPGYSVERPVYAEASGQYTSSGYLPQGVSTVTVERQYNQYLSNQLNAAQTQGSSLSTYYTLVAQLNNYVGSPTAGIATAITNYFTGLQTVANNAADPSARQTAMSNAQTLASQLVAAGQQYSQLRQSVNSQLTDTVTQINSYTSQIAQLNEQIASASSQGQPPNQLLDQRDLAVSKLSQLAGVQVVQSNGNYSVFLSGGQPLVVGNASYQLATVASPSDPSELTIVSKGVAGSAQPGPTQYLPDVSLTGGALGGLLAFRSQTLDPAQAQLGALAVSFASQVNAQNALGVDMSGNPGGSLFAVGAPAVYANQNNTGSATLSVSFVDGTQPTTSDYALSYDGAKYTLTDRATGSVVGTATPSSTPPTMTI…	667	BPSL0280
BKP2_00243	GLQTVANNAADPSARQTAM	BPSL0280	117	MSNTLMNLGVSGLNAALWGLTTTGQNISNAATPGYSVERPVYAEASGQYTSSGYLPQGVSTVTVERQYNQYLSNQLNAAQTQGSSLSTYYTLVAQLNNYVGSPTAGIATAITNYFTGLQTVANNAADPSARQTAMSNAQTLASQLVAAGQQYSQLRQSVNSQLTDTVTQINSYTSQIAQLNEQIASASSQGQPPNQLLDQRDLAVSKLSQLAGVQVVQSNGNYSVFLSGGQPLVVGNASYQLATVASPSDPSELTIVSKGVAGSAQPGPTQYLPDVSLTGGALGGLLAFRSQTLDPAQAQLGALAVSFASQVNAQNALGVDMSGNPGGSLFAVGAPAVYANQNNTGSATLSVSFVDGTQPTTSDYALSYDGAKYTLTDRATGSVVGTATPSSTPPTMTI…	667	BPSL0280
BKP2_00244	QTVANNAADPSARQTAMSN	BPSL0280	119	MSNTLMNLGVSGLNAALWGLTTTGQNISNAATPGYSVERPVYAEASGQYTSSGYLPQGVSTVTVERQYNQYLSNQLNAAQTQGSSLSTYYTLVAQLNNYVGSPTAGIATAITNYFTGLQTVANNAADPSARQTAMSNAQTLASQLVAAGQQYSQLRQSVNSQLTDTVTQINSYTSQIAQLNEQIASASSQGQPPNQLLDQRDLAVSKLSQLAGVQVVQSNGNYSVFLSGGQPLVVGNASYQLATVASPSDPSELTIVSKGVAGSAQPGPTQYLPDVSLTGGALGGLLAFRSQTLDPAQAQLGALAVSFASQVNAQNALGVDMSGNPGGSLFAVGAPAVYANQNNTGSATLSVSFVDGTQPTTSDYALSYDGAKYTLTDRATGSVVGTATPSSTPPTMTI…	667	BPSL0280
BKP2_00245	VANNAADPSARQTAMSNAQ	BPSL0280	121	MSNTLMNLGVSGLNAALWGLTTTGQNISNAATPGYSVERPVYAEASGQYTSSGYLPQGVSTVTVERQYNQYLSNQLNAAQTQGSSLSTYYTLVAQLNNYVGSPTAGIATAITNYFTGLQTVANNAADPSARQTAMSNAQTLASQLVAAGQQYSQLRQSVNSQLTDTVTQINSYTSQIAQLNEQIASASSQGQPPNQLLDQRDLAVSKLSQLAGVQVVQSNGNYSVFLSGGQPLVVGNASYQLATVASPSDPSELTIVSKGVAGSAQPGPTQYLPDVSLTGGALGGLLAFRSQTLDPAQAQLGALAVSFASQVNAQNALGVDMSGNPGGSLFAVGAPAVYANQNNTGSATLSVSFVDGTQPTTSDYALSYDGAKYTLTDRATGSVVGTATPSSTPPTMTI…	667	BPSL0280
BKP2_00246	NNAADPSARQTAMSNAQTL	BPSL0280	123	MSNTLMNLGVSGLNAALWGLTTTGQNISNAATPGYSVERPVYAEASGQYTSSGYLPQGVSTVTVERQYNQYLSNQLNAAQTQGSSLSTYYTLVAQLNNYVGSPTAGIATAITNYFTGLQTVANNAADPSARQTAMSNAQTLASQLVAAGQQYSQLRQSVNSQLTDTVTQINSYTSQIAQLNEQIASASSQGQPPNQLLDQRDLAVSKLSQLAGVQVVQSNGNYSVFLSGGQPLVVGNASYQLATVASPSDPSELTIVSKGVAGSAQPGPTQYLPDVSLTGGALGGLLAFRSQTLDPAQAQLGALAVSFASQVNAQNALGVDMSGNPGGSLFAVGAPAVYANQNNTGSATLSVSFVDGTQPTTSDYALSYDGAKYTLTDRATGSVVGTATPSSTPPTMTI…	667	BPSL0280
BKP2_00247	AADPSARQTAMSNAQTLAS	BPSL0280	125	MSNTLMNLGVSGLNAALWGLTTTGQNISNAATPGYSVERPVYAEASGQYTSSGYLPQGVSTVTVERQYNQYLSNQLNAAQTQGSSLSTYYTLVAQLNNYVGSPTAGIATAITNYFTGLQTVANNAADPSARQTAMSNAQTLASQLVAAGQQYSQLRQSVNSQLTDTVTQINSYTSQIAQLNEQIASASSQGQPPNQLLDQRDLAVSKLSQLAGVQVVQSNGNYSVFLSGGQPLVVGNASYQLATVASPSDPSELTIVSKGVAGSAQPGPTQYLPDVSLTGGALGGLLAFRSQTLDPAQAQLGALAVSFASQVNAQNALGVDMSGNPGGSLFAVGAPAVYANQNNTGSATLSVSFVDGTQPTTSDYALSYDGAKYTLTDRATGSVVGTATPSSTPPTMTI…	667	BPSL0280
BKP2_00248	DPSARQTAMSNAQTLASQL	BPSL0280	127	MSNTLMNLGVSGLNAALWGLTTTGQNISNAATPGYSVERPVYAEASGQYTSSGYLPQGVSTVTVERQYNQYLSNQLNAAQTQGSSLSTYYTLVAQLNNYVGSPTAGIATAITNYFTGLQTVANNAADPSARQTAMSNAQTLASQLVAAGQQYSQLRQSVNSQLTDTVTQINSYTSQIAQLNEQIASASSQGQPPNQLLDQRDLAVSKLSQLAGVQVVQSNGNYSVFLSGGQPLVVGNASYQLATVASPSDPSELTIVSKGVAGSAQPGPTQYLPDVSLTGGALGGLLAFRSQTLDPAQAQLGALAVSFASQVNAQNALGVDMSGNPGGSLFAVGAPAVYANQNNTGSATLSVSFVDGTQPTTSDYALSYDGAKYTLTDRATGSVVGTATPSSTPPTMTI…	667	BPSL0280
BKP2_00249	SARQTAMSNAQTLASQLVA	BPSL0280	129	MSNTLMNLGVSGLNAALWGLTTTGQNISNAATPGYSVERPVYAEASGQYTSSGYLPQGVSTVTVERQYNQYLSNQLNAAQTQGSSLSTYYTLVAQLNNYVGSPTAGIATAITNYFTGLQTVANNAADPSARQTAMSNAQTLASQLVAAGQQYSQLRQSVNSQLTDTVTQINSYTSQIAQLNEQIASASSQGQPPNQLLDQRDLAVSKLSQLAGVQVVQSNGNYSVFLSGGQPLVVGNASYQLATVASPSDPSELTIVSKGVAGSAQPGPTQYLPDVSLTGGALGGLLAFRSQTLDPAQAQLGALAVSFASQVNAQNALGVDMSGNPGGSLFAVGAPAVYANQNNTGSATLSVSFVDGTQPTTSDYALSYDGAKYTLTDRATGSVVGTATPSSTPPTMTI…	667	BPSL0280
BKP2_00250	RQTAMSNAQTLASQLVAAG	BPSL0280	131	MSNTLMNLGVSGLNAALWGLTTTGQNISNAATPGYSVERPVYAEASGQYTSSGYLPQGVSTVTVERQYNQYLSNQLNAAQTQGSSLSTYYTLVAQLNNYVGSPTAGIATAITNYFTGLQTVANNAADPSARQTAMSNAQTLASQLVAAGQQYSQLRQSVNSQLTDTVTQINSYTSQIAQLNEQIASASSQGQPPNQLLDQRDLAVSKLSQLAGVQVVQSNGNYSVFLSGGQPLVVGNASYQLATVASPSDPSELTIVSKGVAGSAQPGPTQYLPDVSLTGGALGGLLAFRSQTLDPAQAQLGALAVSFASQVNAQNALGVDMSGNPGGSLFAVGAPAVYANQNNTGSATLSVSFVDGTQPTTSDYALSYDGAKYTLTDRATGSVVGTATPSSTPPTMTI…	667	BPSL0280
BKP2_00251	TAMSNAQTLASQLVAAGQQ	BPSL0280	133	MSNTLMNLGVSGLNAALWGLTTTGQNISNAATPGYSVERPVYAEASGQYTSSGYLPQGVSTVTVERQYNQYLSNQLNAAQTQGSSLSTYYTLVAQLNNYVGSPTAGIATAITNYFTGLQTVANNAADPSARQTAMSNAQTLASQLVAAGQQYSQLRQSVNSQLTDTVTQINSYTSQIAQLNEQIASASSQGQPPNQLLDQRDLAVSKLSQLAGVQVVQSNGNYSVFLSGGQPLVVGNASYQLATVASPSDPSELTIVSKGVAGSAQPGPTQYLPDVSLTGGALGGLLAFRSQTLDPAQAQLGALAVSFASQVNAQNALGVDMSGNPGGSLFAVGAPAVYANQNNTGSATLSVSFVDGTQPTTSDYALSYDGAKYTLTDRATGSVVGTATPSSTPPTMTI…	667	BPSL0280
BKP2_00252	MSNAQTLASQLVAAGQQYS	BPSL0280	135	MSNTLMNLGVSGLNAALWGLTTTGQNISNAATPGYSVERPVYAEASGQYTSSGYLPQGVSTVTVERQYNQYLSNQLNAAQTQGSSLSTYYTLVAQLNNYVGSPTAGIATAITNYFTGLQTVANNAADPSARQTAMSNAQTLASQLVAAGQQYSQLRQSVNSQLTDTVTQINSYTSQIAQLNEQIASASSQGQPPNQLLDQRDLAVSKLSQLAGVQVVQSNGNYSVFLSGGQPLVVGNASYQLATVASPSDPSELTIVSKGVAGSAQPGPTQYLPDVSLTGGALGGLLAFRSQTLDPAQAQLGALAVSFASQVNAQNALGVDMSGNPGGSLFAVGAPAVYANQNNTGSATLSVSFVDGTQPTTSDYALSYDGAKYTLTDRATGSVVGTATPSSTPPTMTI…	667	BPSL0280
BKP2_00253	NAQTLASQLVAAGQQYSQL	BPSL0280	137	MSNTLMNLGVSGLNAALWGLTTTGQNISNAATPGYSVERPVYAEASGQYTSSGYLPQGVSTVTVERQYNQYLSNQLNAAQTQGSSLSTYYTLVAQLNNYVGSPTAGIATAITNYFTGLQTVANNAADPSARQTAMSNAQTLASQLVAAGQQYSQLRQSVNSQLTDTVTQINSYTSQIAQLNEQIASASSQGQPPNQLLDQRDLAVSKLSQLAGVQVVQSNGNYSVFLSGGQPLVVGNASYQLATVASPSDPSELTIVSKGVAGSAQPGPTQYLPDVSLTGGALGGLLAFRSQTLDPAQAQLGALAVSFASQVNAQNALGVDMSGNPGGSLFAVGAPAVYANQNNTGSATLSVSFVDGTQPTTSDYALSYDGAKYTLTDRATGSVVGTATPSSTPPTMTI…	667	BPSL0280
BKP2_00254	QTLASQLVAAGQQYSQLRQ	BPSL0280	139	MSNTLMNLGVSGLNAALWGLTTTGQNISNAATPGYSVERPVYAEASGQYTSSGYLPQGVSTVTVERQYNQYLSNQLNAAQTQGSSLSTYYTLVAQLNNYVGSPTAGIATAITNYFTGLQTVANNAADPSARQTAMSNAQTLASQLVAAGQQYSQLRQSVNSQLTDTVTQINSYTSQIAQLNEQIASASSQGQPPNQLLDQRDLAVSKLSQLAGVQVVQSNGNYSVFLSGGQPLVVGNASYQLATVASPSDPSELTIVSKGVAGSAQPGPTQYLPDVSLTGGALGGLLAFRSQTLDPAQAQLGALAVSFASQVNAQNALGVDMSGNPGGSLFAVGAPAVYANQNNTGSATLSVSFVDGTQPTTSDYALSYDGAKYTLTDRATGSVVGTATPSSTPPTMTI…	667	BPSL0280
BKP2_00255	LASQLVAAGQQYSQLRQSV	BPSL0280	141	MSNTLMNLGVSGLNAALWGLTTTGQNISNAATPGYSVERPVYAEASGQYTSSGYLPQGVSTVTVERQYNQYLSNQLNAAQTQGSSLSTYYTLVAQLNNYVGSPTAGIATAITNYFTGLQTVANNAADPSARQTAMSNAQTLASQLVAAGQQYSQLRQSVNSQLTDTVTQINSYTSQIAQLNEQIASASSQGQPPNQLLDQRDLAVSKLSQLAGVQVVQSNGNYSVFLSGGQPLVVGNASYQLATVASPSDPSELTIVSKGVAGSAQPGPTQYLPDVSLTGGALGGLLAFRSQTLDPAQAQLGALAVSFASQVNAQNALGVDMSGNPGGSLFAVGAPAVYANQNNTGSATLSVSFVDGTQPTTSDYALSYDGAKYTLTDRATGSVVGTATPSSTPPTMTI…	667	BPSL0280
BKP2_00256	SQLVAAGQQYSQLRQSVNS	BPSL0280	143	MSNTLMNLGVSGLNAALWGLTTTGQNISNAATPGYSVERPVYAEASGQYTSSGYLPQGVSTVTVERQYNQYLSNQLNAAQTQGSSLSTYYTLVAQLNNYVGSPTAGIATAITNYFTGLQTVANNAADPSARQTAMSNAQTLASQLVAAGQQYSQLRQSVNSQLTDTVTQINSYTSQIAQLNEQIASASSQGQPPNQLLDQRDLAVSKLSQLAGVQVVQSNGNYSVFLSGGQPLVVGNASYQLATVASPSDPSELTIVSKGVAGSAQPGPTQYLPDVSLTGGALGGLLAFRSQTLDPAQAQLGALAVSFASQVNAQNALGVDMSGNPGGSLFAVGAPAVYANQNNTGSATLSVSFVDGTQPTTSDYALSYDGAKYTLTDRATGSVVGTATPSSTPPTMTI…	667	BPSL0280
BKP2_00257	LVAAGQQYSQLRQSVNSQL	BPSL0280	145	MSNTLMNLGVSGLNAALWGLTTTGQNISNAATPGYSVERPVYAEASGQYTSSGYLPQGVSTVTVERQYNQYLSNQLNAAQTQGSSLSTYYTLVAQLNNYVGSPTAGIATAITNYFTGLQTVANNAADPSARQTAMSNAQTLASQLVAAGQQYSQLRQSVNSQLTDTVTQINSYTSQIAQLNEQIASASSQGQPPNQLLDQRDLAVSKLSQLAGVQVVQSNGNYSVFLSGGQPLVVGNASYQLATVASPSDPSELTIVSKGVAGSAQPGPTQYLPDVSLTGGALGGLLAFRSQTLDPAQAQLGALAVSFASQVNAQNALGVDMSGNPGGSLFAVGAPAVYANQNNTGSATLSVSFVDGTQPTTSDYALSYDGAKYTLTDRATGSVVGTATPSSTPPTMTI…	667	BPSL0280
BKP2_00258	AAGQQYSQLRQSVNSQLTD	BPSL0280	147	MSNTLMNLGVSGLNAALWGLTTTGQNISNAATPGYSVERPVYAEASGQYTSSGYLPQGVSTVTVERQYNQYLSNQLNAAQTQGSSLSTYYTLVAQLNNYVGSPTAGIATAITNYFTGLQTVANNAADPSARQTAMSNAQTLASQLVAAGQQYSQLRQSVNSQLTDTVTQINSYTSQIAQLNEQIASASSQGQPPNQLLDQRDLAVSKLSQLAGVQVVQSNGNYSVFLSGGQPLVVGNASYQLATVASPSDPSELTIVSKGVAGSAQPGPTQYLPDVSLTGGALGGLLAFRSQTLDPAQAQLGALAVSFASQVNAQNALGVDMSGNPGGSLFAVGAPAVYANQNNTGSATLSVSFVDGTQPTTSDYALSYDGAKYTLTDRATGSVVGTATPSSTPPTMTI…	667	BPSL0280
BKP2_00259	GQQYSQLRQSVNSQLTDTV	BPSL0280	149	MSNTLMNLGVSGLNAALWGLTTTGQNISNAATPGYSVERPVYAEASGQYTSSGYLPQGVSTVTVERQYNQYLSNQLNAAQTQGSSLSTYYTLVAQLNNYVGSPTAGIATAITNYFTGLQTVANNAADPSARQTAMSNAQTLASQLVAAGQQYSQLRQSVNSQLTDTVTQINSYTSQIAQLNEQIASASSQGQPPNQLLDQRDLAVSKLSQLAGVQVVQSNGNYSVFLSGGQPLVVGNASYQLATVASPSDPSELTIVSKGVAGSAQPGPTQYLPDVSLTGGALGGLLAFRSQTLDPAQAQLGALAVSFASQVNAQNALGVDMSGNPGGSLFAVGAPAVYANQNNTGSATLSVSFVDGTQPTTSDYALSYDGAKYTLTDRATGSVVGTATPSSTPPTMTI…	667	BPSL0280
BKP2_00260	QYSQLRQSVNSQLTDTVTQ	BPSL0280	151	MSNTLMNLGVSGLNAALWGLTTTGQNISNAATPGYSVERPVYAEASGQYTSSGYLPQGVSTVTVERQYNQYLSNQLNAAQTQGSSLSTYYTLVAQLNNYVGSPTAGIATAITNYFTGLQTVANNAADPSARQTAMSNAQTLASQLVAAGQQYSQLRQSVNSQLTDTVTQINSYTSQIAQLNEQIASASSQGQPPNQLLDQRDLAVSKLSQLAGVQVVQSNGNYSVFLSGGQPLVVGNASYQLATVASPSDPSELTIVSKGVAGSAQPGPTQYLPDVSLTGGALGGLLAFRSQTLDPAQAQLGALAVSFASQVNAQNALGVDMSGNPGGSLFAVGAPAVYANQNNTGSATLSVSFVDGTQPTTSDYALSYDGAKYTLTDRATGSVVGTATPSSTPPTMTI…	667	BPSL0280
BKP2_00261	SQLRQSVNSQLTDTVTQIN	BPSL0280	153	MSNTLMNLGVSGLNAALWGLTTTGQNISNAATPGYSVERPVYAEASGQYTSSGYLPQGVSTVTVERQYNQYLSNQLNAAQTQGSSLSTYYTLVAQLNNYVGSPTAGIATAITNYFTGLQTVANNAADPSARQTAMSNAQTLASQLVAAGQQYSQLRQSVNSQLTDTVTQINSYTSQIAQLNEQIASASSQGQPPNQLLDQRDLAVSKLSQLAGVQVVQSNGNYSVFLSGGQPLVVGNASYQLATVASPSDPSELTIVSKGVAGSAQPGPTQYLPDVSLTGGALGGLLAFRSQTLDPAQAQLGALAVSFASQVNAQNALGVDMSGNPGGSLFAVGAPAVYANQNNTGSATLSVSFVDGTQPTTSDYALSYDGAKYTLTDRATGSVVGTATPSSTPPTMTI…	667	BPSL0280
BKP2_00262	LRQSVNSQLTDTVTQINSY	BPSL0280	155	MSNTLMNLGVSGLNAALWGLTTTGQNISNAATPGYSVERPVYAEASGQYTSSGYLPQGVSTVTVERQYNQYLSNQLNAAQTQGSSLSTYYTLVAQLNNYVGSPTAGIATAITNYFTGLQTVANNAADPSARQTAMSNAQTLASQLVAAGQQYSQLRQSVNSQLTDTVTQINSYTSQIAQLNEQIASASSQGQPPNQLLDQRDLAVSKLSQLAGVQVVQSNGNYSVFLSGGQPLVVGNASYQLATVASPSDPSELTIVSKGVAGSAQPGPTQYLPDVSLTGGALGGLLAFRSQTLDPAQAQLGALAVSFASQVNAQNALGVDMSGNPGGSLFAVGAPAVYANQNNTGSATLSVSFVDGTQPTTSDYALSYDGAKYTLTDRATGSVVGTATPSSTPPTMTI…	667	BPSL0280
BKP2_00263	QSVNSQLTDTVTQINSYTS	BPSL0280	157	MSNTLMNLGVSGLNAALWGLTTTGQNISNAATPGYSVERPVYAEASGQYTSSGYLPQGVSTVTVERQYNQYLSNQLNAAQTQGSSLSTYYTLVAQLNNYVGSPTAGIATAITNYFTGLQTVANNAADPSARQTAMSNAQTLASQLVAAGQQYSQLRQSVNSQLTDTVTQINSYTSQIAQLNEQIASASSQGQPPNQLLDQRDLAVSKLSQLAGVQVVQSNGNYSVFLSGGQPLVVGNASYQLATVASPSDPSELTIVSKGVAGSAQPGPTQYLPDVSLTGGALGGLLAFRSQTLDPAQAQLGALAVSFASQVNAQNALGVDMSGNPGGSLFAVGAPAVYANQNNTGSATLSVSFVDGTQPTTSDYALSYDGAKYTLTDRATGSVVGTATPSSTPPTMTI…	667	BPSL0280
BKP2_00264	VNSQLTDTVTQINSYTSQI	BPSL0280	159	MSNTLMNLGVSGLNAALWGLTTTGQNISNAATPGYSVERPVYAEASGQYTSSGYLPQGVSTVTVERQYNQYLSNQLNAAQTQGSSLSTYYTLVAQLNNYVGSPTAGIATAITNYFTGLQTVANNAADPSARQTAMSNAQTLASQLVAAGQQYSQLRQSVNSQLTDTVTQINSYTSQIAQLNEQIASASSQGQPPNQLLDQRDLAVSKLSQLAGVQVVQSNGNYSVFLSGGQPLVVGNASYQLATVASPSDPSELTIVSKGVAGSAQPGPTQYLPDVSLTGGALGGLLAFRSQTLDPAQAQLGALAVSFASQVNAQNALGVDMSGNPGGSLFAVGAPAVYANQNNTGSATLSVSFVDGTQPTTSDYALSYDGAKYTLTDRATGSVVGTATPSSTPPTMTI…	667	BPSL0280
BKP2_00265	SQLTDTVTQINSYTSQIAQ	BPSL0280	161	MSNTLMNLGVSGLNAALWGLTTTGQNISNAATPGYSVERPVYAEASGQYTSSGYLPQGVSTVTVERQYNQYLSNQLNAAQTQGSSLSTYYTLVAQLNNYVGSPTAGIATAITNYFTGLQTVANNAADPSARQTAMSNAQTLASQLVAAGQQYSQLRQSVNSQLTDTVTQINSYTSQIAQLNEQIASASSQGQPPNQLLDQRDLAVSKLSQLAGVQVVQSNGNYSVFLSGGQPLVVGNASYQLATVASPSDPSELTIVSKGVAGSAQPGPTQYLPDVSLTGGALGGLLAFRSQTLDPAQAQLGALAVSFASQVNAQNALGVDMSGNPGGSLFAVGAPAVYANQNNTGSATLSVSFVDGTQPTTSDYALSYDGAKYTLTDRATGSVVGTATPSSTPPTMTI…	667	BPSL0280
BKP2_00266	LTDTVTQINSYTSQIAQLN	BPSL0280	163	MSNTLMNLGVSGLNAALWGLTTTGQNISNAATPGYSVERPVYAEASGQYTSSGYLPQGVSTVTVERQYNQYLSNQLNAAQTQGSSLSTYYTLVAQLNNYVGSPTAGIATAITNYFTGLQTVANNAADPSARQTAMSNAQTLASQLVAAGQQYSQLRQSVNSQLTDTVTQINSYTSQIAQLNEQIASASSQGQPPNQLLDQRDLAVSKLSQLAGVQVVQSNGNYSVFLSGGQPLVVGNASYQLATVASPSDPSELTIVSKGVAGSAQPGPTQYLPDVSLTGGALGGLLAFRSQTLDPAQAQLGALAVSFASQVNAQNALGVDMSGNPGGSLFAVGAPAVYANQNNTGSATLSVSFVDGTQPTTSDYALSYDGAKYTLTDRATGSVVGTATPSSTPPTMTI…	667	BPSL0280
BKP2_00267	DTVTQINSYTSQIAQLNEQ	BPSL0280	165	MSNTLMNLGVSGLNAALWGLTTTGQNISNAATPGYSVERPVYAEASGQYTSSGYLPQGVSTVTVERQYNQYLSNQLNAAQTQGSSLSTYYTLVAQLNNYVGSPTAGIATAITNYFTGLQTVANNAADPSARQTAMSNAQTLASQLVAAGQQYSQLRQSVNSQLTDTVTQINSYTSQIAQLNEQIASASSQGQPPNQLLDQRDLAVSKLSQLAGVQVVQSNGNYSVFLSGGQPLVVGNASYQLATVASPSDPSELTIVSKGVAGSAQPGPTQYLPDVSLTGGALGGLLAFRSQTLDPAQAQLGALAVSFASQVNAQNALGVDMSGNPGGSLFAVGAPAVYANQNNTGSATLSVSFVDGTQPTTSDYALSYDGAKYTLTDRATGSVVGTATPSSTPPTMTI…	667	BPSL0280
BKP2_00268	VTQINSYTSQIAQLNEQIA	BPSL0280	167	MSNTLMNLGVSGLNAALWGLTTTGQNISNAATPGYSVERPVYAEASGQYTSSGYLPQGVSTVTVERQYNQYLSNQLNAAQTQGSSLSTYYTLVAQLNNYVGSPTAGIATAITNYFTGLQTVANNAADPSARQTAMSNAQTLASQLVAAGQQYSQLRQSVNSQLTDTVTQINSYTSQIAQLNEQIASASSQGQPPNQLLDQRDLAVSKLSQLAGVQVVQSNGNYSVFLSGGQPLVVGNASYQLATVASPSDPSELTIVSKGVAGSAQPGPTQYLPDVSLTGGALGGLLAFRSQTLDPAQAQLGALAVSFASQVNAQNALGVDMSGNPGGSLFAVGAPAVYANQNNTGSATLSVSFVDGTQPTTSDYALSYDGAKYTLTDRATGSVVGTATPSSTPPTMTI…	667	BPSL0280
BKP2_00269	QINSYTSQIAQLNEQIASA	BPSL0280	169	MSNTLMNLGVSGLNAALWGLTTTGQNISNAATPGYSVERPVYAEASGQYTSSGYLPQGVSTVTVERQYNQYLSNQLNAAQTQGSSLSTYYTLVAQLNNYVGSPTAGIATAITNYFTGLQTVANNAADPSARQTAMSNAQTLASQLVAAGQQYSQLRQSVNSQLTDTVTQINSYTSQIAQLNEQIASASSQGQPPNQLLDQRDLAVSKLSQLAGVQVVQSNGNYSVFLSGGQPLVVGNASYQLATVASPSDPSELTIVSKGVAGSAQPGPTQYLPDVSLTGGALGGLLAFRSQTLDPAQAQLGALAVSFASQVNAQNALGVDMSGNPGGSLFAVGAPAVYANQNNTGSATLSVSFVDGTQPTTSDYALSYDGAKYTLTDRATGSVVGTATPSSTPPTMTI…	667	BPSL0280
BKP2_00270	NSYTSQIAQLNEQIASASS	BPSL0280	171	MSNTLMNLGVSGLNAALWGLTTTGQNISNAATPGYSVERPVYAEASGQYTSSGYLPQGVSTVTVERQYNQYLSNQLNAAQTQGSSLSTYYTLVAQLNNYVGSPTAGIATAITNYFTGLQTVANNAADPSARQTAMSNAQTLASQLVAAGQQYSQLRQSVNSQLTDTVTQINSYTSQIAQLNEQIASASSQGQPPNQLLDQRDLAVSKLSQLAGVQVVQSNGNYSVFLSGGQPLVVGNASYQLATVASPSDPSELTIVSKGVAGSAQPGPTQYLPDVSLTGGALGGLLAFRSQTLDPAQAQLGALAVSFASQVNAQNALGVDMSGNPGGSLFAVGAPAVYANQNNTGSATLSVSFVDGTQPTTSDYALSYDGAKYTLTDRATGSVVGTATPSSTPPTMTI…	667	BPSL0280
BKP2_00271	YTSQIAQLNEQIASASSQG	BPSL0280	173	MSNTLMNLGVSGLNAALWGLTTTGQNISNAATPGYSVERPVYAEASGQYTSSGYLPQGVSTVTVERQYNQYLSNQLNAAQTQGSSLSTYYTLVAQLNNYVGSPTAGIATAITNYFTGLQTVANNAADPSARQTAMSNAQTLASQLVAAGQQYSQLRQSVNSQLTDTVTQINSYTSQIAQLNEQIASASSQGQPPNQLLDQRDLAVSKLSQLAGVQVVQSNGNYSVFLSGGQPLVVGNASYQLATVASPSDPSELTIVSKGVAGSAQPGPTQYLPDVSLTGGALGGLLAFRSQTLDPAQAQLGALAVSFASQVNAQNALGVDMSGNPGGSLFAVGAPAVYANQNNTGSATLSVSFVDGTQPTTSDYALSYDGAKYTLTDRATGSVVGTATPSSTPPTMTI…	667	BPSL0280
BKP2_00272	SQIAQLNEQIASASSQGQP	BPSL0280	175	MSNTLMNLGVSGLNAALWGLTTTGQNISNAATPGYSVERPVYAEASGQYTSSGYLPQGVSTVTVERQYNQYLSNQLNAAQTQGSSLSTYYTLVAQLNNYVGSPTAGIATAITNYFTGLQTVANNAADPSARQTAMSNAQTLASQLVAAGQQYSQLRQSVNSQLTDTVTQINSYTSQIAQLNEQIASASSQGQPPNQLLDQRDLAVSKLSQLAGVQVVQSNGNYSVFLSGGQPLVVGNASYQLATVASPSDPSELTIVSKGVAGSAQPGPTQYLPDVSLTGGALGGLLAFRSQTLDPAQAQLGALAVSFASQVNAQNALGVDMSGNPGGSLFAVGAPAVYANQNNTGSATLSVSFVDGTQPTTSDYALSYDGAKYTLTDRATGSVVGTATPSSTPPTMTI…	667	BPSL0280
BKP2_00273	IAQLNEQIASASSQGQPPN	BPSL0280	177	MSNTLMNLGVSGLNAALWGLTTTGQNISNAATPGYSVERPVYAEASGQYTSSGYLPQGVSTVTVERQYNQYLSNQLNAAQTQGSSLSTYYTLVAQLNNYVGSPTAGIATAITNYFTGLQTVANNAADPSARQTAMSNAQTLASQLVAAGQQYSQLRQSVNSQLTDTVTQINSYTSQIAQLNEQIASASSQGQPPNQLLDQRDLAVSKLSQLAGVQVVQSNGNYSVFLSGGQPLVVGNASYQLATVASPSDPSELTIVSKGVAGSAQPGPTQYLPDVSLTGGALGGLLAFRSQTLDPAQAQLGALAVSFASQVNAQNALGVDMSGNPGGSLFAVGAPAVYANQNNTGSATLSVSFVDGTQPTTSDYALSYDGAKYTLTDRATGSVVGTATPSSTPPTMTI…	667	BPSL0280
BKP2_00274	QLNEQIASASSQGQPPNQL	BPSL0280	179	MSNTLMNLGVSGLNAALWGLTTTGQNISNAATPGYSVERPVYAEASGQYTSSGYLPQGVSTVTVERQYNQYLSNQLNAAQTQGSSLSTYYTLVAQLNNYVGSPTAGIATAITNYFTGLQTVANNAADPSARQTAMSNAQTLASQLVAAGQQYSQLRQSVNSQLTDTVTQINSYTSQIAQLNEQIASASSQGQPPNQLLDQRDLAVSKLSQLAGVQVVQSNGNYSVFLSGGQPLVVGNASYQLATVASPSDPSELTIVSKGVAGSAQPGPTQYLPDVSLTGGALGGLLAFRSQTLDPAQAQLGALAVSFASQVNAQNALGVDMSGNPGGSLFAVGAPAVYANQNNTGSATLSVSFVDGTQPTTSDYALSYDGAKYTLTDRATGSVVGTATPSSTPPTMTI…	667	BPSL0280
BKP2_00275	NEQIASASSQGQPPNQLLD	BPSL0280	181	MSNTLMNLGVSGLNAALWGLTTTGQNISNAATPGYSVERPVYAEASGQYTSSGYLPQGVSTVTVERQYNQYLSNQLNAAQTQGSSLSTYYTLVAQLNNYVGSPTAGIATAITNYFTGLQTVANNAADPSARQTAMSNAQTLASQLVAAGQQYSQLRQSVNSQLTDTVTQINSYTSQIAQLNEQIASASSQGQPPNQLLDQRDLAVSKLSQLAGVQVVQSNGNYSVFLSGGQPLVVGNASYQLATVASPSDPSELTIVSKGVAGSAQPGPTQYLPDVSLTGGALGGLLAFRSQTLDPAQAQLGALAVSFASQVNAQNALGVDMSGNPGGSLFAVGAPAVYANQNNTGSATLSVSFVDGTQPTTSDYALSYDGAKYTLTDRATGSVVGTATPSSTPPTMTI…	667	BPSL0280
BKP2_00276	QIASASSQGQPPNQLLDQR	BPSL0280	183	MSNTLMNLGVSGLNAALWGLTTTGQNISNAATPGYSVERPVYAEASGQYTSSGYLPQGVSTVTVERQYNQYLSNQLNAAQTQGSSLSTYYTLVAQLNNYVGSPTAGIATAITNYFTGLQTVANNAADPSARQTAMSNAQTLASQLVAAGQQYSQLRQSVNSQLTDTVTQINSYTSQIAQLNEQIASASSQGQPPNQLLDQRDLAVSKLSQLAGVQVVQSNGNYSVFLSGGQPLVVGNASYQLATVASPSDPSELTIVSKGVAGSAQPGPTQYLPDVSLTGGALGGLLAFRSQTLDPAQAQLGALAVSFASQVNAQNALGVDMSGNPGGSLFAVGAPAVYANQNNTGSATLSVSFVDGTQPTTSDYALSYDGAKYTLTDRATGSVVGTATPSSTPPTMTI…	667	BPSL0280
BKP2_00277	ASASSQGQPPNQLLDQRDL	BPSL0280	185	MSNTLMNLGVSGLNAALWGLTTTGQNISNAATPGYSVERPVYAEASGQYTSSGYLPQGVSTVTVERQYNQYLSNQLNAAQTQGSSLSTYYTLVAQLNNYVGSPTAGIATAITNYFTGLQTVANNAADPSARQTAMSNAQTLASQLVAAGQQYSQLRQSVNSQLTDTVTQINSYTSQIAQLNEQIASASSQGQPPNQLLDQRDLAVSKLSQLAGVQVVQSNGNYSVFLSGGQPLVVGNASYQLATVASPSDPSELTIVSKGVAGSAQPGPTQYLPDVSLTGGALGGLLAFRSQTLDPAQAQLGALAVSFASQVNAQNALGVDMSGNPGGSLFAVGAPAVYANQNNTGSATLSVSFVDGTQPTTSDYALSYDGAKYTLTDRATGSVVGTATPSSTPPTMTI…	667	BPSL0280
BKP2_00278	ASSQGQPPNQLLDQRDLAV	BPSL0280	187	MSNTLMNLGVSGLNAALWGLTTTGQNISNAATPGYSVERPVYAEASGQYTSSGYLPQGVSTVTVERQYNQYLSNQLNAAQTQGSSLSTYYTLVAQLNNYVGSPTAGIATAITNYFTGLQTVANNAADPSARQTAMSNAQTLASQLVAAGQQYSQLRQSVNSQLTDTVTQINSYTSQIAQLNEQIASASSQGQPPNQLLDQRDLAVSKLSQLAGVQVVQSNGNYSVFLSGGQPLVVGNASYQLATVASPSDPSELTIVSKGVAGSAQPGPTQYLPDVSLTGGALGGLLAFRSQTLDPAQAQLGALAVSFASQVNAQNALGVDMSGNPGGSLFAVGAPAVYANQNNTGSATLSVSFVDGTQPTTSDYALSYDGAKYTLTDRATGSVVGTATPSSTPPTMTI…	667	BPSL0280
BKP2_00279	SQGQPPNQLLDQRDLAVSK	BPSL0280	189	MSNTLMNLGVSGLNAALWGLTTTGQNISNAATPGYSVERPVYAEASGQYTSSGYLPQGVSTVTVERQYNQYLSNQLNAAQTQGSSLSTYYTLVAQLNNYVGSPTAGIATAITNYFTGLQTVANNAADPSARQTAMSNAQTLASQLVAAGQQYSQLRQSVNSQLTDTVTQINSYTSQIAQLNEQIASASSQGQPPNQLLDQRDLAVSKLSQLAGVQVVQSNGNYSVFLSGGQPLVVGNASYQLATVASPSDPSELTIVSKGVAGSAQPGPTQYLPDVSLTGGALGGLLAFRSQTLDPAQAQLGALAVSFASQVNAQNALGVDMSGNPGGSLFAVGAPAVYANQNNTGSATLSVSFVDGTQPTTSDYALSYDGAKYTLTDRATGSVVGTATPSSTPPTMTI…	667	BPSL0280
BKP2_00280	GQPPNQLLDQRDLAVSKLS	BPSL0280	191	MSNTLMNLGVSGLNAALWGLTTTGQNISNAATPGYSVERPVYAEASGQYTSSGYLPQGVSTVTVERQYNQYLSNQLNAAQTQGSSLSTYYTLVAQLNNYVGSPTAGIATAITNYFTGLQTVANNAADPSARQTAMSNAQTLASQLVAAGQQYSQLRQSVNSQLTDTVTQINSYTSQIAQLNEQIASASSQGQPPNQLLDQRDLAVSKLSQLAGVQVVQSNGNYSVFLSGGQPLVVGNASYQLATVASPSDPSELTIVSKGVAGSAQPGPTQYLPDVSLTGGALGGLLAFRSQTLDPAQAQLGALAVSFASQVNAQNALGVDMSGNPGGSLFAVGAPAVYANQNNTGSATLSVSFVDGTQPTTSDYALSYDGAKYTLTDRATGSVVGTATPSSTPPTMTI…	667	BPSL0280
BKP2_00281	PPNQLLDQRDLAVSKLSQL	BPSL0280	193	MSNTLMNLGVSGLNAALWGLTTTGQNISNAATPGYSVERPVYAEASGQYTSSGYLPQGVSTVTVERQYNQYLSNQLNAAQTQGSSLSTYYTLVAQLNNYVGSPTAGIATAITNYFTGLQTVANNAADPSARQTAMSNAQTLASQLVAAGQQYSQLRQSVNSQLTDTVTQINSYTSQIAQLNEQIASASSQGQPPNQLLDQRDLAVSKLSQLAGVQVVQSNGNYSVFLSGGQPLVVGNASYQLATVASPSDPSELTIVSKGVAGSAQPGPTQYLPDVSLTGGALGGLLAFRSQTLDPAQAQLGALAVSFASQVNAQNALGVDMSGNPGGSLFAVGAPAVYANQNNTGSATLSVSFVDGTQPTTSDYALSYDGAKYTLTDRATGSVVGTATPSSTPPTMTI…	667	BPSL0280
BKP2_00282	NQLLDQRDLAVSKLSQLAG	BPSL0280	195	MSNTLMNLGVSGLNAALWGLTTTGQNISNAATPGYSVERPVYAEASGQYTSSGYLPQGVSTVTVERQYNQYLSNQLNAAQTQGSSLSTYYTLVAQLNNYVGSPTAGIATAITNYFTGLQTVANNAADPSARQTAMSNAQTLASQLVAAGQQYSQLRQSVNSQLTDTVTQINSYTSQIAQLNEQIASASSQGQPPNQLLDQRDLAVSKLSQLAGVQVVQSNGNYSVFLSGGQPLVVGNASYQLATVASPSDPSELTIVSKGVAGSAQPGPTQYLPDVSLTGGALGGLLAFRSQTLDPAQAQLGALAVSFASQVNAQNALGVDMSGNPGGSLFAVGAPAVYANQNNTGSATLSVSFVDGTQPTTSDYALSYDGAKYTLTDRATGSVVGTATPSSTPPTMTI…	667	BPSL0280
BKP2_00283	LLDQRDLAVSKLSQLAGVQ	BPSL0280	197	MSNTLMNLGVSGLNAALWGLTTTGQNISNAATPGYSVERPVYAEASGQYTSSGYLPQGVSTVTVERQYNQYLSNQLNAAQTQGSSLSTYYTLVAQLNNYVGSPTAGIATAITNYFTGLQTVANNAADPSARQTAMSNAQTLASQLVAAGQQYSQLRQSVNSQLTDTVTQINSYTSQIAQLNEQIASASSQGQPPNQLLDQRDLAVSKLSQLAGVQVVQSNGNYSVFLSGGQPLVVGNASYQLATVASPSDPSELTIVSKGVAGSAQPGPTQYLPDVSLTGGALGGLLAFRSQTLDPAQAQLGALAVSFASQVNAQNALGVDMSGNPGGSLFAVGAPAVYANQNNTGSATLSVSFVDGTQPTTSDYALSYDGAKYTLTDRATGSVVGTATPSSTPPTMTI…	667	BPSL0280
BKP2_00284	DQRDLAVSKLSQLAGVQVV	BPSL0280	199	MSNTLMNLGVSGLNAALWGLTTTGQNISNAATPGYSVERPVYAEASGQYTSSGYLPQGVSTVTVERQYNQYLSNQLNAAQTQGSSLSTYYTLVAQLNNYVGSPTAGIATAITNYFTGLQTVANNAADPSARQTAMSNAQTLASQLVAAGQQYSQLRQSVNSQLTDTVTQINSYTSQIAQLNEQIASASSQGQPPNQLLDQRDLAVSKLSQLAGVQVVQSNGNYSVFLSGGQPLVVGNASYQLATVASPSDPSELTIVSKGVAGSAQPGPTQYLPDVSLTGGALGGLLAFRSQTLDPAQAQLGALAVSFASQVNAQNALGVDMSGNPGGSLFAVGAPAVYANQNNTGSATLSVSFVDGTQPTTSDYALSYDGAKYTLTDRATGSVVGTATPSSTPPTMTI…	667	BPSL0280
BKP2_00285	RDLAVSKLSQLAGVQVVQS	BPSL0280	201	MSNTLMNLGVSGLNAALWGLTTTGQNISNAATPGYSVERPVYAEASGQYTSSGYLPQGVSTVTVERQYNQYLSNQLNAAQTQGSSLSTYYTLVAQLNNYVGSPTAGIATAITNYFTGLQTVANNAADPSARQTAMSNAQTLASQLVAAGQQYSQLRQSVNSQLTDTVTQINSYTSQIAQLNEQIASASSQGQPPNQLLDQRDLAVSKLSQLAGVQVVQSNGNYSVFLSGGQPLVVGNASYQLATVASPSDPSELTIVSKGVAGSAQPGPTQYLPDVSLTGGALGGLLAFRSQTLDPAQAQLGALAVSFASQVNAQNALGVDMSGNPGGSLFAVGAPAVYANQNNTGSATLSVSFVDGTQPTTSDYALSYDGAKYTLTDRATGSVVGTATPSSTPPTMTI…	667	BPSL0280
BKP2_00286	LAVSKLSQLAGVQVVQSNG	BPSL0280	203	MSNTLMNLGVSGLNAALWGLTTTGQNISNAATPGYSVERPVYAEASGQYTSSGYLPQGVSTVTVERQYNQYLSNQLNAAQTQGSSLSTYYTLVAQLNNYVGSPTAGIATAITNYFTGLQTVANNAADPSARQTAMSNAQTLASQLVAAGQQYSQLRQSVNSQLTDTVTQINSYTSQIAQLNEQIASASSQGQPPNQLLDQRDLAVSKLSQLAGVQVVQSNGNYSVFLSGGQPLVVGNASYQLATVASPSDPSELTIVSKGVAGSAQPGPTQYLPDVSLTGGALGGLLAFRSQTLDPAQAQLGALAVSFASQVNAQNALGVDMSGNPGGSLFAVGAPAVYANQNNTGSATLSVSFVDGTQPTTSDYALSYDGAKYTLTDRATGSVVGTATPSSTPPTMTI…	667	BPSL0280
BKP2_00287	VSKLSQLAGVQVVQSNGNY	BPSL0280	205	MSNTLMNLGVSGLNAALWGLTTTGQNISNAATPGYSVERPVYAEASGQYTSSGYLPQGVSTVTVERQYNQYLSNQLNAAQTQGSSLSTYYTLVAQLNNYVGSPTAGIATAITNYFTGLQTVANNAADPSARQTAMSNAQTLASQLVAAGQQYSQLRQSVNSQLTDTVTQINSYTSQIAQLNEQIASASSQGQPPNQLLDQRDLAVSKLSQLAGVQVVQSNGNYSVFLSGGQPLVVGNASYQLATVASPSDPSELTIVSKGVAGSAQPGPTQYLPDVSLTGGALGGLLAFRSQTLDPAQAQLGALAVSFASQVNAQNALGVDMSGNPGGSLFAVGAPAVYANQNNTGSATLSVSFVDGTQPTTSDYALSYDGAKYTLTDRATGSVVGTATPSSTPPTMTI…	667	BPSL0280
BKP2_00288	KLSQLAGVQVVQSNGNYSV	BPSL0280	207	MSNTLMNLGVSGLNAALWGLTTTGQNISNAATPGYSVERPVYAEASGQYTSSGYLPQGVSTVTVERQYNQYLSNQLNAAQTQGSSLSTYYTLVAQLNNYVGSPTAGIATAITNYFTGLQTVANNAADPSARQTAMSNAQTLASQLVAAGQQYSQLRQSVNSQLTDTVTQINSYTSQIAQLNEQIASASSQGQPPNQLLDQRDLAVSKLSQLAGVQVVQSNGNYSVFLSGGQPLVVGNASYQLATVASPSDPSELTIVSKGVAGSAQPGPTQYLPDVSLTGGALGGLLAFRSQTLDPAQAQLGALAVSFASQVNAQNALGVDMSGNPGGSLFAVGAPAVYANQNNTGSATLSVSFVDGTQPTTSDYALSYDGAKYTLTDRATGSVVGTATPSSTPPTMTI…	667	BPSL0280
BKP2_00289	SQLAGVQVVQSNGNYSVFL	BPSL0280	209	MSNTLMNLGVSGLNAALWGLTTTGQNISNAATPGYSVERPVYAEASGQYTSSGYLPQGVSTVTVERQYNQYLSNQLNAAQTQGSSLSTYYTLVAQLNNYVGSPTAGIATAITNYFTGLQTVANNAADPSARQTAMSNAQTLASQLVAAGQQYSQLRQSVNSQLTDTVTQINSYTSQIAQLNEQIASASSQGQPPNQLLDQRDLAVSKLSQLAGVQVVQSNGNYSVFLSGGQPLVVGNASYQLATVASPSDPSELTIVSKGVAGSAQPGPTQYLPDVSLTGGALGGLLAFRSQTLDPAQAQLGALAVSFASQVNAQNALGVDMSGNPGGSLFAVGAPAVYANQNNTGSATLSVSFVDGTQPTTSDYALSYDGAKYTLTDRATGSVVGTATPSSTPPTMTI…	667	BPSL0280
BKP2_00290	LAGVQVVQSNGNYSVFLSG	BPSL0280	211	MSNTLMNLGVSGLNAALWGLTTTGQNISNAATPGYSVERPVYAEASGQYTSSGYLPQGVSTVTVERQYNQYLSNQLNAAQTQGSSLSTYYTLVAQLNNYVGSPTAGIATAITNYFTGLQTVANNAADPSARQTAMSNAQTLASQLVAAGQQYSQLRQSVNSQLTDTVTQINSYTSQIAQLNEQIASASSQGQPPNQLLDQRDLAVSKLSQLAGVQVVQSNGNYSVFLSGGQPLVVGNASYQLATVASPSDPSELTIVSKGVAGSAQPGPTQYLPDVSLTGGALGGLLAFRSQTLDPAQAQLGALAVSFASQVNAQNALGVDMSGNPGGSLFAVGAPAVYANQNNTGSATLSVSFVDGTQPTTSDYALSYDGAKYTLTDRATGSVVGTATPSSTPPTMTI…	667	BPSL0280
BKP2_00291	GVQVVQSNGNYSVFLSGGQ	BPSL0280	213	MSNTLMNLGVSGLNAALWGLTTTGQNISNAATPGYSVERPVYAEASGQYTSSGYLPQGVSTVTVERQYNQYLSNQLNAAQTQGSSLSTYYTLVAQLNNYVGSPTAGIATAITNYFTGLQTVANNAADPSARQTAMSNAQTLASQLVAAGQQYSQLRQSVNSQLTDTVTQINSYTSQIAQLNEQIASASSQGQPPNQLLDQRDLAVSKLSQLAGVQVVQSNGNYSVFLSGGQPLVVGNASYQLATVASPSDPSELTIVSKGVAGSAQPGPTQYLPDVSLTGGALGGLLAFRSQTLDPAQAQLGALAVSFASQVNAQNALGVDMSGNPGGSLFAVGAPAVYANQNNTGSATLSVSFVDGTQPTTSDYALSYDGAKYTLTDRATGSVVGTATPSSTPPTMTI…	667	BPSL0280
BKP2_00292	QVVQSNGNYSVFLSGGQPL	BPSL0280	215	MSNTLMNLGVSGLNAALWGLTTTGQNISNAATPGYSVERPVYAEASGQYTSSGYLPQGVSTVTVERQYNQYLSNQLNAAQTQGSSLSTYYTLVAQLNNYVGSPTAGIATAITNYFTGLQTVANNAADPSARQTAMSNAQTLASQLVAAGQQYSQLRQSVNSQLTDTVTQINSYTSQIAQLNEQIASASSQGQPPNQLLDQRDLAVSKLSQLAGVQVVQSNGNYSVFLSGGQPLVVGNASYQLATVASPSDPSELTIVSKGVAGSAQPGPTQYLPDVSLTGGALGGLLAFRSQTLDPAQAQLGALAVSFASQVNAQNALGVDMSGNPGGSLFAVGAPAVYANQNNTGSATLSVSFVDGTQPTTSDYALSYDGAKYTLTDRATGSVVGTATPSSTPPTMTI…	667	BPSL0280
BKP2_00293	VQSNGNYSVFLSGGQPLVV	BPSL0280	217	MSNTLMNLGVSGLNAALWGLTTTGQNISNAATPGYSVERPVYAEASGQYTSSGYLPQGVSTVTVERQYNQYLSNQLNAAQTQGSSLSTYYTLVAQLNNYVGSPTAGIATAITNYFTGLQTVANNAADPSARQTAMSNAQTLASQLVAAGQQYSQLRQSVNSQLTDTVTQINSYTSQIAQLNEQIASASSQGQPPNQLLDQRDLAVSKLSQLAGVQVVQSNGNYSVFLSGGQPLVVGNASYQLATVASPSDPSELTIVSKGVAGSAQPGPTQYLPDVSLTGGALGGLLAFRSQTLDPAQAQLGALAVSFASQVNAQNALGVDMSGNPGGSLFAVGAPAVYANQNNTGSATLSVSFVDGTQPTTSDYALSYDGAKYTLTDRATGSVVGTATPSSTPPTMTI…	667	BPSL0280
BKP2_00294	SNGNYSVFLSGGQPLVVGN	BPSL0280	219	MSNTLMNLGVSGLNAALWGLTTTGQNISNAATPGYSVERPVYAEASGQYTSSGYLPQGVSTVTVERQYNQYLSNQLNAAQTQGSSLSTYYTLVAQLNNYVGSPTAGIATAITNYFTGLQTVANNAADPSARQTAMSNAQTLASQLVAAGQQYSQLRQSVNSQLTDTVTQINSYTSQIAQLNEQIASASSQGQPPNQLLDQRDLAVSKLSQLAGVQVVQSNGNYSVFLSGGQPLVVGNASYQLATVASPSDPSELTIVSKGVAGSAQPGPTQYLPDVSLTGGALGGLLAFRSQTLDPAQAQLGALAVSFASQVNAQNALGVDMSGNPGGSLFAVGAPAVYANQNNTGSATLSVSFVDGTQPTTSDYALSYDGAKYTLTDRATGSVVGTATPSSTPPTMTI…	667	BPSL0280
BKP2_00295	GNYSVFLSGGQPLVVGNAS	BPSL0280	221	MSNTLMNLGVSGLNAALWGLTTTGQNISNAATPGYSVERPVYAEASGQYTSSGYLPQGVSTVTVERQYNQYLSNQLNAAQTQGSSLSTYYTLVAQLNNYVGSPTAGIATAITNYFTGLQTVANNAADPSARQTAMSNAQTLASQLVAAGQQYSQLRQSVNSQLTDTVTQINSYTSQIAQLNEQIASASSQGQPPNQLLDQRDLAVSKLSQLAGVQVVQSNGNYSVFLSGGQPLVVGNASYQLATVASPSDPSELTIVSKGVAGSAQPGPTQYLPDVSLTGGALGGLLAFRSQTLDPAQAQLGALAVSFASQVNAQNALGVDMSGNPGGSLFAVGAPAVYANQNNTGSATLSVSFVDGTQPTTSDYALSYDGAKYTLTDRATGSVVGTATPSSTPPTMTI…	667	BPSL0280
BKP2_00296	YSVFLSGGQPLVVGNASYQ	BPSL0280	223	MSNTLMNLGVSGLNAALWGLTTTGQNISNAATPGYSVERPVYAEASGQYTSSGYLPQGVSTVTVERQYNQYLSNQLNAAQTQGSSLSTYYTLVAQLNNYVGSPTAGIATAITNYFTGLQTVANNAADPSARQTAMSNAQTLASQLVAAGQQYSQLRQSVNSQLTDTVTQINSYTSQIAQLNEQIASASSQGQPPNQLLDQRDLAVSKLSQLAGVQVVQSNGNYSVFLSGGQPLVVGNASYQLATVASPSDPSELTIVSKGVAGSAQPGPTQYLPDVSLTGGALGGLLAFRSQTLDPAQAQLGALAVSFASQVNAQNALGVDMSGNPGGSLFAVGAPAVYANQNNTGSATLSVSFVDGTQPTTSDYALSYDGAKYTLTDRATGSVVGTATPSSTPPTMTI…	667	BPSL0280
BKP2_00297	VFLSGGQPLVVGNASYQLA	BPSL0280	225	MSNTLMNLGVSGLNAALWGLTTTGQNISNAATPGYSVERPVYAEASGQYTSSGYLPQGVSTVTVERQYNQYLSNQLNAAQTQGSSLSTYYTLVAQLNNYVGSPTAGIATAITNYFTGLQTVANNAADPSARQTAMSNAQTLASQLVAAGQQYSQLRQSVNSQLTDTVTQINSYTSQIAQLNEQIASASSQGQPPNQLLDQRDLAVSKLSQLAGVQVVQSNGNYSVFLSGGQPLVVGNASYQLATVASPSDPSELTIVSKGVAGSAQPGPTQYLPDVSLTGGALGGLLAFRSQTLDPAQAQLGALAVSFASQVNAQNALGVDMSGNPGGSLFAVGAPAVYANQNNTGSATLSVSFVDGTQPTTSDYALSYDGAKYTLTDRATGSVVGTATPSSTPPTMTI…	667	BPSL0280
BKP2_00298	LSGGQPLVVGNASYQLATV	BPSL0280	227	MSNTLMNLGVSGLNAALWGLTTTGQNISNAATPGYSVERPVYAEASGQYTSSGYLPQGVSTVTVERQYNQYLSNQLNAAQTQGSSLSTYYTLVAQLNNYVGSPTAGIATAITNYFTGLQTVANNAADPSARQTAMSNAQTLASQLVAAGQQYSQLRQSVNSQLTDTVTQINSYTSQIAQLNEQIASASSQGQPPNQLLDQRDLAVSKLSQLAGVQVVQSNGNYSVFLSGGQPLVVGNASYQLATVASPSDPSELTIVSKGVAGSAQPGPTQYLPDVSLTGGALGGLLAFRSQTLDPAQAQLGALAVSFASQVNAQNALGVDMSGNPGGSLFAVGAPAVYANQNNTGSATLSVSFVDGTQPTTSDYALSYDGAKYTLTDRATGSVVGTATPSSTPPTMTI…	667	BPSL0280
BKP2_00299	GGQPLVVGNASYQLATVAS	BPSL0280	229	MSNTLMNLGVSGLNAALWGLTTTGQNISNAATPGYSVERPVYAEASGQYTSSGYLPQGVSTVTVERQYNQYLSNQLNAAQTQGSSLSTYYTLVAQLNNYVGSPTAGIATAITNYFTGLQTVANNAADPSARQTAMSNAQTLASQLVAAGQQYSQLRQSVNSQLTDTVTQINSYTSQIAQLNEQIASASSQGQPPNQLLDQRDLAVSKLSQLAGVQVVQSNGNYSVFLSGGQPLVVGNASYQLATVASPSDPSELTIVSKGVAGSAQPGPTQYLPDVSLTGGALGGLLAFRSQTLDPAQAQLGALAVSFASQVNAQNALGVDMSGNPGGSLFAVGAPAVYANQNNTGSATLSVSFVDGTQPTTSDYALSYDGAKYTLTDRATGSVVGTATPSSTPPTMTI…	667	BPSL0280
BKP2_00300	QPLVVGNASYQLATVASPS	BPSL0280	231	MSNTLMNLGVSGLNAALWGLTTTGQNISNAATPGYSVERPVYAEASGQYTSSGYLPQGVSTVTVERQYNQYLSNQLNAAQTQGSSLSTYYTLVAQLNNYVGSPTAGIATAITNYFTGLQTVANNAADPSARQTAMSNAQTLASQLVAAGQQYSQLRQSVNSQLTDTVTQINSYTSQIAQLNEQIASASSQGQPPNQLLDQRDLAVSKLSQLAGVQVVQSNGNYSVFLSGGQPLVVGNASYQLATVASPSDPSELTIVSKGVAGSAQPGPTQYLPDVSLTGGALGGLLAFRSQTLDPAQAQLGALAVSFASQVNAQNALGVDMSGNPGGSLFAVGAPAVYANQNNTGSATLSVSFVDGTQPTTSDYALSYDGAKYTLTDRATGSVVGTATPSSTPPTMTI…	667	BPSL0280
BKP2_00301	LVVGNASYQLATVASPSDP	BPSL0280	233	MSNTLMNLGVSGLNAALWGLTTTGQNISNAATPGYSVERPVYAEASGQYTSSGYLPQGVSTVTVERQYNQYLSNQLNAAQTQGSSLSTYYTLVAQLNNYVGSPTAGIATAITNYFTGLQTVANNAADPSARQTAMSNAQTLASQLVAAGQQYSQLRQSVNSQLTDTVTQINSYTSQIAQLNEQIASASSQGQPPNQLLDQRDLAVSKLSQLAGVQVVQSNGNYSVFLSGGQPLVVGNASYQLATVASPSDPSELTIVSKGVAGSAQPGPTQYLPDVSLTGGALGGLLAFRSQTLDPAQAQLGALAVSFASQVNAQNALGVDMSGNPGGSLFAVGAPAVYANQNNTGSATLSVSFVDGTQPTTSDYALSYDGAKYTLTDRATGSVVGTATPSSTPPTMTI…	667	BPSL0280
BKP2_00302	VGNASYQLATVASPSDPSE	BPSL0280	235	MSNTLMNLGVSGLNAALWGLTTTGQNISNAATPGYSVERPVYAEASGQYTSSGYLPQGVSTVTVERQYNQYLSNQLNAAQTQGSSLSTYYTLVAQLNNYVGSPTAGIATAITNYFTGLQTVANNAADPSARQTAMSNAQTLASQLVAAGQQYSQLRQSVNSQLTDTVTQINSYTSQIAQLNEQIASASSQGQPPNQLLDQRDLAVSKLSQLAGVQVVQSNGNYSVFLSGGQPLVVGNASYQLATVASPSDPSELTIVSKGVAGSAQPGPTQYLPDVSLTGGALGGLLAFRSQTLDPAQAQLGALAVSFASQVNAQNALGVDMSGNPGGSLFAVGAPAVYANQNNTGSATLSVSFVDGTQPTTSDYALSYDGAKYTLTDRATGSVVGTATPSSTPPTMTI…	667	BPSL0280
BKP2_00303	NASYQLATVASPSDPSELT	BPSL0280	237	MSNTLMNLGVSGLNAALWGLTTTGQNISNAATPGYSVERPVYAEASGQYTSSGYLPQGVSTVTVERQYNQYLSNQLNAAQTQGSSLSTYYTLVAQLNNYVGSPTAGIATAITNYFTGLQTVANNAADPSARQTAMSNAQTLASQLVAAGQQYSQLRQSVNSQLTDTVTQINSYTSQIAQLNEQIASASSQGQPPNQLLDQRDLAVSKLSQLAGVQVVQSNGNYSVFLSGGQPLVVGNASYQLATVASPSDPSELTIVSKGVAGSAQPGPTQYLPDVSLTGGALGGLLAFRSQTLDPAQAQLGALAVSFASQVNAQNALGVDMSGNPGGSLFAVGAPAVYANQNNTGSATLSVSFVDGTQPTTSDYALSYDGAKYTLTDRATGSVVGTATPSSTPPTMTI…	667	BPSL0280
BKP2_00304	SYQLATVASPSDPSELTIV	BPSL0280	239	MSNTLMNLGVSGLNAALWGLTTTGQNISNAATPGYSVERPVYAEASGQYTSSGYLPQGVSTVTVERQYNQYLSNQLNAAQTQGSSLSTYYTLVAQLNNYVGSPTAGIATAITNYFTGLQTVANNAADPSARQTAMSNAQTLASQLVAAGQQYSQLRQSVNSQLTDTVTQINSYTSQIAQLNEQIASASSQGQPPNQLLDQRDLAVSKLSQLAGVQVVQSNGNYSVFLSGGQPLVVGNASYQLATVASPSDPSELTIVSKGVAGSAQPGPTQYLPDVSLTGGALGGLLAFRSQTLDPAQAQLGALAVSFASQVNAQNALGVDMSGNPGGSLFAVGAPAVYANQNNTGSATLSVSFVDGTQPTTSDYALSYDGAKYTLTDRATGSVVGTATPSSTPPTMTI…	667	BPSL0280
BKP2_00305	QLATVASPSDPSELTIVSK	BPSL0280	241	MSNTLMNLGVSGLNAALWGLTTTGQNISNAATPGYSVERPVYAEASGQYTSSGYLPQGVSTVTVERQYNQYLSNQLNAAQTQGSSLSTYYTLVAQLNNYVGSPTAGIATAITNYFTGLQTVANNAADPSARQTAMSNAQTLASQLVAAGQQYSQLRQSVNSQLTDTVTQINSYTSQIAQLNEQIASASSQGQPPNQLLDQRDLAVSKLSQLAGVQVVQSNGNYSVFLSGGQPLVVGNASYQLATVASPSDPSELTIVSKGVAGSAQPGPTQYLPDVSLTGGALGGLLAFRSQTLDPAQAQLGALAVSFASQVNAQNALGVDMSGNPGGSLFAVGAPAVYANQNNTGSATLSVSFVDGTQPTTSDYALSYDGAKYTLTDRATGSVVGTATPSSTPPTMTI…	667	BPSL0280
BKP2_00306	ATVASPSDPSELTIVSKGV	BPSL0280	243	MSNTLMNLGVSGLNAALWGLTTTGQNISNAATPGYSVERPVYAEASGQYTSSGYLPQGVSTVTVERQYNQYLSNQLNAAQTQGSSLSTYYTLVAQLNNYVGSPTAGIATAITNYFTGLQTVANNAADPSARQTAMSNAQTLASQLVAAGQQYSQLRQSVNSQLTDTVTQINSYTSQIAQLNEQIASASSQGQPPNQLLDQRDLAVSKLSQLAGVQVVQSNGNYSVFLSGGQPLVVGNASYQLATVASPSDPSELTIVSKGVAGSAQPGPTQYLPDVSLTGGALGGLLAFRSQTLDPAQAQLGALAVSFASQVNAQNALGVDMSGNPGGSLFAVGAPAVYANQNNTGSATLSVSFVDGTQPTTSDYALSYDGAKYTLTDRATGSVVGTATPSSTPPTMTI…	667	BPSL0280
BKP2_00307	VASPSDPSELTIVSKGVAG	BPSL0280	245	MSNTLMNLGVSGLNAALWGLTTTGQNISNAATPGYSVERPVYAEASGQYTSSGYLPQGVSTVTVERQYNQYLSNQLNAAQTQGSSLSTYYTLVAQLNNYVGSPTAGIATAITNYFTGLQTVANNAADPSARQTAMSNAQTLASQLVAAGQQYSQLRQSVNSQLTDTVTQINSYTSQIAQLNEQIASASSQGQPPNQLLDQRDLAVSKLSQLAGVQVVQSNGNYSVFLSGGQPLVVGNASYQLATVASPSDPSELTIVSKGVAGSAQPGPTQYLPDVSLTGGALGGLLAFRSQTLDPAQAQLGALAVSFASQVNAQNALGVDMSGNPGGSLFAVGAPAVYANQNNTGSATLSVSFVDGTQPTTSDYALSYDGAKYTLTDRATGSVVGTATPSSTPPTMTI…	667	BPSL0280
BKP2_00308	SPSDPSELTIVSKGVAGSA	BPSL0280	247	MSNTLMNLGVSGLNAALWGLTTTGQNISNAATPGYSVERPVYAEASGQYTSSGYLPQGVSTVTVERQYNQYLSNQLNAAQTQGSSLSTYYTLVAQLNNYVGSPTAGIATAITNYFTGLQTVANNAADPSARQTAMSNAQTLASQLVAAGQQYSQLRQSVNSQLTDTVTQINSYTSQIAQLNEQIASASSQGQPPNQLLDQRDLAVSKLSQLAGVQVVQSNGNYSVFLSGGQPLVVGNASYQLATVASPSDPSELTIVSKGVAGSAQPGPTQYLPDVSLTGGALGGLLAFRSQTLDPAQAQLGALAVSFASQVNAQNALGVDMSGNPGGSLFAVGAPAVYANQNNTGSATLSVSFVDGTQPTTSDYALSYDGAKYTLTDRATGSVVGTATPSSTPPTMTI…	667	BPSL0280
BKP2_00309	SDPSELTIVSKGVAGSAQP	BPSL0280	249	MSNTLMNLGVSGLNAALWGLTTTGQNISNAATPGYSVERPVYAEASGQYTSSGYLPQGVSTVTVERQYNQYLSNQLNAAQTQGSSLSTYYTLVAQLNNYVGSPTAGIATAITNYFTGLQTVANNAADPSARQTAMSNAQTLASQLVAAGQQYSQLRQSVNSQLTDTVTQINSYTSQIAQLNEQIASASSQGQPPNQLLDQRDLAVSKLSQLAGVQVVQSNGNYSVFLSGGQPLVVGNASYQLATVASPSDPSELTIVSKGVAGSAQPGPTQYLPDVSLTGGALGGLLAFRSQTLDPAQAQLGALAVSFASQVNAQNALGVDMSGNPGGSLFAVGAPAVYANQNNTGSATLSVSFVDGTQPTTSDYALSYDGAKYTLTDRATGSVVGTATPSSTPPTMTI…	667	BPSL0280
BKP2_00310	PSELTIVSKGVAGSAQPGP	BPSL0280	251	MSNTLMNLGVSGLNAALWGLTTTGQNISNAATPGYSVERPVYAEASGQYTSSGYLPQGVSTVTVERQYNQYLSNQLNAAQTQGSSLSTYYTLVAQLNNYVGSPTAGIATAITNYFTGLQTVANNAADPSARQTAMSNAQTLASQLVAAGQQYSQLRQSVNSQLTDTVTQINSYTSQIAQLNEQIASASSQGQPPNQLLDQRDLAVSKLSQLAGVQVVQSNGNYSVFLSGGQPLVVGNASYQLATVASPSDPSELTIVSKGVAGSAQPGPTQYLPDVSLTGGALGGLLAFRSQTLDPAQAQLGALAVSFASQVNAQNALGVDMSGNPGGSLFAVGAPAVYANQNNTGSATLSVSFVDGTQPTTSDYALSYDGAKYTLTDRATGSVVGTATPSSTPPTMTI…	667	BPSL0280
BKP2_00311	ELTIVSKGVAGSAQPGPTQ	BPSL0280	253	MSNTLMNLGVSGLNAALWGLTTTGQNISNAATPGYSVERPVYAEASGQYTSSGYLPQGVSTVTVERQYNQYLSNQLNAAQTQGSSLSTYYTLVAQLNNYVGSPTAGIATAITNYFTGLQTVANNAADPSARQTAMSNAQTLASQLVAAGQQYSQLRQSVNSQLTDTVTQINSYTSQIAQLNEQIASASSQGQPPNQLLDQRDLAVSKLSQLAGVQVVQSNGNYSVFLSGGQPLVVGNASYQLATVASPSDPSELTIVSKGVAGSAQPGPTQYLPDVSLTGGALGGLLAFRSQTLDPAQAQLGALAVSFASQVNAQNALGVDMSGNPGGSLFAVGAPAVYANQNNTGSATLSVSFVDGTQPTTSDYALSYDGAKYTLTDRATGSVVGTATPSSTPPTMTI…	667	BPSL0280
BKP2_00312	TIVSKGVAGSAQPGPTQYL	BPSL0280	255	MSNTLMNLGVSGLNAALWGLTTTGQNISNAATPGYSVERPVYAEASGQYTSSGYLPQGVSTVTVERQYNQYLSNQLNAAQTQGSSLSTYYTLVAQLNNYVGSPTAGIATAITNYFTGLQTVANNAADPSARQTAMSNAQTLASQLVAAGQQYSQLRQSVNSQLTDTVTQINSYTSQIAQLNEQIASASSQGQPPNQLLDQRDLAVSKLSQLAGVQVVQSNGNYSVFLSGGQPLVVGNASYQLATVASPSDPSELTIVSKGVAGSAQPGPTQYLPDVSLTGGALGGLLAFRSQTLDPAQAQLGALAVSFASQVNAQNALGVDMSGNPGGSLFAVGAPAVYANQNNTGSATLSVSFVDGTQPTTSDYALSYDGAKYTLTDRATGSVVGTATPSSTPPTMTI…	667	BPSL0280
BKP2_00313	VSKGVAGSAQPGPTQYLPD	BPSL0280	257	MSNTLMNLGVSGLNAALWGLTTTGQNISNAATPGYSVERPVYAEASGQYTSSGYLPQGVSTVTVERQYNQYLSNQLNAAQTQGSSLSTYYTLVAQLNNYVGSPTAGIATAITNYFTGLQTVANNAADPSARQTAMSNAQTLASQLVAAGQQYSQLRQSVNSQLTDTVTQINSYTSQIAQLNEQIASASSQGQPPNQLLDQRDLAVSKLSQLAGVQVVQSNGNYSVFLSGGQPLVVGNASYQLATVASPSDPSELTIVSKGVAGSAQPGPTQYLPDVSLTGGALGGLLAFRSQTLDPAQAQLGALAVSFASQVNAQNALGVDMSGNPGGSLFAVGAPAVYANQNNTGSATLSVSFVDGTQPTTSDYALSYDGAKYTLTDRATGSVVGTATPSSTPPTMTI…	667	BPSL0280
BKP2_00314	KGVAGSAQPGPTQYLPDVS	BPSL0280	259	MSNTLMNLGVSGLNAALWGLTTTGQNISNAATPGYSVERPVYAEASGQYTSSGYLPQGVSTVTVERQYNQYLSNQLNAAQTQGSSLSTYYTLVAQLNNYVGSPTAGIATAITNYFTGLQTVANNAADPSARQTAMSNAQTLASQLVAAGQQYSQLRQSVNSQLTDTVTQINSYTSQIAQLNEQIASASSQGQPPNQLLDQRDLAVSKLSQLAGVQVVQSNGNYSVFLSGGQPLVVGNASYQLATVASPSDPSELTIVSKGVAGSAQPGPTQYLPDVSLTGGALGGLLAFRSQTLDPAQAQLGALAVSFASQVNAQNALGVDMSGNPGGSLFAVGAPAVYANQNNTGSATLSVSFVDGTQPTTSDYALSYDGAKYTLTDRATGSVVGTATPSSTPPTMTI…	667	BPSL0280
BKP2_00315	VAGSAQPGPTQYLPDVSLT	BPSL0280	261	MSNTLMNLGVSGLNAALWGLTTTGQNISNAATPGYSVERPVYAEASGQYTSSGYLPQGVSTVTVERQYNQYLSNQLNAAQTQGSSLSTYYTLVAQLNNYVGSPTAGIATAITNYFTGLQTVANNAADPSARQTAMSNAQTLASQLVAAGQQYSQLRQSVNSQLTDTVTQINSYTSQIAQLNEQIASASSQGQPPNQLLDQRDLAVSKLSQLAGVQVVQSNGNYSVFLSGGQPLVVGNASYQLATVASPSDPSELTIVSKGVAGSAQPGPTQYLPDVSLTGGALGGLLAFRSQTLDPAQAQLGALAVSFASQVNAQNALGVDMSGNPGGSLFAVGAPAVYANQNNTGSATLSVSFVDGTQPTTSDYALSYDGAKYTLTDRATGSVVGTATPSSTPPTMTI…	667	BPSL0280
BKP2_00316	GSAQPGPTQYLPDVSLTGG	BPSL0280	263	MSNTLMNLGVSGLNAALWGLTTTGQNISNAATPGYSVERPVYAEASGQYTSSGYLPQGVSTVTVERQYNQYLSNQLNAAQTQGSSLSTYYTLVAQLNNYVGSPTAGIATAITNYFTGLQTVANNAADPSARQTAMSNAQTLASQLVAAGQQYSQLRQSVNSQLTDTVTQINSYTSQIAQLNEQIASASSQGQPPNQLLDQRDLAVSKLSQLAGVQVVQSNGNYSVFLSGGQPLVVGNASYQLATVASPSDPSELTIVSKGVAGSAQPGPTQYLPDVSLTGGALGGLLAFRSQTLDPAQAQLGALAVSFASQVNAQNALGVDMSGNPGGSLFAVGAPAVYANQNNTGSATLSVSFVDGTQPTTSDYALSYDGAKYTLTDRATGSVVGTATPSSTPPTMTI…	667	BPSL0280
BKP2_00317	AQPGPTQYLPDVSLTGGAL	BPSL0280	265	MSNTLMNLGVSGLNAALWGLTTTGQNISNAATPGYSVERPVYAEASGQYTSSGYLPQGVSTVTVERQYNQYLSNQLNAAQTQGSSLSTYYTLVAQLNNYVGSPTAGIATAITNYFTGLQTVANNAADPSARQTAMSNAQTLASQLVAAGQQYSQLRQSVNSQLTDTVTQINSYTSQIAQLNEQIASASSQGQPPNQLLDQRDLAVSKLSQLAGVQVVQSNGNYSVFLSGGQPLVVGNASYQLATVASPSDPSELTIVSKGVAGSAQPGPTQYLPDVSLTGGALGGLLAFRSQTLDPAQAQLGALAVSFASQVNAQNALGVDMSGNPGGSLFAVGAPAVYANQNNTGSATLSVSFVDGTQPTTSDYALSYDGAKYTLTDRATGSVVGTATPSSTPPTMTI…	667	BPSL0280
BKP2_00318	PGPTQYLPDVSLTGGALGG	BPSL0280	267	MSNTLMNLGVSGLNAALWGLTTTGQNISNAATPGYSVERPVYAEASGQYTSSGYLPQGVSTVTVERQYNQYLSNQLNAAQTQGSSLSTYYTLVAQLNNYVGSPTAGIATAITNYFTGLQTVANNAADPSARQTAMSNAQTLASQLVAAGQQYSQLRQSVNSQLTDTVTQINSYTSQIAQLNEQIASASSQGQPPNQLLDQRDLAVSKLSQLAGVQVVQSNGNYSVFLSGGQPLVVGNASYQLATVASPSDPSELTIVSKGVAGSAQPGPTQYLPDVSLTGGALGGLLAFRSQTLDPAQAQLGALAVSFASQVNAQNALGVDMSGNPGGSLFAVGAPAVYANQNNTGSATLSVSFVDGTQPTTSDYALSYDGAKYTLTDRATGSVVGTATPSSTPPTMTI…	667	BPSL0280
BKP2_00319	PTQYLPDVSLTGGALGGLL	BPSL0280	269	MSNTLMNLGVSGLNAALWGLTTTGQNISNAATPGYSVERPVYAEASGQYTSSGYLPQGVSTVTVERQYNQYLSNQLNAAQTQGSSLSTYYTLVAQLNNYVGSPTAGIATAITNYFTGLQTVANNAADPSARQTAMSNAQTLASQLVAAGQQYSQLRQSVNSQLTDTVTQINSYTSQIAQLNEQIASASSQGQPPNQLLDQRDLAVSKLSQLAGVQVVQSNGNYSVFLSGGQPLVVGNASYQLATVASPSDPSELTIVSKGVAGSAQPGPTQYLPDVSLTGGALGGLLAFRSQTLDPAQAQLGALAVSFASQVNAQNALGVDMSGNPGGSLFAVGAPAVYANQNNTGSATLSVSFVDGTQPTTSDYALSYDGAKYTLTDRATGSVVGTATPSSTPPTMTI…	667	BPSL0280
BKP2_00320	QYLPDVSLTGGALGGLLAF	BPSL0280	271	MSNTLMNLGVSGLNAALWGLTTTGQNISNAATPGYSVERPVYAEASGQYTSSGYLPQGVSTVTVERQYNQYLSNQLNAAQTQGSSLSTYYTLVAQLNNYVGSPTAGIATAITNYFTGLQTVANNAADPSARQTAMSNAQTLASQLVAAGQQYSQLRQSVNSQLTDTVTQINSYTSQIAQLNEQIASASSQGQPPNQLLDQRDLAVSKLSQLAGVQVVQSNGNYSVFLSGGQPLVVGNASYQLATVASPSDPSELTIVSKGVAGSAQPGPTQYLPDVSLTGGALGGLLAFRSQTLDPAQAQLGALAVSFASQVNAQNALGVDMSGNPGGSLFAVGAPAVYANQNNTGSATLSVSFVDGTQPTTSDYALSYDGAKYTLTDRATGSVVGTATPSSTPPTMTI…	667	BPSL0280
BKP2_00321	LPDVSLTGGALGGLLAFRS	BPSL0280	273	MSNTLMNLGVSGLNAALWGLTTTGQNISNAATPGYSVERPVYAEASGQYTSSGYLPQGVSTVTVERQYNQYLSNQLNAAQTQGSSLSTYYTLVAQLNNYVGSPTAGIATAITNYFTGLQTVANNAADPSARQTAMSNAQTLASQLVAAGQQYSQLRQSVNSQLTDTVTQINSYTSQIAQLNEQIASASSQGQPPNQLLDQRDLAVSKLSQLAGVQVVQSNGNYSVFLSGGQPLVVGNASYQLATVASPSDPSELTIVSKGVAGSAQPGPTQYLPDVSLTGGALGGLLAFRSQTLDPAQAQLGALAVSFASQVNAQNALGVDMSGNPGGSLFAVGAPAVYANQNNTGSATLSVSFVDGTQPTTSDYALSYDGAKYTLTDRATGSVVGTATPSSTPPTMTI…	667	BPSL0280
BKP2_00322	DVSLTGGALGGLLAFRSQT	BPSL0280	275	MSNTLMNLGVSGLNAALWGLTTTGQNISNAATPGYSVERPVYAEASGQYTSSGYLPQGVSTVTVERQYNQYLSNQLNAAQTQGSSLSTYYTLVAQLNNYVGSPTAGIATAITNYFTGLQTVANNAADPSARQTAMSNAQTLASQLVAAGQQYSQLRQSVNSQLTDTVTQINSYTSQIAQLNEQIASASSQGQPPNQLLDQRDLAVSKLSQLAGVQVVQSNGNYSVFLSGGQPLVVGNASYQLATVASPSDPSELTIVSKGVAGSAQPGPTQYLPDVSLTGGALGGLLAFRSQTLDPAQAQLGALAVSFASQVNAQNALGVDMSGNPGGSLFAVGAPAVYANQNNTGSATLSVSFVDGTQPTTSDYALSYDGAKYTLTDRATGSVVGTATPSSTPPTMTI…	667	BPSL0280
BKP2_00323	SLTGGALGGLLAFRSQTLD	BPSL0280	277	MSNTLMNLGVSGLNAALWGLTTTGQNISNAATPGYSVERPVYAEASGQYTSSGYLPQGVSTVTVERQYNQYLSNQLNAAQTQGSSLSTYYTLVAQLNNYVGSPTAGIATAITNYFTGLQTVANNAADPSARQTAMSNAQTLASQLVAAGQQYSQLRQSVNSQLTDTVTQINSYTSQIAQLNEQIASASSQGQPPNQLLDQRDLAVSKLSQLAGVQVVQSNGNYSVFLSGGQPLVVGNASYQLATVASPSDPSELTIVSKGVAGSAQPGPTQYLPDVSLTGGALGGLLAFRSQTLDPAQAQLGALAVSFASQVNAQNALGVDMSGNPGGSLFAVGAPAVYANQNNTGSATLSVSFVDGTQPTTSDYALSYDGAKYTLTDRATGSVVGTATPSSTPPTMTI…	667	BPSL0280
BKP2_00324	TGGALGGLLAFRSQTLDPA	BPSL0280	279	MSNTLMNLGVSGLNAALWGLTTTGQNISNAATPGYSVERPVYAEASGQYTSSGYLPQGVSTVTVERQYNQYLSNQLNAAQTQGSSLSTYYTLVAQLNNYVGSPTAGIATAITNYFTGLQTVANNAADPSARQTAMSNAQTLASQLVAAGQQYSQLRQSVNSQLTDTVTQINSYTSQIAQLNEQIASASSQGQPPNQLLDQRDLAVSKLSQLAGVQVVQSNGNYSVFLSGGQPLVVGNASYQLATVASPSDPSELTIVSKGVAGSAQPGPTQYLPDVSLTGGALGGLLAFRSQTLDPAQAQLGALAVSFASQVNAQNALGVDMSGNPGGSLFAVGAPAVYANQNNTGSATLSVSFVDGTQPTTSDYALSYDGAKYTLTDRATGSVVGTATPSSTPPTMTI…	667	BPSL0280
BKP2_00325	GALGGLLAFRSQTLDPAQA	BPSL0280	281	MSNTLMNLGVSGLNAALWGLTTTGQNISNAATPGYSVERPVYAEASGQYTSSGYLPQGVSTVTVERQYNQYLSNQLNAAQTQGSSLSTYYTLVAQLNNYVGSPTAGIATAITNYFTGLQTVANNAADPSARQTAMSNAQTLASQLVAAGQQYSQLRQSVNSQLTDTVTQINSYTSQIAQLNEQIASASSQGQPPNQLLDQRDLAVSKLSQLAGVQVVQSNGNYSVFLSGGQPLVVGNASYQLATVASPSDPSELTIVSKGVAGSAQPGPTQYLPDVSLTGGALGGLLAFRSQTLDPAQAQLGALAVSFASQVNAQNALGVDMSGNPGGSLFAVGAPAVYANQNNTGSATLSVSFVDGTQPTTSDYALSYDGAKYTLTDRATGSVVGTATPSSTPPTMTI…	667	BPSL0280
BKP2_00326	LGGLLAFRSQTLDPAQAQL	BPSL0280	283	MSNTLMNLGVSGLNAALWGLTTTGQNISNAATPGYSVERPVYAEASGQYTSSGYLPQGVSTVTVERQYNQYLSNQLNAAQTQGSSLSTYYTLVAQLNNYVGSPTAGIATAITNYFTGLQTVANNAADPSARQTAMSNAQTLASQLVAAGQQYSQLRQSVNSQLTDTVTQINSYTSQIAQLNEQIASASSQGQPPNQLLDQRDLAVSKLSQLAGVQVVQSNGNYSVFLSGGQPLVVGNASYQLATVASPSDPSELTIVSKGVAGSAQPGPTQYLPDVSLTGGALGGLLAFRSQTLDPAQAQLGALAVSFASQVNAQNALGVDMSGNPGGSLFAVGAPAVYANQNNTGSATLSVSFVDGTQPTTSDYALSYDGAKYTLTDRATGSVVGTATPSSTPPTMTI…	667	BPSL0280
BKP2_00327	GLLAFRSQTLDPAQAQLGA	BPSL0280	285	MSNTLMNLGVSGLNAALWGLTTTGQNISNAATPGYSVERPVYAEASGQYTSSGYLPQGVSTVTVERQYNQYLSNQLNAAQTQGSSLSTYYTLVAQLNNYVGSPTAGIATAITNYFTGLQTVANNAADPSARQTAMSNAQTLASQLVAAGQQYSQLRQSVNSQLTDTVTQINSYTSQIAQLNEQIASASSQGQPPNQLLDQRDLAVSKLSQLAGVQVVQSNGNYSVFLSGGQPLVVGNASYQLATVASPSDPSELTIVSKGVAGSAQPGPTQYLPDVSLTGGALGGLLAFRSQTLDPAQAQLGALAVSFASQVNAQNALGVDMSGNPGGSLFAVGAPAVYANQNNTGSATLSVSFVDGTQPTTSDYALSYDGAKYTLTDRATGSVVGTATPSSTPPTMTI…	667	BPSL0280
BKP2_00328	LAFRSQTLDPAQAQLGALA	BPSL0280	287	MSNTLMNLGVSGLNAALWGLTTTGQNISNAATPGYSVERPVYAEASGQYTSSGYLPQGVSTVTVERQYNQYLSNQLNAAQTQGSSLSTYYTLVAQLNNYVGSPTAGIATAITNYFTGLQTVANNAADPSARQTAMSNAQTLASQLVAAGQQYSQLRQSVNSQLTDTVTQINSYTSQIAQLNEQIASASSQGQPPNQLLDQRDLAVSKLSQLAGVQVVQSNGNYSVFLSGGQPLVVGNASYQLATVASPSDPSELTIVSKGVAGSAQPGPTQYLPDVSLTGGALGGLLAFRSQTLDPAQAQLGALAVSFASQVNAQNALGVDMSGNPGGSLFAVGAPAVYANQNNTGSATLSVSFVDGTQPTTSDYALSYDGAKYTLTDRATGSVVGTATPSSTPPTMTI…	667	BPSL0280
BKP2_00329	FRSQTLDPAQAQLGALAVS	BPSL0280	289	MSNTLMNLGVSGLNAALWGLTTTGQNISNAATPGYSVERPVYAEASGQYTSSGYLPQGVSTVTVERQYNQYLSNQLNAAQTQGSSLSTYYTLVAQLNNYVGSPTAGIATAITNYFTGLQTVANNAADPSARQTAMSNAQTLASQLVAAGQQYSQLRQSVNSQLTDTVTQINSYTSQIAQLNEQIASASSQGQPPNQLLDQRDLAVSKLSQLAGVQVVQSNGNYSVFLSGGQPLVVGNASYQLATVASPSDPSELTIVSKGVAGSAQPGPTQYLPDVSLTGGALGGLLAFRSQTLDPAQAQLGALAVSFASQVNAQNALGVDMSGNPGGSLFAVGAPAVYANQNNTGSATLSVSFVDGTQPTTSDYALSYDGAKYTLTDRATGSVVGTATPSSTPPTMTI…	667	BPSL0280
BKP2_00330	SQTLDPAQAQLGALAVSFA	BPSL0280	291	MSNTLMNLGVSGLNAALWGLTTTGQNISNAATPGYSVERPVYAEASGQYTSSGYLPQGVSTVTVERQYNQYLSNQLNAAQTQGSSLSTYYTLVAQLNNYVGSPTAGIATAITNYFTGLQTVANNAADPSARQTAMSNAQTLASQLVAAGQQYSQLRQSVNSQLTDTVTQINSYTSQIAQLNEQIASASSQGQPPNQLLDQRDLAVSKLSQLAGVQVVQSNGNYSVFLSGGQPLVVGNASYQLATVASPSDPSELTIVSKGVAGSAQPGPTQYLPDVSLTGGALGGLLAFRSQTLDPAQAQLGALAVSFASQVNAQNALGVDMSGNPGGSLFAVGAPAVYANQNNTGSATLSVSFVDGTQPTTSDYALSYDGAKYTLTDRATGSVVGTATPSSTPPTMTI…	667	BPSL0280
BKP2_00331	TLDPAQAQLGALAVSFASQ	BPSL0280	293	MSNTLMNLGVSGLNAALWGLTTTGQNISNAATPGYSVERPVYAEASGQYTSSGYLPQGVSTVTVERQYNQYLSNQLNAAQTQGSSLSTYYTLVAQLNNYVGSPTAGIATAITNYFTGLQTVANNAADPSARQTAMSNAQTLASQLVAAGQQYSQLRQSVNSQLTDTVTQINSYTSQIAQLNEQIASASSQGQPPNQLLDQRDLAVSKLSQLAGVQVVQSNGNYSVFLSGGQPLVVGNASYQLATVASPSDPSELTIVSKGVAGSAQPGPTQYLPDVSLTGGALGGLLAFRSQTLDPAQAQLGALAVSFASQVNAQNALGVDMSGNPGGSLFAVGAPAVYANQNNTGSATLSVSFVDGTQPTTSDYALSYDGAKYTLTDRATGSVVGTATPSSTPPTMTI…	667	BPSL0280
BKP2_00332	DPAQAQLGALAVSFASQVN	BPSL0280	295	MSNTLMNLGVSGLNAALWGLTTTGQNISNAATPGYSVERPVYAEASGQYTSSGYLPQGVSTVTVERQYNQYLSNQLNAAQTQGSSLSTYYTLVAQLNNYVGSPTAGIATAITNYFTGLQTVANNAADPSARQTAMSNAQTLASQLVAAGQQYSQLRQSVNSQLTDTVTQINSYTSQIAQLNEQIASASSQGQPPNQLLDQRDLAVSKLSQLAGVQVVQSNGNYSVFLSGGQPLVVGNASYQLATVASPSDPSELTIVSKGVAGSAQPGPTQYLPDVSLTGGALGGLLAFRSQTLDPAQAQLGALAVSFASQVNAQNALGVDMSGNPGGSLFAVGAPAVYANQNNTGSATLSVSFVDGTQPTTSDYALSYDGAKYTLTDRATGSVVGTATPSSTPPTMTI…	667	BPSL0280
BKP2_00333	AQAQLGALAVSFASQVNAQ	BPSL0280	297	MSNTLMNLGVSGLNAALWGLTTTGQNISNAATPGYSVERPVYAEASGQYTSSGYLPQGVSTVTVERQYNQYLSNQLNAAQTQGSSLSTYYTLVAQLNNYVGSPTAGIATAITNYFTGLQTVANNAADPSARQTAMSNAQTLASQLVAAGQQYSQLRQSVNSQLTDTVTQINSYTSQIAQLNEQIASASSQGQPPNQLLDQRDLAVSKLSQLAGVQVVQSNGNYSVFLSGGQPLVVGNASYQLATVASPSDPSELTIVSKGVAGSAQPGPTQYLPDVSLTGGALGGLLAFRSQTLDPAQAQLGALAVSFASQVNAQNALGVDMSGNPGGSLFAVGAPAVYANQNNTGSATLSVSFVDGTQPTTSDYALSYDGAKYTLTDRATGSVVGTATPSSTPPTMTI…	667	BPSL0280
BKP2_00334	AQLGALAVSFASQVNAQNA	BPSL0280	299	MSNTLMNLGVSGLNAALWGLTTTGQNISNAATPGYSVERPVYAEASGQYTSSGYLPQGVSTVTVERQYNQYLSNQLNAAQTQGSSLSTYYTLVAQLNNYVGSPTAGIATAITNYFTGLQTVANNAADPSARQTAMSNAQTLASQLVAAGQQYSQLRQSVNSQLTDTVTQINSYTSQIAQLNEQIASASSQGQPPNQLLDQRDLAVSKLSQLAGVQVVQSNGNYSVFLSGGQPLVVGNASYQLATVASPSDPSELTIVSKGVAGSAQPGPTQYLPDVSLTGGALGGLLAFRSQTLDPAQAQLGALAVSFASQVNAQNALGVDMSGNPGGSLFAVGAPAVYANQNNTGSATLSVSFVDGTQPTTSDYALSYDGAKYTLTDRATGSVVGTATPSSTPPTMTI…	667	BPSL0280
BKP2_00335	LGALAVSFASQVNAQNALG	BPSL0280	301	MSNTLMNLGVSGLNAALWGLTTTGQNISNAATPGYSVERPVYAEASGQYTSSGYLPQGVSTVTVERQYNQYLSNQLNAAQTQGSSLSTYYTLVAQLNNYVGSPTAGIATAITNYFTGLQTVANNAADPSARQTAMSNAQTLASQLVAAGQQYSQLRQSVNSQLTDTVTQINSYTSQIAQLNEQIASASSQGQPPNQLLDQRDLAVSKLSQLAGVQVVQSNGNYSVFLSGGQPLVVGNASYQLATVASPSDPSELTIVSKGVAGSAQPGPTQYLPDVSLTGGALGGLLAFRSQTLDPAQAQLGALAVSFASQVNAQNALGVDMSGNPGGSLFAVGAPAVYANQNNTGSATLSVSFVDGTQPTTSDYALSYDGAKYTLTDRATGSVVGTATPSSTPPTMTI…	667	BPSL0280
BKP2_00336	ALAVSFASQVNAQNALGVD	BPSL0280	303	MSNTLMNLGVSGLNAALWGLTTTGQNISNAATPGYSVERPVYAEASGQYTSSGYLPQGVSTVTVERQYNQYLSNQLNAAQTQGSSLSTYYTLVAQLNNYVGSPTAGIATAITNYFTGLQTVANNAADPSARQTAMSNAQTLASQLVAAGQQYSQLRQSVNSQLTDTVTQINSYTSQIAQLNEQIASASSQGQPPNQLLDQRDLAVSKLSQLAGVQVVQSNGNYSVFLSGGQPLVVGNASYQLATVASPSDPSELTIVSKGVAGSAQPGPTQYLPDVSLTGGALGGLLAFRSQTLDPAQAQLGALAVSFASQVNAQNALGVDMSGNPGGSLFAVGAPAVYANQNNTGSATLSVSFVDGTQPTTSDYALSYDGAKYTLTDRATGSVVGTATPSSTPPTMTI…	667	BPSL0280
BKP2_00337	AVSFASQVNAQNALGVDMS	BPSL0280	305	MSNTLMNLGVSGLNAALWGLTTTGQNISNAATPGYSVERPVYAEASGQYTSSGYLPQGVSTVTVERQYNQYLSNQLNAAQTQGSSLSTYYTLVAQLNNYVGSPTAGIATAITNYFTGLQTVANNAADPSARQTAMSNAQTLASQLVAAGQQYSQLRQSVNSQLTDTVTQINSYTSQIAQLNEQIASASSQGQPPNQLLDQRDLAVSKLSQLAGVQVVQSNGNYSVFLSGGQPLVVGNASYQLATVASPSDPSELTIVSKGVAGSAQPGPTQYLPDVSLTGGALGGLLAFRSQTLDPAQAQLGALAVSFASQVNAQNALGVDMSGNPGGSLFAVGAPAVYANQNNTGSATLSVSFVDGTQPTTSDYALSYDGAKYTLTDRATGSVVGTATPSSTPPTMTI…	667	BPSL0280
BKP2_00338	SFASQVNAQNALGVDMSGN	BPSL0280	307	MSNTLMNLGVSGLNAALWGLTTTGQNISNAATPGYSVERPVYAEASGQYTSSGYLPQGVSTVTVERQYNQYLSNQLNAAQTQGSSLSTYYTLVAQLNNYVGSPTAGIATAITNYFTGLQTVANNAADPSARQTAMSNAQTLASQLVAAGQQYSQLRQSVNSQLTDTVTQINSYTSQIAQLNEQIASASSQGQPPNQLLDQRDLAVSKLSQLAGVQVVQSNGNYSVFLSGGQPLVVGNASYQLATVASPSDPSELTIVSKGVAGSAQPGPTQYLPDVSLTGGALGGLLAFRSQTLDPAQAQLGALAVSFASQVNAQNALGVDMSGNPGGSLFAVGAPAVYANQNNTGSATLSVSFVDGTQPTTSDYALSYDGAKYTLTDRATGSVVGTATPSSTPPTMTI…	667	BPSL0280
BKP2_00339	ASQVNAQNALGVDMSGNPG	BPSL0280	309	MSNTLMNLGVSGLNAALWGLTTTGQNISNAATPGYSVERPVYAEASGQYTSSGYLPQGVSTVTVERQYNQYLSNQLNAAQTQGSSLSTYYTLVAQLNNYVGSPTAGIATAITNYFTGLQTVANNAADPSARQTAMSNAQTLASQLVAAGQQYSQLRQSVNSQLTDTVTQINSYTSQIAQLNEQIASASSQGQPPNQLLDQRDLAVSKLSQLAGVQVVQSNGNYSVFLSGGQPLVVGNASYQLATVASPSDPSELTIVSKGVAGSAQPGPTQYLPDVSLTGGALGGLLAFRSQTLDPAQAQLGALAVSFASQVNAQNALGVDMSGNPGGSLFAVGAPAVYANQNNTGSATLSVSFVDGTQPTTSDYALSYDGAKYTLTDRATGSVVGTATPSSTPPTMTI…	667	BPSL0280
BKP2_00340	QVNAQNALGVDMSGNPGGS	BPSL0280	311	MSNTLMNLGVSGLNAALWGLTTTGQNISNAATPGYSVERPVYAEASGQYTSSGYLPQGVSTVTVERQYNQYLSNQLNAAQTQGSSLSTYYTLVAQLNNYVGSPTAGIATAITNYFTGLQTVANNAADPSARQTAMSNAQTLASQLVAAGQQYSQLRQSVNSQLTDTVTQINSYTSQIAQLNEQIASASSQGQPPNQLLDQRDLAVSKLSQLAGVQVVQSNGNYSVFLSGGQPLVVGNASYQLATVASPSDPSELTIVSKGVAGSAQPGPTQYLPDVSLTGGALGGLLAFRSQTLDPAQAQLGALAVSFASQVNAQNALGVDMSGNPGGSLFAVGAPAVYANQNNTGSATLSVSFVDGTQPTTSDYALSYDGAKYTLTDRATGSVVGTATPSSTPPTMTI…	667	BPSL0280
BKP2_00341	NAQNALGVDMSGNPGGSLF	BPSL0280	313	MSNTLMNLGVSGLNAALWGLTTTGQNISNAATPGYSVERPVYAEASGQYTSSGYLPQGVSTVTVERQYNQYLSNQLNAAQTQGSSLSTYYTLVAQLNNYVGSPTAGIATAITNYFTGLQTVANNAADPSARQTAMSNAQTLASQLVAAGQQYSQLRQSVNSQLTDTVTQINSYTSQIAQLNEQIASASSQGQPPNQLLDQRDLAVSKLSQLAGVQVVQSNGNYSVFLSGGQPLVVGNASYQLATVASPSDPSELTIVSKGVAGSAQPGPTQYLPDVSLTGGALGGLLAFRSQTLDPAQAQLGALAVSFASQVNAQNALGVDMSGNPGGSLFAVGAPAVYANQNNTGSATLSVSFVDGTQPTTSDYALSYDGAKYTLTDRATGSVVGTATPSSTPPTMTI…	667	BPSL0280
BKP2_00342	QNALGVDMSGNPGGSLFAV	BPSL0280	315	MSNTLMNLGVSGLNAALWGLTTTGQNISNAATPGYSVERPVYAEASGQYTSSGYLPQGVSTVTVERQYNQYLSNQLNAAQTQGSSLSTYYTLVAQLNNYVGSPTAGIATAITNYFTGLQTVANNAADPSARQTAMSNAQTLASQLVAAGQQYSQLRQSVNSQLTDTVTQINSYTSQIAQLNEQIASASSQGQPPNQLLDQRDLAVSKLSQLAGVQVVQSNGNYSVFLSGGQPLVVGNASYQLATVASPSDPSELTIVSKGVAGSAQPGPTQYLPDVSLTGGALGGLLAFRSQTLDPAQAQLGALAVSFASQVNAQNALGVDMSGNPGGSLFAVGAPAVYANQNNTGSATLSVSFVDGTQPTTSDYALSYDGAKYTLTDRATGSVVGTATPSSTPPTMTI…	667	BPSL0280
BKP2_00343	ALGVDMSGNPGGSLFAVGA	BPSL0280	317	MSNTLMNLGVSGLNAALWGLTTTGQNISNAATPGYSVERPVYAEASGQYTSSGYLPQGVSTVTVERQYNQYLSNQLNAAQTQGSSLSTYYTLVAQLNNYVGSPTAGIATAITNYFTGLQTVANNAADPSARQTAMSNAQTLASQLVAAGQQYSQLRQSVNSQLTDTVTQINSYTSQIAQLNEQIASASSQGQPPNQLLDQRDLAVSKLSQLAGVQVVQSNGNYSVFLSGGQPLVVGNASYQLATVASPSDPSELTIVSKGVAGSAQPGPTQYLPDVSLTGGALGGLLAFRSQTLDPAQAQLGALAVSFASQVNAQNALGVDMSGNPGGSLFAVGAPAVYANQNNTGSATLSVSFVDGTQPTTSDYALSYDGAKYTLTDRATGSVVGTATPSSTPPTMTI…	667	BPSL0280
BKP2_00344	GVDMSGNPGGSLFAVGAPA	BPSL0280	319	MSNTLMNLGVSGLNAALWGLTTTGQNISNAATPGYSVERPVYAEASGQYTSSGYLPQGVSTVTVERQYNQYLSNQLNAAQTQGSSLSTYYTLVAQLNNYVGSPTAGIATAITNYFTGLQTVANNAADPSARQTAMSNAQTLASQLVAAGQQYSQLRQSVNSQLTDTVTQINSYTSQIAQLNEQIASASSQGQPPNQLLDQRDLAVSKLSQLAGVQVVQSNGNYSVFLSGGQPLVVGNASYQLATVASPSDPSELTIVSKGVAGSAQPGPTQYLPDVSLTGGALGGLLAFRSQTLDPAQAQLGALAVSFASQVNAQNALGVDMSGNPGGSLFAVGAPAVYANQNNTGSATLSVSFVDGTQPTTSDYALSYDGAKYTLTDRATGSVVGTATPSSTPPTMTI…	667	BPSL0280
BKP2_00345	DMSGNPGGSLFAVGAPAVY	BPSL0280	321	MSNTLMNLGVSGLNAALWGLTTTGQNISNAATPGYSVERPVYAEASGQYTSSGYLPQGVSTVTVERQYNQYLSNQLNAAQTQGSSLSTYYTLVAQLNNYVGSPTAGIATAITNYFTGLQTVANNAADPSARQTAMSNAQTLASQLVAAGQQYSQLRQSVNSQLTDTVTQINSYTSQIAQLNEQIASASSQGQPPNQLLDQRDLAVSKLSQLAGVQVVQSNGNYSVFLSGGQPLVVGNASYQLATVASPSDPSELTIVSKGVAGSAQPGPTQYLPDVSLTGGALGGLLAFRSQTLDPAQAQLGALAVSFASQVNAQNALGVDMSGNPGGSLFAVGAPAVYANQNNTGSATLSVSFVDGTQPTTSDYALSYDGAKYTLTDRATGSVVGTATPSSTPPTMTI…	667	BPSL0280
BKP2_00346	SGNPGGSLFAVGAPAVYAN	BPSL0280	323	MSNTLMNLGVSGLNAALWGLTTTGQNISNAATPGYSVERPVYAEASGQYTSSGYLPQGVSTVTVERQYNQYLSNQLNAAQTQGSSLSTYYTLVAQLNNYVGSPTAGIATAITNYFTGLQTVANNAADPSARQTAMSNAQTLASQLVAAGQQYSQLRQSVNSQLTDTVTQINSYTSQIAQLNEQIASASSQGQPPNQLLDQRDLAVSKLSQLAGVQVVQSNGNYSVFLSGGQPLVVGNASYQLATVASPSDPSELTIVSKGVAGSAQPGPTQYLPDVSLTGGALGGLLAFRSQTLDPAQAQLGALAVSFASQVNAQNALGVDMSGNPGGSLFAVGAPAVYANQNNTGSATLSVSFVDGTQPTTSDYALSYDGAKYTLTDRATGSVVGTATPSSTPPTMTI…	667	BPSL0280
BKP2_00347	NPGGSLFAVGAPAVYANQN	BPSL0280	325	MSNTLMNLGVSGLNAALWGLTTTGQNISNAATPGYSVERPVYAEASGQYTSSGYLPQGVSTVTVERQYNQYLSNQLNAAQTQGSSLSTYYTLVAQLNNYVGSPTAGIATAITNYFTGLQTVANNAADPSARQTAMSNAQTLASQLVAAGQQYSQLRQSVNSQLTDTVTQINSYTSQIAQLNEQIASASSQGQPPNQLLDQRDLAVSKLSQLAGVQVVQSNGNYSVFLSGGQPLVVGNASYQLATVASPSDPSELTIVSKGVAGSAQPGPTQYLPDVSLTGGALGGLLAFRSQTLDPAQAQLGALAVSFASQVNAQNALGVDMSGNPGGSLFAVGAPAVYANQNNTGSATLSVSFVDGTQPTTSDYALSYDGAKYTLTDRATGSVVGTATPSSTPPTMTI…	667	BPSL0280
BKP2_00348	GGSLFAVGAPAVYANQNNT	BPSL0280	327	MSNTLMNLGVSGLNAALWGLTTTGQNISNAATPGYSVERPVYAEASGQYTSSGYLPQGVSTVTVERQYNQYLSNQLNAAQTQGSSLSTYYTLVAQLNNYVGSPTAGIATAITNYFTGLQTVANNAADPSARQTAMSNAQTLASQLVAAGQQYSQLRQSVNSQLTDTVTQINSYTSQIAQLNEQIASASSQGQPPNQLLDQRDLAVSKLSQLAGVQVVQSNGNYSVFLSGGQPLVVGNASYQLATVASPSDPSELTIVSKGVAGSAQPGPTQYLPDVSLTGGALGGLLAFRSQTLDPAQAQLGALAVSFASQVNAQNALGVDMSGNPGGSLFAVGAPAVYANQNNTGSATLSVSFVDGTQPTTSDYALSYDGAKYTLTDRATGSVVGTATPSSTPPTMTI…	667	BPSL0280
BKP2_00349	SLFAVGAPAVYANQNNTGS	BPSL0280	329	MSNTLMNLGVSGLNAALWGLTTTGQNISNAATPGYSVERPVYAEASGQYTSSGYLPQGVSTVTVERQYNQYLSNQLNAAQTQGSSLSTYYTLVAQLNNYVGSPTAGIATAITNYFTGLQTVANNAADPSARQTAMSNAQTLASQLVAAGQQYSQLRQSVNSQLTDTVTQINSYTSQIAQLNEQIASASSQGQPPNQLLDQRDLAVSKLSQLAGVQVVQSNGNYSVFLSGGQPLVVGNASYQLATVASPSDPSELTIVSKGVAGSAQPGPTQYLPDVSLTGGALGGLLAFRSQTLDPAQAQLGALAVSFASQVNAQNALGVDMSGNPGGSLFAVGAPAVYANQNNTGSATLSVSFVDGTQPTTSDYALSYDGAKYTLTDRATGSVVGTATPSSTPPTMTI…	667	BPSL0280
BKP2_00350	FAVGAPAVYANQNNTGSAT	BPSL0280	331	MSNTLMNLGVSGLNAALWGLTTTGQNISNAATPGYSVERPVYAEASGQYTSSGYLPQGVSTVTVERQYNQYLSNQLNAAQTQGSSLSTYYTLVAQLNNYVGSPTAGIATAITNYFTGLQTVANNAADPSARQTAMSNAQTLASQLVAAGQQYSQLRQSVNSQLTDTVTQINSYTSQIAQLNEQIASASSQGQPPNQLLDQRDLAVSKLSQLAGVQVVQSNGNYSVFLSGGQPLVVGNASYQLATVASPSDPSELTIVSKGVAGSAQPGPTQYLPDVSLTGGALGGLLAFRSQTLDPAQAQLGALAVSFASQVNAQNALGVDMSGNPGGSLFAVGAPAVYANQNNTGSATLSVSFVDGTQPTTSDYALSYDGAKYTLTDRATGSVVGTATPSSTPPTMTI…	667	BPSL0280
BKP2_00351	VGAPAVYANQNNTGSATLS	BPSL0280	333	MSNTLMNLGVSGLNAALWGLTTTGQNISNAATPGYSVERPVYAEASGQYTSSGYLPQGVSTVTVERQYNQYLSNQLNAAQTQGSSLSTYYTLVAQLNNYVGSPTAGIATAITNYFTGLQTVANNAADPSARQTAMSNAQTLASQLVAAGQQYSQLRQSVNSQLTDTVTQINSYTSQIAQLNEQIASASSQGQPPNQLLDQRDLAVSKLSQLAGVQVVQSNGNYSVFLSGGQPLVVGNASYQLATVASPSDPSELTIVSKGVAGSAQPGPTQYLPDVSLTGGALGGLLAFRSQTLDPAQAQLGALAVSFASQVNAQNALGVDMSGNPGGSLFAVGAPAVYANQNNTGSATLSVSFVDGTQPTTSDYALSYDGAKYTLTDRATGSVVGTATPSSTPPTMTI…	667	BPSL0280
BKP2_00352	APAVYANQNNTGSATLSVS	BPSL0280	335	MSNTLMNLGVSGLNAALWGLTTTGQNISNAATPGYSVERPVYAEASGQYTSSGYLPQGVSTVTVERQYNQYLSNQLNAAQTQGSSLSTYYTLVAQLNNYVGSPTAGIATAITNYFTGLQTVANNAADPSARQTAMSNAQTLASQLVAAGQQYSQLRQSVNSQLTDTVTQINSYTSQIAQLNEQIASASSQGQPPNQLLDQRDLAVSKLSQLAGVQVVQSNGNYSVFLSGGQPLVVGNASYQLATVASPSDPSELTIVSKGVAGSAQPGPTQYLPDVSLTGGALGGLLAFRSQTLDPAQAQLGALAVSFASQVNAQNALGVDMSGNPGGSLFAVGAPAVYANQNNTGSATLSVSFVDGTQPTTSDYALSYDGAKYTLTDRATGSVVGTATPSSTPPTMTI…	667	BPSL0280
BKP2_00353	AVYANQNNTGSATLSVSFV	BPSL0280	337	MSNTLMNLGVSGLNAALWGLTTTGQNISNAATPGYSVERPVYAEASGQYTSSGYLPQGVSTVTVERQYNQYLSNQLNAAQTQGSSLSTYYTLVAQLNNYVGSPTAGIATAITNYFTGLQTVANNAADPSARQTAMSNAQTLASQLVAAGQQYSQLRQSVNSQLTDTVTQINSYTSQIAQLNEQIASASSQGQPPNQLLDQRDLAVSKLSQLAGVQVVQSNGNYSVFLSGGQPLVVGNASYQLATVASPSDPSELTIVSKGVAGSAQPGPTQYLPDVSLTGGALGGLLAFRSQTLDPAQAQLGALAVSFASQVNAQNALGVDMSGNPGGSLFAVGAPAVYANQNNTGSATLSVSFVDGTQPTTSDYALSYDGAKYTLTDRATGSVVGTATPSSTPPTMTI…	667	BPSL0280
BKP2_00354	YANQNNTGSATLSVSFVDG	BPSL0280	339	MSNTLMNLGVSGLNAALWGLTTTGQNISNAATPGYSVERPVYAEASGQYTSSGYLPQGVSTVTVERQYNQYLSNQLNAAQTQGSSLSTYYTLVAQLNNYVGSPTAGIATAITNYFTGLQTVANNAADPSARQTAMSNAQTLASQLVAAGQQYSQLRQSVNSQLTDTVTQINSYTSQIAQLNEQIASASSQGQPPNQLLDQRDLAVSKLSQLAGVQVVQSNGNYSVFLSGGQPLVVGNASYQLATVASPSDPSELTIVSKGVAGSAQPGPTQYLPDVSLTGGALGGLLAFRSQTLDPAQAQLGALAVSFASQVNAQNALGVDMSGNPGGSLFAVGAPAVYANQNNTGSATLSVSFVDGTQPTTSDYALSYDGAKYTLTDRATGSVVGTATPSSTPPTMTI…	667	BPSL0280
BKP2_00355	NQNNTGSATLSVSFVDGTQ	BPSL0280	341	MSNTLMNLGVSGLNAALWGLTTTGQNISNAATPGYSVERPVYAEASGQYTSSGYLPQGVSTVTVERQYNQYLSNQLNAAQTQGSSLSTYYTLVAQLNNYVGSPTAGIATAITNYFTGLQTVANNAADPSARQTAMSNAQTLASQLVAAGQQYSQLRQSVNSQLTDTVTQINSYTSQIAQLNEQIASASSQGQPPNQLLDQRDLAVSKLSQLAGVQVVQSNGNYSVFLSGGQPLVVGNASYQLATVASPSDPSELTIVSKGVAGSAQPGPTQYLPDVSLTGGALGGLLAFRSQTLDPAQAQLGALAVSFASQVNAQNALGVDMSGNPGGSLFAVGAPAVYANQNNTGSATLSVSFVDGTQPTTSDYALSYDGAKYTLTDRATGSVVGTATPSSTPPTMTI…	667	BPSL0280
BKP2_00356	NNTGSATLSVSFVDGTQPT	BPSL0280	343	MSNTLMNLGVSGLNAALWGLTTTGQNISNAATPGYSVERPVYAEASGQYTSSGYLPQGVSTVTVERQYNQYLSNQLNAAQTQGSSLSTYYTLVAQLNNYVGSPTAGIATAITNYFTGLQTVANNAADPSARQTAMSNAQTLASQLVAAGQQYSQLRQSVNSQLTDTVTQINSYTSQIAQLNEQIASASSQGQPPNQLLDQRDLAVSKLSQLAGVQVVQSNGNYSVFLSGGQPLVVGNASYQLATVASPSDPSELTIVSKGVAGSAQPGPTQYLPDVSLTGGALGGLLAFRSQTLDPAQAQLGALAVSFASQVNAQNALGVDMSGNPGGSLFAVGAPAVYANQNNTGSATLSVSFVDGTQPTTSDYALSYDGAKYTLTDRATGSVVGTATPSSTPPTMTI…	667	BPSL0280
BKP2_00357	TGSATLSVSFVDGTQPTTS	BPSL0280	345	MSNTLMNLGVSGLNAALWGLTTTGQNISNAATPGYSVERPVYAEASGQYTSSGYLPQGVSTVTVERQYNQYLSNQLNAAQTQGSSLSTYYTLVAQLNNYVGSPTAGIATAITNYFTGLQTVANNAADPSARQTAMSNAQTLASQLVAAGQQYSQLRQSVNSQLTDTVTQINSYTSQIAQLNEQIASASSQGQPPNQLLDQRDLAVSKLSQLAGVQVVQSNGNYSVFLSGGQPLVVGNASYQLATVASPSDPSELTIVSKGVAGSAQPGPTQYLPDVSLTGGALGGLLAFRSQTLDPAQAQLGALAVSFASQVNAQNALGVDMSGNPGGSLFAVGAPAVYANQNNTGSATLSVSFVDGTQPTTSDYALSYDGAKYTLTDRATGSVVGTATPSSTPPTMTI…	667	BPSL0280
BKP2_00358	SATLSVSFVDGTQPTTSDY	BPSL0280	347	MSNTLMNLGVSGLNAALWGLTTTGQNISNAATPGYSVERPVYAEASGQYTSSGYLPQGVSTVTVERQYNQYLSNQLNAAQTQGSSLSTYYTLVAQLNNYVGSPTAGIATAITNYFTGLQTVANNAADPSARQTAMSNAQTLASQLVAAGQQYSQLRQSVNSQLTDTVTQINSYTSQIAQLNEQIASASSQGQPPNQLLDQRDLAVSKLSQLAGVQVVQSNGNYSVFLSGGQPLVVGNASYQLATVASPSDPSELTIVSKGVAGSAQPGPTQYLPDVSLTGGALGGLLAFRSQTLDPAQAQLGALAVSFASQVNAQNALGVDMSGNPGGSLFAVGAPAVYANQNNTGSATLSVSFVDGTQPTTSDYALSYDGAKYTLTDRATGSVVGTATPSSTPPTMTI…	667	BPSL0280
BKP2_00359	TLSVSFVDGTQPTTSDYAL	BPSL0280	349	MSNTLMNLGVSGLNAALWGLTTTGQNISNAATPGYSVERPVYAEASGQYTSSGYLPQGVSTVTVERQYNQYLSNQLNAAQTQGSSLSTYYTLVAQLNNYVGSPTAGIATAITNYFTGLQTVANNAADPSARQTAMSNAQTLASQLVAAGQQYSQLRQSVNSQLTDTVTQINSYTSQIAQLNEQIASASSQGQPPNQLLDQRDLAVSKLSQLAGVQVVQSNGNYSVFLSGGQPLVVGNASYQLATVASPSDPSELTIVSKGVAGSAQPGPTQYLPDVSLTGGALGGLLAFRSQTLDPAQAQLGALAVSFASQVNAQNALGVDMSGNPGGSLFAVGAPAVYANQNNTGSATLSVSFVDGTQPTTSDYALSYDGAKYTLTDRATGSVVGTATPSSTPPTMTI…	667	BPSL0280
BKP2_00360	SVSFVDGTQPTTSDYALSY	BPSL0280	351	MSNTLMNLGVSGLNAALWGLTTTGQNISNAATPGYSVERPVYAEASGQYTSSGYLPQGVSTVTVERQYNQYLSNQLNAAQTQGSSLSTYYTLVAQLNNYVGSPTAGIATAITNYFTGLQTVANNAADPSARQTAMSNAQTLASQLVAAGQQYSQLRQSVNSQLTDTVTQINSYTSQIAQLNEQIASASSQGQPPNQLLDQRDLAVSKLSQLAGVQVVQSNGNYSVFLSGGQPLVVGNASYQLATVASPSDPSELTIVSKGVAGSAQPGPTQYLPDVSLTGGALGGLLAFRSQTLDPAQAQLGALAVSFASQVNAQNALGVDMSGNPGGSLFAVGAPAVYANQNNTGSATLSVSFVDGTQPTTSDYALSYDGAKYTLTDRATGSVVGTATPSSTPPTMTI…	667	BPSL0280
BKP2_00361	SFVDGTQPTTSDYALSYDG	BPSL0280	353	MSNTLMNLGVSGLNAALWGLTTTGQNISNAATPGYSVERPVYAEASGQYTSSGYLPQGVSTVTVERQYNQYLSNQLNAAQTQGSSLSTYYTLVAQLNNYVGSPTAGIATAITNYFTGLQTVANNAADPSARQTAMSNAQTLASQLVAAGQQYSQLRQSVNSQLTDTVTQINSYTSQIAQLNEQIASASSQGQPPNQLLDQRDLAVSKLSQLAGVQVVQSNGNYSVFLSGGQPLVVGNASYQLATVASPSDPSELTIVSKGVAGSAQPGPTQYLPDVSLTGGALGGLLAFRSQTLDPAQAQLGALAVSFASQVNAQNALGVDMSGNPGGSLFAVGAPAVYANQNNTGSATLSVSFVDGTQPTTSDYALSYDGAKYTLTDRATGSVVGTATPSSTPPTMTI…	667	BPSL0280
BKP2_00362	VDGTQPTTSDYALSYDGAK	BPSL0280	355	MSNTLMNLGVSGLNAALWGLTTTGQNISNAATPGYSVERPVYAEASGQYTSSGYLPQGVSTVTVERQYNQYLSNQLNAAQTQGSSLSTYYTLVAQLNNYVGSPTAGIATAITNYFTGLQTVANNAADPSARQTAMSNAQTLASQLVAAGQQYSQLRQSVNSQLTDTVTQINSYTSQIAQLNEQIASASSQGQPPNQLLDQRDLAVSKLSQLAGVQVVQSNGNYSVFLSGGQPLVVGNASYQLATVASPSDPSELTIVSKGVAGSAQPGPTQYLPDVSLTGGALGGLLAFRSQTLDPAQAQLGALAVSFASQVNAQNALGVDMSGNPGGSLFAVGAPAVYANQNNTGSATLSVSFVDGTQPTTSDYALSYDGAKYTLTDRATGSVVGTATPSSTPPTMTI…	667	BPSL0280
BKP2_00363	GTQPTTSDYALSYDGAKYT	BPSL0280	357	MSNTLMNLGVSGLNAALWGLTTTGQNISNAATPGYSVERPVYAEASGQYTSSGYLPQGVSTVTVERQYNQYLSNQLNAAQTQGSSLSTYYTLVAQLNNYVGSPTAGIATAITNYFTGLQTVANNAADPSARQTAMSNAQTLASQLVAAGQQYSQLRQSVNSQLTDTVTQINSYTSQIAQLNEQIASASSQGQPPNQLLDQRDLAVSKLSQLAGVQVVQSNGNYSVFLSGGQPLVVGNASYQLATVASPSDPSELTIVSKGVAGSAQPGPTQYLPDVSLTGGALGGLLAFRSQTLDPAQAQLGALAVSFASQVNAQNALGVDMSGNPGGSLFAVGAPAVYANQNNTGSATLSVSFVDGTQPTTSDYALSYDGAKYTLTDRATGSVVGTATPSSTPPTMTI…	667	BPSL0280
BKP2_00364	QPTTSDYALSYDGAKYTLT	BPSL0280	359	MSNTLMNLGVSGLNAALWGLTTTGQNISNAATPGYSVERPVYAEASGQYTSSGYLPQGVSTVTVERQYNQYLSNQLNAAQTQGSSLSTYYTLVAQLNNYVGSPTAGIATAITNYFTGLQTVANNAADPSARQTAMSNAQTLASQLVAAGQQYSQLRQSVNSQLTDTVTQINSYTSQIAQLNEQIASASSQGQPPNQLLDQRDLAVSKLSQLAGVQVVQSNGNYSVFLSGGQPLVVGNASYQLATVASPSDPSELTIVSKGVAGSAQPGPTQYLPDVSLTGGALGGLLAFRSQTLDPAQAQLGALAVSFASQVNAQNALGVDMSGNPGGSLFAVGAPAVYANQNNTGSATLSVSFVDGTQPTTSDYALSYDGAKYTLTDRATGSVVGTATPSSTPPTMTI…	667	BPSL0280
BKP2_00365	TTSDYALSYDGAKYTLTDR	BPSL0280	361	MSNTLMNLGVSGLNAALWGLTTTGQNISNAATPGYSVERPVYAEASGQYTSSGYLPQGVSTVTVERQYNQYLSNQLNAAQTQGSSLSTYYTLVAQLNNYVGSPTAGIATAITNYFTGLQTVANNAADPSARQTAMSNAQTLASQLVAAGQQYSQLRQSVNSQLTDTVTQINSYTSQIAQLNEQIASASSQGQPPNQLLDQRDLAVSKLSQLAGVQVVQSNGNYSVFLSGGQPLVVGNASYQLATVASPSDPSELTIVSKGVAGSAQPGPTQYLPDVSLTGGALGGLLAFRSQTLDPAQAQLGALAVSFASQVNAQNALGVDMSGNPGGSLFAVGAPAVYANQNNTGSATLSVSFVDGTQPTTSDYALSYDGAKYTLTDRATGSVVGTATPSSTPPTMTI…	667	BPSL0280
BKP2_00366	SDYALSYDGAKYTLTDRAT	BPSL0280	363	MSNTLMNLGVSGLNAALWGLTTTGQNISNAATPGYSVERPVYAEASGQYTSSGYLPQGVSTVTVERQYNQYLSNQLNAAQTQGSSLSTYYTLVAQLNNYVGSPTAGIATAITNYFTGLQTVANNAADPSARQTAMSNAQTLASQLVAAGQQYSQLRQSVNSQLTDTVTQINSYTSQIAQLNEQIASASSQGQPPNQLLDQRDLAVSKLSQLAGVQVVQSNGNYSVFLSGGQPLVVGNASYQLATVASPSDPSELTIVSKGVAGSAQPGPTQYLPDVSLTGGALGGLLAFRSQTLDPAQAQLGALAVSFASQVNAQNALGVDMSGNPGGSLFAVGAPAVYANQNNTGSATLSVSFVDGTQPTTSDYALSYDGAKYTLTDRATGSVVGTATPSSTPPTMTI…	667	BPSL0280
BKP2_00367	YALSYDGAKYTLTDRATGS	BPSL0280	365	MSNTLMNLGVSGLNAALWGLTTTGQNISNAATPGYSVERPVYAEASGQYTSSGYLPQGVSTVTVERQYNQYLSNQLNAAQTQGSSLSTYYTLVAQLNNYVGSPTAGIATAITNYFTGLQTVANNAADPSARQTAMSNAQTLASQLVAAGQQYSQLRQSVNSQLTDTVTQINSYTSQIAQLNEQIASASSQGQPPNQLLDQRDLAVSKLSQLAGVQVVQSNGNYSVFLSGGQPLVVGNASYQLATVASPSDPSELTIVSKGVAGSAQPGPTQYLPDVSLTGGALGGLLAFRSQTLDPAQAQLGALAVSFASQVNAQNALGVDMSGNPGGSLFAVGAPAVYANQNNTGSATLSVSFVDGTQPTTSDYALSYDGAKYTLTDRATGSVVGTATPSSTPPTMTI…	667	BPSL0280
BKP2_00368	LSYDGAKYTLTDRATGSVV	BPSL0280	367	MSNTLMNLGVSGLNAALWGLTTTGQNISNAATPGYSVERPVYAEASGQYTSSGYLPQGVSTVTVERQYNQYLSNQLNAAQTQGSSLSTYYTLVAQLNNYVGSPTAGIATAITNYFTGLQTVANNAADPSARQTAMSNAQTLASQLVAAGQQYSQLRQSVNSQLTDTVTQINSYTSQIAQLNEQIASASSQGQPPNQLLDQRDLAVSKLSQLAGVQVVQSNGNYSVFLSGGQPLVVGNASYQLATVASPSDPSELTIVSKGVAGSAQPGPTQYLPDVSLTGGALGGLLAFRSQTLDPAQAQLGALAVSFASQVNAQNALGVDMSGNPGGSLFAVGAPAVYANQNNTGSATLSVSFVDGTQPTTSDYALSYDGAKYTLTDRATGSVVGTATPSSTPPTMTI…	667	BPSL0280
BKP2_00369	YDGAKYTLTDRATGSVVGT	BPSL0280	369	MSNTLMNLGVSGLNAALWGLTTTGQNISNAATPGYSVERPVYAEASGQYTSSGYLPQGVSTVTVERQYNQYLSNQLNAAQTQGSSLSTYYTLVAQLNNYVGSPTAGIATAITNYFTGLQTVANNAADPSARQTAMSNAQTLASQLVAAGQQYSQLRQSVNSQLTDTVTQINSYTSQIAQLNEQIASASSQGQPPNQLLDQRDLAVSKLSQLAGVQVVQSNGNYSVFLSGGQPLVVGNASYQLATVASPSDPSELTIVSKGVAGSAQPGPTQYLPDVSLTGGALGGLLAFRSQTLDPAQAQLGALAVSFASQVNAQNALGVDMSGNPGGSLFAVGAPAVYANQNNTGSATLSVSFVDGTQPTTSDYALSYDGAKYTLTDRATGSVVGTATPSSTPPTMTI…	667	BPSL0280
BKP2_00370	GAKYTLTDRATGSVVGTAT	BPSL0280	371	MSNTLMNLGVSGLNAALWGLTTTGQNISNAATPGYSVERPVYAEASGQYTSSGYLPQGVSTVTVERQYNQYLSNQLNAAQTQGSSLSTYYTLVAQLNNYVGSPTAGIATAITNYFTGLQTVANNAADPSARQTAMSNAQTLASQLVAAGQQYSQLRQSVNSQLTDTVTQINSYTSQIAQLNEQIASASSQGQPPNQLLDQRDLAVSKLSQLAGVQVVQSNGNYSVFLSGGQPLVVGNASYQLATVASPSDPSELTIVSKGVAGSAQPGPTQYLPDVSLTGGALGGLLAFRSQTLDPAQAQLGALAVSFASQVNAQNALGVDMSGNPGGSLFAVGAPAVYANQNNTGSATLSVSFVDGTQPTTSDYALSYDGAKYTLTDRATGSVVGTATPSSTPPTMTI…	667	BPSL0280
BKP2_00371	KYTLTDRATGSVVGTATPS	BPSL0280	373	MSNTLMNLGVSGLNAALWGLTTTGQNISNAATPGYSVERPVYAEASGQYTSSGYLPQGVSTVTVERQYNQYLSNQLNAAQTQGSSLSTYYTLVAQLNNYVGSPTAGIATAITNYFTGLQTVANNAADPSARQTAMSNAQTLASQLVAAGQQYSQLRQSVNSQLTDTVTQINSYTSQIAQLNEQIASASSQGQPPNQLLDQRDLAVSKLSQLAGVQVVQSNGNYSVFLSGGQPLVVGNASYQLATVASPSDPSELTIVSKGVAGSAQPGPTQYLPDVSLTGGALGGLLAFRSQTLDPAQAQLGALAVSFASQVNAQNALGVDMSGNPGGSLFAVGAPAVYANQNNTGSATLSVSFVDGTQPTTSDYALSYDGAKYTLTDRATGSVVGTATPSSTPPTMTI…	667	BPSL0280
BKP2_00372	TLTDRATGSVVGTATPSST	BPSL0280	375	MSNTLMNLGVSGLNAALWGLTTTGQNISNAATPGYSVERPVYAEASGQYTSSGYLPQGVSTVTVERQYNQYLSNQLNAAQTQGSSLSTYYTLVAQLNNYVGSPTAGIATAITNYFTGLQTVANNAADPSARQTAMSNAQTLASQLVAAGQQYSQLRQSVNSQLTDTVTQINSYTSQIAQLNEQIASASSQGQPPNQLLDQRDLAVSKLSQLAGVQVVQSNGNYSVFLSGGQPLVVGNASYQLATVASPSDPSELTIVSKGVAGSAQPGPTQYLPDVSLTGGALGGLLAFRSQTLDPAQAQLGALAVSFASQVNAQNALGVDMSGNPGGSLFAVGAPAVYANQNNTGSATLSVSFVDGTQPTTSDYALSYDGAKYTLTDRATGSVVGTATPSSTPPTMTI…	667	BPSL0280
BKP2_00373	TDRATGSVVGTATPSSTPP	BPSL0280	377	MSNTLMNLGVSGLNAALWGLTTTGQNISNAATPGYSVERPVYAEASGQYTSSGYLPQGVSTVTVERQYNQYLSNQLNAAQTQGSSLSTYYTLVAQLNNYVGSPTAGIATAITNYFTGLQTVANNAADPSARQTAMSNAQTLASQLVAAGQQYSQLRQSVNSQLTDTVTQINSYTSQIAQLNEQIASASSQGQPPNQLLDQRDLAVSKLSQLAGVQVVQSNGNYSVFLSGGQPLVVGNASYQLATVASPSDPSELTIVSKGVAGSAQPGPTQYLPDVSLTGGALGGLLAFRSQTLDPAQAQLGALAVSFASQVNAQNALGVDMSGNPGGSLFAVGAPAVYANQNNTGSATLSVSFVDGTQPTTSDYALSYDGAKYTLTDRATGSVVGTATPSSTPPTMTI…	667	BPSL0280
BKP2_00374	RATGSVVGTATPSSTPPTM	BPSL0280	379	MSNTLMNLGVSGLNAALWGLTTTGQNISNAATPGYSVERPVYAEASGQYTSSGYLPQGVSTVTVERQYNQYLSNQLNAAQTQGSSLSTYYTLVAQLNNYVGSPTAGIATAITNYFTGLQTVANNAADPSARQTAMSNAQTLASQLVAAGQQYSQLRQSVNSQLTDTVTQINSYTSQIAQLNEQIASASSQGQPPNQLLDQRDLAVSKLSQLAGVQVVQSNGNYSVFLSGGQPLVVGNASYQLATVASPSDPSELTIVSKGVAGSAQPGPTQYLPDVSLTGGALGGLLAFRSQTLDPAQAQLGALAVSFASQVNAQNALGVDMSGNPGGSLFAVGAPAVYANQNNTGSATLSVSFVDGTQPTTSDYALSYDGAKYTLTDRATGSVVGTATPSSTPPTMTI…	667	BPSL0280
BKP2_00375	TGSVVGTATPSSTPPTMTI	BPSL0280	381	MSNTLMNLGVSGLNAALWGLTTTGQNISNAATPGYSVERPVYAEASGQYTSSGYLPQGVSTVTVERQYNQYLSNQLNAAQTQGSSLSTYYTLVAQLNNYVGSPTAGIATAITNYFTGLQTVANNAADPSARQTAMSNAQTLASQLVAAGQQYSQLRQSVNSQLTDTVTQINSYTSQIAQLNEQIASASSQGQPPNQLLDQRDLAVSKLSQLAGVQVVQSNGNYSVFLSGGQPLVVGNASYQLATVASPSDPSELTIVSKGVAGSAQPGPTQYLPDVSLTGGALGGLLAFRSQTLDPAQAQLGALAVSFASQVNAQNALGVDMSGNPGGSLFAVGAPAVYANQNNTGSATLSVSFVDGTQPTTSDYALSYDGAKYTLTDRATGSVVGTATPSSTPPTMTI…	667	BPSL0280
BKP2_00376	SVVGTATPSSTPPTMTIGG	BPSL0280	383	MSNTLMNLGVSGLNAALWGLTTTGQNISNAATPGYSVERPVYAEASGQYTSSGYLPQGVSTVTVERQYNQYLSNQLNAAQTQGSSLSTYYTLVAQLNNYVGSPTAGIATAITNYFTGLQTVANNAADPSARQTAMSNAQTLASQLVAAGQQYSQLRQSVNSQLTDTVTQINSYTSQIAQLNEQIASASSQGQPPNQLLDQRDLAVSKLSQLAGVQVVQSNGNYSVFLSGGQPLVVGNASYQLATVASPSDPSELTIVSKGVAGSAQPGPTQYLPDVSLTGGALGGLLAFRSQTLDPAQAQLGALAVSFASQVNAQNALGVDMSGNPGGSLFAVGAPAVYANQNNTGSATLSVSFVDGTQPTTSDYALSYDGAKYTLTDRATGSVVGTATPSSTPPTMTI…	667	BPSL0280
BKP2_00377	VGTATPSSTPPTMTIGGLK	BPSL0280	385	MSNTLMNLGVSGLNAALWGLTTTGQNISNAATPGYSVERPVYAEASGQYTSSGYLPQGVSTVTVERQYNQYLSNQLNAAQTQGSSLSTYYTLVAQLNNYVGSPTAGIATAITNYFTGLQTVANNAADPSARQTAMSNAQTLASQLVAAGQQYSQLRQSVNSQLTDTVTQINSYTSQIAQLNEQIASASSQGQPPNQLLDQRDLAVSKLSQLAGVQVVQSNGNYSVFLSGGQPLVVGNASYQLATVASPSDPSELTIVSKGVAGSAQPGPTQYLPDVSLTGGALGGLLAFRSQTLDPAQAQLGALAVSFASQVNAQNALGVDMSGNPGGSLFAVGAPAVYANQNNTGSATLSVSFVDGTQPTTSDYALSYDGAKYTLTDRATGSVVGTATPSSTPPTMTI…	667	BPSL0280
BKP2_00378	TATPSSTPPTMTIGGLKLS	BPSL0280	387	MSNTLMNLGVSGLNAALWGLTTTGQNISNAATPGYSVERPVYAEASGQYTSSGYLPQGVSTVTVERQYNQYLSNQLNAAQTQGSSLSTYYTLVAQLNNYVGSPTAGIATAITNYFTGLQTVANNAADPSARQTAMSNAQTLASQLVAAGQQYSQLRQSVNSQLTDTVTQINSYTSQIAQLNEQIASASSQGQPPNQLLDQRDLAVSKLSQLAGVQVVQSNGNYSVFLSGGQPLVVGNASYQLATVASPSDPSELTIVSKGVAGSAQPGPTQYLPDVSLTGGALGGLLAFRSQTLDPAQAQLGALAVSFASQVNAQNALGVDMSGNPGGSLFAVGAPAVYANQNNTGSATLSVSFVDGTQPTTSDYALSYDGAKYTLTDRATGSVVGTATPSSTPPTMTI…	667	BPSL0280
BKP2_00379	TPSSTPPTMTIGGLKLSLS	BPSL0280	389	MSNTLMNLGVSGLNAALWGLTTTGQNISNAATPGYSVERPVYAEASGQYTSSGYLPQGVSTVTVERQYNQYLSNQLNAAQTQGSSLSTYYTLVAQLNNYVGSPTAGIATAITNYFTGLQTVANNAADPSARQTAMSNAQTLASQLVAAGQQYSQLRQSVNSQLTDTVTQINSYTSQIAQLNEQIASASSQGQPPNQLLDQRDLAVSKLSQLAGVQVVQSNGNYSVFLSGGQPLVVGNASYQLATVASPSDPSELTIVSKGVAGSAQPGPTQYLPDVSLTGGALGGLLAFRSQTLDPAQAQLGALAVSFASQVNAQNALGVDMSGNPGGSLFAVGAPAVYANQNNTGSATLSVSFVDGTQPTTSDYALSYDGAKYTLTDRATGSVVGTATPSSTPPTMTI…	667	BPSL0280
BKP2_00380	SSTPPTMTIGGLKLSLSST	BPSL0280	391	MSNTLMNLGVSGLNAALWGLTTTGQNISNAATPGYSVERPVYAEASGQYTSSGYLPQGVSTVTVERQYNQYLSNQLNAAQTQGSSLSTYYTLVAQLNNYVGSPTAGIATAITNYFTGLQTVANNAADPSARQTAMSNAQTLASQLVAAGQQYSQLRQSVNSQLTDTVTQINSYTSQIAQLNEQIASASSQGQPPNQLLDQRDLAVSKLSQLAGVQVVQSNGNYSVFLSGGQPLVVGNASYQLATVASPSDPSELTIVSKGVAGSAQPGPTQYLPDVSLTGGALGGLLAFRSQTLDPAQAQLGALAVSFASQVNAQNALGVDMSGNPGGSLFAVGAPAVYANQNNTGSATLSVSFVDGTQPTTSDYALSYDGAKYTLTDRATGSVVGTATPSSTPPTMTI…	667	BPSL0280
BKP2_00381	TPPTMTIGGLKLSLSSTPN	BPSL0280	393	MSNTLMNLGVSGLNAALWGLTTTGQNISNAATPGYSVERPVYAEASGQYTSSGYLPQGVSTVTVERQYNQYLSNQLNAAQTQGSSLSTYYTLVAQLNNYVGSPTAGIATAITNYFTGLQTVANNAADPSARQTAMSNAQTLASQLVAAGQQYSQLRQSVNSQLTDTVTQINSYTSQIAQLNEQIASASSQGQPPNQLLDQRDLAVSKLSQLAGVQVVQSNGNYSVFLSGGQPLVVGNASYQLATVASPSDPSELTIVSKGVAGSAQPGPTQYLPDVSLTGGALGGLLAFRSQTLDPAQAQLGALAVSFASQVNAQNALGVDMSGNPGGSLFAVGAPAVYANQNNTGSATLSVSFVDGTQPTTSDYALSYDGAKYTLTDRATGSVVGTATPSSTPPTMTI…	667	BPSL0280
BKP2_00382	PTMTIGGLKLSLSSTPNAG	BPSL0280	395	MSNTLMNLGVSGLNAALWGLTTTGQNISNAATPGYSVERPVYAEASGQYTSSGYLPQGVSTVTVERQYNQYLSNQLNAAQTQGSSLSTYYTLVAQLNNYVGSPTAGIATAITNYFTGLQTVANNAADPSARQTAMSNAQTLASQLVAAGQQYSQLRQSVNSQLTDTVTQINSYTSQIAQLNEQIASASSQGQPPNQLLDQRDLAVSKLSQLAGVQVVQSNGNYSVFLSGGQPLVVGNASYQLATVASPSDPSELTIVSKGVAGSAQPGPTQYLPDVSLTGGALGGLLAFRSQTLDPAQAQLGALAVSFASQVNAQNALGVDMSGNPGGSLFAVGAPAVYANQNNTGSATLSVSFVDGTQPTTSDYALSYDGAKYTLTDRATGSVVGTATPSSTPPTMTI…	667	BPSL0280
BKP2_00383	MTIGGLKLSLSSTPNAGDS	BPSL0280	397	MSNTLMNLGVSGLNAALWGLTTTGQNISNAATPGYSVERPVYAEASGQYTSSGYLPQGVSTVTVERQYNQYLSNQLNAAQTQGSSLSTYYTLVAQLNNYVGSPTAGIATAITNYFTGLQTVANNAADPSARQTAMSNAQTLASQLVAAGQQYSQLRQSVNSQLTDTVTQINSYTSQIAQLNEQIASASSQGQPPNQLLDQRDLAVSKLSQLAGVQVVQSNGNYSVFLSGGQPLVVGNASYQLATVASPSDPSELTIVSKGVAGSAQPGPTQYLPDVSLTGGALGGLLAFRSQTLDPAQAQLGALAVSFASQVNAQNALGVDMSGNPGGSLFAVGAPAVYANQNNTGSATLSVSFVDGTQPTTSDYALSYDGAKYTLTDRATGSVVGTATPSSTPPTMTI…	667	BPSL0280
BKP2_00384	IGGLKLSLSSTPNAGDSFT	BPSL0280	399	MSNTLMNLGVSGLNAALWGLTTTGQNISNAATPGYSVERPVYAEASGQYTSSGYLPQGVSTVTVERQYNQYLSNQLNAAQTQGSSLSTYYTLVAQLNNYVGSPTAGIATAITNYFTGLQTVANNAADPSARQTAMSNAQTLASQLVAAGQQYSQLRQSVNSQLTDTVTQINSYTSQIAQLNEQIASASSQGQPPNQLLDQRDLAVSKLSQLAGVQVVQSNGNYSVFLSGGQPLVVGNASYQLATVASPSDPSELTIVSKGVAGSAQPGPTQYLPDVSLTGGALGGLLAFRSQTLDPAQAQLGALAVSFASQVNAQNALGVDMSGNPGGSLFAVGAPAVYANQNNTGSATLSVSFVDGTQPTTSDYALSYDGAKYTLTDRATGSVVGTATPSSTPPTMTI…	667	BPSL0280
BKP2_00385	GLKLSLSSTPNAGDSFTVL	BPSL0280	401	MSNTLMNLGVSGLNAALWGLTTTGQNISNAATPGYSVERPVYAEASGQYTSSGYLPQGVSTVTVERQYNQYLSNQLNAAQTQGSSLSTYYTLVAQLNNYVGSPTAGIATAITNYFTGLQTVANNAADPSARQTAMSNAQTLASQLVAAGQQYSQLRQSVNSQLTDTVTQINSYTSQIAQLNEQIASASSQGQPPNQLLDQRDLAVSKLSQLAGVQVVQSNGNYSVFLSGGQPLVVGNASYQLATVASPSDPSELTIVSKGVAGSAQPGPTQYLPDVSLTGGALGGLLAFRSQTLDPAQAQLGALAVSFASQVNAQNALGVDMSGNPGGSLFAVGAPAVYANQNNTGSATLSVSFVDGTQPTTSDYALSYDGAKYTLTDRATGSVVGTATPSSTPPTMTI…	667	BPSL0280
BKP2_00386	KLSLSSTPNAGDSFTVLPT	BPSL0280	403	MSNTLMNLGVSGLNAALWGLTTTGQNISNAATPGYSVERPVYAEASGQYTSSGYLPQGVSTVTVERQYNQYLSNQLNAAQTQGSSLSTYYTLVAQLNNYVGSPTAGIATAITNYFTGLQTVANNAADPSARQTAMSNAQTLASQLVAAGQQYSQLRQSVNSQLTDTVTQINSYTSQIAQLNEQIASASSQGQPPNQLLDQRDLAVSKLSQLAGVQVVQSNGNYSVFLSGGQPLVVGNASYQLATVASPSDPSELTIVSKGVAGSAQPGPTQYLPDVSLTGGALGGLLAFRSQTLDPAQAQLGALAVSFASQVNAQNALGVDMSGNPGGSLFAVGAPAVYANQNNTGSATLSVSFVDGTQPTTSDYALSYDGAKYTLTDRATGSVVGTATPSSTPPTMTI…	667	BPSL0280
BKP2_00387	SLSSTPNAGDSFTVLPTRG	BPSL0280	405	MSNTLMNLGVSGLNAALWGLTTTGQNISNAATPGYSVERPVYAEASGQYTSSGYLPQGVSTVTVERQYNQYLSNQLNAAQTQGSSLSTYYTLVAQLNNYVGSPTAGIATAITNYFTGLQTVANNAADPSARQTAMSNAQTLASQLVAAGQQYSQLRQSVNSQLTDTVTQINSYTSQIAQLNEQIASASSQGQPPNQLLDQRDLAVSKLSQLAGVQVVQSNGNYSVFLSGGQPLVVGNASYQLATVASPSDPSELTIVSKGVAGSAQPGPTQYLPDVSLTGGALGGLLAFRSQTLDPAQAQLGALAVSFASQVNAQNALGVDMSGNPGGSLFAVGAPAVYANQNNTGSATLSVSFVDGTQPTTSDYALSYDGAKYTLTDRATGSVVGTATPSSTPPTMTI…	667	BPSL0280
BKP2_00388	SSTPNAGDSFTVLPTRGAL	BPSL0280	407	MSNTLMNLGVSGLNAALWGLTTTGQNISNAATPGYSVERPVYAEASGQYTSSGYLPQGVSTVTVERQYNQYLSNQLNAAQTQGSSLSTYYTLVAQLNNYVGSPTAGIATAITNYFTGLQTVANNAADPSARQTAMSNAQTLASQLVAAGQQYSQLRQSVNSQLTDTVTQINSYTSQIAQLNEQIASASSQGQPPNQLLDQRDLAVSKLSQLAGVQVVQSNGNYSVFLSGGQPLVVGNASYQLATVASPSDPSELTIVSKGVAGSAQPGPTQYLPDVSLTGGALGGLLAFRSQTLDPAQAQLGALAVSFASQVNAQNALGVDMSGNPGGSLFAVGAPAVYANQNNTGSATLSVSFVDGTQPTTSDYALSYDGAKYTLTDRATGSVVGTATPSSTPPTMTI…	667	BPSL0280
BKP2_00389	TPNAGDSFTVLPTRGALDG	BPSL0280	409	MSNTLMNLGVSGLNAALWGLTTTGQNISNAATPGYSVERPVYAEASGQYTSSGYLPQGVSTVTVERQYNQYLSNQLNAAQTQGSSLSTYYTLVAQLNNYVGSPTAGIATAITNYFTGLQTVANNAADPSARQTAMSNAQTLASQLVAAGQQYSQLRQSVNSQLTDTVTQINSYTSQIAQLNEQIASASSQGQPPNQLLDQRDLAVSKLSQLAGVQVVQSNGNYSVFLSGGQPLVVGNASYQLATVASPSDPSELTIVSKGVAGSAQPGPTQYLPDVSLTGGALGGLLAFRSQTLDPAQAQLGALAVSFASQVNAQNALGVDMSGNPGGSLFAVGAPAVYANQNNTGSATLSVSFVDGTQPTTSDYALSYDGAKYTLTDRATGSVVGTATPSSTPPTMTI…	667	BPSL0280
BKP2_00390	NAGDSFTVLPTRGALDGFS	BPSL0280	411	MSNTLMNLGVSGLNAALWGLTTTGQNISNAATPGYSVERPVYAEASGQYTSSGYLPQGVSTVTVERQYNQYLSNQLNAAQTQGSSLSTYYTLVAQLNNYVGSPTAGIATAITNYFTGLQTVANNAADPSARQTAMSNAQTLASQLVAAGQQYSQLRQSVNSQLTDTVTQINSYTSQIAQLNEQIASASSQGQPPNQLLDQRDLAVSKLSQLAGVQVVQSNGNYSVFLSGGQPLVVGNASYQLATVASPSDPSELTIVSKGVAGSAQPGPTQYLPDVSLTGGALGGLLAFRSQTLDPAQAQLGALAVSFASQVNAQNALGVDMSGNPGGSLFAVGAPAVYANQNNTGSATLSVSFVDGTQPTTSDYALSYDGAKYTLTDRATGSVVGTATPSSTPPTMTI…	667	BPSL0280
BKP2_00391	GDSFTVLPTRGALDGFSLA	BPSL0280	413	MSNTLMNLGVSGLNAALWGLTTTGQNISNAATPGYSVERPVYAEASGQYTSSGYLPQGVSTVTVERQYNQYLSNQLNAAQTQGSSLSTYYTLVAQLNNYVGSPTAGIATAITNYFTGLQTVANNAADPSARQTAMSNAQTLASQLVAAGQQYSQLRQSVNSQLTDTVTQINSYTSQIAQLNEQIASASSQGQPPNQLLDQRDLAVSKLSQLAGVQVVQSNGNYSVFLSGGQPLVVGNASYQLATVASPSDPSELTIVSKGVAGSAQPGPTQYLPDVSLTGGALGGLLAFRSQTLDPAQAQLGALAVSFASQVNAQNALGVDMSGNPGGSLFAVGAPAVYANQNNTGSATLSVSFVDGTQPTTSDYALSYDGAKYTLTDRATGSVVGTATPSSTPPTMTI…	667	BPSL0280
BKP2_00392	SFTVLPTRGALDGFSLATA	BPSL0280	415	MSNTLMNLGVSGLNAALWGLTTTGQNISNAATPGYSVERPVYAEASGQYTSSGYLPQGVSTVTVERQYNQYLSNQLNAAQTQGSSLSTYYTLVAQLNNYVGSPTAGIATAITNYFTGLQTVANNAADPSARQTAMSNAQTLASQLVAAGQQYSQLRQSVNSQLTDTVTQINSYTSQIAQLNEQIASASSQGQPPNQLLDQRDLAVSKLSQLAGVQVVQSNGNYSVFLSGGQPLVVGNASYQLATVASPSDPSELTIVSKGVAGSAQPGPTQYLPDVSLTGGALGGLLAFRSQTLDPAQAQLGALAVSFASQVNAQNALGVDMSGNPGGSLFAVGAPAVYANQNNTGSATLSVSFVDGTQPTTSDYALSYDGAKYTLTDRATGSVVGTATPSSTPPTMTI…	667	BPSL0280
BKP2_00393	TVLPTRGALDGFSLATANG	BPSL0280	417	MSNTLMNLGVSGLNAALWGLTTTGQNISNAATPGYSVERPVYAEASGQYTSSGYLPQGVSTVTVERQYNQYLSNQLNAAQTQGSSLSTYYTLVAQLNNYVGSPTAGIATAITNYFTGLQTVANNAADPSARQTAMSNAQTLASQLVAAGQQYSQLRQSVNSQLTDTVTQINSYTSQIAQLNEQIASASSQGQPPNQLLDQRDLAVSKLSQLAGVQVVQSNGNYSVFLSGGQPLVVGNASYQLATVASPSDPSELTIVSKGVAGSAQPGPTQYLPDVSLTGGALGGLLAFRSQTLDPAQAQLGALAVSFASQVNAQNALGVDMSGNPGGSLFAVGAPAVYANQNNTGSATLSVSFVDGTQPTTSDYALSYDGAKYTLTDRATGSVVGTATPSSTPPTMTI…	667	BPSL0280
BKP2_00394	LPTRGALDGFSLATANGSA	BPSL0280	419	MSNTLMNLGVSGLNAALWGLTTTGQNISNAATPGYSVERPVYAEASGQYTSSGYLPQGVSTVTVERQYNQYLSNQLNAAQTQGSSLSTYYTLVAQLNNYVGSPTAGIATAITNYFTGLQTVANNAADPSARQTAMSNAQTLASQLVAAGQQYSQLRQSVNSQLTDTVTQINSYTSQIAQLNEQIASASSQGQPPNQLLDQRDLAVSKLSQLAGVQVVQSNGNYSVFLSGGQPLVVGNASYQLATVASPSDPSELTIVSKGVAGSAQPGPTQYLPDVSLTGGALGGLLAFRSQTLDPAQAQLGALAVSFASQVNAQNALGVDMSGNPGGSLFAVGAPAVYANQNNTGSATLSVSFVDGTQPTTSDYALSYDGAKYTLTDRATGSVVGTATPSSTPPTMTI…	667	BPSL0280
BKP2_00395	TRGALDGFSLATANGSAIA	BPSL0280	421	MSNTLMNLGVSGLNAALWGLTTTGQNISNAATPGYSVERPVYAEASGQYTSSGYLPQGVSTVTVERQYNQYLSNQLNAAQTQGSSLSTYYTLVAQLNNYVGSPTAGIATAITNYFTGLQTVANNAADPSARQTAMSNAQTLASQLVAAGQQYSQLRQSVNSQLTDTVTQINSYTSQIAQLNEQIASASSQGQPPNQLLDQRDLAVSKLSQLAGVQVVQSNGNYSVFLSGGQPLVVGNASYQLATVASPSDPSELTIVSKGVAGSAQPGPTQYLPDVSLTGGALGGLLAFRSQTLDPAQAQLGALAVSFASQVNAQNALGVDMSGNPGGSLFAVGAPAVYANQNNTGSATLSVSFVDGTQPTTSDYALSYDGAKYTLTDRATGSVVGTATPSSTPPTMTI…	667	BPSL0280
BKP2_00396	GALDGFSLATANGSAIAAA	BPSL0280	423	MSNTLMNLGVSGLNAALWGLTTTGQNISNAATPGYSVERPVYAEASGQYTSSGYLPQGVSTVTVERQYNQYLSNQLNAAQTQGSSLSTYYTLVAQLNNYVGSPTAGIATAITNYFTGLQTVANNAADPSARQTAMSNAQTLASQLVAAGQQYSQLRQSVNSQLTDTVTQINSYTSQIAQLNEQIASASSQGQPPNQLLDQRDLAVSKLSQLAGVQVVQSNGNYSVFLSGGQPLVVGNASYQLATVASPSDPSELTIVSKGVAGSAQPGPTQYLPDVSLTGGALGGLLAFRSQTLDPAQAQLGALAVSFASQVNAQNALGVDMSGNPGGSLFAVGAPAVYANQNNTGSATLSVSFVDGTQPTTSDYALSYDGAKYTLTDRATGSVVGTATPSSTPPTMTI…	667	BPSL0280
BKP2_00397	LDGFSLATANGSAIAAASP	BPSL0280	425	MSNTLMNLGVSGLNAALWGLTTTGQNISNAATPGYSVERPVYAEASGQYTSSGYLPQGVSTVTVERQYNQYLSNQLNAAQTQGSSLSTYYTLVAQLNNYVGSPTAGIATAITNYFTGLQTVANNAADPSARQTAMSNAQTLASQLVAAGQQYSQLRQSVNSQLTDTVTQINSYTSQIAQLNEQIASASSQGQPPNQLLDQRDLAVSKLSQLAGVQVVQSNGNYSVFLSGGQPLVVGNASYQLATVASPSDPSELTIVSKGVAGSAQPGPTQYLPDVSLTGGALGGLLAFRSQTLDPAQAQLGALAVSFASQVNAQNALGVDMSGNPGGSLFAVGAPAVYANQNNTGSATLSVSFVDGTQPTTSDYALSYDGAKYTLTDRATGSVVGTATPSSTPPTMTI…	667	BPSL0280
BKP2_00398	GFSLATANGSAIAAASPVL	BPSL0280	427	MSNTLMNLGVSGLNAALWGLTTTGQNISNAATPGYSVERPVYAEASGQYTSSGYLPQGVSTVTVERQYNQYLSNQLNAAQTQGSSLSTYYTLVAQLNNYVGSPTAGIATAITNYFTGLQTVANNAADPSARQTAMSNAQTLASQLVAAGQQYSQLRQSVNSQLTDTVTQINSYTSQIAQLNEQIASASSQGQPPNQLLDQRDLAVSKLSQLAGVQVVQSNGNYSVFLSGGQPLVVGNASYQLATVASPSDPSELTIVSKGVAGSAQPGPTQYLPDVSLTGGALGGLLAFRSQTLDPAQAQLGALAVSFASQVNAQNALGVDMSGNPGGSLFAVGAPAVYANQNNTGSATLSVSFVDGTQPTTSDYALSYDGAKYTLTDRATGSVVGTATPSSTPPTMTI…	667	BPSL0280
BKP2_00399	SLATANGSAIAAASPVLAA	BPSL0280	429	MSNTLMNLGVSGLNAALWGLTTTGQNISNAATPGYSVERPVYAEASGQYTSSGYLPQGVSTVTVERQYNQYLSNQLNAAQTQGSSLSTYYTLVAQLNNYVGSPTAGIATAITNYFTGLQTVANNAADPSARQTAMSNAQTLASQLVAAGQQYSQLRQSVNSQLTDTVTQINSYTSQIAQLNEQIASASSQGQPPNQLLDQRDLAVSKLSQLAGVQVVQSNGNYSVFLSGGQPLVVGNASYQLATVASPSDPSELTIVSKGVAGSAQPGPTQYLPDVSLTGGALGGLLAFRSQTLDPAQAQLGALAVSFASQVNAQNALGVDMSGNPGGSLFAVGAPAVYANQNNTGSATLSVSFVDGTQPTTSDYALSYDGAKYTLTDRATGSVVGTATPSSTPPTMTI…	667	BPSL0280
BKP2_00400	ATANGSAIAAASPVLAAGV	BPSL0280	431	MSNTLMNLGVSGLNAALWGLTTTGQNISNAATPGYSVERPVYAEASGQYTSSGYLPQGVSTVTVERQYNQYLSNQLNAAQTQGSSLSTYYTLVAQLNNYVGSPTAGIATAITNYFTGLQTVANNAADPSARQTAMSNAQTLASQLVAAGQQYSQLRQSVNSQLTDTVTQINSYTSQIAQLNEQIASASSQGQPPNQLLDQRDLAVSKLSQLAGVQVVQSNGNYSVFLSGGQPLVVGNASYQLATVASPSDPSELTIVSKGVAGSAQPGPTQYLPDVSLTGGALGGLLAFRSQTLDPAQAQLGALAVSFASQVNAQNALGVDMSGNPGGSLFAVGAPAVYANQNNTGSATLSVSFVDGTQPTTSDYALSYDGAKYTLTDRATGSVVGTATPSSTPPTMTI…	667	BPSL0280
BKP2_00401	ANGSAIAAASPVLAAGVAT	BPSL0280	433	MSNTLMNLGVSGLNAALWGLTTTGQNISNAATPGYSVERPVYAEASGQYTSSGYLPQGVSTVTVERQYNQYLSNQLNAAQTQGSSLSTYYTLVAQLNNYVGSPTAGIATAITNYFTGLQTVANNAADPSARQTAMSNAQTLASQLVAAGQQYSQLRQSVNSQLTDTVTQINSYTSQIAQLNEQIASASSQGQPPNQLLDQRDLAVSKLSQLAGVQVVQSNGNYSVFLSGGQPLVVGNASYQLATVASPSDPSELTIVSKGVAGSAQPGPTQYLPDVSLTGGALGGLLAFRSQTLDPAQAQLGALAVSFASQVNAQNALGVDMSGNPGGSLFAVGAPAVYANQNNTGSATLSVSFVDGTQPTTSDYALSYDGAKYTLTDRATGSVVGTATPSSTPPTMTI…	667	BPSL0280
BKP2_00402	GSAIAAASPVLAAGVATNS	BPSL0280	435	MSNTLMNLGVSGLNAALWGLTTTGQNISNAATPGYSVERPVYAEASGQYTSSGYLPQGVSTVTVERQYNQYLSNQLNAAQTQGSSLSTYYTLVAQLNNYVGSPTAGIATAITNYFTGLQTVANNAADPSARQTAMSNAQTLASQLVAAGQQYSQLRQSVNSQLTDTVTQINSYTSQIAQLNEQIASASSQGQPPNQLLDQRDLAVSKLSQLAGVQVVQSNGNYSVFLSGGQPLVVGNASYQLATVASPSDPSELTIVSKGVAGSAQPGPTQYLPDVSLTGGALGGLLAFRSQTLDPAQAQLGALAVSFASQVNAQNALGVDMSGNPGGSLFAVGAPAVYANQNNTGSATLSVSFVDGTQPTTSDYALSYDGAKYTLTDRATGSVVGTATPSSTPPTMTI…	667	BPSL0280
BKP2_00403	AIAAASPVLAAGVATNSGT	BPSL0280	437	MSNTLMNLGVSGLNAALWGLTTTGQNISNAATPGYSVERPVYAEASGQYTSSGYLPQGVSTVTVERQYNQYLSNQLNAAQTQGSSLSTYYTLVAQLNNYVGSPTAGIATAITNYFTGLQTVANNAADPSARQTAMSNAQTLASQLVAAGQQYSQLRQSVNSQLTDTVTQINSYTSQIAQLNEQIASASSQGQPPNQLLDQRDLAVSKLSQLAGVQVVQSNGNYSVFLSGGQPLVVGNASYQLATVASPSDPSELTIVSKGVAGSAQPGPTQYLPDVSLTGGALGGLLAFRSQTLDPAQAQLGALAVSFASQVNAQNALGVDMSGNPGGSLFAVGAPAVYANQNNTGSATLSVSFVDGTQPTTSDYALSYDGAKYTLTDRATGSVVGTATPSSTPPTMTI…	667	BPSL0280
BKP2_00404	AAASPVLAAGVATNSGTGV	BPSL0280	439	MSNTLMNLGVSGLNAALWGLTTTGQNISNAATPGYSVERPVYAEASGQYTSSGYLPQGVSTVTVERQYNQYLSNQLNAAQTQGSSLSTYYTLVAQLNNYVGSPTAGIATAITNYFTGLQTVANNAADPSARQTAMSNAQTLASQLVAAGQQYSQLRQSVNSQLTDTVTQINSYTSQIAQLNEQIASASSQGQPPNQLLDQRDLAVSKLSQLAGVQVVQSNGNYSVFLSGGQPLVVGNASYQLATVASPSDPSELTIVSKGVAGSAQPGPTQYLPDVSLTGGALGGLLAFRSQTLDPAQAQLGALAVSFASQVNAQNALGVDMSGNPGGSLFAVGAPAVYANQNNTGSATLSVSFVDGTQPTTSDYALSYDGAKYTLTDRATGSVVGTATPSSTPPTMTI…	667	BPSL0280
BKP2_00405	ASPVLAAGVATNSGTGVIS	BPSL0280	441	MSNTLMNLGVSGLNAALWGLTTTGQNISNAATPGYSVERPVYAEASGQYTSSGYLPQGVSTVTVERQYNQYLSNQLNAAQTQGSSLSTYYTLVAQLNNYVGSPTAGIATAITNYFTGLQTVANNAADPSARQTAMSNAQTLASQLVAAGQQYSQLRQSVNSQLTDTVTQINSYTSQIAQLNEQIASASSQGQPPNQLLDQRDLAVSKLSQLAGVQVVQSNGNYSVFLSGGQPLVVGNASYQLATVASPSDPSELTIVSKGVAGSAQPGPTQYLPDVSLTGGALGGLLAFRSQTLDPAQAQLGALAVSFASQVNAQNALGVDMSGNPGGSLFAVGAPAVYANQNNTGSATLSVSFVDGTQPTTSDYALSYDGAKYTLTDRATGSVVGTATPSSTPPTMTI…	667	BPSL0280
BKP2_00406	PVLAAGVATNSGTGVISQG	BPSL0280	443	MSNTLMNLGVSGLNAALWGLTTTGQNISNAATPGYSVERPVYAEASGQYTSSGYLPQGVSTVTVERQYNQYLSNQLNAAQTQGSSLSTYYTLVAQLNNYVGSPTAGIATAITNYFTGLQTVANNAADPSARQTAMSNAQTLASQLVAAGQQYSQLRQSVNSQLTDTVTQINSYTSQIAQLNEQIASASSQGQPPNQLLDQRDLAVSKLSQLAGVQVVQSNGNYSVFLSGGQPLVVGNASYQLATVASPSDPSELTIVSKGVAGSAQPGPTQYLPDVSLTGGALGGLLAFRSQTLDPAQAQLGALAVSFASQVNAQNALGVDMSGNPGGSLFAVGAPAVYANQNNTGSATLSVSFVDGTQPTTSDYALSYDGAKYTLTDRATGSVVGTATPSSTPPTMTI…	667	BPSL0280
BKP2_00407	LAAGVATNSGTGVISQGSV	BPSL0280	445	MSNTLMNLGVSGLNAALWGLTTTGQNISNAATPGYSVERPVYAEASGQYTSSGYLPQGVSTVTVERQYNQYLSNQLNAAQTQGSSLSTYYTLVAQLNNYVGSPTAGIATAITNYFTGLQTVANNAADPSARQTAMSNAQTLASQLVAAGQQYSQLRQSVNSQLTDTVTQINSYTSQIAQLNEQIASASSQGQPPNQLLDQRDLAVSKLSQLAGVQVVQSNGNYSVFLSGGQPLVVGNASYQLATVASPSDPSELTIVSKGVAGSAQPGPTQYLPDVSLTGGALGGLLAFRSQTLDPAQAQLGALAVSFASQVNAQNALGVDMSGNPGGSLFAVGAPAVYANQNNTGSATLSVSFVDGTQPTTSDYALSYDGAKYTLTDRATGSVVGTATPSSTPPTMTI…	667	BPSL0280
BKP2_00408	AGVATNSGTGVISQGSVSA	BPSL0280	447	MSNTLMNLGVSGLNAALWGLTTTGQNISNAATPGYSVERPVYAEASGQYTSSGYLPQGVSTVTVERQYNQYLSNQLNAAQTQGSSLSTYYTLVAQLNNYVGSPTAGIATAITNYFTGLQTVANNAADPSARQTAMSNAQTLASQLVAAGQQYSQLRQSVNSQLTDTVTQINSYTSQIAQLNEQIASASSQGQPPNQLLDQRDLAVSKLSQLAGVQVVQSNGNYSVFLSGGQPLVVGNASYQLATVASPSDPSELTIVSKGVAGSAQPGPTQYLPDVSLTGGALGGLLAFRSQTLDPAQAQLGALAVSFASQVNAQNALGVDMSGNPGGSLFAVGAPAVYANQNNTGSATLSVSFVDGTQPTTSDYALSYDGAKYTLTDRATGSVVGTATPSSTPPTMTI…	667	BPSL0280
BKP2_00409	VATNSGTGVISQGSVSAGY	BPSL0280	449	MSNTLMNLGVSGLNAALWGLTTTGQNISNAATPGYSVERPVYAEASGQYTSSGYLPQGVSTVTVERQYNQYLSNQLNAAQTQGSSLSTYYTLVAQLNNYVGSPTAGIATAITNYFTGLQTVANNAADPSARQTAMSNAQTLASQLVAAGQQYSQLRQSVNSQLTDTVTQINSYTSQIAQLNEQIASASSQGQPPNQLLDQRDLAVSKLSQLAGVQVVQSNGNYSVFLSGGQPLVVGNASYQLATVASPSDPSELTIVSKGVAGSAQPGPTQYLPDVSLTGGALGGLLAFRSQTLDPAQAQLGALAVSFASQVNAQNALGVDMSGNPGGSLFAVGAPAVYANQNNTGSATLSVSFVDGTQPTTSDYALSYDGAKYTLTDRATGSVVGTATPSSTPPTMTI…	667	BPSL0280
BKP2_00410	TNSGTGVISQGSVSAGYQL	BPSL0280	451	MSNTLMNLGVSGLNAALWGLTTTGQNISNAATPGYSVERPVYAEASGQYTSSGYLPQGVSTVTVERQYNQYLSNQLNAAQTQGSSLSTYYTLVAQLNNYVGSPTAGIATAITNYFTGLQTVANNAADPSARQTAMSNAQTLASQLVAAGQQYSQLRQSVNSQLTDTVTQINSYTSQIAQLNEQIASASSQGQPPNQLLDQRDLAVSKLSQLAGVQVVQSNGNYSVFLSGGQPLVVGNASYQLATVASPSDPSELTIVSKGVAGSAQPGPTQYLPDVSLTGGALGGLLAFRSQTLDPAQAQLGALAVSFASQVNAQNALGVDMSGNPGGSLFAVGAPAVYANQNNTGSATLSVSFVDGTQPTTSDYALSYDGAKYTLTDRATGSVVGTATPSSTPPTMTI…	667	BPSL0280
BKP2_00411	SGTGVISQGSVSAGYQLPS	BPSL0280	453	MSNTLMNLGVSGLNAALWGLTTTGQNISNAATPGYSVERPVYAEASGQYTSSGYLPQGVSTVTVERQYNQYLSNQLNAAQTQGSSLSTYYTLVAQLNNYVGSPTAGIATAITNYFTGLQTVANNAADPSARQTAMSNAQTLASQLVAAGQQYSQLRQSVNSQLTDTVTQINSYTSQIAQLNEQIASASSQGQPPNQLLDQRDLAVSKLSQLAGVQVVQSNGNYSVFLSGGQPLVVGNASYQLATVASPSDPSELTIVSKGVAGSAQPGPTQYLPDVSLTGGALGGLLAFRSQTLDPAQAQLGALAVSFASQVNAQNALGVDMSGNPGGSLFAVGAPAVYANQNNTGSATLSVSFVDGTQPTTSDYALSYDGAKYTLTDRATGSVVGTATPSSTPPTMTI…	667	BPSL0280
BKP2_00412	TGVISQGSVSAGYQLPSGT	BPSL0280	455	MSNTLMNLGVSGLNAALWGLTTTGQNISNAATPGYSVERPVYAEASGQYTSSGYLPQGVSTVTVERQYNQYLSNQLNAAQTQGSSLSTYYTLVAQLNNYVGSPTAGIATAITNYFTGLQTVANNAADPSARQTAMSNAQTLASQLVAAGQQYSQLRQSVNSQLTDTVTQINSYTSQIAQLNEQIASASSQGQPPNQLLDQRDLAVSKLSQLAGVQVVQSNGNYSVFLSGGQPLVVGNASYQLATVASPSDPSELTIVSKGVAGSAQPGPTQYLPDVSLTGGALGGLLAFRSQTLDPAQAQLGALAVSFASQVNAQNALGVDMSGNPGGSLFAVGAPAVYANQNNTGSATLSVSFVDGTQPTTSDYALSYDGAKYTLTDRATGSVVGTATPSSTPPTMTI…	667	BPSL0280
BKP2_00413	VISQGSVSAGYQLPSGTTT	BPSL0280	457	MSNTLMNLGVSGLNAALWGLTTTGQNISNAATPGYSVERPVYAEASGQYTSSGYLPQGVSTVTVERQYNQYLSNQLNAAQTQGSSLSTYYTLVAQLNNYVGSPTAGIATAITNYFTGLQTVANNAADPSARQTAMSNAQTLASQLVAAGQQYSQLRQSVNSQLTDTVTQINSYTSQIAQLNEQIASASSQGQPPNQLLDQRDLAVSKLSQLAGVQVVQSNGNYSVFLSGGQPLVVGNASYQLATVASPSDPSELTIVSKGVAGSAQPGPTQYLPDVSLTGGALGGLLAFRSQTLDPAQAQLGALAVSFASQVNAQNALGVDMSGNPGGSLFAVGAPAVYANQNNTGSATLSVSFVDGTQPTTSDYALSYDGAKYTLTDRATGSVVGTATPSSTPPTMTI…	667	BPSL0280
BKP2_00414	SQGSVSAGYQLPSGTTTLA	BPSL0280	459	MSNTLMNLGVSGLNAALWGLTTTGQNISNAATPGYSVERPVYAEASGQYTSSGYLPQGVSTVTVERQYNQYLSNQLNAAQTQGSSLSTYYTLVAQLNNYVGSPTAGIATAITNYFTGLQTVANNAADPSARQTAMSNAQTLASQLVAAGQQYSQLRQSVNSQLTDTVTQINSYTSQIAQLNEQIASASSQGQPPNQLLDQRDLAVSKLSQLAGVQVVQSNGNYSVFLSGGQPLVVGNASYQLATVASPSDPSELTIVSKGVAGSAQPGPTQYLPDVSLTGGALGGLLAFRSQTLDPAQAQLGALAVSFASQVNAQNALGVDMSGNPGGSLFAVGAPAVYANQNNTGSATLSVSFVDGTQPTTSDYALSYDGAKYTLTDRATGSVVGTATPSSTPPTMTI…	667	BPSL0280
BKP2_00415	GSVSAGYQLPSGTTTLAYN	BPSL0280	461	MSNTLMNLGVSGLNAALWGLTTTGQNISNAATPGYSVERPVYAEASGQYTSSGYLPQGVSTVTVERQYNQYLSNQLNAAQTQGSSLSTYYTLVAQLNNYVGSPTAGIATAITNYFTGLQTVANNAADPSARQTAMSNAQTLASQLVAAGQQYSQLRQSVNSQLTDTVTQINSYTSQIAQLNEQIASASSQGQPPNQLLDQRDLAVSKLSQLAGVQVVQSNGNYSVFLSGGQPLVVGNASYQLATVASPSDPSELTIVSKGVAGSAQPGPTQYLPDVSLTGGALGGLLAFRSQTLDPAQAQLGALAVSFASQVNAQNALGVDMSGNPGGSLFAVGAPAVYANQNNTGSATLSVSFVDGTQPTTSDYALSYDGAKYTLTDRATGSVVGTATPSSTPPTMTI…	667	BPSL0280
BKP2_00416	VSAGYQLPSGTTTLAYNAA	BPSL0280	463	MSNTLMNLGVSGLNAALWGLTTTGQNISNAATPGYSVERPVYAEASGQYTSSGYLPQGVSTVTVERQYNQYLSNQLNAAQTQGSSLSTYYTLVAQLNNYVGSPTAGIATAITNYFTGLQTVANNAADPSARQTAMSNAQTLASQLVAAGQQYSQLRQSVNSQLTDTVTQINSYTSQIAQLNEQIASASSQGQPPNQLLDQRDLAVSKLSQLAGVQVVQSNGNYSVFLSGGQPLVVGNASYQLATVASPSDPSELTIVSKGVAGSAQPGPTQYLPDVSLTGGALGGLLAFRSQTLDPAQAQLGALAVSFASQVNAQNALGVDMSGNPGGSLFAVGAPAVYANQNNTGSATLSVSFVDGTQPTTSDYALSYDGAKYTLTDRATGSVVGTATPSSTPPTMTI…	667	BPSL0280
BKP2_00417	AGYQLPSGTTTLAYNAASK	BPSL0280	465	MSNTLMNLGVSGLNAALWGLTTTGQNISNAATPGYSVERPVYAEASGQYTSSGYLPQGVSTVTVERQYNQYLSNQLNAAQTQGSSLSTYYTLVAQLNNYVGSPTAGIATAITNYFTGLQTVANNAADPSARQTAMSNAQTLASQLVAAGQQYSQLRQSVNSQLTDTVTQINSYTSQIAQLNEQIASASSQGQPPNQLLDQRDLAVSKLSQLAGVQVVQSNGNYSVFLSGGQPLVVGNASYQLATVASPSDPSELTIVSKGVAGSAQPGPTQYLPDVSLTGGALGGLLAFRSQTLDPAQAQLGALAVSFASQVNAQNALGVDMSGNPGGSLFAVGAPAVYANQNNTGSATLSVSFVDGTQPTTSDYALSYDGAKYTLTDRATGSVVGTATPSSTPPTMTI…	667	BPSL0280
BKP2_00418	YQLPSGTTTLAYNAASKTL	BPSL0280	467	MSNTLMNLGVSGLNAALWGLTTTGQNISNAATPGYSVERPVYAEASGQYTSSGYLPQGVSTVTVERQYNQYLSNQLNAAQTQGSSLSTYYTLVAQLNNYVGSPTAGIATAITNYFTGLQTVANNAADPSARQTAMSNAQTLASQLVAAGQQYSQLRQSVNSQLTDTVTQINSYTSQIAQLNEQIASASSQGQPPNQLLDQRDLAVSKLSQLAGVQVVQSNGNYSVFLSGGQPLVVGNASYQLATVASPSDPSELTIVSKGVAGSAQPGPTQYLPDVSLTGGALGGLLAFRSQTLDPAQAQLGALAVSFASQVNAQNALGVDMSGNPGGSLFAVGAPAVYANQNNTGSATLSVSFVDGTQPTTSDYALSYDGAKYTLTDRATGSVVGTATPSSTPPTMTI…	667	BPSL0280
BKP2_00419	LPSGTTTLAYNAASKTLSG	BPSL0280	469	MSNTLMNLGVSGLNAALWGLTTTGQNISNAATPGYSVERPVYAEASGQYTSSGYLPQGVSTVTVERQYNQYLSNQLNAAQTQGSSLSTYYTLVAQLNNYVGSPTAGIATAITNYFTGLQTVANNAADPSARQTAMSNAQTLASQLVAAGQQYSQLRQSVNSQLTDTVTQINSYTSQIAQLNEQIASASSQGQPPNQLLDQRDLAVSKLSQLAGVQVVQSNGNYSVFLSGGQPLVVGNASYQLATVASPSDPSELTIVSKGVAGSAQPGPTQYLPDVSLTGGALGGLLAFRSQTLDPAQAQLGALAVSFASQVNAQNALGVDMSGNPGGSLFAVGAPAVYANQNNTGSATLSVSFVDGTQPTTSDYALSYDGAKYTLTDRATGSVVGTATPSSTPPTMTI…	667	BPSL0280
BKP2_00420	SGTTTLAYNAASKTLSGFP	BPSL0280	471	MSNTLMNLGVSGLNAALWGLTTTGQNISNAATPGYSVERPVYAEASGQYTSSGYLPQGVSTVTVERQYNQYLSNQLNAAQTQGSSLSTYYTLVAQLNNYVGSPTAGIATAITNYFTGLQTVANNAADPSARQTAMSNAQTLASQLVAAGQQYSQLRQSVNSQLTDTVTQINSYTSQIAQLNEQIASASSQGQPPNQLLDQRDLAVSKLSQLAGVQVVQSNGNYSVFLSGGQPLVVGNASYQLATVASPSDPSELTIVSKGVAGSAQPGPTQYLPDVSLTGGALGGLLAFRSQTLDPAQAQLGALAVSFASQVNAQNALGVDMSGNPGGSLFAVGAPAVYANQNNTGSATLSVSFVDGTQPTTSDYALSYDGAKYTLTDRATGSVVGTATPSSTPPTMTI…	667	BPSL0280
BKP2_00421	TTTLAYNAASKTLSGFPVG	BPSL0280	473	MSNTLMNLGVSGLNAALWGLTTTGQNISNAATPGYSVERPVYAEASGQYTSSGYLPQGVSTVTVERQYNQYLSNQLNAAQTQGSSLSTYYTLVAQLNNYVGSPTAGIATAITNYFTGLQTVANNAADPSARQTAMSNAQTLASQLVAAGQQYSQLRQSVNSQLTDTVTQINSYTSQIAQLNEQIASASSQGQPPNQLLDQRDLAVSKLSQLAGVQVVQSNGNYSVFLSGGQPLVVGNASYQLATVASPSDPSELTIVSKGVAGSAQPGPTQYLPDVSLTGGALGGLLAFRSQTLDPAQAQLGALAVSFASQVNAQNALGVDMSGNPGGSLFAVGAPAVYANQNNTGSATLSVSFVDGTQPTTSDYALSYDGAKYTLTDRATGSVVGTATPSSTPPTMTI…	667	BPSL0280
BKP2_00422	TLAYNAASKTLSGFPVGTT	BPSL0280	475	MSNTLMNLGVSGLNAALWGLTTTGQNISNAATPGYSVERPVYAEASGQYTSSGYLPQGVSTVTVERQYNQYLSNQLNAAQTQGSSLSTYYTLVAQLNNYVGSPTAGIATAITNYFTGLQTVANNAADPSARQTAMSNAQTLASQLVAAGQQYSQLRQSVNSQLTDTVTQINSYTSQIAQLNEQIASASSQGQPPNQLLDQRDLAVSKLSQLAGVQVVQSNGNYSVFLSGGQPLVVGNASYQLATVASPSDPSELTIVSKGVAGSAQPGPTQYLPDVSLTGGALGGLLAFRSQTLDPAQAQLGALAVSFASQVNAQNALGVDMSGNPGGSLFAVGAPAVYANQNNTGSATLSVSFVDGTQPTTSDYALSYDGAKYTLTDRATGSVVGTATPSSTPPTMTI…	667	BPSL0280
BKP2_00423	AYNAASKTLSGFPVGTTVT	BPSL0280	477	MSNTLMNLGVSGLNAALWGLTTTGQNISNAATPGYSVERPVYAEASGQYTSSGYLPQGVSTVTVERQYNQYLSNQLNAAQTQGSSLSTYYTLVAQLNNYVGSPTAGIATAITNYFTGLQTVANNAADPSARQTAMSNAQTLASQLVAAGQQYSQLRQSVNSQLTDTVTQINSYTSQIAQLNEQIASASSQGQPPNQLLDQRDLAVSKLSQLAGVQVVQSNGNYSVFLSGGQPLVVGNASYQLATVASPSDPSELTIVSKGVAGSAQPGPTQYLPDVSLTGGALGGLLAFRSQTLDPAQAQLGALAVSFASQVNAQNALGVDMSGNPGGSLFAVGAPAVYANQNNTGSATLSVSFVDGTQPTTSDYALSYDGAKYTLTDRATGSVVGTATPSSTPPTMTI…	667	BPSL0280
BKP2_00424	NAASKTLSGFPVGTTVTIA	BPSL0280	479	MSNTLMNLGVSGLNAALWGLTTTGQNISNAATPGYSVERPVYAEASGQYTSSGYLPQGVSTVTVERQYNQYLSNQLNAAQTQGSSLSTYYTLVAQLNNYVGSPTAGIATAITNYFTGLQTVANNAADPSARQTAMSNAQTLASQLVAAGQQYSQLRQSVNSQLTDTVTQINSYTSQIAQLNEQIASASSQGQPPNQLLDQRDLAVSKLSQLAGVQVVQSNGNYSVFLSGGQPLVVGNASYQLATVASPSDPSELTIVSKGVAGSAQPGPTQYLPDVSLTGGALGGLLAFRSQTLDPAQAQLGALAVSFASQVNAQNALGVDMSGNPGGSLFAVGAPAVYANQNNTGSATLSVSFVDGTQPTTSDYALSYDGAKYTLTDRATGSVVGTATPSSTPPTMTI…	667	BPSL0280
BKP2_00425	ASKTLSGFPVGTTVTIAGT	BPSL0280	481	MSNTLMNLGVSGLNAALWGLTTTGQNISNAATPGYSVERPVYAEASGQYTSSGYLPQGVSTVTVERQYNQYLSNQLNAAQTQGSSLSTYYTLVAQLNNYVGSPTAGIATAITNYFTGLQTVANNAADPSARQTAMSNAQTLASQLVAAGQQYSQLRQSVNSQLTDTVTQINSYTSQIAQLNEQIASASSQGQPPNQLLDQRDLAVSKLSQLAGVQVVQSNGNYSVFLSGGQPLVVGNASYQLATVASPSDPSELTIVSKGVAGSAQPGPTQYLPDVSLTGGALGGLLAFRSQTLDPAQAQLGALAVSFASQVNAQNALGVDMSGNPGGSLFAVGAPAVYANQNNTGSATLSVSFVDGTQPTTSDYALSYDGAKYTLTDRATGSVVGTATPSSTPPTMTI…	667	BPSL0280
BKP2_00426	KTLSGFPVGTTVTIAGTPP	BPSL0280	483	MSNTLMNLGVSGLNAALWGLTTTGQNISNAATPGYSVERPVYAEASGQYTSSGYLPQGVSTVTVERQYNQYLSNQLNAAQTQGSSLSTYYTLVAQLNNYVGSPTAGIATAITNYFTGLQTVANNAADPSARQTAMSNAQTLASQLVAAGQQYSQLRQSVNSQLTDTVTQINSYTSQIAQLNEQIASASSQGQPPNQLLDQRDLAVSKLSQLAGVQVVQSNGNYSVFLSGGQPLVVGNASYQLATVASPSDPSELTIVSKGVAGSAQPGPTQYLPDVSLTGGALGGLLAFRSQTLDPAQAQLGALAVSFASQVNAQNALGVDMSGNPGGSLFAVGAPAVYANQNNTGSATLSVSFVDGTQPTTSDYALSYDGAKYTLTDRATGSVVGTATPSSTPPTMTI…	667	BPSL0280
BKP2_00427	LSGFPVGTTVTIAGTPPTS	BPSL0280	485	MSNTLMNLGVSGLNAALWGLTTTGQNISNAATPGYSVERPVYAEASGQYTSSGYLPQGVSTVTVERQYNQYLSNQLNAAQTQGSSLSTYYTLVAQLNNYVGSPTAGIATAITNYFTGLQTVANNAADPSARQTAMSNAQTLASQLVAAGQQYSQLRQSVNSQLTDTVTQINSYTSQIAQLNEQIASASSQGQPPNQLLDQRDLAVSKLSQLAGVQVVQSNGNYSVFLSGGQPLVVGNASYQLATVASPSDPSELTIVSKGVAGSAQPGPTQYLPDVSLTGGALGGLLAFRSQTLDPAQAQLGALAVSFASQVNAQNALGVDMSGNPGGSLFAVGAPAVYANQNNTGSATLSVSFVDGTQPTTSDYALSYDGAKYTLTDRATGSVVGTATPSSTPPTMTI…	667	BPSL0280
BKP2_00428	GFPVGTTVTIAGTPPTSIN	BPSL0280	487	MSNTLMNLGVSGLNAALWGLTTTGQNISNAATPGYSVERPVYAEASGQYTSSGYLPQGVSTVTVERQYNQYLSNQLNAAQTQGSSLSTYYTLVAQLNNYVGSPTAGIATAITNYFTGLQTVANNAADPSARQTAMSNAQTLASQLVAAGQQYSQLRQSVNSQLTDTVTQINSYTSQIAQLNEQIASASSQGQPPNQLLDQRDLAVSKLSQLAGVQVVQSNGNYSVFLSGGQPLVVGNASYQLATVASPSDPSELTIVSKGVAGSAQPGPTQYLPDVSLTGGALGGLLAFRSQTLDPAQAQLGALAVSFASQVNAQNALGVDMSGNPGGSLFAVGAPAVYANQNNTGSATLSVSFVDGTQPTTSDYALSYDGAKYTLTDRATGSVVGTATPSSTPPTMTI…	667	BPSL0280
BKP2_00429	PVGTTVTIAGTPPTSINIT	BPSL0280	489	MSNTLMNLGVSGLNAALWGLTTTGQNISNAATPGYSVERPVYAEASGQYTSSGYLPQGVSTVTVERQYNQYLSNQLNAAQTQGSSLSTYYTLVAQLNNYVGSPTAGIATAITNYFTGLQTVANNAADPSARQTAMSNAQTLASQLVAAGQQYSQLRQSVNSQLTDTVTQINSYTSQIAQLNEQIASASSQGQPPNQLLDQRDLAVSKLSQLAGVQVVQSNGNYSVFLSGGQPLVVGNASYQLATVASPSDPSELTIVSKGVAGSAQPGPTQYLPDVSLTGGALGGLLAFRSQTLDPAQAQLGALAVSFASQVNAQNALGVDMSGNPGGSLFAVGAPAVYANQNNTGSATLSVSFVDGTQPTTSDYALSYDGAKYTLTDRATGSVVGTATPSSTPPTMTI…	667	BPSL0280
BKP2_00430	GTTVTIAGTPPTSINITSA	BPSL0280	491	MSNTLMNLGVSGLNAALWGLTTTGQNISNAATPGYSVERPVYAEASGQYTSSGYLPQGVSTVTVERQYNQYLSNQLNAAQTQGSSLSTYYTLVAQLNNYVGSPTAGIATAITNYFTGLQTVANNAADPSARQTAMSNAQTLASQLVAAGQQYSQLRQSVNSQLTDTVTQINSYTSQIAQLNEQIASASSQGQPPNQLLDQRDLAVSKLSQLAGVQVVQSNGNYSVFLSGGQPLVVGNASYQLATVASPSDPSELTIVSKGVAGSAQPGPTQYLPDVSLTGGALGGLLAFRSQTLDPAQAQLGALAVSFASQVNAQNALGVDMSGNPGGSLFAVGAPAVYANQNNTGSATLSVSFVDGTQPTTSDYALSYDGAKYTLTDRATGSVVGTATPSSTPPTMTI…	667	BPSL0280
BKP2_00431	TVTIAGTPPTSINITSATT	BPSL0280	493	MSNTLMNLGVSGLNAALWGLTTTGQNISNAATPGYSVERPVYAEASGQYTSSGYLPQGVSTVTVERQYNQYLSNQLNAAQTQGSSLSTYYTLVAQLNNYVGSPTAGIATAITNYFTGLQTVANNAADPSARQTAMSNAQTLASQLVAAGQQYSQLRQSVNSQLTDTVTQINSYTSQIAQLNEQIASASSQGQPPNQLLDQRDLAVSKLSQLAGVQVVQSNGNYSVFLSGGQPLVVGNASYQLATVASPSDPSELTIVSKGVAGSAQPGPTQYLPDVSLTGGALGGLLAFRSQTLDPAQAQLGALAVSFASQVNAQNALGVDMSGNPGGSLFAVGAPAVYANQNNTGSATLSVSFVDGTQPTTSDYALSYDGAKYTLTDRATGSVVGTATPSSTPPTMTI…	667	BPSL0280
BKP2_00432	TIAGTPPTSINITSATTPV	BPSL0280	495	MSNTLMNLGVSGLNAALWGLTTTGQNISNAATPGYSVERPVYAEASGQYTSSGYLPQGVSTVTVERQYNQYLSNQLNAAQTQGSSLSTYYTLVAQLNNYVGSPTAGIATAITNYFTGLQTVANNAADPSARQTAMSNAQTLASQLVAAGQQYSQLRQSVNSQLTDTVTQINSYTSQIAQLNEQIASASSQGQPPNQLLDQRDLAVSKLSQLAGVQVVQSNGNYSVFLSGGQPLVVGNASYQLATVASPSDPSELTIVSKGVAGSAQPGPTQYLPDVSLTGGALGGLLAFRSQTLDPAQAQLGALAVSFASQVNAQNALGVDMSGNPGGSLFAVGAPAVYANQNNTGSATLSVSFVDGTQPTTSDYALSYDGAKYTLTDRATGSVVGTATPSSTPPTMTI…	667	BPSL0280
BKP2_00433	AGTPPTSINITSATTPVPY	BPSL0280	497	MSNTLMNLGVSGLNAALWGLTTTGQNISNAATPGYSVERPVYAEASGQYTSSGYLPQGVSTVTVERQYNQYLSNQLNAAQTQGSSLSTYYTLVAQLNNYVGSPTAGIATAITNYFTGLQTVANNAADPSARQTAMSNAQTLASQLVAAGQQYSQLRQSVNSQLTDTVTQINSYTSQIAQLNEQIASASSQGQPPNQLLDQRDLAVSKLSQLAGVQVVQSNGNYSVFLSGGQPLVVGNASYQLATVASPSDPSELTIVSKGVAGSAQPGPTQYLPDVSLTGGALGGLLAFRSQTLDPAQAQLGALAVSFASQVNAQNALGVDMSGNPGGSLFAVGAPAVYANQNNTGSATLSVSFVDGTQPTTSDYALSYDGAKYTLTDRATGSVVGTATPSSTPPTMTI…	667	BPSL0280
BKP2_00434	TPPTSINITSATTPVPYDP	BPSL0280	499	MSNTLMNLGVSGLNAALWGLTTTGQNISNAATPGYSVERPVYAEASGQYTSSGYLPQGVSTVTVERQYNQYLSNQLNAAQTQGSSLSTYYTLVAQLNNYVGSPTAGIATAITNYFTGLQTVANNAADPSARQTAMSNAQTLASQLVAAGQQYSQLRQSVNSQLTDTVTQINSYTSQIAQLNEQIASASSQGQPPNQLLDQRDLAVSKLSQLAGVQVVQSNGNYSVFLSGGQPLVVGNASYQLATVASPSDPSELTIVSKGVAGSAQPGPTQYLPDVSLTGGALGGLLAFRSQTLDPAQAQLGALAVSFASQVNAQNALGVDMSGNPGGSLFAVGAPAVYANQNNTGSATLSVSFVDGTQPTTSDYALSYDGAKYTLTDRATGSVVGTATPSSTPPTMTI…	667	BPSL0280
BKP2_00435	PTSINITSATTPVPYDPSK	BPSL0280	501	MSNTLMNLGVSGLNAALWGLTTTGQNISNAATPGYSVERPVYAEASGQYTSSGYLPQGVSTVTVERQYNQYLSNQLNAAQTQGSSLSTYYTLVAQLNNYVGSPTAGIATAITNYFTGLQTVANNAADPSARQTAMSNAQTLASQLVAAGQQYSQLRQSVNSQLTDTVTQINSYTSQIAQLNEQIASASSQGQPPNQLLDQRDLAVSKLSQLAGVQVVQSNGNYSVFLSGGQPLVVGNASYQLATVASPSDPSELTIVSKGVAGSAQPGPTQYLPDVSLTGGALGGLLAFRSQTLDPAQAQLGALAVSFASQVNAQNALGVDMSGNPGGSLFAVGAPAVYANQNNTGSATLSVSFVDGTQPTTSDYALSYDGAKYTLTDRATGSVVGTATPSSTPPTMTI…	667	BPSL0280
BKP2_00436	SINITSATTPVPYDPSKGA	BPSL0280	503	MSNTLMNLGVSGLNAALWGLTTTGQNISNAATPGYSVERPVYAEASGQYTSSGYLPQGVSTVTVERQYNQYLSNQLNAAQTQGSSLSTYYTLVAQLNNYVGSPTAGIATAITNYFTGLQTVANNAADPSARQTAMSNAQTLASQLVAAGQQYSQLRQSVNSQLTDTVTQINSYTSQIAQLNEQIASASSQGQPPNQLLDQRDLAVSKLSQLAGVQVVQSNGNYSVFLSGGQPLVVGNASYQLATVASPSDPSELTIVSKGVAGSAQPGPTQYLPDVSLTGGALGGLLAFRSQTLDPAQAQLGALAVSFASQVNAQNALGVDMSGNPGGSLFAVGAPAVYANQNNTGSATLSVSFVDGTQPTTSDYALSYDGAKYTLTDRATGSVVGTATPSSTPPTMTI…	667	BPSL0280
BKP2_00437	NITSATTPVPYDPSKGASM	BPSL0280	505	MSNTLMNLGVSGLNAALWGLTTTGQNISNAATPGYSVERPVYAEASGQYTSSGYLPQGVSTVTVERQYNQYLSNQLNAAQTQGSSLSTYYTLVAQLNNYVGSPTAGIATAITNYFTGLQTVANNAADPSARQTAMSNAQTLASQLVAAGQQYSQLRQSVNSQLTDTVTQINSYTSQIAQLNEQIASASSQGQPPNQLLDQRDLAVSKLSQLAGVQVVQSNGNYSVFLSGGQPLVVGNASYQLATVASPSDPSELTIVSKGVAGSAQPGPTQYLPDVSLTGGALGGLLAFRSQTLDPAQAQLGALAVSFASQVNAQNALGVDMSGNPGGSLFAVGAPAVYANQNNTGSATLSVSFVDGTQPTTSDYALSYDGAKYTLTDRATGSVVGTATPSSTPPTMTI…	667	BPSL0280
BKP2_00438	TSATTPVPYDPSKGASMTI	BPSL0280	507	MSNTLMNLGVSGLNAALWGLTTTGQNISNAATPGYSVERPVYAEASGQYTSSGYLPQGVSTVTVERQYNQYLSNQLNAAQTQGSSLSTYYTLVAQLNNYVGSPTAGIATAITNYFTGLQTVANNAADPSARQTAMSNAQTLASQLVAAGQQYSQLRQSVNSQLTDTVTQINSYTSQIAQLNEQIASASSQGQPPNQLLDQRDLAVSKLSQLAGVQVVQSNGNYSVFLSGGQPLVVGNASYQLATVASPSDPSELTIVSKGVAGSAQPGPTQYLPDVSLTGGALGGLLAFRSQTLDPAQAQLGALAVSFASQVNAQNALGVDMSGNPGGSLFAVGAPAVYANQNNTGSATLSVSFVDGTQPTTSDYALSYDGAKYTLTDRATGSVVGTATPSSTPPTMTI…	667	BPSL0280
BKP2_00439	ATTPVPYDPSKGASMTISS	BPSL0280	509	MSNTLMNLGVSGLNAALWGLTTTGQNISNAATPGYSVERPVYAEASGQYTSSGYLPQGVSTVTVERQYNQYLSNQLNAAQTQGSSLSTYYTLVAQLNNYVGSPTAGIATAITNYFTGLQTVANNAADPSARQTAMSNAQTLASQLVAAGQQYSQLRQSVNSQLTDTVTQINSYTSQIAQLNEQIASASSQGQPPNQLLDQRDLAVSKLSQLAGVQVVQSNGNYSVFLSGGQPLVVGNASYQLATVASPSDPSELTIVSKGVAGSAQPGPTQYLPDVSLTGGALGGLLAFRSQTLDPAQAQLGALAVSFASQVNAQNALGVDMSGNPGGSLFAVGAPAVYANQNNTGSATLSVSFVDGTQPTTSDYALSYDGAKYTLTDRATGSVVGTATPSSTPPTMTI…	667	BPSL0280
BKP2_00440	TPVPYDPSKGASMTISSTT	BPSL0280	511	MSNTLMNLGVSGLNAALWGLTTTGQNISNAATPGYSVERPVYAEASGQYTSSGYLPQGVSTVTVERQYNQYLSNQLNAAQTQGSSLSTYYTLVAQLNNYVGSPTAGIATAITNYFTGLQTVANNAADPSARQTAMSNAQTLASQLVAAGQQYSQLRQSVNSQLTDTVTQINSYTSQIAQLNEQIASASSQGQPPNQLLDQRDLAVSKLSQLAGVQVVQSNGNYSVFLSGGQPLVVGNASYQLATVASPSDPSELTIVSKGVAGSAQPGPTQYLPDVSLTGGALGGLLAFRSQTLDPAQAQLGALAVSFASQVNAQNALGVDMSGNPGGSLFAVGAPAVYANQNNTGSATLSVSFVDGTQPTTSDYALSYDGAKYTLTDRATGSVVGTATPSSTPPTMTI…	667	BPSL0280
BKP2_00441	VPYDPSKGASMTISSTTQP	BPSL0280	513	MSNTLMNLGVSGLNAALWGLTTTGQNISNAATPGYSVERPVYAEASGQYTSSGYLPQGVSTVTVERQYNQYLSNQLNAAQTQGSSLSTYYTLVAQLNNYVGSPTAGIATAITNYFTGLQTVANNAADPSARQTAMSNAQTLASQLVAAGQQYSQLRQSVNSQLTDTVTQINSYTSQIAQLNEQIASASSQGQPPNQLLDQRDLAVSKLSQLAGVQVVQSNGNYSVFLSGGQPLVVGNASYQLATVASPSDPSELTIVSKGVAGSAQPGPTQYLPDVSLTGGALGGLLAFRSQTLDPAQAQLGALAVSFASQVNAQNALGVDMSGNPGGSLFAVGAPAVYANQNNTGSATLSVSFVDGTQPTTSDYALSYDGAKYTLTDRATGSVVGTATPSSTPPTMTI…	667	BPSL0280
BKP2_00442	YDPSKGASMTISSTTQPAP	BPSL0280	515	MSNTLMNLGVSGLNAALWGLTTTGQNISNAATPGYSVERPVYAEASGQYTSSGYLPQGVSTVTVERQYNQYLSNQLNAAQTQGSSLSTYYTLVAQLNNYVGSPTAGIATAITNYFTGLQTVANNAADPSARQTAMSNAQTLASQLVAAGQQYSQLRQSVNSQLTDTVTQINSYTSQIAQLNEQIASASSQGQPPNQLLDQRDLAVSKLSQLAGVQVVQSNGNYSVFLSGGQPLVVGNASYQLATVASPSDPSELTIVSKGVAGSAQPGPTQYLPDVSLTGGALGGLLAFRSQTLDPAQAQLGALAVSFASQVNAQNALGVDMSGNPGGSLFAVGAPAVYANQNNTGSATLSVSFVDGTQPTTSDYALSYDGAKYTLTDRATGSVVGTATPSSTPPTMTI…	667	BPSL0280
BKP2_00443	PSKGASMTISSTTQPAPSG	BPSL0280	517	MSNTLMNLGVSGLNAALWGLTTTGQNISNAATPGYSVERPVYAEASGQYTSSGYLPQGVSTVTVERQYNQYLSNQLNAAQTQGSSLSTYYTLVAQLNNYVGSPTAGIATAITNYFTGLQTVANNAADPSARQTAMSNAQTLASQLVAAGQQYSQLRQSVNSQLTDTVTQINSYTSQIAQLNEQIASASSQGQPPNQLLDQRDLAVSKLSQLAGVQVVQSNGNYSVFLSGGQPLVVGNASYQLATVASPSDPSELTIVSKGVAGSAQPGPTQYLPDVSLTGGALGGLLAFRSQTLDPAQAQLGALAVSFASQVNAQNALGVDMSGNPGGSLFAVGAPAVYANQNNTGSATLSVSFVDGTQPTTSDYALSYDGAKYTLTDRATGSVVGTATPSSTPPTMTI…	667	BPSL0280
BKP2_00444	KGASMTISSTTQPAPSGVM	BPSL0280	519	MSNTLMNLGVSGLNAALWGLTTTGQNISNAATPGYSVERPVYAEASGQYTSSGYLPQGVSTVTVERQYNQYLSNQLNAAQTQGSSLSTYYTLVAQLNNYVGSPTAGIATAITNYFTGLQTVANNAADPSARQTAMSNAQTLASQLVAAGQQYSQLRQSVNSQLTDTVTQINSYTSQIAQLNEQIASASSQGQPPNQLLDQRDLAVSKLSQLAGVQVVQSNGNYSVFLSGGQPLVVGNASYQLATVASPSDPSELTIVSKGVAGSAQPGPTQYLPDVSLTGGALGGLLAFRSQTLDPAQAQLGALAVSFASQVNAQNALGVDMSGNPGGSLFAVGAPAVYANQNNTGSATLSVSFVDGTQPTTSDYALSYDGAKYTLTDRATGSVVGTATPSSTPPTMTI…	667	BPSL0280
BKP2_00445	ASMTISSTTQPAPSGVMNG	BPSL0280	521	MSNTLMNLGVSGLNAALWGLTTTGQNISNAATPGYSVERPVYAEASGQYTSSGYLPQGVSTVTVERQYNQYLSNQLNAAQTQGSSLSTYYTLVAQLNNYVGSPTAGIATAITNYFTGLQTVANNAADPSARQTAMSNAQTLASQLVAAGQQYSQLRQSVNSQLTDTVTQINSYTSQIAQLNEQIASASSQGQPPNQLLDQRDLAVSKLSQLAGVQVVQSNGNYSVFLSGGQPLVVGNASYQLATVASPSDPSELTIVSKGVAGSAQPGPTQYLPDVSLTGGALGGLLAFRSQTLDPAQAQLGALAVSFASQVNAQNALGVDMSGNPGGSLFAVGAPAVYANQNNTGSATLSVSFVDGTQPTTSDYALSYDGAKYTLTDRATGSVVGTATPSSTPPTMTI…	667	BPSL0280
BKP2_00446	MTISSTTQPAPSGVMNGVS	BPSL0280	523	MSNTLMNLGVSGLNAALWGLTTTGQNISNAATPGYSVERPVYAEASGQYTSSGYLPQGVSTVTVERQYNQYLSNQLNAAQTQGSSLSTYYTLVAQLNNYVGSPTAGIATAITNYFTGLQTVANNAADPSARQTAMSNAQTLASQLVAAGQQYSQLRQSVNSQLTDTVTQINSYTSQIAQLNEQIASASSQGQPPNQLLDQRDLAVSKLSQLAGVQVVQSNGNYSVFLSGGQPLVVGNASYQLATVASPSDPSELTIVSKGVAGSAQPGPTQYLPDVSLTGGALGGLLAFRSQTLDPAQAQLGALAVSFASQVNAQNALGVDMSGNPGGSLFAVGAPAVYANQNNTGSATLSVSFVDGTQPTTSDYALSYDGAKYTLTDRATGSVVGTATPSSTPPTMTI…	667	BPSL0280
BKP2_00447	ISSTTQPAPSGVMNGVSVS	BPSL0280	525	MSNTLMNLGVSGLNAALWGLTTTGQNISNAATPGYSVERPVYAEASGQYTSSGYLPQGVSTVTVERQYNQYLSNQLNAAQTQGSSLSTYYTLVAQLNNYVGSPTAGIATAITNYFTGLQTVANNAADPSARQTAMSNAQTLASQLVAAGQQYSQLRQSVNSQLTDTVTQINSYTSQIAQLNEQIASASSQGQPPNQLLDQRDLAVSKLSQLAGVQVVQSNGNYSVFLSGGQPLVVGNASYQLATVASPSDPSELTIVSKGVAGSAQPGPTQYLPDVSLTGGALGGLLAFRSQTLDPAQAQLGALAVSFASQVNAQNALGVDMSGNPGGSLFAVGAPAVYANQNNTGSATLSVSFVDGTQPTTSDYALSYDGAKYTLTDRATGSVVGTATPSSTPPTMTI…	667	BPSL0280
BKP2_00448	STTQPAPSGVMNGVSVSLS	BPSL0280	527	MSNTLMNLGVSGLNAALWGLTTTGQNISNAATPGYSVERPVYAEASGQYTSSGYLPQGVSTVTVERQYNQYLSNQLNAAQTQGSSLSTYYTLVAQLNNYVGSPTAGIATAITNYFTGLQTVANNAADPSARQTAMSNAQTLASQLVAAGQQYSQLRQSVNSQLTDTVTQINSYTSQIAQLNEQIASASSQGQPPNQLLDQRDLAVSKLSQLAGVQVVQSNGNYSVFLSGGQPLVVGNASYQLATVASPSDPSELTIVSKGVAGSAQPGPTQYLPDVSLTGGALGGLLAFRSQTLDPAQAQLGALAVSFASQVNAQNALGVDMSGNPGGSLFAVGAPAVYANQNNTGSATLSVSFVDGTQPTTSDYALSYDGAKYTLTDRATGSVVGTATPSSTPPTMTI…	667	BPSL0280
BKP2_00449	TQPAPSGVMNGVSVSLSGT	BPSL0280	529	MSNTLMNLGVSGLNAALWGLTTTGQNISNAATPGYSVERPVYAEASGQYTSSGYLPQGVSTVTVERQYNQYLSNQLNAAQTQGSSLSTYYTLVAQLNNYVGSPTAGIATAITNYFTGLQTVANNAADPSARQTAMSNAQTLASQLVAAGQQYSQLRQSVNSQLTDTVTQINSYTSQIAQLNEQIASASSQGQPPNQLLDQRDLAVSKLSQLAGVQVVQSNGNYSVFLSGGQPLVVGNASYQLATVASPSDPSELTIVSKGVAGSAQPGPTQYLPDVSLTGGALGGLLAFRSQTLDPAQAQLGALAVSFASQVNAQNALGVDMSGNPGGSLFAVGAPAVYANQNNTGSATLSVSFVDGTQPTTSDYALSYDGAKYTLTDRATGSVVGTATPSSTPPTMTI…	667	BPSL0280
BKP2_00450	PAPSGVMNGVSVSLSGTPA	BPSL0280	531	MSNTLMNLGVSGLNAALWGLTTTGQNISNAATPGYSVERPVYAEASGQYTSSGYLPQGVSTVTVERQYNQYLSNQLNAAQTQGSSLSTYYTLVAQLNNYVGSPTAGIATAITNYFTGLQTVANNAADPSARQTAMSNAQTLASQLVAAGQQYSQLRQSVNSQLTDTVTQINSYTSQIAQLNEQIASASSQGQPPNQLLDQRDLAVSKLSQLAGVQVVQSNGNYSVFLSGGQPLVVGNASYQLATVASPSDPSELTIVSKGVAGSAQPGPTQYLPDVSLTGGALGGLLAFRSQTLDPAQAQLGALAVSFASQVNAQNALGVDMSGNPGGSLFAVGAPAVYANQNNTGSATLSVSFVDGTQPTTSDYALSYDGAKYTLTDRATGSVVGTATPSSTPPTMTI…	667	BPSL0280
BKP2_00451	PSGVMNGVSVSLSGTPADG	BPSL0280	533	MSNTLMNLGVSGLNAALWGLTTTGQNISNAATPGYSVERPVYAEASGQYTSSGYLPQGVSTVTVERQYNQYLSNQLNAAQTQGSSLSTYYTLVAQLNNYVGSPTAGIATAITNYFTGLQTVANNAADPSARQTAMSNAQTLASQLVAAGQQYSQLRQSVNSQLTDTVTQINSYTSQIAQLNEQIASASSQGQPPNQLLDQRDLAVSKLSQLAGVQVVQSNGNYSVFLSGGQPLVVGNASYQLATVASPSDPSELTIVSKGVAGSAQPGPTQYLPDVSLTGGALGGLLAFRSQTLDPAQAQLGALAVSFASQVNAQNALGVDMSGNPGGSLFAVGAPAVYANQNNTGSATLSVSFVDGTQPTTSDYALSYDGAKYTLTDRATGSVVGTATPSSTPPTMTI…	667	BPSL0280
BKP2_00452	GVMNGVSVSLSGTPADGDQ	BPSL0280	535	MSNTLMNLGVSGLNAALWGLTTTGQNISNAATPGYSVERPVYAEASGQYTSSGYLPQGVSTVTVERQYNQYLSNQLNAAQTQGSSLSTYYTLVAQLNNYVGSPTAGIATAITNYFTGLQTVANNAADPSARQTAMSNAQTLASQLVAAGQQYSQLRQSVNSQLTDTVTQINSYTSQIAQLNEQIASASSQGQPPNQLLDQRDLAVSKLSQLAGVQVVQSNGNYSVFLSGGQPLVVGNASYQLATVASPSDPSELTIVSKGVAGSAQPGPTQYLPDVSLTGGALGGLLAFRSQTLDPAQAQLGALAVSFASQVNAQNALGVDMSGNPGGSLFAVGAPAVYANQNNTGSATLSVSFVDGTQPTTSDYALSYDGAKYTLTDRATGSVVGTATPSSTPPTMTI…	667	BPSL0280
BKP2_00453	MNGVSVSLSGTPADGDQFT	BPSL0280	537	MSNTLMNLGVSGLNAALWGLTTTGQNISNAATPGYSVERPVYAEASGQYTSSGYLPQGVSTVTVERQYNQYLSNQLNAAQTQGSSLSTYYTLVAQLNNYVGSPTAGIATAITNYFTGLQTVANNAADPSARQTAMSNAQTLASQLVAAGQQYSQLRQSVNSQLTDTVTQINSYTSQIAQLNEQIASASSQGQPPNQLLDQRDLAVSKLSQLAGVQVVQSNGNYSVFLSGGQPLVVGNASYQLATVASPSDPSELTIVSKGVAGSAQPGPTQYLPDVSLTGGALGGLLAFRSQTLDPAQAQLGALAVSFASQVNAQNALGVDMSGNPGGSLFAVGAPAVYANQNNTGSATLSVSFVDGTQPTTSDYALSYDGAKYTLTDRATGSVVGTATPSSTPPTMTI…	667	BPSL0280
BKP2_00454	GVSVSLSGTPADGDQFTIG	BPSL0280	539	MSNTLMNLGVSGLNAALWGLTTTGQNISNAATPGYSVERPVYAEASGQYTSSGYLPQGVSTVTVERQYNQYLSNQLNAAQTQGSSLSTYYTLVAQLNNYVGSPTAGIATAITNYFTGLQTVANNAADPSARQTAMSNAQTLASQLVAAGQQYSQLRQSVNSQLTDTVTQINSYTSQIAQLNEQIASASSQGQPPNQLLDQRDLAVSKLSQLAGVQVVQSNGNYSVFLSGGQPLVVGNASYQLATVASPSDPSELTIVSKGVAGSAQPGPTQYLPDVSLTGGALGGLLAFRSQTLDPAQAQLGALAVSFASQVNAQNALGVDMSGNPGGSLFAVGAPAVYANQNNTGSATLSVSFVDGTQPTTSDYALSYDGAKYTLTDRATGSVVGTATPSSTPPTMTI…	667	BPSL0280
BKP2_00455	SVSLSGTPADGDQFTIGAN	BPSL0280	541	MSNTLMNLGVSGLNAALWGLTTTGQNISNAATPGYSVERPVYAEASGQYTSSGYLPQGVSTVTVERQYNQYLSNQLNAAQTQGSSLSTYYTLVAQLNNYVGSPTAGIATAITNYFTGLQTVANNAADPSARQTAMSNAQTLASQLVAAGQQYSQLRQSVNSQLTDTVTQINSYTSQIAQLNEQIASASSQGQPPNQLLDQRDLAVSKLSQLAGVQVVQSNGNYSVFLSGGQPLVVGNASYQLATVASPSDPSELTIVSKGVAGSAQPGPTQYLPDVSLTGGALGGLLAFRSQTLDPAQAQLGALAVSFASQVNAQNALGVDMSGNPGGSLFAVGAPAVYANQNNTGSATLSVSFVDGTQPTTSDYALSYDGAKYTLTDRATGSVVGTATPSSTPPTMTI…	667	BPSL0280
BKP2_00456	SLSGTPADGDQFTIGANKG	BPSL0280	543	MSNTLMNLGVSGLNAALWGLTTTGQNISNAATPGYSVERPVYAEASGQYTSSGYLPQGVSTVTVERQYNQYLSNQLNAAQTQGSSLSTYYTLVAQLNNYVGSPTAGIATAITNYFTGLQTVANNAADPSARQTAMSNAQTLASQLVAAGQQYSQLRQSVNSQLTDTVTQINSYTSQIAQLNEQIASASSQGQPPNQLLDQRDLAVSKLSQLAGVQVVQSNGNYSVFLSGGQPLVVGNASYQLATVASPSDPSELTIVSKGVAGSAQPGPTQYLPDVSLTGGALGGLLAFRSQTLDPAQAQLGALAVSFASQVNAQNALGVDMSGNPGGSLFAVGAPAVYANQNNTGSATLSVSFVDGTQPTTSDYALSYDGAKYTLTDRATGSVVGTATPSSTPPTMTI…	667	BPSL0280
BKP2_00457	SGTPADGDQFTIGANKGTN	BPSL0280	545	MSNTLMNLGVSGLNAALWGLTTTGQNISNAATPGYSVERPVYAEASGQYTSSGYLPQGVSTVTVERQYNQYLSNQLNAAQTQGSSLSTYYTLVAQLNNYVGSPTAGIATAITNYFTGLQTVANNAADPSARQTAMSNAQTLASQLVAAGQQYSQLRQSVNSQLTDTVTQINSYTSQIAQLNEQIASASSQGQPPNQLLDQRDLAVSKLSQLAGVQVVQSNGNYSVFLSGGQPLVVGNASYQLATVASPSDPSELTIVSKGVAGSAQPGPTQYLPDVSLTGGALGGLLAFRSQTLDPAQAQLGALAVSFASQVNAQNALGVDMSGNPGGSLFAVGAPAVYANQNNTGSATLSVSFVDGTQPTTSDYALSYDGAKYTLTDRATGSVVGTATPSSTPPTMTI…	667	BPSL0280
BKP2_00458	TPADGDQFTIGANKGTNDG	BPSL0280	547	MSNTLMNLGVSGLNAALWGLTTTGQNISNAATPGYSVERPVYAEASGQYTSSGYLPQGVSTVTVERQYNQYLSNQLNAAQTQGSSLSTYYTLVAQLNNYVGSPTAGIATAITNYFTGLQTVANNAADPSARQTAMSNAQTLASQLVAAGQQYSQLRQSVNSQLTDTVTQINSYTSQIAQLNEQIASASSQGQPPNQLLDQRDLAVSKLSQLAGVQVVQSNGNYSVFLSGGQPLVVGNASYQLATVASPSDPSELTIVSKGVAGSAQPGPTQYLPDVSLTGGALGGLLAFRSQTLDPAQAQLGALAVSFASQVNAQNALGVDMSGNPGGSLFAVGAPAVYANQNNTGSATLSVSFVDGTQPTTSDYALSYDGAKYTLTDRATGSVVGTATPSSTPPTMTI…	667	BPSL0280
BKP2_00459	ADGDQFTIGANKGTNDGRN	BPSL0280	549	MSNTLMNLGVSGLNAALWGLTTTGQNISNAATPGYSVERPVYAEASGQYTSSGYLPQGVSTVTVERQYNQYLSNQLNAAQTQGSSLSTYYTLVAQLNNYVGSPTAGIATAITNYFTGLQTVANNAADPSARQTAMSNAQTLASQLVAAGQQYSQLRQSVNSQLTDTVTQINSYTSQIAQLNEQIASASSQGQPPNQLLDQRDLAVSKLSQLAGVQVVQSNGNYSVFLSGGQPLVVGNASYQLATVASPSDPSELTIVSKGVAGSAQPGPTQYLPDVSLTGGALGGLLAFRSQTLDPAQAQLGALAVSFASQVNAQNALGVDMSGNPGGSLFAVGAPAVYANQNNTGSATLSVSFVDGTQPTTSDYALSYDGAKYTLTDRATGSVVGTATPSSTPPTMTI…	667	BPSL0280
BKP2_00460	GDQFTIGANKGTNDGRNAL	BPSL0280	551	MSNTLMNLGVSGLNAALWGLTTTGQNISNAATPGYSVERPVYAEASGQYTSSGYLPQGVSTVTVERQYNQYLSNQLNAAQTQGSSLSTYYTLVAQLNNYVGSPTAGIATAITNYFTGLQTVANNAADPSARQTAMSNAQTLASQLVAAGQQYSQLRQSVNSQLTDTVTQINSYTSQIAQLNEQIASASSQGQPPNQLLDQRDLAVSKLSQLAGVQVVQSNGNYSVFLSGGQPLVVGNASYQLATVASPSDPSELTIVSKGVAGSAQPGPTQYLPDVSLTGGALGGLLAFRSQTLDPAQAQLGALAVSFASQVNAQNALGVDMSGNPGGSLFAVGAPAVYANQNNTGSATLSVSFVDGTQPTTSDYALSYDGAKYTLTDRATGSVVGTATPSSTPPTMTI…	667	BPSL0280
BKP2_00461	QFTIGANKGTNDGRNALAL	BPSL0280	553	MSNTLMNLGVSGLNAALWGLTTTGQNISNAATPGYSVERPVYAEASGQYTSSGYLPQGVSTVTVERQYNQYLSNQLNAAQTQGSSLSTYYTLVAQLNNYVGSPTAGIATAITNYFTGLQTVANNAADPSARQTAMSNAQTLASQLVAAGQQYSQLRQSVNSQLTDTVTQINSYTSQIAQLNEQIASASSQGQPPNQLLDQRDLAVSKLSQLAGVQVVQSNGNYSVFLSGGQPLVVGNASYQLATVASPSDPSELTIVSKGVAGSAQPGPTQYLPDVSLTGGALGGLLAFRSQTLDPAQAQLGALAVSFASQVNAQNALGVDMSGNPGGSLFAVGAPAVYANQNNTGSATLSVSFVDGTQPTTSDYALSYDGAKYTLTDRATGSVVGTATPSSTPPTMTI…	667	BPSL0280
BKP2_00462	TIGANKGTNDGRNALALSQ	BPSL0280	555	MSNTLMNLGVSGLNAALWGLTTTGQNISNAATPGYSVERPVYAEASGQYTSSGYLPQGVSTVTVERQYNQYLSNQLNAAQTQGSSLSTYYTLVAQLNNYVGSPTAGIATAITNYFTGLQTVANNAADPSARQTAMSNAQTLASQLVAAGQQYSQLRQSVNSQLTDTVTQINSYTSQIAQLNEQIASASSQGQPPNQLLDQRDLAVSKLSQLAGVQVVQSNGNYSVFLSGGQPLVVGNASYQLATVASPSDPSELTIVSKGVAGSAQPGPTQYLPDVSLTGGALGGLLAFRSQTLDPAQAQLGALAVSFASQVNAQNALGVDMSGNPGGSLFAVGAPAVYANQNNTGSATLSVSFVDGTQPTTSDYALSYDGAKYTLTDRATGSVVGTATPSSTPPTMTI…	667	BPSL0280
BKP2_00463	GANKGTNDGRNALALSQLV	BPSL0280	557	MSNTLMNLGVSGLNAALWGLTTTGQNISNAATPGYSVERPVYAEASGQYTSSGYLPQGVSTVTVERQYNQYLSNQLNAAQTQGSSLSTYYTLVAQLNNYVGSPTAGIATAITNYFTGLQTVANNAADPSARQTAMSNAQTLASQLVAAGQQYSQLRQSVNSQLTDTVTQINSYTSQIAQLNEQIASASSQGQPPNQLLDQRDLAVSKLSQLAGVQVVQSNGNYSVFLSGGQPLVVGNASYQLATVASPSDPSELTIVSKGVAGSAQPGPTQYLPDVSLTGGALGGLLAFRSQTLDPAQAQLGALAVSFASQVNAQNALGVDMSGNPGGSLFAVGAPAVYANQNNTGSATLSVSFVDGTQPTTSDYALSYDGAKYTLTDRATGSVVGTATPSSTPPTMTI…	667	BPSL0280
BKP2_00464	NKGTNDGRNALALSQLVNS	BPSL0280	559	MSNTLMNLGVSGLNAALWGLTTTGQNISNAATPGYSVERPVYAEASGQYTSSGYLPQGVSTVTVERQYNQYLSNQLNAAQTQGSSLSTYYTLVAQLNNYVGSPTAGIATAITNYFTGLQTVANNAADPSARQTAMSNAQTLASQLVAAGQQYSQLRQSVNSQLTDTVTQINSYTSQIAQLNEQIASASSQGQPPNQLLDQRDLAVSKLSQLAGVQVVQSNGNYSVFLSGGQPLVVGNASYQLATVASPSDPSELTIVSKGVAGSAQPGPTQYLPDVSLTGGALGGLLAFRSQTLDPAQAQLGALAVSFASQVNAQNALGVDMSGNPGGSLFAVGAPAVYANQNNTGSATLSVSFVDGTQPTTSDYALSYDGAKYTLTDRATGSVVGTATPSSTPPTMTI…	667	BPSL0280
BKP2_00465	GTNDGRNALALSQLVNSKT	BPSL0280	561	MSNTLMNLGVSGLNAALWGLTTTGQNISNAATPGYSVERPVYAEASGQYTSSGYLPQGVSTVTVERQYNQYLSNQLNAAQTQGSSLSTYYTLVAQLNNYVGSPTAGIATAITNYFTGLQTVANNAADPSARQTAMSNAQTLASQLVAAGQQYSQLRQSVNSQLTDTVTQINSYTSQIAQLNEQIASASSQGQPPNQLLDQRDLAVSKLSQLAGVQVVQSNGNYSVFLSGGQPLVVGNASYQLATVASPSDPSELTIVSKGVAGSAQPGPTQYLPDVSLTGGALGGLLAFRSQTLDPAQAQLGALAVSFASQVNAQNALGVDMSGNPGGSLFAVGAPAVYANQNNTGSATLSVSFVDGTQPTTSDYALSYDGAKYTLTDRATGSVVGTATPSSTPPTMTI…	667	BPSL0280
BKP2_00466	NDGRNALALSQLVNSKTMN	BPSL0280	563	MSNTLMNLGVSGLNAALWGLTTTGQNISNAATPGYSVERPVYAEASGQYTSSGYLPQGVSTVTVERQYNQYLSNQLNAAQTQGSSLSTYYTLVAQLNNYVGSPTAGIATAITNYFTGLQTVANNAADPSARQTAMSNAQTLASQLVAAGQQYSQLRQSVNSQLTDTVTQINSYTSQIAQLNEQIASASSQGQPPNQLLDQRDLAVSKLSQLAGVQVVQSNGNYSVFLSGGQPLVVGNASYQLATVASPSDPSELTIVSKGVAGSAQPGPTQYLPDVSLTGGALGGLLAFRSQTLDPAQAQLGALAVSFASQVNAQNALGVDMSGNPGGSLFAVGAPAVYANQNNTGSATLSVSFVDGTQPTTSDYALSYDGAKYTLTDRATGSVVGTATPSSTPPTMTI…	667	BPSL0280
BKP2_00467	GRNALALSQLVNSKTMNNG	BPSL0280	565	MSNTLMNLGVSGLNAALWGLTTTGQNISNAATPGYSVERPVYAEASGQYTSSGYLPQGVSTVTVERQYNQYLSNQLNAAQTQGSSLSTYYTLVAQLNNYVGSPTAGIATAITNYFTGLQTVANNAADPSARQTAMSNAQTLASQLVAAGQQYSQLRQSVNSQLTDTVTQINSYTSQIAQLNEQIASASSQGQPPNQLLDQRDLAVSKLSQLAGVQVVQSNGNYSVFLSGGQPLVVGNASYQLATVASPSDPSELTIVSKGVAGSAQPGPTQYLPDVSLTGGALGGLLAFRSQTLDPAQAQLGALAVSFASQVNAQNALGVDMSGNPGGSLFAVGAPAVYANQNNTGSATLSVSFVDGTQPTTSDYALSYDGAKYTLTDRATGSVVGTATPSSTPPTMTI…	667	BPSL0280
BKP2_00468	NALALSQLVNSKTMNNGTT	BPSL0280	567	MSNTLMNLGVSGLNAALWGLTTTGQNISNAATPGYSVERPVYAEASGQYTSSGYLPQGVSTVTVERQYNQYLSNQLNAAQTQGSSLSTYYTLVAQLNNYVGSPTAGIATAITNYFTGLQTVANNAADPSARQTAMSNAQTLASQLVAAGQQYSQLRQSVNSQLTDTVTQINSYTSQIAQLNEQIASASSQGQPPNQLLDQRDLAVSKLSQLAGVQVVQSNGNYSVFLSGGQPLVVGNASYQLATVASPSDPSELTIVSKGVAGSAQPGPTQYLPDVSLTGGALGGLLAFRSQTLDPAQAQLGALAVSFASQVNAQNALGVDMSGNPGGSLFAVGAPAVYANQNNTGSATLSVSFVDGTQPTTSDYALSYDGAKYTLTDRATGSVVGTATPSSTPPTMTI…	667	BPSL0280
BKP2_00469	LALSQLVNSKTMNNGTTTL	BPSL0280	569	MSNTLMNLGVSGLNAALWGLTTTGQNISNAATPGYSVERPVYAEASGQYTSSGYLPQGVSTVTVERQYNQYLSNQLNAAQTQGSSLSTYYTLVAQLNNYVGSPTAGIATAITNYFTGLQTVANNAADPSARQTAMSNAQTLASQLVAAGQQYSQLRQSVNSQLTDTVTQINSYTSQIAQLNEQIASASSQGQPPNQLLDQRDLAVSKLSQLAGVQVVQSNGNYSVFLSGGQPLVVGNASYQLATVASPSDPSELTIVSKGVAGSAQPGPTQYLPDVSLTGGALGGLLAFRSQTLDPAQAQLGALAVSFASQVNAQNALGVDMSGNPGGSLFAVGAPAVYANQNNTGSATLSVSFVDGTQPTTSDYALSYDGAKYTLTDRATGSVVGTATPSSTPPTMTI…	667	BPSL0280
BKP2_00470	LSQLVNSKTMNNGTTTLTG	BPSL0280	571	MSNTLMNLGVSGLNAALWGLTTTGQNISNAATPGYSVERPVYAEASGQYTSSGYLPQGVSTVTVERQYNQYLSNQLNAAQTQGSSLSTYYTLVAQLNNYVGSPTAGIATAITNYFTGLQTVANNAADPSARQTAMSNAQTLASQLVAAGQQYSQLRQSVNSQLTDTVTQINSYTSQIAQLNEQIASASSQGQPPNQLLDQRDLAVSKLSQLAGVQVVQSNGNYSVFLSGGQPLVVGNASYQLATVASPSDPSELTIVSKGVAGSAQPGPTQYLPDVSLTGGALGGLLAFRSQTLDPAQAQLGALAVSFASQVNAQNALGVDMSGNPGGSLFAVGAPAVYANQNNTGSATLSVSFVDGTQPTTSDYALSYDGAKYTLTDRATGSVVGTATPSSTPPTMTI…	667	BPSL0280
BKP2_00471	QLVNSKTMNNGTTTLTGAY	BPSL0280	573	MSNTLMNLGVSGLNAALWGLTTTGQNISNAATPGYSVERPVYAEASGQYTSSGYLPQGVSTVTVERQYNQYLSNQLNAAQTQGSSLSTYYTLVAQLNNYVGSPTAGIATAITNYFTGLQTVANNAADPSARQTAMSNAQTLASQLVAAGQQYSQLRQSVNSQLTDTVTQINSYTSQIAQLNEQIASASSQGQPPNQLLDQRDLAVSKLSQLAGVQVVQSNGNYSVFLSGGQPLVVGNASYQLATVASPSDPSELTIVSKGVAGSAQPGPTQYLPDVSLTGGALGGLLAFRSQTLDPAQAQLGALAVSFASQVNAQNALGVDMSGNPGGSLFAVGAPAVYANQNNTGSATLSVSFVDGTQPTTSDYALSYDGAKYTLTDRATGSVVGTATPSSTPPTMTI…	667	BPSL0280
BKP2_00472	VNSKTMNNGTTTLTGAYAG	BPSL0280	575	MSNTLMNLGVSGLNAALWGLTTTGQNISNAATPGYSVERPVYAEASGQYTSSGYLPQGVSTVTVERQYNQYLSNQLNAAQTQGSSLSTYYTLVAQLNNYVGSPTAGIATAITNYFTGLQTVANNAADPSARQTAMSNAQTLASQLVAAGQQYSQLRQSVNSQLTDTVTQINSYTSQIAQLNEQIASASSQGQPPNQLLDQRDLAVSKLSQLAGVQVVQSNGNYSVFLSGGQPLVVGNASYQLATVASPSDPSELTIVSKGVAGSAQPGPTQYLPDVSLTGGALGGLLAFRSQTLDPAQAQLGALAVSFASQVNAQNALGVDMSGNPGGSLFAVGAPAVYANQNNTGSATLSVSFVDGTQPTTSDYALSYDGAKYTLTDRATGSVVGTATPSSTPPTMTI…	667	BPSL0280
BKP2_00473	SKTMNNGTTTLTGAYAGYV	BPSL0280	577	MSNTLMNLGVSGLNAALWGLTTTGQNISNAATPGYSVERPVYAEASGQYTSSGYLPQGVSTVTVERQYNQYLSNQLNAAQTQGSSLSTYYTLVAQLNNYVGSPTAGIATAITNYFTGLQTVANNAADPSARQTAMSNAQTLASQLVAAGQQYSQLRQSVNSQLTDTVTQINSYTSQIAQLNEQIASASSQGQPPNQLLDQRDLAVSKLSQLAGVQVVQSNGNYSVFLSGGQPLVVGNASYQLATVASPSDPSELTIVSKGVAGSAQPGPTQYLPDVSLTGGALGGLLAFRSQTLDPAQAQLGALAVSFASQVNAQNALGVDMSGNPGGSLFAVGAPAVYANQNNTGSATLSVSFVDGTQPTTSDYALSYDGAKYTLTDRATGSVVGTATPSSTPPTMTI…	667	BPSL0280
BKP2_00474	TMNNGTTTLTGAYAGYVNA	BPSL0280	579	MSNTLMNLGVSGLNAALWGLTTTGQNISNAATPGYSVERPVYAEASGQYTSSGYLPQGVSTVTVERQYNQYLSNQLNAAQTQGSSLSTYYTLVAQLNNYVGSPTAGIATAITNYFTGLQTVANNAADPSARQTAMSNAQTLASQLVAAGQQYSQLRQSVNSQLTDTVTQINSYTSQIAQLNEQIASASSQGQPPNQLLDQRDLAVSKLSQLAGVQVVQSNGNYSVFLSGGQPLVVGNASYQLATVASPSDPSELTIVSKGVAGSAQPGPTQYLPDVSLTGGALGGLLAFRSQTLDPAQAQLGALAVSFASQVNAQNALGVDMSGNPGGSLFAVGAPAVYANQNNTGSATLSVSFVDGTQPTTSDYALSYDGAKYTLTDRATGSVVGTATPSSTPPTMTI…	667	BPSL0280
BKP2_00475	NNGTTTLTGAYAGYVNAIG	BPSL0280	581	MSNTLMNLGVSGLNAALWGLTTTGQNISNAATPGYSVERPVYAEASGQYTSSGYLPQGVSTVTVERQYNQYLSNQLNAAQTQGSSLSTYYTLVAQLNNYVGSPTAGIATAITNYFTGLQTVANNAADPSARQTAMSNAQTLASQLVAAGQQYSQLRQSVNSQLTDTVTQINSYTSQIAQLNEQIASASSQGQPPNQLLDQRDLAVSKLSQLAGVQVVQSNGNYSVFLSGGQPLVVGNASYQLATVASPSDPSELTIVSKGVAGSAQPGPTQYLPDVSLTGGALGGLLAFRSQTLDPAQAQLGALAVSFASQVNAQNALGVDMSGNPGGSLFAVGAPAVYANQNNTGSATLSVSFVDGTQPTTSDYALSYDGAKYTLTDRATGSVVGTATPSSTPPTMTI…	667	BPSL0280
BKP2_00476	GTTTLTGAYAGYVNAIGNA	BPSL0280	583	MSNTLMNLGVSGLNAALWGLTTTGQNISNAATPGYSVERPVYAEASGQYTSSGYLPQGVSTVTVERQYNQYLSNQLNAAQTQGSSLSTYYTLVAQLNNYVGSPTAGIATAITNYFTGLQTVANNAADPSARQTAMSNAQTLASQLVAAGQQYSQLRQSVNSQLTDTVTQINSYTSQIAQLNEQIASASSQGQPPNQLLDQRDLAVSKLSQLAGVQVVQSNGNYSVFLSGGQPLVVGNASYQLATVASPSDPSELTIVSKGVAGSAQPGPTQYLPDVSLTGGALGGLLAFRSQTLDPAQAQLGALAVSFASQVNAQNALGVDMSGNPGGSLFAVGAPAVYANQNNTGSATLSVSFVDGTQPTTSDYALSYDGAKYTLTDRATGSVVGTATPSSTPPTMTI…	667	BPSL0280
BKP2_00477	TTLTGAYAGYVNAIGNAAS	BPSL0280	585	MSNTLMNLGVSGLNAALWGLTTTGQNISNAATPGYSVERPVYAEASGQYTSSGYLPQGVSTVTVERQYNQYLSNQLNAAQTQGSSLSTYYTLVAQLNNYVGSPTAGIATAITNYFTGLQTVANNAADPSARQTAMSNAQTLASQLVAAGQQYSQLRQSVNSQLTDTVTQINSYTSQIAQLNEQIASASSQGQPPNQLLDQRDLAVSKLSQLAGVQVVQSNGNYSVFLSGGQPLVVGNASYQLATVASPSDPSELTIVSKGVAGSAQPGPTQYLPDVSLTGGALGGLLAFRSQTLDPAQAQLGALAVSFASQVNAQNALGVDMSGNPGGSLFAVGAPAVYANQNNTGSATLSVSFVDGTQPTTSDYALSYDGAKYTLTDRATGSVVGTATPSSTPPTMTI…	667	BPSL0280
BKP2_00478	LTGAYAGYVNAIGNAASQL	BPSL0280	587	MSNTLMNLGVSGLNAALWGLTTTGQNISNAATPGYSVERPVYAEASGQYTSSGYLPQGVSTVTVERQYNQYLSNQLNAAQTQGSSLSTYYTLVAQLNNYVGSPTAGIATAITNYFTGLQTVANNAADPSARQTAMSNAQTLASQLVAAGQQYSQLRQSVNSQLTDTVTQINSYTSQIAQLNEQIASASSQGQPPNQLLDQRDLAVSKLSQLAGVQVVQSNGNYSVFLSGGQPLVVGNASYQLATVASPSDPSELTIVSKGVAGSAQPGPTQYLPDVSLTGGALGGLLAFRSQTLDPAQAQLGALAVSFASQVNAQNALGVDMSGNPGGSLFAVGAPAVYANQNNTGSATLSVSFVDGTQPTTSDYALSYDGAKYTLTDRATGSVVGTATPSSTPPTMTI…	667	BPSL0280
BKP2_00479	GAYAGYVNAIGNAASQLKA	BPSL0280	589	MSNTLMNLGVSGLNAALWGLTTTGQNISNAATPGYSVERPVYAEASGQYTSSGYLPQGVSTVTVERQYNQYLSNQLNAAQTQGSSLSTYYTLVAQLNNYVGSPTAGIATAITNYFTGLQTVANNAADPSARQTAMSNAQTLASQLVAAGQQYSQLRQSVNSQLTDTVTQINSYTSQIAQLNEQIASASSQGQPPNQLLDQRDLAVSKLSQLAGVQVVQSNGNYSVFLSGGQPLVVGNASYQLATVASPSDPSELTIVSKGVAGSAQPGPTQYLPDVSLTGGALGGLLAFRSQTLDPAQAQLGALAVSFASQVNAQNALGVDMSGNPGGSLFAVGAPAVYANQNNTGSATLSVSFVDGTQPTTSDYALSYDGAKYTLTDRATGSVVGTATPSSTPPTMTI…	667	BPSL0280
BKP2_00480	YAGYVNAIGNAASQLKASS	BPSL0280	591	MSNTLMNLGVSGLNAALWGLTTTGQNISNAATPGYSVERPVYAEASGQYTSSGYLPQGVSTVTVERQYNQYLSNQLNAAQTQGSSLSTYYTLVAQLNNYVGSPTAGIATAITNYFTGLQTVANNAADPSARQTAMSNAQTLASQLVAAGQQYSQLRQSVNSQLTDTVTQINSYTSQIAQLNEQIASASSQGQPPNQLLDQRDLAVSKLSQLAGVQVVQSNGNYSVFLSGGQPLVVGNASYQLATVASPSDPSELTIVSKGVAGSAQPGPTQYLPDVSLTGGALGGLLAFRSQTLDPAQAQLGALAVSFASQVNAQNALGVDMSGNPGGSLFAVGAPAVYANQNNTGSATLSVSFVDGTQPTTSDYALSYDGAKYTLTDRATGSVVGTATPSSTPPTMTI…	667	BPSL0280
BKP2_00481	GYVNAIGNAASQLKASSAA	BPSL0280	593	MSNTLMNLGVSGLNAALWGLTTTGQNISNAATPGYSVERPVYAEASGQYTSSGYLPQGVSTVTVERQYNQYLSNQLNAAQTQGSSLSTYYTLVAQLNNYVGSPTAGIATAITNYFTGLQTVANNAADPSARQTAMSNAQTLASQLVAAGQQYSQLRQSVNSQLTDTVTQINSYTSQIAQLNEQIASASSQGQPPNQLLDQRDLAVSKLSQLAGVQVVQSNGNYSVFLSGGQPLVVGNASYQLATVASPSDPSELTIVSKGVAGSAQPGPTQYLPDVSLTGGALGGLLAFRSQTLDPAQAQLGALAVSFASQVNAQNALGVDMSGNPGGSLFAVGAPAVYANQNNTGSATLSVSFVDGTQPTTSDYALSYDGAKYTLTDRATGSVVGTATPSSTPPTMTI…	667	BPSL0280
BKP2_00482	VNAIGNAASQLKASSAAQT	BPSL0280	595	MSNTLMNLGVSGLNAALWGLTTTGQNISNAATPGYSVERPVYAEASGQYTSSGYLPQGVSTVTVERQYNQYLSNQLNAAQTQGSSLSTYYTLVAQLNNYVGSPTAGIATAITNYFTGLQTVANNAADPSARQTAMSNAQTLASQLVAAGQQYSQLRQSVNSQLTDTVTQINSYTSQIAQLNEQIASASSQGQPPNQLLDQRDLAVSKLSQLAGVQVVQSNGNYSVFLSGGQPLVVGNASYQLATVASPSDPSELTIVSKGVAGSAQPGPTQYLPDVSLTGGALGGLLAFRSQTLDPAQAQLGALAVSFASQVNAQNALGVDMSGNPGGSLFAVGAPAVYANQNNTGSATLSVSFVDGTQPTTSDYALSYDGAKYTLTDRATGSVVGTATPSSTPPTMTI…	667	BPSL0280
BKP2_00483	AIGNAASQLKASSAAQTAL	BPSL0280	597	MSNTLMNLGVSGLNAALWGLTTTGQNISNAATPGYSVERPVYAEASGQYTSSGYLPQGVSTVTVERQYNQYLSNQLNAAQTQGSSLSTYYTLVAQLNNYVGSPTAGIATAITNYFTGLQTVANNAADPSARQTAMSNAQTLASQLVAAGQQYSQLRQSVNSQLTDTVTQINSYTSQIAQLNEQIASASSQGQPPNQLLDQRDLAVSKLSQLAGVQVVQSNGNYSVFLSGGQPLVVGNASYQLATVASPSDPSELTIVSKGVAGSAQPGPTQYLPDVSLTGGALGGLLAFRSQTLDPAQAQLGALAVSFASQVNAQNALGVDMSGNPGGSLFAVGAPAVYANQNNTGSATLSVSFVDGTQPTTSDYALSYDGAKYTLTDRATGSVVGTATPSSTPPTMTI…	667	BPSL0280
BKP2_00484	GNAASQLKASSAAQTALVG	BPSL0280	599	MSNTLMNLGVSGLNAALWGLTTTGQNISNAATPGYSVERPVYAEASGQYTSSGYLPQGVSTVTVERQYNQYLSNQLNAAQTQGSSLSTYYTLVAQLNNYVGSPTAGIATAITNYFTGLQTVANNAADPSARQTAMSNAQTLASQLVAAGQQYSQLRQSVNSQLTDTVTQINSYTSQIAQLNEQIASASSQGQPPNQLLDQRDLAVSKLSQLAGVQVVQSNGNYSVFLSGGQPLVVGNASYQLATVASPSDPSELTIVSKGVAGSAQPGPTQYLPDVSLTGGALGGLLAFRSQTLDPAQAQLGALAVSFASQVNAQNALGVDMSGNPGGSLFAVGAPAVYANQNNTGSATLSVSFVDGTQPTTSDYALSYDGAKYTLTDRATGSVVGTATPSSTPPTMTI…	667	BPSL0280
BKP2_00485	AASQLKASSAAQTALVGQI	BPSL0280	601	MSNTLMNLGVSGLNAALWGLTTTGQNISNAATPGYSVERPVYAEASGQYTSSGYLPQGVSTVTVERQYNQYLSNQLNAAQTQGSSLSTYYTLVAQLNNYVGSPTAGIATAITNYFTGLQTVANNAADPSARQTAMSNAQTLASQLVAAGQQYSQLRQSVNSQLTDTVTQINSYTSQIAQLNEQIASASSQGQPPNQLLDQRDLAVSKLSQLAGVQVVQSNGNYSVFLSGGQPLVVGNASYQLATVASPSDPSELTIVSKGVAGSAQPGPTQYLPDVSLTGGALGGLLAFRSQTLDPAQAQLGALAVSFASQVNAQNALGVDMSGNPGGSLFAVGAPAVYANQNNTGSATLSVSFVDGTQPTTSDYALSYDGAKYTLTDRATGSVVGTATPSSTPPTMTI…	667	BPSL0280
BKP2_00486	SQLKASSAAQTALVGQITQ	BPSL0280	603	MSNTLMNLGVSGLNAALWGLTTTGQNISNAATPGYSVERPVYAEASGQYTSSGYLPQGVSTVTVERQYNQYLSNQLNAAQTQGSSLSTYYTLVAQLNNYVGSPTAGIATAITNYFTGLQTVANNAADPSARQTAMSNAQTLASQLVAAGQQYSQLRQSVNSQLTDTVTQINSYTSQIAQLNEQIASASSQGQPPNQLLDQRDLAVSKLSQLAGVQVVQSNGNYSVFLSGGQPLVVGNASYQLATVASPSDPSELTIVSKGVAGSAQPGPTQYLPDVSLTGGALGGLLAFRSQTLDPAQAQLGALAVSFASQVNAQNALGVDMSGNPGGSLFAVGAPAVYANQNNTGSATLSVSFVDGTQPTTSDYALSYDGAKYTLTDRATGSVVGTATPSSTPPTMTI…	667	BPSL0280
BKP2_00487	LKASSAAQTALVGQITQAQ	BPSL0280	605	MSNTLMNLGVSGLNAALWGLTTTGQNISNAATPGYSVERPVYAEASGQYTSSGYLPQGVSTVTVERQYNQYLSNQLNAAQTQGSSLSTYYTLVAQLNNYVGSPTAGIATAITNYFTGLQTVANNAADPSARQTAMSNAQTLASQLVAAGQQYSQLRQSVNSQLTDTVTQINSYTSQIAQLNEQIASASSQGQPPNQLLDQRDLAVSKLSQLAGVQVVQSNGNYSVFLSGGQPLVVGNASYQLATVASPSDPSELTIVSKGVAGSAQPGPTQYLPDVSLTGGALGGLLAFRSQTLDPAQAQLGALAVSFASQVNAQNALGVDMSGNPGGSLFAVGAPAVYANQNNTGSATLSVSFVDGTQPTTSDYALSYDGAKYTLTDRATGSVVGTATPSSTPPTMTI…	667	BPSL0280
BKP2_00488	ASSAAQTALVGQITQAQQS	BPSL0280	607	MSNTLMNLGVSGLNAALWGLTTTGQNISNAATPGYSVERPVYAEASGQYTSSGYLPQGVSTVTVERQYNQYLSNQLNAAQTQGSSLSTYYTLVAQLNNYVGSPTAGIATAITNYFTGLQTVANNAADPSARQTAMSNAQTLASQLVAAGQQYSQLRQSVNSQLTDTVTQINSYTSQIAQLNEQIASASSQGQPPNQLLDQRDLAVSKLSQLAGVQVVQSNGNYSVFLSGGQPLVVGNASYQLATVASPSDPSELTIVSKGVAGSAQPGPTQYLPDVSLTGGALGGLLAFRSQTLDPAQAQLGALAVSFASQVNAQNALGVDMSGNPGGSLFAVGAPAVYANQNNTGSATLSVSFVDGTQPTTSDYALSYDGAKYTLTDRATGSVVGTATPSSTPPTMTI…	667	BPSL0280
BKP2_00489	SAAQTALVGQITQAQQSVS	BPSL0280	609	MSNTLMNLGVSGLNAALWGLTTTGQNISNAATPGYSVERPVYAEASGQYTSSGYLPQGVSTVTVERQYNQYLSNQLNAAQTQGSSLSTYYTLVAQLNNYVGSPTAGIATAITNYFTGLQTVANNAADPSARQTAMSNAQTLASQLVAAGQQYSQLRQSVNSQLTDTVTQINSYTSQIAQLNEQIASASSQGQPPNQLLDQRDLAVSKLSQLAGVQVVQSNGNYSVFLSGGQPLVVGNASYQLATVASPSDPSELTIVSKGVAGSAQPGPTQYLPDVSLTGGALGGLLAFRSQTLDPAQAQLGALAVSFASQVNAQNALGVDMSGNPGGSLFAVGAPAVYANQNNTGSATLSVSFVDGTQPTTSDYALSYDGAKYTLTDRATGSVVGTATPSSTPPTMTI…	667	BPSL0280
BKP2_00490	AQTALVGQITQAQQSVSGV	BPSL0280	611	MSNTLMNLGVSGLNAALWGLTTTGQNISNAATPGYSVERPVYAEASGQYTSSGYLPQGVSTVTVERQYNQYLSNQLNAAQTQGSSLSTYYTLVAQLNNYVGSPTAGIATAITNYFTGLQTVANNAADPSARQTAMSNAQTLASQLVAAGQQYSQLRQSVNSQLTDTVTQINSYTSQIAQLNEQIASASSQGQPPNQLLDQRDLAVSKLSQLAGVQVVQSNGNYSVFLSGGQPLVVGNASYQLATVASPSDPSELTIVSKGVAGSAQPGPTQYLPDVSLTGGALGGLLAFRSQTLDPAQAQLGALAVSFASQVNAQNALGVDMSGNPGGSLFAVGAPAVYANQNNTGSATLSVSFVDGTQPTTSDYALSYDGAKYTLTDRATGSVVGTATPSSTPPTMTI…	667	BPSL0280
BKP2_00491	TALVGQITQAQQSVSGVNQ	BPSL0280	613	MSNTLMNLGVSGLNAALWGLTTTGQNISNAATPGYSVERPVYAEASGQYTSSGYLPQGVSTVTVERQYNQYLSNQLNAAQTQGSSLSTYYTLVAQLNNYVGSPTAGIATAITNYFTGLQTVANNAADPSARQTAMSNAQTLASQLVAAGQQYSQLRQSVNSQLTDTVTQINSYTSQIAQLNEQIASASSQGQPPNQLLDQRDLAVSKLSQLAGVQVVQSNGNYSVFLSGGQPLVVGNASYQLATVASPSDPSELTIVSKGVAGSAQPGPTQYLPDVSLTGGALGGLLAFRSQTLDPAQAQLGALAVSFASQVNAQNALGVDMSGNPGGSLFAVGAPAVYANQNNTGSATLSVSFVDGTQPTTSDYALSYDGAKYTLTDRATGSVVGTATPSSTPPTMTI…	667	BPSL0280
BKP2_00492	LVGQITQAQQSVSGVNQNE	BPSL0280	615	MSNTLMNLGVSGLNAALWGLTTTGQNISNAATPGYSVERPVYAEASGQYTSSGYLPQGVSTVTVERQYNQYLSNQLNAAQTQGSSLSTYYTLVAQLNNYVGSPTAGIATAITNYFTGLQTVANNAADPSARQTAMSNAQTLASQLVAAGQQYSQLRQSVNSQLTDTVTQINSYTSQIAQLNEQIASASSQGQPPNQLLDQRDLAVSKLSQLAGVQVVQSNGNYSVFLSGGQPLVVGNASYQLATVASPSDPSELTIVSKGVAGSAQPGPTQYLPDVSLTGGALGGLLAFRSQTLDPAQAQLGALAVSFASQVNAQNALGVDMSGNPGGSLFAVGAPAVYANQNNTGSATLSVSFVDGTQPTTSDYALSYDGAKYTLTDRATGSVVGTATPSSTPPTMTI…	667	BPSL0280
BKP2_00493	GQITQAQQSVSGVNQNEEA	BPSL0280	617	MSNTLMNLGVSGLNAALWGLTTTGQNISNAATPGYSVERPVYAEASGQYTSSGYLPQGVSTVTVERQYNQYLSNQLNAAQTQGSSLSTYYTLVAQLNNYVGSPTAGIATAITNYFTGLQTVANNAADPSARQTAMSNAQTLASQLVAAGQQYSQLRQSVNSQLTDTVTQINSYTSQIAQLNEQIASASSQGQPPNQLLDQRDLAVSKLSQLAGVQVVQSNGNYSVFLSGGQPLVVGNASYQLATVASPSDPSELTIVSKGVAGSAQPGPTQYLPDVSLTGGALGGLLAFRSQTLDPAQAQLGALAVSFASQVNAQNALGVDMSGNPGGSLFAVGAPAVYANQNNTGSATLSVSFVDGTQPTTSDYALSYDGAKYTLTDRATGSVVGTATPSSTPPTMTI…	667	BPSL0280
BKP2_00494	ITQAQQSVSGVNQNEEAAN	BPSL0280	619	MSNTLMNLGVSGLNAALWGLTTTGQNISNAATPGYSVERPVYAEASGQYTSSGYLPQGVSTVTVERQYNQYLSNQLNAAQTQGSSLSTYYTLVAQLNNYVGSPTAGIATAITNYFTGLQTVANNAADPSARQTAMSNAQTLASQLVAAGQQYSQLRQSVNSQLTDTVTQINSYTSQIAQLNEQIASASSQGQPPNQLLDQRDLAVSKLSQLAGVQVVQSNGNYSVFLSGGQPLVVGNASYQLATVASPSDPSELTIVSKGVAGSAQPGPTQYLPDVSLTGGALGGLLAFRSQTLDPAQAQLGALAVSFASQVNAQNALGVDMSGNPGGSLFAVGAPAVYANQNNTGSATLSVSFVDGTQPTTSDYALSYDGAKYTLTDRATGSVVGTATPSSTPPTMTI…	667	BPSL0280
BKP2_00495	QAQQSVSGVNQNEEAANLM	BPSL0280	621	MSNTLMNLGVSGLNAALWGLTTTGQNISNAATPGYSVERPVYAEASGQYTSSGYLPQGVSTVTVERQYNQYLSNQLNAAQTQGSSLSTYYTLVAQLNNYVGSPTAGIATAITNYFTGLQTVANNAADPSARQTAMSNAQTLASQLVAAGQQYSQLRQSVNSQLTDTVTQINSYTSQIAQLNEQIASASSQGQPPNQLLDQRDLAVSKLSQLAGVQVVQSNGNYSVFLSGGQPLVVGNASYQLATVASPSDPSELTIVSKGVAGSAQPGPTQYLPDVSLTGGALGGLLAFRSQTLDPAQAQLGALAVSFASQVNAQNALGVDMSGNPGGSLFAVGAPAVYANQNNTGSATLSVSFVDGTQPTTSDYALSYDGAKYTLTDRATGSVVGTATPSSTPPTMTI…	667	BPSL0280
BKP2_00496	QQSVSGVNQNEEAANLMQY	BPSL0280	623	MSNTLMNLGVSGLNAALWGLTTTGQNISNAATPGYSVERPVYAEASGQYTSSGYLPQGVSTVTVERQYNQYLSNQLNAAQTQGSSLSTYYTLVAQLNNYVGSPTAGIATAITNYFTGLQTVANNAADPSARQTAMSNAQTLASQLVAAGQQYSQLRQSVNSQLTDTVTQINSYTSQIAQLNEQIASASSQGQPPNQLLDQRDLAVSKLSQLAGVQVVQSNGNYSVFLSGGQPLVVGNASYQLATVASPSDPSELTIVSKGVAGSAQPGPTQYLPDVSLTGGALGGLLAFRSQTLDPAQAQLGALAVSFASQVNAQNALGVDMSGNPGGSLFAVGAPAVYANQNNTGSATLSVSFVDGTQPTTSDYALSYDGAKYTLTDRATGSVVGTATPSSTPPTMTI…	667	BPSL0280
BKP2_00497	SVSGVNQNEEAANLMQYQQ	BPSL0280	625	MSNTLMNLGVSGLNAALWGLTTTGQNISNAATPGYSVERPVYAEASGQYTSSGYLPQGVSTVTVERQYNQYLSNQLNAAQTQGSSLSTYYTLVAQLNNYVGSPTAGIATAITNYFTGLQTVANNAADPSARQTAMSNAQTLASQLVAAGQQYSQLRQSVNSQLTDTVTQINSYTSQIAQLNEQIASASSQGQPPNQLLDQRDLAVSKLSQLAGVQVVQSNGNYSVFLSGGQPLVVGNASYQLATVASPSDPSELTIVSKGVAGSAQPGPTQYLPDVSLTGGALGGLLAFRSQTLDPAQAQLGALAVSFASQVNAQNALGVDMSGNPGGSLFAVGAPAVYANQNNTGSATLSVSFVDGTQPTTSDYALSYDGAKYTLTDRATGSVVGTATPSSTPPTMTI…	667	BPSL0280
BKP2_00498	SGVNQNEEAANLMQYQQLY	BPSL0280	627	MSNTLMNLGVSGLNAALWGLTTTGQNISNAATPGYSVERPVYAEASGQYTSSGYLPQGVSTVTVERQYNQYLSNQLNAAQTQGSSLSTYYTLVAQLNNYVGSPTAGIATAITNYFTGLQTVANNAADPSARQTAMSNAQTLASQLVAAGQQYSQLRQSVNSQLTDTVTQINSYTSQIAQLNEQIASASSQGQPPNQLLDQRDLAVSKLSQLAGVQVVQSNGNYSVFLSGGQPLVVGNASYQLATVASPSDPSELTIVSKGVAGSAQPGPTQYLPDVSLTGGALGGLLAFRSQTLDPAQAQLGALAVSFASQVNAQNALGVDMSGNPGGSLFAVGAPAVYANQNNTGSATLSVSFVDGTQPTTSDYALSYDGAKYTLTDRATGSVVGTATPSSTPPTMTI…	667	BPSL0280
BKP2_00499	VNQNEEAANLMQYQQLYQA	BPSL0280	629	MSNTLMNLGVSGLNAALWGLTTTGQNISNAATPGYSVERPVYAEASGQYTSSGYLPQGVSTVTVERQYNQYLSNQLNAAQTQGSSLSTYYTLVAQLNNYVGSPTAGIATAITNYFTGLQTVANNAADPSARQTAMSNAQTLASQLVAAGQQYSQLRQSVNSQLTDTVTQINSYTSQIAQLNEQIASASSQGQPPNQLLDQRDLAVSKLSQLAGVQVVQSNGNYSVFLSGGQPLVVGNASYQLATVASPSDPSELTIVSKGVAGSAQPGPTQYLPDVSLTGGALGGLLAFRSQTLDPAQAQLGALAVSFASQVNAQNALGVDMSGNPGGSLFAVGAPAVYANQNNTGSATLSVSFVDGTQPTTSDYALSYDGAKYTLTDRATGSVVGTATPSSTPPTMTI…	667	BPSL0280
BKP2_00500	QNEEAANLMQYQQLYQANA	BPSL0280	631	MSNTLMNLGVSGLNAALWGLTTTGQNISNAATPGYSVERPVYAEASGQYTSSGYLPQGVSTVTVERQYNQYLSNQLNAAQTQGSSLSTYYTLVAQLNNYVGSPTAGIATAITNYFTGLQTVANNAADPSARQTAMSNAQTLASQLVAAGQQYSQLRQSVNSQLTDTVTQINSYTSQIAQLNEQIASASSQGQPPNQLLDQRDLAVSKLSQLAGVQVVQSNGNYSVFLSGGQPLVVGNASYQLATVASPSDPSELTIVSKGVAGSAQPGPTQYLPDVSLTGGALGGLLAFRSQTLDPAQAQLGALAVSFASQVNAQNALGVDMSGNPGGSLFAVGAPAVYANQNNTGSATLSVSFVDGTQPTTSDYALSYDGAKYTLTDRATGSVVGTATPSSTPPTMTI…	667	BPSL0280
BKP2_00501	EEAANLMQYQQLYQANAKV	BPSL0280	633	MSNTLMNLGVSGLNAALWGLTTTGQNISNAATPGYSVERPVYAEASGQYTSSGYLPQGVSTVTVERQYNQYLSNQLNAAQTQGSSLSTYYTLVAQLNNYVGSPTAGIATAITNYFTGLQTVANNAADPSARQTAMSNAQTLASQLVAAGQQYSQLRQSVNSQLTDTVTQINSYTSQIAQLNEQIASASSQGQPPNQLLDQRDLAVSKLSQLAGVQVVQSNGNYSVFLSGGQPLVVGNASYQLATVASPSDPSELTIVSKGVAGSAQPGPTQYLPDVSLTGGALGGLLAFRSQTLDPAQAQLGALAVSFASQVNAQNALGVDMSGNPGGSLFAVGAPAVYANQNNTGSATLSVSFVDGTQPTTSDYALSYDGAKYTLTDRATGSVVGTATPSSTPPTMTI…	667	BPSL0280
BKP2_00502	AANLMQYQQLYQANAKVIQ	BPSL0280	635	MSNTLMNLGVSGLNAALWGLTTTGQNISNAATPGYSVERPVYAEASGQYTSSGYLPQGVSTVTVERQYNQYLSNQLNAAQTQGSSLSTYYTLVAQLNNYVGSPTAGIATAITNYFTGLQTVANNAADPSARQTAMSNAQTLASQLVAAGQQYSQLRQSVNSQLTDTVTQINSYTSQIAQLNEQIASASSQGQPPNQLLDQRDLAVSKLSQLAGVQVVQSNGNYSVFLSGGQPLVVGNASYQLATVASPSDPSELTIVSKGVAGSAQPGPTQYLPDVSLTGGALGGLLAFRSQTLDPAQAQLGALAVSFASQVNAQNALGVDMSGNPGGSLFAVGAPAVYANQNNTGSATLSVSFVDGTQPTTSDYALSYDGAKYTLTDRATGSVVGTATPSSTPPTMTI…	667	BPSL0280
BKP2_00503	NLMQYQQLYQANAKVIQTA	BPSL0280	637	MSNTLMNLGVSGLNAALWGLTTTGQNISNAATPGYSVERPVYAEASGQYTSSGYLPQGVSTVTVERQYNQYLSNQLNAAQTQGSSLSTYYTLVAQLNNYVGSPTAGIATAITNYFTGLQTVANNAADPSARQTAMSNAQTLASQLVAAGQQYSQLRQSVNSQLTDTVTQINSYTSQIAQLNEQIASASSQGQPPNQLLDQRDLAVSKLSQLAGVQVVQSNGNYSVFLSGGQPLVVGNASYQLATVASPSDPSELTIVSKGVAGSAQPGPTQYLPDVSLTGGALGGLLAFRSQTLDPAQAQLGALAVSFASQVNAQNALGVDMSGNPGGSLFAVGAPAVYANQNNTGSATLSVSFVDGTQPTTSDYALSYDGAKYTLTDRATGSVVGTATPSSTPPTMTI…	667	BPSL0280
BKP2_00504	MQYQQLYQANAKVIQTANS	BPSL0280	639	MSNTLMNLGVSGLNAALWGLTTTGQNISNAATPGYSVERPVYAEASGQYTSSGYLPQGVSTVTVERQYNQYLSNQLNAAQTQGSSLSTYYTLVAQLNNYVGSPTAGIATAITNYFTGLQTVANNAADPSARQTAMSNAQTLASQLVAAGQQYSQLRQSVNSQLTDTVTQINSYTSQIAQLNEQIASASSQGQPPNQLLDQRDLAVSKLSQLAGVQVVQSNGNYSVFLSGGQPLVVGNASYQLATVASPSDPSELTIVSKGVAGSAQPGPTQYLPDVSLTGGALGGLLAFRSQTLDPAQAQLGALAVSFASQVNAQNALGVDMSGNPGGSLFAVGAPAVYANQNNTGSATLSVSFVDGTQPTTSDYALSYDGAKYTLTDRATGSVVGTATPSSTPPTMTI…	667	BPSL0280
BKP2_00505	YQQLYQANAKVIQTANSVF	BPSL0280	641	MSNTLMNLGVSGLNAALWGLTTTGQNISNAATPGYSVERPVYAEASGQYTSSGYLPQGVSTVTVERQYNQYLSNQLNAAQTQGSSLSTYYTLVAQLNNYVGSPTAGIATAITNYFTGLQTVANNAADPSARQTAMSNAQTLASQLVAAGQQYSQLRQSVNSQLTDTVTQINSYTSQIAQLNEQIASASSQGQPPNQLLDQRDLAVSKLSQLAGVQVVQSNGNYSVFLSGGQPLVVGNASYQLATVASPSDPSELTIVSKGVAGSAQPGPTQYLPDVSLTGGALGGLLAFRSQTLDPAQAQLGALAVSFASQVNAQNALGVDMSGNPGGSLFAVGAPAVYANQNNTGSATLSVSFVDGTQPTTSDYALSYDGAKYTLTDRATGSVVGTATPSSTPPTMTI…	667	BPSL0280
BKP2_00506	QLYQANAKVIQTANSVFQT	BPSL0280	643	MSNTLMNLGVSGLNAALWGLTTTGQNISNAATPGYSVERPVYAEASGQYTSSGYLPQGVSTVTVERQYNQYLSNQLNAAQTQGSSLSTYYTLVAQLNNYVGSPTAGIATAITNYFTGLQTVANNAADPSARQTAMSNAQTLASQLVAAGQQYSQLRQSVNSQLTDTVTQINSYTSQIAQLNEQIASASSQGQPPNQLLDQRDLAVSKLSQLAGVQVVQSNGNYSVFLSGGQPLVVGNASYQLATVASPSDPSELTIVSKGVAGSAQPGPTQYLPDVSLTGGALGGLLAFRSQTLDPAQAQLGALAVSFASQVNAQNALGVDMSGNPGGSLFAVGAPAVYANQNNTGSATLSVSFVDGTQPTTSDYALSYDGAKYTLTDRATGSVVGTATPSSTPPTMTI…	667	BPSL0280
BKP2_00507	YQANAKVIQTANSVFQTVL	BPSL0280	645	MSNTLMNLGVSGLNAALWGLTTTGQNISNAATPGYSVERPVYAEASGQYTSSGYLPQGVSTVTVERQYNQYLSNQLNAAQTQGSSLSTYYTLVAQLNNYVGSPTAGIATAITNYFTGLQTVANNAADPSARQTAMSNAQTLASQLVAAGQQYSQLRQSVNSQLTDTVTQINSYTSQIAQLNEQIASASSQGQPPNQLLDQRDLAVSKLSQLAGVQVVQSNGNYSVFLSGGQPLVVGNASYQLATVASPSDPSELTIVSKGVAGSAQPGPTQYLPDVSLTGGALGGLLAFRSQTLDPAQAQLGALAVSFASQVNAQNALGVDMSGNPGGSLFAVGAPAVYANQNNTGSATLSVSFVDGTQPTTSDYALSYDGAKYTLTDRATGSVVGTATPSSTPPTMTI…	667	BPSL0280
BKP2_00508	ANAKVIQTANSVFQTVLGL	BPSL0280	647	MSNTLMNLGVSGLNAALWGLTTTGQNISNAATPGYSVERPVYAEASGQYTSSGYLPQGVSTVTVERQYNQYLSNQLNAAQTQGSSLSTYYTLVAQLNNYVGSPTAGIATAITNYFTGLQTVANNAADPSARQTAMSNAQTLASQLVAAGQQYSQLRQSVNSQLTDTVTQINSYTSQIAQLNEQIASASSQGQPPNQLLDQRDLAVSKLSQLAGVQVVQSNGNYSVFLSGGQPLVVGNASYQLATVASPSDPSELTIVSKGVAGSAQPGPTQYLPDVSLTGGALGGLLAFRSQTLDPAQAQLGALAVSFASQVNAQNALGVDMSGNPGGSLFAVGAPAVYANQNNTGSATLSVSFVDGTQPTTSDYALSYDGAKYTLTDRATGSVVGTATPSSTPPTMTI…	667	BPSL0280
BKP2_00509	AKVIQTANSVFQTVLGLFN	BPSL0280	649	MSNTLMNLGVSGLNAALWGLTTTGQNISNAATPGYSVERPVYAEASGQYTSSGYLPQGVSTVTVERQYNQYLSNQLNAAQTQGSSLSTYYTLVAQLNNYVGSPTAGIATAITNYFTGLQTVANNAADPSARQTAMSNAQTLASQLVAAGQQYSQLRQSVNSQLTDTVTQINSYTSQIAQLNEQIASASSQGQPPNQLLDQRDLAVSKLSQLAGVQVVQSNGNYSVFLSGGQPLVVGNASYQLATVASPSDPSELTIVSKGVAGSAQPGPTQYLPDVSLTGGALGGLLAFRSQTLDPAQAQLGALAVSFASQVNAQNALGVDMSGNPGGSLFAVGAPAVYANQNNTGSATLSVSFVDGTQPTTSDYALSYDGAKYTLTDRATGSVVGTATPSSTPPTMTI…	667	BPSL0280
BKP2_00510	MKSSFSRALQTTFACAAVA	BPSL0326	1	MKSSFSRALQTTFACAAVAALAAGASGACAQSSVQLYGQVDEWIGAQKFPGGQRAWGVQGGGMSTSYWGLRGTEDLGGGYQAIFTLEDFFRAQNGHYGRFDGDTFFGRNAYVGLATPYGTVRAGRLTTQLFISTILFNPFIDSYVFSPMVYHVFLGLGTFPTYTTDQGVVGDSGWNNAIDYTSPSFGGLNAAAMYALGNTAGDNRSKKWSGQLNYSSGPFAATAVYQYVNFNGGPGDLGALVSGMKSQGVAQLGLSYDFKLAKIYAQYMYTKNELNTGSWHVNTAQGGVSVPLGPGSALASYAYSRDSGGHDQTRRTWALGYDYPLSKRTDVYAAYMNDRYSGMSGGDTFGAGIRAK	357	BPSL0326
BKP2_00511	SSFSRALQTTFACAAVAAL	BPSL0326	3	MKSSFSRALQTTFACAAVAALAAGASGACAQSSVQLYGQVDEWIGAQKFPGGQRAWGVQGGGMSTSYWGLRGTEDLGGGYQAIFTLEDFFRAQNGHYGRFDGDTFFGRNAYVGLATPYGTVRAGRLTTQLFISTILFNPFIDSYVFSPMVYHVFLGLGTFPTYTTDQGVVGDSGWNNAIDYTSPSFGGLNAAAMYALGNTAGDNRSKKWSGQLNYSSGPFAATAVYQYVNFNGGPGDLGALVSGMKSQGVAQLGLSYDFKLAKIYAQYMYTKNELNTGSWHVNTAQGGVSVPLGPGSALASYAYSRDSGGHDQTRRTWALGYDYPLSKRTDVYAAYMNDRYSGMSGGDTFGAGIRAK	357	BPSL0326
BKP2_00512	FSRALQTTFACAAVAALAA	BPSL0326	5	MKSSFSRALQTTFACAAVAALAAGASGACAQSSVQLYGQVDEWIGAQKFPGGQRAWGVQGGGMSTSYWGLRGTEDLGGGYQAIFTLEDFFRAQNGHYGRFDGDTFFGRNAYVGLATPYGTVRAGRLTTQLFISTILFNPFIDSYVFSPMVYHVFLGLGTFPTYTTDQGVVGDSGWNNAIDYTSPSFGGLNAAAMYALGNTAGDNRSKKWSGQLNYSSGPFAATAVYQYVNFNGGPGDLGALVSGMKSQGVAQLGLSYDFKLAKIYAQYMYTKNELNTGSWHVNTAQGGVSVPLGPGSALASYAYSRDSGGHDQTRRTWALGYDYPLSKRTDVYAAYMNDRYSGMSGGDTFGAGIRAK	357	BPSL0326
BKP2_00513	RALQTTFACAAVAALAAGA	BPSL0326	7	MKSSFSRALQTTFACAAVAALAAGASGACAQSSVQLYGQVDEWIGAQKFPGGQRAWGVQGGGMSTSYWGLRGTEDLGGGYQAIFTLEDFFRAQNGHYGRFDGDTFFGRNAYVGLATPYGTVRAGRLTTQLFISTILFNPFIDSYVFSPMVYHVFLGLGTFPTYTTDQGVVGDSGWNNAIDYTSPSFGGLNAAAMYALGNTAGDNRSKKWSGQLNYSSGPFAATAVYQYVNFNGGPGDLGALVSGMKSQGVAQLGLSYDFKLAKIYAQYMYTKNELNTGSWHVNTAQGGVSVPLGPGSALASYAYSRDSGGHDQTRRTWALGYDYPLSKRTDVYAAYMNDRYSGMSGGDTFGAGIRAK	357	BPSL0326
BKP2_00514	LQTTFACAAVAALAAGASG	BPSL0326	9	MKSSFSRALQTTFACAAVAALAAGASGACAQSSVQLYGQVDEWIGAQKFPGGQRAWGVQGGGMSTSYWGLRGTEDLGGGYQAIFTLEDFFRAQNGHYGRFDGDTFFGRNAYVGLATPYGTVRAGRLTTQLFISTILFNPFIDSYVFSPMVYHVFLGLGTFPTYTTDQGVVGDSGWNNAIDYTSPSFGGLNAAAMYALGNTAGDNRSKKWSGQLNYSSGPFAATAVYQYVNFNGGPGDLGALVSGMKSQGVAQLGLSYDFKLAKIYAQYMYTKNELNTGSWHVNTAQGGVSVPLGPGSALASYAYSRDSGGHDQTRRTWALGYDYPLSKRTDVYAAYMNDRYSGMSGGDTFGAGIRAK	357	BPSL0326
BKP2_00515	TTFACAAVAALAAGASGAC	BPSL0326	11	MKSSFSRALQTTFACAAVAALAAGASGACAQSSVQLYGQVDEWIGAQKFPGGQRAWGVQGGGMSTSYWGLRGTEDLGGGYQAIFTLEDFFRAQNGHYGRFDGDTFFGRNAYVGLATPYGTVRAGRLTTQLFISTILFNPFIDSYVFSPMVYHVFLGLGTFPTYTTDQGVVGDSGWNNAIDYTSPSFGGLNAAAMYALGNTAGDNRSKKWSGQLNYSSGPFAATAVYQYVNFNGGPGDLGALVSGMKSQGVAQLGLSYDFKLAKIYAQYMYTKNELNTGSWHVNTAQGGVSVPLGPGSALASYAYSRDSGGHDQTRRTWALGYDYPLSKRTDVYAAYMNDRYSGMSGGDTFGAGIRAK	357	BPSL0326
BKP2_00516	FACAAVAALAAGASGACAQ	BPSL0326	13	MKSSFSRALQTTFACAAVAALAAGASGACAQSSVQLYGQVDEWIGAQKFPGGQRAWGVQGGGMSTSYWGLRGTEDLGGGYQAIFTLEDFFRAQNGHYGRFDGDTFFGRNAYVGLATPYGTVRAGRLTTQLFISTILFNPFIDSYVFSPMVYHVFLGLGTFPTYTTDQGVVGDSGWNNAIDYTSPSFGGLNAAAMYALGNTAGDNRSKKWSGQLNYSSGPFAATAVYQYVNFNGGPGDLGALVSGMKSQGVAQLGLSYDFKLAKIYAQYMYTKNELNTGSWHVNTAQGGVSVPLGPGSALASYAYSRDSGGHDQTRRTWALGYDYPLSKRTDVYAAYMNDRYSGMSGGDTFGAGIRAK	357	BPSL0326
BKP2_00517	CAAVAALAAGASGACAQSS	BPSL0326	15	MKSSFSRALQTTFACAAVAALAAGASGACAQSSVQLYGQVDEWIGAQKFPGGQRAWGVQGGGMSTSYWGLRGTEDLGGGYQAIFTLEDFFRAQNGHYGRFDGDTFFGRNAYVGLATPYGTVRAGRLTTQLFISTILFNPFIDSYVFSPMVYHVFLGLGTFPTYTTDQGVVGDSGWNNAIDYTSPSFGGLNAAAMYALGNTAGDNRSKKWSGQLNYSSGPFAATAVYQYVNFNGGPGDLGALVSGMKSQGVAQLGLSYDFKLAKIYAQYMYTKNELNTGSWHVNTAQGGVSVPLGPGSALASYAYSRDSGGHDQTRRTWALGYDYPLSKRTDVYAAYMNDRYSGMSGGDTFGAGIRAK	357	BPSL0326
BKP2_00518	AVAALAAGASGACAQSSVQ	BPSL0326	17	MKSSFSRALQTTFACAAVAALAAGASGACAQSSVQLYGQVDEWIGAQKFPGGQRAWGVQGGGMSTSYWGLRGTEDLGGGYQAIFTLEDFFRAQNGHYGRFDGDTFFGRNAYVGLATPYGTVRAGRLTTQLFISTILFNPFIDSYVFSPMVYHVFLGLGTFPTYTTDQGVVGDSGWNNAIDYTSPSFGGLNAAAMYALGNTAGDNRSKKWSGQLNYSSGPFAATAVYQYVNFNGGPGDLGALVSGMKSQGVAQLGLSYDFKLAKIYAQYMYTKNELNTGSWHVNTAQGGVSVPLGPGSALASYAYSRDSGGHDQTRRTWALGYDYPLSKRTDVYAAYMNDRYSGMSGGDTFGAGIRAK	357	BPSL0326
BKP2_00519	AALAAGASGACAQSSVQLY	BPSL0326	19	MKSSFSRALQTTFACAAVAALAAGASGACAQSSVQLYGQVDEWIGAQKFPGGQRAWGVQGGGMSTSYWGLRGTEDLGGGYQAIFTLEDFFRAQNGHYGRFDGDTFFGRNAYVGLATPYGTVRAGRLTTQLFISTILFNPFIDSYVFSPMVYHVFLGLGTFPTYTTDQGVVGDSGWNNAIDYTSPSFGGLNAAAMYALGNTAGDNRSKKWSGQLNYSSGPFAATAVYQYVNFNGGPGDLGALVSGMKSQGVAQLGLSYDFKLAKIYAQYMYTKNELNTGSWHVNTAQGGVSVPLGPGSALASYAYSRDSGGHDQTRRTWALGYDYPLSKRTDVYAAYMNDRYSGMSGGDTFGAGIRAK	357	BPSL0326
BKP2_00520	LAAGASGACAQSSVQLYGQ	BPSL0326	21	MKSSFSRALQTTFACAAVAALAAGASGACAQSSVQLYGQVDEWIGAQKFPGGQRAWGVQGGGMSTSYWGLRGTEDLGGGYQAIFTLEDFFRAQNGHYGRFDGDTFFGRNAYVGLATPYGTVRAGRLTTQLFISTILFNPFIDSYVFSPMVYHVFLGLGTFPTYTTDQGVVGDSGWNNAIDYTSPSFGGLNAAAMYALGNTAGDNRSKKWSGQLNYSSGPFAATAVYQYVNFNGGPGDLGALVSGMKSQGVAQLGLSYDFKLAKIYAQYMYTKNELNTGSWHVNTAQGGVSVPLGPGSALASYAYSRDSGGHDQTRRTWALGYDYPLSKRTDVYAAYMNDRYSGMSGGDTFGAGIRAK	357	BPSL0326
BKP2_00521	AGASGACAQSSVQLYGQVD	BPSL0326	23	MKSSFSRALQTTFACAAVAALAAGASGACAQSSVQLYGQVDEWIGAQKFPGGQRAWGVQGGGMSTSYWGLRGTEDLGGGYQAIFTLEDFFRAQNGHYGRFDGDTFFGRNAYVGLATPYGTVRAGRLTTQLFISTILFNPFIDSYVFSPMVYHVFLGLGTFPTYTTDQGVVGDSGWNNAIDYTSPSFGGLNAAAMYALGNTAGDNRSKKWSGQLNYSSGPFAATAVYQYVNFNGGPGDLGALVSGMKSQGVAQLGLSYDFKLAKIYAQYMYTKNELNTGSWHVNTAQGGVSVPLGPGSALASYAYSRDSGGHDQTRRTWALGYDYPLSKRTDVYAAYMNDRYSGMSGGDTFGAGIRAK	357	BPSL0326
BKP2_00522	ASGACAQSSVQLYGQVDEW	BPSL0326	25	MKSSFSRALQTTFACAAVAALAAGASGACAQSSVQLYGQVDEWIGAQKFPGGQRAWGVQGGGMSTSYWGLRGTEDLGGGYQAIFTLEDFFRAQNGHYGRFDGDTFFGRNAYVGLATPYGTVRAGRLTTQLFISTILFNPFIDSYVFSPMVYHVFLGLGTFPTYTTDQGVVGDSGWNNAIDYTSPSFGGLNAAAMYALGNTAGDNRSKKWSGQLNYSSGPFAATAVYQYVNFNGGPGDLGALVSGMKSQGVAQLGLSYDFKLAKIYAQYMYTKNELNTGSWHVNTAQGGVSVPLGPGSALASYAYSRDSGGHDQTRRTWALGYDYPLSKRTDVYAAYMNDRYSGMSGGDTFGAGIRAK	357	BPSL0326
BKP2_00523	GACAQSSVQLYGQVDEWIG	BPSL0326	27	MKSSFSRALQTTFACAAVAALAAGASGACAQSSVQLYGQVDEWIGAQKFPGGQRAWGVQGGGMSTSYWGLRGTEDLGGGYQAIFTLEDFFRAQNGHYGRFDGDTFFGRNAYVGLATPYGTVRAGRLTTQLFISTILFNPFIDSYVFSPMVYHVFLGLGTFPTYTTDQGVVGDSGWNNAIDYTSPSFGGLNAAAMYALGNTAGDNRSKKWSGQLNYSSGPFAATAVYQYVNFNGGPGDLGALVSGMKSQGVAQLGLSYDFKLAKIYAQYMYTKNELNTGSWHVNTAQGGVSVPLGPGSALASYAYSRDSGGHDQTRRTWALGYDYPLSKRTDVYAAYMNDRYSGMSGGDTFGAGIRAK	357	BPSL0326
BKP2_00524	CAQSSVQLYGQVDEWIGAQ	BPSL0326	29	MKSSFSRALQTTFACAAVAALAAGASGACAQSSVQLYGQVDEWIGAQKFPGGQRAWGVQGGGMSTSYWGLRGTEDLGGGYQAIFTLEDFFRAQNGHYGRFDGDTFFGRNAYVGLATPYGTVRAGRLTTQLFISTILFNPFIDSYVFSPMVYHVFLGLGTFPTYTTDQGVVGDSGWNNAIDYTSPSFGGLNAAAMYALGNTAGDNRSKKWSGQLNYSSGPFAATAVYQYVNFNGGPGDLGALVSGMKSQGVAQLGLSYDFKLAKIYAQYMYTKNELNTGSWHVNTAQGGVSVPLGPGSALASYAYSRDSGGHDQTRRTWALGYDYPLSKRTDVYAAYMNDRYSGMSGGDTFGAGIRAK	357	BPSL0326
BKP2_00525	QSSVQLYGQVDEWIGAQKF	BPSL0326	31	MKSSFSRALQTTFACAAVAALAAGASGACAQSSVQLYGQVDEWIGAQKFPGGQRAWGVQGGGMSTSYWGLRGTEDLGGGYQAIFTLEDFFRAQNGHYGRFDGDTFFGRNAYVGLATPYGTVRAGRLTTQLFISTILFNPFIDSYVFSPMVYHVFLGLGTFPTYTTDQGVVGDSGWNNAIDYTSPSFGGLNAAAMYALGNTAGDNRSKKWSGQLNYSSGPFAATAVYQYVNFNGGPGDLGALVSGMKSQGVAQLGLSYDFKLAKIYAQYMYTKNELNTGSWHVNTAQGGVSVPLGPGSALASYAYSRDSGGHDQTRRTWALGYDYPLSKRTDVYAAYMNDRYSGMSGGDTFGAGIRAK	357	BPSL0326
BKP2_00526	SVQLYGQVDEWIGAQKFPG	BPSL0326	33	MKSSFSRALQTTFACAAVAALAAGASGACAQSSVQLYGQVDEWIGAQKFPGGQRAWGVQGGGMSTSYWGLRGTEDLGGGYQAIFTLEDFFRAQNGHYGRFDGDTFFGRNAYVGLATPYGTVRAGRLTTQLFISTILFNPFIDSYVFSPMVYHVFLGLGTFPTYTTDQGVVGDSGWNNAIDYTSPSFGGLNAAAMYALGNTAGDNRSKKWSGQLNYSSGPFAATAVYQYVNFNGGPGDLGALVSGMKSQGVAQLGLSYDFKLAKIYAQYMYTKNELNTGSWHVNTAQGGVSVPLGPGSALASYAYSRDSGGHDQTRRTWALGYDYPLSKRTDVYAAYMNDRYSGMSGGDTFGAGIRAK	357	BPSL0326
BKP2_00527	QLYGQVDEWIGAQKFPGGQ	BPSL0326	35	MKSSFSRALQTTFACAAVAALAAGASGACAQSSVQLYGQVDEWIGAQKFPGGQRAWGVQGGGMSTSYWGLRGTEDLGGGYQAIFTLEDFFRAQNGHYGRFDGDTFFGRNAYVGLATPYGTVRAGRLTTQLFISTILFNPFIDSYVFSPMVYHVFLGLGTFPTYTTDQGVVGDSGWNNAIDYTSPSFGGLNAAAMYALGNTAGDNRSKKWSGQLNYSSGPFAATAVYQYVNFNGGPGDLGALVSGMKSQGVAQLGLSYDFKLAKIYAQYMYTKNELNTGSWHVNTAQGGVSVPLGPGSALASYAYSRDSGGHDQTRRTWALGYDYPLSKRTDVYAAYMNDRYSGMSGGDTFGAGIRAK	357	BPSL0326
BKP2_00528	YGQVDEWIGAQKFPGGQRA	BPSL0326	37	MKSSFSRALQTTFACAAVAALAAGASGACAQSSVQLYGQVDEWIGAQKFPGGQRAWGVQGGGMSTSYWGLRGTEDLGGGYQAIFTLEDFFRAQNGHYGRFDGDTFFGRNAYVGLATPYGTVRAGRLTTQLFISTILFNPFIDSYVFSPMVYHVFLGLGTFPTYTTDQGVVGDSGWNNAIDYTSPSFGGLNAAAMYALGNTAGDNRSKKWSGQLNYSSGPFAATAVYQYVNFNGGPGDLGALVSGMKSQGVAQLGLSYDFKLAKIYAQYMYTKNELNTGSWHVNTAQGGVSVPLGPGSALASYAYSRDSGGHDQTRRTWALGYDYPLSKRTDVYAAYMNDRYSGMSGGDTFGAGIRAK	357	BPSL0326
BKP2_00529	QVDEWIGAQKFPGGQRAWG	BPSL0326	39	MKSSFSRALQTTFACAAVAALAAGASGACAQSSVQLYGQVDEWIGAQKFPGGQRAWGVQGGGMSTSYWGLRGTEDLGGGYQAIFTLEDFFRAQNGHYGRFDGDTFFGRNAYVGLATPYGTVRAGRLTTQLFISTILFNPFIDSYVFSPMVYHVFLGLGTFPTYTTDQGVVGDSGWNNAIDYTSPSFGGLNAAAMYALGNTAGDNRSKKWSGQLNYSSGPFAATAVYQYVNFNGGPGDLGALVSGMKSQGVAQLGLSYDFKLAKIYAQYMYTKNELNTGSWHVNTAQGGVSVPLGPGSALASYAYSRDSGGHDQTRRTWALGYDYPLSKRTDVYAAYMNDRYSGMSGGDTFGAGIRAK	357	BPSL0326
BKP2_00530	DEWIGAQKFPGGQRAWGVQ	BPSL0326	41	MKSSFSRALQTTFACAAVAALAAGASGACAQSSVQLYGQVDEWIGAQKFPGGQRAWGVQGGGMSTSYWGLRGTEDLGGGYQAIFTLEDFFRAQNGHYGRFDGDTFFGRNAYVGLATPYGTVRAGRLTTQLFISTILFNPFIDSYVFSPMVYHVFLGLGTFPTYTTDQGVVGDSGWNNAIDYTSPSFGGLNAAAMYALGNTAGDNRSKKWSGQLNYSSGPFAATAVYQYVNFNGGPGDLGALVSGMKSQGVAQLGLSYDFKLAKIYAQYMYTKNELNTGSWHVNTAQGGVSVPLGPGSALASYAYSRDSGGHDQTRRTWALGYDYPLSKRTDVYAAYMNDRYSGMSGGDTFGAGIRAK	357	BPSL0326
BKP2_00531	WIGAQKFPGGQRAWGVQGG	BPSL0326	43	MKSSFSRALQTTFACAAVAALAAGASGACAQSSVQLYGQVDEWIGAQKFPGGQRAWGVQGGGMSTSYWGLRGTEDLGGGYQAIFTLEDFFRAQNGHYGRFDGDTFFGRNAYVGLATPYGTVRAGRLTTQLFISTILFNPFIDSYVFSPMVYHVFLGLGTFPTYTTDQGVVGDSGWNNAIDYTSPSFGGLNAAAMYALGNTAGDNRSKKWSGQLNYSSGPFAATAVYQYVNFNGGPGDLGALVSGMKSQGVAQLGLSYDFKLAKIYAQYMYTKNELNTGSWHVNTAQGGVSVPLGPGSALASYAYSRDSGGHDQTRRTWALGYDYPLSKRTDVYAAYMNDRYSGMSGGDTFGAGIRAK	357	BPSL0326
BKP2_00532	GAQKFPGGQRAWGVQGGGM	BPSL0326	45	MKSSFSRALQTTFACAAVAALAAGASGACAQSSVQLYGQVDEWIGAQKFPGGQRAWGVQGGGMSTSYWGLRGTEDLGGGYQAIFTLEDFFRAQNGHYGRFDGDTFFGRNAYVGLATPYGTVRAGRLTTQLFISTILFNPFIDSYVFSPMVYHVFLGLGTFPTYTTDQGVVGDSGWNNAIDYTSPSFGGLNAAAMYALGNTAGDNRSKKWSGQLNYSSGPFAATAVYQYVNFNGGPGDLGALVSGMKSQGVAQLGLSYDFKLAKIYAQYMYTKNELNTGSWHVNTAQGGVSVPLGPGSALASYAYSRDSGGHDQTRRTWALGYDYPLSKRTDVYAAYMNDRYSGMSGGDTFGAGIRAK	357	BPSL0326
BKP2_00533	QKFPGGQRAWGVQGGGMST	BPSL0326	47	MKSSFSRALQTTFACAAVAALAAGASGACAQSSVQLYGQVDEWIGAQKFPGGQRAWGVQGGGMSTSYWGLRGTEDLGGGYQAIFTLEDFFRAQNGHYGRFDGDTFFGRNAYVGLATPYGTVRAGRLTTQLFISTILFNPFIDSYVFSPMVYHVFLGLGTFPTYTTDQGVVGDSGWNNAIDYTSPSFGGLNAAAMYALGNTAGDNRSKKWSGQLNYSSGPFAATAVYQYVNFNGGPGDLGALVSGMKSQGVAQLGLSYDFKLAKIYAQYMYTKNELNTGSWHVNTAQGGVSVPLGPGSALASYAYSRDSGGHDQTRRTWALGYDYPLSKRTDVYAAYMNDRYSGMSGGDTFGAGIRAK	357	BPSL0326
BKP2_00534	FPGGQRAWGVQGGGMSTSY	BPSL0326	49	MKSSFSRALQTTFACAAVAALAAGASGACAQSSVQLYGQVDEWIGAQKFPGGQRAWGVQGGGMSTSYWGLRGTEDLGGGYQAIFTLEDFFRAQNGHYGRFDGDTFFGRNAYVGLATPYGTVRAGRLTTQLFISTILFNPFIDSYVFSPMVYHVFLGLGTFPTYTTDQGVVGDSGWNNAIDYTSPSFGGLNAAAMYALGNTAGDNRSKKWSGQLNYSSGPFAATAVYQYVNFNGGPGDLGALVSGMKSQGVAQLGLSYDFKLAKIYAQYMYTKNELNTGSWHVNTAQGGVSVPLGPGSALASYAYSRDSGGHDQTRRTWALGYDYPLSKRTDVYAAYMNDRYSGMSGGDTFGAGIRAK	357	BPSL0326
BKP2_00535	GGQRAWGVQGGGMSTSYWG	BPSL0326	51	MKSSFSRALQTTFACAAVAALAAGASGACAQSSVQLYGQVDEWIGAQKFPGGQRAWGVQGGGMSTSYWGLRGTEDLGGGYQAIFTLEDFFRAQNGHYGRFDGDTFFGRNAYVGLATPYGTVRAGRLTTQLFISTILFNPFIDSYVFSPMVYHVFLGLGTFPTYTTDQGVVGDSGWNNAIDYTSPSFGGLNAAAMYALGNTAGDNRSKKWSGQLNYSSGPFAATAVYQYVNFNGGPGDLGALVSGMKSQGVAQLGLSYDFKLAKIYAQYMYTKNELNTGSWHVNTAQGGVSVPLGPGSALASYAYSRDSGGHDQTRRTWALGYDYPLSKRTDVYAAYMNDRYSGMSGGDTFGAGIRAK	357	BPSL0326
BKP2_00536	QRAWGVQGGGMSTSYWGLR	BPSL0326	53	MKSSFSRALQTTFACAAVAALAAGASGACAQSSVQLYGQVDEWIGAQKFPGGQRAWGVQGGGMSTSYWGLRGTEDLGGGYQAIFTLEDFFRAQNGHYGRFDGDTFFGRNAYVGLATPYGTVRAGRLTTQLFISTILFNPFIDSYVFSPMVYHVFLGLGTFPTYTTDQGVVGDSGWNNAIDYTSPSFGGLNAAAMYALGNTAGDNRSKKWSGQLNYSSGPFAATAVYQYVNFNGGPGDLGALVSGMKSQGVAQLGLSYDFKLAKIYAQYMYTKNELNTGSWHVNTAQGGVSVPLGPGSALASYAYSRDSGGHDQTRRTWALGYDYPLSKRTDVYAAYMNDRYSGMSGGDTFGAGIRAK	357	BPSL0326
BKP2_00537	AWGVQGGGMSTSYWGLRGT	BPSL0326	55	MKSSFSRALQTTFACAAVAALAAGASGACAQSSVQLYGQVDEWIGAQKFPGGQRAWGVQGGGMSTSYWGLRGTEDLGGGYQAIFTLEDFFRAQNGHYGRFDGDTFFGRNAYVGLATPYGTVRAGRLTTQLFISTILFNPFIDSYVFSPMVYHVFLGLGTFPTYTTDQGVVGDSGWNNAIDYTSPSFGGLNAAAMYALGNTAGDNRSKKWSGQLNYSSGPFAATAVYQYVNFNGGPGDLGALVSGMKSQGVAQLGLSYDFKLAKIYAQYMYTKNELNTGSWHVNTAQGGVSVPLGPGSALASYAYSRDSGGHDQTRRTWALGYDYPLSKRTDVYAAYMNDRYSGMSGGDTFGAGIRAK	357	BPSL0326
BKP2_00538	GVQGGGMSTSYWGLRGTED	BPSL0326	57	MKSSFSRALQTTFACAAVAALAAGASGACAQSSVQLYGQVDEWIGAQKFPGGQRAWGVQGGGMSTSYWGLRGTEDLGGGYQAIFTLEDFFRAQNGHYGRFDGDTFFGRNAYVGLATPYGTVRAGRLTTQLFISTILFNPFIDSYVFSPMVYHVFLGLGTFPTYTTDQGVVGDSGWNNAIDYTSPSFGGLNAAAMYALGNTAGDNRSKKWSGQLNYSSGPFAATAVYQYVNFNGGPGDLGALVSGMKSQGVAQLGLSYDFKLAKIYAQYMYTKNELNTGSWHVNTAQGGVSVPLGPGSALASYAYSRDSGGHDQTRRTWALGYDYPLSKRTDVYAAYMNDRYSGMSGGDTFGAGIRAK	357	BPSL0326
BKP2_00539	QGGGMSTSYWGLRGTEDLG	BPSL0326	59	MKSSFSRALQTTFACAAVAALAAGASGACAQSSVQLYGQVDEWIGAQKFPGGQRAWGVQGGGMSTSYWGLRGTEDLGGGYQAIFTLEDFFRAQNGHYGRFDGDTFFGRNAYVGLATPYGTVRAGRLTTQLFISTILFNPFIDSYVFSPMVYHVFLGLGTFPTYTTDQGVVGDSGWNNAIDYTSPSFGGLNAAAMYALGNTAGDNRSKKWSGQLNYSSGPFAATAVYQYVNFNGGPGDLGALVSGMKSQGVAQLGLSYDFKLAKIYAQYMYTKNELNTGSWHVNTAQGGVSVPLGPGSALASYAYSRDSGGHDQTRRTWALGYDYPLSKRTDVYAAYMNDRYSGMSGGDTFGAGIRAK	357	BPSL0326
BKP2_00540	GGMSTSYWGLRGTEDLGGG	BPSL0326	61	MKSSFSRALQTTFACAAVAALAAGASGACAQSSVQLYGQVDEWIGAQKFPGGQRAWGVQGGGMSTSYWGLRGTEDLGGGYQAIFTLEDFFRAQNGHYGRFDGDTFFGRNAYVGLATPYGTVRAGRLTTQLFISTILFNPFIDSYVFSPMVYHVFLGLGTFPTYTTDQGVVGDSGWNNAIDYTSPSFGGLNAAAMYALGNTAGDNRSKKWSGQLNYSSGPFAATAVYQYVNFNGGPGDLGALVSGMKSQGVAQLGLSYDFKLAKIYAQYMYTKNELNTGSWHVNTAQGGVSVPLGPGSALASYAYSRDSGGHDQTRRTWALGYDYPLSKRTDVYAAYMNDRYSGMSGGDTFGAGIRAK	357	BPSL0326
BKP2_00541	MSTSYWGLRGTEDLGGGYQ	BPSL0326	63	MKSSFSRALQTTFACAAVAALAAGASGACAQSSVQLYGQVDEWIGAQKFPGGQRAWGVQGGGMSTSYWGLRGTEDLGGGYQAIFTLEDFFRAQNGHYGRFDGDTFFGRNAYVGLATPYGTVRAGRLTTQLFISTILFNPFIDSYVFSPMVYHVFLGLGTFPTYTTDQGVVGDSGWNNAIDYTSPSFGGLNAAAMYALGNTAGDNRSKKWSGQLNYSSGPFAATAVYQYVNFNGGPGDLGALVSGMKSQGVAQLGLSYDFKLAKIYAQYMYTKNELNTGSWHVNTAQGGVSVPLGPGSALASYAYSRDSGGHDQTRRTWALGYDYPLSKRTDVYAAYMNDRYSGMSGGDTFGAGIRAK	357	BPSL0326
BKP2_00542	TSYWGLRGTEDLGGGYQAI	BPSL0326	65	MKSSFSRALQTTFACAAVAALAAGASGACAQSSVQLYGQVDEWIGAQKFPGGQRAWGVQGGGMSTSYWGLRGTEDLGGGYQAIFTLEDFFRAQNGHYGRFDGDTFFGRNAYVGLATPYGTVRAGRLTTQLFISTILFNPFIDSYVFSPMVYHVFLGLGTFPTYTTDQGVVGDSGWNNAIDYTSPSFGGLNAAAMYALGNTAGDNRSKKWSGQLNYSSGPFAATAVYQYVNFNGGPGDLGALVSGMKSQGVAQLGLSYDFKLAKIYAQYMYTKNELNTGSWHVNTAQGGVSVPLGPGSALASYAYSRDSGGHDQTRRTWALGYDYPLSKRTDVYAAYMNDRYSGMSGGDTFGAGIRAK	357	BPSL0326
BKP2_00543	YWGLRGTEDLGGGYQAIFT	BPSL0326	67	MKSSFSRALQTTFACAAVAALAAGASGACAQSSVQLYGQVDEWIGAQKFPGGQRAWGVQGGGMSTSYWGLRGTEDLGGGYQAIFTLEDFFRAQNGHYGRFDGDTFFGRNAYVGLATPYGTVRAGRLTTQLFISTILFNPFIDSYVFSPMVYHVFLGLGTFPTYTTDQGVVGDSGWNNAIDYTSPSFGGLNAAAMYALGNTAGDNRSKKWSGQLNYSSGPFAATAVYQYVNFNGGPGDLGALVSGMKSQGVAQLGLSYDFKLAKIYAQYMYTKNELNTGSWHVNTAQGGVSVPLGPGSALASYAYSRDSGGHDQTRRTWALGYDYPLSKRTDVYAAYMNDRYSGMSGGDTFGAGIRAK	357	BPSL0326
BKP2_00544	GLRGTEDLGGGYQAIFTLE	BPSL0326	69	MKSSFSRALQTTFACAAVAALAAGASGACAQSSVQLYGQVDEWIGAQKFPGGQRAWGVQGGGMSTSYWGLRGTEDLGGGYQAIFTLEDFFRAQNGHYGRFDGDTFFGRNAYVGLATPYGTVRAGRLTTQLFISTILFNPFIDSYVFSPMVYHVFLGLGTFPTYTTDQGVVGDSGWNNAIDYTSPSFGGLNAAAMYALGNTAGDNRSKKWSGQLNYSSGPFAATAVYQYVNFNGGPGDLGALVSGMKSQGVAQLGLSYDFKLAKIYAQYMYTKNELNTGSWHVNTAQGGVSVPLGPGSALASYAYSRDSGGHDQTRRTWALGYDYPLSKRTDVYAAYMNDRYSGMSGGDTFGAGIRAK	357	BPSL0326
BKP2_00545	RGTEDLGGGYQAIFTLEDF	BPSL0326	71	MKSSFSRALQTTFACAAVAALAAGASGACAQSSVQLYGQVDEWIGAQKFPGGQRAWGVQGGGMSTSYWGLRGTEDLGGGYQAIFTLEDFFRAQNGHYGRFDGDTFFGRNAYVGLATPYGTVRAGRLTTQLFISTILFNPFIDSYVFSPMVYHVFLGLGTFPTYTTDQGVVGDSGWNNAIDYTSPSFGGLNAAAMYALGNTAGDNRSKKWSGQLNYSSGPFAATAVYQYVNFNGGPGDLGALVSGMKSQGVAQLGLSYDFKLAKIYAQYMYTKNELNTGSWHVNTAQGGVSVPLGPGSALASYAYSRDSGGHDQTRRTWALGYDYPLSKRTDVYAAYMNDRYSGMSGGDTFGAGIRAK	357	BPSL0326
BKP2_00546	TEDLGGGYQAIFTLEDFFR	BPSL0326	73	MKSSFSRALQTTFACAAVAALAAGASGACAQSSVQLYGQVDEWIGAQKFPGGQRAWGVQGGGMSTSYWGLRGTEDLGGGYQAIFTLEDFFRAQNGHYGRFDGDTFFGRNAYVGLATPYGTVRAGRLTTQLFISTILFNPFIDSYVFSPMVYHVFLGLGTFPTYTTDQGVVGDSGWNNAIDYTSPSFGGLNAAAMYALGNTAGDNRSKKWSGQLNYSSGPFAATAVYQYVNFNGGPGDLGALVSGMKSQGVAQLGLSYDFKLAKIYAQYMYTKNELNTGSWHVNTAQGGVSVPLGPGSALASYAYSRDSGGHDQTRRTWALGYDYPLSKRTDVYAAYMNDRYSGMSGGDTFGAGIRAK	357	BPSL0326
BKP2_00547	DLGGGYQAIFTLEDFFRAQ	BPSL0326	75	MKSSFSRALQTTFACAAVAALAAGASGACAQSSVQLYGQVDEWIGAQKFPGGQRAWGVQGGGMSTSYWGLRGTEDLGGGYQAIFTLEDFFRAQNGHYGRFDGDTFFGRNAYVGLATPYGTVRAGRLTTQLFISTILFNPFIDSYVFSPMVYHVFLGLGTFPTYTTDQGVVGDSGWNNAIDYTSPSFGGLNAAAMYALGNTAGDNRSKKWSGQLNYSSGPFAATAVYQYVNFNGGPGDLGALVSGMKSQGVAQLGLSYDFKLAKIYAQYMYTKNELNTGSWHVNTAQGGVSVPLGPGSALASYAYSRDSGGHDQTRRTWALGYDYPLSKRTDVYAAYMNDRYSGMSGGDTFGAGIRAK	357	BPSL0326
BKP2_00548	GGGYQAIFTLEDFFRAQNG	BPSL0326	77	MKSSFSRALQTTFACAAVAALAAGASGACAQSSVQLYGQVDEWIGAQKFPGGQRAWGVQGGGMSTSYWGLRGTEDLGGGYQAIFTLEDFFRAQNGHYGRFDGDTFFGRNAYVGLATPYGTVRAGRLTTQLFISTILFNPFIDSYVFSPMVYHVFLGLGTFPTYTTDQGVVGDSGWNNAIDYTSPSFGGLNAAAMYALGNTAGDNRSKKWSGQLNYSSGPFAATAVYQYVNFNGGPGDLGALVSGMKSQGVAQLGLSYDFKLAKIYAQYMYTKNELNTGSWHVNTAQGGVSVPLGPGSALASYAYSRDSGGHDQTRRTWALGYDYPLSKRTDVYAAYMNDRYSGMSGGDTFGAGIRAK	357	BPSL0326
BKP2_00549	GYQAIFTLEDFFRAQNGHY	BPSL0326	79	MKSSFSRALQTTFACAAVAALAAGASGACAQSSVQLYGQVDEWIGAQKFPGGQRAWGVQGGGMSTSYWGLRGTEDLGGGYQAIFTLEDFFRAQNGHYGRFDGDTFFGRNAYVGLATPYGTVRAGRLTTQLFISTILFNPFIDSYVFSPMVYHVFLGLGTFPTYTTDQGVVGDSGWNNAIDYTSPSFGGLNAAAMYALGNTAGDNRSKKWSGQLNYSSGPFAATAVYQYVNFNGGPGDLGALVSGMKSQGVAQLGLSYDFKLAKIYAQYMYTKNELNTGSWHVNTAQGGVSVPLGPGSALASYAYSRDSGGHDQTRRTWALGYDYPLSKRTDVYAAYMNDRYSGMSGGDTFGAGIRAK	357	BPSL0326
BKP2_00550	QAIFTLEDFFRAQNGHYGR	BPSL0326	81	MKSSFSRALQTTFACAAVAALAAGASGACAQSSVQLYGQVDEWIGAQKFPGGQRAWGVQGGGMSTSYWGLRGTEDLGGGYQAIFTLEDFFRAQNGHYGRFDGDTFFGRNAYVGLATPYGTVRAGRLTTQLFISTILFNPFIDSYVFSPMVYHVFLGLGTFPTYTTDQGVVGDSGWNNAIDYTSPSFGGLNAAAMYALGNTAGDNRSKKWSGQLNYSSGPFAATAVYQYVNFNGGPGDLGALVSGMKSQGVAQLGLSYDFKLAKIYAQYMYTKNELNTGSWHVNTAQGGVSVPLGPGSALASYAYSRDSGGHDQTRRTWALGYDYPLSKRTDVYAAYMNDRYSGMSGGDTFGAGIRAK	357	BPSL0326
BKP2_00551	IFTLEDFFRAQNGHYGRFD	BPSL0326	83	MKSSFSRALQTTFACAAVAALAAGASGACAQSSVQLYGQVDEWIGAQKFPGGQRAWGVQGGGMSTSYWGLRGTEDLGGGYQAIFTLEDFFRAQNGHYGRFDGDTFFGRNAYVGLATPYGTVRAGRLTTQLFISTILFNPFIDSYVFSPMVYHVFLGLGTFPTYTTDQGVVGDSGWNNAIDYTSPSFGGLNAAAMYALGNTAGDNRSKKWSGQLNYSSGPFAATAVYQYVNFNGGPGDLGALVSGMKSQGVAQLGLSYDFKLAKIYAQYMYTKNELNTGSWHVNTAQGGVSVPLGPGSALASYAYSRDSGGHDQTRRTWALGYDYPLSKRTDVYAAYMNDRYSGMSGGDTFGAGIRAK	357	BPSL0326
BKP2_00552	TLEDFFRAQNGHYGRFDGD	BPSL0326	85	MKSSFSRALQTTFACAAVAALAAGASGACAQSSVQLYGQVDEWIGAQKFPGGQRAWGVQGGGMSTSYWGLRGTEDLGGGYQAIFTLEDFFRAQNGHYGRFDGDTFFGRNAYVGLATPYGTVRAGRLTTQLFISTILFNPFIDSYVFSPMVYHVFLGLGTFPTYTTDQGVVGDSGWNNAIDYTSPSFGGLNAAAMYALGNTAGDNRSKKWSGQLNYSSGPFAATAVYQYVNFNGGPGDLGALVSGMKSQGVAQLGLSYDFKLAKIYAQYMYTKNELNTGSWHVNTAQGGVSVPLGPGSALASYAYSRDSGGHDQTRRTWALGYDYPLSKRTDVYAAYMNDRYSGMSGGDTFGAGIRAK	357	BPSL0326
BKP2_00553	EDFFRAQNGHYGRFDGDTF	BPSL0326	87	MKSSFSRALQTTFACAAVAALAAGASGACAQSSVQLYGQVDEWIGAQKFPGGQRAWGVQGGGMSTSYWGLRGTEDLGGGYQAIFTLEDFFRAQNGHYGRFDGDTFFGRNAYVGLATPYGTVRAGRLTTQLFISTILFNPFIDSYVFSPMVYHVFLGLGTFPTYTTDQGVVGDSGWNNAIDYTSPSFGGLNAAAMYALGNTAGDNRSKKWSGQLNYSSGPFAATAVYQYVNFNGGPGDLGALVSGMKSQGVAQLGLSYDFKLAKIYAQYMYTKNELNTGSWHVNTAQGGVSVPLGPGSALASYAYSRDSGGHDQTRRTWALGYDYPLSKRTDVYAAYMNDRYSGMSGGDTFGAGIRAK	357	BPSL0326
BKP2_00554	FFRAQNGHYGRFDGDTFFG	BPSL0326	89	MKSSFSRALQTTFACAAVAALAAGASGACAQSSVQLYGQVDEWIGAQKFPGGQRAWGVQGGGMSTSYWGLRGTEDLGGGYQAIFTLEDFFRAQNGHYGRFDGDTFFGRNAYVGLATPYGTVRAGRLTTQLFISTILFNPFIDSYVFSPMVYHVFLGLGTFPTYTTDQGVVGDSGWNNAIDYTSPSFGGLNAAAMYALGNTAGDNRSKKWSGQLNYSSGPFAATAVYQYVNFNGGPGDLGALVSGMKSQGVAQLGLSYDFKLAKIYAQYMYTKNELNTGSWHVNTAQGGVSVPLGPGSALASYAYSRDSGGHDQTRRTWALGYDYPLSKRTDVYAAYMNDRYSGMSGGDTFGAGIRAK	357	BPSL0326
BKP2_00555	RAQNGHYGRFDGDTFFGRN	BPSL0326	91	MKSSFSRALQTTFACAAVAALAAGASGACAQSSVQLYGQVDEWIGAQKFPGGQRAWGVQGGGMSTSYWGLRGTEDLGGGYQAIFTLEDFFRAQNGHYGRFDGDTFFGRNAYVGLATPYGTVRAGRLTTQLFISTILFNPFIDSYVFSPMVYHVFLGLGTFPTYTTDQGVVGDSGWNNAIDYTSPSFGGLNAAAMYALGNTAGDNRSKKWSGQLNYSSGPFAATAVYQYVNFNGGPGDLGALVSGMKSQGVAQLGLSYDFKLAKIYAQYMYTKNELNTGSWHVNTAQGGVSVPLGPGSALASYAYSRDSGGHDQTRRTWALGYDYPLSKRTDVYAAYMNDRYSGMSGGDTFGAGIRAK	357	BPSL0326
BKP2_00556	QNGHYGRFDGDTFFGRNAY	BPSL0326	93	MKSSFSRALQTTFACAAVAALAAGASGACAQSSVQLYGQVDEWIGAQKFPGGQRAWGVQGGGMSTSYWGLRGTEDLGGGYQAIFTLEDFFRAQNGHYGRFDGDTFFGRNAYVGLATPYGTVRAGRLTTQLFISTILFNPFIDSYVFSPMVYHVFLGLGTFPTYTTDQGVVGDSGWNNAIDYTSPSFGGLNAAAMYALGNTAGDNRSKKWSGQLNYSSGPFAATAVYQYVNFNGGPGDLGALVSGMKSQGVAQLGLSYDFKLAKIYAQYMYTKNELNTGSWHVNTAQGGVSVPLGPGSALASYAYSRDSGGHDQTRRTWALGYDYPLSKRTDVYAAYMNDRYSGMSGGDTFGAGIRAK	357	BPSL0326
BKP2_00557	GHYGRFDGDTFFGRNAYVG	BPSL0326	95	MKSSFSRALQTTFACAAVAALAAGASGACAQSSVQLYGQVDEWIGAQKFPGGQRAWGVQGGGMSTSYWGLRGTEDLGGGYQAIFTLEDFFRAQNGHYGRFDGDTFFGRNAYVGLATPYGTVRAGRLTTQLFISTILFNPFIDSYVFSPMVYHVFLGLGTFPTYTTDQGVVGDSGWNNAIDYTSPSFGGLNAAAMYALGNTAGDNRSKKWSGQLNYSSGPFAATAVYQYVNFNGGPGDLGALVSGMKSQGVAQLGLSYDFKLAKIYAQYMYTKNELNTGSWHVNTAQGGVSVPLGPGSALASYAYSRDSGGHDQTRRTWALGYDYPLSKRTDVYAAYMNDRYSGMSGGDTFGAGIRAK	357	BPSL0326
BKP2_00558	YGRFDGDTFFGRNAYVGLA	BPSL0326	97	MKSSFSRALQTTFACAAVAALAAGASGACAQSSVQLYGQVDEWIGAQKFPGGQRAWGVQGGGMSTSYWGLRGTEDLGGGYQAIFTLEDFFRAQNGHYGRFDGDTFFGRNAYVGLATPYGTVRAGRLTTQLFISTILFNPFIDSYVFSPMVYHVFLGLGTFPTYTTDQGVVGDSGWNNAIDYTSPSFGGLNAAAMYALGNTAGDNRSKKWSGQLNYSSGPFAATAVYQYVNFNGGPGDLGALVSGMKSQGVAQLGLSYDFKLAKIYAQYMYTKNELNTGSWHVNTAQGGVSVPLGPGSALASYAYSRDSGGHDQTRRTWALGYDYPLSKRTDVYAAYMNDRYSGMSGGDTFGAGIRAK	357	BPSL0326
BKP2_00559	RFDGDTFFGRNAYVGLATP	BPSL0326	99	MKSSFSRALQTTFACAAVAALAAGASGACAQSSVQLYGQVDEWIGAQKFPGGQRAWGVQGGGMSTSYWGLRGTEDLGGGYQAIFTLEDFFRAQNGHYGRFDGDTFFGRNAYVGLATPYGTVRAGRLTTQLFISTILFNPFIDSYVFSPMVYHVFLGLGTFPTYTTDQGVVGDSGWNNAIDYTSPSFGGLNAAAMYALGNTAGDNRSKKWSGQLNYSSGPFAATAVYQYVNFNGGPGDLGALVSGMKSQGVAQLGLSYDFKLAKIYAQYMYTKNELNTGSWHVNTAQGGVSVPLGPGSALASYAYSRDSGGHDQTRRTWALGYDYPLSKRTDVYAAYMNDRYSGMSGGDTFGAGIRAK	357	BPSL0326
BKP2_00560	DGDTFFGRNAYVGLATPYG	BPSL0326	101	MKSSFSRALQTTFACAAVAALAAGASGACAQSSVQLYGQVDEWIGAQKFPGGQRAWGVQGGGMSTSYWGLRGTEDLGGGYQAIFTLEDFFRAQNGHYGRFDGDTFFGRNAYVGLATPYGTVRAGRLTTQLFISTILFNPFIDSYVFSPMVYHVFLGLGTFPTYTTDQGVVGDSGWNNAIDYTSPSFGGLNAAAMYALGNTAGDNRSKKWSGQLNYSSGPFAATAVYQYVNFNGGPGDLGALVSGMKSQGVAQLGLSYDFKLAKIYAQYMYTKNELNTGSWHVNTAQGGVSVPLGPGSALASYAYSRDSGGHDQTRRTWALGYDYPLSKRTDVYAAYMNDRYSGMSGGDTFGAGIRAK	357	BPSL0326
BKP2_00561	DTFFGRNAYVGLATPYGTV	BPSL0326	103	MKSSFSRALQTTFACAAVAALAAGASGACAQSSVQLYGQVDEWIGAQKFPGGQRAWGVQGGGMSTSYWGLRGTEDLGGGYQAIFTLEDFFRAQNGHYGRFDGDTFFGRNAYVGLATPYGTVRAGRLTTQLFISTILFNPFIDSYVFSPMVYHVFLGLGTFPTYTTDQGVVGDSGWNNAIDYTSPSFGGLNAAAMYALGNTAGDNRSKKWSGQLNYSSGPFAATAVYQYVNFNGGPGDLGALVSGMKSQGVAQLGLSYDFKLAKIYAQYMYTKNELNTGSWHVNTAQGGVSVPLGPGSALASYAYSRDSGGHDQTRRTWALGYDYPLSKRTDVYAAYMNDRYSGMSGGDTFGAGIRAK	357	BPSL0326
BKP2_00562	FFGRNAYVGLATPYGTVRA	BPSL0326	105	MKSSFSRALQTTFACAAVAALAAGASGACAQSSVQLYGQVDEWIGAQKFPGGQRAWGVQGGGMSTSYWGLRGTEDLGGGYQAIFTLEDFFRAQNGHYGRFDGDTFFGRNAYVGLATPYGTVRAGRLTTQLFISTILFNPFIDSYVFSPMVYHVFLGLGTFPTYTTDQGVVGDSGWNNAIDYTSPSFGGLNAAAMYALGNTAGDNRSKKWSGQLNYSSGPFAATAVYQYVNFNGGPGDLGALVSGMKSQGVAQLGLSYDFKLAKIYAQYMYTKNELNTGSWHVNTAQGGVSVPLGPGSALASYAYSRDSGGHDQTRRTWALGYDYPLSKRTDVYAAYMNDRYSGMSGGDTFGAGIRAK	357	BPSL0326
BKP2_00563	GRNAYVGLATPYGTVRAGR	BPSL0326	107	MKSSFSRALQTTFACAAVAALAAGASGACAQSSVQLYGQVDEWIGAQKFPGGQRAWGVQGGGMSTSYWGLRGTEDLGGGYQAIFTLEDFFRAQNGHYGRFDGDTFFGRNAYVGLATPYGTVRAGRLTTQLFISTILFNPFIDSYVFSPMVYHVFLGLGTFPTYTTDQGVVGDSGWNNAIDYTSPSFGGLNAAAMYALGNTAGDNRSKKWSGQLNYSSGPFAATAVYQYVNFNGGPGDLGALVSGMKSQGVAQLGLSYDFKLAKIYAQYMYTKNELNTGSWHVNTAQGGVSVPLGPGSALASYAYSRDSGGHDQTRRTWALGYDYPLSKRTDVYAAYMNDRYSGMSGGDTFGAGIRAK	357	BPSL0326
BKP2_00564	NAYVGLATPYGTVRAGRLT	BPSL0326	109	MKSSFSRALQTTFACAAVAALAAGASGACAQSSVQLYGQVDEWIGAQKFPGGQRAWGVQGGGMSTSYWGLRGTEDLGGGYQAIFTLEDFFRAQNGHYGRFDGDTFFGRNAYVGLATPYGTVRAGRLTTQLFISTILFNPFIDSYVFSPMVYHVFLGLGTFPTYTTDQGVVGDSGWNNAIDYTSPSFGGLNAAAMYALGNTAGDNRSKKWSGQLNYSSGPFAATAVYQYVNFNGGPGDLGALVSGMKSQGVAQLGLSYDFKLAKIYAQYMYTKNELNTGSWHVNTAQGGVSVPLGPGSALASYAYSRDSGGHDQTRRTWALGYDYPLSKRTDVYAAYMNDRYSGMSGGDTFGAGIRAK	357	BPSL0326
BKP2_00565	YVGLATPYGTVRAGRLTTQ	BPSL0326	111	MKSSFSRALQTTFACAAVAALAAGASGACAQSSVQLYGQVDEWIGAQKFPGGQRAWGVQGGGMSTSYWGLRGTEDLGGGYQAIFTLEDFFRAQNGHYGRFDGDTFFGRNAYVGLATPYGTVRAGRLTTQLFISTILFNPFIDSYVFSPMVYHVFLGLGTFPTYTTDQGVVGDSGWNNAIDYTSPSFGGLNAAAMYALGNTAGDNRSKKWSGQLNYSSGPFAATAVYQYVNFNGGPGDLGALVSGMKSQGVAQLGLSYDFKLAKIYAQYMYTKNELNTGSWHVNTAQGGVSVPLGPGSALASYAYSRDSGGHDQTRRTWALGYDYPLSKRTDVYAAYMNDRYSGMSGGDTFGAGIRAK	357	BPSL0326
BKP2_00566	GLATPYGTVRAGRLTTQLF	BPSL0326	113	MKSSFSRALQTTFACAAVAALAAGASGACAQSSVQLYGQVDEWIGAQKFPGGQRAWGVQGGGMSTSYWGLRGTEDLGGGYQAIFTLEDFFRAQNGHYGRFDGDTFFGRNAYVGLATPYGTVRAGRLTTQLFISTILFNPFIDSYVFSPMVYHVFLGLGTFPTYTTDQGVVGDSGWNNAIDYTSPSFGGLNAAAMYALGNTAGDNRSKKWSGQLNYSSGPFAATAVYQYVNFNGGPGDLGALVSGMKSQGVAQLGLSYDFKLAKIYAQYMYTKNELNTGSWHVNTAQGGVSVPLGPGSALASYAYSRDSGGHDQTRRTWALGYDYPLSKRTDVYAAYMNDRYSGMSGGDTFGAGIRAK	357	BPSL0326
BKP2_00567	ATPYGTVRAGRLTTQLFIS	BPSL0326	115	MKSSFSRALQTTFACAAVAALAAGASGACAQSSVQLYGQVDEWIGAQKFPGGQRAWGVQGGGMSTSYWGLRGTEDLGGGYQAIFTLEDFFRAQNGHYGRFDGDTFFGRNAYVGLATPYGTVRAGRLTTQLFISTILFNPFIDSYVFSPMVYHVFLGLGTFPTYTTDQGVVGDSGWNNAIDYTSPSFGGLNAAAMYALGNTAGDNRSKKWSGQLNYSSGPFAATAVYQYVNFNGGPGDLGALVSGMKSQGVAQLGLSYDFKLAKIYAQYMYTKNELNTGSWHVNTAQGGVSVPLGPGSALASYAYSRDSGGHDQTRRTWALGYDYPLSKRTDVYAAYMNDRYSGMSGGDTFGAGIRAK	357	BPSL0326
BKP2_00568	PYGTVRAGRLTTQLFISTI	BPSL0326	117	MKSSFSRALQTTFACAAVAALAAGASGACAQSSVQLYGQVDEWIGAQKFPGGQRAWGVQGGGMSTSYWGLRGTEDLGGGYQAIFTLEDFFRAQNGHYGRFDGDTFFGRNAYVGLATPYGTVRAGRLTTQLFISTILFNPFIDSYVFSPMVYHVFLGLGTFPTYTTDQGVVGDSGWNNAIDYTSPSFGGLNAAAMYALGNTAGDNRSKKWSGQLNYSSGPFAATAVYQYVNFNGGPGDLGALVSGMKSQGVAQLGLSYDFKLAKIYAQYMYTKNELNTGSWHVNTAQGGVSVPLGPGSALASYAYSRDSGGHDQTRRTWALGYDYPLSKRTDVYAAYMNDRYSGMSGGDTFGAGIRAK	357	BPSL0326
BKP2_00569	GTVRAGRLTTQLFISTILF	BPSL0326	119	MKSSFSRALQTTFACAAVAALAAGASGACAQSSVQLYGQVDEWIGAQKFPGGQRAWGVQGGGMSTSYWGLRGTEDLGGGYQAIFTLEDFFRAQNGHYGRFDGDTFFGRNAYVGLATPYGTVRAGRLTTQLFISTILFNPFIDSYVFSPMVYHVFLGLGTFPTYTTDQGVVGDSGWNNAIDYTSPSFGGLNAAAMYALGNTAGDNRSKKWSGQLNYSSGPFAATAVYQYVNFNGGPGDLGALVSGMKSQGVAQLGLSYDFKLAKIYAQYMYTKNELNTGSWHVNTAQGGVSVPLGPGSALASYAYSRDSGGHDQTRRTWALGYDYPLSKRTDVYAAYMNDRYSGMSGGDTFGAGIRAK	357	BPSL0326
BKP2_00570	VRAGRLTTQLFISTILFNP	BPSL0326	121	MKSSFSRALQTTFACAAVAALAAGASGACAQSSVQLYGQVDEWIGAQKFPGGQRAWGVQGGGMSTSYWGLRGTEDLGGGYQAIFTLEDFFRAQNGHYGRFDGDTFFGRNAYVGLATPYGTVRAGRLTTQLFISTILFNPFIDSYVFSPMVYHVFLGLGTFPTYTTDQGVVGDSGWNNAIDYTSPSFGGLNAAAMYALGNTAGDNRSKKWSGQLNYSSGPFAATAVYQYVNFNGGPGDLGALVSGMKSQGVAQLGLSYDFKLAKIYAQYMYTKNELNTGSWHVNTAQGGVSVPLGPGSALASYAYSRDSGGHDQTRRTWALGYDYPLSKRTDVYAAYMNDRYSGMSGGDTFGAGIRAK	357	BPSL0326
BKP2_00571	AGRLTTQLFISTILFNPFI	BPSL0326	123	MKSSFSRALQTTFACAAVAALAAGASGACAQSSVQLYGQVDEWIGAQKFPGGQRAWGVQGGGMSTSYWGLRGTEDLGGGYQAIFTLEDFFRAQNGHYGRFDGDTFFGRNAYVGLATPYGTVRAGRLTTQLFISTILFNPFIDSYVFSPMVYHVFLGLGTFPTYTTDQGVVGDSGWNNAIDYTSPSFGGLNAAAMYALGNTAGDNRSKKWSGQLNYSSGPFAATAVYQYVNFNGGPGDLGALVSGMKSQGVAQLGLSYDFKLAKIYAQYMYTKNELNTGSWHVNTAQGGVSVPLGPGSALASYAYSRDSGGHDQTRRTWALGYDYPLSKRTDVYAAYMNDRYSGMSGGDTFGAGIRAK	357	BPSL0326
BKP2_00572	RLTTQLFISTILFNPFIDS	BPSL0326	125	MKSSFSRALQTTFACAAVAALAAGASGACAQSSVQLYGQVDEWIGAQKFPGGQRAWGVQGGGMSTSYWGLRGTEDLGGGYQAIFTLEDFFRAQNGHYGRFDGDTFFGRNAYVGLATPYGTVRAGRLTTQLFISTILFNPFIDSYVFSPMVYHVFLGLGTFPTYTTDQGVVGDSGWNNAIDYTSPSFGGLNAAAMYALGNTAGDNRSKKWSGQLNYSSGPFAATAVYQYVNFNGGPGDLGALVSGMKSQGVAQLGLSYDFKLAKIYAQYMYTKNELNTGSWHVNTAQGGVSVPLGPGSALASYAYSRDSGGHDQTRRTWALGYDYPLSKRTDVYAAYMNDRYSGMSGGDTFGAGIRAK	357	BPSL0326
BKP2_00573	TTQLFISTILFNPFIDSYV	BPSL0326	127	MKSSFSRALQTTFACAAVAALAAGASGACAQSSVQLYGQVDEWIGAQKFPGGQRAWGVQGGGMSTSYWGLRGTEDLGGGYQAIFTLEDFFRAQNGHYGRFDGDTFFGRNAYVGLATPYGTVRAGRLTTQLFISTILFNPFIDSYVFSPMVYHVFLGLGTFPTYTTDQGVVGDSGWNNAIDYTSPSFGGLNAAAMYALGNTAGDNRSKKWSGQLNYSSGPFAATAVYQYVNFNGGPGDLGALVSGMKSQGVAQLGLSYDFKLAKIYAQYMYTKNELNTGSWHVNTAQGGVSVPLGPGSALASYAYSRDSGGHDQTRRTWALGYDYPLSKRTDVYAAYMNDRYSGMSGGDTFGAGIRAK	357	BPSL0326
BKP2_00574	QLFISTILFNPFIDSYVFS	BPSL0326	129	MKSSFSRALQTTFACAAVAALAAGASGACAQSSVQLYGQVDEWIGAQKFPGGQRAWGVQGGGMSTSYWGLRGTEDLGGGYQAIFTLEDFFRAQNGHYGRFDGDTFFGRNAYVGLATPYGTVRAGRLTTQLFISTILFNPFIDSYVFSPMVYHVFLGLGTFPTYTTDQGVVGDSGWNNAIDYTSPSFGGLNAAAMYALGNTAGDNRSKKWSGQLNYSSGPFAATAVYQYVNFNGGPGDLGALVSGMKSQGVAQLGLSYDFKLAKIYAQYMYTKNELNTGSWHVNTAQGGVSVPLGPGSALASYAYSRDSGGHDQTRRTWALGYDYPLSKRTDVYAAYMNDRYSGMSGGDTFGAGIRAK	357	BPSL0326
BKP2_00575	FISTILFNPFIDSYVFSPM	BPSL0326	131	MKSSFSRALQTTFACAAVAALAAGASGACAQSSVQLYGQVDEWIGAQKFPGGQRAWGVQGGGMSTSYWGLRGTEDLGGGYQAIFTLEDFFRAQNGHYGRFDGDTFFGRNAYVGLATPYGTVRAGRLTTQLFISTILFNPFIDSYVFSPMVYHVFLGLGTFPTYTTDQGVVGDSGWNNAIDYTSPSFGGLNAAAMYALGNTAGDNRSKKWSGQLNYSSGPFAATAVYQYVNFNGGPGDLGALVSGMKSQGVAQLGLSYDFKLAKIYAQYMYTKNELNTGSWHVNTAQGGVSVPLGPGSALASYAYSRDSGGHDQTRRTWALGYDYPLSKRTDVYAAYMNDRYSGMSGGDTFGAGIRAK	357	BPSL0326
BKP2_00576	STILFNPFIDSYVFSPMVY	BPSL0326	133	MKSSFSRALQTTFACAAVAALAAGASGACAQSSVQLYGQVDEWIGAQKFPGGQRAWGVQGGGMSTSYWGLRGTEDLGGGYQAIFTLEDFFRAQNGHYGRFDGDTFFGRNAYVGLATPYGTVRAGRLTTQLFISTILFNPFIDSYVFSPMVYHVFLGLGTFPTYTTDQGVVGDSGWNNAIDYTSPSFGGLNAAAMYALGNTAGDNRSKKWSGQLNYSSGPFAATAVYQYVNFNGGPGDLGALVSGMKSQGVAQLGLSYDFKLAKIYAQYMYTKNELNTGSWHVNTAQGGVSVPLGPGSALASYAYSRDSGGHDQTRRTWALGYDYPLSKRTDVYAAYMNDRYSGMSGGDTFGAGIRAK	357	BPSL0326
BKP2_00577	ILFNPFIDSYVFSPMVYHV	BPSL0326	135	MKSSFSRALQTTFACAAVAALAAGASGACAQSSVQLYGQVDEWIGAQKFPGGQRAWGVQGGGMSTSYWGLRGTEDLGGGYQAIFTLEDFFRAQNGHYGRFDGDTFFGRNAYVGLATPYGTVRAGRLTTQLFISTILFNPFIDSYVFSPMVYHVFLGLGTFPTYTTDQGVVGDSGWNNAIDYTSPSFGGLNAAAMYALGNTAGDNRSKKWSGQLNYSSGPFAATAVYQYVNFNGGPGDLGALVSGMKSQGVAQLGLSYDFKLAKIYAQYMYTKNELNTGSWHVNTAQGGVSVPLGPGSALASYAYSRDSGGHDQTRRTWALGYDYPLSKRTDVYAAYMNDRYSGMSGGDTFGAGIRAK	357	BPSL0326
BKP2_00578	FNPFIDSYVFSPMVYHVFL	BPSL0326	137	MKSSFSRALQTTFACAAVAALAAGASGACAQSSVQLYGQVDEWIGAQKFPGGQRAWGVQGGGMSTSYWGLRGTEDLGGGYQAIFTLEDFFRAQNGHYGRFDGDTFFGRNAYVGLATPYGTVRAGRLTTQLFISTILFNPFIDSYVFSPMVYHVFLGLGTFPTYTTDQGVVGDSGWNNAIDYTSPSFGGLNAAAMYALGNTAGDNRSKKWSGQLNYSSGPFAATAVYQYVNFNGGPGDLGALVSGMKSQGVAQLGLSYDFKLAKIYAQYMYTKNELNTGSWHVNTAQGGVSVPLGPGSALASYAYSRDSGGHDQTRRTWALGYDYPLSKRTDVYAAYMNDRYSGMSGGDTFGAGIRAK	357	BPSL0326
BKP2_00579	PFIDSYVFSPMVYHVFLGL	BPSL0326	139	MKSSFSRALQTTFACAAVAALAAGASGACAQSSVQLYGQVDEWIGAQKFPGGQRAWGVQGGGMSTSYWGLRGTEDLGGGYQAIFTLEDFFRAQNGHYGRFDGDTFFGRNAYVGLATPYGTVRAGRLTTQLFISTILFNPFIDSYVFSPMVYHVFLGLGTFPTYTTDQGVVGDSGWNNAIDYTSPSFGGLNAAAMYALGNTAGDNRSKKWSGQLNYSSGPFAATAVYQYVNFNGGPGDLGALVSGMKSQGVAQLGLSYDFKLAKIYAQYMYTKNELNTGSWHVNTAQGGVSVPLGPGSALASYAYSRDSGGHDQTRRTWALGYDYPLSKRTDVYAAYMNDRYSGMSGGDTFGAGIRAK	357	BPSL0326
BKP2_00580	IDSYVFSPMVYHVFLGLGT	BPSL0326	141	MKSSFSRALQTTFACAAVAALAAGASGACAQSSVQLYGQVDEWIGAQKFPGGQRAWGVQGGGMSTSYWGLRGTEDLGGGYQAIFTLEDFFRAQNGHYGRFDGDTFFGRNAYVGLATPYGTVRAGRLTTQLFISTILFNPFIDSYVFSPMVYHVFLGLGTFPTYTTDQGVVGDSGWNNAIDYTSPSFGGLNAAAMYALGNTAGDNRSKKWSGQLNYSSGPFAATAVYQYVNFNGGPGDLGALVSGMKSQGVAQLGLSYDFKLAKIYAQYMYTKNELNTGSWHVNTAQGGVSVPLGPGSALASYAYSRDSGGHDQTRRTWALGYDYPLSKRTDVYAAYMNDRYSGMSGGDTFGAGIRAK	357	BPSL0326
BKP2_00581	SYVFSPMVYHVFLGLGTFP	BPSL0326	143	MKSSFSRALQTTFACAAVAALAAGASGACAQSSVQLYGQVDEWIGAQKFPGGQRAWGVQGGGMSTSYWGLRGTEDLGGGYQAIFTLEDFFRAQNGHYGRFDGDTFFGRNAYVGLATPYGTVRAGRLTTQLFISTILFNPFIDSYVFSPMVYHVFLGLGTFPTYTTDQGVVGDSGWNNAIDYTSPSFGGLNAAAMYALGNTAGDNRSKKWSGQLNYSSGPFAATAVYQYVNFNGGPGDLGALVSGMKSQGVAQLGLSYDFKLAKIYAQYMYTKNELNTGSWHVNTAQGGVSVPLGPGSALASYAYSRDSGGHDQTRRTWALGYDYPLSKRTDVYAAYMNDRYSGMSGGDTFGAGIRAK	357	BPSL0326
BKP2_00582	VFSPMVYHVFLGLGTFPTY	BPSL0326	145	MKSSFSRALQTTFACAAVAALAAGASGACAQSSVQLYGQVDEWIGAQKFPGGQRAWGVQGGGMSTSYWGLRGTEDLGGGYQAIFTLEDFFRAQNGHYGRFDGDTFFGRNAYVGLATPYGTVRAGRLTTQLFISTILFNPFIDSYVFSPMVYHVFLGLGTFPTYTTDQGVVGDSGWNNAIDYTSPSFGGLNAAAMYALGNTAGDNRSKKWSGQLNYSSGPFAATAVYQYVNFNGGPGDLGALVSGMKSQGVAQLGLSYDFKLAKIYAQYMYTKNELNTGSWHVNTAQGGVSVPLGPGSALASYAYSRDSGGHDQTRRTWALGYDYPLSKRTDVYAAYMNDRYSGMSGGDTFGAGIRAK	357	BPSL0326
BKP2_00583	SPMVYHVFLGLGTFPTYTT	BPSL0326	147	MKSSFSRALQTTFACAAVAALAAGASGACAQSSVQLYGQVDEWIGAQKFPGGQRAWGVQGGGMSTSYWGLRGTEDLGGGYQAIFTLEDFFRAQNGHYGRFDGDTFFGRNAYVGLATPYGTVRAGRLTTQLFISTILFNPFIDSYVFSPMVYHVFLGLGTFPTYTTDQGVVGDSGWNNAIDYTSPSFGGLNAAAMYALGNTAGDNRSKKWSGQLNYSSGPFAATAVYQYVNFNGGPGDLGALVSGMKSQGVAQLGLSYDFKLAKIYAQYMYTKNELNTGSWHVNTAQGGVSVPLGPGSALASYAYSRDSGGHDQTRRTWALGYDYPLSKRTDVYAAYMNDRYSGMSGGDTFGAGIRAK	357	BPSL0326
BKP2_00584	MVYHVFLGLGTFPTYTTDQ	BPSL0326	149	MKSSFSRALQTTFACAAVAALAAGASGACAQSSVQLYGQVDEWIGAQKFPGGQRAWGVQGGGMSTSYWGLRGTEDLGGGYQAIFTLEDFFRAQNGHYGRFDGDTFFGRNAYVGLATPYGTVRAGRLTTQLFISTILFNPFIDSYVFSPMVYHVFLGLGTFPTYTTDQGVVGDSGWNNAIDYTSPSFGGLNAAAMYALGNTAGDNRSKKWSGQLNYSSGPFAATAVYQYVNFNGGPGDLGALVSGMKSQGVAQLGLSYDFKLAKIYAQYMYTKNELNTGSWHVNTAQGGVSVPLGPGSALASYAYSRDSGGHDQTRRTWALGYDYPLSKRTDVYAAYMNDRYSGMSGGDTFGAGIRAK	357	BPSL0326
BKP2_00585	YHVFLGLGTFPTYTTDQGV	BPSL0326	151	MKSSFSRALQTTFACAAVAALAAGASGACAQSSVQLYGQVDEWIGAQKFPGGQRAWGVQGGGMSTSYWGLRGTEDLGGGYQAIFTLEDFFRAQNGHYGRFDGDTFFGRNAYVGLATPYGTVRAGRLTTQLFISTILFNPFIDSYVFSPMVYHVFLGLGTFPTYTTDQGVVGDSGWNNAIDYTSPSFGGLNAAAMYALGNTAGDNRSKKWSGQLNYSSGPFAATAVYQYVNFNGGPGDLGALVSGMKSQGVAQLGLSYDFKLAKIYAQYMYTKNELNTGSWHVNTAQGGVSVPLGPGSALASYAYSRDSGGHDQTRRTWALGYDYPLSKRTDVYAAYMNDRYSGMSGGDTFGAGIRAK	357	BPSL0326
BKP2_00586	VFLGLGTFPTYTTDQGVVG	BPSL0326	153	MKSSFSRALQTTFACAAVAALAAGASGACAQSSVQLYGQVDEWIGAQKFPGGQRAWGVQGGGMSTSYWGLRGTEDLGGGYQAIFTLEDFFRAQNGHYGRFDGDTFFGRNAYVGLATPYGTVRAGRLTTQLFISTILFNPFIDSYVFSPMVYHVFLGLGTFPTYTTDQGVVGDSGWNNAIDYTSPSFGGLNAAAMYALGNTAGDNRSKKWSGQLNYSSGPFAATAVYQYVNFNGGPGDLGALVSGMKSQGVAQLGLSYDFKLAKIYAQYMYTKNELNTGSWHVNTAQGGVSVPLGPGSALASYAYSRDSGGHDQTRRTWALGYDYPLSKRTDVYAAYMNDRYSGMSGGDTFGAGIRAK	357	BPSL0326
BKP2_00587	LGLGTFPTYTTDQGVVGDS	BPSL0326	155	MKSSFSRALQTTFACAAVAALAAGASGACAQSSVQLYGQVDEWIGAQKFPGGQRAWGVQGGGMSTSYWGLRGTEDLGGGYQAIFTLEDFFRAQNGHYGRFDGDTFFGRNAYVGLATPYGTVRAGRLTTQLFISTILFNPFIDSYVFSPMVYHVFLGLGTFPTYTTDQGVVGDSGWNNAIDYTSPSFGGLNAAAMYALGNTAGDNRSKKWSGQLNYSSGPFAATAVYQYVNFNGGPGDLGALVSGMKSQGVAQLGLSYDFKLAKIYAQYMYTKNELNTGSWHVNTAQGGVSVPLGPGSALASYAYSRDSGGHDQTRRTWALGYDYPLSKRTDVYAAYMNDRYSGMSGGDTFGAGIRAK	357	BPSL0326
BKP2_00588	LGTFPTYTTDQGVVGDSGW	BPSL0326	157	MKSSFSRALQTTFACAAVAALAAGASGACAQSSVQLYGQVDEWIGAQKFPGGQRAWGVQGGGMSTSYWGLRGTEDLGGGYQAIFTLEDFFRAQNGHYGRFDGDTFFGRNAYVGLATPYGTVRAGRLTTQLFISTILFNPFIDSYVFSPMVYHVFLGLGTFPTYTTDQGVVGDSGWNNAIDYTSPSFGGLNAAAMYALGNTAGDNRSKKWSGQLNYSSGPFAATAVYQYVNFNGGPGDLGALVSGMKSQGVAQLGLSYDFKLAKIYAQYMYTKNELNTGSWHVNTAQGGVSVPLGPGSALASYAYSRDSGGHDQTRRTWALGYDYPLSKRTDVYAAYMNDRYSGMSGGDTFGAGIRAK	357	BPSL0326
BKP2_00589	TFPTYTTDQGVVGDSGWNN	BPSL0326	159	MKSSFSRALQTTFACAAVAALAAGASGACAQSSVQLYGQVDEWIGAQKFPGGQRAWGVQGGGMSTSYWGLRGTEDLGGGYQAIFTLEDFFRAQNGHYGRFDGDTFFGRNAYVGLATPYGTVRAGRLTTQLFISTILFNPFIDSYVFSPMVYHVFLGLGTFPTYTTDQGVVGDSGWNNAIDYTSPSFGGLNAAAMYALGNTAGDNRSKKWSGQLNYSSGPFAATAVYQYVNFNGGPGDLGALVSGMKSQGVAQLGLSYDFKLAKIYAQYMYTKNELNTGSWHVNTAQGGVSVPLGPGSALASYAYSRDSGGHDQTRRTWALGYDYPLSKRTDVYAAYMNDRYSGMSGGDTFGAGIRAK	357	BPSL0326
BKP2_00590	PTYTTDQGVVGDSGWNNAI	BPSL0326	161	MKSSFSRALQTTFACAAVAALAAGASGACAQSSVQLYGQVDEWIGAQKFPGGQRAWGVQGGGMSTSYWGLRGTEDLGGGYQAIFTLEDFFRAQNGHYGRFDGDTFFGRNAYVGLATPYGTVRAGRLTTQLFISTILFNPFIDSYVFSPMVYHVFLGLGTFPTYTTDQGVVGDSGWNNAIDYTSPSFGGLNAAAMYALGNTAGDNRSKKWSGQLNYSSGPFAATAVYQYVNFNGGPGDLGALVSGMKSQGVAQLGLSYDFKLAKIYAQYMYTKNELNTGSWHVNTAQGGVSVPLGPGSALASYAYSRDSGGHDQTRRTWALGYDYPLSKRTDVYAAYMNDRYSGMSGGDTFGAGIRAK	357	BPSL0326
BKP2_00591	YTTDQGVVGDSGWNNAIDY	BPSL0326	163	MKSSFSRALQTTFACAAVAALAAGASGACAQSSVQLYGQVDEWIGAQKFPGGQRAWGVQGGGMSTSYWGLRGTEDLGGGYQAIFTLEDFFRAQNGHYGRFDGDTFFGRNAYVGLATPYGTVRAGRLTTQLFISTILFNPFIDSYVFSPMVYHVFLGLGTFPTYTTDQGVVGDSGWNNAIDYTSPSFGGLNAAAMYALGNTAGDNRSKKWSGQLNYSSGPFAATAVYQYVNFNGGPGDLGALVSGMKSQGVAQLGLSYDFKLAKIYAQYMYTKNELNTGSWHVNTAQGGVSVPLGPGSALASYAYSRDSGGHDQTRRTWALGYDYPLSKRTDVYAAYMNDRYSGMSGGDTFGAGIRAK	357	BPSL0326
BKP2_00592	TDQGVVGDSGWNNAIDYTS	BPSL0326	165	MKSSFSRALQTTFACAAVAALAAGASGACAQSSVQLYGQVDEWIGAQKFPGGQRAWGVQGGGMSTSYWGLRGTEDLGGGYQAIFTLEDFFRAQNGHYGRFDGDTFFGRNAYVGLATPYGTVRAGRLTTQLFISTILFNPFIDSYVFSPMVYHVFLGLGTFPTYTTDQGVVGDSGWNNAIDYTSPSFGGLNAAAMYALGNTAGDNRSKKWSGQLNYSSGPFAATAVYQYVNFNGGPGDLGALVSGMKSQGVAQLGLSYDFKLAKIYAQYMYTKNELNTGSWHVNTAQGGVSVPLGPGSALASYAYSRDSGGHDQTRRTWALGYDYPLSKRTDVYAAYMNDRYSGMSGGDTFGAGIRAK	357	BPSL0326
BKP2_00593	QGVVGDSGWNNAIDYTSPS	BPSL0326	167	MKSSFSRALQTTFACAAVAALAAGASGACAQSSVQLYGQVDEWIGAQKFPGGQRAWGVQGGGMSTSYWGLRGTEDLGGGYQAIFTLEDFFRAQNGHYGRFDGDTFFGRNAYVGLATPYGTVRAGRLTTQLFISTILFNPFIDSYVFSPMVYHVFLGLGTFPTYTTDQGVVGDSGWNNAIDYTSPSFGGLNAAAMYALGNTAGDNRSKKWSGQLNYSSGPFAATAVYQYVNFNGGPGDLGALVSGMKSQGVAQLGLSYDFKLAKIYAQYMYTKNELNTGSWHVNTAQGGVSVPLGPGSALASYAYSRDSGGHDQTRRTWALGYDYPLSKRTDVYAAYMNDRYSGMSGGDTFGAGIRAK	357	BPSL0326
BKP2_00594	VVGDSGWNNAIDYTSPSFG	BPSL0326	169	MKSSFSRALQTTFACAAVAALAAGASGACAQSSVQLYGQVDEWIGAQKFPGGQRAWGVQGGGMSTSYWGLRGTEDLGGGYQAIFTLEDFFRAQNGHYGRFDGDTFFGRNAYVGLATPYGTVRAGRLTTQLFISTILFNPFIDSYVFSPMVYHVFLGLGTFPTYTTDQGVVGDSGWNNAIDYTSPSFGGLNAAAMYALGNTAGDNRSKKWSGQLNYSSGPFAATAVYQYVNFNGGPGDLGALVSGMKSQGVAQLGLSYDFKLAKIYAQYMYTKNELNTGSWHVNTAQGGVSVPLGPGSALASYAYSRDSGGHDQTRRTWALGYDYPLSKRTDVYAAYMNDRYSGMSGGDTFGAGIRAK	357	BPSL0326
BKP2_00595	GDSGWNNAIDYTSPSFGGL	BPSL0326	171	MKSSFSRALQTTFACAAVAALAAGASGACAQSSVQLYGQVDEWIGAQKFPGGQRAWGVQGGGMSTSYWGLRGTEDLGGGYQAIFTLEDFFRAQNGHYGRFDGDTFFGRNAYVGLATPYGTVRAGRLTTQLFISTILFNPFIDSYVFSPMVYHVFLGLGTFPTYTTDQGVVGDSGWNNAIDYTSPSFGGLNAAAMYALGNTAGDNRSKKWSGQLNYSSGPFAATAVYQYVNFNGGPGDLGALVSGMKSQGVAQLGLSYDFKLAKIYAQYMYTKNELNTGSWHVNTAQGGVSVPLGPGSALASYAYSRDSGGHDQTRRTWALGYDYPLSKRTDVYAAYMNDRYSGMSGGDTFGAGIRAK	357	BPSL0326
BKP2_00596	SGWNNAIDYTSPSFGGLNA	BPSL0326	173	MKSSFSRALQTTFACAAVAALAAGASGACAQSSVQLYGQVDEWIGAQKFPGGQRAWGVQGGGMSTSYWGLRGTEDLGGGYQAIFTLEDFFRAQNGHYGRFDGDTFFGRNAYVGLATPYGTVRAGRLTTQLFISTILFNPFIDSYVFSPMVYHVFLGLGTFPTYTTDQGVVGDSGWNNAIDYTSPSFGGLNAAAMYALGNTAGDNRSKKWSGQLNYSSGPFAATAVYQYVNFNGGPGDLGALVSGMKSQGVAQLGLSYDFKLAKIYAQYMYTKNELNTGSWHVNTAQGGVSVPLGPGSALASYAYSRDSGGHDQTRRTWALGYDYPLSKRTDVYAAYMNDRYSGMSGGDTFGAGIRAK	357	BPSL0326
BKP2_00597	WNNAIDYTSPSFGGLNAAA	BPSL0326	175	MKSSFSRALQTTFACAAVAALAAGASGACAQSSVQLYGQVDEWIGAQKFPGGQRAWGVQGGGMSTSYWGLRGTEDLGGGYQAIFTLEDFFRAQNGHYGRFDGDTFFGRNAYVGLATPYGTVRAGRLTTQLFISTILFNPFIDSYVFSPMVYHVFLGLGTFPTYTTDQGVVGDSGWNNAIDYTSPSFGGLNAAAMYALGNTAGDNRSKKWSGQLNYSSGPFAATAVYQYVNFNGGPGDLGALVSGMKSQGVAQLGLSYDFKLAKIYAQYMYTKNELNTGSWHVNTAQGGVSVPLGPGSALASYAYSRDSGGHDQTRRTWALGYDYPLSKRTDVYAAYMNDRYSGMSGGDTFGAGIRAK	357	BPSL0326
BKP2_00598	NAIDYTSPSFGGLNAAAMY	BPSL0326	177	MKSSFSRALQTTFACAAVAALAAGASGACAQSSVQLYGQVDEWIGAQKFPGGQRAWGVQGGGMSTSYWGLRGTEDLGGGYQAIFTLEDFFRAQNGHYGRFDGDTFFGRNAYVGLATPYGTVRAGRLTTQLFISTILFNPFIDSYVFSPMVYHVFLGLGTFPTYTTDQGVVGDSGWNNAIDYTSPSFGGLNAAAMYALGNTAGDNRSKKWSGQLNYSSGPFAATAVYQYVNFNGGPGDLGALVSGMKSQGVAQLGLSYDFKLAKIYAQYMYTKNELNTGSWHVNTAQGGVSVPLGPGSALASYAYSRDSGGHDQTRRTWALGYDYPLSKRTDVYAAYMNDRYSGMSGGDTFGAGIRAK	357	BPSL0326
BKP2_00599	IDYTSPSFGGLNAAAMYAL	BPSL0326	179	MKSSFSRALQTTFACAAVAALAAGASGACAQSSVQLYGQVDEWIGAQKFPGGQRAWGVQGGGMSTSYWGLRGTEDLGGGYQAIFTLEDFFRAQNGHYGRFDGDTFFGRNAYVGLATPYGTVRAGRLTTQLFISTILFNPFIDSYVFSPMVYHVFLGLGTFPTYTTDQGVVGDSGWNNAIDYTSPSFGGLNAAAMYALGNTAGDNRSKKWSGQLNYSSGPFAATAVYQYVNFNGGPGDLGALVSGMKSQGVAQLGLSYDFKLAKIYAQYMYTKNELNTGSWHVNTAQGGVSVPLGPGSALASYAYSRDSGGHDQTRRTWALGYDYPLSKRTDVYAAYMNDRYSGMSGGDTFGAGIRAK	357	BPSL0326
BKP2_00600	YTSPSFGGLNAAAMYALGN	BPSL0326	181	MKSSFSRALQTTFACAAVAALAAGASGACAQSSVQLYGQVDEWIGAQKFPGGQRAWGVQGGGMSTSYWGLRGTEDLGGGYQAIFTLEDFFRAQNGHYGRFDGDTFFGRNAYVGLATPYGTVRAGRLTTQLFISTILFNPFIDSYVFSPMVYHVFLGLGTFPTYTTDQGVVGDSGWNNAIDYTSPSFGGLNAAAMYALGNTAGDNRSKKWSGQLNYSSGPFAATAVYQYVNFNGGPGDLGALVSGMKSQGVAQLGLSYDFKLAKIYAQYMYTKNELNTGSWHVNTAQGGVSVPLGPGSALASYAYSRDSGGHDQTRRTWALGYDYPLSKRTDVYAAYMNDRYSGMSGGDTFGAGIRAK	357	BPSL0326
BKP2_00601	SPSFGGLNAAAMYALGNTA	BPSL0326	183	MKSSFSRALQTTFACAAVAALAAGASGACAQSSVQLYGQVDEWIGAQKFPGGQRAWGVQGGGMSTSYWGLRGTEDLGGGYQAIFTLEDFFRAQNGHYGRFDGDTFFGRNAYVGLATPYGTVRAGRLTTQLFISTILFNPFIDSYVFSPMVYHVFLGLGTFPTYTTDQGVVGDSGWNNAIDYTSPSFGGLNAAAMYALGNTAGDNRSKKWSGQLNYSSGPFAATAVYQYVNFNGGPGDLGALVSGMKSQGVAQLGLSYDFKLAKIYAQYMYTKNELNTGSWHVNTAQGGVSVPLGPGSALASYAYSRDSGGHDQTRRTWALGYDYPLSKRTDVYAAYMNDRYSGMSGGDTFGAGIRAK	357	BPSL0326
BKP2_00602	SFGGLNAAAMYALGNTAGD	BPSL0326	185	MKSSFSRALQTTFACAAVAALAAGASGACAQSSVQLYGQVDEWIGAQKFPGGQRAWGVQGGGMSTSYWGLRGTEDLGGGYQAIFTLEDFFRAQNGHYGRFDGDTFFGRNAYVGLATPYGTVRAGRLTTQLFISTILFNPFIDSYVFSPMVYHVFLGLGTFPTYTTDQGVVGDSGWNNAIDYTSPSFGGLNAAAMYALGNTAGDNRSKKWSGQLNYSSGPFAATAVYQYVNFNGGPGDLGALVSGMKSQGVAQLGLSYDFKLAKIYAQYMYTKNELNTGSWHVNTAQGGVSVPLGPGSALASYAYSRDSGGHDQTRRTWALGYDYPLSKRTDVYAAYMNDRYSGMSGGDTFGAGIRAK	357	BPSL0326
BKP2_00603	GGLNAAAMYALGNTAGDNR	BPSL0326	187	MKSSFSRALQTTFACAAVAALAAGASGACAQSSVQLYGQVDEWIGAQKFPGGQRAWGVQGGGMSTSYWGLRGTEDLGGGYQAIFTLEDFFRAQNGHYGRFDGDTFFGRNAYVGLATPYGTVRAGRLTTQLFISTILFNPFIDSYVFSPMVYHVFLGLGTFPTYTTDQGVVGDSGWNNAIDYTSPSFGGLNAAAMYALGNTAGDNRSKKWSGQLNYSSGPFAATAVYQYVNFNGGPGDLGALVSGMKSQGVAQLGLSYDFKLAKIYAQYMYTKNELNTGSWHVNTAQGGVSVPLGPGSALASYAYSRDSGGHDQTRRTWALGYDYPLSKRTDVYAAYMNDRYSGMSGGDTFGAGIRAK	357	BPSL0326
BKP2_00604	LNAAAMYALGNTAGDNRSK	BPSL0326	189	MKSSFSRALQTTFACAAVAALAAGASGACAQSSVQLYGQVDEWIGAQKFPGGQRAWGVQGGGMSTSYWGLRGTEDLGGGYQAIFTLEDFFRAQNGHYGRFDGDTFFGRNAYVGLATPYGTVRAGRLTTQLFISTILFNPFIDSYVFSPMVYHVFLGLGTFPTYTTDQGVVGDSGWNNAIDYTSPSFGGLNAAAMYALGNTAGDNRSKKWSGQLNYSSGPFAATAVYQYVNFNGGPGDLGALVSGMKSQGVAQLGLSYDFKLAKIYAQYMYTKNELNTGSWHVNTAQGGVSVPLGPGSALASYAYSRDSGGHDQTRRTWALGYDYPLSKRTDVYAAYMNDRYSGMSGGDTFGAGIRAK	357	BPSL0326
BKP2_00605	AAAMYALGNTAGDNRSKKW	BPSL0326	191	MKSSFSRALQTTFACAAVAALAAGASGACAQSSVQLYGQVDEWIGAQKFPGGQRAWGVQGGGMSTSYWGLRGTEDLGGGYQAIFTLEDFFRAQNGHYGRFDGDTFFGRNAYVGLATPYGTVRAGRLTTQLFISTILFNPFIDSYVFSPMVYHVFLGLGTFPTYTTDQGVVGDSGWNNAIDYTSPSFGGLNAAAMYALGNTAGDNRSKKWSGQLNYSSGPFAATAVYQYVNFNGGPGDLGALVSGMKSQGVAQLGLSYDFKLAKIYAQYMYTKNELNTGSWHVNTAQGGVSVPLGPGSALASYAYSRDSGGHDQTRRTWALGYDYPLSKRTDVYAAYMNDRYSGMSGGDTFGAGIRAK	357	BPSL0326
BKP2_00606	AMYALGNTAGDNRSKKWSG	BPSL0326	193	MKSSFSRALQTTFACAAVAALAAGASGACAQSSVQLYGQVDEWIGAQKFPGGQRAWGVQGGGMSTSYWGLRGTEDLGGGYQAIFTLEDFFRAQNGHYGRFDGDTFFGRNAYVGLATPYGTVRAGRLTTQLFISTILFNPFIDSYVFSPMVYHVFLGLGTFPTYTTDQGVVGDSGWNNAIDYTSPSFGGLNAAAMYALGNTAGDNRSKKWSGQLNYSSGPFAATAVYQYVNFNGGPGDLGALVSGMKSQGVAQLGLSYDFKLAKIYAQYMYTKNELNTGSWHVNTAQGGVSVPLGPGSALASYAYSRDSGGHDQTRRTWALGYDYPLSKRTDVYAAYMNDRYSGMSGGDTFGAGIRAK	357	BPSL0326
BKP2_00607	YALGNTAGDNRSKKWSGQL	BPSL0326	195	MKSSFSRALQTTFACAAVAALAAGASGACAQSSVQLYGQVDEWIGAQKFPGGQRAWGVQGGGMSTSYWGLRGTEDLGGGYQAIFTLEDFFRAQNGHYGRFDGDTFFGRNAYVGLATPYGTVRAGRLTTQLFISTILFNPFIDSYVFSPMVYHVFLGLGTFPTYTTDQGVVGDSGWNNAIDYTSPSFGGLNAAAMYALGNTAGDNRSKKWSGQLNYSSGPFAATAVYQYVNFNGGPGDLGALVSGMKSQGVAQLGLSYDFKLAKIYAQYMYTKNELNTGSWHVNTAQGGVSVPLGPGSALASYAYSRDSGGHDQTRRTWALGYDYPLSKRTDVYAAYMNDRYSGMSGGDTFGAGIRAK	357	BPSL0326
BKP2_00608	LGNTAGDNRSKKWSGQLNY	BPSL0326	197	MKSSFSRALQTTFACAAVAALAAGASGACAQSSVQLYGQVDEWIGAQKFPGGQRAWGVQGGGMSTSYWGLRGTEDLGGGYQAIFTLEDFFRAQNGHYGRFDGDTFFGRNAYVGLATPYGTVRAGRLTTQLFISTILFNPFIDSYVFSPMVYHVFLGLGTFPTYTTDQGVVGDSGWNNAIDYTSPSFGGLNAAAMYALGNTAGDNRSKKWSGQLNYSSGPFAATAVYQYVNFNGGPGDLGALVSGMKSQGVAQLGLSYDFKLAKIYAQYMYTKNELNTGSWHVNTAQGGVSVPLGPGSALASYAYSRDSGGHDQTRRTWALGYDYPLSKRTDVYAAYMNDRYSGMSGGDTFGAGIRAK	357	BPSL0326
BKP2_00609	NTAGDNRSKKWSGQLNYSS	BPSL0326	199	MKSSFSRALQTTFACAAVAALAAGASGACAQSSVQLYGQVDEWIGAQKFPGGQRAWGVQGGGMSTSYWGLRGTEDLGGGYQAIFTLEDFFRAQNGHYGRFDGDTFFGRNAYVGLATPYGTVRAGRLTTQLFISTILFNPFIDSYVFSPMVYHVFLGLGTFPTYTTDQGVVGDSGWNNAIDYTSPSFGGLNAAAMYALGNTAGDNRSKKWSGQLNYSSGPFAATAVYQYVNFNGGPGDLGALVSGMKSQGVAQLGLSYDFKLAKIYAQYMYTKNELNTGSWHVNTAQGGVSVPLGPGSALASYAYSRDSGGHDQTRRTWALGYDYPLSKRTDVYAAYMNDRYSGMSGGDTFGAGIRAK	357	BPSL0326
BKP2_00610	AGDNRSKKWSGQLNYSSGP	BPSL0326	201	MKSSFSRALQTTFACAAVAALAAGASGACAQSSVQLYGQVDEWIGAQKFPGGQRAWGVQGGGMSTSYWGLRGTEDLGGGYQAIFTLEDFFRAQNGHYGRFDGDTFFGRNAYVGLATPYGTVRAGRLTTQLFISTILFNPFIDSYVFSPMVYHVFLGLGTFPTYTTDQGVVGDSGWNNAIDYTSPSFGGLNAAAMYALGNTAGDNRSKKWSGQLNYSSGPFAATAVYQYVNFNGGPGDLGALVSGMKSQGVAQLGLSYDFKLAKIYAQYMYTKNELNTGSWHVNTAQGGVSVPLGPGSALASYAYSRDSGGHDQTRRTWALGYDYPLSKRTDVYAAYMNDRYSGMSGGDTFGAGIRAK	357	BPSL0326
BKP2_00611	DNRSKKWSGQLNYSSGPFA	BPSL0326	203	MKSSFSRALQTTFACAAVAALAAGASGACAQSSVQLYGQVDEWIGAQKFPGGQRAWGVQGGGMSTSYWGLRGTEDLGGGYQAIFTLEDFFRAQNGHYGRFDGDTFFGRNAYVGLATPYGTVRAGRLTTQLFISTILFNPFIDSYVFSPMVYHVFLGLGTFPTYTTDQGVVGDSGWNNAIDYTSPSFGGLNAAAMYALGNTAGDNRSKKWSGQLNYSSGPFAATAVYQYVNFNGGPGDLGALVSGMKSQGVAQLGLSYDFKLAKIYAQYMYTKNELNTGSWHVNTAQGGVSVPLGPGSALASYAYSRDSGGHDQTRRTWALGYDYPLSKRTDVYAAYMNDRYSGMSGGDTFGAGIRAK	357	BPSL0326
BKP2_00612	RSKKWSGQLNYSSGPFAAT	BPSL0326	205	MKSSFSRALQTTFACAAVAALAAGASGACAQSSVQLYGQVDEWIGAQKFPGGQRAWGVQGGGMSTSYWGLRGTEDLGGGYQAIFTLEDFFRAQNGHYGRFDGDTFFGRNAYVGLATPYGTVRAGRLTTQLFISTILFNPFIDSYVFSPMVYHVFLGLGTFPTYTTDQGVVGDSGWNNAIDYTSPSFGGLNAAAMYALGNTAGDNRSKKWSGQLNYSSGPFAATAVYQYVNFNGGPGDLGALVSGMKSQGVAQLGLSYDFKLAKIYAQYMYTKNELNTGSWHVNTAQGGVSVPLGPGSALASYAYSRDSGGHDQTRRTWALGYDYPLSKRTDVYAAYMNDRYSGMSGGDTFGAGIRAK	357	BPSL0326
BKP2_00613	KKWSGQLNYSSGPFAATAV	BPSL0326	207	MKSSFSRALQTTFACAAVAALAAGASGACAQSSVQLYGQVDEWIGAQKFPGGQRAWGVQGGGMSTSYWGLRGTEDLGGGYQAIFTLEDFFRAQNGHYGRFDGDTFFGRNAYVGLATPYGTVRAGRLTTQLFISTILFNPFIDSYVFSPMVYHVFLGLGTFPTYTTDQGVVGDSGWNNAIDYTSPSFGGLNAAAMYALGNTAGDNRSKKWSGQLNYSSGPFAATAVYQYVNFNGGPGDLGALVSGMKSQGVAQLGLSYDFKLAKIYAQYMYTKNELNTGSWHVNTAQGGVSVPLGPGSALASYAYSRDSGGHDQTRRTWALGYDYPLSKRTDVYAAYMNDRYSGMSGGDTFGAGIRAK	357	BPSL0326
BKP2_00614	WSGQLNYSSGPFAATAVYQ	BPSL0326	209	MKSSFSRALQTTFACAAVAALAAGASGACAQSSVQLYGQVDEWIGAQKFPGGQRAWGVQGGGMSTSYWGLRGTEDLGGGYQAIFTLEDFFRAQNGHYGRFDGDTFFGRNAYVGLATPYGTVRAGRLTTQLFISTILFNPFIDSYVFSPMVYHVFLGLGTFPTYTTDQGVVGDSGWNNAIDYTSPSFGGLNAAAMYALGNTAGDNRSKKWSGQLNYSSGPFAATAVYQYVNFNGGPGDLGALVSGMKSQGVAQLGLSYDFKLAKIYAQYMYTKNELNTGSWHVNTAQGGVSVPLGPGSALASYAYSRDSGGHDQTRRTWALGYDYPLSKRTDVYAAYMNDRYSGMSGGDTFGAGIRAK	357	BPSL0326
BKP2_00615	GQLNYSSGPFAATAVYQYV	BPSL0326	211	MKSSFSRALQTTFACAAVAALAAGASGACAQSSVQLYGQVDEWIGAQKFPGGQRAWGVQGGGMSTSYWGLRGTEDLGGGYQAIFTLEDFFRAQNGHYGRFDGDTFFGRNAYVGLATPYGTVRAGRLTTQLFISTILFNPFIDSYVFSPMVYHVFLGLGTFPTYTTDQGVVGDSGWNNAIDYTSPSFGGLNAAAMYALGNTAGDNRSKKWSGQLNYSSGPFAATAVYQYVNFNGGPGDLGALVSGMKSQGVAQLGLSYDFKLAKIYAQYMYTKNELNTGSWHVNTAQGGVSVPLGPGSALASYAYSRDSGGHDQTRRTWALGYDYPLSKRTDVYAAYMNDRYSGMSGGDTFGAGIRAK	357	BPSL0326
BKP2_00616	LNYSSGPFAATAVYQYVNF	BPSL0326	213	MKSSFSRALQTTFACAAVAALAAGASGACAQSSVQLYGQVDEWIGAQKFPGGQRAWGVQGGGMSTSYWGLRGTEDLGGGYQAIFTLEDFFRAQNGHYGRFDGDTFFGRNAYVGLATPYGTVRAGRLTTQLFISTILFNPFIDSYVFSPMVYHVFLGLGTFPTYTTDQGVVGDSGWNNAIDYTSPSFGGLNAAAMYALGNTAGDNRSKKWSGQLNYSSGPFAATAVYQYVNFNGGPGDLGALVSGMKSQGVAQLGLSYDFKLAKIYAQYMYTKNELNTGSWHVNTAQGGVSVPLGPGSALASYAYSRDSGGHDQTRRTWALGYDYPLSKRTDVYAAYMNDRYSGMSGGDTFGAGIRAK	357	BPSL0326
BKP2_00617	YSSGPFAATAVYQYVNFNG	BPSL0326	215	MKSSFSRALQTTFACAAVAALAAGASGACAQSSVQLYGQVDEWIGAQKFPGGQRAWGVQGGGMSTSYWGLRGTEDLGGGYQAIFTLEDFFRAQNGHYGRFDGDTFFGRNAYVGLATPYGTVRAGRLTTQLFISTILFNPFIDSYVFSPMVYHVFLGLGTFPTYTTDQGVVGDSGWNNAIDYTSPSFGGLNAAAMYALGNTAGDNRSKKWSGQLNYSSGPFAATAVYQYVNFNGGPGDLGALVSGMKSQGVAQLGLSYDFKLAKIYAQYMYTKNELNTGSWHVNTAQGGVSVPLGPGSALASYAYSRDSGGHDQTRRTWALGYDYPLSKRTDVYAAYMNDRYSGMSGGDTFGAGIRAK	357	BPSL0326
BKP2_00618	SGPFAATAVYQYVNFNGGP	BPSL0326	217	MKSSFSRALQTTFACAAVAALAAGASGACAQSSVQLYGQVDEWIGAQKFPGGQRAWGVQGGGMSTSYWGLRGTEDLGGGYQAIFTLEDFFRAQNGHYGRFDGDTFFGRNAYVGLATPYGTVRAGRLTTQLFISTILFNPFIDSYVFSPMVYHVFLGLGTFPTYTTDQGVVGDSGWNNAIDYTSPSFGGLNAAAMYALGNTAGDNRSKKWSGQLNYSSGPFAATAVYQYVNFNGGPGDLGALVSGMKSQGVAQLGLSYDFKLAKIYAQYMYTKNELNTGSWHVNTAQGGVSVPLGPGSALASYAYSRDSGGHDQTRRTWALGYDYPLSKRTDVYAAYMNDRYSGMSGGDTFGAGIRAK	357	BPSL0326
BKP2_00619	PFAATAVYQYVNFNGGPGD	BPSL0326	219	MKSSFSRALQTTFACAAVAALAAGASGACAQSSVQLYGQVDEWIGAQKFPGGQRAWGVQGGGMSTSYWGLRGTEDLGGGYQAIFTLEDFFRAQNGHYGRFDGDTFFGRNAYVGLATPYGTVRAGRLTTQLFISTILFNPFIDSYVFSPMVYHVFLGLGTFPTYTTDQGVVGDSGWNNAIDYTSPSFGGLNAAAMYALGNTAGDNRSKKWSGQLNYSSGPFAATAVYQYVNFNGGPGDLGALVSGMKSQGVAQLGLSYDFKLAKIYAQYMYTKNELNTGSWHVNTAQGGVSVPLGPGSALASYAYSRDSGGHDQTRRTWALGYDYPLSKRTDVYAAYMNDRYSGMSGGDTFGAGIRAK	357	BPSL0326
BKP2_00620	AATAVYQYVNFNGGPGDLG	BPSL0326	221	MKSSFSRALQTTFACAAVAALAAGASGACAQSSVQLYGQVDEWIGAQKFPGGQRAWGVQGGGMSTSYWGLRGTEDLGGGYQAIFTLEDFFRAQNGHYGRFDGDTFFGRNAYVGLATPYGTVRAGRLTTQLFISTILFNPFIDSYVFSPMVYHVFLGLGTFPTYTTDQGVVGDSGWNNAIDYTSPSFGGLNAAAMYALGNTAGDNRSKKWSGQLNYSSGPFAATAVYQYVNFNGGPGDLGALVSGMKSQGVAQLGLSYDFKLAKIYAQYMYTKNELNTGSWHVNTAQGGVSVPLGPGSALASYAYSRDSGGHDQTRRTWALGYDYPLSKRTDVYAAYMNDRYSGMSGGDTFGAGIRAK	357	BPSL0326
BKP2_00621	TAVYQYVNFNGGPGDLGAL	BPSL0326	223	MKSSFSRALQTTFACAAVAALAAGASGACAQSSVQLYGQVDEWIGAQKFPGGQRAWGVQGGGMSTSYWGLRGTEDLGGGYQAIFTLEDFFRAQNGHYGRFDGDTFFGRNAYVGLATPYGTVRAGRLTTQLFISTILFNPFIDSYVFSPMVYHVFLGLGTFPTYTTDQGVVGDSGWNNAIDYTSPSFGGLNAAAMYALGNTAGDNRSKKWSGQLNYSSGPFAATAVYQYVNFNGGPGDLGALVSGMKSQGVAQLGLSYDFKLAKIYAQYMYTKNELNTGSWHVNTAQGGVSVPLGPGSALASYAYSRDSGGHDQTRRTWALGYDYPLSKRTDVYAAYMNDRYSGMSGGDTFGAGIRAK	357	BPSL0326
BKP2_00622	VYQYVNFNGGPGDLGALVS	BPSL0326	225	MKSSFSRALQTTFACAAVAALAAGASGACAQSSVQLYGQVDEWIGAQKFPGGQRAWGVQGGGMSTSYWGLRGTEDLGGGYQAIFTLEDFFRAQNGHYGRFDGDTFFGRNAYVGLATPYGTVRAGRLTTQLFISTILFNPFIDSYVFSPMVYHVFLGLGTFPTYTTDQGVVGDSGWNNAIDYTSPSFGGLNAAAMYALGNTAGDNRSKKWSGQLNYSSGPFAATAVYQYVNFNGGPGDLGALVSGMKSQGVAQLGLSYDFKLAKIYAQYMYTKNELNTGSWHVNTAQGGVSVPLGPGSALASYAYSRDSGGHDQTRRTWALGYDYPLSKRTDVYAAYMNDRYSGMSGGDTFGAGIRAK	357	BPSL0326
BKP2_00623	QYVNFNGGPGDLGALVSGM	BPSL0326	227	MKSSFSRALQTTFACAAVAALAAGASGACAQSSVQLYGQVDEWIGAQKFPGGQRAWGVQGGGMSTSYWGLRGTEDLGGGYQAIFTLEDFFRAQNGHYGRFDGDTFFGRNAYVGLATPYGTVRAGRLTTQLFISTILFNPFIDSYVFSPMVYHVFLGLGTFPTYTTDQGVVGDSGWNNAIDYTSPSFGGLNAAAMYALGNTAGDNRSKKWSGQLNYSSGPFAATAVYQYVNFNGGPGDLGALVSGMKSQGVAQLGLSYDFKLAKIYAQYMYTKNELNTGSWHVNTAQGGVSVPLGPGSALASYAYSRDSGGHDQTRRTWALGYDYPLSKRTDVYAAYMNDRYSGMSGGDTFGAGIRAK	357	BPSL0326
BKP2_00624	VNFNGGPGDLGALVSGMKS	BPSL0326	229	MKSSFSRALQTTFACAAVAALAAGASGACAQSSVQLYGQVDEWIGAQKFPGGQRAWGVQGGGMSTSYWGLRGTEDLGGGYQAIFTLEDFFRAQNGHYGRFDGDTFFGRNAYVGLATPYGTVRAGRLTTQLFISTILFNPFIDSYVFSPMVYHVFLGLGTFPTYTTDQGVVGDSGWNNAIDYTSPSFGGLNAAAMYALGNTAGDNRSKKWSGQLNYSSGPFAATAVYQYVNFNGGPGDLGALVSGMKSQGVAQLGLSYDFKLAKIYAQYMYTKNELNTGSWHVNTAQGGVSVPLGPGSALASYAYSRDSGGHDQTRRTWALGYDYPLSKRTDVYAAYMNDRYSGMSGGDTFGAGIRAK	357	BPSL0326
BKP2_00625	FNGGPGDLGALVSGMKSQG	BPSL0326	231	MKSSFSRALQTTFACAAVAALAAGASGACAQSSVQLYGQVDEWIGAQKFPGGQRAWGVQGGGMSTSYWGLRGTEDLGGGYQAIFTLEDFFRAQNGHYGRFDGDTFFGRNAYVGLATPYGTVRAGRLTTQLFISTILFNPFIDSYVFSPMVYHVFLGLGTFPTYTTDQGVVGDSGWNNAIDYTSPSFGGLNAAAMYALGNTAGDNRSKKWSGQLNYSSGPFAATAVYQYVNFNGGPGDLGALVSGMKSQGVAQLGLSYDFKLAKIYAQYMYTKNELNTGSWHVNTAQGGVSVPLGPGSALASYAYSRDSGGHDQTRRTWALGYDYPLSKRTDVYAAYMNDRYSGMSGGDTFGAGIRAK	357	BPSL0326
BKP2_00626	GGPGDLGALVSGMKSQGVA	BPSL0326	233	MKSSFSRALQTTFACAAVAALAAGASGACAQSSVQLYGQVDEWIGAQKFPGGQRAWGVQGGGMSTSYWGLRGTEDLGGGYQAIFTLEDFFRAQNGHYGRFDGDTFFGRNAYVGLATPYGTVRAGRLTTQLFISTILFNPFIDSYVFSPMVYHVFLGLGTFPTYTTDQGVVGDSGWNNAIDYTSPSFGGLNAAAMYALGNTAGDNRSKKWSGQLNYSSGPFAATAVYQYVNFNGGPGDLGALVSGMKSQGVAQLGLSYDFKLAKIYAQYMYTKNELNTGSWHVNTAQGGVSVPLGPGSALASYAYSRDSGGHDQTRRTWALGYDYPLSKRTDVYAAYMNDRYSGMSGGDTFGAGIRAK	357	BPSL0326
BKP2_00627	PGDLGALVSGMKSQGVAQL	BPSL0326	235	MKSSFSRALQTTFACAAVAALAAGASGACAQSSVQLYGQVDEWIGAQKFPGGQRAWGVQGGGMSTSYWGLRGTEDLGGGYQAIFTLEDFFRAQNGHYGRFDGDTFFGRNAYVGLATPYGTVRAGRLTTQLFISTILFNPFIDSYVFSPMVYHVFLGLGTFPTYTTDQGVVGDSGWNNAIDYTSPSFGGLNAAAMYALGNTAGDNRSKKWSGQLNYSSGPFAATAVYQYVNFNGGPGDLGALVSGMKSQGVAQLGLSYDFKLAKIYAQYMYTKNELNTGSWHVNTAQGGVSVPLGPGSALASYAYSRDSGGHDQTRRTWALGYDYPLSKRTDVYAAYMNDRYSGMSGGDTFGAGIRAK	357	BPSL0326
BKP2_00628	DLGALVSGMKSQGVAQLGL	BPSL0326	237	MKSSFSRALQTTFACAAVAALAAGASGACAQSSVQLYGQVDEWIGAQKFPGGQRAWGVQGGGMSTSYWGLRGTEDLGGGYQAIFTLEDFFRAQNGHYGRFDGDTFFGRNAYVGLATPYGTVRAGRLTTQLFISTILFNPFIDSYVFSPMVYHVFLGLGTFPTYTTDQGVVGDSGWNNAIDYTSPSFGGLNAAAMYALGNTAGDNRSKKWSGQLNYSSGPFAATAVYQYVNFNGGPGDLGALVSGMKSQGVAQLGLSYDFKLAKIYAQYMYTKNELNTGSWHVNTAQGGVSVPLGPGSALASYAYSRDSGGHDQTRRTWALGYDYPLSKRTDVYAAYMNDRYSGMSGGDTFGAGIRAK	357	BPSL0326
BKP2_00629	GALVSGMKSQGVAQLGLSY	BPSL0326	239	MKSSFSRALQTTFACAAVAALAAGASGACAQSSVQLYGQVDEWIGAQKFPGGQRAWGVQGGGMSTSYWGLRGTEDLGGGYQAIFTLEDFFRAQNGHYGRFDGDTFFGRNAYVGLATPYGTVRAGRLTTQLFISTILFNPFIDSYVFSPMVYHVFLGLGTFPTYTTDQGVVGDSGWNNAIDYTSPSFGGLNAAAMYALGNTAGDNRSKKWSGQLNYSSGPFAATAVYQYVNFNGGPGDLGALVSGMKSQGVAQLGLSYDFKLAKIYAQYMYTKNELNTGSWHVNTAQGGVSVPLGPGSALASYAYSRDSGGHDQTRRTWALGYDYPLSKRTDVYAAYMNDRYSGMSGGDTFGAGIRAK	357	BPSL0326
BKP2_00630	LVSGMKSQGVAQLGLSYDF	BPSL0326	241	MKSSFSRALQTTFACAAVAALAAGASGACAQSSVQLYGQVDEWIGAQKFPGGQRAWGVQGGGMSTSYWGLRGTEDLGGGYQAIFTLEDFFRAQNGHYGRFDGDTFFGRNAYVGLATPYGTVRAGRLTTQLFISTILFNPFIDSYVFSPMVYHVFLGLGTFPTYTTDQGVVGDSGWNNAIDYTSPSFGGLNAAAMYALGNTAGDNRSKKWSGQLNYSSGPFAATAVYQYVNFNGGPGDLGALVSGMKSQGVAQLGLSYDFKLAKIYAQYMYTKNELNTGSWHVNTAQGGVSVPLGPGSALASYAYSRDSGGHDQTRRTWALGYDYPLSKRTDVYAAYMNDRYSGMSGGDTFGAGIRAK	357	BPSL0326
BKP2_00631	SGMKSQGVAQLGLSYDFKL	BPSL0326	243	MKSSFSRALQTTFACAAVAALAAGASGACAQSSVQLYGQVDEWIGAQKFPGGQRAWGVQGGGMSTSYWGLRGTEDLGGGYQAIFTLEDFFRAQNGHYGRFDGDTFFGRNAYVGLATPYGTVRAGRLTTQLFISTILFNPFIDSYVFSPMVYHVFLGLGTFPTYTTDQGVVGDSGWNNAIDYTSPSFGGLNAAAMYALGNTAGDNRSKKWSGQLNYSSGPFAATAVYQYVNFNGGPGDLGALVSGMKSQGVAQLGLSYDFKLAKIYAQYMYTKNELNTGSWHVNTAQGGVSVPLGPGSALASYAYSRDSGGHDQTRRTWALGYDYPLSKRTDVYAAYMNDRYSGMSGGDTFGAGIRAK	357	BPSL0326
BKP2_00632	MKSQGVAQLGLSYDFKLAK	BPSL0326	245	MKSSFSRALQTTFACAAVAALAAGASGACAQSSVQLYGQVDEWIGAQKFPGGQRAWGVQGGGMSTSYWGLRGTEDLGGGYQAIFTLEDFFRAQNGHYGRFDGDTFFGRNAYVGLATPYGTVRAGRLTTQLFISTILFNPFIDSYVFSPMVYHVFLGLGTFPTYTTDQGVVGDSGWNNAIDYTSPSFGGLNAAAMYALGNTAGDNRSKKWSGQLNYSSGPFAATAVYQYVNFNGGPGDLGALVSGMKSQGVAQLGLSYDFKLAKIYAQYMYTKNELNTGSWHVNTAQGGVSVPLGPGSALASYAYSRDSGGHDQTRRTWALGYDYPLSKRTDVYAAYMNDRYSGMSGGDTFGAGIRAK	357	BPSL0326
BKP2_00633	SQGVAQLGLSYDFKLAKIY	BPSL0326	247	MKSSFSRALQTTFACAAVAALAAGASGACAQSSVQLYGQVDEWIGAQKFPGGQRAWGVQGGGMSTSYWGLRGTEDLGGGYQAIFTLEDFFRAQNGHYGRFDGDTFFGRNAYVGLATPYGTVRAGRLTTQLFISTILFNPFIDSYVFSPMVYHVFLGLGTFPTYTTDQGVVGDSGWNNAIDYTSPSFGGLNAAAMYALGNTAGDNRSKKWSGQLNYSSGPFAATAVYQYVNFNGGPGDLGALVSGMKSQGVAQLGLSYDFKLAKIYAQYMYTKNELNTGSWHVNTAQGGVSVPLGPGSALASYAYSRDSGGHDQTRRTWALGYDYPLSKRTDVYAAYMNDRYSGMSGGDTFGAGIRAK	357	BPSL0326
BKP2_00634	GVAQLGLSYDFKLAKIYAQ	BPSL0326	249	MKSSFSRALQTTFACAAVAALAAGASGACAQSSVQLYGQVDEWIGAQKFPGGQRAWGVQGGGMSTSYWGLRGTEDLGGGYQAIFTLEDFFRAQNGHYGRFDGDTFFGRNAYVGLATPYGTVRAGRLTTQLFISTILFNPFIDSYVFSPMVYHVFLGLGTFPTYTTDQGVVGDSGWNNAIDYTSPSFGGLNAAAMYALGNTAGDNRSKKWSGQLNYSSGPFAATAVYQYVNFNGGPGDLGALVSGMKSQGVAQLGLSYDFKLAKIYAQYMYTKNELNTGSWHVNTAQGGVSVPLGPGSALASYAYSRDSGGHDQTRRTWALGYDYPLSKRTDVYAAYMNDRYSGMSGGDTFGAGIRAK	357	BPSL0326
BKP2_00635	AQLGLSYDFKLAKIYAQYM	BPSL0326	251	MKSSFSRALQTTFACAAVAALAAGASGACAQSSVQLYGQVDEWIGAQKFPGGQRAWGVQGGGMSTSYWGLRGTEDLGGGYQAIFTLEDFFRAQNGHYGRFDGDTFFGRNAYVGLATPYGTVRAGRLTTQLFISTILFNPFIDSYVFSPMVYHVFLGLGTFPTYTTDQGVVGDSGWNNAIDYTSPSFGGLNAAAMYALGNTAGDNRSKKWSGQLNYSSGPFAATAVYQYVNFNGGPGDLGALVSGMKSQGVAQLGLSYDFKLAKIYAQYMYTKNELNTGSWHVNTAQGGVSVPLGPGSALASYAYSRDSGGHDQTRRTWALGYDYPLSKRTDVYAAYMNDRYSGMSGGDTFGAGIRAK	357	BPSL0326
BKP2_00636	LGLSYDFKLAKIYAQYMYT	BPSL0326	253	MKSSFSRALQTTFACAAVAALAAGASGACAQSSVQLYGQVDEWIGAQKFPGGQRAWGVQGGGMSTSYWGLRGTEDLGGGYQAIFTLEDFFRAQNGHYGRFDGDTFFGRNAYVGLATPYGTVRAGRLTTQLFISTILFNPFIDSYVFSPMVYHVFLGLGTFPTYTTDQGVVGDSGWNNAIDYTSPSFGGLNAAAMYALGNTAGDNRSKKWSGQLNYSSGPFAATAVYQYVNFNGGPGDLGALVSGMKSQGVAQLGLSYDFKLAKIYAQYMYTKNELNTGSWHVNTAQGGVSVPLGPGSALASYAYSRDSGGHDQTRRTWALGYDYPLSKRTDVYAAYMNDRYSGMSGGDTFGAGIRAK	357	BPSL0326
BKP2_00637	LSYDFKLAKIYAQYMYTKN	BPSL0326	255	MKSSFSRALQTTFACAAVAALAAGASGACAQSSVQLYGQVDEWIGAQKFPGGQRAWGVQGGGMSTSYWGLRGTEDLGGGYQAIFTLEDFFRAQNGHYGRFDGDTFFGRNAYVGLATPYGTVRAGRLTTQLFISTILFNPFIDSYVFSPMVYHVFLGLGTFPTYTTDQGVVGDSGWNNAIDYTSPSFGGLNAAAMYALGNTAGDNRSKKWSGQLNYSSGPFAATAVYQYVNFNGGPGDLGALVSGMKSQGVAQLGLSYDFKLAKIYAQYMYTKNELNTGSWHVNTAQGGVSVPLGPGSALASYAYSRDSGGHDQTRRTWALGYDYPLSKRTDVYAAYMNDRYSGMSGGDTFGAGIRAK	357	BPSL0326
BKP2_00638	YDFKLAKIYAQYMYTKNEL	BPSL0326	257	MKSSFSRALQTTFACAAVAALAAGASGACAQSSVQLYGQVDEWIGAQKFPGGQRAWGVQGGGMSTSYWGLRGTEDLGGGYQAIFTLEDFFRAQNGHYGRFDGDTFFGRNAYVGLATPYGTVRAGRLTTQLFISTILFNPFIDSYVFSPMVYHVFLGLGTFPTYTTDQGVVGDSGWNNAIDYTSPSFGGLNAAAMYALGNTAGDNRSKKWSGQLNYSSGPFAATAVYQYVNFNGGPGDLGALVSGMKSQGVAQLGLSYDFKLAKIYAQYMYTKNELNTGSWHVNTAQGGVSVPLGPGSALASYAYSRDSGGHDQTRRTWALGYDYPLSKRTDVYAAYMNDRYSGMSGGDTFGAGIRAK	357	BPSL0326
BKP2_00639	FKLAKIYAQYMYTKNELNT	BPSL0326	259	MKSSFSRALQTTFACAAVAALAAGASGACAQSSVQLYGQVDEWIGAQKFPGGQRAWGVQGGGMSTSYWGLRGTEDLGGGYQAIFTLEDFFRAQNGHYGRFDGDTFFGRNAYVGLATPYGTVRAGRLTTQLFISTILFNPFIDSYVFSPMVYHVFLGLGTFPTYTTDQGVVGDSGWNNAIDYTSPSFGGLNAAAMYALGNTAGDNRSKKWSGQLNYSSGPFAATAVYQYVNFNGGPGDLGALVSGMKSQGVAQLGLSYDFKLAKIYAQYMYTKNELNTGSWHVNTAQGGVSVPLGPGSALASYAYSRDSGGHDQTRRTWALGYDYPLSKRTDVYAAYMNDRYSGMSGGDTFGAGIRAK	357	BPSL0326
BKP2_00640	LAKIYAQYMYTKNELNTGS	BPSL0326	261	MKSSFSRALQTTFACAAVAALAAGASGACAQSSVQLYGQVDEWIGAQKFPGGQRAWGVQGGGMSTSYWGLRGTEDLGGGYQAIFTLEDFFRAQNGHYGRFDGDTFFGRNAYVGLATPYGTVRAGRLTTQLFISTILFNPFIDSYVFSPMVYHVFLGLGTFPTYTTDQGVVGDSGWNNAIDYTSPSFGGLNAAAMYALGNTAGDNRSKKWSGQLNYSSGPFAATAVYQYVNFNGGPGDLGALVSGMKSQGVAQLGLSYDFKLAKIYAQYMYTKNELNTGSWHVNTAQGGVSVPLGPGSALASYAYSRDSGGHDQTRRTWALGYDYPLSKRTDVYAAYMNDRYSGMSGGDTFGAGIRAK	357	BPSL0326
BKP2_00641	KIYAQYMYTKNELNTGSWH	BPSL0326	263	MKSSFSRALQTTFACAAVAALAAGASGACAQSSVQLYGQVDEWIGAQKFPGGQRAWGVQGGGMSTSYWGLRGTEDLGGGYQAIFTLEDFFRAQNGHYGRFDGDTFFGRNAYVGLATPYGTVRAGRLTTQLFISTILFNPFIDSYVFSPMVYHVFLGLGTFPTYTTDQGVVGDSGWNNAIDYTSPSFGGLNAAAMYALGNTAGDNRSKKWSGQLNYSSGPFAATAVYQYVNFNGGPGDLGALVSGMKSQGVAQLGLSYDFKLAKIYAQYMYTKNELNTGSWHVNTAQGGVSVPLGPGSALASYAYSRDSGGHDQTRRTWALGYDYPLSKRTDVYAAYMNDRYSGMSGGDTFGAGIRAK	357	BPSL0326
BKP2_00642	YAQYMYTKNELNTGSWHVN	BPSL0326	265	MKSSFSRALQTTFACAAVAALAAGASGACAQSSVQLYGQVDEWIGAQKFPGGQRAWGVQGGGMSTSYWGLRGTEDLGGGYQAIFTLEDFFRAQNGHYGRFDGDTFFGRNAYVGLATPYGTVRAGRLTTQLFISTILFNPFIDSYVFSPMVYHVFLGLGTFPTYTTDQGVVGDSGWNNAIDYTSPSFGGLNAAAMYALGNTAGDNRSKKWSGQLNYSSGPFAATAVYQYVNFNGGPGDLGALVSGMKSQGVAQLGLSYDFKLAKIYAQYMYTKNELNTGSWHVNTAQGGVSVPLGPGSALASYAYSRDSGGHDQTRRTWALGYDYPLSKRTDVYAAYMNDRYSGMSGGDTFGAGIRAK	357	BPSL0326
BKP2_00643	QYMYTKNELNTGSWHVNTA	BPSL0326	267	MKSSFSRALQTTFACAAVAALAAGASGACAQSSVQLYGQVDEWIGAQKFPGGQRAWGVQGGGMSTSYWGLRGTEDLGGGYQAIFTLEDFFRAQNGHYGRFDGDTFFGRNAYVGLATPYGTVRAGRLTTQLFISTILFNPFIDSYVFSPMVYHVFLGLGTFPTYTTDQGVVGDSGWNNAIDYTSPSFGGLNAAAMYALGNTAGDNRSKKWSGQLNYSSGPFAATAVYQYVNFNGGPGDLGALVSGMKSQGVAQLGLSYDFKLAKIYAQYMYTKNELNTGSWHVNTAQGGVSVPLGPGSALASYAYSRDSGGHDQTRRTWALGYDYPLSKRTDVYAAYMNDRYSGMSGGDTFGAGIRAK	357	BPSL0326
BKP2_00644	MYTKNELNTGSWHVNTAQG	BPSL0326	269	MKSSFSRALQTTFACAAVAALAAGASGACAQSSVQLYGQVDEWIGAQKFPGGQRAWGVQGGGMSTSYWGLRGTEDLGGGYQAIFTLEDFFRAQNGHYGRFDGDTFFGRNAYVGLATPYGTVRAGRLTTQLFISTILFNPFIDSYVFSPMVYHVFLGLGTFPTYTTDQGVVGDSGWNNAIDYTSPSFGGLNAAAMYALGNTAGDNRSKKWSGQLNYSSGPFAATAVYQYVNFNGGPGDLGALVSGMKSQGVAQLGLSYDFKLAKIYAQYMYTKNELNTGSWHVNTAQGGVSVPLGPGSALASYAYSRDSGGHDQTRRTWALGYDYPLSKRTDVYAAYMNDRYSGMSGGDTFGAGIRAK	357	BPSL0326
BKP2_00645	TKNELNTGSWHVNTAQGGV	BPSL0326	271	MKSSFSRALQTTFACAAVAALAAGASGACAQSSVQLYGQVDEWIGAQKFPGGQRAWGVQGGGMSTSYWGLRGTEDLGGGYQAIFTLEDFFRAQNGHYGRFDGDTFFGRNAYVGLATPYGTVRAGRLTTQLFISTILFNPFIDSYVFSPMVYHVFLGLGTFPTYTTDQGVVGDSGWNNAIDYTSPSFGGLNAAAMYALGNTAGDNRSKKWSGQLNYSSGPFAATAVYQYVNFNGGPGDLGALVSGMKSQGVAQLGLSYDFKLAKIYAQYMYTKNELNTGSWHVNTAQGGVSVPLGPGSALASYAYSRDSGGHDQTRRTWALGYDYPLSKRTDVYAAYMNDRYSGMSGGDTFGAGIRAK	357	BPSL0326
BKP2_00646	NELNTGSWHVNTAQGGVSV	BPSL0326	273	MKSSFSRALQTTFACAAVAALAAGASGACAQSSVQLYGQVDEWIGAQKFPGGQRAWGVQGGGMSTSYWGLRGTEDLGGGYQAIFTLEDFFRAQNGHYGRFDGDTFFGRNAYVGLATPYGTVRAGRLTTQLFISTILFNPFIDSYVFSPMVYHVFLGLGTFPTYTTDQGVVGDSGWNNAIDYTSPSFGGLNAAAMYALGNTAGDNRSKKWSGQLNYSSGPFAATAVYQYVNFNGGPGDLGALVSGMKSQGVAQLGLSYDFKLAKIYAQYMYTKNELNTGSWHVNTAQGGVSVPLGPGSALASYAYSRDSGGHDQTRRTWALGYDYPLSKRTDVYAAYMNDRYSGMSGGDTFGAGIRAK	357	BPSL0326
BKP2_00647	LNTGSWHVNTAQGGVSVPL	BPSL0326	275	MKSSFSRALQTTFACAAVAALAAGASGACAQSSVQLYGQVDEWIGAQKFPGGQRAWGVQGGGMSTSYWGLRGTEDLGGGYQAIFTLEDFFRAQNGHYGRFDGDTFFGRNAYVGLATPYGTVRAGRLTTQLFISTILFNPFIDSYVFSPMVYHVFLGLGTFPTYTTDQGVVGDSGWNNAIDYTSPSFGGLNAAAMYALGNTAGDNRSKKWSGQLNYSSGPFAATAVYQYVNFNGGPGDLGALVSGMKSQGVAQLGLSYDFKLAKIYAQYMYTKNELNTGSWHVNTAQGGVSVPLGPGSALASYAYSRDSGGHDQTRRTWALGYDYPLSKRTDVYAAYMNDRYSGMSGGDTFGAGIRAK	357	BPSL0326
BKP2_00648	TGSWHVNTAQGGVSVPLGP	BPSL0326	277	MKSSFSRALQTTFACAAVAALAAGASGACAQSSVQLYGQVDEWIGAQKFPGGQRAWGVQGGGMSTSYWGLRGTEDLGGGYQAIFTLEDFFRAQNGHYGRFDGDTFFGRNAYVGLATPYGTVRAGRLTTQLFISTILFNPFIDSYVFSPMVYHVFLGLGTFPTYTTDQGVVGDSGWNNAIDYTSPSFGGLNAAAMYALGNTAGDNRSKKWSGQLNYSSGPFAATAVYQYVNFNGGPGDLGALVSGMKSQGVAQLGLSYDFKLAKIYAQYMYTKNELNTGSWHVNTAQGGVSVPLGPGSALASYAYSRDSGGHDQTRRTWALGYDYPLSKRTDVYAAYMNDRYSGMSGGDTFGAGIRAK	357	BPSL0326
BKP2_00649	SWHVNTAQGGVSVPLGPGS	BPSL0326	279	MKSSFSRALQTTFACAAVAALAAGASGACAQSSVQLYGQVDEWIGAQKFPGGQRAWGVQGGGMSTSYWGLRGTEDLGGGYQAIFTLEDFFRAQNGHYGRFDGDTFFGRNAYVGLATPYGTVRAGRLTTQLFISTILFNPFIDSYVFSPMVYHVFLGLGTFPTYTTDQGVVGDSGWNNAIDYTSPSFGGLNAAAMYALGNTAGDNRSKKWSGQLNYSSGPFAATAVYQYVNFNGGPGDLGALVSGMKSQGVAQLGLSYDFKLAKIYAQYMYTKNELNTGSWHVNTAQGGVSVPLGPGSALASYAYSRDSGGHDQTRRTWALGYDYPLSKRTDVYAAYMNDRYSGMSGGDTFGAGIRAK	357	BPSL0326
BKP2_00650	HVNTAQGGVSVPLGPGSAL	BPSL0326	281	MKSSFSRALQTTFACAAVAALAAGASGACAQSSVQLYGQVDEWIGAQKFPGGQRAWGVQGGGMSTSYWGLRGTEDLGGGYQAIFTLEDFFRAQNGHYGRFDGDTFFGRNAYVGLATPYGTVRAGRLTTQLFISTILFNPFIDSYVFSPMVYHVFLGLGTFPTYTTDQGVVGDSGWNNAIDYTSPSFGGLNAAAMYALGNTAGDNRSKKWSGQLNYSSGPFAATAVYQYVNFNGGPGDLGALVSGMKSQGVAQLGLSYDFKLAKIYAQYMYTKNELNTGSWHVNTAQGGVSVPLGPGSALASYAYSRDSGGHDQTRRTWALGYDYPLSKRTDVYAAYMNDRYSGMSGGDTFGAGIRAK	357	BPSL0326
BKP2_00651	NTAQGGVSVPLGPGSALAS	BPSL0326	283	MKSSFSRALQTTFACAAVAALAAGASGACAQSSVQLYGQVDEWIGAQKFPGGQRAWGVQGGGMSTSYWGLRGTEDLGGGYQAIFTLEDFFRAQNGHYGRFDGDTFFGRNAYVGLATPYGTVRAGRLTTQLFISTILFNPFIDSYVFSPMVYHVFLGLGTFPTYTTDQGVVGDSGWNNAIDYTSPSFGGLNAAAMYALGNTAGDNRSKKWSGQLNYSSGPFAATAVYQYVNFNGGPGDLGALVSGMKSQGVAQLGLSYDFKLAKIYAQYMYTKNELNTGSWHVNTAQGGVSVPLGPGSALASYAYSRDSGGHDQTRRTWALGYDYPLSKRTDVYAAYMNDRYSGMSGGDTFGAGIRAK	357	BPSL0326
BKP2_00652	AQGGVSVPLGPGSALASYA	BPSL0326	285	MKSSFSRALQTTFACAAVAALAAGASGACAQSSVQLYGQVDEWIGAQKFPGGQRAWGVQGGGMSTSYWGLRGTEDLGGGYQAIFTLEDFFRAQNGHYGRFDGDTFFGRNAYVGLATPYGTVRAGRLTTQLFISTILFNPFIDSYVFSPMVYHVFLGLGTFPTYTTDQGVVGDSGWNNAIDYTSPSFGGLNAAAMYALGNTAGDNRSKKWSGQLNYSSGPFAATAVYQYVNFNGGPGDLGALVSGMKSQGVAQLGLSYDFKLAKIYAQYMYTKNELNTGSWHVNTAQGGVSVPLGPGSALASYAYSRDSGGHDQTRRTWALGYDYPLSKRTDVYAAYMNDRYSGMSGGDTFGAGIRAK	357	BPSL0326
BKP2_00653	GGVSVPLGPGSALASYAYS	BPSL0326	287	MKSSFSRALQTTFACAAVAALAAGASGACAQSSVQLYGQVDEWIGAQKFPGGQRAWGVQGGGMSTSYWGLRGTEDLGGGYQAIFTLEDFFRAQNGHYGRFDGDTFFGRNAYVGLATPYGTVRAGRLTTQLFISTILFNPFIDSYVFSPMVYHVFLGLGTFPTYTTDQGVVGDSGWNNAIDYTSPSFGGLNAAAMYALGNTAGDNRSKKWSGQLNYSSGPFAATAVYQYVNFNGGPGDLGALVSGMKSQGVAQLGLSYDFKLAKIYAQYMYTKNELNTGSWHVNTAQGGVSVPLGPGSALASYAYSRDSGGHDQTRRTWALGYDYPLSKRTDVYAAYMNDRYSGMSGGDTFGAGIRAK	357	BPSL0326
BKP2_00654	VSVPLGPGSALASYAYSRD	BPSL0326	289	MKSSFSRALQTTFACAAVAALAAGASGACAQSSVQLYGQVDEWIGAQKFPGGQRAWGVQGGGMSTSYWGLRGTEDLGGGYQAIFTLEDFFRAQNGHYGRFDGDTFFGRNAYVGLATPYGTVRAGRLTTQLFISTILFNPFIDSYVFSPMVYHVFLGLGTFPTYTTDQGVVGDSGWNNAIDYTSPSFGGLNAAAMYALGNTAGDNRSKKWSGQLNYSSGPFAATAVYQYVNFNGGPGDLGALVSGMKSQGVAQLGLSYDFKLAKIYAQYMYTKNELNTGSWHVNTAQGGVSVPLGPGSALASYAYSRDSGGHDQTRRTWALGYDYPLSKRTDVYAAYMNDRYSGMSGGDTFGAGIRAK	357	BPSL0326
BKP2_00655	VPLGPGSALASYAYSRDSG	BPSL0326	291	MKSSFSRALQTTFACAAVAALAAGASGACAQSSVQLYGQVDEWIGAQKFPGGQRAWGVQGGGMSTSYWGLRGTEDLGGGYQAIFTLEDFFRAQNGHYGRFDGDTFFGRNAYVGLATPYGTVRAGRLTTQLFISTILFNPFIDSYVFSPMVYHVFLGLGTFPTYTTDQGVVGDSGWNNAIDYTSPSFGGLNAAAMYALGNTAGDNRSKKWSGQLNYSSGPFAATAVYQYVNFNGGPGDLGALVSGMKSQGVAQLGLSYDFKLAKIYAQYMYTKNELNTGSWHVNTAQGGVSVPLGPGSALASYAYSRDSGGHDQTRRTWALGYDYPLSKRTDVYAAYMNDRYSGMSGGDTFGAGIRAK	357	BPSL0326
BKP2_00656	LGPGSALASYAYSRDSGGH	BPSL0326	293	MKSSFSRALQTTFACAAVAALAAGASGACAQSSVQLYGQVDEWIGAQKFPGGQRAWGVQGGGMSTSYWGLRGTEDLGGGYQAIFTLEDFFRAQNGHYGRFDGDTFFGRNAYVGLATPYGTVRAGRLTTQLFISTILFNPFIDSYVFSPMVYHVFLGLGTFPTYTTDQGVVGDSGWNNAIDYTSPSFGGLNAAAMYALGNTAGDNRSKKWSGQLNYSSGPFAATAVYQYVNFNGGPGDLGALVSGMKSQGVAQLGLSYDFKLAKIYAQYMYTKNELNTGSWHVNTAQGGVSVPLGPGSALASYAYSRDSGGHDQTRRTWALGYDYPLSKRTDVYAAYMNDRYSGMSGGDTFGAGIRAK	357	BPSL0326
BKP2_00657	PGSALASYAYSRDSGGHDQ	BPSL0326	295	MKSSFSRALQTTFACAAVAALAAGASGACAQSSVQLYGQVDEWIGAQKFPGGQRAWGVQGGGMSTSYWGLRGTEDLGGGYQAIFTLEDFFRAQNGHYGRFDGDTFFGRNAYVGLATPYGTVRAGRLTTQLFISTILFNPFIDSYVFSPMVYHVFLGLGTFPTYTTDQGVVGDSGWNNAIDYTSPSFGGLNAAAMYALGNTAGDNRSKKWSGQLNYSSGPFAATAVYQYVNFNGGPGDLGALVSGMKSQGVAQLGLSYDFKLAKIYAQYMYTKNELNTGSWHVNTAQGGVSVPLGPGSALASYAYSRDSGGHDQTRRTWALGYDYPLSKRTDVYAAYMNDRYSGMSGGDTFGAGIRAK	357	BPSL0326
BKP2_00658	SALASYAYSRDSGGHDQTR	BPSL0326	297	MKSSFSRALQTTFACAAVAALAAGASGACAQSSVQLYGQVDEWIGAQKFPGGQRAWGVQGGGMSTSYWGLRGTEDLGGGYQAIFTLEDFFRAQNGHYGRFDGDTFFGRNAYVGLATPYGTVRAGRLTTQLFISTILFNPFIDSYVFSPMVYHVFLGLGTFPTYTTDQGVVGDSGWNNAIDYTSPSFGGLNAAAMYALGNTAGDNRSKKWSGQLNYSSGPFAATAVYQYVNFNGGPGDLGALVSGMKSQGVAQLGLSYDFKLAKIYAQYMYTKNELNTGSWHVNTAQGGVSVPLGPGSALASYAYSRDSGGHDQTRRTWALGYDYPLSKRTDVYAAYMNDRYSGMSGGDTFGAGIRAK	357	BPSL0326
BKP2_00659	LASYAYSRDSGGHDQTRRT	BPSL0326	299	MKSSFSRALQTTFACAAVAALAAGASGACAQSSVQLYGQVDEWIGAQKFPGGQRAWGVQGGGMSTSYWGLRGTEDLGGGYQAIFTLEDFFRAQNGHYGRFDGDTFFGRNAYVGLATPYGTVRAGRLTTQLFISTILFNPFIDSYVFSPMVYHVFLGLGTFPTYTTDQGVVGDSGWNNAIDYTSPSFGGLNAAAMYALGNTAGDNRSKKWSGQLNYSSGPFAATAVYQYVNFNGGPGDLGALVSGMKSQGVAQLGLSYDFKLAKIYAQYMYTKNELNTGSWHVNTAQGGVSVPLGPGSALASYAYSRDSGGHDQTRRTWALGYDYPLSKRTDVYAAYMNDRYSGMSGGDTFGAGIRAK	357	BPSL0326
BKP2_00660	SYAYSRDSGGHDQTRRTWA	BPSL0326	301	MKSSFSRALQTTFACAAVAALAAGASGACAQSSVQLYGQVDEWIGAQKFPGGQRAWGVQGGGMSTSYWGLRGTEDLGGGYQAIFTLEDFFRAQNGHYGRFDGDTFFGRNAYVGLATPYGTVRAGRLTTQLFISTILFNPFIDSYVFSPMVYHVFLGLGTFPTYTTDQGVVGDSGWNNAIDYTSPSFGGLNAAAMYALGNTAGDNRSKKWSGQLNYSSGPFAATAVYQYVNFNGGPGDLGALVSGMKSQGVAQLGLSYDFKLAKIYAQYMYTKNELNTGSWHVNTAQGGVSVPLGPGSALASYAYSRDSGGHDQTRRTWALGYDYPLSKRTDVYAAYMNDRYSGMSGGDTFGAGIRAK	357	BPSL0326
BKP2_00661	AYSRDSGGHDQTRRTWALG	BPSL0326	303	MKSSFSRALQTTFACAAVAALAAGASGACAQSSVQLYGQVDEWIGAQKFPGGQRAWGVQGGGMSTSYWGLRGTEDLGGGYQAIFTLEDFFRAQNGHYGRFDGDTFFGRNAYVGLATPYGTVRAGRLTTQLFISTILFNPFIDSYVFSPMVYHVFLGLGTFPTYTTDQGVVGDSGWNNAIDYTSPSFGGLNAAAMYALGNTAGDNRSKKWSGQLNYSSGPFAATAVYQYVNFNGGPGDLGALVSGMKSQGVAQLGLSYDFKLAKIYAQYMYTKNELNTGSWHVNTAQGGVSVPLGPGSALASYAYSRDSGGHDQTRRTWALGYDYPLSKRTDVYAAYMNDRYSGMSGGDTFGAGIRAK	357	BPSL0326
BKP2_00662	SRDSGGHDQTRRTWALGYD	BPSL0326	305	MKSSFSRALQTTFACAAVAALAAGASGACAQSSVQLYGQVDEWIGAQKFPGGQRAWGVQGGGMSTSYWGLRGTEDLGGGYQAIFTLEDFFRAQNGHYGRFDGDTFFGRNAYVGLATPYGTVRAGRLTTQLFISTILFNPFIDSYVFSPMVYHVFLGLGTFPTYTTDQGVVGDSGWNNAIDYTSPSFGGLNAAAMYALGNTAGDNRSKKWSGQLNYSSGPFAATAVYQYVNFNGGPGDLGALVSGMKSQGVAQLGLSYDFKLAKIYAQYMYTKNELNTGSWHVNTAQGGVSVPLGPGSALASYAYSRDSGGHDQTRRTWALGYDYPLSKRTDVYAAYMNDRYSGMSGGDTFGAGIRAK	357	BPSL0326
BKP2_00663	DSGGHDQTRRTWALGYDYP	BPSL0326	307	MKSSFSRALQTTFACAAVAALAAGASGACAQSSVQLYGQVDEWIGAQKFPGGQRAWGVQGGGMSTSYWGLRGTEDLGGGYQAIFTLEDFFRAQNGHYGRFDGDTFFGRNAYVGLATPYGTVRAGRLTTQLFISTILFNPFIDSYVFSPMVYHVFLGLGTFPTYTTDQGVVGDSGWNNAIDYTSPSFGGLNAAAMYALGNTAGDNRSKKWSGQLNYSSGPFAATAVYQYVNFNGGPGDLGALVSGMKSQGVAQLGLSYDFKLAKIYAQYMYTKNELNTGSWHVNTAQGGVSVPLGPGSALASYAYSRDSGGHDQTRRTWALGYDYPLSKRTDVYAAYMNDRYSGMSGGDTFGAGIRAK	357	BPSL0326
BKP2_00664	GGHDQTRRTWALGYDYPLS	BPSL0326	309	MKSSFSRALQTTFACAAVAALAAGASGACAQSSVQLYGQVDEWIGAQKFPGGQRAWGVQGGGMSTSYWGLRGTEDLGGGYQAIFTLEDFFRAQNGHYGRFDGDTFFGRNAYVGLATPYGTVRAGRLTTQLFISTILFNPFIDSYVFSPMVYHVFLGLGTFPTYTTDQGVVGDSGWNNAIDYTSPSFGGLNAAAMYALGNTAGDNRSKKWSGQLNYSSGPFAATAVYQYVNFNGGPGDLGALVSGMKSQGVAQLGLSYDFKLAKIYAQYMYTKNELNTGSWHVNTAQGGVSVPLGPGSALASYAYSRDSGGHDQTRRTWALGYDYPLSKRTDVYAAYMNDRYSGMSGGDTFGAGIRAK	357	BPSL0326
BKP2_00665	HDQTRRTWALGYDYPLSKR	BPSL0326	311	MKSSFSRALQTTFACAAVAALAAGASGACAQSSVQLYGQVDEWIGAQKFPGGQRAWGVQGGGMSTSYWGLRGTEDLGGGYQAIFTLEDFFRAQNGHYGRFDGDTFFGRNAYVGLATPYGTVRAGRLTTQLFISTILFNPFIDSYVFSPMVYHVFLGLGTFPTYTTDQGVVGDSGWNNAIDYTSPSFGGLNAAAMYALGNTAGDNRSKKWSGQLNYSSGPFAATAVYQYVNFNGGPGDLGALVSGMKSQGVAQLGLSYDFKLAKIYAQYMYTKNELNTGSWHVNTAQGGVSVPLGPGSALASYAYSRDSGGHDQTRRTWALGYDYPLSKRTDVYAAYMNDRYSGMSGGDTFGAGIRAK	357	BPSL0326
BKP2_00666	QTRRTWALGYDYPLSKRTD	BPSL0326	313	MKSSFSRALQTTFACAAVAALAAGASGACAQSSVQLYGQVDEWIGAQKFPGGQRAWGVQGGGMSTSYWGLRGTEDLGGGYQAIFTLEDFFRAQNGHYGRFDGDTFFGRNAYVGLATPYGTVRAGRLTTQLFISTILFNPFIDSYVFSPMVYHVFLGLGTFPTYTTDQGVVGDSGWNNAIDYTSPSFGGLNAAAMYALGNTAGDNRSKKWSGQLNYSSGPFAATAVYQYVNFNGGPGDLGALVSGMKSQGVAQLGLSYDFKLAKIYAQYMYTKNELNTGSWHVNTAQGGVSVPLGPGSALASYAYSRDSGGHDQTRRTWALGYDYPLSKRTDVYAAYMNDRYSGMSGGDTFGAGIRAK	357	BPSL0326
BKP2_00667	RRTWALGYDYPLSKRTDVY	BPSL0326	315	MKSSFSRALQTTFACAAVAALAAGASGACAQSSVQLYGQVDEWIGAQKFPGGQRAWGVQGGGMSTSYWGLRGTEDLGGGYQAIFTLEDFFRAQNGHYGRFDGDTFFGRNAYVGLATPYGTVRAGRLTTQLFISTILFNPFIDSYVFSPMVYHVFLGLGTFPTYTTDQGVVGDSGWNNAIDYTSPSFGGLNAAAMYALGNTAGDNRSKKWSGQLNYSSGPFAATAVYQYVNFNGGPGDLGALVSGMKSQGVAQLGLSYDFKLAKIYAQYMYTKNELNTGSWHVNTAQGGVSVPLGPGSALASYAYSRDSGGHDQTRRTWALGYDYPLSKRTDVYAAYMNDRYSGMSGGDTFGAGIRAK	357	BPSL0326
BKP2_00668	TWALGYDYPLSKRTDVYAA	BPSL0326	317	MKSSFSRALQTTFACAAVAALAAGASGACAQSSVQLYGQVDEWIGAQKFPGGQRAWGVQGGGMSTSYWGLRGTEDLGGGYQAIFTLEDFFRAQNGHYGRFDGDTFFGRNAYVGLATPYGTVRAGRLTTQLFISTILFNPFIDSYVFSPMVYHVFLGLGTFPTYTTDQGVVGDSGWNNAIDYTSPSFGGLNAAAMYALGNTAGDNRSKKWSGQLNYSSGPFAATAVYQYVNFNGGPGDLGALVSGMKSQGVAQLGLSYDFKLAKIYAQYMYTKNELNTGSWHVNTAQGGVSVPLGPGSALASYAYSRDSGGHDQTRRTWALGYDYPLSKRTDVYAAYMNDRYSGMSGGDTFGAGIRAK	357	BPSL0326
BKP2_00669	ALGYDYPLSKRTDVYAAYM	BPSL0326	319	MKSSFSRALQTTFACAAVAALAAGASGACAQSSVQLYGQVDEWIGAQKFPGGQRAWGVQGGGMSTSYWGLRGTEDLGGGYQAIFTLEDFFRAQNGHYGRFDGDTFFGRNAYVGLATPYGTVRAGRLTTQLFISTILFNPFIDSYVFSPMVYHVFLGLGTFPTYTTDQGVVGDSGWNNAIDYTSPSFGGLNAAAMYALGNTAGDNRSKKWSGQLNYSSGPFAATAVYQYVNFNGGPGDLGALVSGMKSQGVAQLGLSYDFKLAKIYAQYMYTKNELNTGSWHVNTAQGGVSVPLGPGSALASYAYSRDSGGHDQTRRTWALGYDYPLSKRTDVYAAYMNDRYSGMSGGDTFGAGIRAK	357	BPSL0326
BKP2_00670	GYDYPLSKRTDVYAAYMND	BPSL0326	321	MKSSFSRALQTTFACAAVAALAAGASGACAQSSVQLYGQVDEWIGAQKFPGGQRAWGVQGGGMSTSYWGLRGTEDLGGGYQAIFTLEDFFRAQNGHYGRFDGDTFFGRNAYVGLATPYGTVRAGRLTTQLFISTILFNPFIDSYVFSPMVYHVFLGLGTFPTYTTDQGVVGDSGWNNAIDYTSPSFGGLNAAAMYALGNTAGDNRSKKWSGQLNYSSGPFAATAVYQYVNFNGGPGDLGALVSGMKSQGVAQLGLSYDFKLAKIYAQYMYTKNELNTGSWHVNTAQGGVSVPLGPGSALASYAYSRDSGGHDQTRRTWALGYDYPLSKRTDVYAAYMNDRYSGMSGGDTFGAGIRAK	357	BPSL0326
BKP2_00671	DYPLSKRTDVYAAYMNDRY	BPSL0326	323	MKSSFSRALQTTFACAAVAALAAGASGACAQSSVQLYGQVDEWIGAQKFPGGQRAWGVQGGGMSTSYWGLRGTEDLGGGYQAIFTLEDFFRAQNGHYGRFDGDTFFGRNAYVGLATPYGTVRAGRLTTQLFISTILFNPFIDSYVFSPMVYHVFLGLGTFPTYTTDQGVVGDSGWNNAIDYTSPSFGGLNAAAMYALGNTAGDNRSKKWSGQLNYSSGPFAATAVYQYVNFNGGPGDLGALVSGMKSQGVAQLGLSYDFKLAKIYAQYMYTKNELNTGSWHVNTAQGGVSVPLGPGSALASYAYSRDSGGHDQTRRTWALGYDYPLSKRTDVYAAYMNDRYSGMSGGDTFGAGIRAK	357	BPSL0326
BKP2_00672	PLSKRTDVYAAYMNDRYSG	BPSL0326	325	MKSSFSRALQTTFACAAVAALAAGASGACAQSSVQLYGQVDEWIGAQKFPGGQRAWGVQGGGMSTSYWGLRGTEDLGGGYQAIFTLEDFFRAQNGHYGRFDGDTFFGRNAYVGLATPYGTVRAGRLTTQLFISTILFNPFIDSYVFSPMVYHVFLGLGTFPTYTTDQGVVGDSGWNNAIDYTSPSFGGLNAAAMYALGNTAGDNRSKKWSGQLNYSSGPFAATAVYQYVNFNGGPGDLGALVSGMKSQGVAQLGLSYDFKLAKIYAQYMYTKNELNTGSWHVNTAQGGVSVPLGPGSALASYAYSRDSGGHDQTRRTWALGYDYPLSKRTDVYAAYMNDRYSGMSGGDTFGAGIRAK	357	BPSL0326
BKP2_00673	SKRTDVYAAYMNDRYSGMS	BPSL0326	327	MKSSFSRALQTTFACAAVAALAAGASGACAQSSVQLYGQVDEWIGAQKFPGGQRAWGVQGGGMSTSYWGLRGTEDLGGGYQAIFTLEDFFRAQNGHYGRFDGDTFFGRNAYVGLATPYGTVRAGRLTTQLFISTILFNPFIDSYVFSPMVYHVFLGLGTFPTYTTDQGVVGDSGWNNAIDYTSPSFGGLNAAAMYALGNTAGDNRSKKWSGQLNYSSGPFAATAVYQYVNFNGGPGDLGALVSGMKSQGVAQLGLSYDFKLAKIYAQYMYTKNELNTGSWHVNTAQGGVSVPLGPGSALASYAYSRDSGGHDQTRRTWALGYDYPLSKRTDVYAAYMNDRYSGMSGGDTFGAGIRAK	357	BPSL0326
BKP2_00674	RTDVYAAYMNDRYSGMSGG	BPSL0326	329	MKSSFSRALQTTFACAAVAALAAGASGACAQSSVQLYGQVDEWIGAQKFPGGQRAWGVQGGGMSTSYWGLRGTEDLGGGYQAIFTLEDFFRAQNGHYGRFDGDTFFGRNAYVGLATPYGTVRAGRLTTQLFISTILFNPFIDSYVFSPMVYHVFLGLGTFPTYTTDQGVVGDSGWNNAIDYTSPSFGGLNAAAMYALGNTAGDNRSKKWSGQLNYSSGPFAATAVYQYVNFNGGPGDLGALVSGMKSQGVAQLGLSYDFKLAKIYAQYMYTKNELNTGSWHVNTAQGGVSVPLGPGSALASYAYSRDSGGHDQTRRTWALGYDYPLSKRTDVYAAYMNDRYSGMSGGDTFGAGIRAK	357	BPSL0326
BKP2_00675	DVYAAYMNDRYSGMSGGDT	BPSL0326	331	MKSSFSRALQTTFACAAVAALAAGASGACAQSSVQLYGQVDEWIGAQKFPGGQRAWGVQGGGMSTSYWGLRGTEDLGGGYQAIFTLEDFFRAQNGHYGRFDGDTFFGRNAYVGLATPYGTVRAGRLTTQLFISTILFNPFIDSYVFSPMVYHVFLGLGTFPTYTTDQGVVGDSGWNNAIDYTSPSFGGLNAAAMYALGNTAGDNRSKKWSGQLNYSSGPFAATAVYQYVNFNGGPGDLGALVSGMKSQGVAQLGLSYDFKLAKIYAQYMYTKNELNTGSWHVNTAQGGVSVPLGPGSALASYAYSRDSGGHDQTRRTWALGYDYPLSKRTDVYAAYMNDRYSGMSGGDTFGAGIRAK	357	BPSL0326
BKP2_00676	YAAYMNDRYSGMSGGDTFG	BPSL0326	333	MKSSFSRALQTTFACAAVAALAAGASGACAQSSVQLYGQVDEWIGAQKFPGGQRAWGVQGGGMSTSYWGLRGTEDLGGGYQAIFTLEDFFRAQNGHYGRFDGDTFFGRNAYVGLATPYGTVRAGRLTTQLFISTILFNPFIDSYVFSPMVYHVFLGLGTFPTYTTDQGVVGDSGWNNAIDYTSPSFGGLNAAAMYALGNTAGDNRSKKWSGQLNYSSGPFAATAVYQYVNFNGGPGDLGALVSGMKSQGVAQLGLSYDFKLAKIYAQYMYTKNELNTGSWHVNTAQGGVSVPLGPGSALASYAYSRDSGGHDQTRRTWALGYDYPLSKRTDVYAAYMNDRYSGMSGGDTFGAGIRAK	357	BPSL0326
BKP2_00677	AYMNDRYSGMSGGDTFGAG	BPSL0326	335	MKSSFSRALQTTFACAAVAALAAGASGACAQSSVQLYGQVDEWIGAQKFPGGQRAWGVQGGGMSTSYWGLRGTEDLGGGYQAIFTLEDFFRAQNGHYGRFDGDTFFGRNAYVGLATPYGTVRAGRLTTQLFISTILFNPFIDSYVFSPMVYHVFLGLGTFPTYTTDQGVVGDSGWNNAIDYTSPSFGGLNAAAMYALGNTAGDNRSKKWSGQLNYSSGPFAATAVYQYVNFNGGPGDLGALVSGMKSQGVAQLGLSYDFKLAKIYAQYMYTKNELNTGSWHVNTAQGGVSVPLGPGSALASYAYSRDSGGHDQTRRTWALGYDYPLSKRTDVYAAYMNDRYSGMSGGDTFGAGIRAK	357	BPSL0326
BKP2_00678	MNDRYSGMSGGDTFGAGIR	BPSL0326	337	MKSSFSRALQTTFACAAVAALAAGASGACAQSSVQLYGQVDEWIGAQKFPGGQRAWGVQGGGMSTSYWGLRGTEDLGGGYQAIFTLEDFFRAQNGHYGRFDGDTFFGRNAYVGLATPYGTVRAGRLTTQLFISTILFNPFIDSYVFSPMVYHVFLGLGTFPTYTTDQGVVGDSGWNNAIDYTSPSFGGLNAAAMYALGNTAGDNRSKKWSGQLNYSSGPFAATAVYQYVNFNGGPGDLGALVSGMKSQGVAQLGLSYDFKLAKIYAQYMYTKNELNTGSWHVNTAQGGVSVPLGPGSALASYAYSRDSGGHDQTRRTWALGYDYPLSKRTDVYAAYMNDRYSGMSGGDTFGAGIRAK	357	BPSL0326
BKP2_00679	DRYSGMSGGDTFGAGIRAK	BPSL0326	339	MKSSFSRALQTTFACAAVAALAAGASGACAQSSVQLYGQVDEWIGAQKFPGGQRAWGVQGGGMSTSYWGLRGTEDLGGGYQAIFTLEDFFRAQNGHYGRFDGDTFFGRNAYVGLATPYGTVRAGRLTTQLFISTILFNPFIDSYVFSPMVYHVFLGLGTFPTYTTDQGVVGDSGWNNAIDYTSPSFGGLNAAAMYALGNTAGDNRSKKWSGQLNYSSGPFAATAVYQYVNFNGGPGDLGALVSGMKSQGVAQLGLSYDFKLAKIYAQYMYTKNELNTGSWHVNTAQGGVSVPLGPGSALASYAYSRDSGGHDQTRRTWALGYDYPLSKRTDVYAAYMNDRYSGMSGGDTFGAGIRAK	357	BPSL0326
BKP2_00680	MHKRNLVLKAAAALVVGSL	BPSL1445	1	MHKRNLVLKAAAALVVGSLALAGCTTTPDKPANAATNASKRQAIDASVDATLSRLYSTVRGSRELVAKSRGVLVFPDVIQAGLIIGGQTGNGALRVGGATVGYYNTSSLSVGLQAGAQSKAIVFLFMTQDALDKFRNSDGWAAGADASVALVKMGANGAIDTTTATAPVEVIVLTNAGLMGDVSISGTKVTKLKI	195	BPSL1445
BKP2_00681	KRNLVLKAAAALVVGSLAL	BPSL1445	3	MHKRNLVLKAAAALVVGSLALAGCTTTPDKPANAATNASKRQAIDASVDATLSRLYSTVRGSRELVAKSRGVLVFPDVIQAGLIIGGQTGNGALRVGGATVGYYNTSSLSVGLQAGAQSKAIVFLFMTQDALDKFRNSDGWAAGADASVALVKMGANGAIDTTTATAPVEVIVLTNAGLMGDVSISGTKVTKLKI	195	BPSL1445
BKP2_00682	NLVLKAAAALVVGSLALAG	BPSL1445	5	MHKRNLVLKAAAALVVGSLALAGCTTTPDKPANAATNASKRQAIDASVDATLSRLYSTVRGSRELVAKSRGVLVFPDVIQAGLIIGGQTGNGALRVGGATVGYYNTSSLSVGLQAGAQSKAIVFLFMTQDALDKFRNSDGWAAGADASVALVKMGANGAIDTTTATAPVEVIVLTNAGLMGDVSISGTKVTKLKI	195	BPSL1445
BKP2_00683	VLKAAAALVVGSLALAGCT	BPSL1445	7	MHKRNLVLKAAAALVVGSLALAGCTTTPDKPANAATNASKRQAIDASVDATLSRLYSTVRGSRELVAKSRGVLVFPDVIQAGLIIGGQTGNGALRVGGATVGYYNTSSLSVGLQAGAQSKAIVFLFMTQDALDKFRNSDGWAAGADASVALVKMGANGAIDTTTATAPVEVIVLTNAGLMGDVSISGTKVTKLKI	195	BPSL1445
BKP2_00684	KAAAALVVGSLALAGCTTT	BPSL1445	9	MHKRNLVLKAAAALVVGSLALAGCTTTPDKPANAATNASKRQAIDASVDATLSRLYSTVRGSRELVAKSRGVLVFPDVIQAGLIIGGQTGNGALRVGGATVGYYNTSSLSVGLQAGAQSKAIVFLFMTQDALDKFRNSDGWAAGADASVALVKMGANGAIDTTTATAPVEVIVLTNAGLMGDVSISGTKVTKLKI	195	BPSL1445
BKP2_00685	AAALVVGSLALAGCTTTPD	BPSL1445	11	MHKRNLVLKAAAALVVGSLALAGCTTTPDKPANAATNASKRQAIDASVDATLSRLYSTVRGSRELVAKSRGVLVFPDVIQAGLIIGGQTGNGALRVGGATVGYYNTSSLSVGLQAGAQSKAIVFLFMTQDALDKFRNSDGWAAGADASVALVKMGANGAIDTTTATAPVEVIVLTNAGLMGDVSISGTKVTKLKI	195	BPSL1445
BKP2_00686	ALVVGSLALAGCTTTPDKP	BPSL1445	13	MHKRNLVLKAAAALVVGSLALAGCTTTPDKPANAATNASKRQAIDASVDATLSRLYSTVRGSRELVAKSRGVLVFPDVIQAGLIIGGQTGNGALRVGGATVGYYNTSSLSVGLQAGAQSKAIVFLFMTQDALDKFRNSDGWAAGADASVALVKMGANGAIDTTTATAPVEVIVLTNAGLMGDVSISGTKVTKLKI	195	BPSL1445
BKP2_00687	VVGSLALAGCTTTPDKPAN	BPSL1445	15	MHKRNLVLKAAAALVVGSLALAGCTTTPDKPANAATNASKRQAIDASVDATLSRLYSTVRGSRELVAKSRGVLVFPDVIQAGLIIGGQTGNGALRVGGATVGYYNTSSLSVGLQAGAQSKAIVFLFMTQDALDKFRNSDGWAAGADASVALVKMGANGAIDTTTATAPVEVIVLTNAGLMGDVSISGTKVTKLKI	195	BPSL1445
BKP2_00688	GSLALAGCTTTPDKPANAA	BPSL1445	17	MHKRNLVLKAAAALVVGSLALAGCTTTPDKPANAATNASKRQAIDASVDATLSRLYSTVRGSRELVAKSRGVLVFPDVIQAGLIIGGQTGNGALRVGGATVGYYNTSSLSVGLQAGAQSKAIVFLFMTQDALDKFRNSDGWAAGADASVALVKMGANGAIDTTTATAPVEVIVLTNAGLMGDVSISGTKVTKLKI	195	BPSL1445
BKP2_00689	LALAGCTTTPDKPANAATN	BPSL1445	19	MHKRNLVLKAAAALVVGSLALAGCTTTPDKPANAATNASKRQAIDASVDATLSRLYSTVRGSRELVAKSRGVLVFPDVIQAGLIIGGQTGNGALRVGGATVGYYNTSSLSVGLQAGAQSKAIVFLFMTQDALDKFRNSDGWAAGADASVALVKMGANGAIDTTTATAPVEVIVLTNAGLMGDVSISGTKVTKLKI	195	BPSL1445
BKP2_00690	LAGCTTTPDKPANAATNAS	BPSL1445	21	MHKRNLVLKAAAALVVGSLALAGCTTTPDKPANAATNASKRQAIDASVDATLSRLYSTVRGSRELVAKSRGVLVFPDVIQAGLIIGGQTGNGALRVGGATVGYYNTSSLSVGLQAGAQSKAIVFLFMTQDALDKFRNSDGWAAGADASVALVKMGANGAIDTTTATAPVEVIVLTNAGLMGDVSISGTKVTKLKI	195	BPSL1445
BKP2_00691	GCTTTPDKPANAATNASKR	BPSL1445	23	MHKRNLVLKAAAALVVGSLALAGCTTTPDKPANAATNASKRQAIDASVDATLSRLYSTVRGSRELVAKSRGVLVFPDVIQAGLIIGGQTGNGALRVGGATVGYYNTSSLSVGLQAGAQSKAIVFLFMTQDALDKFRNSDGWAAGADASVALVKMGANGAIDTTTATAPVEVIVLTNAGLMGDVSISGTKVTKLKI	195	BPSL1445
BKP2_00692	TTTPDKPANAATNASKRQA	BPSL1445	25	MHKRNLVLKAAAALVVGSLALAGCTTTPDKPANAATNASKRQAIDASVDATLSRLYSTVRGSRELVAKSRGVLVFPDVIQAGLIIGGQTGNGALRVGGATVGYYNTSSLSVGLQAGAQSKAIVFLFMTQDALDKFRNSDGWAAGADASVALVKMGANGAIDTTTATAPVEVIVLTNAGLMGDVSISGTKVTKLKI	195	BPSL1445
BKP2_00693	TPDKPANAATNASKRQAID	BPSL1445	27	MHKRNLVLKAAAALVVGSLALAGCTTTPDKPANAATNASKRQAIDASVDATLSRLYSTVRGSRELVAKSRGVLVFPDVIQAGLIIGGQTGNGALRVGGATVGYYNTSSLSVGLQAGAQSKAIVFLFMTQDALDKFRNSDGWAAGADASVALVKMGANGAIDTTTATAPVEVIVLTNAGLMGDVSISGTKVTKLKI	195	BPSL1445
BKP2_00694	DKPANAATNASKRQAIDAS	BPSL1445	29	MHKRNLVLKAAAALVVGSLALAGCTTTPDKPANAATNASKRQAIDASVDATLSRLYSTVRGSRELVAKSRGVLVFPDVIQAGLIIGGQTGNGALRVGGATVGYYNTSSLSVGLQAGAQSKAIVFLFMTQDALDKFRNSDGWAAGADASVALVKMGANGAIDTTTATAPVEVIVLTNAGLMGDVSISGTKVTKLKI	195	BPSL1445
BKP2_00695	PANAATNASKRQAIDASVD	BPSL1445	31	MHKRNLVLKAAAALVVGSLALAGCTTTPDKPANAATNASKRQAIDASVDATLSRLYSTVRGSRELVAKSRGVLVFPDVIQAGLIIGGQTGNGALRVGGATVGYYNTSSLSVGLQAGAQSKAIVFLFMTQDALDKFRNSDGWAAGADASVALVKMGANGAIDTTTATAPVEVIVLTNAGLMGDVSISGTKVTKLKI	195	BPSL1445
BKP2_00696	NAATNASKRQAIDASVDAT	BPSL1445	33	MHKRNLVLKAAAALVVGSLALAGCTTTPDKPANAATNASKRQAIDASVDATLSRLYSTVRGSRELVAKSRGVLVFPDVIQAGLIIGGQTGNGALRVGGATVGYYNTSSLSVGLQAGAQSKAIVFLFMTQDALDKFRNSDGWAAGADASVALVKMGANGAIDTTTATAPVEVIVLTNAGLMGDVSISGTKVTKLKI	195	BPSL1445
BKP2_00697	ATNASKRQAIDASVDATLS	BPSL1445	35	MHKRNLVLKAAAALVVGSLALAGCTTTPDKPANAATNASKRQAIDASVDATLSRLYSTVRGSRELVAKSRGVLVFPDVIQAGLIIGGQTGNGALRVGGATVGYYNTSSLSVGLQAGAQSKAIVFLFMTQDALDKFRNSDGWAAGADASVALVKMGANGAIDTTTATAPVEVIVLTNAGLMGDVSISGTKVTKLKI	195	BPSL1445
BKP2_00698	NASKRQAIDASVDATLSRL	BPSL1445	37	MHKRNLVLKAAAALVVGSLALAGCTTTPDKPANAATNASKRQAIDASVDATLSRLYSTVRGSRELVAKSRGVLVFPDVIQAGLIIGGQTGNGALRVGGATVGYYNTSSLSVGLQAGAQSKAIVFLFMTQDALDKFRNSDGWAAGADASVALVKMGANGAIDTTTATAPVEVIVLTNAGLMGDVSISGTKVTKLKI	195	BPSL1445
BKP2_00699	SKRQAIDASVDATLSRLYS	BPSL1445	39	MHKRNLVLKAAAALVVGSLALAGCTTTPDKPANAATNASKRQAIDASVDATLSRLYSTVRGSRELVAKSRGVLVFPDVIQAGLIIGGQTGNGALRVGGATVGYYNTSSLSVGLQAGAQSKAIVFLFMTQDALDKFRNSDGWAAGADASVALVKMGANGAIDTTTATAPVEVIVLTNAGLMGDVSISGTKVTKLKI	195	BPSL1445
BKP2_00700	RQAIDASVDATLSRLYSTV	BPSL1445	41	MHKRNLVLKAAAALVVGSLALAGCTTTPDKPANAATNASKRQAIDASVDATLSRLYSTVRGSRELVAKSRGVLVFPDVIQAGLIIGGQTGNGALRVGGATVGYYNTSSLSVGLQAGAQSKAIVFLFMTQDALDKFRNSDGWAAGADASVALVKMGANGAIDTTTATAPVEVIVLTNAGLMGDVSISGTKVTKLKI	195	BPSL1445
BKP2_00701	AIDASVDATLSRLYSTVRG	BPSL1445	43	MHKRNLVLKAAAALVVGSLALAGCTTTPDKPANAATNASKRQAIDASVDATLSRLYSTVRGSRELVAKSRGVLVFPDVIQAGLIIGGQTGNGALRVGGATVGYYNTSSLSVGLQAGAQSKAIVFLFMTQDALDKFRNSDGWAAGADASVALVKMGANGAIDTTTATAPVEVIVLTNAGLMGDVSISGTKVTKLKI	195	BPSL1445
BKP2_00702	DASVDATLSRLYSTVRGSR	BPSL1445	45	MHKRNLVLKAAAALVVGSLALAGCTTTPDKPANAATNASKRQAIDASVDATLSRLYSTVRGSRELVAKSRGVLVFPDVIQAGLIIGGQTGNGALRVGGATVGYYNTSSLSVGLQAGAQSKAIVFLFMTQDALDKFRNSDGWAAGADASVALVKMGANGAIDTTTATAPVEVIVLTNAGLMGDVSISGTKVTKLKI	195	BPSL1445
BKP2_00703	SVDATLSRLYSTVRGSREL	BPSL1445	47	MHKRNLVLKAAAALVVGSLALAGCTTTPDKPANAATNASKRQAIDASVDATLSRLYSTVRGSRELVAKSRGVLVFPDVIQAGLIIGGQTGNGALRVGGATVGYYNTSSLSVGLQAGAQSKAIVFLFMTQDALDKFRNSDGWAAGADASVALVKMGANGAIDTTTATAPVEVIVLTNAGLMGDVSISGTKVTKLKI	195	BPSL1445
BKP2_00704	DATLSRLYSTVRGSRELVA	BPSL1445	49	MHKRNLVLKAAAALVVGSLALAGCTTTPDKPANAATNASKRQAIDASVDATLSRLYSTVRGSRELVAKSRGVLVFPDVIQAGLIIGGQTGNGALRVGGATVGYYNTSSLSVGLQAGAQSKAIVFLFMTQDALDKFRNSDGWAAGADASVALVKMGANGAIDTTTATAPVEVIVLTNAGLMGDVSISGTKVTKLKI	195	BPSL1445
BKP2_00705	TLSRLYSTVRGSRELVAKS	BPSL1445	51	MHKRNLVLKAAAALVVGSLALAGCTTTPDKPANAATNASKRQAIDASVDATLSRLYSTVRGSRELVAKSRGVLVFPDVIQAGLIIGGQTGNGALRVGGATVGYYNTSSLSVGLQAGAQSKAIVFLFMTQDALDKFRNSDGWAAGADASVALVKMGANGAIDTTTATAPVEVIVLTNAGLMGDVSISGTKVTKLKI	195	BPSL1445
BKP2_00706	SRLYSTVRGSRELVAKSRG	BPSL1445	53	MHKRNLVLKAAAALVVGSLALAGCTTTPDKPANAATNASKRQAIDASVDATLSRLYSTVRGSRELVAKSRGVLVFPDVIQAGLIIGGQTGNGALRVGGATVGYYNTSSLSVGLQAGAQSKAIVFLFMTQDALDKFRNSDGWAAGADASVALVKMGANGAIDTTTATAPVEVIVLTNAGLMGDVSISGTKVTKLKI	195	BPSL1445
BKP2_00707	LYSTVRGSRELVAKSRGVL	BPSL1445	55	MHKRNLVLKAAAALVVGSLALAGCTTTPDKPANAATNASKRQAIDASVDATLSRLYSTVRGSRELVAKSRGVLVFPDVIQAGLIIGGQTGNGALRVGGATVGYYNTSSLSVGLQAGAQSKAIVFLFMTQDALDKFRNSDGWAAGADASVALVKMGANGAIDTTTATAPVEVIVLTNAGLMGDVSISGTKVTKLKI	195	BPSL1445
BKP2_00708	STVRGSRELVAKSRGVLVF	BPSL1445	57	MHKRNLVLKAAAALVVGSLALAGCTTTPDKPANAATNASKRQAIDASVDATLSRLYSTVRGSRELVAKSRGVLVFPDVIQAGLIIGGQTGNGALRVGGATVGYYNTSSLSVGLQAGAQSKAIVFLFMTQDALDKFRNSDGWAAGADASVALVKMGANGAIDTTTATAPVEVIVLTNAGLMGDVSISGTKVTKLKI	195	BPSL1445
BKP2_00709	VRGSRELVAKSRGVLVFPD	BPSL1445	59	MHKRNLVLKAAAALVVGSLALAGCTTTPDKPANAATNASKRQAIDASVDATLSRLYSTVRGSRELVAKSRGVLVFPDVIQAGLIIGGQTGNGALRVGGATVGYYNTSSLSVGLQAGAQSKAIVFLFMTQDALDKFRNSDGWAAGADASVALVKMGANGAIDTTTATAPVEVIVLTNAGLMGDVSISGTKVTKLKI	195	BPSL1445
BKP2_00710	GSRELVAKSRGVLVFPDVI	BPSL1445	61	MHKRNLVLKAAAALVVGSLALAGCTTTPDKPANAATNASKRQAIDASVDATLSRLYSTVRGSRELVAKSRGVLVFPDVIQAGLIIGGQTGNGALRVGGATVGYYNTSSLSVGLQAGAQSKAIVFLFMTQDALDKFRNSDGWAAGADASVALVKMGANGAIDTTTATAPVEVIVLTNAGLMGDVSISGTKVTKLKI	195	BPSL1445
BKP2_00711	RELVAKSRGVLVFPDVIQA	BPSL1445	63	MHKRNLVLKAAAALVVGSLALAGCTTTPDKPANAATNASKRQAIDASVDATLSRLYSTVRGSRELVAKSRGVLVFPDVIQAGLIIGGQTGNGALRVGGATVGYYNTSSLSVGLQAGAQSKAIVFLFMTQDALDKFRNSDGWAAGADASVALVKMGANGAIDTTTATAPVEVIVLTNAGLMGDVSISGTKVTKLKI	195	BPSL1445
BKP2_00712	LVAKSRGVLVFPDVIQAGL	BPSL1445	65	MHKRNLVLKAAAALVVGSLALAGCTTTPDKPANAATNASKRQAIDASVDATLSRLYSTVRGSRELVAKSRGVLVFPDVIQAGLIIGGQTGNGALRVGGATVGYYNTSSLSVGLQAGAQSKAIVFLFMTQDALDKFRNSDGWAAGADASVALVKMGANGAIDTTTATAPVEVIVLTNAGLMGDVSISGTKVTKLKI	195	BPSL1445
BKP2_00713	AKSRGVLVFPDVIQAGLII	BPSL1445	67	MHKRNLVLKAAAALVVGSLALAGCTTTPDKPANAATNASKRQAIDASVDATLSRLYSTVRGSRELVAKSRGVLVFPDVIQAGLIIGGQTGNGALRVGGATVGYYNTSSLSVGLQAGAQSKAIVFLFMTQDALDKFRNSDGWAAGADASVALVKMGANGAIDTTTATAPVEVIVLTNAGLMGDVSISGTKVTKLKI	195	BPSL1445
BKP2_00714	SRGVLVFPDVIQAGLIIGG	BPSL1445	69	MHKRNLVLKAAAALVVGSLALAGCTTTPDKPANAATNASKRQAIDASVDATLSRLYSTVRGSRELVAKSRGVLVFPDVIQAGLIIGGQTGNGALRVGGATVGYYNTSSLSVGLQAGAQSKAIVFLFMTQDALDKFRNSDGWAAGADASVALVKMGANGAIDTTTATAPVEVIVLTNAGLMGDVSISGTKVTKLKI	195	BPSL1445
BKP2_00715	GVLVFPDVIQAGLIIGGQT	BPSL1445	71	MHKRNLVLKAAAALVVGSLALAGCTTTPDKPANAATNASKRQAIDASVDATLSRLYSTVRGSRELVAKSRGVLVFPDVIQAGLIIGGQTGNGALRVGGATVGYYNTSSLSVGLQAGAQSKAIVFLFMTQDALDKFRNSDGWAAGADASVALVKMGANGAIDTTTATAPVEVIVLTNAGLMGDVSISGTKVTKLKI	195	BPSL1445
BKP2_00716	LVFPDVIQAGLIIGGQTGN	BPSL1445	73	MHKRNLVLKAAAALVVGSLALAGCTTTPDKPANAATNASKRQAIDASVDATLSRLYSTVRGSRELVAKSRGVLVFPDVIQAGLIIGGQTGNGALRVGGATVGYYNTSSLSVGLQAGAQSKAIVFLFMTQDALDKFRNSDGWAAGADASVALVKMGANGAIDTTTATAPVEVIVLTNAGLMGDVSISGTKVTKLKI	195	BPSL1445
BKP2_00717	FPDVIQAGLIIGGQTGNGA	BPSL1445	75	MHKRNLVLKAAAALVVGSLALAGCTTTPDKPANAATNASKRQAIDASVDATLSRLYSTVRGSRELVAKSRGVLVFPDVIQAGLIIGGQTGNGALRVGGATVGYYNTSSLSVGLQAGAQSKAIVFLFMTQDALDKFRNSDGWAAGADASVALVKMGANGAIDTTTATAPVEVIVLTNAGLMGDVSISGTKVTKLKI	195	BPSL1445
BKP2_00718	DVIQAGLIIGGQTGNGALR	BPSL1445	77	MHKRNLVLKAAAALVVGSLALAGCTTTPDKPANAATNASKRQAIDASVDATLSRLYSTVRGSRELVAKSRGVLVFPDVIQAGLIIGGQTGNGALRVGGATVGYYNTSSLSVGLQAGAQSKAIVFLFMTQDALDKFRNSDGWAAGADASVALVKMGANGAIDTTTATAPVEVIVLTNAGLMGDVSISGTKVTKLKI	195	BPSL1445
BKP2_00719	IQAGLIIGGQTGNGALRVG	BPSL1445	79	MHKRNLVLKAAAALVVGSLALAGCTTTPDKPANAATNASKRQAIDASVDATLSRLYSTVRGSRELVAKSRGVLVFPDVIQAGLIIGGQTGNGALRVGGATVGYYNTSSLSVGLQAGAQSKAIVFLFMTQDALDKFRNSDGWAAGADASVALVKMGANGAIDTTTATAPVEVIVLTNAGLMGDVSISGTKVTKLKI	195	BPSL1445
BKP2_00720	AGLIIGGQTGNGALRVGGA	BPSL1445	81	MHKRNLVLKAAAALVVGSLALAGCTTTPDKPANAATNASKRQAIDASVDATLSRLYSTVRGSRELVAKSRGVLVFPDVIQAGLIIGGQTGNGALRVGGATVGYYNTSSLSVGLQAGAQSKAIVFLFMTQDALDKFRNSDGWAAGADASVALVKMGANGAIDTTTATAPVEVIVLTNAGLMGDVSISGTKVTKLKI	195	BPSL1445
BKP2_00721	LIIGGQTGNGALRVGGATV	BPSL1445	83	MHKRNLVLKAAAALVVGSLALAGCTTTPDKPANAATNASKRQAIDASVDATLSRLYSTVRGSRELVAKSRGVLVFPDVIQAGLIIGGQTGNGALRVGGATVGYYNTSSLSVGLQAGAQSKAIVFLFMTQDALDKFRNSDGWAAGADASVALVKMGANGAIDTTTATAPVEVIVLTNAGLMGDVSISGTKVTKLKI	195	BPSL1445
BKP2_00722	IGGQTGNGALRVGGATVGY	BPSL1445	85	MHKRNLVLKAAAALVVGSLALAGCTTTPDKPANAATNASKRQAIDASVDATLSRLYSTVRGSRELVAKSRGVLVFPDVIQAGLIIGGQTGNGALRVGGATVGYYNTSSLSVGLQAGAQSKAIVFLFMTQDALDKFRNSDGWAAGADASVALVKMGANGAIDTTTATAPVEVIVLTNAGLMGDVSISGTKVTKLKI	195	BPSL1445
BKP2_00723	GQTGNGALRVGGATVGYYN	BPSL1445	87	MHKRNLVLKAAAALVVGSLALAGCTTTPDKPANAATNASKRQAIDASVDATLSRLYSTVRGSRELVAKSRGVLVFPDVIQAGLIIGGQTGNGALRVGGATVGYYNTSSLSVGLQAGAQSKAIVFLFMTQDALDKFRNSDGWAAGADASVALVKMGANGAIDTTTATAPVEVIVLTNAGLMGDVSISGTKVTKLKI	195	BPSL1445
BKP2_00724	TGNGALRVGGATVGYYNTS	BPSL1445	89	MHKRNLVLKAAAALVVGSLALAGCTTTPDKPANAATNASKRQAIDASVDATLSRLYSTVRGSRELVAKSRGVLVFPDVIQAGLIIGGQTGNGALRVGGATVGYYNTSSLSVGLQAGAQSKAIVFLFMTQDALDKFRNSDGWAAGADASVALVKMGANGAIDTTTATAPVEVIVLTNAGLMGDVSISGTKVTKLKI	195	BPSL1445
BKP2_00725	NGALRVGGATVGYYNTSSL	BPSL1445	91	MHKRNLVLKAAAALVVGSLALAGCTTTPDKPANAATNASKRQAIDASVDATLSRLYSTVRGSRELVAKSRGVLVFPDVIQAGLIIGGQTGNGALRVGGATVGYYNTSSLSVGLQAGAQSKAIVFLFMTQDALDKFRNSDGWAAGADASVALVKMGANGAIDTTTATAPVEVIVLTNAGLMGDVSISGTKVTKLKI	195	BPSL1445
BKP2_00726	ALRVGGATVGYYNTSSLSV	BPSL1445	93	MHKRNLVLKAAAALVVGSLALAGCTTTPDKPANAATNASKRQAIDASVDATLSRLYSTVRGSRELVAKSRGVLVFPDVIQAGLIIGGQTGNGALRVGGATVGYYNTSSLSVGLQAGAQSKAIVFLFMTQDALDKFRNSDGWAAGADASVALVKMGANGAIDTTTATAPVEVIVLTNAGLMGDVSISGTKVTKLKI	195	BPSL1445
BKP2_00727	RVGGATVGYYNTSSLSVGL	BPSL1445	95	MHKRNLVLKAAAALVVGSLALAGCTTTPDKPANAATNASKRQAIDASVDATLSRLYSTVRGSRELVAKSRGVLVFPDVIQAGLIIGGQTGNGALRVGGATVGYYNTSSLSVGLQAGAQSKAIVFLFMTQDALDKFRNSDGWAAGADASVALVKMGANGAIDTTTATAPVEVIVLTNAGLMGDVSISGTKVTKLKI	195	BPSL1445
BKP2_00728	GGATVGYYNTSSLSVGLQA	BPSL1445	97	MHKRNLVLKAAAALVVGSLALAGCTTTPDKPANAATNASKRQAIDASVDATLSRLYSTVRGSRELVAKSRGVLVFPDVIQAGLIIGGQTGNGALRVGGATVGYYNTSSLSVGLQAGAQSKAIVFLFMTQDALDKFRNSDGWAAGADASVALVKMGANGAIDTTTATAPVEVIVLTNAGLMGDVSISGTKVTKLKI	195	BPSL1445
BKP2_00729	ATVGYYNTSSLSVGLQAGA	BPSL1445	99	MHKRNLVLKAAAALVVGSLALAGCTTTPDKPANAATNASKRQAIDASVDATLSRLYSTVRGSRELVAKSRGVLVFPDVIQAGLIIGGQTGNGALRVGGATVGYYNTSSLSVGLQAGAQSKAIVFLFMTQDALDKFRNSDGWAAGADASVALVKMGANGAIDTTTATAPVEVIVLTNAGLMGDVSISGTKVTKLKI	195	BPSL1445
BKP2_00730	VGYYNTSSLSVGLQAGAQS	BPSL1445	101	MHKRNLVLKAAAALVVGSLALAGCTTTPDKPANAATNASKRQAIDASVDATLSRLYSTVRGSRELVAKSRGVLVFPDVIQAGLIIGGQTGNGALRVGGATVGYYNTSSLSVGLQAGAQSKAIVFLFMTQDALDKFRNSDGWAAGADASVALVKMGANGAIDTTTATAPVEVIVLTNAGLMGDVSISGTKVTKLKI	195	BPSL1445
BKP2_00731	YYNTSSLSVGLQAGAQSKA	BPSL1445	103	MHKRNLVLKAAAALVVGSLALAGCTTTPDKPANAATNASKRQAIDASVDATLSRLYSTVRGSRELVAKSRGVLVFPDVIQAGLIIGGQTGNGALRVGGATVGYYNTSSLSVGLQAGAQSKAIVFLFMTQDALDKFRNSDGWAAGADASVALVKMGANGAIDTTTATAPVEVIVLTNAGLMGDVSISGTKVTKLKI	195	BPSL1445
BKP2_00732	NTSSLSVGLQAGAQSKAIV	BPSL1445	105	MHKRNLVLKAAAALVVGSLALAGCTTTPDKPANAATNASKRQAIDASVDATLSRLYSTVRGSRELVAKSRGVLVFPDVIQAGLIIGGQTGNGALRVGGATVGYYNTSSLSVGLQAGAQSKAIVFLFMTQDALDKFRNSDGWAAGADASVALVKMGANGAIDTTTATAPVEVIVLTNAGLMGDVSISGTKVTKLKI	195	BPSL1445
BKP2_00733	SSLSVGLQAGAQSKAIVFL	BPSL1445	107	MHKRNLVLKAAAALVVGSLALAGCTTTPDKPANAATNASKRQAIDASVDATLSRLYSTVRGSRELVAKSRGVLVFPDVIQAGLIIGGQTGNGALRVGGATVGYYNTSSLSVGLQAGAQSKAIVFLFMTQDALDKFRNSDGWAAGADASVALVKMGANGAIDTTTATAPVEVIVLTNAGLMGDVSISGTKVTKLKI	195	BPSL1445
BKP2_00734	LSVGLQAGAQSKAIVFLFM	BPSL1445	109	MHKRNLVLKAAAALVVGSLALAGCTTTPDKPANAATNASKRQAIDASVDATLSRLYSTVRGSRELVAKSRGVLVFPDVIQAGLIIGGQTGNGALRVGGATVGYYNTSSLSVGLQAGAQSKAIVFLFMTQDALDKFRNSDGWAAGADASVALVKMGANGAIDTTTATAPVEVIVLTNAGLMGDVSISGTKVTKLKI	195	BPSL1445
BKP2_00735	VGLQAGAQSKAIVFLFMTQ	BPSL1445	111	MHKRNLVLKAAAALVVGSLALAGCTTTPDKPANAATNASKRQAIDASVDATLSRLYSTVRGSRELVAKSRGVLVFPDVIQAGLIIGGQTGNGALRVGGATVGYYNTSSLSVGLQAGAQSKAIVFLFMTQDALDKFRNSDGWAAGADASVALVKMGANGAIDTTTATAPVEVIVLTNAGLMGDVSISGTKVTKLKI	195	BPSL1445
BKP2_00736	LQAGAQSKAIVFLFMTQDA	BPSL1445	113	MHKRNLVLKAAAALVVGSLALAGCTTTPDKPANAATNASKRQAIDASVDATLSRLYSTVRGSRELVAKSRGVLVFPDVIQAGLIIGGQTGNGALRVGGATVGYYNTSSLSVGLQAGAQSKAIVFLFMTQDALDKFRNSDGWAAGADASVALVKMGANGAIDTTTATAPVEVIVLTNAGLMGDVSISGTKVTKLKI	195	BPSL1445
BKP2_00737	AGAQSKAIVFLFMTQDALD	BPSL1445	115	MHKRNLVLKAAAALVVGSLALAGCTTTPDKPANAATNASKRQAIDASVDATLSRLYSTVRGSRELVAKSRGVLVFPDVIQAGLIIGGQTGNGALRVGGATVGYYNTSSLSVGLQAGAQSKAIVFLFMTQDALDKFRNSDGWAAGADASVALVKMGANGAIDTTTATAPVEVIVLTNAGLMGDVSISGTKVTKLKI	195	BPSL1445
BKP2_00738	AQSKAIVFLFMTQDALDKF	BPSL1445	117	MHKRNLVLKAAAALVVGSLALAGCTTTPDKPANAATNASKRQAIDASVDATLSRLYSTVRGSRELVAKSRGVLVFPDVIQAGLIIGGQTGNGALRVGGATVGYYNTSSLSVGLQAGAQSKAIVFLFMTQDALDKFRNSDGWAAGADASVALVKMGANGAIDTTTATAPVEVIVLTNAGLMGDVSISGTKVTKLKI	195	BPSL1445
BKP2_00739	SKAIVFLFMTQDALDKFRN	BPSL1445	119	MHKRNLVLKAAAALVVGSLALAGCTTTPDKPANAATNASKRQAIDASVDATLSRLYSTVRGSRELVAKSRGVLVFPDVIQAGLIIGGQTGNGALRVGGATVGYYNTSSLSVGLQAGAQSKAIVFLFMTQDALDKFRNSDGWAAGADASVALVKMGANGAIDTTTATAPVEVIVLTNAGLMGDVSISGTKVTKLKI	195	BPSL1445
BKP2_00740	AIVFLFMTQDALDKFRNSD	BPSL1445	121	MHKRNLVLKAAAALVVGSLALAGCTTTPDKPANAATNASKRQAIDASVDATLSRLYSTVRGSRELVAKSRGVLVFPDVIQAGLIIGGQTGNGALRVGGATVGYYNTSSLSVGLQAGAQSKAIVFLFMTQDALDKFRNSDGWAAGADASVALVKMGANGAIDTTTATAPVEVIVLTNAGLMGDVSISGTKVTKLKI	195	BPSL1445
BKP2_00741	VFLFMTQDALDKFRNSDGW	BPSL1445	123	MHKRNLVLKAAAALVVGSLALAGCTTTPDKPANAATNASKRQAIDASVDATLSRLYSTVRGSRELVAKSRGVLVFPDVIQAGLIIGGQTGNGALRVGGATVGYYNTSSLSVGLQAGAQSKAIVFLFMTQDALDKFRNSDGWAAGADASVALVKMGANGAIDTTTATAPVEVIVLTNAGLMGDVSISGTKVTKLKI	195	BPSL1445
BKP2_00742	LFMTQDALDKFRNSDGWAA	BPSL1445	125	MHKRNLVLKAAAALVVGSLALAGCTTTPDKPANAATNASKRQAIDASVDATLSRLYSTVRGSRELVAKSRGVLVFPDVIQAGLIIGGQTGNGALRVGGATVGYYNTSSLSVGLQAGAQSKAIVFLFMTQDALDKFRNSDGWAAGADASVALVKMGANGAIDTTTATAPVEVIVLTNAGLMGDVSISGTKVTKLKI	195	BPSL1445
BKP2_00743	MTQDALDKFRNSDGWAAGA	BPSL1445	127	MHKRNLVLKAAAALVVGSLALAGCTTTPDKPANAATNASKRQAIDASVDATLSRLYSTVRGSRELVAKSRGVLVFPDVIQAGLIIGGQTGNGALRVGGATVGYYNTSSLSVGLQAGAQSKAIVFLFMTQDALDKFRNSDGWAAGADASVALVKMGANGAIDTTTATAPVEVIVLTNAGLMGDVSISGTKVTKLKI	195	BPSL1445
BKP2_00744	QDALDKFRNSDGWAAGADA	BPSL1445	129	MHKRNLVLKAAAALVVGSLALAGCTTTPDKPANAATNASKRQAIDASVDATLSRLYSTVRGSRELVAKSRGVLVFPDVIQAGLIIGGQTGNGALRVGGATVGYYNTSSLSVGLQAGAQSKAIVFLFMTQDALDKFRNSDGWAAGADASVALVKMGANGAIDTTTATAPVEVIVLTNAGLMGDVSISGTKVTKLKI	195	BPSL1445
BKP2_00745	ALDKFRNSDGWAAGADASV	BPSL1445	131	MHKRNLVLKAAAALVVGSLALAGCTTTPDKPANAATNASKRQAIDASVDATLSRLYSTVRGSRELVAKSRGVLVFPDVIQAGLIIGGQTGNGALRVGGATVGYYNTSSLSVGLQAGAQSKAIVFLFMTQDALDKFRNSDGWAAGADASVALVKMGANGAIDTTTATAPVEVIVLTNAGLMGDVSISGTKVTKLKI	195	BPSL1445
BKP2_00746	DKFRNSDGWAAGADASVAL	BPSL1445	133	MHKRNLVLKAAAALVVGSLALAGCTTTPDKPANAATNASKRQAIDASVDATLSRLYSTVRGSRELVAKSRGVLVFPDVIQAGLIIGGQTGNGALRVGGATVGYYNTSSLSVGLQAGAQSKAIVFLFMTQDALDKFRNSDGWAAGADASVALVKMGANGAIDTTTATAPVEVIVLTNAGLMGDVSISGTKVTKLKI	195	BPSL1445
BKP2_00747	FRNSDGWAAGADASVALVK	BPSL1445	135	MHKRNLVLKAAAALVVGSLALAGCTTTPDKPANAATNASKRQAIDASVDATLSRLYSTVRGSRELVAKSRGVLVFPDVIQAGLIIGGQTGNGALRVGGATVGYYNTSSLSVGLQAGAQSKAIVFLFMTQDALDKFRNSDGWAAGADASVALVKMGANGAIDTTTATAPVEVIVLTNAGLMGDVSISGTKVTKLKI	195	BPSL1445
BKP2_00748	NSDGWAAGADASVALVKMG	BPSL1445	137	MHKRNLVLKAAAALVVGSLALAGCTTTPDKPANAATNASKRQAIDASVDATLSRLYSTVRGSRELVAKSRGVLVFPDVIQAGLIIGGQTGNGALRVGGATVGYYNTSSLSVGLQAGAQSKAIVFLFMTQDALDKFRNSDGWAAGADASVALVKMGANGAIDTTTATAPVEVIVLTNAGLMGDVSISGTKVTKLKI	195	BPSL1445
BKP2_00749	DGWAAGADASVALVKMGAN	BPSL1445	139	MHKRNLVLKAAAALVVGSLALAGCTTTPDKPANAATNASKRQAIDASVDATLSRLYSTVRGSRELVAKSRGVLVFPDVIQAGLIIGGQTGNGALRVGGATVGYYNTSSLSVGLQAGAQSKAIVFLFMTQDALDKFRNSDGWAAGADASVALVKMGANGAIDTTTATAPVEVIVLTNAGLMGDVSISGTKVTKLKI	195	BPSL1445
BKP2_00750	WAAGADASVALVKMGANGA	BPSL1445	141	MHKRNLVLKAAAALVVGSLALAGCTTTPDKPANAATNASKRQAIDASVDATLSRLYSTVRGSRELVAKSRGVLVFPDVIQAGLIIGGQTGNGALRVGGATVGYYNTSSLSVGLQAGAQSKAIVFLFMTQDALDKFRNSDGWAAGADASVALVKMGANGAIDTTTATAPVEVIVLTNAGLMGDVSISGTKVTKLKI	195	BPSL1445
BKP2_00751	AGADASVALVKMGANGAID	BPSL1445	143	MHKRNLVLKAAAALVVGSLALAGCTTTPDKPANAATNASKRQAIDASVDATLSRLYSTVRGSRELVAKSRGVLVFPDVIQAGLIIGGQTGNGALRVGGATVGYYNTSSLSVGLQAGAQSKAIVFLFMTQDALDKFRNSDGWAAGADASVALVKMGANGAIDTTTATAPVEVIVLTNAGLMGDVSISGTKVTKLKI	195	BPSL1445
BKP2_00752	ADASVALVKMGANGAIDTT	BPSL1445	145	MHKRNLVLKAAAALVVGSLALAGCTTTPDKPANAATNASKRQAIDASVDATLSRLYSTVRGSRELVAKSRGVLVFPDVIQAGLIIGGQTGNGALRVGGATVGYYNTSSLSVGLQAGAQSKAIVFLFMTQDALDKFRNSDGWAAGADASVALVKMGANGAIDTTTATAPVEVIVLTNAGLMGDVSISGTKVTKLKI	195	BPSL1445
BKP2_00753	ASVALVKMGANGAIDTTTA	BPSL1445	147	MHKRNLVLKAAAALVVGSLALAGCTTTPDKPANAATNASKRQAIDASVDATLSRLYSTVRGSRELVAKSRGVLVFPDVIQAGLIIGGQTGNGALRVGGATVGYYNTSSLSVGLQAGAQSKAIVFLFMTQDALDKFRNSDGWAAGADASVALVKMGANGAIDTTTATAPVEVIVLTNAGLMGDVSISGTKVTKLKI	195	BPSL1445
BKP2_00754	VALVKMGANGAIDTTTATA	BPSL1445	149	MHKRNLVLKAAAALVVGSLALAGCTTTPDKPANAATNASKRQAIDASVDATLSRLYSTVRGSRELVAKSRGVLVFPDVIQAGLIIGGQTGNGALRVGGATVGYYNTSSLSVGLQAGAQSKAIVFLFMTQDALDKFRNSDGWAAGADASVALVKMGANGAIDTTTATAPVEVIVLTNAGLMGDVSISGTKVTKLKI	195	BPSL1445
BKP2_00755	LVKMGANGAIDTTTATAPV	BPSL1445	151	MHKRNLVLKAAAALVVGSLALAGCTTTPDKPANAATNASKRQAIDASVDATLSRLYSTVRGSRELVAKSRGVLVFPDVIQAGLIIGGQTGNGALRVGGATVGYYNTSSLSVGLQAGAQSKAIVFLFMTQDALDKFRNSDGWAAGADASVALVKMGANGAIDTTTATAPVEVIVLTNAGLMGDVSISGTKVTKLKI	195	BPSL1445
BKP2_00756	KMGANGAIDTTTATAPVEV	BPSL1445	153	MHKRNLVLKAAAALVVGSLALAGCTTTPDKPANAATNASKRQAIDASVDATLSRLYSTVRGSRELVAKSRGVLVFPDVIQAGLIIGGQTGNGALRVGGATVGYYNTSSLSVGLQAGAQSKAIVFLFMTQDALDKFRNSDGWAAGADASVALVKMGANGAIDTTTATAPVEVIVLTNAGLMGDVSISGTKVTKLKI	195	BPSL1445
BKP2_00757	GANGAIDTTTATAPVEVIV	BPSL1445	155	MHKRNLVLKAAAALVVGSLALAGCTTTPDKPANAATNASKRQAIDASVDATLSRLYSTVRGSRELVAKSRGVLVFPDVIQAGLIIGGQTGNGALRVGGATVGYYNTSSLSVGLQAGAQSKAIVFLFMTQDALDKFRNSDGWAAGADASVALVKMGANGAIDTTTATAPVEVIVLTNAGLMGDVSISGTKVTKLKI	195	BPSL1445
BKP2_00758	NGAIDTTTATAPVEVIVLT	BPSL1445	157	MHKRNLVLKAAAALVVGSLALAGCTTTPDKPANAATNASKRQAIDASVDATLSRLYSTVRGSRELVAKSRGVLVFPDVIQAGLIIGGQTGNGALRVGGATVGYYNTSSLSVGLQAGAQSKAIVFLFMTQDALDKFRNSDGWAAGADASVALVKMGANGAIDTTTATAPVEVIVLTNAGLMGDVSISGTKVTKLKI	195	BPSL1445
BKP2_00759	AIDTTTATAPVEVIVLTNA	BPSL1445	159	MHKRNLVLKAAAALVVGSLALAGCTTTPDKPANAATNASKRQAIDASVDATLSRLYSTVRGSRELVAKSRGVLVFPDVIQAGLIIGGQTGNGALRVGGATVGYYNTSSLSVGLQAGAQSKAIVFLFMTQDALDKFRNSDGWAAGADASVALVKMGANGAIDTTTATAPVEVIVLTNAGLMGDVSISGTKVTKLKI	195	BPSL1445
BKP2_00760	DTTTATAPVEVIVLTNAGL	BPSL1445	161	MHKRNLVLKAAAALVVGSLALAGCTTTPDKPANAATNASKRQAIDASVDATLSRLYSTVRGSRELVAKSRGVLVFPDVIQAGLIIGGQTGNGALRVGGATVGYYNTSSLSVGLQAGAQSKAIVFLFMTQDALDKFRNSDGWAAGADASVALVKMGANGAIDTTTATAPVEVIVLTNAGLMGDVSISGTKVTKLKI	195	BPSL1445
BKP2_00761	TTATAPVEVIVLTNAGLMG	BPSL1445	163	MHKRNLVLKAAAALVVGSLALAGCTTTPDKPANAATNASKRQAIDASVDATLSRLYSTVRGSRELVAKSRGVLVFPDVIQAGLIIGGQTGNGALRVGGATVGYYNTSSLSVGLQAGAQSKAIVFLFMTQDALDKFRNSDGWAAGADASVALVKMGANGAIDTTTATAPVEVIVLTNAGLMGDVSISGTKVTKLKI	195	BPSL1445
BKP2_00762	ATAPVEVIVLTNAGLMGDV	BPSL1445	165	MHKRNLVLKAAAALVVGSLALAGCTTTPDKPANAATNASKRQAIDASVDATLSRLYSTVRGSRELVAKSRGVLVFPDVIQAGLIIGGQTGNGALRVGGATVGYYNTSSLSVGLQAGAQSKAIVFLFMTQDALDKFRNSDGWAAGADASVALVKMGANGAIDTTTATAPVEVIVLTNAGLMGDVSISGTKVTKLKI	195	BPSL1445
BKP2_00763	APVEVIVLTNAGLMGDVSI	BPSL1445	167	MHKRNLVLKAAAALVVGSLALAGCTTTPDKPANAATNASKRQAIDASVDATLSRLYSTVRGSRELVAKSRGVLVFPDVIQAGLIIGGQTGNGALRVGGATVGYYNTSSLSVGLQAGAQSKAIVFLFMTQDALDKFRNSDGWAAGADASVALVKMGANGAIDTTTATAPVEVIVLTNAGLMGDVSISGTKVTKLKI	195	BPSL1445
BKP2_00764	VEVIVLTNAGLMGDVSISG	BPSL1445	169	MHKRNLVLKAAAALVVGSLALAGCTTTPDKPANAATNASKRQAIDASVDATLSRLYSTVRGSRELVAKSRGVLVFPDVIQAGLIIGGQTGNGALRVGGATVGYYNTSSLSVGLQAGAQSKAIVFLFMTQDALDKFRNSDGWAAGADASVALVKMGANGAIDTTTATAPVEVIVLTNAGLMGDVSISGTKVTKLKI	195	BPSL1445
BKP2_00765	VIVLTNAGLMGDVSISGTK	BPSL1445	171	MHKRNLVLKAAAALVVGSLALAGCTTTPDKPANAATNASKRQAIDASVDATLSRLYSTVRGSRELVAKSRGVLVFPDVIQAGLIIGGQTGNGALRVGGATVGYYNTSSLSVGLQAGAQSKAIVFLFMTQDALDKFRNSDGWAAGADASVALVKMGANGAIDTTTATAPVEVIVLTNAGLMGDVSISGTKVTKLKI	195	BPSL1445
BKP2_00766	VLTNAGLMGDVSISGTKVT	BPSL1445	173	MHKRNLVLKAAAALVVGSLALAGCTTTPDKPANAATNASKRQAIDASVDATLSRLYSTVRGSRELVAKSRGVLVFPDVIQAGLIIGGQTGNGALRVGGATVGYYNTSSLSVGLQAGAQSKAIVFLFMTQDALDKFRNSDGWAAGADASVALVKMGANGAIDTTTATAPVEVIVLTNAGLMGDVSISGTKVTKLKI	195	BPSL1445
BKP2_00767	TNAGLMGDVSISGTKVTKL	BPSL1445	175	MHKRNLVLKAAAALVVGSLALAGCTTTPDKPANAATNASKRQAIDASVDATLSRLYSTVRGSRELVAKSRGVLVFPDVIQAGLIIGGQTGNGALRVGGATVGYYNTSSLSVGLQAGAQSKAIVFLFMTQDALDKFRNSDGWAAGADASVALVKMGANGAIDTTTATAPVEVIVLTNAGLMGDVSISGTKVTKLKI	195	BPSL1445
BKP2_00768	AGLMGDVSISGTKVTKLKI	BPSL1445	177	MHKRNLVLKAAAALVVGSLALAGCTTTPDKPANAATNASKRQAIDASVDATLSRLYSTVRGSRELVAKSRGVLVFPDVIQAGLIIGGQTGNGALRVGGATVGYYNTSSLSVGLQAGAQSKAIVFLFMTQDALDKFRNSDGWAAGADASVALVKMGANGAIDTTTATAPVEVIVLTNAGLMGDVSISGTKVTKLKI	195	BPSL1445
BKP2_00769	MNTKMLLIRAGKVTPTTLK	BPSL1661	1	MNTKMLLIRAGKVTPTTLKTLAVAGVDSGDEIVFSSLPANSELKRDGADLVVRTPDETFVLKDAAAKLADESVVVRLGEQPLVVTQAPNENTHLPAGVQLAGLAAPGQNSAFGLQSFVSAAGEQSLQSDTVSPVAMGAVTTSGIKDAGLSDGGLMGNLRTDVRPTDEIPMYQQKLTQLPLDPRIDVPSRTDFGVNAARYEPAPAAVTAPNFVMSPGDKDPGAGVLQNVTNPQLDGSGPANAVVTAYEVASDGHLISLGTATSDGTGNFAITPNTPLADGTHDIVFQAQKGDLTSPFSAPTSVVIDTKINTPTIGLPASSDSFGAGTVGTNHDDITNVTNPTLTGTAEAGATVYVSDGSGHTVSTIADSNGNYSVQAPGTLAEGNNVFTVQAVDKAGNTS…	3229	BPSL1661
BKP2_00770	TKMLLIRAGKVTPTTLKTL	BPSL1661	3	MNTKMLLIRAGKVTPTTLKTLAVAGVDSGDEIVFSSLPANSELKRDGADLVVRTPDETFVLKDAAAKLADESVVVRLGEQPLVVTQAPNENTHLPAGVQLAGLAAPGQNSAFGLQSFVSAAGEQSLQSDTVSPVAMGAVTTSGIKDAGLSDGGLMGNLRTDVRPTDEIPMYQQKLTQLPLDPRIDVPSRTDFGVNAARYEPAPAAVTAPNFVMSPGDKDPGAGVLQNVTNPQLDGSGPANAVVTAYEVASDGHLISLGTATSDGTGNFAITPNTPLADGTHDIVFQAQKGDLTSPFSAPTSVVIDTKINTPTIGLPASSDSFGAGTVGTNHDDITNVTNPTLTGTAEAGATVYVSDGSGHTVSTIADSNGNYSVQAPGTLAEGNNVFTVQAVDKAGNTS…	3229	BPSL1661
BKP2_00771	MLLIRAGKVTPTTLKTLAV	BPSL1661	5	MNTKMLLIRAGKVTPTTLKTLAVAGVDSGDEIVFSSLPANSELKRDGADLVVRTPDETFVLKDAAAKLADESVVVRLGEQPLVVTQAPNENTHLPAGVQLAGLAAPGQNSAFGLQSFVSAAGEQSLQSDTVSPVAMGAVTTSGIKDAGLSDGGLMGNLRTDVRPTDEIPMYQQKLTQLPLDPRIDVPSRTDFGVNAARYEPAPAAVTAPNFVMSPGDKDPGAGVLQNVTNPQLDGSGPANAVVTAYEVASDGHLISLGTATSDGTGNFAITPNTPLADGTHDIVFQAQKGDLTSPFSAPTSVVIDTKINTPTIGLPASSDSFGAGTVGTNHDDITNVTNPTLTGTAEAGATVYVSDGSGHTVSTIADSNGNYSVQAPGTLAEGNNVFTVQAVDKAGNTS…	3229	BPSL1661
BKP2_00772	LIRAGKVTPTTLKTLAVAG	BPSL1661	7	MNTKMLLIRAGKVTPTTLKTLAVAGVDSGDEIVFSSLPANSELKRDGADLVVRTPDETFVLKDAAAKLADESVVVRLGEQPLVVTQAPNENTHLPAGVQLAGLAAPGQNSAFGLQSFVSAAGEQSLQSDTVSPVAMGAVTTSGIKDAGLSDGGLMGNLRTDVRPTDEIPMYQQKLTQLPLDPRIDVPSRTDFGVNAARYEPAPAAVTAPNFVMSPGDKDPGAGVLQNVTNPQLDGSGPANAVVTAYEVASDGHLISLGTATSDGTGNFAITPNTPLADGTHDIVFQAQKGDLTSPFSAPTSVVIDTKINTPTIGLPASSDSFGAGTVGTNHDDITNVTNPTLTGTAEAGATVYVSDGSGHTVSTIADSNGNYSVQAPGTLAEGNNVFTVQAVDKAGNTS…	3229	BPSL1661
BKP2_00773	RAGKVTPTTLKTLAVAGVD	BPSL1661	9	MNTKMLLIRAGKVTPTTLKTLAVAGVDSGDEIVFSSLPANSELKRDGADLVVRTPDETFVLKDAAAKLADESVVVRLGEQPLVVTQAPNENTHLPAGVQLAGLAAPGQNSAFGLQSFVSAAGEQSLQSDTVSPVAMGAVTTSGIKDAGLSDGGLMGNLRTDVRPTDEIPMYQQKLTQLPLDPRIDVPSRTDFGVNAARYEPAPAAVTAPNFVMSPGDKDPGAGVLQNVTNPQLDGSGPANAVVTAYEVASDGHLISLGTATSDGTGNFAITPNTPLADGTHDIVFQAQKGDLTSPFSAPTSVVIDTKINTPTIGLPASSDSFGAGTVGTNHDDITNVTNPTLTGTAEAGATVYVSDGSGHTVSTIADSNGNYSVQAPGTLAEGNNVFTVQAVDKAGNTS…	3229	BPSL1661
BKP2_00774	GKVTPTTLKTLAVAGVDSG	BPSL1661	11	MNTKMLLIRAGKVTPTTLKTLAVAGVDSGDEIVFSSLPANSELKRDGADLVVRTPDETFVLKDAAAKLADESVVVRLGEQPLVVTQAPNENTHLPAGVQLAGLAAPGQNSAFGLQSFVSAAGEQSLQSDTVSPVAMGAVTTSGIKDAGLSDGGLMGNLRTDVRPTDEIPMYQQKLTQLPLDPRIDVPSRTDFGVNAARYEPAPAAVTAPNFVMSPGDKDPGAGVLQNVTNPQLDGSGPANAVVTAYEVASDGHLISLGTATSDGTGNFAITPNTPLADGTHDIVFQAQKGDLTSPFSAPTSVVIDTKINTPTIGLPASSDSFGAGTVGTNHDDITNVTNPTLTGTAEAGATVYVSDGSGHTVSTIADSNGNYSVQAPGTLAEGNNVFTVQAVDKAGNTS…	3229	BPSL1661
BKP2_00775	VTPTTLKTLAVAGVDSGDE	BPSL1661	13	MNTKMLLIRAGKVTPTTLKTLAVAGVDSGDEIVFSSLPANSELKRDGADLVVRTPDETFVLKDAAAKLADESVVVRLGEQPLVVTQAPNENTHLPAGVQLAGLAAPGQNSAFGLQSFVSAAGEQSLQSDTVSPVAMGAVTTSGIKDAGLSDGGLMGNLRTDVRPTDEIPMYQQKLTQLPLDPRIDVPSRTDFGVNAARYEPAPAAVTAPNFVMSPGDKDPGAGVLQNVTNPQLDGSGPANAVVTAYEVASDGHLISLGTATSDGTGNFAITPNTPLADGTHDIVFQAQKGDLTSPFSAPTSVVIDTKINTPTIGLPASSDSFGAGTVGTNHDDITNVTNPTLTGTAEAGATVYVSDGSGHTVSTIADSNGNYSVQAPGTLAEGNNVFTVQAVDKAGNTS…	3229	BPSL1661
BKP2_00776	PTTLKTLAVAGVDSGDEIV	BPSL1661	15	MNTKMLLIRAGKVTPTTLKTLAVAGVDSGDEIVFSSLPANSELKRDGADLVVRTPDETFVLKDAAAKLADESVVVRLGEQPLVVTQAPNENTHLPAGVQLAGLAAPGQNSAFGLQSFVSAAGEQSLQSDTVSPVAMGAVTTSGIKDAGLSDGGLMGNLRTDVRPTDEIPMYQQKLTQLPLDPRIDVPSRTDFGVNAARYEPAPAAVTAPNFVMSPGDKDPGAGVLQNVTNPQLDGSGPANAVVTAYEVASDGHLISLGTATSDGTGNFAITPNTPLADGTHDIVFQAQKGDLTSPFSAPTSVVIDTKINTPTIGLPASSDSFGAGTVGTNHDDITNVTNPTLTGTAEAGATVYVSDGSGHTVSTIADSNGNYSVQAPGTLAEGNNVFTVQAVDKAGNTS…	3229	BPSL1661
BKP2_00777	TLKTLAVAGVDSGDEIVFS	BPSL1661	17	MNTKMLLIRAGKVTPTTLKTLAVAGVDSGDEIVFSSLPANSELKRDGADLVVRTPDETFVLKDAAAKLADESVVVRLGEQPLVVTQAPNENTHLPAGVQLAGLAAPGQNSAFGLQSFVSAAGEQSLQSDTVSPVAMGAVTTSGIKDAGLSDGGLMGNLRTDVRPTDEIPMYQQKLTQLPLDPRIDVPSRTDFGVNAARYEPAPAAVTAPNFVMSPGDKDPGAGVLQNVTNPQLDGSGPANAVVTAYEVASDGHLISLGTATSDGTGNFAITPNTPLADGTHDIVFQAQKGDLTSPFSAPTSVVIDTKINTPTIGLPASSDSFGAGTVGTNHDDITNVTNPTLTGTAEAGATVYVSDGSGHTVSTIADSNGNYSVQAPGTLAEGNNVFTVQAVDKAGNTS…	3229	BPSL1661
BKP2_00778	KTLAVAGVDSGDEIVFSSL	BPSL1661	19	MNTKMLLIRAGKVTPTTLKTLAVAGVDSGDEIVFSSLPANSELKRDGADLVVRTPDETFVLKDAAAKLADESVVVRLGEQPLVVTQAPNENTHLPAGVQLAGLAAPGQNSAFGLQSFVSAAGEQSLQSDTVSPVAMGAVTTSGIKDAGLSDGGLMGNLRTDVRPTDEIPMYQQKLTQLPLDPRIDVPSRTDFGVNAARYEPAPAAVTAPNFVMSPGDKDPGAGVLQNVTNPQLDGSGPANAVVTAYEVASDGHLISLGTATSDGTGNFAITPNTPLADGTHDIVFQAQKGDLTSPFSAPTSVVIDTKINTPTIGLPASSDSFGAGTVGTNHDDITNVTNPTLTGTAEAGATVYVSDGSGHTVSTIADSNGNYSVQAPGTLAEGNNVFTVQAVDKAGNTS…	3229	BPSL1661
BKP2_00779	LAVAGVDSGDEIVFSSLPA	BPSL1661	21	MNTKMLLIRAGKVTPTTLKTLAVAGVDSGDEIVFSSLPANSELKRDGADLVVRTPDETFVLKDAAAKLADESVVVRLGEQPLVVTQAPNENTHLPAGVQLAGLAAPGQNSAFGLQSFVSAAGEQSLQSDTVSPVAMGAVTTSGIKDAGLSDGGLMGNLRTDVRPTDEIPMYQQKLTQLPLDPRIDVPSRTDFGVNAARYEPAPAAVTAPNFVMSPGDKDPGAGVLQNVTNPQLDGSGPANAVVTAYEVASDGHLISLGTATSDGTGNFAITPNTPLADGTHDIVFQAQKGDLTSPFSAPTSVVIDTKINTPTIGLPASSDSFGAGTVGTNHDDITNVTNPTLTGTAEAGATVYVSDGSGHTVSTIADSNGNYSVQAPGTLAEGNNVFTVQAVDKAGNTS…	3229	BPSL1661
BKP2_00780	VAGVDSGDEIVFSSLPANS	BPSL1661	23	MNTKMLLIRAGKVTPTTLKTLAVAGVDSGDEIVFSSLPANSELKRDGADLVVRTPDETFVLKDAAAKLADESVVVRLGEQPLVVTQAPNENTHLPAGVQLAGLAAPGQNSAFGLQSFVSAAGEQSLQSDTVSPVAMGAVTTSGIKDAGLSDGGLMGNLRTDVRPTDEIPMYQQKLTQLPLDPRIDVPSRTDFGVNAARYEPAPAAVTAPNFVMSPGDKDPGAGVLQNVTNPQLDGSGPANAVVTAYEVASDGHLISLGTATSDGTGNFAITPNTPLADGTHDIVFQAQKGDLTSPFSAPTSVVIDTKINTPTIGLPASSDSFGAGTVGTNHDDITNVTNPTLTGTAEAGATVYVSDGSGHTVSTIADSNGNYSVQAPGTLAEGNNVFTVQAVDKAGNTS…	3229	BPSL1661
BKP2_00781	GVDSGDEIVFSSLPANSEL	BPSL1661	25	MNTKMLLIRAGKVTPTTLKTLAVAGVDSGDEIVFSSLPANSELKRDGADLVVRTPDETFVLKDAAAKLADESVVVRLGEQPLVVTQAPNENTHLPAGVQLAGLAAPGQNSAFGLQSFVSAAGEQSLQSDTVSPVAMGAVTTSGIKDAGLSDGGLMGNLRTDVRPTDEIPMYQQKLTQLPLDPRIDVPSRTDFGVNAARYEPAPAAVTAPNFVMSPGDKDPGAGVLQNVTNPQLDGSGPANAVVTAYEVASDGHLISLGTATSDGTGNFAITPNTPLADGTHDIVFQAQKGDLTSPFSAPTSVVIDTKINTPTIGLPASSDSFGAGTVGTNHDDITNVTNPTLTGTAEAGATVYVSDGSGHTVSTIADSNGNYSVQAPGTLAEGNNVFTVQAVDKAGNTS…	3229	BPSL1661
BKP2_00782	DSGDEIVFSSLPANSELKR	BPSL1661	27	MNTKMLLIRAGKVTPTTLKTLAVAGVDSGDEIVFSSLPANSELKRDGADLVVRTPDETFVLKDAAAKLADESVVVRLGEQPLVVTQAPNENTHLPAGVQLAGLAAPGQNSAFGLQSFVSAAGEQSLQSDTVSPVAMGAVTTSGIKDAGLSDGGLMGNLRTDVRPTDEIPMYQQKLTQLPLDPRIDVPSRTDFGVNAARYEPAPAAVTAPNFVMSPGDKDPGAGVLQNVTNPQLDGSGPANAVVTAYEVASDGHLISLGTATSDGTGNFAITPNTPLADGTHDIVFQAQKGDLTSPFSAPTSVVIDTKINTPTIGLPASSDSFGAGTVGTNHDDITNVTNPTLTGTAEAGATVYVSDGSGHTVSTIADSNGNYSVQAPGTLAEGNNVFTVQAVDKAGNTS…	3229	BPSL1661
BKP2_00783	GDEIVFSSLPANSELKRDG	BPSL1661	29	MNTKMLLIRAGKVTPTTLKTLAVAGVDSGDEIVFSSLPANSELKRDGADLVVRTPDETFVLKDAAAKLADESVVVRLGEQPLVVTQAPNENTHLPAGVQLAGLAAPGQNSAFGLQSFVSAAGEQSLQSDTVSPVAMGAVTTSGIKDAGLSDGGLMGNLRTDVRPTDEIPMYQQKLTQLPLDPRIDVPSRTDFGVNAARYEPAPAAVTAPNFVMSPGDKDPGAGVLQNVTNPQLDGSGPANAVVTAYEVASDGHLISLGTATSDGTGNFAITPNTPLADGTHDIVFQAQKGDLTSPFSAPTSVVIDTKINTPTIGLPASSDSFGAGTVGTNHDDITNVTNPTLTGTAEAGATVYVSDGSGHTVSTIADSNGNYSVQAPGTLAEGNNVFTVQAVDKAGNTS…	3229	BPSL1661
BKP2_00784	EIVFSSLPANSELKRDGAD	BPSL1661	31	MNTKMLLIRAGKVTPTTLKTLAVAGVDSGDEIVFSSLPANSELKRDGADLVVRTPDETFVLKDAAAKLADESVVVRLGEQPLVVTQAPNENTHLPAGVQLAGLAAPGQNSAFGLQSFVSAAGEQSLQSDTVSPVAMGAVTTSGIKDAGLSDGGLMGNLRTDVRPTDEIPMYQQKLTQLPLDPRIDVPSRTDFGVNAARYEPAPAAVTAPNFVMSPGDKDPGAGVLQNVTNPQLDGSGPANAVVTAYEVASDGHLISLGTATSDGTGNFAITPNTPLADGTHDIVFQAQKGDLTSPFSAPTSVVIDTKINTPTIGLPASSDSFGAGTVGTNHDDITNVTNPTLTGTAEAGATVYVSDGSGHTVSTIADSNGNYSVQAPGTLAEGNNVFTVQAVDKAGNTS…	3229	BPSL1661
BKP2_00785	VFSSLPANSELKRDGADLV	BPSL1661	33	MNTKMLLIRAGKVTPTTLKTLAVAGVDSGDEIVFSSLPANSELKRDGADLVVRTPDETFVLKDAAAKLADESVVVRLGEQPLVVTQAPNENTHLPAGVQLAGLAAPGQNSAFGLQSFVSAAGEQSLQSDTVSPVAMGAVTTSGIKDAGLSDGGLMGNLRTDVRPTDEIPMYQQKLTQLPLDPRIDVPSRTDFGVNAARYEPAPAAVTAPNFVMSPGDKDPGAGVLQNVTNPQLDGSGPANAVVTAYEVASDGHLISLGTATSDGTGNFAITPNTPLADGTHDIVFQAQKGDLTSPFSAPTSVVIDTKINTPTIGLPASSDSFGAGTVGTNHDDITNVTNPTLTGTAEAGATVYVSDGSGHTVSTIADSNGNYSVQAPGTLAEGNNVFTVQAVDKAGNTS…	3229	BPSL1661
BKP2_00786	SSLPANSELKRDGADLVVR	BPSL1661	35	MNTKMLLIRAGKVTPTTLKTLAVAGVDSGDEIVFSSLPANSELKRDGADLVVRTPDETFVLKDAAAKLADESVVVRLGEQPLVVTQAPNENTHLPAGVQLAGLAAPGQNSAFGLQSFVSAAGEQSLQSDTVSPVAMGAVTTSGIKDAGLSDGGLMGNLRTDVRPTDEIPMYQQKLTQLPLDPRIDVPSRTDFGVNAARYEPAPAAVTAPNFVMSPGDKDPGAGVLQNVTNPQLDGSGPANAVVTAYEVASDGHLISLGTATSDGTGNFAITPNTPLADGTHDIVFQAQKGDLTSPFSAPTSVVIDTKINTPTIGLPASSDSFGAGTVGTNHDDITNVTNPTLTGTAEAGATVYVSDGSGHTVSTIADSNGNYSVQAPGTLAEGNNVFTVQAVDKAGNTS…	3229	BPSL1661
BKP2_00787	LPANSELKRDGADLVVRTP	BPSL1661	37	MNTKMLLIRAGKVTPTTLKTLAVAGVDSGDEIVFSSLPANSELKRDGADLVVRTPDETFVLKDAAAKLADESVVVRLGEQPLVVTQAPNENTHLPAGVQLAGLAAPGQNSAFGLQSFVSAAGEQSLQSDTVSPVAMGAVTTSGIKDAGLSDGGLMGNLRTDVRPTDEIPMYQQKLTQLPLDPRIDVPSRTDFGVNAARYEPAPAAVTAPNFVMSPGDKDPGAGVLQNVTNPQLDGSGPANAVVTAYEVASDGHLISLGTATSDGTGNFAITPNTPLADGTHDIVFQAQKGDLTSPFSAPTSVVIDTKINTPTIGLPASSDSFGAGTVGTNHDDITNVTNPTLTGTAEAGATVYVSDGSGHTVSTIADSNGNYSVQAPGTLAEGNNVFTVQAVDKAGNTS…	3229	BPSL1661
BKP2_00788	ANSELKRDGADLVVRTPDE	BPSL1661	39	MNTKMLLIRAGKVTPTTLKTLAVAGVDSGDEIVFSSLPANSELKRDGADLVVRTPDETFVLKDAAAKLADESVVVRLGEQPLVVTQAPNENTHLPAGVQLAGLAAPGQNSAFGLQSFVSAAGEQSLQSDTVSPVAMGAVTTSGIKDAGLSDGGLMGNLRTDVRPTDEIPMYQQKLTQLPLDPRIDVPSRTDFGVNAARYEPAPAAVTAPNFVMSPGDKDPGAGVLQNVTNPQLDGSGPANAVVTAYEVASDGHLISLGTATSDGTGNFAITPNTPLADGTHDIVFQAQKGDLTSPFSAPTSVVIDTKINTPTIGLPASSDSFGAGTVGTNHDDITNVTNPTLTGTAEAGATVYVSDGSGHTVSTIADSNGNYSVQAPGTLAEGNNVFTVQAVDKAGNTS…	3229	BPSL1661
BKP2_00789	SELKRDGADLVVRTPDETF	BPSL1661	41	MNTKMLLIRAGKVTPTTLKTLAVAGVDSGDEIVFSSLPANSELKRDGADLVVRTPDETFVLKDAAAKLADESVVVRLGEQPLVVTQAPNENTHLPAGVQLAGLAAPGQNSAFGLQSFVSAAGEQSLQSDTVSPVAMGAVTTSGIKDAGLSDGGLMGNLRTDVRPTDEIPMYQQKLTQLPLDPRIDVPSRTDFGVNAARYEPAPAAVTAPNFVMSPGDKDPGAGVLQNVTNPQLDGSGPANAVVTAYEVASDGHLISLGTATSDGTGNFAITPNTPLADGTHDIVFQAQKGDLTSPFSAPTSVVIDTKINTPTIGLPASSDSFGAGTVGTNHDDITNVTNPTLTGTAEAGATVYVSDGSGHTVSTIADSNGNYSVQAPGTLAEGNNVFTVQAVDKAGNTS…	3229	BPSL1661
BKP2_00790	LKRDGADLVVRTPDETFVL	BPSL1661	43	MNTKMLLIRAGKVTPTTLKTLAVAGVDSGDEIVFSSLPANSELKRDGADLVVRTPDETFVLKDAAAKLADESVVVRLGEQPLVVTQAPNENTHLPAGVQLAGLAAPGQNSAFGLQSFVSAAGEQSLQSDTVSPVAMGAVTTSGIKDAGLSDGGLMGNLRTDVRPTDEIPMYQQKLTQLPLDPRIDVPSRTDFGVNAARYEPAPAAVTAPNFVMSPGDKDPGAGVLQNVTNPQLDGSGPANAVVTAYEVASDGHLISLGTATSDGTGNFAITPNTPLADGTHDIVFQAQKGDLTSPFSAPTSVVIDTKINTPTIGLPASSDSFGAGTVGTNHDDITNVTNPTLTGTAEAGATVYVSDGSGHTVSTIADSNGNYSVQAPGTLAEGNNVFTVQAVDKAGNTS…	3229	BPSL1661
BKP2_00791	RDGADLVVRTPDETFVLKD	BPSL1661	45	MNTKMLLIRAGKVTPTTLKTLAVAGVDSGDEIVFSSLPANSELKRDGADLVVRTPDETFVLKDAAAKLADESVVVRLGEQPLVVTQAPNENTHLPAGVQLAGLAAPGQNSAFGLQSFVSAAGEQSLQSDTVSPVAMGAVTTSGIKDAGLSDGGLMGNLRTDVRPTDEIPMYQQKLTQLPLDPRIDVPSRTDFGVNAARYEPAPAAVTAPNFVMSPGDKDPGAGVLQNVTNPQLDGSGPANAVVTAYEVASDGHLISLGTATSDGTGNFAITPNTPLADGTHDIVFQAQKGDLTSPFSAPTSVVIDTKINTPTIGLPASSDSFGAGTVGTNHDDITNVTNPTLTGTAEAGATVYVSDGSGHTVSTIADSNGNYSVQAPGTLAEGNNVFTVQAVDKAGNTS…	3229	BPSL1661
BKP2_00792	GADLVVRTPDETFVLKDAA	BPSL1661	47	MNTKMLLIRAGKVTPTTLKTLAVAGVDSGDEIVFSSLPANSELKRDGADLVVRTPDETFVLKDAAAKLADESVVVRLGEQPLVVTQAPNENTHLPAGVQLAGLAAPGQNSAFGLQSFVSAAGEQSLQSDTVSPVAMGAVTTSGIKDAGLSDGGLMGNLRTDVRPTDEIPMYQQKLTQLPLDPRIDVPSRTDFGVNAARYEPAPAAVTAPNFVMSPGDKDPGAGVLQNVTNPQLDGSGPANAVVTAYEVASDGHLISLGTATSDGTGNFAITPNTPLADGTHDIVFQAQKGDLTSPFSAPTSVVIDTKINTPTIGLPASSDSFGAGTVGTNHDDITNVTNPTLTGTAEAGATVYVSDGSGHTVSTIADSNGNYSVQAPGTLAEGNNVFTVQAVDKAGNTS…	3229	BPSL1661
BKP2_00793	DLVVRTPDETFVLKDAAAK	BPSL1661	49	MNTKMLLIRAGKVTPTTLKTLAVAGVDSGDEIVFSSLPANSELKRDGADLVVRTPDETFVLKDAAAKLADESVVVRLGEQPLVVTQAPNENTHLPAGVQLAGLAAPGQNSAFGLQSFVSAAGEQSLQSDTVSPVAMGAVTTSGIKDAGLSDGGLMGNLRTDVRPTDEIPMYQQKLTQLPLDPRIDVPSRTDFGVNAARYEPAPAAVTAPNFVMSPGDKDPGAGVLQNVTNPQLDGSGPANAVVTAYEVASDGHLISLGTATSDGTGNFAITPNTPLADGTHDIVFQAQKGDLTSPFSAPTSVVIDTKINTPTIGLPASSDSFGAGTVGTNHDDITNVTNPTLTGTAEAGATVYVSDGSGHTVSTIADSNGNYSVQAPGTLAEGNNVFTVQAVDKAGNTS…	3229	BPSL1661
BKP2_00794	VVRTPDETFVLKDAAAKLA	BPSL1661	51	MNTKMLLIRAGKVTPTTLKTLAVAGVDSGDEIVFSSLPANSELKRDGADLVVRTPDETFVLKDAAAKLADESVVVRLGEQPLVVTQAPNENTHLPAGVQLAGLAAPGQNSAFGLQSFVSAAGEQSLQSDTVSPVAMGAVTTSGIKDAGLSDGGLMGNLRTDVRPTDEIPMYQQKLTQLPLDPRIDVPSRTDFGVNAARYEPAPAAVTAPNFVMSPGDKDPGAGVLQNVTNPQLDGSGPANAVVTAYEVASDGHLISLGTATSDGTGNFAITPNTPLADGTHDIVFQAQKGDLTSPFSAPTSVVIDTKINTPTIGLPASSDSFGAGTVGTNHDDITNVTNPTLTGTAEAGATVYVSDGSGHTVSTIADSNGNYSVQAPGTLAEGNNVFTVQAVDKAGNTS…	3229	BPSL1661
BKP2_00795	RTPDETFVLKDAAAKLADE	BPSL1661	53	MNTKMLLIRAGKVTPTTLKTLAVAGVDSGDEIVFSSLPANSELKRDGADLVVRTPDETFVLKDAAAKLADESVVVRLGEQPLVVTQAPNENTHLPAGVQLAGLAAPGQNSAFGLQSFVSAAGEQSLQSDTVSPVAMGAVTTSGIKDAGLSDGGLMGNLRTDVRPTDEIPMYQQKLTQLPLDPRIDVPSRTDFGVNAARYEPAPAAVTAPNFVMSPGDKDPGAGVLQNVTNPQLDGSGPANAVVTAYEVASDGHLISLGTATSDGTGNFAITPNTPLADGTHDIVFQAQKGDLTSPFSAPTSVVIDTKINTPTIGLPASSDSFGAGTVGTNHDDITNVTNPTLTGTAEAGATVYVSDGSGHTVSTIADSNGNYSVQAPGTLAEGNNVFTVQAVDKAGNTS…	3229	BPSL1661
BKP2_00796	PDETFVLKDAAAKLADESV	BPSL1661	55	MNTKMLLIRAGKVTPTTLKTLAVAGVDSGDEIVFSSLPANSELKRDGADLVVRTPDETFVLKDAAAKLADESVVVRLGEQPLVVTQAPNENTHLPAGVQLAGLAAPGQNSAFGLQSFVSAAGEQSLQSDTVSPVAMGAVTTSGIKDAGLSDGGLMGNLRTDVRPTDEIPMYQQKLTQLPLDPRIDVPSRTDFGVNAARYEPAPAAVTAPNFVMSPGDKDPGAGVLQNVTNPQLDGSGPANAVVTAYEVASDGHLISLGTATSDGTGNFAITPNTPLADGTHDIVFQAQKGDLTSPFSAPTSVVIDTKINTPTIGLPASSDSFGAGTVGTNHDDITNVTNPTLTGTAEAGATVYVSDGSGHTVSTIADSNGNYSVQAPGTLAEGNNVFTVQAVDKAGNTS…	3229	BPSL1661
BKP2_00797	ETFVLKDAAAKLADESVVV	BPSL1661	57	MNTKMLLIRAGKVTPTTLKTLAVAGVDSGDEIVFSSLPANSELKRDGADLVVRTPDETFVLKDAAAKLADESVVVRLGEQPLVVTQAPNENTHLPAGVQLAGLAAPGQNSAFGLQSFVSAAGEQSLQSDTVSPVAMGAVTTSGIKDAGLSDGGLMGNLRTDVRPTDEIPMYQQKLTQLPLDPRIDVPSRTDFGVNAARYEPAPAAVTAPNFVMSPGDKDPGAGVLQNVTNPQLDGSGPANAVVTAYEVASDGHLISLGTATSDGTGNFAITPNTPLADGTHDIVFQAQKGDLTSPFSAPTSVVIDTKINTPTIGLPASSDSFGAGTVGTNHDDITNVTNPTLTGTAEAGATVYVSDGSGHTVSTIADSNGNYSVQAPGTLAEGNNVFTVQAVDKAGNTS…	3229	BPSL1661
BKP2_00798	FVLKDAAAKLADESVVVRL	BPSL1661	59	MNTKMLLIRAGKVTPTTLKTLAVAGVDSGDEIVFSSLPANSELKRDGADLVVRTPDETFVLKDAAAKLADESVVVRLGEQPLVVTQAPNENTHLPAGVQLAGLAAPGQNSAFGLQSFVSAAGEQSLQSDTVSPVAMGAVTTSGIKDAGLSDGGLMGNLRTDVRPTDEIPMYQQKLTQLPLDPRIDVPSRTDFGVNAARYEPAPAAVTAPNFVMSPGDKDPGAGVLQNVTNPQLDGSGPANAVVTAYEVASDGHLISLGTATSDGTGNFAITPNTPLADGTHDIVFQAQKGDLTSPFSAPTSVVIDTKINTPTIGLPASSDSFGAGTVGTNHDDITNVTNPTLTGTAEAGATVYVSDGSGHTVSTIADSNGNYSVQAPGTLAEGNNVFTVQAVDKAGNTS…	3229	BPSL1661
BKP2_00799	LKDAAAKLADESVVVRLGE	BPSL1661	61	MNTKMLLIRAGKVTPTTLKTLAVAGVDSGDEIVFSSLPANSELKRDGADLVVRTPDETFVLKDAAAKLADESVVVRLGEQPLVVTQAPNENTHLPAGVQLAGLAAPGQNSAFGLQSFVSAAGEQSLQSDTVSPVAMGAVTTSGIKDAGLSDGGLMGNLRTDVRPTDEIPMYQQKLTQLPLDPRIDVPSRTDFGVNAARYEPAPAAVTAPNFVMSPGDKDPGAGVLQNVTNPQLDGSGPANAVVTAYEVASDGHLISLGTATSDGTGNFAITPNTPLADGTHDIVFQAQKGDLTSPFSAPTSVVIDTKINTPTIGLPASSDSFGAGTVGTNHDDITNVTNPTLTGTAEAGATVYVSDGSGHTVSTIADSNGNYSVQAPGTLAEGNNVFTVQAVDKAGNTS…	3229	BPSL1661
BKP2_00800	DAAAKLADESVVVRLGEQP	BPSL1661	63	MNTKMLLIRAGKVTPTTLKTLAVAGVDSGDEIVFSSLPANSELKRDGADLVVRTPDETFVLKDAAAKLADESVVVRLGEQPLVVTQAPNENTHLPAGVQLAGLAAPGQNSAFGLQSFVSAAGEQSLQSDTVSPVAMGAVTTSGIKDAGLSDGGLMGNLRTDVRPTDEIPMYQQKLTQLPLDPRIDVPSRTDFGVNAARYEPAPAAVTAPNFVMSPGDKDPGAGVLQNVTNPQLDGSGPANAVVTAYEVASDGHLISLGTATSDGTGNFAITPNTPLADGTHDIVFQAQKGDLTSPFSAPTSVVIDTKINTPTIGLPASSDSFGAGTVGTNHDDITNVTNPTLTGTAEAGATVYVSDGSGHTVSTIADSNGNYSVQAPGTLAEGNNVFTVQAVDKAGNTS…	3229	BPSL1661
BKP2_00801	AAKLADESVVVRLGEQPLV	BPSL1661	65	MNTKMLLIRAGKVTPTTLKTLAVAGVDSGDEIVFSSLPANSELKRDGADLVVRTPDETFVLKDAAAKLADESVVVRLGEQPLVVTQAPNENTHLPAGVQLAGLAAPGQNSAFGLQSFVSAAGEQSLQSDTVSPVAMGAVTTSGIKDAGLSDGGLMGNLRTDVRPTDEIPMYQQKLTQLPLDPRIDVPSRTDFGVNAARYEPAPAAVTAPNFVMSPGDKDPGAGVLQNVTNPQLDGSGPANAVVTAYEVASDGHLISLGTATSDGTGNFAITPNTPLADGTHDIVFQAQKGDLTSPFSAPTSVVIDTKINTPTIGLPASSDSFGAGTVGTNHDDITNVTNPTLTGTAEAGATVYVSDGSGHTVSTIADSNGNYSVQAPGTLAEGNNVFTVQAVDKAGNTS…	3229	BPSL1661
BKP2_00802	KLADESVVVRLGEQPLVVT	BPSL1661	67	MNTKMLLIRAGKVTPTTLKTLAVAGVDSGDEIVFSSLPANSELKRDGADLVVRTPDETFVLKDAAAKLADESVVVRLGEQPLVVTQAPNENTHLPAGVQLAGLAAPGQNSAFGLQSFVSAAGEQSLQSDTVSPVAMGAVTTSGIKDAGLSDGGLMGNLRTDVRPTDEIPMYQQKLTQLPLDPRIDVPSRTDFGVNAARYEPAPAAVTAPNFVMSPGDKDPGAGVLQNVTNPQLDGSGPANAVVTAYEVASDGHLISLGTATSDGTGNFAITPNTPLADGTHDIVFQAQKGDLTSPFSAPTSVVIDTKINTPTIGLPASSDSFGAGTVGTNHDDITNVTNPTLTGTAEAGATVYVSDGSGHTVSTIADSNGNYSVQAPGTLAEGNNVFTVQAVDKAGNTS…	3229	BPSL1661
BKP2_00803	ADESVVVRLGEQPLVVTQA	BPSL1661	69	MNTKMLLIRAGKVTPTTLKTLAVAGVDSGDEIVFSSLPANSELKRDGADLVVRTPDETFVLKDAAAKLADESVVVRLGEQPLVVTQAPNENTHLPAGVQLAGLAAPGQNSAFGLQSFVSAAGEQSLQSDTVSPVAMGAVTTSGIKDAGLSDGGLMGNLRTDVRPTDEIPMYQQKLTQLPLDPRIDVPSRTDFGVNAARYEPAPAAVTAPNFVMSPGDKDPGAGVLQNVTNPQLDGSGPANAVVTAYEVASDGHLISLGTATSDGTGNFAITPNTPLADGTHDIVFQAQKGDLTSPFSAPTSVVIDTKINTPTIGLPASSDSFGAGTVGTNHDDITNVTNPTLTGTAEAGATVYVSDGSGHTVSTIADSNGNYSVQAPGTLAEGNNVFTVQAVDKAGNTS…	3229	BPSL1661
BKP2_00804	ESVVVRLGEQPLVVTQAPN	BPSL1661	71	MNTKMLLIRAGKVTPTTLKTLAVAGVDSGDEIVFSSLPANSELKRDGADLVVRTPDETFVLKDAAAKLADESVVVRLGEQPLVVTQAPNENTHLPAGVQLAGLAAPGQNSAFGLQSFVSAAGEQSLQSDTVSPVAMGAVTTSGIKDAGLSDGGLMGNLRTDVRPTDEIPMYQQKLTQLPLDPRIDVPSRTDFGVNAARYEPAPAAVTAPNFVMSPGDKDPGAGVLQNVTNPQLDGSGPANAVVTAYEVASDGHLISLGTATSDGTGNFAITPNTPLADGTHDIVFQAQKGDLTSPFSAPTSVVIDTKINTPTIGLPASSDSFGAGTVGTNHDDITNVTNPTLTGTAEAGATVYVSDGSGHTVSTIADSNGNYSVQAPGTLAEGNNVFTVQAVDKAGNTS…	3229	BPSL1661
BKP2_00805	VVVRLGEQPLVVTQAPNEN	BPSL1661	73	MNTKMLLIRAGKVTPTTLKTLAVAGVDSGDEIVFSSLPANSELKRDGADLVVRTPDETFVLKDAAAKLADESVVVRLGEQPLVVTQAPNENTHLPAGVQLAGLAAPGQNSAFGLQSFVSAAGEQSLQSDTVSPVAMGAVTTSGIKDAGLSDGGLMGNLRTDVRPTDEIPMYQQKLTQLPLDPRIDVPSRTDFGVNAARYEPAPAAVTAPNFVMSPGDKDPGAGVLQNVTNPQLDGSGPANAVVTAYEVASDGHLISLGTATSDGTGNFAITPNTPLADGTHDIVFQAQKGDLTSPFSAPTSVVIDTKINTPTIGLPASSDSFGAGTVGTNHDDITNVTNPTLTGTAEAGATVYVSDGSGHTVSTIADSNGNYSVQAPGTLAEGNNVFTVQAVDKAGNTS…	3229	BPSL1661
BKP2_00806	VRLGEQPLVVTQAPNENTH	BPSL1661	75	MNTKMLLIRAGKVTPTTLKTLAVAGVDSGDEIVFSSLPANSELKRDGADLVVRTPDETFVLKDAAAKLADESVVVRLGEQPLVVTQAPNENTHLPAGVQLAGLAAPGQNSAFGLQSFVSAAGEQSLQSDTVSPVAMGAVTTSGIKDAGLSDGGLMGNLRTDVRPTDEIPMYQQKLTQLPLDPRIDVPSRTDFGVNAARYEPAPAAVTAPNFVMSPGDKDPGAGVLQNVTNPQLDGSGPANAVVTAYEVASDGHLISLGTATSDGTGNFAITPNTPLADGTHDIVFQAQKGDLTSPFSAPTSVVIDTKINTPTIGLPASSDSFGAGTVGTNHDDITNVTNPTLTGTAEAGATVYVSDGSGHTVSTIADSNGNYSVQAPGTLAEGNNVFTVQAVDKAGNTS…	3229	BPSL1661
BKP2_00807	LGEQPLVVTQAPNENTHLP	BPSL1661	77	MNTKMLLIRAGKVTPTTLKTLAVAGVDSGDEIVFSSLPANSELKRDGADLVVRTPDETFVLKDAAAKLADESVVVRLGEQPLVVTQAPNENTHLPAGVQLAGLAAPGQNSAFGLQSFVSAAGEQSLQSDTVSPVAMGAVTTSGIKDAGLSDGGLMGNLRTDVRPTDEIPMYQQKLTQLPLDPRIDVPSRTDFGVNAARYEPAPAAVTAPNFVMSPGDKDPGAGVLQNVTNPQLDGSGPANAVVTAYEVASDGHLISLGTATSDGTGNFAITPNTPLADGTHDIVFQAQKGDLTSPFSAPTSVVIDTKINTPTIGLPASSDSFGAGTVGTNHDDITNVTNPTLTGTAEAGATVYVSDGSGHTVSTIADSNGNYSVQAPGTLAEGNNVFTVQAVDKAGNTS…	3229	BPSL1661
BKP2_00808	EQPLVVTQAPNENTHLPAG	BPSL1661	79	MNTKMLLIRAGKVTPTTLKTLAVAGVDSGDEIVFSSLPANSELKRDGADLVVRTPDETFVLKDAAAKLADESVVVRLGEQPLVVTQAPNENTHLPAGVQLAGLAAPGQNSAFGLQSFVSAAGEQSLQSDTVSPVAMGAVTTSGIKDAGLSDGGLMGNLRTDVRPTDEIPMYQQKLTQLPLDPRIDVPSRTDFGVNAARYEPAPAAVTAPNFVMSPGDKDPGAGVLQNVTNPQLDGSGPANAVVTAYEVASDGHLISLGTATSDGTGNFAITPNTPLADGTHDIVFQAQKGDLTSPFSAPTSVVIDTKINTPTIGLPASSDSFGAGTVGTNHDDITNVTNPTLTGTAEAGATVYVSDGSGHTVSTIADSNGNYSVQAPGTLAEGNNVFTVQAVDKAGNTS…	3229	BPSL1661
BKP2_00809	PLVVTQAPNENTHLPAGVQ	BPSL1661	81	MNTKMLLIRAGKVTPTTLKTLAVAGVDSGDEIVFSSLPANSELKRDGADLVVRTPDETFVLKDAAAKLADESVVVRLGEQPLVVTQAPNENTHLPAGVQLAGLAAPGQNSAFGLQSFVSAAGEQSLQSDTVSPVAMGAVTTSGIKDAGLSDGGLMGNLRTDVRPTDEIPMYQQKLTQLPLDPRIDVPSRTDFGVNAARYEPAPAAVTAPNFVMSPGDKDPGAGVLQNVTNPQLDGSGPANAVVTAYEVASDGHLISLGTATSDGTGNFAITPNTPLADGTHDIVFQAQKGDLTSPFSAPTSVVIDTKINTPTIGLPASSDSFGAGTVGTNHDDITNVTNPTLTGTAEAGATVYVSDGSGHTVSTIADSNGNYSVQAPGTLAEGNNVFTVQAVDKAGNTS…	3229	BPSL1661
BKP2_00810	VVTQAPNENTHLPAGVQLA	BPSL1661	83	MNTKMLLIRAGKVTPTTLKTLAVAGVDSGDEIVFSSLPANSELKRDGADLVVRTPDETFVLKDAAAKLADESVVVRLGEQPLVVTQAPNENTHLPAGVQLAGLAAPGQNSAFGLQSFVSAAGEQSLQSDTVSPVAMGAVTTSGIKDAGLSDGGLMGNLRTDVRPTDEIPMYQQKLTQLPLDPRIDVPSRTDFGVNAARYEPAPAAVTAPNFVMSPGDKDPGAGVLQNVTNPQLDGSGPANAVVTAYEVASDGHLISLGTATSDGTGNFAITPNTPLADGTHDIVFQAQKGDLTSPFSAPTSVVIDTKINTPTIGLPASSDSFGAGTVGTNHDDITNVTNPTLTGTAEAGATVYVSDGSGHTVSTIADSNGNYSVQAPGTLAEGNNVFTVQAVDKAGNTS…	3229	BPSL1661
BKP2_00811	TQAPNENTHLPAGVQLAGL	BPSL1661	85	MNTKMLLIRAGKVTPTTLKTLAVAGVDSGDEIVFSSLPANSELKRDGADLVVRTPDETFVLKDAAAKLADESVVVRLGEQPLVVTQAPNENTHLPAGVQLAGLAAPGQNSAFGLQSFVSAAGEQSLQSDTVSPVAMGAVTTSGIKDAGLSDGGLMGNLRTDVRPTDEIPMYQQKLTQLPLDPRIDVPSRTDFGVNAARYEPAPAAVTAPNFVMSPGDKDPGAGVLQNVTNPQLDGSGPANAVVTAYEVASDGHLISLGTATSDGTGNFAITPNTPLADGTHDIVFQAQKGDLTSPFSAPTSVVIDTKINTPTIGLPASSDSFGAGTVGTNHDDITNVTNPTLTGTAEAGATVYVSDGSGHTVSTIADSNGNYSVQAPGTLAEGNNVFTVQAVDKAGNTS…	3229	BPSL1661
BKP2_00812	APNENTHLPAGVQLAGLAA	BPSL1661	87	MNTKMLLIRAGKVTPTTLKTLAVAGVDSGDEIVFSSLPANSELKRDGADLVVRTPDETFVLKDAAAKLADESVVVRLGEQPLVVTQAPNENTHLPAGVQLAGLAAPGQNSAFGLQSFVSAAGEQSLQSDTVSPVAMGAVTTSGIKDAGLSDGGLMGNLRTDVRPTDEIPMYQQKLTQLPLDPRIDVPSRTDFGVNAARYEPAPAAVTAPNFVMSPGDKDPGAGVLQNVTNPQLDGSGPANAVVTAYEVASDGHLISLGTATSDGTGNFAITPNTPLADGTHDIVFQAQKGDLTSPFSAPTSVVIDTKINTPTIGLPASSDSFGAGTVGTNHDDITNVTNPTLTGTAEAGATVYVSDGSGHTVSTIADSNGNYSVQAPGTLAEGNNVFTVQAVDKAGNTS…	3229	BPSL1661
BKP2_00813	NENTHLPAGVQLAGLAAPG	BPSL1661	89	MNTKMLLIRAGKVTPTTLKTLAVAGVDSGDEIVFSSLPANSELKRDGADLVVRTPDETFVLKDAAAKLADESVVVRLGEQPLVVTQAPNENTHLPAGVQLAGLAAPGQNSAFGLQSFVSAAGEQSLQSDTVSPVAMGAVTTSGIKDAGLSDGGLMGNLRTDVRPTDEIPMYQQKLTQLPLDPRIDVPSRTDFGVNAARYEPAPAAVTAPNFVMSPGDKDPGAGVLQNVTNPQLDGSGPANAVVTAYEVASDGHLISLGTATSDGTGNFAITPNTPLADGTHDIVFQAQKGDLTSPFSAPTSVVIDTKINTPTIGLPASSDSFGAGTVGTNHDDITNVTNPTLTGTAEAGATVYVSDGSGHTVSTIADSNGNYSVQAPGTLAEGNNVFTVQAVDKAGNTS…	3229	BPSL1661
BKP2_00814	NTHLPAGVQLAGLAAPGQN	BPSL1661	91	MNTKMLLIRAGKVTPTTLKTLAVAGVDSGDEIVFSSLPANSELKRDGADLVVRTPDETFVLKDAAAKLADESVVVRLGEQPLVVTQAPNENTHLPAGVQLAGLAAPGQNSAFGLQSFVSAAGEQSLQSDTVSPVAMGAVTTSGIKDAGLSDGGLMGNLRTDVRPTDEIPMYQQKLTQLPLDPRIDVPSRTDFGVNAARYEPAPAAVTAPNFVMSPGDKDPGAGVLQNVTNPQLDGSGPANAVVTAYEVASDGHLISLGTATSDGTGNFAITPNTPLADGTHDIVFQAQKGDLTSPFSAPTSVVIDTKINTPTIGLPASSDSFGAGTVGTNHDDITNVTNPTLTGTAEAGATVYVSDGSGHTVSTIADSNGNYSVQAPGTLAEGNNVFTVQAVDKAGNTS…	3229	BPSL1661
BKP2_00815	HLPAGVQLAGLAAPGQNSA	BPSL1661	93	MNTKMLLIRAGKVTPTTLKTLAVAGVDSGDEIVFSSLPANSELKRDGADLVVRTPDETFVLKDAAAKLADESVVVRLGEQPLVVTQAPNENTHLPAGVQLAGLAAPGQNSAFGLQSFVSAAGEQSLQSDTVSPVAMGAVTTSGIKDAGLSDGGLMGNLRTDVRPTDEIPMYQQKLTQLPLDPRIDVPSRTDFGVNAARYEPAPAAVTAPNFVMSPGDKDPGAGVLQNVTNPQLDGSGPANAVVTAYEVASDGHLISLGTATSDGTGNFAITPNTPLADGTHDIVFQAQKGDLTSPFSAPTSVVIDTKINTPTIGLPASSDSFGAGTVGTNHDDITNVTNPTLTGTAEAGATVYVSDGSGHTVSTIADSNGNYSVQAPGTLAEGNNVFTVQAVDKAGNTS…	3229	BPSL1661
BKP2_00816	PAGVQLAGLAAPGQNSAFG	BPSL1661	95	MNTKMLLIRAGKVTPTTLKTLAVAGVDSGDEIVFSSLPANSELKRDGADLVVRTPDETFVLKDAAAKLADESVVVRLGEQPLVVTQAPNENTHLPAGVQLAGLAAPGQNSAFGLQSFVSAAGEQSLQSDTVSPVAMGAVTTSGIKDAGLSDGGLMGNLRTDVRPTDEIPMYQQKLTQLPLDPRIDVPSRTDFGVNAARYEPAPAAVTAPNFVMSPGDKDPGAGVLQNVTNPQLDGSGPANAVVTAYEVASDGHLISLGTATSDGTGNFAITPNTPLADGTHDIVFQAQKGDLTSPFSAPTSVVIDTKINTPTIGLPASSDSFGAGTVGTNHDDITNVTNPTLTGTAEAGATVYVSDGSGHTVSTIADSNGNYSVQAPGTLAEGNNVFTVQAVDKAGNTS…	3229	BPSL1661
BKP2_00817	GVQLAGLAAPGQNSAFGLQ	BPSL1661	97	MNTKMLLIRAGKVTPTTLKTLAVAGVDSGDEIVFSSLPANSELKRDGADLVVRTPDETFVLKDAAAKLADESVVVRLGEQPLVVTQAPNENTHLPAGVQLAGLAAPGQNSAFGLQSFVSAAGEQSLQSDTVSPVAMGAVTTSGIKDAGLSDGGLMGNLRTDVRPTDEIPMYQQKLTQLPLDPRIDVPSRTDFGVNAARYEPAPAAVTAPNFVMSPGDKDPGAGVLQNVTNPQLDGSGPANAVVTAYEVASDGHLISLGTATSDGTGNFAITPNTPLADGTHDIVFQAQKGDLTSPFSAPTSVVIDTKINTPTIGLPASSDSFGAGTVGTNHDDITNVTNPTLTGTAEAGATVYVSDGSGHTVSTIADSNGNYSVQAPGTLAEGNNVFTVQAVDKAGNTS…	3229	BPSL1661
BKP2_00818	QLAGLAAPGQNSAFGLQSF	BPSL1661	99	MNTKMLLIRAGKVTPTTLKTLAVAGVDSGDEIVFSSLPANSELKRDGADLVVRTPDETFVLKDAAAKLADESVVVRLGEQPLVVTQAPNENTHLPAGVQLAGLAAPGQNSAFGLQSFVSAAGEQSLQSDTVSPVAMGAVTTSGIKDAGLSDGGLMGNLRTDVRPTDEIPMYQQKLTQLPLDPRIDVPSRTDFGVNAARYEPAPAAVTAPNFVMSPGDKDPGAGVLQNVTNPQLDGSGPANAVVTAYEVASDGHLISLGTATSDGTGNFAITPNTPLADGTHDIVFQAQKGDLTSPFSAPTSVVIDTKINTPTIGLPASSDSFGAGTVGTNHDDITNVTNPTLTGTAEAGATVYVSDGSGHTVSTIADSNGNYSVQAPGTLAEGNNVFTVQAVDKAGNTS…	3229	BPSL1661
BKP2_00819	AGLAAPGQNSAFGLQSFVS	BPSL1661	101	MNTKMLLIRAGKVTPTTLKTLAVAGVDSGDEIVFSSLPANSELKRDGADLVVRTPDETFVLKDAAAKLADESVVVRLGEQPLVVTQAPNENTHLPAGVQLAGLAAPGQNSAFGLQSFVSAAGEQSLQSDTVSPVAMGAVTTSGIKDAGLSDGGLMGNLRTDVRPTDEIPMYQQKLTQLPLDPRIDVPSRTDFGVNAARYEPAPAAVTAPNFVMSPGDKDPGAGVLQNVTNPQLDGSGPANAVVTAYEVASDGHLISLGTATSDGTGNFAITPNTPLADGTHDIVFQAQKGDLTSPFSAPTSVVIDTKINTPTIGLPASSDSFGAGTVGTNHDDITNVTNPTLTGTAEAGATVYVSDGSGHTVSTIADSNGNYSVQAPGTLAEGNNVFTVQAVDKAGNTS…	3229	BPSL1661
BKP2_00820	LAAPGQNSAFGLQSFVSAA	BPSL1661	103	MNTKMLLIRAGKVTPTTLKTLAVAGVDSGDEIVFSSLPANSELKRDGADLVVRTPDETFVLKDAAAKLADESVVVRLGEQPLVVTQAPNENTHLPAGVQLAGLAAPGQNSAFGLQSFVSAAGEQSLQSDTVSPVAMGAVTTSGIKDAGLSDGGLMGNLRTDVRPTDEIPMYQQKLTQLPLDPRIDVPSRTDFGVNAARYEPAPAAVTAPNFVMSPGDKDPGAGVLQNVTNPQLDGSGPANAVVTAYEVASDGHLISLGTATSDGTGNFAITPNTPLADGTHDIVFQAQKGDLTSPFSAPTSVVIDTKINTPTIGLPASSDSFGAGTVGTNHDDITNVTNPTLTGTAEAGATVYVSDGSGHTVSTIADSNGNYSVQAPGTLAEGNNVFTVQAVDKAGNTS…	3229	BPSL1661
BKP2_00821	APGQNSAFGLQSFVSAAGE	BPSL1661	105	MNTKMLLIRAGKVTPTTLKTLAVAGVDSGDEIVFSSLPANSELKRDGADLVVRTPDETFVLKDAAAKLADESVVVRLGEQPLVVTQAPNENTHLPAGVQLAGLAAPGQNSAFGLQSFVSAAGEQSLQSDTVSPVAMGAVTTSGIKDAGLSDGGLMGNLRTDVRPTDEIPMYQQKLTQLPLDPRIDVPSRTDFGVNAARYEPAPAAVTAPNFVMSPGDKDPGAGVLQNVTNPQLDGSGPANAVVTAYEVASDGHLISLGTATSDGTGNFAITPNTPLADGTHDIVFQAQKGDLTSPFSAPTSVVIDTKINTPTIGLPASSDSFGAGTVGTNHDDITNVTNPTLTGTAEAGATVYVSDGSGHTVSTIADSNGNYSVQAPGTLAEGNNVFTVQAVDKAGNTS…	3229	BPSL1661
BKP2_00822	GQNSAFGLQSFVSAAGEQS	BPSL1661	107	MNTKMLLIRAGKVTPTTLKTLAVAGVDSGDEIVFSSLPANSELKRDGADLVVRTPDETFVLKDAAAKLADESVVVRLGEQPLVVTQAPNENTHLPAGVQLAGLAAPGQNSAFGLQSFVSAAGEQSLQSDTVSPVAMGAVTTSGIKDAGLSDGGLMGNLRTDVRPTDEIPMYQQKLTQLPLDPRIDVPSRTDFGVNAARYEPAPAAVTAPNFVMSPGDKDPGAGVLQNVTNPQLDGSGPANAVVTAYEVASDGHLISLGTATSDGTGNFAITPNTPLADGTHDIVFQAQKGDLTSPFSAPTSVVIDTKINTPTIGLPASSDSFGAGTVGTNHDDITNVTNPTLTGTAEAGATVYVSDGSGHTVSTIADSNGNYSVQAPGTLAEGNNVFTVQAVDKAGNTS…	3229	BPSL1661
BKP2_00823	NSAFGLQSFVSAAGEQSLQ	BPSL1661	109	MNTKMLLIRAGKVTPTTLKTLAVAGVDSGDEIVFSSLPANSELKRDGADLVVRTPDETFVLKDAAAKLADESVVVRLGEQPLVVTQAPNENTHLPAGVQLAGLAAPGQNSAFGLQSFVSAAGEQSLQSDTVSPVAMGAVTTSGIKDAGLSDGGLMGNLRTDVRPTDEIPMYQQKLTQLPLDPRIDVPSRTDFGVNAARYEPAPAAVTAPNFVMSPGDKDPGAGVLQNVTNPQLDGSGPANAVVTAYEVASDGHLISLGTATSDGTGNFAITPNTPLADGTHDIVFQAQKGDLTSPFSAPTSVVIDTKINTPTIGLPASSDSFGAGTVGTNHDDITNVTNPTLTGTAEAGATVYVSDGSGHTVSTIADSNGNYSVQAPGTLAEGNNVFTVQAVDKAGNTS…	3229	BPSL1661
BKP2_00824	AFGLQSFVSAAGEQSLQSD	BPSL1661	111	MNTKMLLIRAGKVTPTTLKTLAVAGVDSGDEIVFSSLPANSELKRDGADLVVRTPDETFVLKDAAAKLADESVVVRLGEQPLVVTQAPNENTHLPAGVQLAGLAAPGQNSAFGLQSFVSAAGEQSLQSDTVSPVAMGAVTTSGIKDAGLSDGGLMGNLRTDVRPTDEIPMYQQKLTQLPLDPRIDVPSRTDFGVNAARYEPAPAAVTAPNFVMSPGDKDPGAGVLQNVTNPQLDGSGPANAVVTAYEVASDGHLISLGTATSDGTGNFAITPNTPLADGTHDIVFQAQKGDLTSPFSAPTSVVIDTKINTPTIGLPASSDSFGAGTVGTNHDDITNVTNPTLTGTAEAGATVYVSDGSGHTVSTIADSNGNYSVQAPGTLAEGNNVFTVQAVDKAGNTS…	3229	BPSL1661
BKP2_00825	GLQSFVSAAGEQSLQSDTV	BPSL1661	113	MNTKMLLIRAGKVTPTTLKTLAVAGVDSGDEIVFSSLPANSELKRDGADLVVRTPDETFVLKDAAAKLADESVVVRLGEQPLVVTQAPNENTHLPAGVQLAGLAAPGQNSAFGLQSFVSAAGEQSLQSDTVSPVAMGAVTTSGIKDAGLSDGGLMGNLRTDVRPTDEIPMYQQKLTQLPLDPRIDVPSRTDFGVNAARYEPAPAAVTAPNFVMSPGDKDPGAGVLQNVTNPQLDGSGPANAVVTAYEVASDGHLISLGTATSDGTGNFAITPNTPLADGTHDIVFQAQKGDLTSPFSAPTSVVIDTKINTPTIGLPASSDSFGAGTVGTNHDDITNVTNPTLTGTAEAGATVYVSDGSGHTVSTIADSNGNYSVQAPGTLAEGNNVFTVQAVDKAGNTS…	3229	BPSL1661
BKP2_00826	QSFVSAAGEQSLQSDTVSP	BPSL1661	115	MNTKMLLIRAGKVTPTTLKTLAVAGVDSGDEIVFSSLPANSELKRDGADLVVRTPDETFVLKDAAAKLADESVVVRLGEQPLVVTQAPNENTHLPAGVQLAGLAAPGQNSAFGLQSFVSAAGEQSLQSDTVSPVAMGAVTTSGIKDAGLSDGGLMGNLRTDVRPTDEIPMYQQKLTQLPLDPRIDVPSRTDFGVNAARYEPAPAAVTAPNFVMSPGDKDPGAGVLQNVTNPQLDGSGPANAVVTAYEVASDGHLISLGTATSDGTGNFAITPNTPLADGTHDIVFQAQKGDLTSPFSAPTSVVIDTKINTPTIGLPASSDSFGAGTVGTNHDDITNVTNPTLTGTAEAGATVYVSDGSGHTVSTIADSNGNYSVQAPGTLAEGNNVFTVQAVDKAGNTS…	3229	BPSL1661
BKP2_00827	FVSAAGEQSLQSDTVSPVA	BPSL1661	117	MNTKMLLIRAGKVTPTTLKTLAVAGVDSGDEIVFSSLPANSELKRDGADLVVRTPDETFVLKDAAAKLADESVVVRLGEQPLVVTQAPNENTHLPAGVQLAGLAAPGQNSAFGLQSFVSAAGEQSLQSDTVSPVAMGAVTTSGIKDAGLSDGGLMGNLRTDVRPTDEIPMYQQKLTQLPLDPRIDVPSRTDFGVNAARYEPAPAAVTAPNFVMSPGDKDPGAGVLQNVTNPQLDGSGPANAVVTAYEVASDGHLISLGTATSDGTGNFAITPNTPLADGTHDIVFQAQKGDLTSPFSAPTSVVIDTKINTPTIGLPASSDSFGAGTVGTNHDDITNVTNPTLTGTAEAGATVYVSDGSGHTVSTIADSNGNYSVQAPGTLAEGNNVFTVQAVDKAGNTS…	3229	BPSL1661
BKP2_00828	SAAGEQSLQSDTVSPVAMG	BPSL1661	119	MNTKMLLIRAGKVTPTTLKTLAVAGVDSGDEIVFSSLPANSELKRDGADLVVRTPDETFVLKDAAAKLADESVVVRLGEQPLVVTQAPNENTHLPAGVQLAGLAAPGQNSAFGLQSFVSAAGEQSLQSDTVSPVAMGAVTTSGIKDAGLSDGGLMGNLRTDVRPTDEIPMYQQKLTQLPLDPRIDVPSRTDFGVNAARYEPAPAAVTAPNFVMSPGDKDPGAGVLQNVTNPQLDGSGPANAVVTAYEVASDGHLISLGTATSDGTGNFAITPNTPLADGTHDIVFQAQKGDLTSPFSAPTSVVIDTKINTPTIGLPASSDSFGAGTVGTNHDDITNVTNPTLTGTAEAGATVYVSDGSGHTVSTIADSNGNYSVQAPGTLAEGNNVFTVQAVDKAGNTS…	3229	BPSL1661
BKP2_00829	AGEQSLQSDTVSPVAMGAV	BPSL1661	121	MNTKMLLIRAGKVTPTTLKTLAVAGVDSGDEIVFSSLPANSELKRDGADLVVRTPDETFVLKDAAAKLADESVVVRLGEQPLVVTQAPNENTHLPAGVQLAGLAAPGQNSAFGLQSFVSAAGEQSLQSDTVSPVAMGAVTTSGIKDAGLSDGGLMGNLRTDVRPTDEIPMYQQKLTQLPLDPRIDVPSRTDFGVNAARYEPAPAAVTAPNFVMSPGDKDPGAGVLQNVTNPQLDGSGPANAVVTAYEVASDGHLISLGTATSDGTGNFAITPNTPLADGTHDIVFQAQKGDLTSPFSAPTSVVIDTKINTPTIGLPASSDSFGAGTVGTNHDDITNVTNPTLTGTAEAGATVYVSDGSGHTVSTIADSNGNYSVQAPGTLAEGNNVFTVQAVDKAGNTS…	3229	BPSL1661
BKP2_00830	EQSLQSDTVSPVAMGAVTT	BPSL1661	123	MNTKMLLIRAGKVTPTTLKTLAVAGVDSGDEIVFSSLPANSELKRDGADLVVRTPDETFVLKDAAAKLADESVVVRLGEQPLVVTQAPNENTHLPAGVQLAGLAAPGQNSAFGLQSFVSAAGEQSLQSDTVSPVAMGAVTTSGIKDAGLSDGGLMGNLRTDVRPTDEIPMYQQKLTQLPLDPRIDVPSRTDFGVNAARYEPAPAAVTAPNFVMSPGDKDPGAGVLQNVTNPQLDGSGPANAVVTAYEVASDGHLISLGTATSDGTGNFAITPNTPLADGTHDIVFQAQKGDLTSPFSAPTSVVIDTKINTPTIGLPASSDSFGAGTVGTNHDDITNVTNPTLTGTAEAGATVYVSDGSGHTVSTIADSNGNYSVQAPGTLAEGNNVFTVQAVDKAGNTS…	3229	BPSL1661
BKP2_00831	SLQSDTVSPVAMGAVTTSG	BPSL1661	125	MNTKMLLIRAGKVTPTTLKTLAVAGVDSGDEIVFSSLPANSELKRDGADLVVRTPDETFVLKDAAAKLADESVVVRLGEQPLVVTQAPNENTHLPAGVQLAGLAAPGQNSAFGLQSFVSAAGEQSLQSDTVSPVAMGAVTTSGIKDAGLSDGGLMGNLRTDVRPTDEIPMYQQKLTQLPLDPRIDVPSRTDFGVNAARYEPAPAAVTAPNFVMSPGDKDPGAGVLQNVTNPQLDGSGPANAVVTAYEVASDGHLISLGTATSDGTGNFAITPNTPLADGTHDIVFQAQKGDLTSPFSAPTSVVIDTKINTPTIGLPASSDSFGAGTVGTNHDDITNVTNPTLTGTAEAGATVYVSDGSGHTVSTIADSNGNYSVQAPGTLAEGNNVFTVQAVDKAGNTS…	3229	BPSL1661
BKP2_00832	QSDTVSPVAMGAVTTSGIK	BPSL1661	127	MNTKMLLIRAGKVTPTTLKTLAVAGVDSGDEIVFSSLPANSELKRDGADLVVRTPDETFVLKDAAAKLADESVVVRLGEQPLVVTQAPNENTHLPAGVQLAGLAAPGQNSAFGLQSFVSAAGEQSLQSDTVSPVAMGAVTTSGIKDAGLSDGGLMGNLRTDVRPTDEIPMYQQKLTQLPLDPRIDVPSRTDFGVNAARYEPAPAAVTAPNFVMSPGDKDPGAGVLQNVTNPQLDGSGPANAVVTAYEVASDGHLISLGTATSDGTGNFAITPNTPLADGTHDIVFQAQKGDLTSPFSAPTSVVIDTKINTPTIGLPASSDSFGAGTVGTNHDDITNVTNPTLTGTAEAGATVYVSDGSGHTVSTIADSNGNYSVQAPGTLAEGNNVFTVQAVDKAGNTS…	3229	BPSL1661
BKP2_00833	DTVSPVAMGAVTTSGIKDA	BPSL1661	129	MNTKMLLIRAGKVTPTTLKTLAVAGVDSGDEIVFSSLPANSELKRDGADLVVRTPDETFVLKDAAAKLADESVVVRLGEQPLVVTQAPNENTHLPAGVQLAGLAAPGQNSAFGLQSFVSAAGEQSLQSDTVSPVAMGAVTTSGIKDAGLSDGGLMGNLRTDVRPTDEIPMYQQKLTQLPLDPRIDVPSRTDFGVNAARYEPAPAAVTAPNFVMSPGDKDPGAGVLQNVTNPQLDGSGPANAVVTAYEVASDGHLISLGTATSDGTGNFAITPNTPLADGTHDIVFQAQKGDLTSPFSAPTSVVIDTKINTPTIGLPASSDSFGAGTVGTNHDDITNVTNPTLTGTAEAGATVYVSDGSGHTVSTIADSNGNYSVQAPGTLAEGNNVFTVQAVDKAGNTS…	3229	BPSL1661
BKP2_00834	VSPVAMGAVTTSGIKDAGL	BPSL1661	131	MNTKMLLIRAGKVTPTTLKTLAVAGVDSGDEIVFSSLPANSELKRDGADLVVRTPDETFVLKDAAAKLADESVVVRLGEQPLVVTQAPNENTHLPAGVQLAGLAAPGQNSAFGLQSFVSAAGEQSLQSDTVSPVAMGAVTTSGIKDAGLSDGGLMGNLRTDVRPTDEIPMYQQKLTQLPLDPRIDVPSRTDFGVNAARYEPAPAAVTAPNFVMSPGDKDPGAGVLQNVTNPQLDGSGPANAVVTAYEVASDGHLISLGTATSDGTGNFAITPNTPLADGTHDIVFQAQKGDLTSPFSAPTSVVIDTKINTPTIGLPASSDSFGAGTVGTNHDDITNVTNPTLTGTAEAGATVYVSDGSGHTVSTIADSNGNYSVQAPGTLAEGNNVFTVQAVDKAGNTS…	3229	BPSL1661
BKP2_00835	PVAMGAVTTSGIKDAGLSD	BPSL1661	133	MNTKMLLIRAGKVTPTTLKTLAVAGVDSGDEIVFSSLPANSELKRDGADLVVRTPDETFVLKDAAAKLADESVVVRLGEQPLVVTQAPNENTHLPAGVQLAGLAAPGQNSAFGLQSFVSAAGEQSLQSDTVSPVAMGAVTTSGIKDAGLSDGGLMGNLRTDVRPTDEIPMYQQKLTQLPLDPRIDVPSRTDFGVNAARYEPAPAAVTAPNFVMSPGDKDPGAGVLQNVTNPQLDGSGPANAVVTAYEVASDGHLISLGTATSDGTGNFAITPNTPLADGTHDIVFQAQKGDLTSPFSAPTSVVIDTKINTPTIGLPASSDSFGAGTVGTNHDDITNVTNPTLTGTAEAGATVYVSDGSGHTVSTIADSNGNYSVQAPGTLAEGNNVFTVQAVDKAGNTS…	3229	BPSL1661
BKP2_00836	AMGAVTTSGIKDAGLSDGG	BPSL1661	135	MNTKMLLIRAGKVTPTTLKTLAVAGVDSGDEIVFSSLPANSELKRDGADLVVRTPDETFVLKDAAAKLADESVVVRLGEQPLVVTQAPNENTHLPAGVQLAGLAAPGQNSAFGLQSFVSAAGEQSLQSDTVSPVAMGAVTTSGIKDAGLSDGGLMGNLRTDVRPTDEIPMYQQKLTQLPLDPRIDVPSRTDFGVNAARYEPAPAAVTAPNFVMSPGDKDPGAGVLQNVTNPQLDGSGPANAVVTAYEVASDGHLISLGTATSDGTGNFAITPNTPLADGTHDIVFQAQKGDLTSPFSAPTSVVIDTKINTPTIGLPASSDSFGAGTVGTNHDDITNVTNPTLTGTAEAGATVYVSDGSGHTVSTIADSNGNYSVQAPGTLAEGNNVFTVQAVDKAGNTS…	3229	BPSL1661
BKP2_00837	GAVTTSGIKDAGLSDGGLM	BPSL1661	137	MNTKMLLIRAGKVTPTTLKTLAVAGVDSGDEIVFSSLPANSELKRDGADLVVRTPDETFVLKDAAAKLADESVVVRLGEQPLVVTQAPNENTHLPAGVQLAGLAAPGQNSAFGLQSFVSAAGEQSLQSDTVSPVAMGAVTTSGIKDAGLSDGGLMGNLRTDVRPTDEIPMYQQKLTQLPLDPRIDVPSRTDFGVNAARYEPAPAAVTAPNFVMSPGDKDPGAGVLQNVTNPQLDGSGPANAVVTAYEVASDGHLISLGTATSDGTGNFAITPNTPLADGTHDIVFQAQKGDLTSPFSAPTSVVIDTKINTPTIGLPASSDSFGAGTVGTNHDDITNVTNPTLTGTAEAGATVYVSDGSGHTVSTIADSNGNYSVQAPGTLAEGNNVFTVQAVDKAGNTS…	3229	BPSL1661
BKP2_00838	VTTSGIKDAGLSDGGLMGN	BPSL1661	139	MNTKMLLIRAGKVTPTTLKTLAVAGVDSGDEIVFSSLPANSELKRDGADLVVRTPDETFVLKDAAAKLADESVVVRLGEQPLVVTQAPNENTHLPAGVQLAGLAAPGQNSAFGLQSFVSAAGEQSLQSDTVSPVAMGAVTTSGIKDAGLSDGGLMGNLRTDVRPTDEIPMYQQKLTQLPLDPRIDVPSRTDFGVNAARYEPAPAAVTAPNFVMSPGDKDPGAGVLQNVTNPQLDGSGPANAVVTAYEVASDGHLISLGTATSDGTGNFAITPNTPLADGTHDIVFQAQKGDLTSPFSAPTSVVIDTKINTPTIGLPASSDSFGAGTVGTNHDDITNVTNPTLTGTAEAGATVYVSDGSGHTVSTIADSNGNYSVQAPGTLAEGNNVFTVQAVDKAGNTS…	3229	BPSL1661
BKP2_00839	TSGIKDAGLSDGGLMGNLR	BPSL1661	141	MNTKMLLIRAGKVTPTTLKTLAVAGVDSGDEIVFSSLPANSELKRDGADLVVRTPDETFVLKDAAAKLADESVVVRLGEQPLVVTQAPNENTHLPAGVQLAGLAAPGQNSAFGLQSFVSAAGEQSLQSDTVSPVAMGAVTTSGIKDAGLSDGGLMGNLRTDVRPTDEIPMYQQKLTQLPLDPRIDVPSRTDFGVNAARYEPAPAAVTAPNFVMSPGDKDPGAGVLQNVTNPQLDGSGPANAVVTAYEVASDGHLISLGTATSDGTGNFAITPNTPLADGTHDIVFQAQKGDLTSPFSAPTSVVIDTKINTPTIGLPASSDSFGAGTVGTNHDDITNVTNPTLTGTAEAGATVYVSDGSGHTVSTIADSNGNYSVQAPGTLAEGNNVFTVQAVDKAGNTS…	3229	BPSL1661
BKP2_00840	GIKDAGLSDGGLMGNLRTD	BPSL1661	143	MNTKMLLIRAGKVTPTTLKTLAVAGVDSGDEIVFSSLPANSELKRDGADLVVRTPDETFVLKDAAAKLADESVVVRLGEQPLVVTQAPNENTHLPAGVQLAGLAAPGQNSAFGLQSFVSAAGEQSLQSDTVSPVAMGAVTTSGIKDAGLSDGGLMGNLRTDVRPTDEIPMYQQKLTQLPLDPRIDVPSRTDFGVNAARYEPAPAAVTAPNFVMSPGDKDPGAGVLQNVTNPQLDGSGPANAVVTAYEVASDGHLISLGTATSDGTGNFAITPNTPLADGTHDIVFQAQKGDLTSPFSAPTSVVIDTKINTPTIGLPASSDSFGAGTVGTNHDDITNVTNPTLTGTAEAGATVYVSDGSGHTVSTIADSNGNYSVQAPGTLAEGNNVFTVQAVDKAGNTS…	3229	BPSL1661
BKP2_00841	KDAGLSDGGLMGNLRTDVR	BPSL1661	145	MNTKMLLIRAGKVTPTTLKTLAVAGVDSGDEIVFSSLPANSELKRDGADLVVRTPDETFVLKDAAAKLADESVVVRLGEQPLVVTQAPNENTHLPAGVQLAGLAAPGQNSAFGLQSFVSAAGEQSLQSDTVSPVAMGAVTTSGIKDAGLSDGGLMGNLRTDVRPTDEIPMYQQKLTQLPLDPRIDVPSRTDFGVNAARYEPAPAAVTAPNFVMSPGDKDPGAGVLQNVTNPQLDGSGPANAVVTAYEVASDGHLISLGTATSDGTGNFAITPNTPLADGTHDIVFQAQKGDLTSPFSAPTSVVIDTKINTPTIGLPASSDSFGAGTVGTNHDDITNVTNPTLTGTAEAGATVYVSDGSGHTVSTIADSNGNYSVQAPGTLAEGNNVFTVQAVDKAGNTS…	3229	BPSL1661
BKP2_00842	AGLSDGGLMGNLRTDVRPT	BPSL1661	147	MNTKMLLIRAGKVTPTTLKTLAVAGVDSGDEIVFSSLPANSELKRDGADLVVRTPDETFVLKDAAAKLADESVVVRLGEQPLVVTQAPNENTHLPAGVQLAGLAAPGQNSAFGLQSFVSAAGEQSLQSDTVSPVAMGAVTTSGIKDAGLSDGGLMGNLRTDVRPTDEIPMYQQKLTQLPLDPRIDVPSRTDFGVNAARYEPAPAAVTAPNFVMSPGDKDPGAGVLQNVTNPQLDGSGPANAVVTAYEVASDGHLISLGTATSDGTGNFAITPNTPLADGTHDIVFQAQKGDLTSPFSAPTSVVIDTKINTPTIGLPASSDSFGAGTVGTNHDDITNVTNPTLTGTAEAGATVYVSDGSGHTVSTIADSNGNYSVQAPGTLAEGNNVFTVQAVDKAGNTS…	3229	BPSL1661
BKP2_00843	LSDGGLMGNLRTDVRPTDE	BPSL1661	149	MNTKMLLIRAGKVTPTTLKTLAVAGVDSGDEIVFSSLPANSELKRDGADLVVRTPDETFVLKDAAAKLADESVVVRLGEQPLVVTQAPNENTHLPAGVQLAGLAAPGQNSAFGLQSFVSAAGEQSLQSDTVSPVAMGAVTTSGIKDAGLSDGGLMGNLRTDVRPTDEIPMYQQKLTQLPLDPRIDVPSRTDFGVNAARYEPAPAAVTAPNFVMSPGDKDPGAGVLQNVTNPQLDGSGPANAVVTAYEVASDGHLISLGTATSDGTGNFAITPNTPLADGTHDIVFQAQKGDLTSPFSAPTSVVIDTKINTPTIGLPASSDSFGAGTVGTNHDDITNVTNPTLTGTAEAGATVYVSDGSGHTVSTIADSNGNYSVQAPGTLAEGNNVFTVQAVDKAGNTS…	3229	BPSL1661
BKP2_00844	DGGLMGNLRTDVRPTDEIP	BPSL1661	151	MNTKMLLIRAGKVTPTTLKTLAVAGVDSGDEIVFSSLPANSELKRDGADLVVRTPDETFVLKDAAAKLADESVVVRLGEQPLVVTQAPNENTHLPAGVQLAGLAAPGQNSAFGLQSFVSAAGEQSLQSDTVSPVAMGAVTTSGIKDAGLSDGGLMGNLRTDVRPTDEIPMYQQKLTQLPLDPRIDVPSRTDFGVNAARYEPAPAAVTAPNFVMSPGDKDPGAGVLQNVTNPQLDGSGPANAVVTAYEVASDGHLISLGTATSDGTGNFAITPNTPLADGTHDIVFQAQKGDLTSPFSAPTSVVIDTKINTPTIGLPASSDSFGAGTVGTNHDDITNVTNPTLTGTAEAGATVYVSDGSGHTVSTIADSNGNYSVQAPGTLAEGNNVFTVQAVDKAGNTS…	3229	BPSL1661
BKP2_00845	GLMGNLRTDVRPTDEIPMY	BPSL1661	153	MNTKMLLIRAGKVTPTTLKTLAVAGVDSGDEIVFSSLPANSELKRDGADLVVRTPDETFVLKDAAAKLADESVVVRLGEQPLVVTQAPNENTHLPAGVQLAGLAAPGQNSAFGLQSFVSAAGEQSLQSDTVSPVAMGAVTTSGIKDAGLSDGGLMGNLRTDVRPTDEIPMYQQKLTQLPLDPRIDVPSRTDFGVNAARYEPAPAAVTAPNFVMSPGDKDPGAGVLQNVTNPQLDGSGPANAVVTAYEVASDGHLISLGTATSDGTGNFAITPNTPLADGTHDIVFQAQKGDLTSPFSAPTSVVIDTKINTPTIGLPASSDSFGAGTVGTNHDDITNVTNPTLTGTAEAGATVYVSDGSGHTVSTIADSNGNYSVQAPGTLAEGNNVFTVQAVDKAGNTS…	3229	BPSL1661
BKP2_00846	MGNLRTDVRPTDEIPMYQQ	BPSL1661	155	MNTKMLLIRAGKVTPTTLKTLAVAGVDSGDEIVFSSLPANSELKRDGADLVVRTPDETFVLKDAAAKLADESVVVRLGEQPLVVTQAPNENTHLPAGVQLAGLAAPGQNSAFGLQSFVSAAGEQSLQSDTVSPVAMGAVTTSGIKDAGLSDGGLMGNLRTDVRPTDEIPMYQQKLTQLPLDPRIDVPSRTDFGVNAARYEPAPAAVTAPNFVMSPGDKDPGAGVLQNVTNPQLDGSGPANAVVTAYEVASDGHLISLGTATSDGTGNFAITPNTPLADGTHDIVFQAQKGDLTSPFSAPTSVVIDTKINTPTIGLPASSDSFGAGTVGTNHDDITNVTNPTLTGTAEAGATVYVSDGSGHTVSTIADSNGNYSVQAPGTLAEGNNVFTVQAVDKAGNTS…	3229	BPSL1661
BKP2_00847	NLRTDVRPTDEIPMYQQKL	BPSL1661	157	MNTKMLLIRAGKVTPTTLKTLAVAGVDSGDEIVFSSLPANSELKRDGADLVVRTPDETFVLKDAAAKLADESVVVRLGEQPLVVTQAPNENTHLPAGVQLAGLAAPGQNSAFGLQSFVSAAGEQSLQSDTVSPVAMGAVTTSGIKDAGLSDGGLMGNLRTDVRPTDEIPMYQQKLTQLPLDPRIDVPSRTDFGVNAARYEPAPAAVTAPNFVMSPGDKDPGAGVLQNVTNPQLDGSGPANAVVTAYEVASDGHLISLGTATSDGTGNFAITPNTPLADGTHDIVFQAQKGDLTSPFSAPTSVVIDTKINTPTIGLPASSDSFGAGTVGTNHDDITNVTNPTLTGTAEAGATVYVSDGSGHTVSTIADSNGNYSVQAPGTLAEGNNVFTVQAVDKAGNTS…	3229	BPSL1661
BKP2_00848	RTDVRPTDEIPMYQQKLTQ	BPSL1661	159	MNTKMLLIRAGKVTPTTLKTLAVAGVDSGDEIVFSSLPANSELKRDGADLVVRTPDETFVLKDAAAKLADESVVVRLGEQPLVVTQAPNENTHLPAGVQLAGLAAPGQNSAFGLQSFVSAAGEQSLQSDTVSPVAMGAVTTSGIKDAGLSDGGLMGNLRTDVRPTDEIPMYQQKLTQLPLDPRIDVPSRTDFGVNAARYEPAPAAVTAPNFVMSPGDKDPGAGVLQNVTNPQLDGSGPANAVVTAYEVASDGHLISLGTATSDGTGNFAITPNTPLADGTHDIVFQAQKGDLTSPFSAPTSVVIDTKINTPTIGLPASSDSFGAGTVGTNHDDITNVTNPTLTGTAEAGATVYVSDGSGHTVSTIADSNGNYSVQAPGTLAEGNNVFTVQAVDKAGNTS…	3229	BPSL1661
BKP2_00849	DVRPTDEIPMYQQKLTQLP	BPSL1661	161	MNTKMLLIRAGKVTPTTLKTLAVAGVDSGDEIVFSSLPANSELKRDGADLVVRTPDETFVLKDAAAKLADESVVVRLGEQPLVVTQAPNENTHLPAGVQLAGLAAPGQNSAFGLQSFVSAAGEQSLQSDTVSPVAMGAVTTSGIKDAGLSDGGLMGNLRTDVRPTDEIPMYQQKLTQLPLDPRIDVPSRTDFGVNAARYEPAPAAVTAPNFVMSPGDKDPGAGVLQNVTNPQLDGSGPANAVVTAYEVASDGHLISLGTATSDGTGNFAITPNTPLADGTHDIVFQAQKGDLTSPFSAPTSVVIDTKINTPTIGLPASSDSFGAGTVGTNHDDITNVTNPTLTGTAEAGATVYVSDGSGHTVSTIADSNGNYSVQAPGTLAEGNNVFTVQAVDKAGNTS…	3229	BPSL1661
BKP2_00850	RPTDEIPMYQQKLTQLPLD	BPSL1661	163	MNTKMLLIRAGKVTPTTLKTLAVAGVDSGDEIVFSSLPANSELKRDGADLVVRTPDETFVLKDAAAKLADESVVVRLGEQPLVVTQAPNENTHLPAGVQLAGLAAPGQNSAFGLQSFVSAAGEQSLQSDTVSPVAMGAVTTSGIKDAGLSDGGLMGNLRTDVRPTDEIPMYQQKLTQLPLDPRIDVPSRTDFGVNAARYEPAPAAVTAPNFVMSPGDKDPGAGVLQNVTNPQLDGSGPANAVVTAYEVASDGHLISLGTATSDGTGNFAITPNTPLADGTHDIVFQAQKGDLTSPFSAPTSVVIDTKINTPTIGLPASSDSFGAGTVGTNHDDITNVTNPTLTGTAEAGATVYVSDGSGHTVSTIADSNGNYSVQAPGTLAEGNNVFTVQAVDKAGNTS…	3229	BPSL1661
BKP2_00851	TDEIPMYQQKLTQLPLDPR	BPSL1661	165	MNTKMLLIRAGKVTPTTLKTLAVAGVDSGDEIVFSSLPANSELKRDGADLVVRTPDETFVLKDAAAKLADESVVVRLGEQPLVVTQAPNENTHLPAGVQLAGLAAPGQNSAFGLQSFVSAAGEQSLQSDTVSPVAMGAVTTSGIKDAGLSDGGLMGNLRTDVRPTDEIPMYQQKLTQLPLDPRIDVPSRTDFGVNAARYEPAPAAVTAPNFVMSPGDKDPGAGVLQNVTNPQLDGSGPANAVVTAYEVASDGHLISLGTATSDGTGNFAITPNTPLADGTHDIVFQAQKGDLTSPFSAPTSVVIDTKINTPTIGLPASSDSFGAGTVGTNHDDITNVTNPTLTGTAEAGATVYVSDGSGHTVSTIADSNGNYSVQAPGTLAEGNNVFTVQAVDKAGNTS…	3229	BPSL1661
BKP2_00852	EIPMYQQKLTQLPLDPRID	BPSL1661	167	MNTKMLLIRAGKVTPTTLKTLAVAGVDSGDEIVFSSLPANSELKRDGADLVVRTPDETFVLKDAAAKLADESVVVRLGEQPLVVTQAPNENTHLPAGVQLAGLAAPGQNSAFGLQSFVSAAGEQSLQSDTVSPVAMGAVTTSGIKDAGLSDGGLMGNLRTDVRPTDEIPMYQQKLTQLPLDPRIDVPSRTDFGVNAARYEPAPAAVTAPNFVMSPGDKDPGAGVLQNVTNPQLDGSGPANAVVTAYEVASDGHLISLGTATSDGTGNFAITPNTPLADGTHDIVFQAQKGDLTSPFSAPTSVVIDTKINTPTIGLPASSDSFGAGTVGTNHDDITNVTNPTLTGTAEAGATVYVSDGSGHTVSTIADSNGNYSVQAPGTLAEGNNVFTVQAVDKAGNTS…	3229	BPSL1661
BKP2_00853	PMYQQKLTQLPLDPRIDVP	BPSL1661	169	MNTKMLLIRAGKVTPTTLKTLAVAGVDSGDEIVFSSLPANSELKRDGADLVVRTPDETFVLKDAAAKLADESVVVRLGEQPLVVTQAPNENTHLPAGVQLAGLAAPGQNSAFGLQSFVSAAGEQSLQSDTVSPVAMGAVTTSGIKDAGLSDGGLMGNLRTDVRPTDEIPMYQQKLTQLPLDPRIDVPSRTDFGVNAARYEPAPAAVTAPNFVMSPGDKDPGAGVLQNVTNPQLDGSGPANAVVTAYEVASDGHLISLGTATSDGTGNFAITPNTPLADGTHDIVFQAQKGDLTSPFSAPTSVVIDTKINTPTIGLPASSDSFGAGTVGTNHDDITNVTNPTLTGTAEAGATVYVSDGSGHTVSTIADSNGNYSVQAPGTLAEGNNVFTVQAVDKAGNTS…	3229	BPSL1661
BKP2_00854	YQQKLTQLPLDPRIDVPSR	BPSL1661	171	MNTKMLLIRAGKVTPTTLKTLAVAGVDSGDEIVFSSLPANSELKRDGADLVVRTPDETFVLKDAAAKLADESVVVRLGEQPLVVTQAPNENTHLPAGVQLAGLAAPGQNSAFGLQSFVSAAGEQSLQSDTVSPVAMGAVTTSGIKDAGLSDGGLMGNLRTDVRPTDEIPMYQQKLTQLPLDPRIDVPSRTDFGVNAARYEPAPAAVTAPNFVMSPGDKDPGAGVLQNVTNPQLDGSGPANAVVTAYEVASDGHLISLGTATSDGTGNFAITPNTPLADGTHDIVFQAQKGDLTSPFSAPTSVVIDTKINTPTIGLPASSDSFGAGTVGTNHDDITNVTNPTLTGTAEAGATVYVSDGSGHTVSTIADSNGNYSVQAPGTLAEGNNVFTVQAVDKAGNTS…	3229	BPSL1661
BKP2_00855	QKLTQLPLDPRIDVPSRTD	BPSL1661	173	MNTKMLLIRAGKVTPTTLKTLAVAGVDSGDEIVFSSLPANSELKRDGADLVVRTPDETFVLKDAAAKLADESVVVRLGEQPLVVTQAPNENTHLPAGVQLAGLAAPGQNSAFGLQSFVSAAGEQSLQSDTVSPVAMGAVTTSGIKDAGLSDGGLMGNLRTDVRPTDEIPMYQQKLTQLPLDPRIDVPSRTDFGVNAARYEPAPAAVTAPNFVMSPGDKDPGAGVLQNVTNPQLDGSGPANAVVTAYEVASDGHLISLGTATSDGTGNFAITPNTPLADGTHDIVFQAQKGDLTSPFSAPTSVVIDTKINTPTIGLPASSDSFGAGTVGTNHDDITNVTNPTLTGTAEAGATVYVSDGSGHTVSTIADSNGNYSVQAPGTLAEGNNVFTVQAVDKAGNTS…	3229	BPSL1661
BKP2_00856	LTQLPLDPRIDVPSRTDFG	BPSL1661	175	MNTKMLLIRAGKVTPTTLKTLAVAGVDSGDEIVFSSLPANSELKRDGADLVVRTPDETFVLKDAAAKLADESVVVRLGEQPLVVTQAPNENTHLPAGVQLAGLAAPGQNSAFGLQSFVSAAGEQSLQSDTVSPVAMGAVTTSGIKDAGLSDGGLMGNLRTDVRPTDEIPMYQQKLTQLPLDPRIDVPSRTDFGVNAARYEPAPAAVTAPNFVMSPGDKDPGAGVLQNVTNPQLDGSGPANAVVTAYEVASDGHLISLGTATSDGTGNFAITPNTPLADGTHDIVFQAQKGDLTSPFSAPTSVVIDTKINTPTIGLPASSDSFGAGTVGTNHDDITNVTNPTLTGTAEAGATVYVSDGSGHTVSTIADSNGNYSVQAPGTLAEGNNVFTVQAVDKAGNTS…	3229	BPSL1661
BKP2_00857	QLPLDPRIDVPSRTDFGVN	BPSL1661	177	MNTKMLLIRAGKVTPTTLKTLAVAGVDSGDEIVFSSLPANSELKRDGADLVVRTPDETFVLKDAAAKLADESVVVRLGEQPLVVTQAPNENTHLPAGVQLAGLAAPGQNSAFGLQSFVSAAGEQSLQSDTVSPVAMGAVTTSGIKDAGLSDGGLMGNLRTDVRPTDEIPMYQQKLTQLPLDPRIDVPSRTDFGVNAARYEPAPAAVTAPNFVMSPGDKDPGAGVLQNVTNPQLDGSGPANAVVTAYEVASDGHLISLGTATSDGTGNFAITPNTPLADGTHDIVFQAQKGDLTSPFSAPTSVVIDTKINTPTIGLPASSDSFGAGTVGTNHDDITNVTNPTLTGTAEAGATVYVSDGSGHTVSTIADSNGNYSVQAPGTLAEGNNVFTVQAVDKAGNTS…	3229	BPSL1661
BKP2_00858	PLDPRIDVPSRTDFGVNAA	BPSL1661	179	MNTKMLLIRAGKVTPTTLKTLAVAGVDSGDEIVFSSLPANSELKRDGADLVVRTPDETFVLKDAAAKLADESVVVRLGEQPLVVTQAPNENTHLPAGVQLAGLAAPGQNSAFGLQSFVSAAGEQSLQSDTVSPVAMGAVTTSGIKDAGLSDGGLMGNLRTDVRPTDEIPMYQQKLTQLPLDPRIDVPSRTDFGVNAARYEPAPAAVTAPNFVMSPGDKDPGAGVLQNVTNPQLDGSGPANAVVTAYEVASDGHLISLGTATSDGTGNFAITPNTPLADGTHDIVFQAQKGDLTSPFSAPTSVVIDTKINTPTIGLPASSDSFGAGTVGTNHDDITNVTNPTLTGTAEAGATVYVSDGSGHTVSTIADSNGNYSVQAPGTLAEGNNVFTVQAVDKAGNTS…	3229	BPSL1661
BKP2_00859	DPRIDVPSRTDFGVNAARY	BPSL1661	181	MNTKMLLIRAGKVTPTTLKTLAVAGVDSGDEIVFSSLPANSELKRDGADLVVRTPDETFVLKDAAAKLADESVVVRLGEQPLVVTQAPNENTHLPAGVQLAGLAAPGQNSAFGLQSFVSAAGEQSLQSDTVSPVAMGAVTTSGIKDAGLSDGGLMGNLRTDVRPTDEIPMYQQKLTQLPLDPRIDVPSRTDFGVNAARYEPAPAAVTAPNFVMSPGDKDPGAGVLQNVTNPQLDGSGPANAVVTAYEVASDGHLISLGTATSDGTGNFAITPNTPLADGTHDIVFQAQKGDLTSPFSAPTSVVIDTKINTPTIGLPASSDSFGAGTVGTNHDDITNVTNPTLTGTAEAGATVYVSDGSGHTVSTIADSNGNYSVQAPGTLAEGNNVFTVQAVDKAGNTS…	3229	BPSL1661
BKP2_00860	RIDVPSRTDFGVNAARYEP	BPSL1661	183	MNTKMLLIRAGKVTPTTLKTLAVAGVDSGDEIVFSSLPANSELKRDGADLVVRTPDETFVLKDAAAKLADESVVVRLGEQPLVVTQAPNENTHLPAGVQLAGLAAPGQNSAFGLQSFVSAAGEQSLQSDTVSPVAMGAVTTSGIKDAGLSDGGLMGNLRTDVRPTDEIPMYQQKLTQLPLDPRIDVPSRTDFGVNAARYEPAPAAVTAPNFVMSPGDKDPGAGVLQNVTNPQLDGSGPANAVVTAYEVASDGHLISLGTATSDGTGNFAITPNTPLADGTHDIVFQAQKGDLTSPFSAPTSVVIDTKINTPTIGLPASSDSFGAGTVGTNHDDITNVTNPTLTGTAEAGATVYVSDGSGHTVSTIADSNGNYSVQAPGTLAEGNNVFTVQAVDKAGNTS…	3229	BPSL1661
BKP2_00861	DVPSRTDFGVNAARYEPAP	BPSL1661	185	MNTKMLLIRAGKVTPTTLKTLAVAGVDSGDEIVFSSLPANSELKRDGADLVVRTPDETFVLKDAAAKLADESVVVRLGEQPLVVTQAPNENTHLPAGVQLAGLAAPGQNSAFGLQSFVSAAGEQSLQSDTVSPVAMGAVTTSGIKDAGLSDGGLMGNLRTDVRPTDEIPMYQQKLTQLPLDPRIDVPSRTDFGVNAARYEPAPAAVTAPNFVMSPGDKDPGAGVLQNVTNPQLDGSGPANAVVTAYEVASDGHLISLGTATSDGTGNFAITPNTPLADGTHDIVFQAQKGDLTSPFSAPTSVVIDTKINTPTIGLPASSDSFGAGTVGTNHDDITNVTNPTLTGTAEAGATVYVSDGSGHTVSTIADSNGNYSVQAPGTLAEGNNVFTVQAVDKAGNTS…	3229	BPSL1661
BKP2_00862	PSRTDFGVNAARYEPAPAA	BPSL1661	187	MNTKMLLIRAGKVTPTTLKTLAVAGVDSGDEIVFSSLPANSELKRDGADLVVRTPDETFVLKDAAAKLADESVVVRLGEQPLVVTQAPNENTHLPAGVQLAGLAAPGQNSAFGLQSFVSAAGEQSLQSDTVSPVAMGAVTTSGIKDAGLSDGGLMGNLRTDVRPTDEIPMYQQKLTQLPLDPRIDVPSRTDFGVNAARYEPAPAAVTAPNFVMSPGDKDPGAGVLQNVTNPQLDGSGPANAVVTAYEVASDGHLISLGTATSDGTGNFAITPNTPLADGTHDIVFQAQKGDLTSPFSAPTSVVIDTKINTPTIGLPASSDSFGAGTVGTNHDDITNVTNPTLTGTAEAGATVYVSDGSGHTVSTIADSNGNYSVQAPGTLAEGNNVFTVQAVDKAGNTS…	3229	BPSL1661
BKP2_00863	RTDFGVNAARYEPAPAAVT	BPSL1661	189	MNTKMLLIRAGKVTPTTLKTLAVAGVDSGDEIVFSSLPANSELKRDGADLVVRTPDETFVLKDAAAKLADESVVVRLGEQPLVVTQAPNENTHLPAGVQLAGLAAPGQNSAFGLQSFVSAAGEQSLQSDTVSPVAMGAVTTSGIKDAGLSDGGLMGNLRTDVRPTDEIPMYQQKLTQLPLDPRIDVPSRTDFGVNAARYEPAPAAVTAPNFVMSPGDKDPGAGVLQNVTNPQLDGSGPANAVVTAYEVASDGHLISLGTATSDGTGNFAITPNTPLADGTHDIVFQAQKGDLTSPFSAPTSVVIDTKINTPTIGLPASSDSFGAGTVGTNHDDITNVTNPTLTGTAEAGATVYVSDGSGHTVSTIADSNGNYSVQAPGTLAEGNNVFTVQAVDKAGNTS…	3229	BPSL1661
BKP2_00864	DFGVNAARYEPAPAAVTAP	BPSL1661	191	MNTKMLLIRAGKVTPTTLKTLAVAGVDSGDEIVFSSLPANSELKRDGADLVVRTPDETFVLKDAAAKLADESVVVRLGEQPLVVTQAPNENTHLPAGVQLAGLAAPGQNSAFGLQSFVSAAGEQSLQSDTVSPVAMGAVTTSGIKDAGLSDGGLMGNLRTDVRPTDEIPMYQQKLTQLPLDPRIDVPSRTDFGVNAARYEPAPAAVTAPNFVMSPGDKDPGAGVLQNVTNPQLDGSGPANAVVTAYEVASDGHLISLGTATSDGTGNFAITPNTPLADGTHDIVFQAQKGDLTSPFSAPTSVVIDTKINTPTIGLPASSDSFGAGTVGTNHDDITNVTNPTLTGTAEAGATVYVSDGSGHTVSTIADSNGNYSVQAPGTLAEGNNVFTVQAVDKAGNTS…	3229	BPSL1661
BKP2_00865	GVNAARYEPAPAAVTAPNF	BPSL1661	193	MNTKMLLIRAGKVTPTTLKTLAVAGVDSGDEIVFSSLPANSELKRDGADLVVRTPDETFVLKDAAAKLADESVVVRLGEQPLVVTQAPNENTHLPAGVQLAGLAAPGQNSAFGLQSFVSAAGEQSLQSDTVSPVAMGAVTTSGIKDAGLSDGGLMGNLRTDVRPTDEIPMYQQKLTQLPLDPRIDVPSRTDFGVNAARYEPAPAAVTAPNFVMSPGDKDPGAGVLQNVTNPQLDGSGPANAVVTAYEVASDGHLISLGTATSDGTGNFAITPNTPLADGTHDIVFQAQKGDLTSPFSAPTSVVIDTKINTPTIGLPASSDSFGAGTVGTNHDDITNVTNPTLTGTAEAGATVYVSDGSGHTVSTIADSNGNYSVQAPGTLAEGNNVFTVQAVDKAGNTS…	3229	BPSL1661
BKP2_00866	NAARYEPAPAAVTAPNFVM	BPSL1661	195	MNTKMLLIRAGKVTPTTLKTLAVAGVDSGDEIVFSSLPANSELKRDGADLVVRTPDETFVLKDAAAKLADESVVVRLGEQPLVVTQAPNENTHLPAGVQLAGLAAPGQNSAFGLQSFVSAAGEQSLQSDTVSPVAMGAVTTSGIKDAGLSDGGLMGNLRTDVRPTDEIPMYQQKLTQLPLDPRIDVPSRTDFGVNAARYEPAPAAVTAPNFVMSPGDKDPGAGVLQNVTNPQLDGSGPANAVVTAYEVASDGHLISLGTATSDGTGNFAITPNTPLADGTHDIVFQAQKGDLTSPFSAPTSVVIDTKINTPTIGLPASSDSFGAGTVGTNHDDITNVTNPTLTGTAEAGATVYVSDGSGHTVSTIADSNGNYSVQAPGTLAEGNNVFTVQAVDKAGNTS…	3229	BPSL1661
BKP2_00867	ARYEPAPAAVTAPNFVMSP	BPSL1661	197	MNTKMLLIRAGKVTPTTLKTLAVAGVDSGDEIVFSSLPANSELKRDGADLVVRTPDETFVLKDAAAKLADESVVVRLGEQPLVVTQAPNENTHLPAGVQLAGLAAPGQNSAFGLQSFVSAAGEQSLQSDTVSPVAMGAVTTSGIKDAGLSDGGLMGNLRTDVRPTDEIPMYQQKLTQLPLDPRIDVPSRTDFGVNAARYEPAPAAVTAPNFVMSPGDKDPGAGVLQNVTNPQLDGSGPANAVVTAYEVASDGHLISLGTATSDGTGNFAITPNTPLADGTHDIVFQAQKGDLTSPFSAPTSVVIDTKINTPTIGLPASSDSFGAGTVGTNHDDITNVTNPTLTGTAEAGATVYVSDGSGHTVSTIADSNGNYSVQAPGTLAEGNNVFTVQAVDKAGNTS…	3229	BPSL1661
BKP2_00868	YEPAPAAVTAPNFVMSPGD	BPSL1661	199	MNTKMLLIRAGKVTPTTLKTLAVAGVDSGDEIVFSSLPANSELKRDGADLVVRTPDETFVLKDAAAKLADESVVVRLGEQPLVVTQAPNENTHLPAGVQLAGLAAPGQNSAFGLQSFVSAAGEQSLQSDTVSPVAMGAVTTSGIKDAGLSDGGLMGNLRTDVRPTDEIPMYQQKLTQLPLDPRIDVPSRTDFGVNAARYEPAPAAVTAPNFVMSPGDKDPGAGVLQNVTNPQLDGSGPANAVVTAYEVASDGHLISLGTATSDGTGNFAITPNTPLADGTHDIVFQAQKGDLTSPFSAPTSVVIDTKINTPTIGLPASSDSFGAGTVGTNHDDITNVTNPTLTGTAEAGATVYVSDGSGHTVSTIADSNGNYSVQAPGTLAEGNNVFTVQAVDKAGNTS…	3229	BPSL1661
BKP2_00869	PAPAAVTAPNFVMSPGDKD	BPSL1661	201	MNTKMLLIRAGKVTPTTLKTLAVAGVDSGDEIVFSSLPANSELKRDGADLVVRTPDETFVLKDAAAKLADESVVVRLGEQPLVVTQAPNENTHLPAGVQLAGLAAPGQNSAFGLQSFVSAAGEQSLQSDTVSPVAMGAVTTSGIKDAGLSDGGLMGNLRTDVRPTDEIPMYQQKLTQLPLDPRIDVPSRTDFGVNAARYEPAPAAVTAPNFVMSPGDKDPGAGVLQNVTNPQLDGSGPANAVVTAYEVASDGHLISLGTATSDGTGNFAITPNTPLADGTHDIVFQAQKGDLTSPFSAPTSVVIDTKINTPTIGLPASSDSFGAGTVGTNHDDITNVTNPTLTGTAEAGATVYVSDGSGHTVSTIADSNGNYSVQAPGTLAEGNNVFTVQAVDKAGNTS…	3229	BPSL1661
BKP2_00870	PAAVTAPNFVMSPGDKDPG	BPSL1661	203	MNTKMLLIRAGKVTPTTLKTLAVAGVDSGDEIVFSSLPANSELKRDGADLVVRTPDETFVLKDAAAKLADESVVVRLGEQPLVVTQAPNENTHLPAGVQLAGLAAPGQNSAFGLQSFVSAAGEQSLQSDTVSPVAMGAVTTSGIKDAGLSDGGLMGNLRTDVRPTDEIPMYQQKLTQLPLDPRIDVPSRTDFGVNAARYEPAPAAVTAPNFVMSPGDKDPGAGVLQNVTNPQLDGSGPANAVVTAYEVASDGHLISLGTATSDGTGNFAITPNTPLADGTHDIVFQAQKGDLTSPFSAPTSVVIDTKINTPTIGLPASSDSFGAGTVGTNHDDITNVTNPTLTGTAEAGATVYVSDGSGHTVSTIADSNGNYSVQAPGTLAEGNNVFTVQAVDKAGNTS…	3229	BPSL1661
BKP2_00871	AVTAPNFVMSPGDKDPGAG	BPSL1661	205	MNTKMLLIRAGKVTPTTLKTLAVAGVDSGDEIVFSSLPANSELKRDGADLVVRTPDETFVLKDAAAKLADESVVVRLGEQPLVVTQAPNENTHLPAGVQLAGLAAPGQNSAFGLQSFVSAAGEQSLQSDTVSPVAMGAVTTSGIKDAGLSDGGLMGNLRTDVRPTDEIPMYQQKLTQLPLDPRIDVPSRTDFGVNAARYEPAPAAVTAPNFVMSPGDKDPGAGVLQNVTNPQLDGSGPANAVVTAYEVASDGHLISLGTATSDGTGNFAITPNTPLADGTHDIVFQAQKGDLTSPFSAPTSVVIDTKINTPTIGLPASSDSFGAGTVGTNHDDITNVTNPTLTGTAEAGATVYVSDGSGHTVSTIADSNGNYSVQAPGTLAEGNNVFTVQAVDKAGNTS…	3229	BPSL1661
BKP2_00872	TAPNFVMSPGDKDPGAGVL	BPSL1661	207	MNTKMLLIRAGKVTPTTLKTLAVAGVDSGDEIVFSSLPANSELKRDGADLVVRTPDETFVLKDAAAKLADESVVVRLGEQPLVVTQAPNENTHLPAGVQLAGLAAPGQNSAFGLQSFVSAAGEQSLQSDTVSPVAMGAVTTSGIKDAGLSDGGLMGNLRTDVRPTDEIPMYQQKLTQLPLDPRIDVPSRTDFGVNAARYEPAPAAVTAPNFVMSPGDKDPGAGVLQNVTNPQLDGSGPANAVVTAYEVASDGHLISLGTATSDGTGNFAITPNTPLADGTHDIVFQAQKGDLTSPFSAPTSVVIDTKINTPTIGLPASSDSFGAGTVGTNHDDITNVTNPTLTGTAEAGATVYVSDGSGHTVSTIADSNGNYSVQAPGTLAEGNNVFTVQAVDKAGNTS…	3229	BPSL1661
BKP2_00873	PNFVMSPGDKDPGAGVLQN	BPSL1661	209	MNTKMLLIRAGKVTPTTLKTLAVAGVDSGDEIVFSSLPANSELKRDGADLVVRTPDETFVLKDAAAKLADESVVVRLGEQPLVVTQAPNENTHLPAGVQLAGLAAPGQNSAFGLQSFVSAAGEQSLQSDTVSPVAMGAVTTSGIKDAGLSDGGLMGNLRTDVRPTDEIPMYQQKLTQLPLDPRIDVPSRTDFGVNAARYEPAPAAVTAPNFVMSPGDKDPGAGVLQNVTNPQLDGSGPANAVVTAYEVASDGHLISLGTATSDGTGNFAITPNTPLADGTHDIVFQAQKGDLTSPFSAPTSVVIDTKINTPTIGLPASSDSFGAGTVGTNHDDITNVTNPTLTGTAEAGATVYVSDGSGHTVSTIADSNGNYSVQAPGTLAEGNNVFTVQAVDKAGNTS…	3229	BPSL1661
BKP2_00874	FVMSPGDKDPGAGVLQNVT	BPSL1661	211	MNTKMLLIRAGKVTPTTLKTLAVAGVDSGDEIVFSSLPANSELKRDGADLVVRTPDETFVLKDAAAKLADESVVVRLGEQPLVVTQAPNENTHLPAGVQLAGLAAPGQNSAFGLQSFVSAAGEQSLQSDTVSPVAMGAVTTSGIKDAGLSDGGLMGNLRTDVRPTDEIPMYQQKLTQLPLDPRIDVPSRTDFGVNAARYEPAPAAVTAPNFVMSPGDKDPGAGVLQNVTNPQLDGSGPANAVVTAYEVASDGHLISLGTATSDGTGNFAITPNTPLADGTHDIVFQAQKGDLTSPFSAPTSVVIDTKINTPTIGLPASSDSFGAGTVGTNHDDITNVTNPTLTGTAEAGATVYVSDGSGHTVSTIADSNGNYSVQAPGTLAEGNNVFTVQAVDKAGNTS…	3229	BPSL1661
BKP2_00875	MSPGDKDPGAGVLQNVTNP	BPSL1661	213	MNTKMLLIRAGKVTPTTLKTLAVAGVDSGDEIVFSSLPANSELKRDGADLVVRTPDETFVLKDAAAKLADESVVVRLGEQPLVVTQAPNENTHLPAGVQLAGLAAPGQNSAFGLQSFVSAAGEQSLQSDTVSPVAMGAVTTSGIKDAGLSDGGLMGNLRTDVRPTDEIPMYQQKLTQLPLDPRIDVPSRTDFGVNAARYEPAPAAVTAPNFVMSPGDKDPGAGVLQNVTNPQLDGSGPANAVVTAYEVASDGHLISLGTATSDGTGNFAITPNTPLADGTHDIVFQAQKGDLTSPFSAPTSVVIDTKINTPTIGLPASSDSFGAGTVGTNHDDITNVTNPTLTGTAEAGATVYVSDGSGHTVSTIADSNGNYSVQAPGTLAEGNNVFTVQAVDKAGNTS…	3229	BPSL1661
BKP2_00876	PGDKDPGAGVLQNVTNPQL	BPSL1661	215	MNTKMLLIRAGKVTPTTLKTLAVAGVDSGDEIVFSSLPANSELKRDGADLVVRTPDETFVLKDAAAKLADESVVVRLGEQPLVVTQAPNENTHLPAGVQLAGLAAPGQNSAFGLQSFVSAAGEQSLQSDTVSPVAMGAVTTSGIKDAGLSDGGLMGNLRTDVRPTDEIPMYQQKLTQLPLDPRIDVPSRTDFGVNAARYEPAPAAVTAPNFVMSPGDKDPGAGVLQNVTNPQLDGSGPANAVVTAYEVASDGHLISLGTATSDGTGNFAITPNTPLADGTHDIVFQAQKGDLTSPFSAPTSVVIDTKINTPTIGLPASSDSFGAGTVGTNHDDITNVTNPTLTGTAEAGATVYVSDGSGHTVSTIADSNGNYSVQAPGTLAEGNNVFTVQAVDKAGNTS…	3229	BPSL1661
BKP2_00877	DKDPGAGVLQNVTNPQLDG	BPSL1661	217	MNTKMLLIRAGKVTPTTLKTLAVAGVDSGDEIVFSSLPANSELKRDGADLVVRTPDETFVLKDAAAKLADESVVVRLGEQPLVVTQAPNENTHLPAGVQLAGLAAPGQNSAFGLQSFVSAAGEQSLQSDTVSPVAMGAVTTSGIKDAGLSDGGLMGNLRTDVRPTDEIPMYQQKLTQLPLDPRIDVPSRTDFGVNAARYEPAPAAVTAPNFVMSPGDKDPGAGVLQNVTNPQLDGSGPANAVVTAYEVASDGHLISLGTATSDGTGNFAITPNTPLADGTHDIVFQAQKGDLTSPFSAPTSVVIDTKINTPTIGLPASSDSFGAGTVGTNHDDITNVTNPTLTGTAEAGATVYVSDGSGHTVSTIADSNGNYSVQAPGTLAEGNNVFTVQAVDKAGNTS…	3229	BPSL1661
BKP2_00878	DPGAGVLQNVTNPQLDGSG	BPSL1661	219	MNTKMLLIRAGKVTPTTLKTLAVAGVDSGDEIVFSSLPANSELKRDGADLVVRTPDETFVLKDAAAKLADESVVVRLGEQPLVVTQAPNENTHLPAGVQLAGLAAPGQNSAFGLQSFVSAAGEQSLQSDTVSPVAMGAVTTSGIKDAGLSDGGLMGNLRTDVRPTDEIPMYQQKLTQLPLDPRIDVPSRTDFGVNAARYEPAPAAVTAPNFVMSPGDKDPGAGVLQNVTNPQLDGSGPANAVVTAYEVASDGHLISLGTATSDGTGNFAITPNTPLADGTHDIVFQAQKGDLTSPFSAPTSVVIDTKINTPTIGLPASSDSFGAGTVGTNHDDITNVTNPTLTGTAEAGATVYVSDGSGHTVSTIADSNGNYSVQAPGTLAEGNNVFTVQAVDKAGNTS…	3229	BPSL1661
BKP2_00879	GAGVLQNVTNPQLDGSGPA	BPSL1661	221	MNTKMLLIRAGKVTPTTLKTLAVAGVDSGDEIVFSSLPANSELKRDGADLVVRTPDETFVLKDAAAKLADESVVVRLGEQPLVVTQAPNENTHLPAGVQLAGLAAPGQNSAFGLQSFVSAAGEQSLQSDTVSPVAMGAVTTSGIKDAGLSDGGLMGNLRTDVRPTDEIPMYQQKLTQLPLDPRIDVPSRTDFGVNAARYEPAPAAVTAPNFVMSPGDKDPGAGVLQNVTNPQLDGSGPANAVVTAYEVASDGHLISLGTATSDGTGNFAITPNTPLADGTHDIVFQAQKGDLTSPFSAPTSVVIDTKINTPTIGLPASSDSFGAGTVGTNHDDITNVTNPTLTGTAEAGATVYVSDGSGHTVSTIADSNGNYSVQAPGTLAEGNNVFTVQAVDKAGNTS…	3229	BPSL1661
BKP2_00880	GVLQNVTNPQLDGSGPANA	BPSL1661	223	MNTKMLLIRAGKVTPTTLKTLAVAGVDSGDEIVFSSLPANSELKRDGADLVVRTPDETFVLKDAAAKLADESVVVRLGEQPLVVTQAPNENTHLPAGVQLAGLAAPGQNSAFGLQSFVSAAGEQSLQSDTVSPVAMGAVTTSGIKDAGLSDGGLMGNLRTDVRPTDEIPMYQQKLTQLPLDPRIDVPSRTDFGVNAARYEPAPAAVTAPNFVMSPGDKDPGAGVLQNVTNPQLDGSGPANAVVTAYEVASDGHLISLGTATSDGTGNFAITPNTPLADGTHDIVFQAQKGDLTSPFSAPTSVVIDTKINTPTIGLPASSDSFGAGTVGTNHDDITNVTNPTLTGTAEAGATVYVSDGSGHTVSTIADSNGNYSVQAPGTLAEGNNVFTVQAVDKAGNTS…	3229	BPSL1661
BKP2_00881	LQNVTNPQLDGSGPANAVV	BPSL1661	225	MNTKMLLIRAGKVTPTTLKTLAVAGVDSGDEIVFSSLPANSELKRDGADLVVRTPDETFVLKDAAAKLADESVVVRLGEQPLVVTQAPNENTHLPAGVQLAGLAAPGQNSAFGLQSFVSAAGEQSLQSDTVSPVAMGAVTTSGIKDAGLSDGGLMGNLRTDVRPTDEIPMYQQKLTQLPLDPRIDVPSRTDFGVNAARYEPAPAAVTAPNFVMSPGDKDPGAGVLQNVTNPQLDGSGPANAVVTAYEVASDGHLISLGTATSDGTGNFAITPNTPLADGTHDIVFQAQKGDLTSPFSAPTSVVIDTKINTPTIGLPASSDSFGAGTVGTNHDDITNVTNPTLTGTAEAGATVYVSDGSGHTVSTIADSNGNYSVQAPGTLAEGNNVFTVQAVDKAGNTS…	3229	BPSL1661
BKP2_00882	NVTNPQLDGSGPANAVVTA	BPSL1661	227	MNTKMLLIRAGKVTPTTLKTLAVAGVDSGDEIVFSSLPANSELKRDGADLVVRTPDETFVLKDAAAKLADESVVVRLGEQPLVVTQAPNENTHLPAGVQLAGLAAPGQNSAFGLQSFVSAAGEQSLQSDTVSPVAMGAVTTSGIKDAGLSDGGLMGNLRTDVRPTDEIPMYQQKLTQLPLDPRIDVPSRTDFGVNAARYEPAPAAVTAPNFVMSPGDKDPGAGVLQNVTNPQLDGSGPANAVVTAYEVASDGHLISLGTATSDGTGNFAITPNTPLADGTHDIVFQAQKGDLTSPFSAPTSVVIDTKINTPTIGLPASSDSFGAGTVGTNHDDITNVTNPTLTGTAEAGATVYVSDGSGHTVSTIADSNGNYSVQAPGTLAEGNNVFTVQAVDKAGNTS…	3229	BPSL1661
BKP2_00883	TNPQLDGSGPANAVVTAYE	BPSL1661	229	MNTKMLLIRAGKVTPTTLKTLAVAGVDSGDEIVFSSLPANSELKRDGADLVVRTPDETFVLKDAAAKLADESVVVRLGEQPLVVTQAPNENTHLPAGVQLAGLAAPGQNSAFGLQSFVSAAGEQSLQSDTVSPVAMGAVTTSGIKDAGLSDGGLMGNLRTDVRPTDEIPMYQQKLTQLPLDPRIDVPSRTDFGVNAARYEPAPAAVTAPNFVMSPGDKDPGAGVLQNVTNPQLDGSGPANAVVTAYEVASDGHLISLGTATSDGTGNFAITPNTPLADGTHDIVFQAQKGDLTSPFSAPTSVVIDTKINTPTIGLPASSDSFGAGTVGTNHDDITNVTNPTLTGTAEAGATVYVSDGSGHTVSTIADSNGNYSVQAPGTLAEGNNVFTVQAVDKAGNTS…	3229	BPSL1661
BKP2_00884	PQLDGSGPANAVVTAYEVA	BPSL1661	231	MNTKMLLIRAGKVTPTTLKTLAVAGVDSGDEIVFSSLPANSELKRDGADLVVRTPDETFVLKDAAAKLADESVVVRLGEQPLVVTQAPNENTHLPAGVQLAGLAAPGQNSAFGLQSFVSAAGEQSLQSDTVSPVAMGAVTTSGIKDAGLSDGGLMGNLRTDVRPTDEIPMYQQKLTQLPLDPRIDVPSRTDFGVNAARYEPAPAAVTAPNFVMSPGDKDPGAGVLQNVTNPQLDGSGPANAVVTAYEVASDGHLISLGTATSDGTGNFAITPNTPLADGTHDIVFQAQKGDLTSPFSAPTSVVIDTKINTPTIGLPASSDSFGAGTVGTNHDDITNVTNPTLTGTAEAGATVYVSDGSGHTVSTIADSNGNYSVQAPGTLAEGNNVFTVQAVDKAGNTS…	3229	BPSL1661
BKP2_00885	LDGSGPANAVVTAYEVASD	BPSL1661	233	MNTKMLLIRAGKVTPTTLKTLAVAGVDSGDEIVFSSLPANSELKRDGADLVVRTPDETFVLKDAAAKLADESVVVRLGEQPLVVTQAPNENTHLPAGVQLAGLAAPGQNSAFGLQSFVSAAGEQSLQSDTVSPVAMGAVTTSGIKDAGLSDGGLMGNLRTDVRPTDEIPMYQQKLTQLPLDPRIDVPSRTDFGVNAARYEPAPAAVTAPNFVMSPGDKDPGAGVLQNVTNPQLDGSGPANAVVTAYEVASDGHLISLGTATSDGTGNFAITPNTPLADGTHDIVFQAQKGDLTSPFSAPTSVVIDTKINTPTIGLPASSDSFGAGTVGTNHDDITNVTNPTLTGTAEAGATVYVSDGSGHTVSTIADSNGNYSVQAPGTLAEGNNVFTVQAVDKAGNTS…	3229	BPSL1661
BKP2_00886	GSGPANAVVTAYEVASDGH	BPSL1661	235	MNTKMLLIRAGKVTPTTLKTLAVAGVDSGDEIVFSSLPANSELKRDGADLVVRTPDETFVLKDAAAKLADESVVVRLGEQPLVVTQAPNENTHLPAGVQLAGLAAPGQNSAFGLQSFVSAAGEQSLQSDTVSPVAMGAVTTSGIKDAGLSDGGLMGNLRTDVRPTDEIPMYQQKLTQLPLDPRIDVPSRTDFGVNAARYEPAPAAVTAPNFVMSPGDKDPGAGVLQNVTNPQLDGSGPANAVVTAYEVASDGHLISLGTATSDGTGNFAITPNTPLADGTHDIVFQAQKGDLTSPFSAPTSVVIDTKINTPTIGLPASSDSFGAGTVGTNHDDITNVTNPTLTGTAEAGATVYVSDGSGHTVSTIADSNGNYSVQAPGTLAEGNNVFTVQAVDKAGNTS…	3229	BPSL1661
BKP2_00887	GPANAVVTAYEVASDGHLI	BPSL1661	237	MNTKMLLIRAGKVTPTTLKTLAVAGVDSGDEIVFSSLPANSELKRDGADLVVRTPDETFVLKDAAAKLADESVVVRLGEQPLVVTQAPNENTHLPAGVQLAGLAAPGQNSAFGLQSFVSAAGEQSLQSDTVSPVAMGAVTTSGIKDAGLSDGGLMGNLRTDVRPTDEIPMYQQKLTQLPLDPRIDVPSRTDFGVNAARYEPAPAAVTAPNFVMSPGDKDPGAGVLQNVTNPQLDGSGPANAVVTAYEVASDGHLISLGTATSDGTGNFAITPNTPLADGTHDIVFQAQKGDLTSPFSAPTSVVIDTKINTPTIGLPASSDSFGAGTVGTNHDDITNVTNPTLTGTAEAGATVYVSDGSGHTVSTIADSNGNYSVQAPGTLAEGNNVFTVQAVDKAGNTS…	3229	BPSL1661
BKP2_00888	ANAVVTAYEVASDGHLISL	BPSL1661	239	MNTKMLLIRAGKVTPTTLKTLAVAGVDSGDEIVFSSLPANSELKRDGADLVVRTPDETFVLKDAAAKLADESVVVRLGEQPLVVTQAPNENTHLPAGVQLAGLAAPGQNSAFGLQSFVSAAGEQSLQSDTVSPVAMGAVTTSGIKDAGLSDGGLMGNLRTDVRPTDEIPMYQQKLTQLPLDPRIDVPSRTDFGVNAARYEPAPAAVTAPNFVMSPGDKDPGAGVLQNVTNPQLDGSGPANAVVTAYEVASDGHLISLGTATSDGTGNFAITPNTPLADGTHDIVFQAQKGDLTSPFSAPTSVVIDTKINTPTIGLPASSDSFGAGTVGTNHDDITNVTNPTLTGTAEAGATVYVSDGSGHTVSTIADSNGNYSVQAPGTLAEGNNVFTVQAVDKAGNTS…	3229	BPSL1661
BKP2_00889	AVVTAYEVASDGHLISLGT	BPSL1661	241	MNTKMLLIRAGKVTPTTLKTLAVAGVDSGDEIVFSSLPANSELKRDGADLVVRTPDETFVLKDAAAKLADESVVVRLGEQPLVVTQAPNENTHLPAGVQLAGLAAPGQNSAFGLQSFVSAAGEQSLQSDTVSPVAMGAVTTSGIKDAGLSDGGLMGNLRTDVRPTDEIPMYQQKLTQLPLDPRIDVPSRTDFGVNAARYEPAPAAVTAPNFVMSPGDKDPGAGVLQNVTNPQLDGSGPANAVVTAYEVASDGHLISLGTATSDGTGNFAITPNTPLADGTHDIVFQAQKGDLTSPFSAPTSVVIDTKINTPTIGLPASSDSFGAGTVGTNHDDITNVTNPTLTGTAEAGATVYVSDGSGHTVSTIADSNGNYSVQAPGTLAEGNNVFTVQAVDKAGNTS…	3229	BPSL1661
BKP2_00890	VTAYEVASDGHLISLGTAT	BPSL1661	243	MNTKMLLIRAGKVTPTTLKTLAVAGVDSGDEIVFSSLPANSELKRDGADLVVRTPDETFVLKDAAAKLADESVVVRLGEQPLVVTQAPNENTHLPAGVQLAGLAAPGQNSAFGLQSFVSAAGEQSLQSDTVSPVAMGAVTTSGIKDAGLSDGGLMGNLRTDVRPTDEIPMYQQKLTQLPLDPRIDVPSRTDFGVNAARYEPAPAAVTAPNFVMSPGDKDPGAGVLQNVTNPQLDGSGPANAVVTAYEVASDGHLISLGTATSDGTGNFAITPNTPLADGTHDIVFQAQKGDLTSPFSAPTSVVIDTKINTPTIGLPASSDSFGAGTVGTNHDDITNVTNPTLTGTAEAGATVYVSDGSGHTVSTIADSNGNYSVQAPGTLAEGNNVFTVQAVDKAGNTS…	3229	BPSL1661
BKP2_00891	AYEVASDGHLISLGTATSD	BPSL1661	245	MNTKMLLIRAGKVTPTTLKTLAVAGVDSGDEIVFSSLPANSELKRDGADLVVRTPDETFVLKDAAAKLADESVVVRLGEQPLVVTQAPNENTHLPAGVQLAGLAAPGQNSAFGLQSFVSAAGEQSLQSDTVSPVAMGAVTTSGIKDAGLSDGGLMGNLRTDVRPTDEIPMYQQKLTQLPLDPRIDVPSRTDFGVNAARYEPAPAAVTAPNFVMSPGDKDPGAGVLQNVTNPQLDGSGPANAVVTAYEVASDGHLISLGTATSDGTGNFAITPNTPLADGTHDIVFQAQKGDLTSPFSAPTSVVIDTKINTPTIGLPASSDSFGAGTVGTNHDDITNVTNPTLTGTAEAGATVYVSDGSGHTVSTIADSNGNYSVQAPGTLAEGNNVFTVQAVDKAGNTS…	3229	BPSL1661
BKP2_00892	EVASDGHLISLGTATSDGT	BPSL1661	247	MNTKMLLIRAGKVTPTTLKTLAVAGVDSGDEIVFSSLPANSELKRDGADLVVRTPDETFVLKDAAAKLADESVVVRLGEQPLVVTQAPNENTHLPAGVQLAGLAAPGQNSAFGLQSFVSAAGEQSLQSDTVSPVAMGAVTTSGIKDAGLSDGGLMGNLRTDVRPTDEIPMYQQKLTQLPLDPRIDVPSRTDFGVNAARYEPAPAAVTAPNFVMSPGDKDPGAGVLQNVTNPQLDGSGPANAVVTAYEVASDGHLISLGTATSDGTGNFAITPNTPLADGTHDIVFQAQKGDLTSPFSAPTSVVIDTKINTPTIGLPASSDSFGAGTVGTNHDDITNVTNPTLTGTAEAGATVYVSDGSGHTVSTIADSNGNYSVQAPGTLAEGNNVFTVQAVDKAGNTS…	3229	BPSL1661
BKP2_00893	ASDGHLISLGTATSDGTGN	BPSL1661	249	MNTKMLLIRAGKVTPTTLKTLAVAGVDSGDEIVFSSLPANSELKRDGADLVVRTPDETFVLKDAAAKLADESVVVRLGEQPLVVTQAPNENTHLPAGVQLAGLAAPGQNSAFGLQSFVSAAGEQSLQSDTVSPVAMGAVTTSGIKDAGLSDGGLMGNLRTDVRPTDEIPMYQQKLTQLPLDPRIDVPSRTDFGVNAARYEPAPAAVTAPNFVMSPGDKDPGAGVLQNVTNPQLDGSGPANAVVTAYEVASDGHLISLGTATSDGTGNFAITPNTPLADGTHDIVFQAQKGDLTSPFSAPTSVVIDTKINTPTIGLPASSDSFGAGTVGTNHDDITNVTNPTLTGTAEAGATVYVSDGSGHTVSTIADSNGNYSVQAPGTLAEGNNVFTVQAVDKAGNTS…	3229	BPSL1661
BKP2_00894	DGHLISLGTATSDGTGNFA	BPSL1661	251	MNTKMLLIRAGKVTPTTLKTLAVAGVDSGDEIVFSSLPANSELKRDGADLVVRTPDETFVLKDAAAKLADESVVVRLGEQPLVVTQAPNENTHLPAGVQLAGLAAPGQNSAFGLQSFVSAAGEQSLQSDTVSPVAMGAVTTSGIKDAGLSDGGLMGNLRTDVRPTDEIPMYQQKLTQLPLDPRIDVPSRTDFGVNAARYEPAPAAVTAPNFVMSPGDKDPGAGVLQNVTNPQLDGSGPANAVVTAYEVASDGHLISLGTATSDGTGNFAITPNTPLADGTHDIVFQAQKGDLTSPFSAPTSVVIDTKINTPTIGLPASSDSFGAGTVGTNHDDITNVTNPTLTGTAEAGATVYVSDGSGHTVSTIADSNGNYSVQAPGTLAEGNNVFTVQAVDKAGNTS…	3229	BPSL1661
BKP2_00895	HLISLGTATSDGTGNFAIT	BPSL1661	253	MNTKMLLIRAGKVTPTTLKTLAVAGVDSGDEIVFSSLPANSELKRDGADLVVRTPDETFVLKDAAAKLADESVVVRLGEQPLVVTQAPNENTHLPAGVQLAGLAAPGQNSAFGLQSFVSAAGEQSLQSDTVSPVAMGAVTTSGIKDAGLSDGGLMGNLRTDVRPTDEIPMYQQKLTQLPLDPRIDVPSRTDFGVNAARYEPAPAAVTAPNFVMSPGDKDPGAGVLQNVTNPQLDGSGPANAVVTAYEVASDGHLISLGTATSDGTGNFAITPNTPLADGTHDIVFQAQKGDLTSPFSAPTSVVIDTKINTPTIGLPASSDSFGAGTVGTNHDDITNVTNPTLTGTAEAGATVYVSDGSGHTVSTIADSNGNYSVQAPGTLAEGNNVFTVQAVDKAGNTS…	3229	BPSL1661
BKP2_00896	ISLGTATSDGTGNFAITPN	BPSL1661	255	MNTKMLLIRAGKVTPTTLKTLAVAGVDSGDEIVFSSLPANSELKRDGADLVVRTPDETFVLKDAAAKLADESVVVRLGEQPLVVTQAPNENTHLPAGVQLAGLAAPGQNSAFGLQSFVSAAGEQSLQSDTVSPVAMGAVTTSGIKDAGLSDGGLMGNLRTDVRPTDEIPMYQQKLTQLPLDPRIDVPSRTDFGVNAARYEPAPAAVTAPNFVMSPGDKDPGAGVLQNVTNPQLDGSGPANAVVTAYEVASDGHLISLGTATSDGTGNFAITPNTPLADGTHDIVFQAQKGDLTSPFSAPTSVVIDTKINTPTIGLPASSDSFGAGTVGTNHDDITNVTNPTLTGTAEAGATVYVSDGSGHTVSTIADSNGNYSVQAPGTLAEGNNVFTVQAVDKAGNTS…	3229	BPSL1661
BKP2_00897	LGTATSDGTGNFAITPNTP	BPSL1661	257	MNTKMLLIRAGKVTPTTLKTLAVAGVDSGDEIVFSSLPANSELKRDGADLVVRTPDETFVLKDAAAKLADESVVVRLGEQPLVVTQAPNENTHLPAGVQLAGLAAPGQNSAFGLQSFVSAAGEQSLQSDTVSPVAMGAVTTSGIKDAGLSDGGLMGNLRTDVRPTDEIPMYQQKLTQLPLDPRIDVPSRTDFGVNAARYEPAPAAVTAPNFVMSPGDKDPGAGVLQNVTNPQLDGSGPANAVVTAYEVASDGHLISLGTATSDGTGNFAITPNTPLADGTHDIVFQAQKGDLTSPFSAPTSVVIDTKINTPTIGLPASSDSFGAGTVGTNHDDITNVTNPTLTGTAEAGATVYVSDGSGHTVSTIADSNGNYSVQAPGTLAEGNNVFTVQAVDKAGNTS…	3229	BPSL1661
BKP2_00898	TATSDGTGNFAITPNTPLA	BPSL1661	259	MNTKMLLIRAGKVTPTTLKTLAVAGVDSGDEIVFSSLPANSELKRDGADLVVRTPDETFVLKDAAAKLADESVVVRLGEQPLVVTQAPNENTHLPAGVQLAGLAAPGQNSAFGLQSFVSAAGEQSLQSDTVSPVAMGAVTTSGIKDAGLSDGGLMGNLRTDVRPTDEIPMYQQKLTQLPLDPRIDVPSRTDFGVNAARYEPAPAAVTAPNFVMSPGDKDPGAGVLQNVTNPQLDGSGPANAVVTAYEVASDGHLISLGTATSDGTGNFAITPNTPLADGTHDIVFQAQKGDLTSPFSAPTSVVIDTKINTPTIGLPASSDSFGAGTVGTNHDDITNVTNPTLTGTAEAGATVYVSDGSGHTVSTIADSNGNYSVQAPGTLAEGNNVFTVQAVDKAGNTS…	3229	BPSL1661
BKP2_00899	TSDGTGNFAITPNTPLADG	BPSL1661	261	MNTKMLLIRAGKVTPTTLKTLAVAGVDSGDEIVFSSLPANSELKRDGADLVVRTPDETFVLKDAAAKLADESVVVRLGEQPLVVTQAPNENTHLPAGVQLAGLAAPGQNSAFGLQSFVSAAGEQSLQSDTVSPVAMGAVTTSGIKDAGLSDGGLMGNLRTDVRPTDEIPMYQQKLTQLPLDPRIDVPSRTDFGVNAARYEPAPAAVTAPNFVMSPGDKDPGAGVLQNVTNPQLDGSGPANAVVTAYEVASDGHLISLGTATSDGTGNFAITPNTPLADGTHDIVFQAQKGDLTSPFSAPTSVVIDTKINTPTIGLPASSDSFGAGTVGTNHDDITNVTNPTLTGTAEAGATVYVSDGSGHTVSTIADSNGNYSVQAPGTLAEGNNVFTVQAVDKAGNTS…	3229	BPSL1661
BKP2_00900	DGTGNFAITPNTPLADGTH	BPSL1661	263	MNTKMLLIRAGKVTPTTLKTLAVAGVDSGDEIVFSSLPANSELKRDGADLVVRTPDETFVLKDAAAKLADESVVVRLGEQPLVVTQAPNENTHLPAGVQLAGLAAPGQNSAFGLQSFVSAAGEQSLQSDTVSPVAMGAVTTSGIKDAGLSDGGLMGNLRTDVRPTDEIPMYQQKLTQLPLDPRIDVPSRTDFGVNAARYEPAPAAVTAPNFVMSPGDKDPGAGVLQNVTNPQLDGSGPANAVVTAYEVASDGHLISLGTATSDGTGNFAITPNTPLADGTHDIVFQAQKGDLTSPFSAPTSVVIDTKINTPTIGLPASSDSFGAGTVGTNHDDITNVTNPTLTGTAEAGATVYVSDGSGHTVSTIADSNGNYSVQAPGTLAEGNNVFTVQAVDKAGNTS…	3229	BPSL1661
BKP2_00901	TGNFAITPNTPLADGTHDI	BPSL1661	265	MNTKMLLIRAGKVTPTTLKTLAVAGVDSGDEIVFSSLPANSELKRDGADLVVRTPDETFVLKDAAAKLADESVVVRLGEQPLVVTQAPNENTHLPAGVQLAGLAAPGQNSAFGLQSFVSAAGEQSLQSDTVSPVAMGAVTTSGIKDAGLSDGGLMGNLRTDVRPTDEIPMYQQKLTQLPLDPRIDVPSRTDFGVNAARYEPAPAAVTAPNFVMSPGDKDPGAGVLQNVTNPQLDGSGPANAVVTAYEVASDGHLISLGTATSDGTGNFAITPNTPLADGTHDIVFQAQKGDLTSPFSAPTSVVIDTKINTPTIGLPASSDSFGAGTVGTNHDDITNVTNPTLTGTAEAGATVYVSDGSGHTVSTIADSNGNYSVQAPGTLAEGNNVFTVQAVDKAGNTS…	3229	BPSL1661
BKP2_00902	NFAITPNTPLADGTHDIVF	BPSL1661	267	MNTKMLLIRAGKVTPTTLKTLAVAGVDSGDEIVFSSLPANSELKRDGADLVVRTPDETFVLKDAAAKLADESVVVRLGEQPLVVTQAPNENTHLPAGVQLAGLAAPGQNSAFGLQSFVSAAGEQSLQSDTVSPVAMGAVTTSGIKDAGLSDGGLMGNLRTDVRPTDEIPMYQQKLTQLPLDPRIDVPSRTDFGVNAARYEPAPAAVTAPNFVMSPGDKDPGAGVLQNVTNPQLDGSGPANAVVTAYEVASDGHLISLGTATSDGTGNFAITPNTPLADGTHDIVFQAQKGDLTSPFSAPTSVVIDTKINTPTIGLPASSDSFGAGTVGTNHDDITNVTNPTLTGTAEAGATVYVSDGSGHTVSTIADSNGNYSVQAPGTLAEGNNVFTVQAVDKAGNTS…	3229	BPSL1661
BKP2_00903	AITPNTPLADGTHDIVFQA	BPSL1661	269	MNTKMLLIRAGKVTPTTLKTLAVAGVDSGDEIVFSSLPANSELKRDGADLVVRTPDETFVLKDAAAKLADESVVVRLGEQPLVVTQAPNENTHLPAGVQLAGLAAPGQNSAFGLQSFVSAAGEQSLQSDTVSPVAMGAVTTSGIKDAGLSDGGLMGNLRTDVRPTDEIPMYQQKLTQLPLDPRIDVPSRTDFGVNAARYEPAPAAVTAPNFVMSPGDKDPGAGVLQNVTNPQLDGSGPANAVVTAYEVASDGHLISLGTATSDGTGNFAITPNTPLADGTHDIVFQAQKGDLTSPFSAPTSVVIDTKINTPTIGLPASSDSFGAGTVGTNHDDITNVTNPTLTGTAEAGATVYVSDGSGHTVSTIADSNGNYSVQAPGTLAEGNNVFTVQAVDKAGNTS…	3229	BPSL1661
BKP2_00904	TPNTPLADGTHDIVFQAQK	BPSL1661	271	MNTKMLLIRAGKVTPTTLKTLAVAGVDSGDEIVFSSLPANSELKRDGADLVVRTPDETFVLKDAAAKLADESVVVRLGEQPLVVTQAPNENTHLPAGVQLAGLAAPGQNSAFGLQSFVSAAGEQSLQSDTVSPVAMGAVTTSGIKDAGLSDGGLMGNLRTDVRPTDEIPMYQQKLTQLPLDPRIDVPSRTDFGVNAARYEPAPAAVTAPNFVMSPGDKDPGAGVLQNVTNPQLDGSGPANAVVTAYEVASDGHLISLGTATSDGTGNFAITPNTPLADGTHDIVFQAQKGDLTSPFSAPTSVVIDTKINTPTIGLPASSDSFGAGTVGTNHDDITNVTNPTLTGTAEAGATVYVSDGSGHTVSTIADSNGNYSVQAPGTLAEGNNVFTVQAVDKAGNTS…	3229	BPSL1661
BKP2_00905	NTPLADGTHDIVFQAQKGD	BPSL1661	273	MNTKMLLIRAGKVTPTTLKTLAVAGVDSGDEIVFSSLPANSELKRDGADLVVRTPDETFVLKDAAAKLADESVVVRLGEQPLVVTQAPNENTHLPAGVQLAGLAAPGQNSAFGLQSFVSAAGEQSLQSDTVSPVAMGAVTTSGIKDAGLSDGGLMGNLRTDVRPTDEIPMYQQKLTQLPLDPRIDVPSRTDFGVNAARYEPAPAAVTAPNFVMSPGDKDPGAGVLQNVTNPQLDGSGPANAVVTAYEVASDGHLISLGTATSDGTGNFAITPNTPLADGTHDIVFQAQKGDLTSPFSAPTSVVIDTKINTPTIGLPASSDSFGAGTVGTNHDDITNVTNPTLTGTAEAGATVYVSDGSGHTVSTIADSNGNYSVQAPGTLAEGNNVFTVQAVDKAGNTS…	3229	BPSL1661
BKP2_00906	PLADGTHDIVFQAQKGDLT	BPSL1661	275	MNTKMLLIRAGKVTPTTLKTLAVAGVDSGDEIVFSSLPANSELKRDGADLVVRTPDETFVLKDAAAKLADESVVVRLGEQPLVVTQAPNENTHLPAGVQLAGLAAPGQNSAFGLQSFVSAAGEQSLQSDTVSPVAMGAVTTSGIKDAGLSDGGLMGNLRTDVRPTDEIPMYQQKLTQLPLDPRIDVPSRTDFGVNAARYEPAPAAVTAPNFVMSPGDKDPGAGVLQNVTNPQLDGSGPANAVVTAYEVASDGHLISLGTATSDGTGNFAITPNTPLADGTHDIVFQAQKGDLTSPFSAPTSVVIDTKINTPTIGLPASSDSFGAGTVGTNHDDITNVTNPTLTGTAEAGATVYVSDGSGHTVSTIADSNGNYSVQAPGTLAEGNNVFTVQAVDKAGNTS…	3229	BPSL1661
BKP2_00907	ADGTHDIVFQAQKGDLTSP	BPSL1661	277	MNTKMLLIRAGKVTPTTLKTLAVAGVDSGDEIVFSSLPANSELKRDGADLVVRTPDETFVLKDAAAKLADESVVVRLGEQPLVVTQAPNENTHLPAGVQLAGLAAPGQNSAFGLQSFVSAAGEQSLQSDTVSPVAMGAVTTSGIKDAGLSDGGLMGNLRTDVRPTDEIPMYQQKLTQLPLDPRIDVPSRTDFGVNAARYEPAPAAVTAPNFVMSPGDKDPGAGVLQNVTNPQLDGSGPANAVVTAYEVASDGHLISLGTATSDGTGNFAITPNTPLADGTHDIVFQAQKGDLTSPFSAPTSVVIDTKINTPTIGLPASSDSFGAGTVGTNHDDITNVTNPTLTGTAEAGATVYVSDGSGHTVSTIADSNGNYSVQAPGTLAEGNNVFTVQAVDKAGNTS…	3229	BPSL1661
BKP2_00908	GTHDIVFQAQKGDLTSPFS	BPSL1661	279	MNTKMLLIRAGKVTPTTLKTLAVAGVDSGDEIVFSSLPANSELKRDGADLVVRTPDETFVLKDAAAKLADESVVVRLGEQPLVVTQAPNENTHLPAGVQLAGLAAPGQNSAFGLQSFVSAAGEQSLQSDTVSPVAMGAVTTSGIKDAGLSDGGLMGNLRTDVRPTDEIPMYQQKLTQLPLDPRIDVPSRTDFGVNAARYEPAPAAVTAPNFVMSPGDKDPGAGVLQNVTNPQLDGSGPANAVVTAYEVASDGHLISLGTATSDGTGNFAITPNTPLADGTHDIVFQAQKGDLTSPFSAPTSVVIDTKINTPTIGLPASSDSFGAGTVGTNHDDITNVTNPTLTGTAEAGATVYVSDGSGHTVSTIADSNGNYSVQAPGTLAEGNNVFTVQAVDKAGNTS…	3229	BPSL1661
BKP2_00909	HDIVFQAQKGDLTSPFSAP	BPSL1661	281	MNTKMLLIRAGKVTPTTLKTLAVAGVDSGDEIVFSSLPANSELKRDGADLVVRTPDETFVLKDAAAKLADESVVVRLGEQPLVVTQAPNENTHLPAGVQLAGLAAPGQNSAFGLQSFVSAAGEQSLQSDTVSPVAMGAVTTSGIKDAGLSDGGLMGNLRTDVRPTDEIPMYQQKLTQLPLDPRIDVPSRTDFGVNAARYEPAPAAVTAPNFVMSPGDKDPGAGVLQNVTNPQLDGSGPANAVVTAYEVASDGHLISLGTATSDGTGNFAITPNTPLADGTHDIVFQAQKGDLTSPFSAPTSVVIDTKINTPTIGLPASSDSFGAGTVGTNHDDITNVTNPTLTGTAEAGATVYVSDGSGHTVSTIADSNGNYSVQAPGTLAEGNNVFTVQAVDKAGNTS…	3229	BPSL1661
BKP2_00910	IVFQAQKGDLTSPFSAPTS	BPSL1661	283	MNTKMLLIRAGKVTPTTLKTLAVAGVDSGDEIVFSSLPANSELKRDGADLVVRTPDETFVLKDAAAKLADESVVVRLGEQPLVVTQAPNENTHLPAGVQLAGLAAPGQNSAFGLQSFVSAAGEQSLQSDTVSPVAMGAVTTSGIKDAGLSDGGLMGNLRTDVRPTDEIPMYQQKLTQLPLDPRIDVPSRTDFGVNAARYEPAPAAVTAPNFVMSPGDKDPGAGVLQNVTNPQLDGSGPANAVVTAYEVASDGHLISLGTATSDGTGNFAITPNTPLADGTHDIVFQAQKGDLTSPFSAPTSVVIDTKINTPTIGLPASSDSFGAGTVGTNHDDITNVTNPTLTGTAEAGATVYVSDGSGHTVSTIADSNGNYSVQAPGTLAEGNNVFTVQAVDKAGNTS…	3229	BPSL1661
BKP2_00911	FQAQKGDLTSPFSAPTSVV	BPSL1661	285	MNTKMLLIRAGKVTPTTLKTLAVAGVDSGDEIVFSSLPANSELKRDGADLVVRTPDETFVLKDAAAKLADESVVVRLGEQPLVVTQAPNENTHLPAGVQLAGLAAPGQNSAFGLQSFVSAAGEQSLQSDTVSPVAMGAVTTSGIKDAGLSDGGLMGNLRTDVRPTDEIPMYQQKLTQLPLDPRIDVPSRTDFGVNAARYEPAPAAVTAPNFVMSPGDKDPGAGVLQNVTNPQLDGSGPANAVVTAYEVASDGHLISLGTATSDGTGNFAITPNTPLADGTHDIVFQAQKGDLTSPFSAPTSVVIDTKINTPTIGLPASSDSFGAGTVGTNHDDITNVTNPTLTGTAEAGATVYVSDGSGHTVSTIADSNGNYSVQAPGTLAEGNNVFTVQAVDKAGNTS…	3229	BPSL1661
BKP2_00912	AQKGDLTSPFSAPTSVVID	BPSL1661	287	MNTKMLLIRAGKVTPTTLKTLAVAGVDSGDEIVFSSLPANSELKRDGADLVVRTPDETFVLKDAAAKLADESVVVRLGEQPLVVTQAPNENTHLPAGVQLAGLAAPGQNSAFGLQSFVSAAGEQSLQSDTVSPVAMGAVTTSGIKDAGLSDGGLMGNLRTDVRPTDEIPMYQQKLTQLPLDPRIDVPSRTDFGVNAARYEPAPAAVTAPNFVMSPGDKDPGAGVLQNVTNPQLDGSGPANAVVTAYEVASDGHLISLGTATSDGTGNFAITPNTPLADGTHDIVFQAQKGDLTSPFSAPTSVVIDTKINTPTIGLPASSDSFGAGTVGTNHDDITNVTNPTLTGTAEAGATVYVSDGSGHTVSTIADSNGNYSVQAPGTLAEGNNVFTVQAVDKAGNTS…	3229	BPSL1661
BKP2_00913	KGDLTSPFSAPTSVVIDTK	BPSL1661	289	MNTKMLLIRAGKVTPTTLKTLAVAGVDSGDEIVFSSLPANSELKRDGADLVVRTPDETFVLKDAAAKLADESVVVRLGEQPLVVTQAPNENTHLPAGVQLAGLAAPGQNSAFGLQSFVSAAGEQSLQSDTVSPVAMGAVTTSGIKDAGLSDGGLMGNLRTDVRPTDEIPMYQQKLTQLPLDPRIDVPSRTDFGVNAARYEPAPAAVTAPNFVMSPGDKDPGAGVLQNVTNPQLDGSGPANAVVTAYEVASDGHLISLGTATSDGTGNFAITPNTPLADGTHDIVFQAQKGDLTSPFSAPTSVVIDTKINTPTIGLPASSDSFGAGTVGTNHDDITNVTNPTLTGTAEAGATVYVSDGSGHTVSTIADSNGNYSVQAPGTLAEGNNVFTVQAVDKAGNTS…	3229	BPSL1661
BKP2_00914	DLTSPFSAPTSVVIDTKIN	BPSL1661	291	MNTKMLLIRAGKVTPTTLKTLAVAGVDSGDEIVFSSLPANSELKRDGADLVVRTPDETFVLKDAAAKLADESVVVRLGEQPLVVTQAPNENTHLPAGVQLAGLAAPGQNSAFGLQSFVSAAGEQSLQSDTVSPVAMGAVTTSGIKDAGLSDGGLMGNLRTDVRPTDEIPMYQQKLTQLPLDPRIDVPSRTDFGVNAARYEPAPAAVTAPNFVMSPGDKDPGAGVLQNVTNPQLDGSGPANAVVTAYEVASDGHLISLGTATSDGTGNFAITPNTPLADGTHDIVFQAQKGDLTSPFSAPTSVVIDTKINTPTIGLPASSDSFGAGTVGTNHDDITNVTNPTLTGTAEAGATVYVSDGSGHTVSTIADSNGNYSVQAPGTLAEGNNVFTVQAVDKAGNTS…	3229	BPSL1661
BKP2_00915	TSPFSAPTSVVIDTKINTP	BPSL1661	293	MNTKMLLIRAGKVTPTTLKTLAVAGVDSGDEIVFSSLPANSELKRDGADLVVRTPDETFVLKDAAAKLADESVVVRLGEQPLVVTQAPNENTHLPAGVQLAGLAAPGQNSAFGLQSFVSAAGEQSLQSDTVSPVAMGAVTTSGIKDAGLSDGGLMGNLRTDVRPTDEIPMYQQKLTQLPLDPRIDVPSRTDFGVNAARYEPAPAAVTAPNFVMSPGDKDPGAGVLQNVTNPQLDGSGPANAVVTAYEVASDGHLISLGTATSDGTGNFAITPNTPLADGTHDIVFQAQKGDLTSPFSAPTSVVIDTKINTPTIGLPASSDSFGAGTVGTNHDDITNVTNPTLTGTAEAGATVYVSDGSGHTVSTIADSNGNYSVQAPGTLAEGNNVFTVQAVDKAGNTS…	3229	BPSL1661
BKP2_00916	PFSAPTSVVIDTKINTPTI	BPSL1661	295	MNTKMLLIRAGKVTPTTLKTLAVAGVDSGDEIVFSSLPANSELKRDGADLVVRTPDETFVLKDAAAKLADESVVVRLGEQPLVVTQAPNENTHLPAGVQLAGLAAPGQNSAFGLQSFVSAAGEQSLQSDTVSPVAMGAVTTSGIKDAGLSDGGLMGNLRTDVRPTDEIPMYQQKLTQLPLDPRIDVPSRTDFGVNAARYEPAPAAVTAPNFVMSPGDKDPGAGVLQNVTNPQLDGSGPANAVVTAYEVASDGHLISLGTATSDGTGNFAITPNTPLADGTHDIVFQAQKGDLTSPFSAPTSVVIDTKINTPTIGLPASSDSFGAGTVGTNHDDITNVTNPTLTGTAEAGATVYVSDGSGHTVSTIADSNGNYSVQAPGTLAEGNNVFTVQAVDKAGNTS…	3229	BPSL1661
BKP2_00917	SAPTSVVIDTKINTPTIGL	BPSL1661	297	MNTKMLLIRAGKVTPTTLKTLAVAGVDSGDEIVFSSLPANSELKRDGADLVVRTPDETFVLKDAAAKLADESVVVRLGEQPLVVTQAPNENTHLPAGVQLAGLAAPGQNSAFGLQSFVSAAGEQSLQSDTVSPVAMGAVTTSGIKDAGLSDGGLMGNLRTDVRPTDEIPMYQQKLTQLPLDPRIDVPSRTDFGVNAARYEPAPAAVTAPNFVMSPGDKDPGAGVLQNVTNPQLDGSGPANAVVTAYEVASDGHLISLGTATSDGTGNFAITPNTPLADGTHDIVFQAQKGDLTSPFSAPTSVVIDTKINTPTIGLPASSDSFGAGTVGTNHDDITNVTNPTLTGTAEAGATVYVSDGSGHTVSTIADSNGNYSVQAPGTLAEGNNVFTVQAVDKAGNTS…	3229	BPSL1661
BKP2_00918	PTSVVIDTKINTPTIGLPA	BPSL1661	299	MNTKMLLIRAGKVTPTTLKTLAVAGVDSGDEIVFSSLPANSELKRDGADLVVRTPDETFVLKDAAAKLADESVVVRLGEQPLVVTQAPNENTHLPAGVQLAGLAAPGQNSAFGLQSFVSAAGEQSLQSDTVSPVAMGAVTTSGIKDAGLSDGGLMGNLRTDVRPTDEIPMYQQKLTQLPLDPRIDVPSRTDFGVNAARYEPAPAAVTAPNFVMSPGDKDPGAGVLQNVTNPQLDGSGPANAVVTAYEVASDGHLISLGTATSDGTGNFAITPNTPLADGTHDIVFQAQKGDLTSPFSAPTSVVIDTKINTPTIGLPASSDSFGAGTVGTNHDDITNVTNPTLTGTAEAGATVYVSDGSGHTVSTIADSNGNYSVQAPGTLAEGNNVFTVQAVDKAGNTS…	3229	BPSL1661
BKP2_00919	SVVIDTKINTPTIGLPASS	BPSL1661	301	MNTKMLLIRAGKVTPTTLKTLAVAGVDSGDEIVFSSLPANSELKRDGADLVVRTPDETFVLKDAAAKLADESVVVRLGEQPLVVTQAPNENTHLPAGVQLAGLAAPGQNSAFGLQSFVSAAGEQSLQSDTVSPVAMGAVTTSGIKDAGLSDGGLMGNLRTDVRPTDEIPMYQQKLTQLPLDPRIDVPSRTDFGVNAARYEPAPAAVTAPNFVMSPGDKDPGAGVLQNVTNPQLDGSGPANAVVTAYEVASDGHLISLGTATSDGTGNFAITPNTPLADGTHDIVFQAQKGDLTSPFSAPTSVVIDTKINTPTIGLPASSDSFGAGTVGTNHDDITNVTNPTLTGTAEAGATVYVSDGSGHTVSTIADSNGNYSVQAPGTLAEGNNVFTVQAVDKAGNTS…	3229	BPSL1661
BKP2_00920	VIDTKINTPTIGLPASSDS	BPSL1661	303	MNTKMLLIRAGKVTPTTLKTLAVAGVDSGDEIVFSSLPANSELKRDGADLVVRTPDETFVLKDAAAKLADESVVVRLGEQPLVVTQAPNENTHLPAGVQLAGLAAPGQNSAFGLQSFVSAAGEQSLQSDTVSPVAMGAVTTSGIKDAGLSDGGLMGNLRTDVRPTDEIPMYQQKLTQLPLDPRIDVPSRTDFGVNAARYEPAPAAVTAPNFVMSPGDKDPGAGVLQNVTNPQLDGSGPANAVVTAYEVASDGHLISLGTATSDGTGNFAITPNTPLADGTHDIVFQAQKGDLTSPFSAPTSVVIDTKINTPTIGLPASSDSFGAGTVGTNHDDITNVTNPTLTGTAEAGATVYVSDGSGHTVSTIADSNGNYSVQAPGTLAEGNNVFTVQAVDKAGNTS…	3229	BPSL1661
BKP2_00921	DTKINTPTIGLPASSDSFG	BPSL1661	305	MNTKMLLIRAGKVTPTTLKTLAVAGVDSGDEIVFSSLPANSELKRDGADLVVRTPDETFVLKDAAAKLADESVVVRLGEQPLVVTQAPNENTHLPAGVQLAGLAAPGQNSAFGLQSFVSAAGEQSLQSDTVSPVAMGAVTTSGIKDAGLSDGGLMGNLRTDVRPTDEIPMYQQKLTQLPLDPRIDVPSRTDFGVNAARYEPAPAAVTAPNFVMSPGDKDPGAGVLQNVTNPQLDGSGPANAVVTAYEVASDGHLISLGTATSDGTGNFAITPNTPLADGTHDIVFQAQKGDLTSPFSAPTSVVIDTKINTPTIGLPASSDSFGAGTVGTNHDDITNVTNPTLTGTAEAGATVYVSDGSGHTVSTIADSNGNYSVQAPGTLAEGNNVFTVQAVDKAGNTS…	3229	BPSL1661
BKP2_00922	KINTPTIGLPASSDSFGAG	BPSL1661	307	MNTKMLLIRAGKVTPTTLKTLAVAGVDSGDEIVFSSLPANSELKRDGADLVVRTPDETFVLKDAAAKLADESVVVRLGEQPLVVTQAPNENTHLPAGVQLAGLAAPGQNSAFGLQSFVSAAGEQSLQSDTVSPVAMGAVTTSGIKDAGLSDGGLMGNLRTDVRPTDEIPMYQQKLTQLPLDPRIDVPSRTDFGVNAARYEPAPAAVTAPNFVMSPGDKDPGAGVLQNVTNPQLDGSGPANAVVTAYEVASDGHLISLGTATSDGTGNFAITPNTPLADGTHDIVFQAQKGDLTSPFSAPTSVVIDTKINTPTIGLPASSDSFGAGTVGTNHDDITNVTNPTLTGTAEAGATVYVSDGSGHTVSTIADSNGNYSVQAPGTLAEGNNVFTVQAVDKAGNTS…	3229	BPSL1661
BKP2_00923	NTPTIGLPASSDSFGAGTV	BPSL1661	309	MNTKMLLIRAGKVTPTTLKTLAVAGVDSGDEIVFSSLPANSELKRDGADLVVRTPDETFVLKDAAAKLADESVVVRLGEQPLVVTQAPNENTHLPAGVQLAGLAAPGQNSAFGLQSFVSAAGEQSLQSDTVSPVAMGAVTTSGIKDAGLSDGGLMGNLRTDVRPTDEIPMYQQKLTQLPLDPRIDVPSRTDFGVNAARYEPAPAAVTAPNFVMSPGDKDPGAGVLQNVTNPQLDGSGPANAVVTAYEVASDGHLISLGTATSDGTGNFAITPNTPLADGTHDIVFQAQKGDLTSPFSAPTSVVIDTKINTPTIGLPASSDSFGAGTVGTNHDDITNVTNPTLTGTAEAGATVYVSDGSGHTVSTIADSNGNYSVQAPGTLAEGNNVFTVQAVDKAGNTS…	3229	BPSL1661
BKP2_00924	PTIGLPASSDSFGAGTVGT	BPSL1661	311	MNTKMLLIRAGKVTPTTLKTLAVAGVDSGDEIVFSSLPANSELKRDGADLVVRTPDETFVLKDAAAKLADESVVVRLGEQPLVVTQAPNENTHLPAGVQLAGLAAPGQNSAFGLQSFVSAAGEQSLQSDTVSPVAMGAVTTSGIKDAGLSDGGLMGNLRTDVRPTDEIPMYQQKLTQLPLDPRIDVPSRTDFGVNAARYEPAPAAVTAPNFVMSPGDKDPGAGVLQNVTNPQLDGSGPANAVVTAYEVASDGHLISLGTATSDGTGNFAITPNTPLADGTHDIVFQAQKGDLTSPFSAPTSVVIDTKINTPTIGLPASSDSFGAGTVGTNHDDITNVTNPTLTGTAEAGATVYVSDGSGHTVSTIADSNGNYSVQAPGTLAEGNNVFTVQAVDKAGNTS…	3229	BPSL1661
BKP2_00925	IGLPASSDSFGAGTVGTNH	BPSL1661	313	MNTKMLLIRAGKVTPTTLKTLAVAGVDSGDEIVFSSLPANSELKRDGADLVVRTPDETFVLKDAAAKLADESVVVRLGEQPLVVTQAPNENTHLPAGVQLAGLAAPGQNSAFGLQSFVSAAGEQSLQSDTVSPVAMGAVTTSGIKDAGLSDGGLMGNLRTDVRPTDEIPMYQQKLTQLPLDPRIDVPSRTDFGVNAARYEPAPAAVTAPNFVMSPGDKDPGAGVLQNVTNPQLDGSGPANAVVTAYEVASDGHLISLGTATSDGTGNFAITPNTPLADGTHDIVFQAQKGDLTSPFSAPTSVVIDTKINTPTIGLPASSDSFGAGTVGTNHDDITNVTNPTLTGTAEAGATVYVSDGSGHTVSTIADSNGNYSVQAPGTLAEGNNVFTVQAVDKAGNTS…	3229	BPSL1661
BKP2_00926	LPASSDSFGAGTVGTNHDD	BPSL1661	315	MNTKMLLIRAGKVTPTTLKTLAVAGVDSGDEIVFSSLPANSELKRDGADLVVRTPDETFVLKDAAAKLADESVVVRLGEQPLVVTQAPNENTHLPAGVQLAGLAAPGQNSAFGLQSFVSAAGEQSLQSDTVSPVAMGAVTTSGIKDAGLSDGGLMGNLRTDVRPTDEIPMYQQKLTQLPLDPRIDVPSRTDFGVNAARYEPAPAAVTAPNFVMSPGDKDPGAGVLQNVTNPQLDGSGPANAVVTAYEVASDGHLISLGTATSDGTGNFAITPNTPLADGTHDIVFQAQKGDLTSPFSAPTSVVIDTKINTPTIGLPASSDSFGAGTVGTNHDDITNVTNPTLTGTAEAGATVYVSDGSGHTVSTIADSNGNYSVQAPGTLAEGNNVFTVQAVDKAGNTS…	3229	BPSL1661
[truncated: 30,046 more rows]
