# Supplementary material for: PepSeq as a highly multiplexed platform for melioidosis antigen discovery and vaccine development
Source: Front Immunol. 2025 Jul 3;16:1605758. doi: 10.3389/fimmu.2025.1605758 (PMC12267161; doi:10.3389/fimmu.2025.1605758)
Supplement: Supplementary file 6 [file Table4.xlsx]

## Sheet: Supplementary_Table_4
Supplementary Table 4. MUT Peptide Library Metadata
CodeName	OrigName	Category	Peptide	MutatedPosition	OrigResidue	MutResidue	OrigStart	OrigEnd
MUT_000000	Burk_A_13002-7_mAb_8E4-18E7	Original	ELDVVEGMQFDRGYLSPYFINNPDKQVAVL
MUT_000001	Burk_A_13002-7_mAb_8E4-18E7	SingleMut	GLDVVEGMQFDRGYLSPYFINNPDKQVAVL	1	E	G
MUT_000002	Burk_A_13002-7_mAb_8E4-18E7	SingleMut	YLDVVEGMQFDRGYLSPYFINNPDKQVAVL	1	E	Y
MUT_000003	Burk_A_13002-7_mAb_8E4-18E7	SingleMut	TLDVVEGMQFDRGYLSPYFINNPDKQVAVL	1	E	T
MUT_000004	Burk_A_13002-7_mAb_8E4-18E7	SingleMut	SLDVVEGMQFDRGYLSPYFINNPDKQVAVL	1	E	S
MUT_000005	Burk_A_13002-7_mAb_8E4-18E7	SingleMut	RLDVVEGMQFDRGYLSPYFINNPDKQVAVL	1	E	R
MUT_000006	Burk_A_13002-7_mAb_8E4-18E7	SingleMut	ILDVVEGMQFDRGYLSPYFINNPDKQVAVL	1	E	I
MUT_000007	Burk_A_13002-7_mAb_8E4-18E7	SingleMut	HLDVVEGMQFDRGYLSPYFINNPDKQVAVL	1	E	H
MUT_000008	Burk_A_13002-7_mAb_8E4-18E7	SingleMut	LLDVVEGMQFDRGYLSPYFINNPDKQVAVL	1	E	L
MUT_000009	Burk_A_13002-7_mAb_8E4-18E7	SingleMut	VLDVVEGMQFDRGYLSPYFINNPDKQVAVL	1	E	V
MUT_000010	Burk_A_13002-7_mAb_8E4-18E7	SingleMut	FLDVVEGMQFDRGYLSPYFINNPDKQVAVL	1	E	F
MUT_000011	Burk_A_13002-7_mAb_8E4-18E7	SingleMut	MLDVVEGMQFDRGYLSPYFINNPDKQVAVL	1	E	M
MUT_000012	Burk_A_13002-7_mAb_8E4-18E7	SingleMut	NLDVVEGMQFDRGYLSPYFINNPDKQVAVL	1	E	N
MUT_000013	Burk_A_13002-7_mAb_8E4-18E7	SingleMut	CLDVVEGMQFDRGYLSPYFINNPDKQVAVL	1	E	C
MUT_000014	Burk_A_13002-7_mAb_8E4-18E7	SingleMut	WLDVVEGMQFDRGYLSPYFINNPDKQVAVL	1	E	W
MUT_000015	Burk_A_13002-7_mAb_8E4-18E7	SingleMut	PLDVVEGMQFDRGYLSPYFINNPDKQVAVL	1	E	P
MUT_000016	Burk_A_13002-7_mAb_8E4-18E7	SingleMut	ALDVVEGMQFDRGYLSPYFINNPDKQVAVL	1	E	A
MUT_000017	Burk_A_13002-7_mAb_8E4-18E7	SingleMut	QLDVVEGMQFDRGYLSPYFINNPDKQVAVL	1	E	Q
MUT_000018	Burk_A_13002-7_mAb_8E4-18E7	SingleMut	KLDVVEGMQFDRGYLSPYFINNPDKQVAVL	1	E	K
MUT_000019	Burk_A_13002-7_mAb_8E4-18E7	SingleMut	DLDVVEGMQFDRGYLSPYFINNPDKQVAVL	1	E	D
MUT_000020	Burk_A_13002-7_mAb_8E4-18E7	SingleMut	EGDVVEGMQFDRGYLSPYFINNPDKQVAVL	2	L	G
MUT_000021	Burk_A_13002-7_mAb_8E4-18E7	SingleMut	EYDVVEGMQFDRGYLSPYFINNPDKQVAVL	2	L	Y
MUT_000022	Burk_A_13002-7_mAb_8E4-18E7	SingleMut	ETDVVEGMQFDRGYLSPYFINNPDKQVAVL	2	L	T
MUT_000023	Burk_A_13002-7_mAb_8E4-18E7	SingleMut	ESDVVEGMQFDRGYLSPYFINNPDKQVAVL	2	L	S
MUT_000024	Burk_A_13002-7_mAb_8E4-18E7	SingleMut	ERDVVEGMQFDRGYLSPYFINNPDKQVAVL	2	L	R
MUT_000025	Burk_A_13002-7_mAb_8E4-18E7	SingleMut	EEDVVEGMQFDRGYLSPYFINNPDKQVAVL	2	L	E
MUT_000026	Burk_A_13002-7_mAb_8E4-18E7	SingleMut	EIDVVEGMQFDRGYLSPYFINNPDKQVAVL	2	L	I
MUT_000027	Burk_A_13002-7_mAb_8E4-18E7	SingleMut	EHDVVEGMQFDRGYLSPYFINNPDKQVAVL	2	L	H
MUT_000028	Burk_A_13002-7_mAb_8E4-18E7	SingleMut	EVDVVEGMQFDRGYLSPYFINNPDKQVAVL	2	L	V
MUT_000029	Burk_A_13002-7_mAb_8E4-18E7	SingleMut	EFDVVEGMQFDRGYLSPYFINNPDKQVAVL	2	L	F
MUT_000030	Burk_A_13002-7_mAb_8E4-18E7	SingleMut	EMDVVEGMQFDRGYLSPYFINNPDKQVAVL	2	L	M
MUT_000031	Burk_A_13002-7_mAb_8E4-18E7	SingleMut	ENDVVEGMQFDRGYLSPYFINNPDKQVAVL	2	L	N
MUT_000032	Burk_A_13002-7_mAb_8E4-18E7	SingleMut	ECDVVEGMQFDRGYLSPYFINNPDKQVAVL	2	L	C
MUT_000033	Burk_A_13002-7_mAb_8E4-18E7	SingleMut	EWDVVEGMQFDRGYLSPYFINNPDKQVAVL	2	L	W
MUT_000034	Burk_A_13002-7_mAb_8E4-18E7	SingleMut	EPDVVEGMQFDRGYLSPYFINNPDKQVAVL	2	L	P
MUT_000035	Burk_A_13002-7_mAb_8E4-18E7	SingleMut	EADVVEGMQFDRGYLSPYFINNPDKQVAVL	2	L	A
MUT_000036	Burk_A_13002-7_mAb_8E4-18E7	SingleMut	EQDVVEGMQFDRGYLSPYFINNPDKQVAVL	2	L	Q
MUT_000037	Burk_A_13002-7_mAb_8E4-18E7	SingleMut	EKDVVEGMQFDRGYLSPYFINNPDKQVAVL	2	L	K
MUT_000038	Burk_A_13002-7_mAb_8E4-18E7	SingleMut	EDDVVEGMQFDRGYLSPYFINNPDKQVAVL	2	L	D
MUT_000039	Burk_A_13002-7_mAb_8E4-18E7	SingleMut	ELGVVEGMQFDRGYLSPYFINNPDKQVAVL	3	D	G
MUT_000040	Burk_A_13002-7_mAb_8E4-18E7	SingleMut	ELYVVEGMQFDRGYLSPYFINNPDKQVAVL	3	D	Y
MUT_000041	Burk_A_13002-7_mAb_8E4-18E7	SingleMut	ELTVVEGMQFDRGYLSPYFINNPDKQVAVL	3	D	T
MUT_000042	Burk_A_13002-7_mAb_8E4-18E7	SingleMut	ELSVVEGMQFDRGYLSPYFINNPDKQVAVL	3	D	S
MUT_000043	Burk_A_13002-7_mAb_8E4-18E7	SingleMut	ELRVVEGMQFDRGYLSPYFINNPDKQVAVL	3	D	R
MUT_000044	Burk_A_13002-7_mAb_8E4-18E7	SingleMut	ELEVVEGMQFDRGYLSPYFINNPDKQVAVL	3	D	E
MUT_000045	Burk_A_13002-7_mAb_8E4-18E7	SingleMut	ELIVVEGMQFDRGYLSPYFINNPDKQVAVL	3	D	I
MUT_000046	Burk_A_13002-7_mAb_8E4-18E7	SingleMut	ELHVVEGMQFDRGYLSPYFINNPDKQVAVL	3	D	H
MUT_000047	Burk_A_13002-7_mAb_8E4-18E7	SingleMut	ELLVVEGMQFDRGYLSPYFINNPDKQVAVL	3	D	L
MUT_000048	Burk_A_13002-7_mAb_8E4-18E7	SingleMut	ELVVVEGMQFDRGYLSPYFINNPDKQVAVL	3	D	V
MUT_000049	Burk_A_13002-7_mAb_8E4-18E7	SingleMut	ELFVVEGMQFDRGYLSPYFINNPDKQVAVL	3	D	F
MUT_000050	Burk_A_13002-7_mAb_8E4-18E7	SingleMut	ELMVVEGMQFDRGYLSPYFINNPDKQVAVL	3	D	M
MUT_000051	Burk_A_13002-7_mAb_8E4-18E7	SingleMut	ELNVVEGMQFDRGYLSPYFINNPDKQVAVL	3	D	N
MUT_000052	Burk_A_13002-7_mAb_8E4-18E7	SingleMut	ELCVVEGMQFDRGYLSPYFINNPDKQVAVL	3	D	C
MUT_000053	Burk_A_13002-7_mAb_8E4-18E7	SingleMut	ELWVVEGMQFDRGYLSPYFINNPDKQVAVL	3	D	W
MUT_000054	Burk_A_13002-7_mAb_8E4-18E7	SingleMut	ELPVVEGMQFDRGYLSPYFINNPDKQVAVL	3	D	P
MUT_000055	Burk_A_13002-7_mAb_8E4-18E7	SingleMut	ELAVVEGMQFDRGYLSPYFINNPDKQVAVL	3	D	A
MUT_000056	Burk_A_13002-7_mAb_8E4-18E7	SingleMut	ELQVVEGMQFDRGYLSPYFINNPDKQVAVL	3	D	Q
MUT_000057	Burk_A_13002-7_mAb_8E4-18E7	SingleMut	ELKVVEGMQFDRGYLSPYFINNPDKQVAVL	3	D	K
MUT_000058	Burk_A_13002-7_mAb_8E4-18E7	SingleMut	ELDGVEGMQFDRGYLSPYFINNPDKQVAVL	4	V	G
MUT_000059	Burk_A_13002-7_mAb_8E4-18E7	SingleMut	ELDYVEGMQFDRGYLSPYFINNPDKQVAVL	4	V	Y
MUT_000060	Burk_A_13002-7_mAb_8E4-18E7	SingleMut	ELDTVEGMQFDRGYLSPYFINNPDKQVAVL	4	V	T
MUT_000061	Burk_A_13002-7_mAb_8E4-18E7	SingleMut	ELDSVEGMQFDRGYLSPYFINNPDKQVAVL	4	V	S
MUT_000062	Burk_A_13002-7_mAb_8E4-18E7	SingleMut	ELDRVEGMQFDRGYLSPYFINNPDKQVAVL	4	V	R
MUT_000063	Burk_A_13002-7_mAb_8E4-18E7	SingleMut	ELDEVEGMQFDRGYLSPYFINNPDKQVAVL	4	V	E
MUT_000064	Burk_A_13002-7_mAb_8E4-18E7	SingleMut	ELDIVEGMQFDRGYLSPYFINNPDKQVAVL	4	V	I
MUT_000065	Burk_A_13002-7_mAb_8E4-18E7	SingleMut	ELDHVEGMQFDRGYLSPYFINNPDKQVAVL	4	V	H
MUT_000066	Burk_A_13002-7_mAb_8E4-18E7	SingleMut	ELDLVEGMQFDRGYLSPYFINNPDKQVAVL	4	V	L
MUT_000067	Burk_A_13002-7_mAb_8E4-18E7	SingleMut	ELDFVEGMQFDRGYLSPYFINNPDKQVAVL	4	V	F
MUT_000068	Burk_A_13002-7_mAb_8E4-18E7	SingleMut	ELDMVEGMQFDRGYLSPYFINNPDKQVAVL	4	V	M
MUT_000069	Burk_A_13002-7_mAb_8E4-18E7	SingleMut	ELDNVEGMQFDRGYLSPYFINNPDKQVAVL	4	V	N
MUT_000070	Burk_A_13002-7_mAb_8E4-18E7	SingleMut	ELDCVEGMQFDRGYLSPYFINNPDKQVAVL	4	V	C
MUT_000071	Burk_A_13002-7_mAb_8E4-18E7	SingleMut	ELDWVEGMQFDRGYLSPYFINNPDKQVAVL	4	V	W
MUT_000072	Burk_A_13002-7_mAb_8E4-18E7	SingleMut	ELDPVEGMQFDRGYLSPYFINNPDKQVAVL	4	V	P
MUT_000073	Burk_A_13002-7_mAb_8E4-18E7	SingleMut	ELDAVEGMQFDRGYLSPYFINNPDKQVAVL	4	V	A
MUT_000074	Burk_A_13002-7_mAb_8E4-18E7	SingleMut	ELDQVEGMQFDRGYLSPYFINNPDKQVAVL	4	V	Q
MUT_000075	Burk_A_13002-7_mAb_8E4-18E7	SingleMut	ELDKVEGMQFDRGYLSPYFINNPDKQVAVL	4	V	K
MUT_000076	Burk_A_13002-7_mAb_8E4-18E7	SingleMut	ELDDVEGMQFDRGYLSPYFINNPDKQVAVL	4	V	D
MUT_000077	Burk_A_13002-7_mAb_8E4-18E7	SingleMut	ELDVGEGMQFDRGYLSPYFINNPDKQVAVL	5	V	G
MUT_000078	Burk_A_13002-7_mAb_8E4-18E7	SingleMut	ELDVYEGMQFDRGYLSPYFINNPDKQVAVL	5	V	Y
MUT_000079	Burk_A_13002-7_mAb_8E4-18E7	SingleMut	ELDVTEGMQFDRGYLSPYFINNPDKQVAVL	5	V	T
MUT_000080	Burk_A_13002-7_mAb_8E4-18E7	SingleMut	ELDVSEGMQFDRGYLSPYFINNPDKQVAVL	5	V	S
MUT_000081	Burk_A_13002-7_mAb_8E4-18E7	SingleMut	ELDVREGMQFDRGYLSPYFINNPDKQVAVL	5	V	R
MUT_000082	Burk_A_13002-7_mAb_8E4-18E7	SingleMut	ELDVEEGMQFDRGYLSPYFINNPDKQVAVL	5	V	E
MUT_000083	Burk_A_13002-7_mAb_8E4-18E7	SingleMut	ELDVIEGMQFDRGYLSPYFINNPDKQVAVL	5	V	I
MUT_000084	Burk_A_13002-7_mAb_8E4-18E7	SingleMut	ELDVHEGMQFDRGYLSPYFINNPDKQVAVL	5	V	H
MUT_000085	Burk_A_13002-7_mAb_8E4-18E7	SingleMut	ELDVLEGMQFDRGYLSPYFINNPDKQVAVL	5	V	L
MUT_000086	Burk_A_13002-7_mAb_8E4-18E7	SingleMut	ELDVFEGMQFDRGYLSPYFINNPDKQVAVL	5	V	F
MUT_000087	Burk_A_13002-7_mAb_8E4-18E7	SingleMut	ELDVMEGMQFDRGYLSPYFINNPDKQVAVL	5	V	M
MUT_000088	Burk_A_13002-7_mAb_8E4-18E7	SingleMut	ELDVNEGMQFDRGYLSPYFINNPDKQVAVL	5	V	N
MUT_000089	Burk_A_13002-7_mAb_8E4-18E7	SingleMut	ELDVCEGMQFDRGYLSPYFINNPDKQVAVL	5	V	C
MUT_000090	Burk_A_13002-7_mAb_8E4-18E7	SingleMut	ELDVWEGMQFDRGYLSPYFINNPDKQVAVL	5	V	W
MUT_000091	Burk_A_13002-7_mAb_8E4-18E7	SingleMut	ELDVPEGMQFDRGYLSPYFINNPDKQVAVL	5	V	P
MUT_000092	Burk_A_13002-7_mAb_8E4-18E7	SingleMut	ELDVAEGMQFDRGYLSPYFINNPDKQVAVL	5	V	A
MUT_000093	Burk_A_13002-7_mAb_8E4-18E7	SingleMut	ELDVQEGMQFDRGYLSPYFINNPDKQVAVL	5	V	Q
MUT_000094	Burk_A_13002-7_mAb_8E4-18E7	SingleMut	ELDVKEGMQFDRGYLSPYFINNPDKQVAVL	5	V	K
MUT_000095	Burk_A_13002-7_mAb_8E4-18E7	SingleMut	ELDVDEGMQFDRGYLSPYFINNPDKQVAVL	5	V	D
MUT_000096	Burk_A_13002-7_mAb_8E4-18E7	SingleMut	ELDVVGGMQFDRGYLSPYFINNPDKQVAVL	6	E	G
MUT_000097	Burk_A_13002-7_mAb_8E4-18E7	SingleMut	ELDVVYGMQFDRGYLSPYFINNPDKQVAVL	6	E	Y
MUT_000098	Burk_A_13002-7_mAb_8E4-18E7	SingleMut	ELDVVTGMQFDRGYLSPYFINNPDKQVAVL	6	E	T
MUT_000099	Burk_A_13002-7_mAb_8E4-18E7	SingleMut	ELDVVSGMQFDRGYLSPYFINNPDKQVAVL	6	E	S
MUT_000100	Burk_A_13002-7_mAb_8E4-18E7	SingleMut	ELDVVRGMQFDRGYLSPYFINNPDKQVAVL	6	E	R
MUT_000101	Burk_A_13002-7_mAb_8E4-18E7	SingleMut	ELDVVIGMQFDRGYLSPYFINNPDKQVAVL	6	E	I
MUT_000102	Burk_A_13002-7_mAb_8E4-18E7	SingleMut	ELDVVHGMQFDRGYLSPYFINNPDKQVAVL	6	E	H
MUT_000103	Burk_A_13002-7_mAb_8E4-18E7	SingleMut	ELDVVLGMQFDRGYLSPYFINNPDKQVAVL	6	E	L
MUT_000104	Burk_A_13002-7_mAb_8E4-18E7	SingleMut	ELDVVVGMQFDRGYLSPYFINNPDKQVAVL	6	E	V
MUT_000105	Burk_A_13002-7_mAb_8E4-18E7	SingleMut	ELDVVFGMQFDRGYLSPYFINNPDKQVAVL	6	E	F
MUT_000106	Burk_A_13002-7_mAb_8E4-18E7	SingleMut	ELDVVMGMQFDRGYLSPYFINNPDKQVAVL	6	E	M
MUT_000107	Burk_A_13002-7_mAb_8E4-18E7	SingleMut	ELDVVNGMQFDRGYLSPYFINNPDKQVAVL	6	E	N
MUT_000108	Burk_A_13002-7_mAb_8E4-18E7	SingleMut	ELDVVCGMQFDRGYLSPYFINNPDKQVAVL	6	E	C
MUT_000109	Burk_A_13002-7_mAb_8E4-18E7	SingleMut	ELDVVWGMQFDRGYLSPYFINNPDKQVAVL	6	E	W
MUT_000110	Burk_A_13002-7_mAb_8E4-18E7	SingleMut	ELDVVPGMQFDRGYLSPYFINNPDKQVAVL	6	E	P
MUT_000111	Burk_A_13002-7_mAb_8E4-18E7	SingleMut	ELDVVAGMQFDRGYLSPYFINNPDKQVAVL	6	E	A
MUT_000112	Burk_A_13002-7_mAb_8E4-18E7	SingleMut	ELDVVQGMQFDRGYLSPYFINNPDKQVAVL	6	E	Q
MUT_000113	Burk_A_13002-7_mAb_8E4-18E7	SingleMut	ELDVVKGMQFDRGYLSPYFINNPDKQVAVL	6	E	K
MUT_000114	Burk_A_13002-7_mAb_8E4-18E7	SingleMut	ELDVVDGMQFDRGYLSPYFINNPDKQVAVL	6	E	D
MUT_000115	Burk_A_13002-7_mAb_8E4-18E7	SingleMut	ELDVVEYMQFDRGYLSPYFINNPDKQVAVL	7	G	Y
MUT_000116	Burk_A_13002-7_mAb_8E4-18E7	SingleMut	ELDVVETMQFDRGYLSPYFINNPDKQVAVL	7	G	T
MUT_000117	Burk_A_13002-7_mAb_8E4-18E7	SingleMut	ELDVVESMQFDRGYLSPYFINNPDKQVAVL	7	G	S
MUT_000118	Burk_A_13002-7_mAb_8E4-18E7	SingleMut	ELDVVERMQFDRGYLSPYFINNPDKQVAVL	7	G	R
MUT_000119	Burk_A_13002-7_mAb_8E4-18E7	SingleMut	ELDVVEEMQFDRGYLSPYFINNPDKQVAVL	7	G	E
MUT_000120	Burk_A_13002-7_mAb_8E4-18E7	SingleMut	ELDVVEIMQFDRGYLSPYFINNPDKQVAVL	7	G	I
MUT_000121	Burk_A_13002-7_mAb_8E4-18E7	SingleMut	ELDVVEHMQFDRGYLSPYFINNPDKQVAVL	7	G	H
MUT_000122	Burk_A_13002-7_mAb_8E4-18E7	SingleMut	ELDVVELMQFDRGYLSPYFINNPDKQVAVL	7	G	L
MUT_000123	Burk_A_13002-7_mAb_8E4-18E7	SingleMut	ELDVVEVMQFDRGYLSPYFINNPDKQVAVL	7	G	V
MUT_000124	Burk_A_13002-7_mAb_8E4-18E7	SingleMut	ELDVVEFMQFDRGYLSPYFINNPDKQVAVL	7	G	F
MUT_000125	Burk_A_13002-7_mAb_8E4-18E7	SingleMut	ELDVVEMMQFDRGYLSPYFINNPDKQVAVL	7	G	M
MUT_000126	Burk_A_13002-7_mAb_8E4-18E7	SingleMut	ELDVVENMQFDRGYLSPYFINNPDKQVAVL	7	G	N
MUT_000127	Burk_A_13002-7_mAb_8E4-18E7	SingleMut	ELDVVECMQFDRGYLSPYFINNPDKQVAVL	7	G	C
MUT_000128	Burk_A_13002-7_mAb_8E4-18E7	SingleMut	ELDVVEWMQFDRGYLSPYFINNPDKQVAVL	7	G	W
MUT_000129	Burk_A_13002-7_mAb_8E4-18E7	SingleMut	ELDVVEPMQFDRGYLSPYFINNPDKQVAVL	7	G	P
MUT_000130	Burk_A_13002-7_mAb_8E4-18E7	SingleMut	ELDVVEAMQFDRGYLSPYFINNPDKQVAVL	7	G	A
MUT_000131	Burk_A_13002-7_mAb_8E4-18E7	SingleMut	ELDVVEQMQFDRGYLSPYFINNPDKQVAVL	7	G	Q
MUT_000132	Burk_A_13002-7_mAb_8E4-18E7	SingleMut	ELDVVEKMQFDRGYLSPYFINNPDKQVAVL	7	G	K
MUT_000133	Burk_A_13002-7_mAb_8E4-18E7	SingleMut	ELDVVEDMQFDRGYLSPYFINNPDKQVAVL	7	G	D
MUT_000134	Burk_A_13002-7_mAb_8E4-18E7	SingleMut	ELDVVEGGQFDRGYLSPYFINNPDKQVAVL	8	M	G
MUT_000135	Burk_A_13002-7_mAb_8E4-18E7	SingleMut	ELDVVEGYQFDRGYLSPYFINNPDKQVAVL	8	M	Y
MUT_000136	Burk_A_13002-7_mAb_8E4-18E7	SingleMut	ELDVVEGTQFDRGYLSPYFINNPDKQVAVL	8	M	T
MUT_000137	Burk_A_13002-7_mAb_8E4-18E7	SingleMut	ELDVVEGSQFDRGYLSPYFINNPDKQVAVL	8	M	S
MUT_000138	Burk_A_13002-7_mAb_8E4-18E7	SingleMut	ELDVVEGRQFDRGYLSPYFINNPDKQVAVL	8	M	R
MUT_000139	Burk_A_13002-7_mAb_8E4-18E7	SingleMut	ELDVVEGEQFDRGYLSPYFINNPDKQVAVL	8	M	E
MUT_000140	Burk_A_13002-7_mAb_8E4-18E7	SingleMut	ELDVVEGIQFDRGYLSPYFINNPDKQVAVL	8	M	I
MUT_000141	Burk_A_13002-7_mAb_8E4-18E7	SingleMut	ELDVVEGHQFDRGYLSPYFINNPDKQVAVL	8	M	H
MUT_000142	Burk_A_13002-7_mAb_8E4-18E7	SingleMut	ELDVVEGLQFDRGYLSPYFINNPDKQVAVL	8	M	L
MUT_000143	Burk_A_13002-7_mAb_8E4-18E7	SingleMut	ELDVVEGVQFDRGYLSPYFINNPDKQVAVL	8	M	V
MUT_000144	Burk_A_13002-7_mAb_8E4-18E7	SingleMut	ELDVVEGFQFDRGYLSPYFINNPDKQVAVL	8	M	F
MUT_000145	Burk_A_13002-7_mAb_8E4-18E7	SingleMut	ELDVVEGNQFDRGYLSPYFINNPDKQVAVL	8	M	N
MUT_000146	Burk_A_13002-7_mAb_8E4-18E7	SingleMut	ELDVVEGCQFDRGYLSPYFINNPDKQVAVL	8	M	C
MUT_000147	Burk_A_13002-7_mAb_8E4-18E7	SingleMut	ELDVVEGWQFDRGYLSPYFINNPDKQVAVL	8	M	W
MUT_000148	Burk_A_13002-7_mAb_8E4-18E7	SingleMut	ELDVVEGPQFDRGYLSPYFINNPDKQVAVL	8	M	P
MUT_000149	Burk_A_13002-7_mAb_8E4-18E7	SingleMut	ELDVVEGAQFDRGYLSPYFINNPDKQVAVL	8	M	A
MUT_000150	Burk_A_13002-7_mAb_8E4-18E7	SingleMut	ELDVVEGQQFDRGYLSPYFINNPDKQVAVL	8	M	Q
MUT_000151	Burk_A_13002-7_mAb_8E4-18E7	SingleMut	ELDVVEGKQFDRGYLSPYFINNPDKQVAVL	8	M	K
MUT_000152	Burk_A_13002-7_mAb_8E4-18E7	SingleMut	ELDVVEGDQFDRGYLSPYFINNPDKQVAVL	8	M	D
MUT_000153	Burk_A_13002-7_mAb_8E4-18E7	SingleMut	ELDVVEGMGFDRGYLSPYFINNPDKQVAVL	9	Q	G
MUT_000154	Burk_A_13002-7_mAb_8E4-18E7	SingleMut	ELDVVEGMYFDRGYLSPYFINNPDKQVAVL	9	Q	Y
MUT_000155	Burk_A_13002-7_mAb_8E4-18E7	SingleMut	ELDVVEGMTFDRGYLSPYFINNPDKQVAVL	9	Q	T
MUT_000156	Burk_A_13002-7_mAb_8E4-18E7	SingleMut	ELDVVEGMSFDRGYLSPYFINNPDKQVAVL	9	Q	S
MUT_000157	Burk_A_13002-7_mAb_8E4-18E7	SingleMut	ELDVVEGMRFDRGYLSPYFINNPDKQVAVL	9	Q	R
MUT_000158	Burk_A_13002-7_mAb_8E4-18E7	SingleMut	ELDVVEGMEFDRGYLSPYFINNPDKQVAVL	9	Q	E
MUT_000159	Burk_A_13002-7_mAb_8E4-18E7	SingleMut	ELDVVEGMIFDRGYLSPYFINNPDKQVAVL	9	Q	I
MUT_000160	Burk_A_13002-7_mAb_8E4-18E7	SingleMut	ELDVVEGMHFDRGYLSPYFINNPDKQVAVL	9	Q	H
MUT_000161	Burk_A_13002-7_mAb_8E4-18E7	SingleMut	ELDVVEGMLFDRGYLSPYFINNPDKQVAVL	9	Q	L
MUT_000162	Burk_A_13002-7_mAb_8E4-18E7	SingleMut	ELDVVEGMVFDRGYLSPYFINNPDKQVAVL	9	Q	V
MUT_000163	Burk_A_13002-7_mAb_8E4-18E7	SingleMut	ELDVVEGMFFDRGYLSPYFINNPDKQVAVL	9	Q	F
MUT_000164	Burk_A_13002-7_mAb_8E4-18E7	SingleMut	ELDVVEGMMFDRGYLSPYFINNPDKQVAVL	9	Q	M
MUT_000165	Burk_A_13002-7_mAb_8E4-18E7	SingleMut	ELDVVEGMNFDRGYLSPYFINNPDKQVAVL	9	Q	N
MUT_000166	Burk_A_13002-7_mAb_8E4-18E7	SingleMut	ELDVVEGMCFDRGYLSPYFINNPDKQVAVL	9	Q	C
MUT_000167	Burk_A_13002-7_mAb_8E4-18E7	SingleMut	ELDVVEGMWFDRGYLSPYFINNPDKQVAVL	9	Q	W
MUT_000168	Burk_A_13002-7_mAb_8E4-18E7	SingleMut	ELDVVEGMPFDRGYLSPYFINNPDKQVAVL	9	Q	P
MUT_000169	Burk_A_13002-7_mAb_8E4-18E7	SingleMut	ELDVVEGMAFDRGYLSPYFINNPDKQVAVL	9	Q	A
MUT_000170	Burk_A_13002-7_mAb_8E4-18E7	SingleMut	ELDVVEGMKFDRGYLSPYFINNPDKQVAVL	9	Q	K
MUT_000171	Burk_A_13002-7_mAb_8E4-18E7	SingleMut	ELDVVEGMDFDRGYLSPYFINNPDKQVAVL	9	Q	D
MUT_000172	Burk_A_13002-7_mAb_8E4-18E7	SingleMut	ELDVVEGMQGDRGYLSPYFINNPDKQVAVL	10	F	G
MUT_000173	Burk_A_13002-7_mAb_8E4-18E7	SingleMut	ELDVVEGMQYDRGYLSPYFINNPDKQVAVL	10	F	Y
MUT_000174	Burk_A_13002-7_mAb_8E4-18E7	SingleMut	ELDVVEGMQTDRGYLSPYFINNPDKQVAVL	10	F	T
MUT_000175	Burk_A_13002-7_mAb_8E4-18E7	SingleMut	ELDVVEGMQSDRGYLSPYFINNPDKQVAVL	10	F	S
MUT_000176	Burk_A_13002-7_mAb_8E4-18E7	SingleMut	ELDVVEGMQRDRGYLSPYFINNPDKQVAVL	10	F	R
MUT_000177	Burk_A_13002-7_mAb_8E4-18E7	SingleMut	ELDVVEGMQEDRGYLSPYFINNPDKQVAVL	10	F	E
MUT_000178	Burk_A_13002-7_mAb_8E4-18E7	SingleMut	ELDVVEGMQIDRGYLSPYFINNPDKQVAVL	10	F	I
MUT_000179	Burk_A_13002-7_mAb_8E4-18E7	SingleMut	ELDVVEGMQHDRGYLSPYFINNPDKQVAVL	10	F	H
MUT_000180	Burk_A_13002-7_mAb_8E4-18E7	SingleMut	ELDVVEGMQLDRGYLSPYFINNPDKQVAVL	10	F	L
MUT_000181	Burk_A_13002-7_mAb_8E4-18E7	SingleMut	ELDVVEGMQVDRGYLSPYFINNPDKQVAVL	10	F	V
MUT_000182	Burk_A_13002-7_mAb_8E4-18E7	SingleMut	ELDVVEGMQMDRGYLSPYFINNPDKQVAVL	10	F	M
MUT_000183	Burk_A_13002-7_mAb_8E4-18E7	SingleMut	ELDVVEGMQNDRGYLSPYFINNPDKQVAVL	10	F	N
MUT_000184	Burk_A_13002-7_mAb_8E4-18E7	SingleMut	ELDVVEGMQCDRGYLSPYFINNPDKQVAVL	10	F	C
MUT_000185	Burk_A_13002-7_mAb_8E4-18E7	SingleMut	ELDVVEGMQWDRGYLSPYFINNPDKQVAVL	10	F	W
MUT_000186	Burk_A_13002-7_mAb_8E4-18E7	SingleMut	ELDVVEGMQPDRGYLSPYFINNPDKQVAVL	10	F	P
MUT_000187	Burk_A_13002-7_mAb_8E4-18E7	SingleMut	ELDVVEGMQADRGYLSPYFINNPDKQVAVL	10	F	A
MUT_000188	Burk_A_13002-7_mAb_8E4-18E7	SingleMut	ELDVVEGMQQDRGYLSPYFINNPDKQVAVL	10	F	Q
MUT_000189	Burk_A_13002-7_mAb_8E4-18E7	SingleMut	ELDVVEGMQKDRGYLSPYFINNPDKQVAVL	10	F	K
MUT_000190	Burk_A_13002-7_mAb_8E4-18E7	SingleMut	ELDVVEGMQDDRGYLSPYFINNPDKQVAVL	10	F	D
MUT_000191	Burk_A_13002-7_mAb_8E4-18E7	SingleMut	ELDVVEGMQFGRGYLSPYFINNPDKQVAVL	11	D	G
MUT_000192	Burk_A_13002-7_mAb_8E4-18E7	SingleMut	ELDVVEGMQFYRGYLSPYFINNPDKQVAVL	11	D	Y
MUT_000193	Burk_A_13002-7_mAb_8E4-18E7	SingleMut	ELDVVEGMQFTRGYLSPYFINNPDKQVAVL	11	D	T
MUT_000194	Burk_A_13002-7_mAb_8E4-18E7	SingleMut	ELDVVEGMQFSRGYLSPYFINNPDKQVAVL	11	D	S
MUT_000195	Burk_A_13002-7_mAb_8E4-18E7	SingleMut	ELDVVEGMQFRRGYLSPYFINNPDKQVAVL	11	D	R
MUT_000196	Burk_A_13002-7_mAb_8E4-18E7	SingleMut	ELDVVEGMQFERGYLSPYFINNPDKQVAVL	11	D	E
MUT_000197	Burk_A_13002-7_mAb_8E4-18E7	SingleMut	ELDVVEGMQFIRGYLSPYFINNPDKQVAVL	11	D	I
MUT_000198	Burk_A_13002-7_mAb_8E4-18E7	SingleMut	ELDVVEGMQFHRGYLSPYFINNPDKQVAVL	11	D	H
MUT_000199	Burk_A_13002-7_mAb_8E4-18E7	SingleMut	ELDVVEGMQFLRGYLSPYFINNPDKQVAVL	11	D	L
MUT_000200	Burk_A_13002-7_mAb_8E4-18E7	SingleMut	ELDVVEGMQFVRGYLSPYFINNPDKQVAVL	11	D	V
MUT_000201	Burk_A_13002-7_mAb_8E4-18E7	SingleMut	ELDVVEGMQFFRGYLSPYFINNPDKQVAVL	11	D	F
MUT_000202	Burk_A_13002-7_mAb_8E4-18E7	SingleMut	ELDVVEGMQFMRGYLSPYFINNPDKQVAVL	11	D	M
MUT_000203	Burk_A_13002-7_mAb_8E4-18E7	SingleMut	ELDVVEGMQFNRGYLSPYFINNPDKQVAVL	11	D	N
MUT_000204	Burk_A_13002-7_mAb_8E4-18E7	SingleMut	ELDVVEGMQFCRGYLSPYFINNPDKQVAVL	11	D	C
MUT_000205	Burk_A_13002-7_mAb_8E4-18E7	SingleMut	ELDVVEGMQFWRGYLSPYFINNPDKQVAVL	11	D	W
MUT_000206	Burk_A_13002-7_mAb_8E4-18E7	SingleMut	ELDVVEGMQFPRGYLSPYFINNPDKQVAVL	11	D	P
MUT_000207	Burk_A_13002-7_mAb_8E4-18E7	SingleMut	ELDVVEGMQFARGYLSPYFINNPDKQVAVL	11	D	A
MUT_000208	Burk_A_13002-7_mAb_8E4-18E7	SingleMut	ELDVVEGMQFQRGYLSPYFINNPDKQVAVL	11	D	Q
MUT_000209	Burk_A_13002-7_mAb_8E4-18E7	SingleMut	ELDVVEGMQFKRGYLSPYFINNPDKQVAVL	11	D	K
MUT_000210	Burk_A_13002-7_mAb_8E4-18E7	SingleMut	ELDVVEGMQFDGGYLSPYFINNPDKQVAVL	12	R	G
MUT_000211	Burk_A_13002-7_mAb_8E4-18E7	SingleMut	ELDVVEGMQFDYGYLSPYFINNPDKQVAVL	12	R	Y
MUT_000212	Burk_A_13002-7_mAb_8E4-18E7	SingleMut	ELDVVEGMQFDTGYLSPYFINNPDKQVAVL	12	R	T
MUT_000213	Burk_A_13002-7_mAb_8E4-18E7	SingleMut	ELDVVEGMQFDSGYLSPYFINNPDKQVAVL	12	R	S
MUT_000214	Burk_A_13002-7_mAb_8E4-18E7	SingleMut	ELDVVEGMQFDEGYLSPYFINNPDKQVAVL	12	R	E
MUT_000215	Burk_A_13002-7_mAb_8E4-18E7	SingleMut	ELDVVEGMQFDIGYLSPYFINNPDKQVAVL	12	R	I
MUT_000216	Burk_A_13002-7_mAb_8E4-18E7	SingleMut	ELDVVEGMQFDHGYLSPYFINNPDKQVAVL	12	R	H
MUT_000217	Burk_A_13002-7_mAb_8E4-18E7	SingleMut	ELDVVEGMQFDLGYLSPYFINNPDKQVAVL	12	R	L
MUT_000218	Burk_A_13002-7_mAb_8E4-18E7	SingleMut	ELDVVEGMQFDVGYLSPYFINNPDKQVAVL	12	R	V
MUT_000219	Burk_A_13002-7_mAb_8E4-18E7	SingleMut	ELDVVEGMQFDFGYLSPYFINNPDKQVAVL	12	R	F
MUT_000220	Burk_A_13002-7_mAb_8E4-18E7	SingleMut	ELDVVEGMQFDMGYLSPYFINNPDKQVAVL	12	R	M
MUT_000221	Burk_A_13002-7_mAb_8E4-18E7	SingleMut	ELDVVEGMQFDNGYLSPYFINNPDKQVAVL	12	R	N
MUT_000222	Burk_A_13002-7_mAb_8E4-18E7	SingleMut	ELDVVEGMQFDCGYLSPYFINNPDKQVAVL	12	R	C
MUT_000223	Burk_A_13002-7_mAb_8E4-18E7	SingleMut	ELDVVEGMQFDWGYLSPYFINNPDKQVAVL	12	R	W
MUT_000224	Burk_A_13002-7_mAb_8E4-18E7	SingleMut	ELDVVEGMQFDPGYLSPYFINNPDKQVAVL	12	R	P
MUT_000225	Burk_A_13002-7_mAb_8E4-18E7	SingleMut	ELDVVEGMQFDAGYLSPYFINNPDKQVAVL	12	R	A
MUT_000226	Burk_A_13002-7_mAb_8E4-18E7	SingleMut	ELDVVEGMQFDQGYLSPYFINNPDKQVAVL	12	R	Q
MUT_000227	Burk_A_13002-7_mAb_8E4-18E7	SingleMut	ELDVVEGMQFDKGYLSPYFINNPDKQVAVL	12	R	K
MUT_000228	Burk_A_13002-7_mAb_8E4-18E7	SingleMut	ELDVVEGMQFDDGYLSPYFINNPDKQVAVL	12	R	D
MUT_000229	Burk_A_13002-7_mAb_8E4-18E7	SingleMut	ELDVVEGMQFDRYYLSPYFINNPDKQVAVL	13	G	Y
MUT_000230	Burk_A_13002-7_mAb_8E4-18E7	SingleMut	ELDVVEGMQFDRTYLSPYFINNPDKQVAVL	13	G	T
MUT_000231	Burk_A_13002-7_mAb_8E4-18E7	SingleMut	ELDVVEGMQFDRSYLSPYFINNPDKQVAVL	13	G	S
MUT_000232	Burk_A_13002-7_mAb_8E4-18E7	SingleMut	ELDVVEGMQFDRRYLSPYFINNPDKQVAVL	13	G	R
MUT_000233	Burk_A_13002-7_mAb_8E4-18E7	SingleMut	ELDVVEGMQFDREYLSPYFINNPDKQVAVL	13	G	E
MUT_000234	Burk_A_13002-7_mAb_8E4-18E7	SingleMut	ELDVVEGMQFDRIYLSPYFINNPDKQVAVL	13	G	I
MUT_000235	Burk_A_13002-7_mAb_8E4-18E7	SingleMut	ELDVVEGMQFDRHYLSPYFINNPDKQVAVL	13	G	H
MUT_000236	Burk_A_13002-7_mAb_8E4-18E7	SingleMut	ELDVVEGMQFDRLYLSPYFINNPDKQVAVL	13	G	L
MUT_000237	Burk_A_13002-7_mAb_8E4-18E7	SingleMut	ELDVVEGMQFDRVYLSPYFINNPDKQVAVL	13	G	V
MUT_000238	Burk_A_13002-7_mAb_8E4-18E7	SingleMut	ELDVVEGMQFDRFYLSPYFINNPDKQVAVL	13	G	F
MUT_000239	Burk_A_13002-7_mAb_8E4-18E7	SingleMut	ELDVVEGMQFDRMYLSPYFINNPDKQVAVL	13	G	M
MUT_000240	Burk_A_13002-7_mAb_8E4-18E7	SingleMut	ELDVVEGMQFDRNYLSPYFINNPDKQVAVL	13	G	N
MUT_000241	Burk_A_13002-7_mAb_8E4-18E7	SingleMut	ELDVVEGMQFDRCYLSPYFINNPDKQVAVL	13	G	C
MUT_000242	Burk_A_13002-7_mAb_8E4-18E7	SingleMut	ELDVVEGMQFDRWYLSPYFINNPDKQVAVL	13	G	W
MUT_000243	Burk_A_13002-7_mAb_8E4-18E7	SingleMut	ELDVVEGMQFDRPYLSPYFINNPDKQVAVL	13	G	P
MUT_000244	Burk_A_13002-7_mAb_8E4-18E7	SingleMut	ELDVVEGMQFDRAYLSPYFINNPDKQVAVL	13	G	A
MUT_000245	Burk_A_13002-7_mAb_8E4-18E7	SingleMut	ELDVVEGMQFDRQYLSPYFINNPDKQVAVL	13	G	Q
MUT_000246	Burk_A_13002-7_mAb_8E4-18E7	SingleMut	ELDVVEGMQFDRKYLSPYFINNPDKQVAVL	13	G	K
MUT_000247	Burk_A_13002-7_mAb_8E4-18E7	SingleMut	ELDVVEGMQFDRDYLSPYFINNPDKQVAVL	13	G	D
MUT_000248	Burk_A_13002-7_mAb_8E4-18E7	SingleMut	ELDVVEGMQFDRGGLSPYFINNPDKQVAVL	14	Y	G
MUT_000249	Burk_A_13002-7_mAb_8E4-18E7	SingleMut	ELDVVEGMQFDRGTLSPYFINNPDKQVAVL	14	Y	T
MUT_000250	Burk_A_13002-7_mAb_8E4-18E7	SingleMut	ELDVVEGMQFDRGSLSPYFINNPDKQVAVL	14	Y	S
MUT_000251	Burk_A_13002-7_mAb_8E4-18E7	SingleMut	ELDVVEGMQFDRGRLSPYFINNPDKQVAVL	14	Y	R
MUT_000252	Burk_A_13002-7_mAb_8E4-18E7	SingleMut	ELDVVEGMQFDRGELSPYFINNPDKQVAVL	14	Y	E
MUT_000253	Burk_A_13002-7_mAb_8E4-18E7	SingleMut	ELDVVEGMQFDRGILSPYFINNPDKQVAVL	14	Y	I
MUT_000254	Burk_A_13002-7_mAb_8E4-18E7	SingleMut	ELDVVEGMQFDRGHLSPYFINNPDKQVAVL	14	Y	H
MUT_000255	Burk_A_13002-7_mAb_8E4-18E7	SingleMut	ELDVVEGMQFDRGLLSPYFINNPDKQVAVL	14	Y	L
MUT_000256	Burk_A_13002-7_mAb_8E4-18E7	SingleMut	ELDVVEGMQFDRGVLSPYFINNPDKQVAVL	14	Y	V
MUT_000257	Burk_A_13002-7_mAb_8E4-18E7	SingleMut	ELDVVEGMQFDRGFLSPYFINNPDKQVAVL	14	Y	F
MUT_000258	Burk_A_13002-7_mAb_8E4-18E7	SingleMut	ELDVVEGMQFDRGMLSPYFINNPDKQVAVL	14	Y	M
MUT_000259	Burk_A_13002-7_mAb_8E4-18E7	SingleMut	ELDVVEGMQFDRGNLSPYFINNPDKQVAVL	14	Y	N
MUT_000260	Burk_A_13002-7_mAb_8E4-18E7	SingleMut	ELDVVEGMQFDRGCLSPYFINNPDKQVAVL	14	Y	C
MUT_000261	Burk_A_13002-7_mAb_8E4-18E7	SingleMut	ELDVVEGMQFDRGWLSPYFINNPDKQVAVL	14	Y	W
MUT_000262	Burk_A_13002-7_mAb_8E4-18E7	SingleMut	ELDVVEGMQFDRGPLSPYFINNPDKQVAVL	14	Y	P
MUT_000263	Burk_A_13002-7_mAb_8E4-18E7	SingleMut	ELDVVEGMQFDRGALSPYFINNPDKQVAVL	14	Y	A
MUT_000264	Burk_A_13002-7_mAb_8E4-18E7	SingleMut	ELDVVEGMQFDRGQLSPYFINNPDKQVAVL	14	Y	Q
MUT_000265	Burk_A_13002-7_mAb_8E4-18E7	SingleMut	ELDVVEGMQFDRGKLSPYFINNPDKQVAVL	14	Y	K
MUT_000266	Burk_A_13002-7_mAb_8E4-18E7	SingleMut	ELDVVEGMQFDRGDLSPYFINNPDKQVAVL	14	Y	D
MUT_000267	Burk_A_13002-7_mAb_8E4-18E7	SingleMut	ELDVVEGMQFDRGYGSPYFINNPDKQVAVL	15	L	G
MUT_000268	Burk_A_13002-7_mAb_8E4-18E7	SingleMut	ELDVVEGMQFDRGYYSPYFINNPDKQVAVL	15	L	Y
MUT_000269	Burk_A_13002-7_mAb_8E4-18E7	SingleMut	ELDVVEGMQFDRGYTSPYFINNPDKQVAVL	15	L	T
MUT_000270	Burk_A_13002-7_mAb_8E4-18E7	SingleMut	ELDVVEGMQFDRGYSSPYFINNPDKQVAVL	15	L	S
MUT_000271	Burk_A_13002-7_mAb_8E4-18E7	SingleMut	ELDVVEGMQFDRGYRSPYFINNPDKQVAVL	15	L	R
MUT_000272	Burk_A_13002-7_mAb_8E4-18E7	SingleMut	ELDVVEGMQFDRGYESPYFINNPDKQVAVL	15	L	E
MUT_000273	Burk_A_13002-7_mAb_8E4-18E7	SingleMut	ELDVVEGMQFDRGYISPYFINNPDKQVAVL	15	L	I
MUT_000274	Burk_A_13002-7_mAb_8E4-18E7	SingleMut	ELDVVEGMQFDRGYHSPYFINNPDKQVAVL	15	L	H
MUT_000275	Burk_A_13002-7_mAb_8E4-18E7	SingleMut	ELDVVEGMQFDRGYVSPYFINNPDKQVAVL	15	L	V
MUT_000276	Burk_A_13002-7_mAb_8E4-18E7	SingleMut	ELDVVEGMQFDRGYFSPYFINNPDKQVAVL	15	L	F
MUT_000277	Burk_A_13002-7_mAb_8E4-18E7	SingleMut	ELDVVEGMQFDRGYMSPYFINNPDKQVAVL	15	L	M
MUT_000278	Burk_A_13002-7_mAb_8E4-18E7	SingleMut	ELDVVEGMQFDRGYNSPYFINNPDKQVAVL	15	L	N
MUT_000279	Burk_A_13002-7_mAb_8E4-18E7	SingleMut	ELDVVEGMQFDRGYCSPYFINNPDKQVAVL	15	L	C
MUT_000280	Burk_A_13002-7_mAb_8E4-18E7	SingleMut	ELDVVEGMQFDRGYWSPYFINNPDKQVAVL	15	L	W
MUT_000281	Burk_A_13002-7_mAb_8E4-18E7	SingleMut	ELDVVEGMQFDRGYPSPYFINNPDKQVAVL	15	L	P
MUT_000282	Burk_A_13002-7_mAb_8E4-18E7	SingleMut	ELDVVEGMQFDRGYASPYFINNPDKQVAVL	15	L	A
MUT_000283	Burk_A_13002-7_mAb_8E4-18E7	SingleMut	ELDVVEGMQFDRGYQSPYFINNPDKQVAVL	15	L	Q
MUT_000284	Burk_A_13002-7_mAb_8E4-18E7	SingleMut	ELDVVEGMQFDRGYKSPYFINNPDKQVAVL	15	L	K
MUT_000285	Burk_A_13002-7_mAb_8E4-18E7	SingleMut	ELDVVEGMQFDRGYDSPYFINNPDKQVAVL	15	L	D
MUT_000286	Burk_A_13002-7_mAb_8E4-18E7	SingleMut	ELDVVEGMQFDRGYLGPYFINNPDKQVAVL	16	S	G
MUT_000287	Burk_A_13002-7_mAb_8E4-18E7	SingleMut	ELDVVEGMQFDRGYLYPYFINNPDKQVAVL	16	S	Y
MUT_000288	Burk_A_13002-7_mAb_8E4-18E7	SingleMut	ELDVVEGMQFDRGYLTPYFINNPDKQVAVL	16	S	T
MUT_000289	Burk_A_13002-7_mAb_8E4-18E7	SingleMut	ELDVVEGMQFDRGYLRPYFINNPDKQVAVL	16	S	R
MUT_000290	Burk_A_13002-7_mAb_8E4-18E7	SingleMut	ELDVVEGMQFDRGYLEPYFINNPDKQVAVL	16	S	E
MUT_000291	Burk_A_13002-7_mAb_8E4-18E7	SingleMut	ELDVVEGMQFDRGYLIPYFINNPDKQVAVL	16	S	I
MUT_000292	Burk_A_13002-7_mAb_8E4-18E7	SingleMut	ELDVVEGMQFDRGYLHPYFINNPDKQVAVL	16	S	H
MUT_000293	Burk_A_13002-7_mAb_8E4-18E7	SingleMut	ELDVVEGMQFDRGYLLPYFINNPDKQVAVL	16	S	L
MUT_000294	Burk_A_13002-7_mAb_8E4-18E7	SingleMut	ELDVVEGMQFDRGYLVPYFINNPDKQVAVL	16	S	V
MUT_000295	Burk_A_13002-7_mAb_8E4-18E7	SingleMut	ELDVVEGMQFDRGYLFPYFINNPDKQVAVL	16	S	F
MUT_000296	Burk_A_13002-7_mAb_8E4-18E7	SingleMut	ELDVVEGMQFDRGYLMPYFINNPDKQVAVL	16	S	M
MUT_000297	Burk_A_13002-7_mAb_8E4-18E7	SingleMut	ELDVVEGMQFDRGYLNPYFINNPDKQVAVL	16	S	N
MUT_000298	Burk_A_13002-7_mAb_8E4-18E7	SingleMut	ELDVVEGMQFDRGYLCPYFINNPDKQVAVL	16	S	C
MUT_000299	Burk_A_13002-7_mAb_8E4-18E7	SingleMut	ELDVVEGMQFDRGYLWPYFINNPDKQVAVL	16	S	W
MUT_000300	Burk_A_13002-7_mAb_8E4-18E7	SingleMut	ELDVVEGMQFDRGYLPPYFINNPDKQVAVL	16	S	P
MUT_000301	Burk_A_13002-7_mAb_8E4-18E7	SingleMut	ELDVVEGMQFDRGYLAPYFINNPDKQVAVL	16	S	A
MUT_000302	Burk_A_13002-7_mAb_8E4-18E7	SingleMut	ELDVVEGMQFDRGYLQPYFINNPDKQVAVL	16	S	Q
MUT_000303	Burk_A_13002-7_mAb_8E4-18E7	SingleMut	ELDVVEGMQFDRGYLKPYFINNPDKQVAVL	16	S	K
MUT_000304	Burk_A_13002-7_mAb_8E4-18E7	SingleMut	ELDVVEGMQFDRGYLDPYFINNPDKQVAVL	16	S	D
MUT_000305	Burk_A_13002-7_mAb_8E4-18E7	SingleMut	ELDVVEGMQFDRGYLSGYFINNPDKQVAVL	17	P	G
MUT_000306	Burk_A_13002-7_mAb_8E4-18E7	SingleMut	ELDVVEGMQFDRGYLSYYFINNPDKQVAVL	17	P	Y
MUT_000307	Burk_A_13002-7_mAb_8E4-18E7	SingleMut	ELDVVEGMQFDRGYLSTYFINNPDKQVAVL	17	P	T
MUT_000308	Burk_A_13002-7_mAb_8E4-18E7	SingleMut	ELDVVEGMQFDRGYLSSYFINNPDKQVAVL	17	P	S
MUT_000309	Burk_A_13002-7_mAb_8E4-18E7	SingleMut	ELDVVEGMQFDRGYLSRYFINNPDKQVAVL	17	P	R
MUT_000310	Burk_A_13002-7_mAb_8E4-18E7	SingleMut	ELDVVEGMQFDRGYLSEYFINNPDKQVAVL	17	P	E
MUT_000311	Burk_A_13002-7_mAb_8E4-18E7	SingleMut	ELDVVEGMQFDRGYLSIYFINNPDKQVAVL	17	P	I
MUT_000312	Burk_A_13002-7_mAb_8E4-18E7	SingleMut	ELDVVEGMQFDRGYLSHYFINNPDKQVAVL	17	P	H
MUT_000313	Burk_A_13002-7_mAb_8E4-18E7	SingleMut	ELDVVEGMQFDRGYLSLYFINNPDKQVAVL	17	P	L
MUT_000314	Burk_A_13002-7_mAb_8E4-18E7	SingleMut	ELDVVEGMQFDRGYLSVYFINNPDKQVAVL	17	P	V
MUT_000315	Burk_A_13002-7_mAb_8E4-18E7	SingleMut	ELDVVEGMQFDRGYLSFYFINNPDKQVAVL	17	P	F
MUT_000316	Burk_A_13002-7_mAb_8E4-18E7	SingleMut	ELDVVEGMQFDRGYLSMYFINNPDKQVAVL	17	P	M
MUT_000317	Burk_A_13002-7_mAb_8E4-18E7	SingleMut	ELDVVEGMQFDRGYLSNYFINNPDKQVAVL	17	P	N
MUT_000318	Burk_A_13002-7_mAb_8E4-18E7	SingleMut	ELDVVEGMQFDRGYLSCYFINNPDKQVAVL	17	P	C
MUT_000319	Burk_A_13002-7_mAb_8E4-18E7	SingleMut	ELDVVEGMQFDRGYLSWYFINNPDKQVAVL	17	P	W
MUT_000320	Burk_A_13002-7_mAb_8E4-18E7	SingleMut	ELDVVEGMQFDRGYLSAYFINNPDKQVAVL	17	P	A
MUT_000321	Burk_A_13002-7_mAb_8E4-18E7	SingleMut	ELDVVEGMQFDRGYLSQYFINNPDKQVAVL	17	P	Q
MUT_000322	Burk_A_13002-7_mAb_8E4-18E7	SingleMut	ELDVVEGMQFDRGYLSKYFINNPDKQVAVL	17	P	K
MUT_000323	Burk_A_13002-7_mAb_8E4-18E7	SingleMut	ELDVVEGMQFDRGYLSDYFINNPDKQVAVL	17	P	D
MUT_000324	Burk_A_13002-7_mAb_8E4-18E7	SingleMut	ELDVVEGMQFDRGYLSPGFINNPDKQVAVL	18	Y	G
MUT_000325	Burk_A_13002-7_mAb_8E4-18E7	SingleMut	ELDVVEGMQFDRGYLSPTFINNPDKQVAVL	18	Y	T
MUT_000326	Burk_A_13002-7_mAb_8E4-18E7	SingleMut	ELDVVEGMQFDRGYLSPSFINNPDKQVAVL	18	Y	S
MUT_000327	Burk_A_13002-7_mAb_8E4-18E7	SingleMut	ELDVVEGMQFDRGYLSPRFINNPDKQVAVL	18	Y	R
MUT_000328	Burk_A_13002-7_mAb_8E4-18E7	SingleMut	ELDVVEGMQFDRGYLSPEFINNPDKQVAVL	18	Y	E
MUT_000329	Burk_A_13002-7_mAb_8E4-18E7	SingleMut	ELDVVEGMQFDRGYLSPIFINNPDKQVAVL	18	Y	I
MUT_000330	Burk_A_13002-7_mAb_8E4-18E7	SingleMut	ELDVVEGMQFDRGYLSPHFINNPDKQVAVL	18	Y	H
MUT_000331	Burk_A_13002-7_mAb_8E4-18E7	SingleMut	ELDVVEGMQFDRGYLSPLFINNPDKQVAVL	18	Y	L
MUT_000332	Burk_A_13002-7_mAb_8E4-18E7	SingleMut	ELDVVEGMQFDRGYLSPVFINNPDKQVAVL	18	Y	V
MUT_000333	Burk_A_13002-7_mAb_8E4-18E7	SingleMut	ELDVVEGMQFDRGYLSPFFINNPDKQVAVL	18	Y	F
MUT_000334	Burk_A_13002-7_mAb_8E4-18E7	SingleMut	ELDVVEGMQFDRGYLSPMFINNPDKQVAVL	18	Y	M
MUT_000335	Burk_A_13002-7_mAb_8E4-18E7	SingleMut	ELDVVEGMQFDRGYLSPNFINNPDKQVAVL	18	Y	N
MUT_000336	Burk_A_13002-7_mAb_8E4-18E7	SingleMut	ELDVVEGMQFDRGYLSPCFINNPDKQVAVL	18	Y	C
MUT_000337	Burk_A_13002-7_mAb_8E4-18E7	SingleMut	ELDVVEGMQFDRGYLSPWFINNPDKQVAVL	18	Y	W
MUT_000338	Burk_A_13002-7_mAb_8E4-18E7	SingleMut	ELDVVEGMQFDRGYLSPPFINNPDKQVAVL	18	Y	P
MUT_000339	Burk_A_13002-7_mAb_8E4-18E7	SingleMut	ELDVVEGMQFDRGYLSPAFINNPDKQVAVL	18	Y	A
MUT_000340	Burk_A_13002-7_mAb_8E4-18E7	SingleMut	ELDVVEGMQFDRGYLSPQFINNPDKQVAVL	18	Y	Q
MUT_000341	Burk_A_13002-7_mAb_8E4-18E7	SingleMut	ELDVVEGMQFDRGYLSPKFINNPDKQVAVL	18	Y	K
MUT_000342	Burk_A_13002-7_mAb_8E4-18E7	SingleMut	ELDVVEGMQFDRGYLSPDFINNPDKQVAVL	18	Y	D
MUT_000343	Burk_A_13002-7_mAb_8E4-18E7	SingleMut	ELDVVEGMQFDRGYLSPYGINNPDKQVAVL	19	F	G
MUT_000344	Burk_A_13002-7_mAb_8E4-18E7	SingleMut	ELDVVEGMQFDRGYLSPYYINNPDKQVAVL	19	F	Y
MUT_000345	Burk_A_13002-7_mAb_8E4-18E7	SingleMut	ELDVVEGMQFDRGYLSPYTINNPDKQVAVL	19	F	T
MUT_000346	Burk_A_13002-7_mAb_8E4-18E7	SingleMut	ELDVVEGMQFDRGYLSPYSINNPDKQVAVL	19	F	S
MUT_000347	Burk_A_13002-7_mAb_8E4-18E7	SingleMut	ELDVVEGMQFDRGYLSPYRINNPDKQVAVL	19	F	R
MUT_000348	Burk_A_13002-7_mAb_8E4-18E7	SingleMut	ELDVVEGMQFDRGYLSPYEINNPDKQVAVL	19	F	E
MUT_000349	Burk_A_13002-7_mAb_8E4-18E7	SingleMut	ELDVVEGMQFDRGYLSPYIINNPDKQVAVL	19	F	I
MUT_000350	Burk_A_13002-7_mAb_8E4-18E7	SingleMut	ELDVVEGMQFDRGYLSPYHINNPDKQVAVL	19	F	H
MUT_000351	Burk_A_13002-7_mAb_8E4-18E7	SingleMut	ELDVVEGMQFDRGYLSPYLINNPDKQVAVL	19	F	L
MUT_000352	Burk_A_13002-7_mAb_8E4-18E7	SingleMut	ELDVVEGMQFDRGYLSPYVINNPDKQVAVL	19	F	V
MUT_000353	Burk_A_13002-7_mAb_8E4-18E7	SingleMut	ELDVVEGMQFDRGYLSPYMINNPDKQVAVL	19	F	M
MUT_000354	Burk_A_13002-7_mAb_8E4-18E7	SingleMut	ELDVVEGMQFDRGYLSPYNINNPDKQVAVL	19	F	N
MUT_000355	Burk_A_13002-7_mAb_8E4-18E7	SingleMut	ELDVVEGMQFDRGYLSPYCINNPDKQVAVL	19	F	C
MUT_000356	Burk_A_13002-7_mAb_8E4-18E7	SingleMut	ELDVVEGMQFDRGYLSPYWINNPDKQVAVL	19	F	W
MUT_000357	Burk_A_13002-7_mAb_8E4-18E7	SingleMut	ELDVVEGMQFDRGYLSPYPINNPDKQVAVL	19	F	P
MUT_000358	Burk_A_13002-7_mAb_8E4-18E7	SingleMut	ELDVVEGMQFDRGYLSPYAINNPDKQVAVL	19	F	A
MUT_000359	Burk_A_13002-7_mAb_8E4-18E7	SingleMut	ELDVVEGMQFDRGYLSPYQINNPDKQVAVL	19	F	Q
MUT_000360	Burk_A_13002-7_mAb_8E4-18E7	SingleMut	ELDVVEGMQFDRGYLSPYKINNPDKQVAVL	19	F	K
MUT_000361	Burk_A_13002-7_mAb_8E4-18E7	SingleMut	ELDVVEGMQFDRGYLSPYDINNPDKQVAVL	19	F	D
MUT_000362	Burk_A_13002-7_mAb_8E4-18E7	SingleMut	ELDVVEGMQFDRGYLSPYFGNNPDKQVAVL	20	I	G
MUT_000363	Burk_A_13002-7_mAb_8E4-18E7	SingleMut	ELDVVEGMQFDRGYLSPYFYNNPDKQVAVL	20	I	Y
MUT_000364	Burk_A_13002-7_mAb_8E4-18E7	SingleMut	ELDVVEGMQFDRGYLSPYFTNNPDKQVAVL	20	I	T
MUT_000365	Burk_A_13002-7_mAb_8E4-18E7	SingleMut	ELDVVEGMQFDRGYLSPYFSNNPDKQVAVL	20	I	S
MUT_000366	Burk_A_13002-7_mAb_8E4-18E7	SingleMut	ELDVVEGMQFDRGYLSPYFRNNPDKQVAVL	20	I	R
MUT_000367	Burk_A_13002-7_mAb_8E4-18E7	SingleMut	ELDVVEGMQFDRGYLSPYFENNPDKQVAVL	20	I	E
MUT_000368	Burk_A_13002-7_mAb_8E4-18E7	SingleMut	ELDVVEGMQFDRGYLSPYFHNNPDKQVAVL	20	I	H
MUT_000369	Burk_A_13002-7_mAb_8E4-18E7	SingleMut	ELDVVEGMQFDRGYLSPYFLNNPDKQVAVL	20	I	L
MUT_000370	Burk_A_13002-7_mAb_8E4-18E7	SingleMut	ELDVVEGMQFDRGYLSPYFVNNPDKQVAVL	20	I	V
MUT_000371	Burk_A_13002-7_mAb_8E4-18E7	SingleMut	ELDVVEGMQFDRGYLSPYFFNNPDKQVAVL	20	I	F
MUT_000372	Burk_A_13002-7_mAb_8E4-18E7	SingleMut	ELDVVEGMQFDRGYLSPYFMNNPDKQVAVL	20	I	M
MUT_000373	Burk_A_13002-7_mAb_8E4-18E7	SingleMut	ELDVVEGMQFDRGYLSPYFNNNPDKQVAVL	20	I	N
MUT_000374	Burk_A_13002-7_mAb_8E4-18E7	SingleMut	ELDVVEGMQFDRGYLSPYFCNNPDKQVAVL	20	I	C
MUT_000375	Burk_A_13002-7_mAb_8E4-18E7	SingleMut	ELDVVEGMQFDRGYLSPYFWNNPDKQVAVL	20	I	W
MUT_000376	Burk_A_13002-7_mAb_8E4-18E7	SingleMut	ELDVVEGMQFDRGYLSPYFPNNPDKQVAVL	20	I	P
MUT_000377	Burk_A_13002-7_mAb_8E4-18E7	SingleMut	ELDVVEGMQFDRGYLSPYFANNPDKQVAVL	20	I	A
MUT_000378	Burk_A_13002-7_mAb_8E4-18E7	SingleMut	ELDVVEGMQFDRGYLSPYFQNNPDKQVAVL	20	I	Q
MUT_000379	Burk_A_13002-7_mAb_8E4-18E7	SingleMut	ELDVVEGMQFDRGYLSPYFKNNPDKQVAVL	20	I	K
MUT_000380	Burk_A_13002-7_mAb_8E4-18E7	SingleMut	ELDVVEGMQFDRGYLSPYFDNNPDKQVAVL	20	I	D
MUT_000381	Burk_A_13002-7_mAb_8E4-18E7	SingleMut	ELDVVEGMQFDRGYLSPYFIGNPDKQVAVL	21	N	G
MUT_000382	Burk_A_13002-7_mAb_8E4-18E7	SingleMut	ELDVVEGMQFDRGYLSPYFIYNPDKQVAVL	21	N	Y
MUT_000383	Burk_A_13002-7_mAb_8E4-18E7	SingleMut	ELDVVEGMQFDRGYLSPYFITNPDKQVAVL	21	N	T
MUT_000384	Burk_A_13002-7_mAb_8E4-18E7	SingleMut	ELDVVEGMQFDRGYLSPYFISNPDKQVAVL	21	N	S
MUT_000385	Burk_A_13002-7_mAb_8E4-18E7	SingleMut	ELDVVEGMQFDRGYLSPYFIRNPDKQVAVL	21	N	R
MUT_000386	Burk_A_13002-7_mAb_8E4-18E7	SingleMut	ELDVVEGMQFDRGYLSPYFIENPDKQVAVL	21	N	E
MUT_000387	Burk_A_13002-7_mAb_8E4-18E7	SingleMut	ELDVVEGMQFDRGYLSPYFIINPDKQVAVL	21	N	I
MUT_000388	Burk_A_13002-7_mAb_8E4-18E7	SingleMut	ELDVVEGMQFDRGYLSPYFIHNPDKQVAVL	21	N	H
MUT_000389	Burk_A_13002-7_mAb_8E4-18E7	SingleMut	ELDVVEGMQFDRGYLSPYFILNPDKQVAVL	21	N	L
MUT_000390	Burk_A_13002-7_mAb_8E4-18E7	SingleMut	ELDVVEGMQFDRGYLSPYFIVNPDKQVAVL	21	N	V
MUT_000391	Burk_A_13002-7_mAb_8E4-18E7	SingleMut	ELDVVEGMQFDRGYLSPYFIFNPDKQVAVL	21	N	F
MUT_000392	Burk_A_13002-7_mAb_8E4-18E7	SingleMut	ELDVVEGMQFDRGYLSPYFIMNPDKQVAVL	21	N	M
MUT_000393	Burk_A_13002-7_mAb_8E4-18E7	SingleMut	ELDVVEGMQFDRGYLSPYFICNPDKQVAVL	21	N	C
MUT_000394	Burk_A_13002-7_mAb_8E4-18E7	SingleMut	ELDVVEGMQFDRGYLSPYFIWNPDKQVAVL	21	N	W
MUT_000395	Burk_A_13002-7_mAb_8E4-18E7	SingleMut	ELDVVEGMQFDRGYLSPYFIPNPDKQVAVL	21	N	P
MUT_000396	Burk_A_13002-7_mAb_8E4-18E7	SingleMut	ELDVVEGMQFDRGYLSPYFIANPDKQVAVL	21	N	A
MUT_000397	Burk_A_13002-7_mAb_8E4-18E7	SingleMut	ELDVVEGMQFDRGYLSPYFIQNPDKQVAVL	21	N	Q
MUT_000398	Burk_A_13002-7_mAb_8E4-18E7	SingleMut	ELDVVEGMQFDRGYLSPYFIKNPDKQVAVL	21	N	K
MUT_000399	Burk_A_13002-7_mAb_8E4-18E7	SingleMut	ELDVVEGMQFDRGYLSPYFIDNPDKQVAVL	21	N	D
MUT_000400	Burk_A_13002-7_mAb_8E4-18E7	SingleMut	ELDVVEGMQFDRGYLSPYFINGPDKQVAVL	22	N	G
MUT_000401	Burk_A_13002-7_mAb_8E4-18E7	SingleMut	ELDVVEGMQFDRGYLSPYFINYPDKQVAVL	22	N	Y
MUT_000402	Burk_A_13002-7_mAb_8E4-18E7	SingleMut	ELDVVEGMQFDRGYLSPYFINTPDKQVAVL	22	N	T
MUT_000403	Burk_A_13002-7_mAb_8E4-18E7	SingleMut	ELDVVEGMQFDRGYLSPYFINSPDKQVAVL	22	N	S
MUT_000404	Burk_A_13002-7_mAb_8E4-18E7	SingleMut	ELDVVEGMQFDRGYLSPYFINRPDKQVAVL	22	N	R
MUT_000405	Burk_A_13002-7_mAb_8E4-18E7	SingleMut	ELDVVEGMQFDRGYLSPYFINEPDKQVAVL	22	N	E
MUT_000406	Burk_A_13002-7_mAb_8E4-18E7	SingleMut	ELDVVEGMQFDRGYLSPYFINIPDKQVAVL	22	N	I
MUT_000407	Burk_A_13002-7_mAb_8E4-18E7	SingleMut	ELDVVEGMQFDRGYLSPYFINHPDKQVAVL	22	N	H
MUT_000408	Burk_A_13002-7_mAb_8E4-18E7	SingleMut	ELDVVEGMQFDRGYLSPYFINLPDKQVAVL	22	N	L
MUT_000409	Burk_A_13002-7_mAb_8E4-18E7	SingleMut	ELDVVEGMQFDRGYLSPYFINVPDKQVAVL	22	N	V
MUT_000410	Burk_A_13002-7_mAb_8E4-18E7	SingleMut	ELDVVEGMQFDRGYLSPYFINFPDKQVAVL	22	N	F
MUT_000411	Burk_A_13002-7_mAb_8E4-18E7	SingleMut	ELDVVEGMQFDRGYLSPYFINMPDKQVAVL	22	N	M
MUT_000412	Burk_A_13002-7_mAb_8E4-18E7	SingleMut	ELDVVEGMQFDRGYLSPYFINCPDKQVAVL	22	N	C
MUT_000413	Burk_A_13002-7_mAb_8E4-18E7	SingleMut	ELDVVEGMQFDRGYLSPYFINWPDKQVAVL	22	N	W
MUT_000414	Burk_A_13002-7_mAb_8E4-18E7	SingleMut	ELDVVEGMQFDRGYLSPYFINPPDKQVAVL	22	N	P
MUT_000415	Burk_A_13002-7_mAb_8E4-18E7	SingleMut	ELDVVEGMQFDRGYLSPYFINAPDKQVAVL	22	N	A
MUT_000416	Burk_A_13002-7_mAb_8E4-18E7	SingleMut	ELDVVEGMQFDRGYLSPYFINQPDKQVAVL	22	N	Q
MUT_000417	Burk_A_13002-7_mAb_8E4-18E7	SingleMut	ELDVVEGMQFDRGYLSPYFINKPDKQVAVL	22	N	K
MUT_000418	Burk_A_13002-7_mAb_8E4-18E7	SingleMut	ELDVVEGMQFDRGYLSPYFINDPDKQVAVL	22	N	D
MUT_000419	Burk_A_13002-7_mAb_8E4-18E7	SingleMut	ELDVVEGMQFDRGYLSPYFINNGDKQVAVL	23	P	G
MUT_000420	Burk_A_13002-7_mAb_8E4-18E7	SingleMut	ELDVVEGMQFDRGYLSPYFINNYDKQVAVL	23	P	Y
MUT_000421	Burk_A_13002-7_mAb_8E4-18E7	SingleMut	ELDVVEGMQFDRGYLSPYFINNTDKQVAVL	23	P	T
MUT_000422	Burk_A_13002-7_mAb_8E4-18E7	SingleMut	ELDVVEGMQFDRGYLSPYFINNSDKQVAVL	23	P	S
MUT_000423	Burk_A_13002-7_mAb_8E4-18E7	SingleMut	ELDVVEGMQFDRGYLSPYFINNRDKQVAVL	23	P	R
MUT_000424	Burk_A_13002-7_mAb_8E4-18E7	SingleMut	ELDVVEGMQFDRGYLSPYFINNEDKQVAVL	23	P	E
MUT_000425	Burk_A_13002-7_mAb_8E4-18E7	SingleMut	ELDVVEGMQFDRGYLSPYFINNIDKQVAVL	23	P	I
MUT_000426	Burk_A_13002-7_mAb_8E4-18E7	SingleMut	ELDVVEGMQFDRGYLSPYFINNHDKQVAVL	23	P	H
MUT_000427	Burk_A_13002-7_mAb_8E4-18E7	SingleMut	ELDVVEGMQFDRGYLSPYFINNLDKQVAVL	23	P	L
MUT_000428	Burk_A_13002-7_mAb_8E4-18E7	SingleMut	ELDVVEGMQFDRGYLSPYFINNVDKQVAVL	23	P	V
MUT_000429	Burk_A_13002-7_mAb_8E4-18E7	SingleMut	ELDVVEGMQFDRGYLSPYFINNFDKQVAVL	23	P	F
MUT_000430	Burk_A_13002-7_mAb_8E4-18E7	SingleMut	ELDVVEGMQFDRGYLSPYFINNMDKQVAVL	23	P	M
MUT_000431	Burk_A_13002-7_mAb_8E4-18E7	SingleMut	ELDVVEGMQFDRGYLSPYFINNNDKQVAVL	23	P	N
MUT_000432	Burk_A_13002-7_mAb_8E4-18E7	SingleMut	ELDVVEGMQFDRGYLSPYFINNCDKQVAVL	23	P	C
MUT_000433	Burk_A_13002-7_mAb_8E4-18E7	SingleMut	ELDVVEGMQFDRGYLSPYFINNWDKQVAVL	23	P	W
MUT_000434	Burk_A_13002-7_mAb_8E4-18E7	SingleMut	ELDVVEGMQFDRGYLSPYFINNADKQVAVL	23	P	A
MUT_000435	Burk_A_13002-7_mAb_8E4-18E7	SingleMut	ELDVVEGMQFDRGYLSPYFINNQDKQVAVL	23	P	Q
MUT_000436	Burk_A_13002-7_mAb_8E4-18E7	SingleMut	ELDVVEGMQFDRGYLSPYFINNKDKQVAVL	23	P	K
MUT_000437	Burk_A_13002-7_mAb_8E4-18E7	SingleMut	ELDVVEGMQFDRGYLSPYFINNDDKQVAVL	23	P	D
MUT_000438	Burk_A_13002-7_mAb_8E4-18E7	SingleMut	ELDVVEGMQFDRGYLSPYFINNPGKQVAVL	24	D	G
MUT_000439	Burk_A_13002-7_mAb_8E4-18E7	SingleMut	ELDVVEGMQFDRGYLSPYFINNPYKQVAVL	24	D	Y
MUT_000440	Burk_A_13002-7_mAb_8E4-18E7	SingleMut	ELDVVEGMQFDRGYLSPYFINNPTKQVAVL	24	D	T
MUT_000441	Burk_A_13002-7_mAb_8E4-18E7	SingleMut	ELDVVEGMQFDRGYLSPYFINNPSKQVAVL	24	D	S
MUT_000442	Burk_A_13002-7_mAb_8E4-18E7	SingleMut	ELDVVEGMQFDRGYLSPYFINNPRKQVAVL	24	D	R
MUT_000443	Burk_A_13002-7_mAb_8E4-18E7	SingleMut	ELDVVEGMQFDRGYLSPYFINNPEKQVAVL	24	D	E
MUT_000444	Burk_A_13002-7_mAb_8E4-18E7	SingleMut	ELDVVEGMQFDRGYLSPYFINNPIKQVAVL	24	D	I
MUT_000445	Burk_A_13002-7_mAb_8E4-18E7	SingleMut	ELDVVEGMQFDRGYLSPYFINNPHKQVAVL	24	D	H
MUT_000446	Burk_A_13002-7_mAb_8E4-18E7	SingleMut	ELDVVEGMQFDRGYLSPYFINNPLKQVAVL	24	D	L
MUT_000447	Burk_A_13002-7_mAb_8E4-18E7	SingleMut	ELDVVEGMQFDRGYLSPYFINNPVKQVAVL	24	D	V
MUT_000448	Burk_A_13002-7_mAb_8E4-18E7	SingleMut	ELDVVEGMQFDRGYLSPYFINNPFKQVAVL	24	D	F
MUT_000449	Burk_A_13002-7_mAb_8E4-18E7	SingleMut	ELDVVEGMQFDRGYLSPYFINNPMKQVAVL	24	D	M
MUT_000450	Burk_A_13002-7_mAb_8E4-18E7	SingleMut	ELDVVEGMQFDRGYLSPYFINNPNKQVAVL	24	D	N
MUT_000451	Burk_A_13002-7_mAb_8E4-18E7	SingleMut	ELDVVEGMQFDRGYLSPYFINNPCKQVAVL	24	D	C
MUT_000452	Burk_A_13002-7_mAb_8E4-18E7	SingleMut	ELDVVEGMQFDRGYLSPYFINNPWKQVAVL	24	D	W
MUT_000453	Burk_A_13002-7_mAb_8E4-18E7	SingleMut	ELDVVEGMQFDRGYLSPYFINNPPKQVAVL	24	D	P
MUT_000454	Burk_A_13002-7_mAb_8E4-18E7	SingleMut	ELDVVEGMQFDRGYLSPYFINNPAKQVAVL	24	D	A
MUT_000455	Burk_A_13002-7_mAb_8E4-18E7	SingleMut	ELDVVEGMQFDRGYLSPYFINNPQKQVAVL	24	D	Q
MUT_000456	Burk_A_13002-7_mAb_8E4-18E7	SingleMut	ELDVVEGMQFDRGYLSPYFINNPKKQVAVL	24	D	K
MUT_000457	Burk_A_13002-7_mAb_8E4-18E7	SingleMut	ELDVVEGMQFDRGYLSPYFINNPDGQVAVL	25	K	G
MUT_000458	Burk_A_13002-7_mAb_8E4-18E7	SingleMut	ELDVVEGMQFDRGYLSPYFINNPDYQVAVL	25	K	Y
MUT_000459	Burk_A_13002-7_mAb_8E4-18E7	SingleMut	ELDVVEGMQFDRGYLSPYFINNPDTQVAVL	25	K	T
MUT_000460	Burk_A_13002-7_mAb_8E4-18E7	SingleMut	ELDVVEGMQFDRGYLSPYFINNPDSQVAVL	25	K	S
MUT_000461	Burk_A_13002-7_mAb_8E4-18E7	SingleMut	ELDVVEGMQFDRGYLSPYFINNPDRQVAVL	25	K	R
MUT_000462	Burk_A_13002-7_mAb_8E4-18E7	SingleMut	ELDVVEGMQFDRGYLSPYFINNPDEQVAVL	25	K	E
MUT_000463	Burk_A_13002-7_mAb_8E4-18E7	SingleMut	ELDVVEGMQFDRGYLSPYFINNPDIQVAVL	25	K	I
MUT_000464	Burk_A_13002-7_mAb_8E4-18E7	SingleMut	ELDVVEGMQFDRGYLSPYFINNPDHQVAVL	25	K	H
MUT_000465	Burk_A_13002-7_mAb_8E4-18E7	SingleMut	ELDVVEGMQFDRGYLSPYFINNPDLQVAVL	25	K	L
MUT_000466	Burk_A_13002-7_mAb_8E4-18E7	SingleMut	ELDVVEGMQFDRGYLSPYFINNPDVQVAVL	25	K	V
MUT_000467	Burk_A_13002-7_mAb_8E4-18E7	SingleMut	ELDVVEGMQFDRGYLSPYFINNPDFQVAVL	25	K	F
MUT_000468	Burk_A_13002-7_mAb_8E4-18E7	SingleMut	ELDVVEGMQFDRGYLSPYFINNPDMQVAVL	25	K	M
MUT_000469	Burk_A_13002-7_mAb_8E4-18E7	SingleMut	ELDVVEGMQFDRGYLSPYFINNPDNQVAVL	25	K	N
MUT_000470	Burk_A_13002-7_mAb_8E4-18E7	SingleMut	ELDVVEGMQFDRGYLSPYFINNPDCQVAVL	25	K	C
MUT_000471	Burk_A_13002-7_mAb_8E4-18E7	SingleMut	ELDVVEGMQFDRGYLSPYFINNPDWQVAVL	25	K	W
MUT_000472	Burk_A_13002-7_mAb_8E4-18E7	SingleMut	ELDVVEGMQFDRGYLSPYFINNPDPQVAVL	25	K	P
MUT_000473	Burk_A_13002-7_mAb_8E4-18E7	SingleMut	ELDVVEGMQFDRGYLSPYFINNPDAQVAVL	25	K	A
MUT_000474	Burk_A_13002-7_mAb_8E4-18E7	SingleMut	ELDVVEGMQFDRGYLSPYFINNPDQQVAVL	25	K	Q
MUT_000475	Burk_A_13002-7_mAb_8E4-18E7	SingleMut	ELDVVEGMQFDRGYLSPYFINNPDDQVAVL	25	K	D
MUT_000476	Burk_A_13002-7_mAb_8E4-18E7	SingleMut	ELDVVEGMQFDRGYLSPYFINNPDKGVAVL	26	Q	G
MUT_000477	Burk_A_13002-7_mAb_8E4-18E7	SingleMut	ELDVVEGMQFDRGYLSPYFINNPDKYVAVL	26	Q	Y
MUT_000478	Burk_A_13002-7_mAb_8E4-18E7	SingleMut	ELDVVEGMQFDRGYLSPYFINNPDKTVAVL	26	Q	T
MUT_000479	Burk_A_13002-7_mAb_8E4-18E7	SingleMut	ELDVVEGMQFDRGYLSPYFINNPDKSVAVL	26	Q	S
MUT_000480	Burk_A_13002-7_mAb_8E4-18E7	SingleMut	ELDVVEGMQFDRGYLSPYFINNPDKRVAVL	26	Q	R
MUT_000481	Burk_A_13002-7_mAb_8E4-18E7	SingleMut	ELDVVEGMQFDRGYLSPYFINNPDKEVAVL	26	Q	E
MUT_000482	Burk_A_13002-7_mAb_8E4-18E7	SingleMut	ELDVVEGMQFDRGYLSPYFINNPDKIVAVL	26	Q	I
MUT_000483	Burk_A_13002-7_mAb_8E4-18E7	SingleMut	ELDVVEGMQFDRGYLSPYFINNPDKHVAVL	26	Q	H
MUT_000484	Burk_A_13002-7_mAb_8E4-18E7	SingleMut	ELDVVEGMQFDRGYLSPYFINNPDKLVAVL	26	Q	L
MUT_000485	Burk_A_13002-7_mAb_8E4-18E7	SingleMut	ELDVVEGMQFDRGYLSPYFINNPDKVVAVL	26	Q	V
MUT_000486	Burk_A_13002-7_mAb_8E4-18E7	SingleMut	ELDVVEGMQFDRGYLSPYFINNPDKFVAVL	26	Q	F
MUT_000487	Burk_A_13002-7_mAb_8E4-18E7	SingleMut	ELDVVEGMQFDRGYLSPYFINNPDKMVAVL	26	Q	M
MUT_000488	Burk_A_13002-7_mAb_8E4-18E7	SingleMut	ELDVVEGMQFDRGYLSPYFINNPDKNVAVL	26	Q	N
MUT_000489	Burk_A_13002-7_mAb_8E4-18E7	SingleMut	ELDVVEGMQFDRGYLSPYFINNPDKCVAVL	26	Q	C
MUT_000490	Burk_A_13002-7_mAb_8E4-18E7	SingleMut	ELDVVEGMQFDRGYLSPYFINNPDKWVAVL	26	Q	W
MUT_000491	Burk_A_13002-7_mAb_8E4-18E7	SingleMut	ELDVVEGMQFDRGYLSPYFINNPDKPVAVL	26	Q	P
MUT_000492	Burk_A_13002-7_mAb_8E4-18E7	SingleMut	ELDVVEGMQFDRGYLSPYFINNPDKAVAVL	26	Q	A
MUT_000493	Burk_A_13002-7_mAb_8E4-18E7	SingleMut	ELDVVEGMQFDRGYLSPYFINNPDKKVAVL	26	Q	K
MUT_000494	Burk_A_13002-7_mAb_8E4-18E7	SingleMut	ELDVVEGMQFDRGYLSPYFINNPDKDVAVL	26	Q	D
MUT_000495	Burk_A_13002-7_mAb_8E4-18E7	SingleMut	ELDVVEGMQFDRGYLSPYFINNPDKQGAVL	27	V	G
MUT_000496	Burk_A_13002-7_mAb_8E4-18E7	SingleMut	ELDVVEGMQFDRGYLSPYFINNPDKQYAVL	27	V	Y
MUT_000497	Burk_A_13002-7_mAb_8E4-18E7	SingleMut	ELDVVEGMQFDRGYLSPYFINNPDKQTAVL	27	V	T
MUT_000498	Burk_A_13002-7_mAb_8E4-18E7	SingleMut	ELDVVEGMQFDRGYLSPYFINNPDKQSAVL	27	V	S
MUT_000499	Burk_A_13002-7_mAb_8E4-18E7	SingleMut	ELDVVEGMQFDRGYLSPYFINNPDKQRAVL	27	V	R
MUT_000500	Burk_A_13002-7_mAb_8E4-18E7	SingleMut	ELDVVEGMQFDRGYLSPYFINNPDKQEAVL	27	V	E
MUT_000501	Burk_A_13002-7_mAb_8E4-18E7	SingleMut	ELDVVEGMQFDRGYLSPYFINNPDKQIAVL	27	V	I
MUT_000502	Burk_A_13002-7_mAb_8E4-18E7	SingleMut	ELDVVEGMQFDRGYLSPYFINNPDKQHAVL	27	V	H
MUT_000503	Burk_A_13002-7_mAb_8E4-18E7	SingleMut	ELDVVEGMQFDRGYLSPYFINNPDKQLAVL	27	V	L
MUT_000504	Burk_A_13002-7_mAb_8E4-18E7	SingleMut	ELDVVEGMQFDRGYLSPYFINNPDKQFAVL	27	V	F
MUT_000505	Burk_A_13002-7_mAb_8E4-18E7	SingleMut	ELDVVEGMQFDRGYLSPYFINNPDKQMAVL	27	V	M
MUT_000506	Burk_A_13002-7_mAb_8E4-18E7	SingleMut	ELDVVEGMQFDRGYLSPYFINNPDKQNAVL	27	V	N
MUT_000507	Burk_A_13002-7_mAb_8E4-18E7	SingleMut	ELDVVEGMQFDRGYLSPYFINNPDKQCAVL	27	V	C
MUT_000508	Burk_A_13002-7_mAb_8E4-18E7	SingleMut	ELDVVEGMQFDRGYLSPYFINNPDKQWAVL	27	V	W
MUT_000509	Burk_A_13002-7_mAb_8E4-18E7	SingleMut	ELDVVEGMQFDRGYLSPYFINNPDKQPAVL	27	V	P
MUT_000510	Burk_A_13002-7_mAb_8E4-18E7	SingleMut	ELDVVEGMQFDRGYLSPYFINNPDKQAAVL	27	V	A
MUT_000511	Burk_A_13002-7_mAb_8E4-18E7	SingleMut	ELDVVEGMQFDRGYLSPYFINNPDKQQAVL	27	V	Q
MUT_000512	Burk_A_13002-7_mAb_8E4-18E7	SingleMut	ELDVVEGMQFDRGYLSPYFINNPDKQKAVL	27	V	K
MUT_000513	Burk_A_13002-7_mAb_8E4-18E7	SingleMut	ELDVVEGMQFDRGYLSPYFINNPDKQDAVL	27	V	D
MUT_000514	Burk_A_13002-7_mAb_8E4-18E7	SingleMut	ELDVVEGMQFDRGYLSPYFINNPDKQVGVL	28	A	G
MUT_000515	Burk_A_13002-7_mAb_8E4-18E7	SingleMut	ELDVVEGMQFDRGYLSPYFINNPDKQVYVL	28	A	Y
MUT_000516	Burk_A_13002-7_mAb_8E4-18E7	SingleMut	ELDVVEGMQFDRGYLSPYFINNPDKQVTVL	28	A	T
MUT_000517	Burk_A_13002-7_mAb_8E4-18E7	SingleMut	ELDVVEGMQFDRGYLSPYFINNPDKQVSVL	28	A	S
MUT_000518	Burk_A_13002-7_mAb_8E4-18E7	SingleMut	ELDVVEGMQFDRGYLSPYFINNPDKQVRVL	28	A	R
MUT_000519	Burk_A_13002-7_mAb_8E4-18E7	SingleMut	ELDVVEGMQFDRGYLSPYFINNPDKQVEVL	28	A	E
MUT_000520	Burk_A_13002-7_mAb_8E4-18E7	SingleMut	ELDVVEGMQFDRGYLSPYFINNPDKQVIVL	28	A	I
MUT_000521	Burk_A_13002-7_mAb_8E4-18E7	SingleMut	ELDVVEGMQFDRGYLSPYFINNPDKQVHVL	28	A	H
MUT_000522	Burk_A_13002-7_mAb_8E4-18E7	SingleMut	ELDVVEGMQFDRGYLSPYFINNPDKQVLVL	28	A	L
MUT_000523	Burk_A_13002-7_mAb_8E4-18E7	SingleMut	ELDVVEGMQFDRGYLSPYFINNPDKQVVVL	28	A	V
MUT_000524	Burk_A_13002-7_mAb_8E4-18E7	SingleMut	ELDVVEGMQFDRGYLSPYFINNPDKQVFVL	28	A	F
MUT_000525	Burk_A_13002-7_mAb_8E4-18E7	SingleMut	ELDVVEGMQFDRGYLSPYFINNPDKQVMVL	28	A	M
MUT_000526	Burk_A_13002-7_mAb_8E4-18E7	SingleMut	ELDVVEGMQFDRGYLSPYFINNPDKQVNVL	28	A	N
MUT_000527	Burk_A_13002-7_mAb_8E4-18E7	SingleMut	ELDVVEGMQFDRGYLSPYFINNPDKQVCVL	28	A	C
MUT_000528	Burk_A_13002-7_mAb_8E4-18E7	SingleMut	ELDVVEGMQFDRGYLSPYFINNPDKQVWVL	28	A	W
MUT_000529	Burk_A_13002-7_mAb_8E4-18E7	SingleMut	ELDVVEGMQFDRGYLSPYFINNPDKQVPVL	28	A	P
MUT_000530	Burk_A_13002-7_mAb_8E4-18E7	SingleMut	ELDVVEGMQFDRGYLSPYFINNPDKQVQVL	28	A	Q
MUT_000531	Burk_A_13002-7_mAb_8E4-18E7	SingleMut	ELDVVEGMQFDRGYLSPYFINNPDKQVKVL	28	A	K
MUT_000532	Burk_A_13002-7_mAb_8E4-18E7	SingleMut	ELDVVEGMQFDRGYLSPYFINNPDKQVDVL	28	A	D
MUT_000533	Burk_A_13002-7_mAb_8E4-18E7	SingleMut	ELDVVEGMQFDRGYLSPYFINNPDKQVAGL	29	V	G
MUT_000534	Burk_A_13002-7_mAb_8E4-18E7	SingleMut	ELDVVEGMQFDRGYLSPYFINNPDKQVAYL	29	V	Y
MUT_000535	Burk_A_13002-7_mAb_8E4-18E7	SingleMut	ELDVVEGMQFDRGYLSPYFINNPDKQVATL	29	V	T
MUT_000536	Burk_A_13002-7_mAb_8E4-18E7	SingleMut	ELDVVEGMQFDRGYLSPYFINNPDKQVASL	29	V	S
MUT_000537	Burk_A_13002-7_mAb_8E4-18E7	SingleMut	ELDVVEGMQFDRGYLSPYFINNPDKQVARL	29	V	R
MUT_000538	Burk_A_13002-7_mAb_8E4-18E7	SingleMut	ELDVVEGMQFDRGYLSPYFINNPDKQVAEL	29	V	E
MUT_000539	Burk_A_13002-7_mAb_8E4-18E7	SingleMut	ELDVVEGMQFDRGYLSPYFINNPDKQVAIL	29	V	I
MUT_000540	Burk_A_13002-7_mAb_8E4-18E7	SingleMut	ELDVVEGMQFDRGYLSPYFINNPDKQVAHL	29	V	H
MUT_000541	Burk_A_13002-7_mAb_8E4-18E7	SingleMut	ELDVVEGMQFDRGYLSPYFINNPDKQVALL	29	V	L
MUT_000542	Burk_A_13002-7_mAb_8E4-18E7	SingleMut	ELDVVEGMQFDRGYLSPYFINNPDKQVAFL	29	V	F
MUT_000543	Burk_A_13002-7_mAb_8E4-18E7	SingleMut	ELDVVEGMQFDRGYLSPYFINNPDKQVAML	29	V	M
MUT_000544	Burk_A_13002-7_mAb_8E4-18E7	SingleMut	ELDVVEGMQFDRGYLSPYFINNPDKQVANL	29	V	N
MUT_000545	Burk_A_13002-7_mAb_8E4-18E7	SingleMut	ELDVVEGMQFDRGYLSPYFINNPDKQVACL	29	V	C
MUT_000546	Burk_A_13002-7_mAb_8E4-18E7	SingleMut	ELDVVEGMQFDRGYLSPYFINNPDKQVAWL	29	V	W
MUT_000547	Burk_A_13002-7_mAb_8E4-18E7	SingleMut	ELDVVEGMQFDRGYLSPYFINNPDKQVAPL	29	V	P
MUT_000548	Burk_A_13002-7_mAb_8E4-18E7	SingleMut	ELDVVEGMQFDRGYLSPYFINNPDKQVAAL	29	V	A
MUT_000549	Burk_A_13002-7_mAb_8E4-18E7	SingleMut	ELDVVEGMQFDRGYLSPYFINNPDKQVAQL	29	V	Q
MUT_000550	Burk_A_13002-7_mAb_8E4-18E7	SingleMut	ELDVVEGMQFDRGYLSPYFINNPDKQVAKL	29	V	K
MUT_000551	Burk_A_13002-7_mAb_8E4-18E7	SingleMut	ELDVVEGMQFDRGYLSPYFINNPDKQVADL	29	V	D
MUT_000552	Burk_A_13002-7_mAb_8E4-18E7	SingleMut	ELDVVEGMQFDRGYLSPYFINNPDKQVAVG	30	L	G
MUT_000553	Burk_A_13002-7_mAb_8E4-18E7	SingleMut	ELDVVEGMQFDRGYLSPYFINNPDKQVAVY	30	L	Y
MUT_000554	Burk_A_13002-7_mAb_8E4-18E7	SingleMut	ELDVVEGMQFDRGYLSPYFINNPDKQVAVT	30	L	T
MUT_000555	Burk_A_13002-7_mAb_8E4-18E7	SingleMut	ELDVVEGMQFDRGYLSPYFINNPDKQVAVS	30	L	S
MUT_000556	Burk_A_13002-7_mAb_8E4-18E7	SingleMut	ELDVVEGMQFDRGYLSPYFINNPDKQVAVR	30	L	R
MUT_000557	Burk_A_13002-7_mAb_8E4-18E7	SingleMut	ELDVVEGMQFDRGYLSPYFINNPDKQVAVE	30	L	E
MUT_000558	Burk_A_13002-7_mAb_8E4-18E7	SingleMut	ELDVVEGMQFDRGYLSPYFINNPDKQVAVI	30	L	I
MUT_000559	Burk_A_13002-7_mAb_8E4-18E7	SingleMut	ELDVVEGMQFDRGYLSPYFINNPDKQVAVH	30	L	H
MUT_000560	Burk_A_13002-7_mAb_8E4-18E7	SingleMut	ELDVVEGMQFDRGYLSPYFINNPDKQVAVV	30	L	V
MUT_000561	Burk_A_13002-7_mAb_8E4-18E7	SingleMut	ELDVVEGMQFDRGYLSPYFINNPDKQVAVF	30	L	F
MUT_000562	Burk_A_13002-7_mAb_8E4-18E7	SingleMut	ELDVVEGMQFDRGYLSPYFINNPDKQVAVM	30	L	M
MUT_000563	Burk_A_13002-7_mAb_8E4-18E7	SingleMut	ELDVVEGMQFDRGYLSPYFINNPDKQVAVN	30	L	N
MUT_000564	Burk_A_13002-7_mAb_8E4-18E7	SingleMut	ELDVVEGMQFDRGYLSPYFINNPDKQVAVC	30	L	C
MUT_000565	Burk_A_13002-7_mAb_8E4-18E7	SingleMut	ELDVVEGMQFDRGYLSPYFINNPDKQVAVW	30	L	W
MUT_000566	Burk_A_13002-7_mAb_8E4-18E7	SingleMut	ELDVVEGMQFDRGYLSPYFINNPDKQVAVP	30	L	P
MUT_000567	Burk_A_13002-7_mAb_8E4-18E7	SingleMut	ELDVVEGMQFDRGYLSPYFINNPDKQVAVA	30	L	A
MUT_000568	Burk_A_13002-7_mAb_8E4-18E7	SingleMut	ELDVVEGMQFDRGYLSPYFINNPDKQVAVQ	30	L	Q
MUT_000569	Burk_A_13002-7_mAb_8E4-18E7	SingleMut	ELDVVEGMQFDRGYLSPYFINNPDKQVAVK	30	L	K
MUT_000570	Burk_A_13002-7_mAb_8E4-18E7	SingleMut	ELDVVEGMQFDRGYLSPYFINNPDKQVAVD	30	L	D
MUT_000571	Burk_A_13002-7_mAb_8E4-18E7	Slide	LDVVEGMQFDRGYLSPYFINNPDKQVAVLG				2	30
MUT_000572	Burk_A_13002-7_mAb_8E4-18E7	Slide	GELDVVEGMQFDRGYLSPYFINNPDKQVAV				1	29
MUT_000573	Burk_A_13002-7_mAb_8E4-18E7	Slide	DVVEGMQFDRGYLSPYFINNPDKQVAVLTT				3	30
MUT_000574	Burk_A_13002-7_mAb_8E4-18E7	Slide	GTELDVVEGMQFDRGYLSPYFINNPDKQVA				1	28
MUT_000575	Burk_A_13002-7_mAb_8E4-18E7	Slide	VVEGMQFDRGYLSPYFINNPDKQVAVLGST				4	30
MUT_000576	Burk_A_13002-7_mAb_8E4-18E7	Slide	GTSELDVVEGMQFDRGYLSPYFINNPDKQV				1	27
MUT_000577	Burk_A_13002-7_mAb_8E4-18E7	Slide	VEGMQFDRGYLSPYFINNPDKQVAVLGSSS				5	30
MUT_000578	Burk_A_13002-7_mAb_8E4-18E7	Slide	TTTAELDVVEGMQFDRGYLSPYFINNPDKQ				1	26
MUT_000579	Burk_A_13002-7_mAb_8E4-18E7	Slide	EGMQFDRGYLSPYFINNPDKQVAVLGGGTT				6	30
MUT_000580	Burk_A_13002-7_mAb_8E4-18E7	Slide	STSSAELDVVEGMQFDRGYLSPYFINNPDK				1	25
MUT_000581	Burk_A_13002-7_mAb_8E4-18E7	Slide	GMQFDRGYLSPYFINNPDKQVAVLGSSSGG				7	30
MUT_000582	Burk_A_13002-7_mAb_8E4-18E7	Slide	ASGGTTELDVVEGMQFDRGYLSPYFINNPD				1	24
MUT_000583	Burk_A_13002-7_mAb_8E4-18E7	Slide	MQFDRGYLSPYFINNPDKQVAVLGGASAGT				8	30
MUT_000584	Burk_A_13002-7_mAb_8E4-18E7	Slide	TSTTAGTELDVVEGMQFDRGYLSPYFINNP				1	23
MUT_000585	Burk_A_13002-7_mAb_8E4-18E7	Slide	QFDRGYLSPYFINNPDKQVAVLTTTTTSTG				9	30
MUT_000586	Burk_A_13002-7_mAb_8E4-18E7	Slide	GTTSTAGGELDVVEGMQFDRGYLSPYFINN				1	22
MUT_000587	Burk_A_13002-7_mAb_8E4-18E7	Slide	FDRGYLSPYFINNPDKQVAVLSSSGGTAGA				10	30
MUT_000588	Burk_A_13002-7_mAb_8E4-18E7	Slide	TATGAGGAGELDVVEGMQFDRGYLSPYFIN				1	21
MUT_000589	Burk_A_13002-7_mAb_8E4-18E7	Slide	DRGYLSPYFINNPDKQVAVLTGSSGSSSGA				11	30
MUT_000590	Burk_A_13002-7_mAb_8E4-18E7	Slide	GGAASGTSASELDVVEGMQFDRGYLSPYFI				1	20
MUT_000591	Burk_A_13002-7_mAb_8E4-18E7	Slide	RGYLSPYFINNPDKQVAVLSGSGAAAAGSG				12	30
MUT_000592	Burk_A_13002-7_mAb_8E4-18E7	Slide	ATTTGSTGGGAELDVVEGMQFDRGYLSPYF				1	19
MUT_000593	Burk_A_13002-7_mAb_8E4-18E7	Slide	GYLSPYFINNPDKQVAVLSATTATATGSAA				13	30
MUT_000594	Burk_A_13002-7_mAb_8E4-18E7	Slide	TAGAGTTSAGGGELDVVEGMQFDRGYLSPY				1	18
MUT_000595	Burk_A_13002-7_mAb_8E4-18E7	Slide	YLSPYFINNPDKQVAVLGSGSGTTAASAAS				14	30
MUT_000596	Burk_A_13002-7_mAb_8E4-18E7	Slide	TAGTATGTGSSSTELDVVEGMQFDRGYLSP				1	17
MUT_000597	Burk_A_13002-7_mAb_8E4-18E7	Slide	LSPYFINNPDKQVAVLGSGTSGATTSTTSS				15	30
MUT_000598	Burk_A_13002-7_mAb_8E4-18E7	Slide	STSAGGAASGGAASELDVVEGMQFDRGYLS				1	16
MUT_000599	Burk_A_13002-7_mAb_8E4-18E7	Slide	SPYFINNPDKQVAVLTSSTTSAGGSSSGAS				16	30
MUT_000600	Burk_A_13002-7_mAb_8E4-18E7	Slide	STTTTSTTSGGGGASELDVVEGMQFDRGYL				1	15
MUT_000601	Burk_A_13002-7_mAb_8E4-18E7	Slide	PYFINNPDKQVAVLSTSSATSSSGSATGAS				17	30
MUT_000602	Burk_A_13002-7_mAb_8E4-18E7	Slide	TGATTTTATTTSASSGELDVVEGMQFDRGY				1	14
MUT_000603	Burk_A_13002-7_mAb_8E4-18E7	Slide	YFINNPDKQVAVLSSSGTTAGTSGTAAGSA				18	30
MUT_000604	Burk_A_13002-7_mAb_8E4-18E7	Slide	ATTAAGGGSSSAGASTAELDVVEGMQFDRG				1	13
MUT_000605	Burk_A_13002-7_mAb_8E4-18E7	Slide	FINNPDKQVAVLSTGGSSAGSGGTGTTSGG				19	30
MUT_000606	Burk_A_13002-7_mAb_8E4-18E7	Slide	ATTASAGGSASAGSASTTELDVVEGMQFDR				1	12
MUT_000607	Burk_A_13002-7_mAb_8E4-18E7	Slide	INNPDKQVAVLGGTGTSSATTTTTSSAATT				20	30
MUT_000608	Burk_A_13002-7_mAb_8E4-18E7	Slide	GTSTTGSTSSTGGSASGAAELDVVEGMQFD				1	11
MUT_000609	Burk_A_13002-7_mAb_8E4-18E7	Slide	NNPDKQVAVLTAAASSGSGSGSATTTTAAG				21	30
MUT_000610	Burk_A_13002-7_mAb_8E4-18E7	Slide	ASASATAGAAASATATSTSTELDVVEGMQF				1	10
MUT_000611	Burk_A_13002-7_mAb_8E4-18E7	Slide	NPDKQVAVLTSGGTTSSGTSGSTATSTSTT				22	30
MUT_000612	Burk_A_13002-7_mAb_8E4-18E7	Slide	STSGTTAGAGASSAGSASGGAELDVVEGMQ				1	9
MUT_000613	Burk_A_13002-7_mAb_8E4-18E7	Slide	PDKQVAVLGGTSTTASSSGSSAGASASSGT				23	30
MUT_000614	Burk_A_13002-7_mAb_8E4-18E7	Slide	GATASGGAGGTASGTTGGSSSSELDVVEGM				1	8
MUT_000615	Burk_A_13002-7_mAb_8E4-18E7	Slide	DKQVAVLTAGSGTTGSGGGSSSGSGATTAT				24	30
MUT_000616	Burk_A_13002-7_mAb_8E4-18E7	Slide	GATASAAGSTTTTATTGAAGGASELDVVEG				1	7
MUT_000617	Burk_A_13002-7_mAb_8E4-18E7	Slide	KQVAVLTAGATTSGSSTGTTSATSASTTTA				25	30
MUT_000618	Burk_A_13002-7_mAb_8E4-18E7	Slide	AGTAATASSGSGATATASATAAGGELDVVE				1	6
MUT_000619	Burk_A_13002-7_mAb_8E4-18E7	Slide	QVAVLSSSAGSAGSSTGAGGTTASTSGGGS				26	30
MUT_000620	Burk_A_13002-7_mAb_8E4-18E7	Slide	STGTGTTGGATTTSSGSSSTGGTTSELDVV				1	5
MUT_000621	Burk_A_13081-7_mAb_7D10	Original	RVKQIRTQIEEATSDYDREKLQERVAKLAG
MUT_000622	Burk_A_13081-7_mAb_7D10	SingleMut	GVKQIRTQIEEATSDYDREKLQERVAKLAG	1	R	G
MUT_000623	Burk_A_13081-7_mAb_7D10	SingleMut	YVKQIRTQIEEATSDYDREKLQERVAKLAG	1	R	Y
MUT_000624	Burk_A_13081-7_mAb_7D10	SingleMut	TVKQIRTQIEEATSDYDREKLQERVAKLAG	1	R	T
MUT_000625	Burk_A_13081-7_mAb_7D10	SingleMut	SVKQIRTQIEEATSDYDREKLQERVAKLAG	1	R	S
MUT_000626	Burk_A_13081-7_mAb_7D10	SingleMut	EVKQIRTQIEEATSDYDREKLQERVAKLAG	1	R	E
MUT_000627	Burk_A_13081-7_mAb_7D10	SingleMut	IVKQIRTQIEEATSDYDREKLQERVAKLAG	1	R	I
MUT_000628	Burk_A_13081-7_mAb_7D10	SingleMut	HVKQIRTQIEEATSDYDREKLQERVAKLAG	1	R	H
MUT_000629	Burk_A_13081-7_mAb_7D10	SingleMut	LVKQIRTQIEEATSDYDREKLQERVAKLAG	1	R	L
MUT_000630	Burk_A_13081-7_mAb_7D10	SingleMut	VVKQIRTQIEEATSDYDREKLQERVAKLAG	1	R	V
MUT_000631	Burk_A_13081-7_mAb_7D10	SingleMut	FVKQIRTQIEEATSDYDREKLQERVAKLAG	1	R	F
MUT_000632	Burk_A_13081-7_mAb_7D10	SingleMut	MVKQIRTQIEEATSDYDREKLQERVAKLAG	1	R	M
MUT_000633	Burk_A_13081-7_mAb_7D10	SingleMut	NVKQIRTQIEEATSDYDREKLQERVAKLAG	1	R	N
MUT_000634	Burk_A_13081-7_mAb_7D10	SingleMut	CVKQIRTQIEEATSDYDREKLQERVAKLAG	1	R	C
MUT_000635	Burk_A_13081-7_mAb_7D10	SingleMut	WVKQIRTQIEEATSDYDREKLQERVAKLAG	1	R	W
MUT_000636	Burk_A_13081-7_mAb_7D10	SingleMut	PVKQIRTQIEEATSDYDREKLQERVAKLAG	1	R	P
MUT_000637	Burk_A_13081-7_mAb_7D10	SingleMut	AVKQIRTQIEEATSDYDREKLQERVAKLAG	1	R	A
MUT_000638	Burk_A_13081-7_mAb_7D10	SingleMut	QVKQIRTQIEEATSDYDREKLQERVAKLAG	1	R	Q
MUT_000639	Burk_A_13081-7_mAb_7D10	SingleMut	KVKQIRTQIEEATSDYDREKLQERVAKLAG	1	R	K
MUT_000640	Burk_A_13081-7_mAb_7D10	SingleMut	DVKQIRTQIEEATSDYDREKLQERVAKLAG	1	R	D
MUT_000641	Burk_A_13081-7_mAb_7D10	SingleMut	RGKQIRTQIEEATSDYDREKLQERVAKLAG	2	V	G
MUT_000642	Burk_A_13081-7_mAb_7D10	SingleMut	RYKQIRTQIEEATSDYDREKLQERVAKLAG	2	V	Y
MUT_000643	Burk_A_13081-7_mAb_7D10	SingleMut	RTKQIRTQIEEATSDYDREKLQERVAKLAG	2	V	T
MUT_000644	Burk_A_13081-7_mAb_7D10	SingleMut	RSKQIRTQIEEATSDYDREKLQERVAKLAG	2	V	S
MUT_000645	Burk_A_13081-7_mAb_7D10	SingleMut	RRKQIRTQIEEATSDYDREKLQERVAKLAG	2	V	R
MUT_000646	Burk_A_13081-7_mAb_7D10	SingleMut	REKQIRTQIEEATSDYDREKLQERVAKLAG	2	V	E
MUT_000647	Burk_A_13081-7_mAb_7D10	SingleMut	RIKQIRTQIEEATSDYDREKLQERVAKLAG	2	V	I
MUT_000648	Burk_A_13081-7_mAb_7D10	SingleMut	RHKQIRTQIEEATSDYDREKLQERVAKLAG	2	V	H
MUT_000649	Burk_A_13081-7_mAb_7D10	SingleMut	RLKQIRTQIEEATSDYDREKLQERVAKLAG	2	V	L
MUT_000650	Burk_A_13081-7_mAb_7D10	SingleMut	RFKQIRTQIEEATSDYDREKLQERVAKLAG	2	V	F
MUT_000651	Burk_A_13081-7_mAb_7D10	SingleMut	RMKQIRTQIEEATSDYDREKLQERVAKLAG	2	V	M
MUT_000652	Burk_A_13081-7_mAb_7D10	SingleMut	RNKQIRTQIEEATSDYDREKLQERVAKLAG	2	V	N
MUT_000653	Burk_A_13081-7_mAb_7D10	SingleMut	RCKQIRTQIEEATSDYDREKLQERVAKLAG	2	V	C
MUT_000654	Burk_A_13081-7_mAb_7D10	SingleMut	RWKQIRTQIEEATSDYDREKLQERVAKLAG	2	V	W
MUT_000655	Burk_A_13081-7_mAb_7D10	SingleMut	RPKQIRTQIEEATSDYDREKLQERVAKLAG	2	V	P
MUT_000656	Burk_A_13081-7_mAb_7D10	SingleMut	RAKQIRTQIEEATSDYDREKLQERVAKLAG	2	V	A
MUT_000657	Burk_A_13081-7_mAb_7D10	SingleMut	RQKQIRTQIEEATSDYDREKLQERVAKLAG	2	V	Q
MUT_000658	Burk_A_13081-7_mAb_7D10	SingleMut	RKKQIRTQIEEATSDYDREKLQERVAKLAG	2	V	K
MUT_000659	Burk_A_13081-7_mAb_7D10	SingleMut	RDKQIRTQIEEATSDYDREKLQERVAKLAG	2	V	D
MUT_000660	Burk_A_13081-7_mAb_7D10	SingleMut	RVGQIRTQIEEATSDYDREKLQERVAKLAG	3	K	G
MUT_000661	Burk_A_13081-7_mAb_7D10	SingleMut	RVYQIRTQIEEATSDYDREKLQERVAKLAG	3	K	Y
MUT_000662	Burk_A_13081-7_mAb_7D10	SingleMut	RVTQIRTQIEEATSDYDREKLQERVAKLAG	3	K	T
MUT_000663	Burk_A_13081-7_mAb_7D10	SingleMut	RVSQIRTQIEEATSDYDREKLQERVAKLAG	3	K	S
MUT_000664	Burk_A_13081-7_mAb_7D10	SingleMut	RVRQIRTQIEEATSDYDREKLQERVAKLAG	3	K	R
MUT_000665	Burk_A_13081-7_mAb_7D10	SingleMut	RVEQIRTQIEEATSDYDREKLQERVAKLAG	3	K	E
MUT_000666	Burk_A_13081-7_mAb_7D10	SingleMut	RVIQIRTQIEEATSDYDREKLQERVAKLAG	3	K	I
MUT_000667	Burk_A_13081-7_mAb_7D10	SingleMut	RVHQIRTQIEEATSDYDREKLQERVAKLAG	3	K	H
MUT_000668	Burk_A_13081-7_mAb_7D10	SingleMut	RVLQIRTQIEEATSDYDREKLQERVAKLAG	3	K	L
MUT_000669	Burk_A_13081-7_mAb_7D10	SingleMut	RVVQIRTQIEEATSDYDREKLQERVAKLAG	3	K	V
MUT_000670	Burk_A_13081-7_mAb_7D10	SingleMut	RVFQIRTQIEEATSDYDREKLQERVAKLAG	3	K	F
MUT_000671	Burk_A_13081-7_mAb_7D10	SingleMut	RVMQIRTQIEEATSDYDREKLQERVAKLAG	3	K	M
MUT_000672	Burk_A_13081-7_mAb_7D10	SingleMut	RVNQIRTQIEEATSDYDREKLQERVAKLAG	3	K	N
MUT_000673	Burk_A_13081-7_mAb_7D10	SingleMut	RVCQIRTQIEEATSDYDREKLQERVAKLAG	3	K	C
MUT_000674	Burk_A_13081-7_mAb_7D10	SingleMut	RVWQIRTQIEEATSDYDREKLQERVAKLAG	3	K	W
MUT_000675	Burk_A_13081-7_mAb_7D10	SingleMut	RVPQIRTQIEEATSDYDREKLQERVAKLAG	3	K	P
MUT_000676	Burk_A_13081-7_mAb_7D10	SingleMut	RVAQIRTQIEEATSDYDREKLQERVAKLAG	3	K	A
MUT_000677	Burk_A_13081-7_mAb_7D10	SingleMut	RVQQIRTQIEEATSDYDREKLQERVAKLAG	3	K	Q
MUT_000678	Burk_A_13081-7_mAb_7D10	SingleMut	RVDQIRTQIEEATSDYDREKLQERVAKLAG	3	K	D
MUT_000679	Burk_A_13081-7_mAb_7D10	SingleMut	RVKGIRTQIEEATSDYDREKLQERVAKLAG	4	Q	G
MUT_000680	Burk_A_13081-7_mAb_7D10	SingleMut	RVKYIRTQIEEATSDYDREKLQERVAKLAG	4	Q	Y
MUT_000681	Burk_A_13081-7_mAb_7D10	SingleMut	RVKTIRTQIEEATSDYDREKLQERVAKLAG	4	Q	T
MUT_000682	Burk_A_13081-7_mAb_7D10	SingleMut	RVKSIRTQIEEATSDYDREKLQERVAKLAG	4	Q	S
MUT_000683	Burk_A_13081-7_mAb_7D10	SingleMut	RVKRIRTQIEEATSDYDREKLQERVAKLAG	4	Q	R
MUT_000684	Burk_A_13081-7_mAb_7D10	SingleMut	RVKEIRTQIEEATSDYDREKLQERVAKLAG	4	Q	E
MUT_000685	Burk_A_13081-7_mAb_7D10	SingleMut	RVKIIRTQIEEATSDYDREKLQERVAKLAG	4	Q	I
MUT_000686	Burk_A_13081-7_mAb_7D10	SingleMut	RVKHIRTQIEEATSDYDREKLQERVAKLAG	4	Q	H
MUT_000687	Burk_A_13081-7_mAb_7D10	SingleMut	RVKLIRTQIEEATSDYDREKLQERVAKLAG	4	Q	L
MUT_000688	Burk_A_13081-7_mAb_7D10	SingleMut	RVKVIRTQIEEATSDYDREKLQERVAKLAG	4	Q	V
MUT_000689	Burk_A_13081-7_mAb_7D10	SingleMut	RVKFIRTQIEEATSDYDREKLQERVAKLAG	4	Q	F
MUT_000690	Burk_A_13081-7_mAb_7D10	SingleMut	RVKMIRTQIEEATSDYDREKLQERVAKLAG	4	Q	M
MUT_000691	Burk_A_13081-7_mAb_7D10	SingleMut	RVKNIRTQIEEATSDYDREKLQERVAKLAG	4	Q	N
MUT_000692	Burk_A_13081-7_mAb_7D10	SingleMut	RVKCIRTQIEEATSDYDREKLQERVAKLAG	4	Q	C
MUT_000693	Burk_A_13081-7_mAb_7D10	SingleMut	RVKWIRTQIEEATSDYDREKLQERVAKLAG	4	Q	W
MUT_000694	Burk_A_13081-7_mAb_7D10	SingleMut	RVKPIRTQIEEATSDYDREKLQERVAKLAG	4	Q	P
MUT_000695	Burk_A_13081-7_mAb_7D10	SingleMut	RVKAIRTQIEEATSDYDREKLQERVAKLAG	4	Q	A
MUT_000696	Burk_A_13081-7_mAb_7D10	SingleMut	RVKKIRTQIEEATSDYDREKLQERVAKLAG	4	Q	K
MUT_000697	Burk_A_13081-7_mAb_7D10	SingleMut	RVKDIRTQIEEATSDYDREKLQERVAKLAG	4	Q	D
MUT_000698	Burk_A_13081-7_mAb_7D10	SingleMut	RVKQGRTQIEEATSDYDREKLQERVAKLAG	5	I	G
MUT_000699	Burk_A_13081-7_mAb_7D10	SingleMut	RVKQYRTQIEEATSDYDREKLQERVAKLAG	5	I	Y
MUT_000700	Burk_A_13081-7_mAb_7D10	SingleMut	RVKQTRTQIEEATSDYDREKLQERVAKLAG	5	I	T
MUT_000701	Burk_A_13081-7_mAb_7D10	SingleMut	RVKQSRTQIEEATSDYDREKLQERVAKLAG	5	I	S
MUT_000702	Burk_A_13081-7_mAb_7D10	SingleMut	RVKQRRTQIEEATSDYDREKLQERVAKLAG	5	I	R
MUT_000703	Burk_A_13081-7_mAb_7D10	SingleMut	RVKQERTQIEEATSDYDREKLQERVAKLAG	5	I	E
MUT_000704	Burk_A_13081-7_mAb_7D10	SingleMut	RVKQHRTQIEEATSDYDREKLQERVAKLAG	5	I	H
MUT_000705	Burk_A_13081-7_mAb_7D10	SingleMut	RVKQLRTQIEEATSDYDREKLQERVAKLAG	5	I	L
MUT_000706	Burk_A_13081-7_mAb_7D10	SingleMut	RVKQVRTQIEEATSDYDREKLQERVAKLAG	5	I	V
MUT_000707	Burk_A_13081-7_mAb_7D10	SingleMut	RVKQFRTQIEEATSDYDREKLQERVAKLAG	5	I	F
MUT_000708	Burk_A_13081-7_mAb_7D10	SingleMut	RVKQMRTQIEEATSDYDREKLQERVAKLAG	5	I	M
MUT_000709	Burk_A_13081-7_mAb_7D10	SingleMut	RVKQNRTQIEEATSDYDREKLQERVAKLAG	5	I	N
MUT_000710	Burk_A_13081-7_mAb_7D10	SingleMut	RVKQCRTQIEEATSDYDREKLQERVAKLAG	5	I	C
MUT_000711	Burk_A_13081-7_mAb_7D10	SingleMut	RVKQWRTQIEEATSDYDREKLQERVAKLAG	5	I	W
MUT_000712	Burk_A_13081-7_mAb_7D10	SingleMut	RVKQPRTQIEEATSDYDREKLQERVAKLAG	5	I	P
MUT_000713	Burk_A_13081-7_mAb_7D10	SingleMut	RVKQARTQIEEATSDYDREKLQERVAKLAG	5	I	A
MUT_000714	Burk_A_13081-7_mAb_7D10	SingleMut	RVKQQRTQIEEATSDYDREKLQERVAKLAG	5	I	Q
MUT_000715	Burk_A_13081-7_mAb_7D10	SingleMut	RVKQKRTQIEEATSDYDREKLQERVAKLAG	5	I	K
MUT_000716	Burk_A_13081-7_mAb_7D10	SingleMut	RVKQDRTQIEEATSDYDREKLQERVAKLAG	5	I	D
MUT_000717	Burk_A_13081-7_mAb_7D10	SingleMut	RVKQIGTQIEEATSDYDREKLQERVAKLAG	6	R	G
MUT_000718	Burk_A_13081-7_mAb_7D10	SingleMut	RVKQIYTQIEEATSDYDREKLQERVAKLAG	6	R	Y
MUT_000719	Burk_A_13081-7_mAb_7D10	SingleMut	RVKQITTQIEEATSDYDREKLQERVAKLAG	6	R	T
MUT_000720	Burk_A_13081-7_mAb_7D10	SingleMut	RVKQISTQIEEATSDYDREKLQERVAKLAG	6	R	S
MUT_000721	Burk_A_13081-7_mAb_7D10	SingleMut	RVKQIETQIEEATSDYDREKLQERVAKLAG	6	R	E
MUT_000722	Burk_A_13081-7_mAb_7D10	SingleMut	RVKQIITQIEEATSDYDREKLQERVAKLAG	6	R	I
MUT_000723	Burk_A_13081-7_mAb_7D10	SingleMut	RVKQIHTQIEEATSDYDREKLQERVAKLAG	6	R	H
MUT_000724	Burk_A_13081-7_mAb_7D10	SingleMut	RVKQILTQIEEATSDYDREKLQERVAKLAG	6	R	L
MUT_000725	Burk_A_13081-7_mAb_7D10	SingleMut	RVKQIVTQIEEATSDYDREKLQERVAKLAG	6	R	V
MUT_000726	Burk_A_13081-7_mAb_7D10	SingleMut	RVKQIFTQIEEATSDYDREKLQERVAKLAG	6	R	F
MUT_000727	Burk_A_13081-7_mAb_7D10	SingleMut	RVKQIMTQIEEATSDYDREKLQERVAKLAG	6	R	M
MUT_000728	Burk_A_13081-7_mAb_7D10	SingleMut	RVKQINTQIEEATSDYDREKLQERVAKLAG	6	R	N
MUT_000729	Burk_A_13081-7_mAb_7D10	SingleMut	RVKQICTQIEEATSDYDREKLQERVAKLAG	6	R	C
MUT_000730	Burk_A_13081-7_mAb_7D10	SingleMut	RVKQIWTQIEEATSDYDREKLQERVAKLAG	6	R	W
MUT_000731	Burk_A_13081-7_mAb_7D10	SingleMut	RVKQIPTQIEEATSDYDREKLQERVAKLAG	6	R	P
MUT_000732	Burk_A_13081-7_mAb_7D10	SingleMut	RVKQIATQIEEATSDYDREKLQERVAKLAG	6	R	A
MUT_000733	Burk_A_13081-7_mAb_7D10	SingleMut	RVKQIQTQIEEATSDYDREKLQERVAKLAG	6	R	Q
MUT_000734	Burk_A_13081-7_mAb_7D10	SingleMut	RVKQIKTQIEEATSDYDREKLQERVAKLAG	6	R	K
MUT_000735	Burk_A_13081-7_mAb_7D10	SingleMut	RVKQIDTQIEEATSDYDREKLQERVAKLAG	6	R	D
MUT_000736	Burk_A_13081-7_mAb_7D10	SingleMut	RVKQIRGQIEEATSDYDREKLQERVAKLAG	7	T	G
MUT_000737	Burk_A_13081-7_mAb_7D10	SingleMut	RVKQIRYQIEEATSDYDREKLQERVAKLAG	7	T	Y
MUT_000738	Burk_A_13081-7_mAb_7D10	SingleMut	RVKQIRSQIEEATSDYDREKLQERVAKLAG	7	T	S
MUT_000739	Burk_A_13081-7_mAb_7D10	SingleMut	RVKQIRRQIEEATSDYDREKLQERVAKLAG	7	T	R
MUT_000740	Burk_A_13081-7_mAb_7D10	SingleMut	RVKQIREQIEEATSDYDREKLQERVAKLAG	7	T	E
MUT_000741	Burk_A_13081-7_mAb_7D10	SingleMut	RVKQIRIQIEEATSDYDREKLQERVAKLAG	7	T	I
MUT_000742	Burk_A_13081-7_mAb_7D10	SingleMut	RVKQIRHQIEEATSDYDREKLQERVAKLAG	7	T	H
MUT_000743	Burk_A_13081-7_mAb_7D10	SingleMut	RVKQIRLQIEEATSDYDREKLQERVAKLAG	7	T	L
MUT_000744	Burk_A_13081-7_mAb_7D10	SingleMut	RVKQIRVQIEEATSDYDREKLQERVAKLAG	7	T	V
MUT_000745	Burk_A_13081-7_mAb_7D10	SingleMut	RVKQIRFQIEEATSDYDREKLQERVAKLAG	7	T	F
MUT_000746	Burk_A_13081-7_mAb_7D10	SingleMut	RVKQIRMQIEEATSDYDREKLQERVAKLAG	7	T	M
MUT_000747	Burk_A_13081-7_mAb_7D10	SingleMut	RVKQIRNQIEEATSDYDREKLQERVAKLAG	7	T	N
MUT_000748	Burk_A_13081-7_mAb_7D10	SingleMut	RVKQIRCQIEEATSDYDREKLQERVAKLAG	7	T	C
MUT_000749	Burk_A_13081-7_mAb_7D10	SingleMut	RVKQIRWQIEEATSDYDREKLQERVAKLAG	7	T	W
MUT_000750	Burk_A_13081-7_mAb_7D10	SingleMut	RVKQIRPQIEEATSDYDREKLQERVAKLAG	7	T	P
MUT_000751	Burk_A_13081-7_mAb_7D10	SingleMut	RVKQIRAQIEEATSDYDREKLQERVAKLAG	7	T	A
MUT_000752	Burk_A_13081-7_mAb_7D10	SingleMut	RVKQIRQQIEEATSDYDREKLQERVAKLAG	7	T	Q
MUT_000753	Burk_A_13081-7_mAb_7D10	SingleMut	RVKQIRKQIEEATSDYDREKLQERVAKLAG	7	T	K
MUT_000754	Burk_A_13081-7_mAb_7D10	SingleMut	RVKQIRDQIEEATSDYDREKLQERVAKLAG	7	T	D
MUT_000755	Burk_A_13081-7_mAb_7D10	SingleMut	RVKQIRTGIEEATSDYDREKLQERVAKLAG	8	Q	G
MUT_000756	Burk_A_13081-7_mAb_7D10	SingleMut	RVKQIRTYIEEATSDYDREKLQERVAKLAG	8	Q	Y
MUT_000757	Burk_A_13081-7_mAb_7D10	SingleMut	RVKQIRTTIEEATSDYDREKLQERVAKLAG	8	Q	T
MUT_000758	Burk_A_13081-7_mAb_7D10	SingleMut	RVKQIRTSIEEATSDYDREKLQERVAKLAG	8	Q	S
MUT_000759	Burk_A_13081-7_mAb_7D10	SingleMut	RVKQIRTRIEEATSDYDREKLQERVAKLAG	8	Q	R
MUT_000760	Burk_A_13081-7_mAb_7D10	SingleMut	RVKQIRTEIEEATSDYDREKLQERVAKLAG	8	Q	E
MUT_000761	Burk_A_13081-7_mAb_7D10	SingleMut	RVKQIRTIIEEATSDYDREKLQERVAKLAG	8	Q	I
MUT_000762	Burk_A_13081-7_mAb_7D10	SingleMut	RVKQIRTHIEEATSDYDREKLQERVAKLAG	8	Q	H
MUT_000763	Burk_A_13081-7_mAb_7D10	SingleMut	RVKQIRTLIEEATSDYDREKLQERVAKLAG	8	Q	L
MUT_000764	Burk_A_13081-7_mAb_7D10	SingleMut	RVKQIRTVIEEATSDYDREKLQERVAKLAG	8	Q	V
MUT_000765	Burk_A_13081-7_mAb_7D10	SingleMut	RVKQIRTFIEEATSDYDREKLQERVAKLAG	8	Q	F
MUT_000766	Burk_A_13081-7_mAb_7D10	SingleMut	RVKQIRTMIEEATSDYDREKLQERVAKLAG	8	Q	M
MUT_000767	Burk_A_13081-7_mAb_7D10	SingleMut	RVKQIRTNIEEATSDYDREKLQERVAKLAG	8	Q	N
MUT_000768	Burk_A_13081-7_mAb_7D10	SingleMut	RVKQIRTCIEEATSDYDREKLQERVAKLAG	8	Q	C
MUT_000769	Burk_A_13081-7_mAb_7D10	SingleMut	RVKQIRTWIEEATSDYDREKLQERVAKLAG	8	Q	W
MUT_000770	Burk_A_13081-7_mAb_7D10	SingleMut	RVKQIRTPIEEATSDYDREKLQERVAKLAG	8	Q	P
MUT_000771	Burk_A_13081-7_mAb_7D10	SingleMut	RVKQIRTAIEEATSDYDREKLQERVAKLAG	8	Q	A
MUT_000772	Burk_A_13081-7_mAb_7D10	SingleMut	RVKQIRTKIEEATSDYDREKLQERVAKLAG	8	Q	K
MUT_000773	Burk_A_13081-7_mAb_7D10	SingleMut	RVKQIRTDIEEATSDYDREKLQERVAKLAG	8	Q	D
MUT_000774	Burk_A_13081-7_mAb_7D10	SingleMut	RVKQIRTQGEEATSDYDREKLQERVAKLAG	9	I	G
MUT_000775	Burk_A_13081-7_mAb_7D10	SingleMut	RVKQIRTQYEEATSDYDREKLQERVAKLAG	9	I	Y
MUT_000776	Burk_A_13081-7_mAb_7D10	SingleMut	RVKQIRTQTEEATSDYDREKLQERVAKLAG	9	I	T
MUT_000777	Burk_A_13081-7_mAb_7D10	SingleMut	RVKQIRTQSEEATSDYDREKLQERVAKLAG	9	I	S
MUT_000778	Burk_A_13081-7_mAb_7D10	SingleMut	RVKQIRTQREEATSDYDREKLQERVAKLAG	9	I	R
MUT_000779	Burk_A_13081-7_mAb_7D10	SingleMut	RVKQIRTQEEEATSDYDREKLQERVAKLAG	9	I	E
MUT_000780	Burk_A_13081-7_mAb_7D10	SingleMut	RVKQIRTQHEEATSDYDREKLQERVAKLAG	9	I	H
MUT_000781	Burk_A_13081-7_mAb_7D10	SingleMut	RVKQIRTQLEEATSDYDREKLQERVAKLAG	9	I	L
MUT_000782	Burk_A_13081-7_mAb_7D10	SingleMut	RVKQIRTQVEEATSDYDREKLQERVAKLAG	9	I	V
MUT_000783	Burk_A_13081-7_mAb_7D10	SingleMut	RVKQIRTQFEEATSDYDREKLQERVAKLAG	9	I	F
MUT_000784	Burk_A_13081-7_mAb_7D10	SingleMut	RVKQIRTQMEEATSDYDREKLQERVAKLAG	9	I	M
MUT_000785	Burk_A_13081-7_mAb_7D10	SingleMut	RVKQIRTQNEEATSDYDREKLQERVAKLAG	9	I	N
MUT_000786	Burk_A_13081-7_mAb_7D10	SingleMut	RVKQIRTQCEEATSDYDREKLQERVAKLAG	9	I	C
MUT_000787	Burk_A_13081-7_mAb_7D10	SingleMut	RVKQIRTQWEEATSDYDREKLQERVAKLAG	9	I	W
MUT_000788	Burk_A_13081-7_mAb_7D10	SingleMut	RVKQIRTQPEEATSDYDREKLQERVAKLAG	9	I	P
MUT_000789	Burk_A_13081-7_mAb_7D10	SingleMut	RVKQIRTQAEEATSDYDREKLQERVAKLAG	9	I	A
MUT_000790	Burk_A_13081-7_mAb_7D10	SingleMut	RVKQIRTQQEEATSDYDREKLQERVAKLAG	9	I	Q
MUT_000791	Burk_A_13081-7_mAb_7D10	SingleMut	RVKQIRTQKEEATSDYDREKLQERVAKLAG	9	I	K
MUT_000792	Burk_A_13081-7_mAb_7D10	SingleMut	RVKQIRTQDEEATSDYDREKLQERVAKLAG	9	I	D
MUT_000793	Burk_A_13081-7_mAb_7D10	SingleMut	RVKQIRTQIGEATSDYDREKLQERVAKLAG	10	E	G
MUT_000794	Burk_A_13081-7_mAb_7D10	SingleMut	RVKQIRTQIYEATSDYDREKLQERVAKLAG	10	E	Y
MUT_000795	Burk_A_13081-7_mAb_7D10	SingleMut	RVKQIRTQITEATSDYDREKLQERVAKLAG	10	E	T
MUT_000796	Burk_A_13081-7_mAb_7D10	SingleMut	RVKQIRTQISEATSDYDREKLQERVAKLAG	10	E	S
MUT_000797	Burk_A_13081-7_mAb_7D10	SingleMut	RVKQIRTQIREATSDYDREKLQERVAKLAG	10	E	R
MUT_000798	Burk_A_13081-7_mAb_7D10	SingleMut	RVKQIRTQIIEATSDYDREKLQERVAKLAG	10	E	I
MUT_000799	Burk_A_13081-7_mAb_7D10	SingleMut	RVKQIRTQIHEATSDYDREKLQERVAKLAG	10	E	H
MUT_000800	Burk_A_13081-7_mAb_7D10	SingleMut	RVKQIRTQILEATSDYDREKLQERVAKLAG	10	E	L
MUT_000801	Burk_A_13081-7_mAb_7D10	SingleMut	RVKQIRTQIVEATSDYDREKLQERVAKLAG	10	E	V
MUT_000802	Burk_A_13081-7_mAb_7D10	SingleMut	RVKQIRTQIFEATSDYDREKLQERVAKLAG	10	E	F
MUT_000803	Burk_A_13081-7_mAb_7D10	SingleMut	RVKQIRTQIMEATSDYDREKLQERVAKLAG	10	E	M
MUT_000804	Burk_A_13081-7_mAb_7D10	SingleMut	RVKQIRTQINEATSDYDREKLQERVAKLAG	10	E	N
MUT_000805	Burk_A_13081-7_mAb_7D10	SingleMut	RVKQIRTQICEATSDYDREKLQERVAKLAG	10	E	C
MUT_000806	Burk_A_13081-7_mAb_7D10	SingleMut	RVKQIRTQIWEATSDYDREKLQERVAKLAG	10	E	W
MUT_000807	Burk_A_13081-7_mAb_7D10	SingleMut	RVKQIRTQIPEATSDYDREKLQERVAKLAG	10	E	P
MUT_000808	Burk_A_13081-7_mAb_7D10	SingleMut	RVKQIRTQIAEATSDYDREKLQERVAKLAG	10	E	A
MUT_000809	Burk_A_13081-7_mAb_7D10	SingleMut	RVKQIRTQIQEATSDYDREKLQERVAKLAG	10	E	Q
MUT_000810	Burk_A_13081-7_mAb_7D10	SingleMut	RVKQIRTQIKEATSDYDREKLQERVAKLAG	10	E	K
MUT_000811	Burk_A_13081-7_mAb_7D10	SingleMut	RVKQIRTQIDEATSDYDREKLQERVAKLAG	10	E	D
MUT_000812	Burk_A_13081-7_mAb_7D10	SingleMut	RVKQIRTQIEGATSDYDREKLQERVAKLAG	11	E	G
MUT_000813	Burk_A_13081-7_mAb_7D10	SingleMut	RVKQIRTQIEYATSDYDREKLQERVAKLAG	11	E	Y
MUT_000814	Burk_A_13081-7_mAb_7D10	SingleMut	RVKQIRTQIETATSDYDREKLQERVAKLAG	11	E	T
MUT_000815	Burk_A_13081-7_mAb_7D10	SingleMut	RVKQIRTQIESATSDYDREKLQERVAKLAG	11	E	S
MUT_000816	Burk_A_13081-7_mAb_7D10	SingleMut	RVKQIRTQIERATSDYDREKLQERVAKLAG	11	E	R
MUT_000817	Burk_A_13081-7_mAb_7D10	SingleMut	RVKQIRTQIEIATSDYDREKLQERVAKLAG	11	E	I
MUT_000818	Burk_A_13081-7_mAb_7D10	SingleMut	RVKQIRTQIEHATSDYDREKLQERVAKLAG	11	E	H
MUT_000819	Burk_A_13081-7_mAb_7D10	SingleMut	RVKQIRTQIELATSDYDREKLQERVAKLAG	11	E	L
MUT_000820	Burk_A_13081-7_mAb_7D10	SingleMut	RVKQIRTQIEVATSDYDREKLQERVAKLAG	11	E	V
MUT_000821	Burk_A_13081-7_mAb_7D10	SingleMut	RVKQIRTQIEFATSDYDREKLQERVAKLAG	11	E	F
MUT_000822	Burk_A_13081-7_mAb_7D10	SingleMut	RVKQIRTQIEMATSDYDREKLQERVAKLAG	11	E	M
MUT_000823	Burk_A_13081-7_mAb_7D10	SingleMut	RVKQIRTQIENATSDYDREKLQERVAKLAG	11	E	N
MUT_000824	Burk_A_13081-7_mAb_7D10	SingleMut	RVKQIRTQIECATSDYDREKLQERVAKLAG	11	E	C
MUT_000825	Burk_A_13081-7_mAb_7D10	SingleMut	RVKQIRTQIEWATSDYDREKLQERVAKLAG	11	E	W
MUT_000826	Burk_A_13081-7_mAb_7D10	SingleMut	RVKQIRTQIEPATSDYDREKLQERVAKLAG	11	E	P
MUT_000827	Burk_A_13081-7_mAb_7D10	SingleMut	RVKQIRTQIEAATSDYDREKLQERVAKLAG	11	E	A
MUT_000828	Burk_A_13081-7_mAb_7D10	SingleMut	RVKQIRTQIEQATSDYDREKLQERVAKLAG	11	E	Q
MUT_000829	Burk_A_13081-7_mAb_7D10	SingleMut	RVKQIRTQIEKATSDYDREKLQERVAKLAG	11	E	K
MUT_000830	Burk_A_13081-7_mAb_7D10	SingleMut	RVKQIRTQIEDATSDYDREKLQERVAKLAG	11	E	D
MUT_000831	Burk_A_13081-7_mAb_7D10	SingleMut	RVKQIRTQIEEGTSDYDREKLQERVAKLAG	12	A	G
MUT_000832	Burk_A_13081-7_mAb_7D10	SingleMut	RVKQIRTQIEEYTSDYDREKLQERVAKLAG	12	A	Y
MUT_000833	Burk_A_13081-7_mAb_7D10	SingleMut	RVKQIRTQIEETTSDYDREKLQERVAKLAG	12	A	T
MUT_000834	Burk_A_13081-7_mAb_7D10	SingleMut	RVKQIRTQIEESTSDYDREKLQERVAKLAG	12	A	S
MUT_000835	Burk_A_13081-7_mAb_7D10	SingleMut	RVKQIRTQIEERTSDYDREKLQERVAKLAG	12	A	R
MUT_000836	Burk_A_13081-7_mAb_7D10	SingleMut	RVKQIRTQIEEETSDYDREKLQERVAKLAG	12	A	E
MUT_000837	Burk_A_13081-7_mAb_7D10	SingleMut	RVKQIRTQIEEITSDYDREKLQERVAKLAG	12	A	I
MUT_000838	Burk_A_13081-7_mAb_7D10	SingleMut	RVKQIRTQIEEHTSDYDREKLQERVAKLAG	12	A	H
MUT_000839	Burk_A_13081-7_mAb_7D10	SingleMut	RVKQIRTQIEELTSDYDREKLQERVAKLAG	12	A	L
MUT_000840	Burk_A_13081-7_mAb_7D10	SingleMut	RVKQIRTQIEEVTSDYDREKLQERVAKLAG	12	A	V
MUT_000841	Burk_A_13081-7_mAb_7D10	SingleMut	RVKQIRTQIEEFTSDYDREKLQERVAKLAG	12	A	F
MUT_000842	Burk_A_13081-7_mAb_7D10	SingleMut	RVKQIRTQIEEMTSDYDREKLQERVAKLAG	12	A	M
MUT_000843	Burk_A_13081-7_mAb_7D10	SingleMut	RVKQIRTQIEENTSDYDREKLQERVAKLAG	12	A	N
MUT_000844	Burk_A_13081-7_mAb_7D10	SingleMut	RVKQIRTQIEECTSDYDREKLQERVAKLAG	12	A	C
MUT_000845	Burk_A_13081-7_mAb_7D10	SingleMut	RVKQIRTQIEEWTSDYDREKLQERVAKLAG	12	A	W
MUT_000846	Burk_A_13081-7_mAb_7D10	SingleMut	RVKQIRTQIEEPTSDYDREKLQERVAKLAG	12	A	P
MUT_000847	Burk_A_13081-7_mAb_7D10	SingleMut	RVKQIRTQIEEQTSDYDREKLQERVAKLAG	12	A	Q
MUT_000848	Burk_A_13081-7_mAb_7D10	SingleMut	RVKQIRTQIEEKTSDYDREKLQERVAKLAG	12	A	K
MUT_000849	Burk_A_13081-7_mAb_7D10	SingleMut	RVKQIRTQIEEDTSDYDREKLQERVAKLAG	12	A	D
MUT_000850	Burk_A_13081-7_mAb_7D10	SingleMut	RVKQIRTQIEEAGSDYDREKLQERVAKLAG	13	T	G
MUT_000851	Burk_A_13081-7_mAb_7D10	SingleMut	RVKQIRTQIEEAYSDYDREKLQERVAKLAG	13	T	Y
MUT_000852	Burk_A_13081-7_mAb_7D10	SingleMut	RVKQIRTQIEEASSDYDREKLQERVAKLAG	13	T	S
MUT_000853	Burk_A_13081-7_mAb_7D10	SingleMut	RVKQIRTQIEEARSDYDREKLQERVAKLAG	13	T	R
MUT_000854	Burk_A_13081-7_mAb_7D10	SingleMut	RVKQIRTQIEEAESDYDREKLQERVAKLAG	13	T	E
MUT_000855	Burk_A_13081-7_mAb_7D10	SingleMut	RVKQIRTQIEEAISDYDREKLQERVAKLAG	13	T	I
MUT_000856	Burk_A_13081-7_mAb_7D10	SingleMut	RVKQIRTQIEEAHSDYDREKLQERVAKLAG	13	T	H
MUT_000857	Burk_A_13081-7_mAb_7D10	SingleMut	RVKQIRTQIEEALSDYDREKLQERVAKLAG	13	T	L
MUT_000858	Burk_A_13081-7_mAb_7D10	SingleMut	RVKQIRTQIEEAVSDYDREKLQERVAKLAG	13	T	V
MUT_000859	Burk_A_13081-7_mAb_7D10	SingleMut	RVKQIRTQIEEAFSDYDREKLQERVAKLAG	13	T	F
MUT_000860	Burk_A_13081-7_mAb_7D10	SingleMut	RVKQIRTQIEEAMSDYDREKLQERVAKLAG	13	T	M
MUT_000861	Burk_A_13081-7_mAb_7D10	SingleMut	RVKQIRTQIEEANSDYDREKLQERVAKLAG	13	T	N
MUT_000862	Burk_A_13081-7_mAb_7D10	SingleMut	RVKQIRTQIEEACSDYDREKLQERVAKLAG	13	T	C
MUT_000863	Burk_A_13081-7_mAb_7D10	SingleMut	RVKQIRTQIEEAWSDYDREKLQERVAKLAG	13	T	W
MUT_000864	Burk_A_13081-7_mAb_7D10	SingleMut	RVKQIRTQIEEAPSDYDREKLQERVAKLAG	13	T	P
MUT_000865	Burk_A_13081-7_mAb_7D10	SingleMut	RVKQIRTQIEEAASDYDREKLQERVAKLAG	13	T	A
MUT_000866	Burk_A_13081-7_mAb_7D10	SingleMut	RVKQIRTQIEEAQSDYDREKLQERVAKLAG	13	T	Q
MUT_000867	Burk_A_13081-7_mAb_7D10	SingleMut	RVKQIRTQIEEAKSDYDREKLQERVAKLAG	13	T	K
MUT_000868	Burk_A_13081-7_mAb_7D10	SingleMut	RVKQIRTQIEEADSDYDREKLQERVAKLAG	13	T	D
MUT_000869	Burk_A_13081-7_mAb_7D10	SingleMut	RVKQIRTQIEEATGDYDREKLQERVAKLAG	14	S	G
MUT_000870	Burk_A_13081-7_mAb_7D10	SingleMut	RVKQIRTQIEEATYDYDREKLQERVAKLAG	14	S	Y
MUT_000871	Burk_A_13081-7_mAb_7D10	SingleMut	RVKQIRTQIEEATTDYDREKLQERVAKLAG	14	S	T
MUT_000872	Burk_A_13081-7_mAb_7D10	SingleMut	RVKQIRTQIEEATRDYDREKLQERVAKLAG	14	S	R
MUT_000873	Burk_A_13081-7_mAb_7D10	SingleMut	RVKQIRTQIEEATEDYDREKLQERVAKLAG	14	S	E
MUT_000874	Burk_A_13081-7_mAb_7D10	SingleMut	RVKQIRTQIEEATIDYDREKLQERVAKLAG	14	S	I
MUT_000875	Burk_A_13081-7_mAb_7D10	SingleMut	RVKQIRTQIEEATHDYDREKLQERVAKLAG	14	S	H
MUT_000876	Burk_A_13081-7_mAb_7D10	SingleMut	RVKQIRTQIEEATLDYDREKLQERVAKLAG	14	S	L
MUT_000877	Burk_A_13081-7_mAb_7D10	SingleMut	RVKQIRTQIEEATVDYDREKLQERVAKLAG	14	S	V
MUT_000878	Burk_A_13081-7_mAb_7D10	SingleMut	RVKQIRTQIEEATFDYDREKLQERVAKLAG	14	S	F
MUT_000879	Burk_A_13081-7_mAb_7D10	SingleMut	RVKQIRTQIEEATMDYDREKLQERVAKLAG	14	S	M
MUT_000880	Burk_A_13081-7_mAb_7D10	SingleMut	RVKQIRTQIEEATNDYDREKLQERVAKLAG	14	S	N
MUT_000881	Burk_A_13081-7_mAb_7D10	SingleMut	RVKQIRTQIEEATCDYDREKLQERVAKLAG	14	S	C
MUT_000882	Burk_A_13081-7_mAb_7D10	SingleMut	RVKQIRTQIEEATWDYDREKLQERVAKLAG	14	S	W
MUT_000883	Burk_A_13081-7_mAb_7D10	SingleMut	RVKQIRTQIEEATPDYDREKLQERVAKLAG	14	S	P
MUT_000884	Burk_A_13081-7_mAb_7D10	SingleMut	RVKQIRTQIEEATADYDREKLQERVAKLAG	14	S	A
MUT_000885	Burk_A_13081-7_mAb_7D10	SingleMut	RVKQIRTQIEEATQDYDREKLQERVAKLAG	14	S	Q
MUT_000886	Burk_A_13081-7_mAb_7D10	SingleMut	RVKQIRTQIEEATKDYDREKLQERVAKLAG	14	S	K
MUT_000887	Burk_A_13081-7_mAb_7D10	SingleMut	RVKQIRTQIEEATDDYDREKLQERVAKLAG	14	S	D
MUT_000888	Burk_A_13081-7_mAb_7D10	SingleMut	RVKQIRTQIEEATSGYDREKLQERVAKLAG	15	D	G
MUT_000889	Burk_A_13081-7_mAb_7D10	SingleMut	RVKQIRTQIEEATSYYDREKLQERVAKLAG	15	D	Y
MUT_000890	Burk_A_13081-7_mAb_7D10	SingleMut	RVKQIRTQIEEATSTYDREKLQERVAKLAG	15	D	T
MUT_000891	Burk_A_13081-7_mAb_7D10	SingleMut	RVKQIRTQIEEATSSYDREKLQERVAKLAG	15	D	S
MUT_000892	Burk_A_13081-7_mAb_7D10	SingleMut	RVKQIRTQIEEATSRYDREKLQERVAKLAG	15	D	R
MUT_000893	Burk_A_13081-7_mAb_7D10	SingleMut	RVKQIRTQIEEATSEYDREKLQERVAKLAG	15	D	E
MUT_000894	Burk_A_13081-7_mAb_7D10	SingleMut	RVKQIRTQIEEATSIYDREKLQERVAKLAG	15	D	I
MUT_000895	Burk_A_13081-7_mAb_7D10	SingleMut	RVKQIRTQIEEATSHYDREKLQERVAKLAG	15	D	H
MUT_000896	Burk_A_13081-7_mAb_7D10	SingleMut	RVKQIRTQIEEATSLYDREKLQERVAKLAG	15	D	L
MUT_000897	Burk_A_13081-7_mAb_7D10	SingleMut	RVKQIRTQIEEATSVYDREKLQERVAKLAG	15	D	V
MUT_000898	Burk_A_13081-7_mAb_7D10	SingleMut	RVKQIRTQIEEATSFYDREKLQERVAKLAG	15	D	F
MUT_000899	Burk_A_13081-7_mAb_7D10	SingleMut	RVKQIRTQIEEATSMYDREKLQERVAKLAG	15	D	M
MUT_000900	Burk_A_13081-7_mAb_7D10	SingleMut	RVKQIRTQIEEATSNYDREKLQERVAKLAG	15	D	N
MUT_000901	Burk_A_13081-7_mAb_7D10	SingleMut	RVKQIRTQIEEATSCYDREKLQERVAKLAG	15	D	C
MUT_000902	Burk_A_13081-7_mAb_7D10	SingleMut	RVKQIRTQIEEATSWYDREKLQERVAKLAG	15	D	W
MUT_000903	Burk_A_13081-7_mAb_7D10	SingleMut	RVKQIRTQIEEATSPYDREKLQERVAKLAG	15	D	P
MUT_000904	Burk_A_13081-7_mAb_7D10	SingleMut	RVKQIRTQIEEATSAYDREKLQERVAKLAG	15	D	A
MUT_000905	Burk_A_13081-7_mAb_7D10	SingleMut	RVKQIRTQIEEATSQYDREKLQERVAKLAG	15	D	Q
MUT_000906	Burk_A_13081-7_mAb_7D10	SingleMut	RVKQIRTQIEEATSKYDREKLQERVAKLAG	15	D	K
MUT_000907	Burk_A_13081-7_mAb_7D10	SingleMut	RVKQIRTQIEEATSDGDREKLQERVAKLAG	16	Y	G
MUT_000908	Burk_A_13081-7_mAb_7D10	SingleMut	RVKQIRTQIEEATSDTDREKLQERVAKLAG	16	Y	T
MUT_000909	Burk_A_13081-7_mAb_7D10	SingleMut	RVKQIRTQIEEATSDSDREKLQERVAKLAG	16	Y	S
MUT_000910	Burk_A_13081-7_mAb_7D10	SingleMut	RVKQIRTQIEEATSDRDREKLQERVAKLAG	16	Y	R
MUT_000911	Burk_A_13081-7_mAb_7D10	SingleMut	RVKQIRTQIEEATSDEDREKLQERVAKLAG	16	Y	E
MUT_000912	Burk_A_13081-7_mAb_7D10	SingleMut	RVKQIRTQIEEATSDIDREKLQERVAKLAG	16	Y	I
MUT_000913	Burk_A_13081-7_mAb_7D10	SingleMut	RVKQIRTQIEEATSDHDREKLQERVAKLAG	16	Y	H
MUT_000914	Burk_A_13081-7_mAb_7D10	SingleMut	RVKQIRTQIEEATSDLDREKLQERVAKLAG	16	Y	L
MUT_000915	Burk_A_13081-7_mAb_7D10	SingleMut	RVKQIRTQIEEATSDVDREKLQERVAKLAG	16	Y	V
MUT_000916	Burk_A_13081-7_mAb_7D10	SingleMut	RVKQIRTQIEEATSDFDREKLQERVAKLAG	16	Y	F
MUT_000917	Burk_A_13081-7_mAb_7D10	SingleMut	RVKQIRTQIEEATSDMDREKLQERVAKLAG	16	Y	M
MUT_000918	Burk_A_13081-7_mAb_7D10	SingleMut	RVKQIRTQIEEATSDNDREKLQERVAKLAG	16	Y	N
MUT_000919	Burk_A_13081-7_mAb_7D10	SingleMut	RVKQIRTQIEEATSDCDREKLQERVAKLAG	16	Y	C
MUT_000920	Burk_A_13081-7_mAb_7D10	SingleMut	RVKQIRTQIEEATSDWDREKLQERVAKLAG	16	Y	W
MUT_000921	Burk_A_13081-7_mAb_7D10	SingleMut	RVKQIRTQIEEATSDPDREKLQERVAKLAG	16	Y	P
MUT_000922	Burk_A_13081-7_mAb_7D10	SingleMut	RVKQIRTQIEEATSDADREKLQERVAKLAG	16	Y	A
MUT_000923	Burk_A_13081-7_mAb_7D10	SingleMut	RVKQIRTQIEEATSDQDREKLQERVAKLAG	16	Y	Q
MUT_000924	Burk_A_13081-7_mAb_7D10	SingleMut	RVKQIRTQIEEATSDKDREKLQERVAKLAG	16	Y	K
MUT_000925	Burk_A_13081-7_mAb_7D10	SingleMut	RVKQIRTQIEEATSDDDREKLQERVAKLAG	16	Y	D
MUT_000926	Burk_A_13081-7_mAb_7D10	SingleMut	RVKQIRTQIEEATSDYGREKLQERVAKLAG	17	D	G
MUT_000927	Burk_A_13081-7_mAb_7D10	SingleMut	RVKQIRTQIEEATSDYYREKLQERVAKLAG	17	D	Y
MUT_000928	Burk_A_13081-7_mAb_7D10	SingleMut	RVKQIRTQIEEATSDYTREKLQERVAKLAG	17	D	T
MUT_000929	Burk_A_13081-7_mAb_7D10	SingleMut	RVKQIRTQIEEATSDYSREKLQERVAKLAG	17	D	S
MUT_000930	Burk_A_13081-7_mAb_7D10	SingleMut	RVKQIRTQIEEATSDYRREKLQERVAKLAG	17	D	R
MUT_000931	Burk_A_13081-7_mAb_7D10	SingleMut	RVKQIRTQIEEATSDYEREKLQERVAKLAG	17	D	E
MUT_000932	Burk_A_13081-7_mAb_7D10	SingleMut	RVKQIRTQIEEATSDYIREKLQERVAKLAG	17	D	I
MUT_000933	Burk_A_13081-7_mAb_7D10	SingleMut	RVKQIRTQIEEATSDYHREKLQERVAKLAG	17	D	H
MUT_000934	Burk_A_13081-7_mAb_7D10	SingleMut	RVKQIRTQIEEATSDYLREKLQERVAKLAG	17	D	L
MUT_000935	Burk_A_13081-7_mAb_7D10	SingleMut	RVKQIRTQIEEATSDYVREKLQERVAKLAG	17	D	V
MUT_000936	Burk_A_13081-7_mAb_7D10	SingleMut	RVKQIRTQIEEATSDYFREKLQERVAKLAG	17	D	F
MUT_000937	Burk_A_13081-7_mAb_7D10	SingleMut	RVKQIRTQIEEATSDYMREKLQERVAKLAG	17	D	M
MUT_000938	Burk_A_13081-7_mAb_7D10	SingleMut	RVKQIRTQIEEATSDYNREKLQERVAKLAG	17	D	N
MUT_000939	Burk_A_13081-7_mAb_7D10	SingleMut	RVKQIRTQIEEATSDYCREKLQERVAKLAG	17	D	C
MUT_000940	Burk_A_13081-7_mAb_7D10	SingleMut	RVKQIRTQIEEATSDYWREKLQERVAKLAG	17	D	W
MUT_000941	Burk_A_13081-7_mAb_7D10	SingleMut	RVKQIRTQIEEATSDYPREKLQERVAKLAG	17	D	P
MUT_000942	Burk_A_13081-7_mAb_7D10	SingleMut	RVKQIRTQIEEATSDYAREKLQERVAKLAG	17	D	A
MUT_000943	Burk_A_13081-7_mAb_7D10	SingleMut	RVKQIRTQIEEATSDYQREKLQERVAKLAG	17	D	Q
MUT_000944	Burk_A_13081-7_mAb_7D10	SingleMut	RVKQIRTQIEEATSDYKREKLQERVAKLAG	17	D	K
MUT_000945	Burk_A_13081-7_mAb_7D10	SingleMut	RVKQIRTQIEEATSDYDGEKLQERVAKLAG	18	R	G
MUT_000946	Burk_A_13081-7_mAb_7D10	SingleMut	RVKQIRTQIEEATSDYDYEKLQERVAKLAG	18	R	Y
MUT_000947	Burk_A_13081-7_mAb_7D10	SingleMut	RVKQIRTQIEEATSDYDTEKLQERVAKLAG	18	R	T
MUT_000948	Burk_A_13081-7_mAb_7D10	SingleMut	RVKQIRTQIEEATSDYDSEKLQERVAKLAG	18	R	S
MUT_000949	Burk_A_13081-7_mAb_7D10	SingleMut	RVKQIRTQIEEATSDYDEEKLQERVAKLAG	18	R	E
MUT_000950	Burk_A_13081-7_mAb_7D10	SingleMut	RVKQIRTQIEEATSDYDIEKLQERVAKLAG	18	R	I
MUT_000951	Burk_A_13081-7_mAb_7D10	SingleMut	RVKQIRTQIEEATSDYDHEKLQERVAKLAG	18	R	H
MUT_000952	Burk_A_13081-7_mAb_7D10	SingleMut	RVKQIRTQIEEATSDYDLEKLQERVAKLAG	18	R	L
MUT_000953	Burk_A_13081-7_mAb_7D10	SingleMut	RVKQIRTQIEEATSDYDVEKLQERVAKLAG	18	R	V
MUT_000954	Burk_A_13081-7_mAb_7D10	SingleMut	RVKQIRTQIEEATSDYDFEKLQERVAKLAG	18	R	F
MUT_000955	Burk_A_13081-7_mAb_7D10	SingleMut	RVKQIRTQIEEATSDYDMEKLQERVAKLAG	18	R	M
MUT_000956	Burk_A_13081-7_mAb_7D10	SingleMut	RVKQIRTQIEEATSDYDNEKLQERVAKLAG	18	R	N
MUT_000957	Burk_A_13081-7_mAb_7D10	SingleMut	RVKQIRTQIEEATSDYDCEKLQERVAKLAG	18	R	C
MUT_000958	Burk_A_13081-7_mAb_7D10	SingleMut	RVKQIRTQIEEATSDYDWEKLQERVAKLAG	18	R	W
MUT_000959	Burk_A_13081-7_mAb_7D10	SingleMut	RVKQIRTQIEEATSDYDPEKLQERVAKLAG	18	R	P
MUT_000960	Burk_A_13081-7_mAb_7D10	SingleMut	RVKQIRTQIEEATSDYDAEKLQERVAKLAG	18	R	A
MUT_000961	Burk_A_13081-7_mAb_7D10	SingleMut	RVKQIRTQIEEATSDYDQEKLQERVAKLAG	18	R	Q
MUT_000962	Burk_A_13081-7_mAb_7D10	SingleMut	RVKQIRTQIEEATSDYDKEKLQERVAKLAG	18	R	K
MUT_000963	Burk_A_13081-7_mAb_7D10	SingleMut	RVKQIRTQIEEATSDYDDEKLQERVAKLAG	18	R	D
MUT_000964	Burk_A_13081-7_mAb_7D10	SingleMut	RVKQIRTQIEEATSDYDRGKLQERVAKLAG	19	E	G
MUT_000965	Burk_A_13081-7_mAb_7D10	SingleMut	RVKQIRTQIEEATSDYDRYKLQERVAKLAG	19	E	Y
MUT_000966	Burk_A_13081-7_mAb_7D10	SingleMut	RVKQIRTQIEEATSDYDRTKLQERVAKLAG	19	E	T
MUT_000967	Burk_A_13081-7_mAb_7D10	SingleMut	RVKQIRTQIEEATSDYDRSKLQERVAKLAG	19	E	S
MUT_000968	Burk_A_13081-7_mAb_7D10	SingleMut	RVKQIRTQIEEATSDYDRRKLQERVAKLAG	19	E	R
MUT_000969	Burk_A_13081-7_mAb_7D10	SingleMut	RVKQIRTQIEEATSDYDRIKLQERVAKLAG	19	E	I
MUT_000970	Burk_A_13081-7_mAb_7D10	SingleMut	RVKQIRTQIEEATSDYDRHKLQERVAKLAG	19	E	H
MUT_000971	Burk_A_13081-7_mAb_7D10	SingleMut	RVKQIRTQIEEATSDYDRLKLQERVAKLAG	19	E	L
MUT_000972	Burk_A_13081-7_mAb_7D10	SingleMut	RVKQIRTQIEEATSDYDRVKLQERVAKLAG	19	E	V
MUT_000973	Burk_A_13081-7_mAb_7D10	SingleMut	RVKQIRTQIEEATSDYDRFKLQERVAKLAG	19	E	F
MUT_000974	Burk_A_13081-7_mAb_7D10	SingleMut	RVKQIRTQIEEATSDYDRMKLQERVAKLAG	19	E	M
MUT_000975	Burk_A_13081-7_mAb_7D10	SingleMut	RVKQIRTQIEEATSDYDRNKLQERVAKLAG	19	E	N
MUT_000976	Burk_A_13081-7_mAb_7D10	SingleMut	RVKQIRTQIEEATSDYDRCKLQERVAKLAG	19	E	C
MUT_000977	Burk_A_13081-7_mAb_7D10	SingleMut	RVKQIRTQIEEATSDYDRWKLQERVAKLAG	19	E	W
MUT_000978	Burk_A_13081-7_mAb_7D10	SingleMut	RVKQIRTQIEEATSDYDRPKLQERVAKLAG	19	E	P
MUT_000979	Burk_A_13081-7_mAb_7D10	SingleMut	RVKQIRTQIEEATSDYDRAKLQERVAKLAG	19	E	A
MUT_000980	Burk_A_13081-7_mAb_7D10	SingleMut	RVKQIRTQIEEATSDYDRQKLQERVAKLAG	19	E	Q
MUT_000981	Burk_A_13081-7_mAb_7D10	SingleMut	RVKQIRTQIEEATSDYDRKKLQERVAKLAG	19	E	K
MUT_000982	Burk_A_13081-7_mAb_7D10	SingleMut	RVKQIRTQIEEATSDYDRDKLQERVAKLAG	19	E	D
MUT_000983	Burk_A_13081-7_mAb_7D10	SingleMut	RVKQIRTQIEEATSDYDREGLQERVAKLAG	20	K	G
MUT_000984	Burk_A_13081-7_mAb_7D10	SingleMut	RVKQIRTQIEEATSDYDREYLQERVAKLAG	20	K	Y
MUT_000985	Burk_A_13081-7_mAb_7D10	SingleMut	RVKQIRTQIEEATSDYDRETLQERVAKLAG	20	K	T
MUT_000986	Burk_A_13081-7_mAb_7D10	SingleMut	RVKQIRTQIEEATSDYDRESLQERVAKLAG	20	K	S
MUT_000987	Burk_A_13081-7_mAb_7D10	SingleMut	RVKQIRTQIEEATSDYDRERLQERVAKLAG	20	K	R
MUT_000988	Burk_A_13081-7_mAb_7D10	SingleMut	RVKQIRTQIEEATSDYDREELQERVAKLAG	20	K	E
MUT_000989	Burk_A_13081-7_mAb_7D10	SingleMut	RVKQIRTQIEEATSDYDREILQERVAKLAG	20	K	I
MUT_000990	Burk_A_13081-7_mAb_7D10	SingleMut	RVKQIRTQIEEATSDYDREHLQERVAKLAG	20	K	H
MUT_000991	Burk_A_13081-7_mAb_7D10	SingleMut	RVKQIRTQIEEATSDYDRELLQERVAKLAG	20	K	L
MUT_000992	Burk_A_13081-7_mAb_7D10	SingleMut	RVKQIRTQIEEATSDYDREVLQERVAKLAG	20	K	V
MUT_000993	Burk_A_13081-7_mAb_7D10	SingleMut	RVKQIRTQIEEATSDYDREFLQERVAKLAG	20	K	F
MUT_000994	Burk_A_13081-7_mAb_7D10	SingleMut	RVKQIRTQIEEATSDYDREMLQERVAKLAG	20	K	M
MUT_000995	Burk_A_13081-7_mAb_7D10	SingleMut	RVKQIRTQIEEATSDYDRENLQERVAKLAG	20	K	N
MUT_000996	Burk_A_13081-7_mAb_7D10	SingleMut	RVKQIRTQIEEATSDYDRECLQERVAKLAG	20	K	C
MUT_000997	Burk_A_13081-7_mAb_7D10	SingleMut	RVKQIRTQIEEATSDYDREWLQERVAKLAG	20	K	W
MUT_000998	Burk_A_13081-7_mAb_7D10	SingleMut	RVKQIRTQIEEATSDYDREPLQERVAKLAG	20	K	P
MUT_000999	Burk_A_13081-7_mAb_7D10	SingleMut	RVKQIRTQIEEATSDYDREALQERVAKLAG	20	K	A
MUT_001000	Burk_A_13081-7_mAb_7D10	SingleMut	RVKQIRTQIEEATSDYDREQLQERVAKLAG	20	K	Q
MUT_001001	Burk_A_13081-7_mAb_7D10	SingleMut	RVKQIRTQIEEATSDYDREDLQERVAKLAG	20	K	D
MUT_001002	Burk_A_13081-7_mAb_7D10	SingleMut	RVKQIRTQIEEATSDYDREKGQERVAKLAG	21	L	G
MUT_001003	Burk_A_13081-7_mAb_7D10	SingleMut	RVKQIRTQIEEATSDYDREKYQERVAKLAG	21	L	Y
MUT_001004	Burk_A_13081-7_mAb_7D10	SingleMut	RVKQIRTQIEEATSDYDREKTQERVAKLAG	21	L	T
MUT_001005	Burk_A_13081-7_mAb_7D10	SingleMut	RVKQIRTQIEEATSDYDREKSQERVAKLAG	21	L	S
MUT_001006	Burk_A_13081-7_mAb_7D10	SingleMut	RVKQIRTQIEEATSDYDREKRQERVAKLAG	21	L	R
MUT_001007	Burk_A_13081-7_mAb_7D10	SingleMut	RVKQIRTQIEEATSDYDREKEQERVAKLAG	21	L	E
MUT_001008	Burk_A_13081-7_mAb_7D10	SingleMut	RVKQIRTQIEEATSDYDREKIQERVAKLAG	21	L	I
MUT_001009	Burk_A_13081-7_mAb_7D10	SingleMut	RVKQIRTQIEEATSDYDREKHQERVAKLAG	21	L	H
MUT_001010	Burk_A_13081-7_mAb_7D10	SingleMut	RVKQIRTQIEEATSDYDREKVQERVAKLAG	21	L	V
MUT_001011	Burk_A_13081-7_mAb_7D10	SingleMut	RVKQIRTQIEEATSDYDREKFQERVAKLAG	21	L	F
MUT_001012	Burk_A_13081-7_mAb_7D10	SingleMut	RVKQIRTQIEEATSDYDREKMQERVAKLAG	21	L	M
MUT_001013	Burk_A_13081-7_mAb_7D10	SingleMut	RVKQIRTQIEEATSDYDREKNQERVAKLAG	21	L	N
MUT_001014	Burk_A_13081-7_mAb_7D10	SingleMut	RVKQIRTQIEEATSDYDREKCQERVAKLAG	21	L	C
MUT_001015	Burk_A_13081-7_mAb_7D10	SingleMut	RVKQIRTQIEEATSDYDREKWQERVAKLAG	21	L	W
MUT_001016	Burk_A_13081-7_mAb_7D10	SingleMut	RVKQIRTQIEEATSDYDREKPQERVAKLAG	21	L	P
MUT_001017	Burk_A_13081-7_mAb_7D10	SingleMut	RVKQIRTQIEEATSDYDREKAQERVAKLAG	21	L	A
MUT_001018	Burk_A_13081-7_mAb_7D10	SingleMut	RVKQIRTQIEEATSDYDREKQQERVAKLAG	21	L	Q
MUT_001019	Burk_A_13081-7_mAb_7D10	SingleMut	RVKQIRTQIEEATSDYDREKKQERVAKLAG	21	L	K
MUT_001020	Burk_A_13081-7_mAb_7D10	SingleMut	RVKQIRTQIEEATSDYDREKDQERVAKLAG	21	L	D
MUT_001021	Burk_A_13081-7_mAb_7D10	SingleMut	RVKQIRTQIEEATSDYDREKLGERVAKLAG	22	Q	G
MUT_001022	Burk_A_13081-7_mAb_7D10	SingleMut	RVKQIRTQIEEATSDYDREKLYERVAKLAG	22	Q	Y
MUT_001023	Burk_A_13081-7_mAb_7D10	SingleMut	RVKQIRTQIEEATSDYDREKLTERVAKLAG	22	Q	T
MUT_001024	Burk_A_13081-7_mAb_7D10	SingleMut	RVKQIRTQIEEATSDYDREKLSERVAKLAG	22	Q	S
MUT_001025	Burk_A_13081-7_mAb_7D10	SingleMut	RVKQIRTQIEEATSDYDREKLRERVAKLAG	22	Q	R
MUT_001026	Burk_A_13081-7_mAb_7D10	SingleMut	RVKQIRTQIEEATSDYDREKLEERVAKLAG	22	Q	E
MUT_001027	Burk_A_13081-7_mAb_7D10	SingleMut	RVKQIRTQIEEATSDYDREKLIERVAKLAG	22	Q	I
MUT_001028	Burk_A_13081-7_mAb_7D10	SingleMut	RVKQIRTQIEEATSDYDREKLHERVAKLAG	22	Q	H
MUT_001029	Burk_A_13081-7_mAb_7D10	SingleMut	RVKQIRTQIEEATSDYDREKLLERVAKLAG	22	Q	L
MUT_001030	Burk_A_13081-7_mAb_7D10	SingleMut	RVKQIRTQIEEATSDYDREKLVERVAKLAG	22	Q	V
MUT_001031	Burk_A_13081-7_mAb_7D10	SingleMut	RVKQIRTQIEEATSDYDREKLFERVAKLAG	22	Q	F
MUT_001032	Burk_A_13081-7_mAb_7D10	SingleMut	RVKQIRTQIEEATSDYDREKLMERVAKLAG	22	Q	M
MUT_001033	Burk_A_13081-7_mAb_7D10	SingleMut	RVKQIRTQIEEATSDYDREKLNERVAKLAG	22	Q	N
MUT_001034	Burk_A_13081-7_mAb_7D10	SingleMut	RVKQIRTQIEEATSDYDREKLCERVAKLAG	22	Q	C
MUT_001035	Burk_A_13081-7_mAb_7D10	SingleMut	RVKQIRTQIEEATSDYDREKLWERVAKLAG	22	Q	W
MUT_001036	Burk_A_13081-7_mAb_7D10	SingleMut	RVKQIRTQIEEATSDYDREKLPERVAKLAG	22	Q	P
MUT_001037	Burk_A_13081-7_mAb_7D10	SingleMut	RVKQIRTQIEEATSDYDREKLAERVAKLAG	22	Q	A
MUT_001038	Burk_A_13081-7_mAb_7D10	SingleMut	RVKQIRTQIEEATSDYDREKLKERVAKLAG	22	Q	K
MUT_001039	Burk_A_13081-7_mAb_7D10	SingleMut	RVKQIRTQIEEATSDYDREKLDERVAKLAG	22	Q	D
MUT_001040	Burk_A_13081-7_mAb_7D10	SingleMut	RVKQIRTQIEEATSDYDREKLQGRVAKLAG	23	E	G
MUT_001041	Burk_A_13081-7_mAb_7D10	SingleMut	RVKQIRTQIEEATSDYDREKLQYRVAKLAG	23	E	Y
MUT_001042	Burk_A_13081-7_mAb_7D10	SingleMut	RVKQIRTQIEEATSDYDREKLQTRVAKLAG	23	E	T
MUT_001043	Burk_A_13081-7_mAb_7D10	SingleMut	RVKQIRTQIEEATSDYDREKLQSRVAKLAG	23	E	S
MUT_001044	Burk_A_13081-7_mAb_7D10	SingleMut	RVKQIRTQIEEATSDYDREKLQRRVAKLAG	23	E	R
MUT_001045	Burk_A_13081-7_mAb_7D10	SingleMut	RVKQIRTQIEEATSDYDREKLQIRVAKLAG	23	E	I
MUT_001046	Burk_A_13081-7_mAb_7D10	SingleMut	RVKQIRTQIEEATSDYDREKLQHRVAKLAG	23	E	H
MUT_001047	Burk_A_13081-7_mAb_7D10	SingleMut	RVKQIRTQIEEATSDYDREKLQLRVAKLAG	23	E	L
MUT_001048	Burk_A_13081-7_mAb_7D10	SingleMut	RVKQIRTQIEEATSDYDREKLQVRVAKLAG	23	E	V
MUT_001049	Burk_A_13081-7_mAb_7D10	SingleMut	RVKQIRTQIEEATSDYDREKLQFRVAKLAG	23	E	F
MUT_001050	Burk_A_13081-7_mAb_7D10	SingleMut	RVKQIRTQIEEATSDYDREKLQMRVAKLAG	23	E	M
MUT_001051	Burk_A_13081-7_mAb_7D10	SingleMut	RVKQIRTQIEEATSDYDREKLQNRVAKLAG	23	E	N
MUT_001052	Burk_A_13081-7_mAb_7D10	SingleMut	RVKQIRTQIEEATSDYDREKLQCRVAKLAG	23	E	C
MUT_001053	Burk_A_13081-7_mAb_7D10	SingleMut	RVKQIRTQIEEATSDYDREKLQWRVAKLAG	23	E	W
MUT_001054	Burk_A_13081-7_mAb_7D10	SingleMut	RVKQIRTQIEEATSDYDREKLQPRVAKLAG	23	E	P
MUT_001055	Burk_A_13081-7_mAb_7D10	SingleMut	RVKQIRTQIEEATSDYDREKLQARVAKLAG	23	E	A
MUT_001056	Burk_A_13081-7_mAb_7D10	SingleMut	RVKQIRTQIEEATSDYDREKLQQRVAKLAG	23	E	Q
MUT_001057	Burk_A_13081-7_mAb_7D10	SingleMut	RVKQIRTQIEEATSDYDREKLQKRVAKLAG	23	E	K
MUT_001058	Burk_A_13081-7_mAb_7D10	SingleMut	RVKQIRTQIEEATSDYDREKLQDRVAKLAG	23	E	D
MUT_001059	Burk_A_13081-7_mAb_7D10	SingleMut	RVKQIRTQIEEATSDYDREKLQEGVAKLAG	24	R	G
MUT_001060	Burk_A_13081-7_mAb_7D10	SingleMut	RVKQIRTQIEEATSDYDREKLQEYVAKLAG	24	R	Y
MUT_001061	Burk_A_13081-7_mAb_7D10	SingleMut	RVKQIRTQIEEATSDYDREKLQETVAKLAG	24	R	T
MUT_001062	Burk_A_13081-7_mAb_7D10	SingleMut	RVKQIRTQIEEATSDYDREKLQESVAKLAG	24	R	S
MUT_001063	Burk_A_13081-7_mAb_7D10	SingleMut	RVKQIRTQIEEATSDYDREKLQEEVAKLAG	24	R	E
MUT_001064	Burk_A_13081-7_mAb_7D10	SingleMut	RVKQIRTQIEEATSDYDREKLQEIVAKLAG	24	R	I
MUT_001065	Burk_A_13081-7_mAb_7D10	SingleMut	RVKQIRTQIEEATSDYDREKLQEHVAKLAG	24	R	H
MUT_001066	Burk_A_13081-7_mAb_7D10	SingleMut	RVKQIRTQIEEATSDYDREKLQELVAKLAG	24	R	L
MUT_001067	Burk_A_13081-7_mAb_7D10	SingleMut	RVKQIRTQIEEATSDYDREKLQEVVAKLAG	24	R	V
MUT_001068	Burk_A_13081-7_mAb_7D10	SingleMut	RVKQIRTQIEEATSDYDREKLQEFVAKLAG	24	R	F
MUT_001069	Burk_A_13081-7_mAb_7D10	SingleMut	RVKQIRTQIEEATSDYDREKLQEMVAKLAG	24	R	M
MUT_001070	Burk_A_13081-7_mAb_7D10	SingleMut	RVKQIRTQIEEATSDYDREKLQENVAKLAG	24	R	N
MUT_001071	Burk_A_13081-7_mAb_7D10	SingleMut	RVKQIRTQIEEATSDYDREKLQECVAKLAG	24	R	C
MUT_001072	Burk_A_13081-7_mAb_7D10	SingleMut	RVKQIRTQIEEATSDYDREKLQEWVAKLAG	24	R	W
MUT_001073	Burk_A_13081-7_mAb_7D10	SingleMut	RVKQIRTQIEEATSDYDREKLQEPVAKLAG	24	R	P
MUT_001074	Burk_A_13081-7_mAb_7D10	SingleMut	RVKQIRTQIEEATSDYDREKLQEAVAKLAG	24	R	A
MUT_001075	Burk_A_13081-7_mAb_7D10	SingleMut	RVKQIRTQIEEATSDYDREKLQEQVAKLAG	24	R	Q
MUT_001076	Burk_A_13081-7_mAb_7D10	SingleMut	RVKQIRTQIEEATSDYDREKLQEKVAKLAG	24	R	K
MUT_001077	Burk_A_13081-7_mAb_7D10	SingleMut	RVKQIRTQIEEATSDYDREKLQEDVAKLAG	24	R	D
MUT_001078	Burk_A_13081-7_mAb_7D10	SingleMut	RVKQIRTQIEEATSDYDREKLQERGAKLAG	25	V	G
MUT_001079	Burk_A_13081-7_mAb_7D10	SingleMut	RVKQIRTQIEEATSDYDREKLQERYAKLAG	25	V	Y
MUT_001080	Burk_A_13081-7_mAb_7D10	SingleMut	RVKQIRTQIEEATSDYDREKLQERTAKLAG	25	V	T
MUT_001081	Burk_A_13081-7_mAb_7D10	SingleMut	RVKQIRTQIEEATSDYDREKLQERSAKLAG	25	V	S
MUT_001082	Burk_A_13081-7_mAb_7D10	SingleMut	RVKQIRTQIEEATSDYDREKLQERRAKLAG	25	V	R
MUT_001083	Burk_A_13081-7_mAb_7D10	SingleMut	RVKQIRTQIEEATSDYDREKLQEREAKLAG	25	V	E
MUT_001084	Burk_A_13081-7_mAb_7D10	SingleMut	RVKQIRTQIEEATSDYDREKLQERIAKLAG	25	V	I
MUT_001085	Burk_A_13081-7_mAb_7D10	SingleMut	RVKQIRTQIEEATSDYDREKLQERHAKLAG	25	V	H
MUT_001086	Burk_A_13081-7_mAb_7D10	SingleMut	RVKQIRTQIEEATSDYDREKLQERLAKLAG	25	V	L
MUT_001087	Burk_A_13081-7_mAb_7D10	SingleMut	RVKQIRTQIEEATSDYDREKLQERFAKLAG	25	V	F
MUT_001088	Burk_A_13081-7_mAb_7D10	SingleMut	RVKQIRTQIEEATSDYDREKLQERMAKLAG	25	V	M
MUT_001089	Burk_A_13081-7_mAb_7D10	SingleMut	RVKQIRTQIEEATSDYDREKLQERNAKLAG	25	V	N
MUT_001090	Burk_A_13081-7_mAb_7D10	SingleMut	RVKQIRTQIEEATSDYDREKLQERCAKLAG	25	V	C
MUT_001091	Burk_A_13081-7_mAb_7D10	SingleMut	RVKQIRTQIEEATSDYDREKLQERWAKLAG	25	V	W
MUT_001092	Burk_A_13081-7_mAb_7D10	SingleMut	RVKQIRTQIEEATSDYDREKLQERPAKLAG	25	V	P
MUT_001093	Burk_A_13081-7_mAb_7D10	SingleMut	RVKQIRTQIEEATSDYDREKLQERAAKLAG	25	V	A
MUT_001094	Burk_A_13081-7_mAb_7D10	SingleMut	RVKQIRTQIEEATSDYDREKLQERQAKLAG	25	V	Q
MUT_001095	Burk_A_13081-7_mAb_7D10	SingleMut	RVKQIRTQIEEATSDYDREKLQERKAKLAG	25	V	K
MUT_001096	Burk_A_13081-7_mAb_7D10	SingleMut	RVKQIRTQIEEATSDYDREKLQERDAKLAG	25	V	D
MUT_001097	Burk_A_13081-7_mAb_7D10	SingleMut	RVKQIRTQIEEATSDYDREKLQERVGKLAG	26	A	G
MUT_001098	Burk_A_13081-7_mAb_7D10	SingleMut	RVKQIRTQIEEATSDYDREKLQERVYKLAG	26	A	Y
MUT_001099	Burk_A_13081-7_mAb_7D10	SingleMut	RVKQIRTQIEEATSDYDREKLQERVTKLAG	26	A	T
MUT_001100	Burk_A_13081-7_mAb_7D10	SingleMut	RVKQIRTQIEEATSDYDREKLQERVSKLAG	26	A	S
MUT_001101	Burk_A_13081-7_mAb_7D10	SingleMut	RVKQIRTQIEEATSDYDREKLQERVRKLAG	26	A	R
MUT_001102	Burk_A_13081-7_mAb_7D10	SingleMut	RVKQIRTQIEEATSDYDREKLQERVEKLAG	26	A	E
MUT_001103	Burk_A_13081-7_mAb_7D10	SingleMut	RVKQIRTQIEEATSDYDREKLQERVIKLAG	26	A	I
MUT_001104	Burk_A_13081-7_mAb_7D10	SingleMut	RVKQIRTQIEEATSDYDREKLQERVHKLAG	26	A	H
MUT_001105	Burk_A_13081-7_mAb_7D10	SingleMut	RVKQIRTQIEEATSDYDREKLQERVLKLAG	26	A	L
MUT_001106	Burk_A_13081-7_mAb_7D10	SingleMut	RVKQIRTQIEEATSDYDREKLQERVVKLAG	26	A	V
MUT_001107	Burk_A_13081-7_mAb_7D10	SingleMut	RVKQIRTQIEEATSDYDREKLQERVFKLAG	26	A	F
MUT_001108	Burk_A_13081-7_mAb_7D10	SingleMut	RVKQIRTQIEEATSDYDREKLQERVMKLAG	26	A	M
MUT_001109	Burk_A_13081-7_mAb_7D10	SingleMut	RVKQIRTQIEEATSDYDREKLQERVNKLAG	26	A	N
MUT_001110	Burk_A_13081-7_mAb_7D10	SingleMut	RVKQIRTQIEEATSDYDREKLQERVCKLAG	26	A	C
MUT_001111	Burk_A_13081-7_mAb_7D10	SingleMut	RVKQIRTQIEEATSDYDREKLQERVWKLAG	26	A	W
MUT_001112	Burk_A_13081-7_mAb_7D10	SingleMut	RVKQIRTQIEEATSDYDREKLQERVPKLAG	26	A	P
MUT_001113	Burk_A_13081-7_mAb_7D10	SingleMut	RVKQIRTQIEEATSDYDREKLQERVQKLAG	26	A	Q
MUT_001114	Burk_A_13081-7_mAb_7D10	SingleMut	RVKQIRTQIEEATSDYDREKLQERVKKLAG	26	A	K
MUT_001115	Burk_A_13081-7_mAb_7D10	SingleMut	RVKQIRTQIEEATSDYDREKLQERVDKLAG	26	A	D
MUT_001116	Burk_A_13081-7_mAb_7D10	SingleMut	RVKQIRTQIEEATSDYDREKLQERVAGLAG	27	K	G
MUT_001117	Burk_A_13081-7_mAb_7D10	SingleMut	RVKQIRTQIEEATSDYDREKLQERVAYLAG	27	K	Y
MUT_001118	Burk_A_13081-7_mAb_7D10	SingleMut	RVKQIRTQIEEATSDYDREKLQERVATLAG	27	K	T
MUT_001119	Burk_A_13081-7_mAb_7D10	SingleMut	RVKQIRTQIEEATSDYDREKLQERVASLAG	27	K	S
MUT_001120	Burk_A_13081-7_mAb_7D10	SingleMut	RVKQIRTQIEEATSDYDREKLQERVARLAG	27	K	R
MUT_001121	Burk_A_13081-7_mAb_7D10	SingleMut	RVKQIRTQIEEATSDYDREKLQERVAELAG	27	K	E
MUT_001122	Burk_A_13081-7_mAb_7D10	SingleMut	RVKQIRTQIEEATSDYDREKLQERVAILAG	27	K	I
MUT_001123	Burk_A_13081-7_mAb_7D10	SingleMut	RVKQIRTQIEEATSDYDREKLQERVAHLAG	27	K	H
MUT_001124	Burk_A_13081-7_mAb_7D10	SingleMut	RVKQIRTQIEEATSDYDREKLQERVALLAG	27	K	L
MUT_001125	Burk_A_13081-7_mAb_7D10	SingleMut	RVKQIRTQIEEATSDYDREKLQERVAVLAG	27	K	V
MUT_001126	Burk_A_13081-7_mAb_7D10	SingleMut	RVKQIRTQIEEATSDYDREKLQERVAFLAG	27	K	F
MUT_001127	Burk_A_13081-7_mAb_7D10	SingleMut	RVKQIRTQIEEATSDYDREKLQERVAMLAG	27	K	M
MUT_001128	Burk_A_13081-7_mAb_7D10	SingleMut	RVKQIRTQIEEATSDYDREKLQERVANLAG	27	K	N
MUT_001129	Burk_A_13081-7_mAb_7D10	SingleMut	RVKQIRTQIEEATSDYDREKLQERVACLAG	27	K	C
MUT_001130	Burk_A_13081-7_mAb_7D10	SingleMut	RVKQIRTQIEEATSDYDREKLQERVAWLAG	27	K	W
MUT_001131	Burk_A_13081-7_mAb_7D10	SingleMut	RVKQIRTQIEEATSDYDREKLQERVAPLAG	27	K	P
MUT_001132	Burk_A_13081-7_mAb_7D10	SingleMut	RVKQIRTQIEEATSDYDREKLQERVAALAG	27	K	A
MUT_001133	Burk_A_13081-7_mAb_7D10	SingleMut	RVKQIRTQIEEATSDYDREKLQERVAQLAG	27	K	Q
MUT_001134	Burk_A_13081-7_mAb_7D10	SingleMut	RVKQIRTQIEEATSDYDREKLQERVADLAG	27	K	D
MUT_001135	Burk_A_13081-7_mAb_7D10	SingleMut	RVKQIRTQIEEATSDYDREKLQERVAKGAG	28	L	G
MUT_001136	Burk_A_13081-7_mAb_7D10	SingleMut	RVKQIRTQIEEATSDYDREKLQERVAKYAG	28	L	Y
MUT_001137	Burk_A_13081-7_mAb_7D10	SingleMut	RVKQIRTQIEEATSDYDREKLQERVAKTAG	28	L	T
MUT_001138	Burk_A_13081-7_mAb_7D10	SingleMut	RVKQIRTQIEEATSDYDREKLQERVAKSAG	28	L	S
MUT_001139	Burk_A_13081-7_mAb_7D10	SingleMut	RVKQIRTQIEEATSDYDREKLQERVAKRAG	28	L	R
MUT_001140	Burk_A_13081-7_mAb_7D10	SingleMut	RVKQIRTQIEEATSDYDREKLQERVAKEAG	28	L	E
MUT_001141	Burk_A_13081-7_mAb_7D10	SingleMut	RVKQIRTQIEEATSDYDREKLQERVAKIAG	28	L	I
MUT_001142	Burk_A_13081-7_mAb_7D10	SingleMut	RVKQIRTQIEEATSDYDREKLQERVAKHAG	28	L	H
MUT_001143	Burk_A_13081-7_mAb_7D10	SingleMut	RVKQIRTQIEEATSDYDREKLQERVAKVAG	28	L	V
MUT_001144	Burk_A_13081-7_mAb_7D10	SingleMut	RVKQIRTQIEEATSDYDREKLQERVAKFAG	28	L	F
MUT_001145	Burk_A_13081-7_mAb_7D10	SingleMut	RVKQIRTQIEEATSDYDREKLQERVAKMAG	28	L	M
MUT_001146	Burk_A_13081-7_mAb_7D10	SingleMut	RVKQIRTQIEEATSDYDREKLQERVAKNAG	28	L	N
MUT_001147	Burk_A_13081-7_mAb_7D10	SingleMut	RVKQIRTQIEEATSDYDREKLQERVAKCAG	28	L	C
MUT_001148	Burk_A_13081-7_mAb_7D10	SingleMut	RVKQIRTQIEEATSDYDREKLQERVAKWAG	28	L	W
MUT_001149	Burk_A_13081-7_mAb_7D10	SingleMut	RVKQIRTQIEEATSDYDREKLQERVAKPAG	28	L	P
MUT_001150	Burk_A_13081-7_mAb_7D10	SingleMut	RVKQIRTQIEEATSDYDREKLQERVAKAAG	28	L	A
MUT_001151	Burk_A_13081-7_mAb_7D10	SingleMut	RVKQIRTQIEEATSDYDREKLQERVAKQAG	28	L	Q
MUT_001152	Burk_A_13081-7_mAb_7D10	SingleMut	RVKQIRTQIEEATSDYDREKLQERVAKKAG	28	L	K
MUT_001153	Burk_A_13081-7_mAb_7D10	SingleMut	RVKQIRTQIEEATSDYDREKLQERVAKDAG	28	L	D
MUT_001154	Burk_A_13081-7_mAb_7D10	SingleMut	RVKQIRTQIEEATSDYDREKLQERVAKLGG	29	A	G
MUT_001155	Burk_A_13081-7_mAb_7D10	SingleMut	RVKQIRTQIEEATSDYDREKLQERVAKLYG	29	A	Y
MUT_001156	Burk_A_13081-7_mAb_7D10	SingleMut	RVKQIRTQIEEATSDYDREKLQERVAKLTG	29	A	T
MUT_001157	Burk_A_13081-7_mAb_7D10	SingleMut	RVKQIRTQIEEATSDYDREKLQERVAKLSG	29	A	S
MUT_001158	Burk_A_13081-7_mAb_7D10	SingleMut	RVKQIRTQIEEATSDYDREKLQERVAKLRG	29	A	R
MUT_001159	Burk_A_13081-7_mAb_7D10	SingleMut	RVKQIRTQIEEATSDYDREKLQERVAKLEG	29	A	E
MUT_001160	Burk_A_13081-7_mAb_7D10	SingleMut	RVKQIRTQIEEATSDYDREKLQERVAKLIG	29	A	I
MUT_001161	Burk_A_13081-7_mAb_7D10	SingleMut	RVKQIRTQIEEATSDYDREKLQERVAKLHG	29	A	H
MUT_001162	Burk_A_13081-7_mAb_7D10	SingleMut	RVKQIRTQIEEATSDYDREKLQERVAKLLG	29	A	L
MUT_001163	Burk_A_13081-7_mAb_7D10	SingleMut	RVKQIRTQIEEATSDYDREKLQERVAKLVG	29	A	V
MUT_001164	Burk_A_13081-7_mAb_7D10	SingleMut	RVKQIRTQIEEATSDYDREKLQERVAKLFG	29	A	F
MUT_001165	Burk_A_13081-7_mAb_7D10	SingleMut	RVKQIRTQIEEATSDYDREKLQERVAKLMG	29	A	M
MUT_001166	Burk_A_13081-7_mAb_7D10	SingleMut	RVKQIRTQIEEATSDYDREKLQERVAKLNG	29	A	N
MUT_001167	Burk_A_13081-7_mAb_7D10	SingleMut	RVKQIRTQIEEATSDYDREKLQERVAKLCG	29	A	C
MUT_001168	Burk_A_13081-7_mAb_7D10	SingleMut	RVKQIRTQIEEATSDYDREKLQERVAKLWG	29	A	W
MUT_001169	Burk_A_13081-7_mAb_7D10	SingleMut	RVKQIRTQIEEATSDYDREKLQERVAKLPG	29	A	P
MUT_001170	Burk_A_13081-7_mAb_7D10	SingleMut	RVKQIRTQIEEATSDYDREKLQERVAKLQG	29	A	Q
MUT_001171	Burk_A_13081-7_mAb_7D10	SingleMut	RVKQIRTQIEEATSDYDREKLQERVAKLKG	29	A	K
MUT_001172	Burk_A_13081-7_mAb_7D10	SingleMut	RVKQIRTQIEEATSDYDREKLQERVAKLDG	29	A	D
MUT_001173	Burk_A_13081-7_mAb_7D10	SingleMut	RVKQIRTQIEEATSDYDREKLQERVAKLAY	30	G	Y
MUT_001174	Burk_A_13081-7_mAb_7D10	SingleMut	RVKQIRTQIEEATSDYDREKLQERVAKLAT	30	G	T
MUT_001175	Burk_A_13081-7_mAb_7D10	SingleMut	RVKQIRTQIEEATSDYDREKLQERVAKLAS	30	G	S
MUT_001176	Burk_A_13081-7_mAb_7D10	SingleMut	RVKQIRTQIEEATSDYDREKLQERVAKLAR	30	G	R
MUT_001177	Burk_A_13081-7_mAb_7D10	SingleMut	RVKQIRTQIEEATSDYDREKLQERVAKLAE	30	G	E
MUT_001178	Burk_A_13081-7_mAb_7D10	SingleMut	RVKQIRTQIEEATSDYDREKLQERVAKLAI	30	G	I
MUT_001179	Burk_A_13081-7_mAb_7D10	SingleMut	RVKQIRTQIEEATSDYDREKLQERVAKLAH	30	G	H
MUT_001180	Burk_A_13081-7_mAb_7D10	SingleMut	RVKQIRTQIEEATSDYDREKLQERVAKLAL	30	G	L
MUT_001181	Burk_A_13081-7_mAb_7D10	SingleMut	RVKQIRTQIEEATSDYDREKLQERVAKLAV	30	G	V
MUT_001182	Burk_A_13081-7_mAb_7D10	SingleMut	RVKQIRTQIEEATSDYDREKLQERVAKLAF	30	G	F
MUT_001183	Burk_A_13081-7_mAb_7D10	SingleMut	RVKQIRTQIEEATSDYDREKLQERVAKLAM	30	G	M
MUT_001184	Burk_A_13081-7_mAb_7D10	SingleMut	RVKQIRTQIEEATSDYDREKLQERVAKLAN	30	G	N
MUT_001185	Burk_A_13081-7_mAb_7D10	SingleMut	RVKQIRTQIEEATSDYDREKLQERVAKLAC	30	G	C
MUT_001186	Burk_A_13081-7_mAb_7D10	SingleMut	RVKQIRTQIEEATSDYDREKLQERVAKLAW	30	G	W
MUT_001187	Burk_A_13081-7_mAb_7D10	SingleMut	RVKQIRTQIEEATSDYDREKLQERVAKLAP	30	G	P
MUT_001188	Burk_A_13081-7_mAb_7D10	SingleMut	RVKQIRTQIEEATSDYDREKLQERVAKLAA	30	G	A
MUT_001189	Burk_A_13081-7_mAb_7D10	SingleMut	RVKQIRTQIEEATSDYDREKLQERVAKLAQ	30	G	Q
MUT_001190	Burk_A_13081-7_mAb_7D10	SingleMut	RVKQIRTQIEEATSDYDREKLQERVAKLAK	30	G	K
MUT_001191	Burk_A_13081-7_mAb_7D10	SingleMut	RVKQIRTQIEEATSDYDREKLQERVAKLAD	30	G	D
MUT_001192	Burk_A_13081-7_mAb_7D10	Slide	VKQIRTQIEEATSDYDREKLQERVAKLAGT				2	30
MUT_001193	Burk_A_13081-7_mAb_7D10	Slide	TRVKQIRTQIEEATSDYDREKLQERVAKLA				1	29
MUT_001194	Burk_A_13081-7_mAb_7D10	Slide	KQIRTQIEEATSDYDREKLQERVAKLAGTT				3	30
MUT_001195	Burk_A_13081-7_mAb_7D10	Slide	AARVKQIRTQIEEATSDYDREKLQERVAKL				1	28
MUT_001196	Burk_A_13081-7_mAb_7D10	Slide	QIRTQIEEATSDYDREKLQERVAKLAGAGG				4	30
MUT_001197	Burk_A_13081-7_mAb_7D10	Slide	GTTRVKQIRTQIEEATSDYDREKLQERVAK				1	27
MUT_001198	Burk_A_13081-7_mAb_7D10	Slide	IRTQIEEATSDYDREKLQERVAKLAGTGSG				5	30
MUT_001199	Burk_A_13081-7_mAb_7D10	Slide	GSGTRVKQIRTQIEEATSDYDREKLQERVA				1	26
MUT_001200	Burk_A_13081-7_mAb_7D10	Slide	RTQIEEATSDYDREKLQERVAKLAGSGAGT				6	30
MUT_001201	Burk_A_13081-7_mAb_7D10	Slide	STGTSRVKQIRTQIEEATSDYDREKLQERV				1	25
MUT_001202	Burk_A_13081-7_mAb_7D10	Slide	TQIEEATSDYDREKLQERVAKLAGGTSAAG				7	30
MUT_001203	Burk_A_13081-7_mAb_7D10	Slide	GTSAASRVKQIRTQIEEATSDYDREKLQER				1	24
MUT_001204	Burk_A_13081-7_mAb_7D10	Slide	QIEEATSDYDREKLQERVAKLAGSTSTSST				8	30
MUT_001205	Burk_A_13081-7_mAb_7D10	Slide	TGSTSTARVKQIRTQIEEATSDYDREKLQE				1	23
MUT_001206	Burk_A_13081-7_mAb_7D10	Slide	IEEATSDYDREKLQERVAKLAGSTGSASTA				9	30
MUT_001207	Burk_A_13081-7_mAb_7D10	Slide	GSSSASASRVKQIRTQIEEATSDYDREKLQ				1	22
MUT_001208	Burk_A_13081-7_mAb_7D10	Slide	EEATSDYDREKLQERVAKLAGTTTGAGGAS				10	30
MUT_001209	Burk_A_13081-7_mAb_7D10	Slide	ASASTSTGTRVKQIRTQIEEATSDYDREKL				1	21
MUT_001210	Burk_A_13081-7_mAb_7D10	Slide	EATSDYDREKLQERVAKLAGSTSSSTGGGG				11	30
MUT_001211	Burk_A_13081-7_mAb_7D10	Slide	SGTTGGSGAGRVKQIRTQIEEATSDYDREK				1	20
MUT_001212	Burk_A_13081-7_mAb_7D10	Slide	ATSDYDREKLQERVAKLAGAAATSSATSSS				12	30
MUT_001213	Burk_A_13081-7_mAb_7D10	Slide	GATSTGSGGGGRVKQIRTQIEEATSDYDRE				1	19
MUT_001214	Burk_A_13081-7_mAb_7D10	Slide	TSDYDREKLQERVAKLAGTTSAAGGSGTAA				13	30
MUT_001215	Burk_A_13081-7_mAb_7D10	Slide	AGTATATGGAGSRVKQIRTQIEEATSDYDR				1	18
MUT_001216	Burk_A_13081-7_mAb_7D10	Slide	SDYDREKLQERVAKLAGAGAATGSGSTSSS				14	30
MUT_001217	Burk_A_13081-7_mAb_7D10	Slide	SATSTTSGSTGAARVKQIRTQIEEATSDYD				1	17
MUT_001218	Burk_A_13081-7_mAb_7D10	Slide	DYDREKLQERVAKLAGTATTSTGGGGTGTT				15	30
MUT_001219	Burk_A_13081-7_mAb_7D10	Slide	ASSTGTAGAGTSGSRVKQIRTQIEEATSDY				1	16
MUT_001220	Burk_A_13081-7_mAb_7D10	Slide	YDREKLQERVAKLAGASAGSSGSAGSSAGT				16	30
MUT_001221	Burk_A_13081-7_mAb_7D10	Slide	GAAGGTGGSSAATGSRVKQIRTQIEEATSD				1	15
MUT_001222	Burk_A_13081-7_mAb_7D10	Slide	DREKLQERVAKLAGTTSAGGAAGGTGSSAA				17	30
MUT_001223	Burk_A_13081-7_mAb_7D10	Slide	SGATGTGSSSAGTGTTRVKQIRTQIEEATS				1	14
MUT_001224	Burk_A_13081-7_mAb_7D10	Slide	REKLQERVAKLAGGSGSAATSGTSSATGTA				18	30
MUT_001225	Burk_A_13081-7_mAb_7D10	Slide	STASGSSAAASGAGTGSRVKQIRTQIEEAT				1	13
MUT_001226	Burk_A_13081-7_mAb_7D10	Slide	EKLQERVAKLAGGTSTAGGGATGSGATTGS				19	30
MUT_001227	Burk_A_13081-7_mAb_7D10	Slide	SAASTASSSTSASGASAGRVKQIRTQIEEA				1	12
MUT_001228	Burk_A_13081-7_mAb_7D10	Slide	KLQERVAKLAGGASGGTGSTAGTGSSSGAT				20	30
MUT_001229	Burk_A_13081-7_mAb_7D10	Slide	ATTSSTTASATAASAASAARVKQIRTQIEE				1	11
MUT_001230	Burk_A_13081-7_mAb_7D10	Slide	LQERVAKLAGATGTSGASAAATAGAGTSTG				21	30
MUT_001231	Burk_A_13081-7_mAb_7D10	Slide	SATGTAGGGGSTTATGAASTRVKQIRTQIE				1	10
MUT_001232	Burk_A_13081-7_mAb_7D10	Slide	QERVAKLAGTASTAAGAASASGTGTSTGAT				22	30
MUT_001233	Burk_A_13081-7_mAb_7D10	Slide	GSGGGAASTSATTTTATGSGGRVKQIRTQI				1	9
MUT_001234	Burk_A_13081-7_mAb_7D10	Slide	ERVAKLAGGATATGAATGSSGTTSTGTTGS				23	30
MUT_001235	Burk_A_13081-7_mAb_7D10	Slide	GASSTSAGAGTTSGAASGGAASRVKQIRTQ				1	8
MUT_001236	Burk_A_13081-7_mAb_7D10	Slide	RVAKLAGTAAGSSSTSASAATTTAGGSSSS				24	30
MUT_001237	Burk_A_13081-7_mAb_7D10	Slide	GGGATAGAASTSGSGGTSTTGTGRVKQIRT				1	7
MUT_001238	Burk_A_13081-7_mAb_7D10	Slide	VAKLAGGGSTTGTAGGTGGAASGSSGAAGG				25	30
MUT_001239	Burk_A_13081-7_mAb_7D10	Slide	TTSGSGGGGSATGTSASTATGTTSRVKQIR				1	6
MUT_001240	Burk_A_13081-7_mAb_7D10	Slide	AKLAGAATGGASGSGSSAASGGSSGSSSAT				26	30
MUT_001241	Burk_A_13081-7_mAb_7D10	Slide	AGSTSTSAGAAAGGSTTTGGSSAATRVKQI				1	5
